# Supplementary material for: Proteomic characterization of phagocytic primary human monocyte-derived macrophages
Source: Royal Society of Chemistry journal article supplement (doi:10.1039/d2cb00076h), 2022-01-01
Supplement: d2cb00076h1.xlsx [file d2cb00076h1.xlsx]

## Sheet: Table 6
Protein Group	Top	Accession	-10LgP	#Peptides	#Unique	#Spec D5_-S_Met	#Spec D5_-S_HPG	D5_-S	#Spec D5_+S_Met	#Spec D5_+S_HPG	D5_+S	#Spec D4_-S_Met	#Spec D4_-S_HPG	D4_-S	#Spec D4_+S_Met	#Spec D4_+S_HPG	D4_+S	#Spec D9_-S_Met	#Spec D9_-S_HPG	D9_-S	#Spec D9_+S_Met	#Spec D9_+S_HPG	D9_+S	PTM	Average Mass	Description
365	TRUE	P23458|JAK1_HUMAN	311.136	26	26	1	65	65	2	148	74		1	1		39	39		60	60		77	77	Carbamidomethylation	133277	Tyrosine-protein kinase JAK1 OS=Homo sapiens OX=9606 GN=JAK1 PE=1 SV=2
86	TRUE	P35221|CTNA1_HUMAN	397.649	36	29	3	143	47.6667	2	260	130		88	88	1	130	130	2	137	68.5	11	233	21.1818	Carbamidomethylation; Oxidation (M)	100071	Catenin alpha-1 OS=Homo sapiens OX=9606 GN=CTNNA1 PE=1 SV=1
1149	TRUE	Q15011|HERP1_HUMAN	219.283	9	9		44	44		55	55		55	55		74	74		36	36		57	57	Carbamidomethylation; Oxidation (M)	43719.9	Homocysteine-responsive endoplasmic reticulum-resident ubiquitin-like domain member 1 protein OS=Homo sapiens OX=9606 GN=HERPUD1 PE=1 SV=1
1158	TRUE	O15397|IPO8_HUMAN	218.169	10	10	1	42	42		50	50		1	1		11	11		18	18		22	22		119938	Importin-8 OS=Homo sapiens OX=9606 GN=IPO8 PE=1 SV=2
828	TRUE	P31350|RIR2_HUMAN	250.02	13	13		37	37		14	14		22	22					49	49				Carbamidomethylation	44877.7	Ribonucleoside-diphosphate reductase subunit M2 OS=Homo sapiens OX=9606 GN=RRM2 PE=1 SV=1
750	TRUE	Q15904|VAS1_HUMAN	257.438	12	12	1	34	34	2	69	34.5		51	51		73	73	2	48	24	2	57	28.5	Oxidation (M)	52025.8	V-type proton ATPase subunit S1 OS=Homo sapiens OX=9606 GN=ATP6AP1 PE=1 SV=2
991	TRUE	P16035|TIMP2_HUMAN	233.566	7	7		33	33		45	45		73	73		58	58	1	38	38		35	35	Carbamidomethylation	24399.3	Metalloproteinase inhibitor 2 OS=Homo sapiens OX=9606 GN=TIMP2 PE=1 SV=2
833	TRUE	O60315|ZEB2_HUMAN	249.532	16	16		32	32		73	73		5	5		51	51		27	27		42	42	Carbamidomethylation	136447	Zinc finger E-box-binding homeobox 2 OS=Homo sapiens OX=9606 GN=ZEB2 PE=1 SV=1
1019	TRUE	P07333|CSF1R_HUMAN	230.484	9	9		32	32		48	48					17	17		15	15		29	29	Carbamidomethylation	107984	Macrophage colony-stimulating factor 1 receptor OS=Homo sapiens OX=9606 GN=CSF1R PE=1 SV=2
1257	TRUE	Q6NUT3|MFS12_HUMAN	208.892	6	6		32	32	22	42	1.90909	5						11	25	2.27273	16	43	2.6875	Carbamidomethylation	52075.3	Major facilitator superfamily domain-containing protein 12 OS=Homo sapiens OX=9606 GN=MFSD12 PE=1 SV=2
603	TRUE	Q06481|APLP2_HUMAN	277.158	14	14		31	31		85	85		20	20		50	50		23	23		51	51	Oxidation (M); Carbamidomethylation	86955.8	Amyloid-like protein 2 OS=Homo sapiens OX=9606 GN=APLP2 PE=1 SV=2
680	TRUE	Q0VAM2|RGF1B_HUMAN	265.111	17	17		31	31		90	90		23	23		63	63		28	28		42	42	Carbamidomethylation	55359.5	Ras-GEF domain-containing family member 1B OS=Homo sapiens OX=9606 GN=RASGEF1B PE=1 SV=2
1703	TRUE	Q8TEL6|TP4AP_HUMAN	172.341	6	6		31	31		25	25					6	6		20	20		20	20		90852.1	Short transient receptor potential channel 4-associated protein OS=Homo sapiens OX=9606 GN=TRPC4AP PE=1 SV=2
897	TRUE	Q16850|CP51A_HUMAN	243.123	13	13		31	31		67	67		14	14		82	82	2	39	19.5		19	19	Carbamidomethylation	56805.8	Lanosterol 14-alpha demethylase OS=Homo sapiens OX=9606 GN=CYP51A1 PE=1 SV=3
1622	TRUE	P10451|OSTP_HUMAN	179.135	5	5		31	31		17	17		3	3					16	16		16	16		35422.7	Osteopontin OS=Homo sapiens OX=9606 GN=SPP1 PE=1 SV=1
1335	TRUE	P04035|HMDH_HUMAN	202.976	9	9		31	31		32	32					3	3		21	21		2	2	Carbamidomethylation	97476.1	3-hydroxy-3-methylglutaryl-coenzyme A reductase OS=Homo sapiens OX=9606 GN=HMGCR PE=1 SV=1
1383	TRUE	P09237|MMP7_HUMAN	199.457	9	9		30	30		40	40		8	8		6	6		6	6		31	31	Carbamidomethylation	29676.8	Matrilysin OS=Homo sapiens OX=9606 GN=MMP7 PE=1 SV=1
1112	TRUE	P42345|MTOR_HUMAN	222.182	14	14	1	29	29	8	16	2								2	2		9	9	Carbamidomethylation	288892	Serine/threonine-protein kinase mTOR OS=Homo sapiens OX=9606 GN=MTOR PE=1 SV=1
2349	TRUE	Q13571|LAPM5_HUMAN	127.143	2	2		26	26	1	34	34	2	23	11.5	4	33	8.25		29	29		26	26		29936.9	Lysosomal-associated transmembrane protein 5 OS=Homo sapiens OX=9606 GN=LAPTM5 PE=1 SV=1
418	TRUE	Q13618|CUL3_HUMAN	302.641	19	19	2	49	24.5		90	90	1	23	23		62	62	1	40	40		65	65	Carbamidomethylation	88930.2	Cullin-3 OS=Homo sapiens OX=9606 GN=CUL3 PE=1 SV=2
1930	TRUE	P30281|CCND3_HUMAN	157.11	5	4		24	24		22	22		12	12					15	15		20	20	Carbamidomethylation	32519.7	G1/S-specific cyclin-D3 OS=Homo sapiens OX=9606 GN=CCND3 PE=1 SV=2
1126	TRUE	P67870|CSK2B_HUMAN	221.238	8	8	1	24	24	3	37	12.3333		49	49		39	39	6	23	3.83333	5	35	7	Carbamidomethylation	24942.4	Casein kinase II subunit beta OS=Homo sapiens OX=9606 GN=CSNK2B PE=1 SV=1
1308	TRUE	Q86VP1|TAXB1_HUMAN	204.464	8	8		22	22		34	34		1	1		9	9		12	12		24	24	Carbamidomethylation	90877.1	Tax1-binding protein 1 OS=Homo sapiens OX=9606 GN=TAX1BP1 PE=1 SV=2
1456	TRUE	Q09161|NCBP1_HUMAN	193.654	10	10		22	22	16	25	1.5625	3	4	1.33333		3	3	15	14	0.933333	9	17	1.88889	Carbamidomethylation	91839.4	Nuclear cap-binding protein subunit 1 OS=Homo sapiens OX=9606 GN=NCBP1 PE=1 SV=1
1788	TRUE	Q14534|ERG1_HUMAN	165.77	5	5		22	22		8	8		1	1		2	2	3	10	3.33333	1	1	1		63923.1	Squalene monooxygenase OS=Homo sapiens OX=9606 GN=SQLE PE=1 SV=3
625	TRUE	P05067|A4_HUMAN	273.683	15	15		21	21		104	104		46	46		83	83		39	39		99	99	Carbamidomethylation; Oxidation (M)	86943.2	Amyloid-beta precursor protein OS=Homo sapiens OX=9606 GN=APP PE=1 SV=3
1323	TRUE	P13196|HEM1_HUMAN	203.814	8	8		21	21		35	35		15	15		11	11		17	17		10	10	Carbamidomethylation; Oxidation (M)	70580.8	5-aminolevulinate synthase, nonspecific, mitochondrial OS=Homo sapiens OX=9606 GN=ALAS1 PE=1 SV=2
1532	TRUE	P33992|MCM5_HUMAN	187.244	9	9	1	21	21		4	4					1	1	4	22	5.5		10	10	Carbamidomethylation	82285.5	DNA replication licensing factor MCM5 OS=Homo sapiens OX=9606 GN=MCM5 PE=1 SV=5
1731	TRUE	Q15397|PUM3_HUMAN	170.078	6	6		20	20		26	26		8	8		19	19		13	13	1	23	23	Carbamidomethylation	73584.4	Pumilio homolog 3 OS=Homo sapiens OX=9606 GN=PUM3 PE=1 SV=3
2452	TRUE	O15091|MRPP3_HUMAN	119.843	3	3	1	20	20		15	15		1	1				1	27	27		19	19	Carbamidomethylation	67315.3	Mitochondrial ribonuclease P catalytic subunit OS=Homo sapiens OX=9606 GN=PRORP PE=1 SV=2
1604	TRUE	P09603|CSF1_HUMAN	181.012	6	6		20	20		20	20								15	15		8	8	Carbamidomethylation	60179.5	Macrophage colony-stimulating factor 1 OS=Homo sapiens OX=9606 GN=CSF1 PE=1 SV=2
1376	TRUE	O60266|ADCY3_HUMAN	200.013	6	6		19	19		16	16		1	1					20	20		12	12		128960	Adenylate cyclase type 3 OS=Homo sapiens OX=9606 GN=ADCY3 PE=1 SV=3
584	TRUE	Q5SRE5|NU188_HUMAN	279.514	27	27	4	75	18.75	5	117	23.4					9	9	3	35	11.6667	1	19	19	Carbamidomethylation	196043	Nucleoporin NUP188 homolog OS=Homo sapiens OX=9606 GN=NUP188 PE=1 SV=1
903	TRUE	P25440|BRD2_HUMAN	242.832	9	9		17	17		58	58		7	7		20	20		11	11		11	11		88060.8	Bromodomain-containing protein 2 OS=Homo sapiens OX=9606 GN=BRD2 PE=1 SV=2
2042	TRUE	Q9P0I2|EMC3_HUMAN	149.215	4	4	1	17	17		11	11					9	9	1	13	13	3	10	3.33333		29952	ER membrane protein complex subunit 3 OS=Homo sapiens OX=9606 GN=EMC3 PE=1 SV=3
1636	TRUE	P48426|PI42A_HUMAN	177.917	7	6		17	17	13	10	0.769231	29	17	0.586207	35	29	0.828571	12	4	0.333333	19	18	0.947368		46224.6	Phosphatidylinositol 5-phosphate 4-kinase type-2 alpha OS=Homo sapiens OX=9606 GN=PIP4K2A PE=1 SV=2
1035	TRUE	Q12846|STX4_HUMAN	229.069	11	11	2	33	16.5	2	31	15.5		6	6	10	14	1.4		5	5	3	23	7.66667		34179.9	Syntaxin-4 OS=Homo sapiens OX=9606 GN=STX4 PE=1 SV=2
1121	TRUE	Q02809|PLOD1_HUMAN	221.584	14	14	1	16	16	1	35	35	1	10	10		23	23	7	25	3.57143	1	35	35	Carbamidomethylation	83550.2	Procollagen-lysine,2-oxoglutarate 5-dioxygenase 1 OS=Homo sapiens OX=9606 GN=PLOD1 PE=1 SV=2
2029	TRUE	P35625|TIMP3_HUMAN	150.094	4	4		16	16		17	17		19	19		19	19		7	7		7	7	Carbamidomethylation	24145	Metalloproteinase inhibitor 3 OS=Homo sapiens OX=9606 GN=TIMP3 PE=1 SV=2
2475	TRUE	O95379|TFIP8_HUMAN	118.103	2	2		16	16	24	20	0.833333	16	26	1.625		51	51	5	9	1.8	9	4	0.444444	Oxidation (M)	23003.4	Tumor necrosis factor alpha-induced protein 8 OS=Homo sapiens OX=9606 GN=TNFAIP8 PE=1 SV=1
1290	TRUE	P51532|SMCA4_HUMAN	206.177	11	4	2	31	15.5	7	30	4.28571					5	5		14	14	1	15	15		184646	Transcription activator BRG1 OS=Homo sapiens OX=9606 GN=SMARCA4 PE=1 SV=2
1770	TRUE	O76080|ZFAN5_HUMAN	167.02	4	4		15	15					34	34		45	45		30	30		30	30	Carbamidomethylation	23132.1	AN1-type zinc finger protein 5 OS=Homo sapiens OX=9606 GN=ZFAND5 PE=1 SV=1
1718	TRUE	Q9UHW9|S12A6_HUMAN	170.611	8	6		15	15	4	28	7					1	1	8	12	1.5	2	15	7.5		127617	Solute carrier family 12 member 6 OS=Homo sapiens OX=9606 GN=SLC12A6 PE=1 SV=2
1865	TRUE	P19404|NDUV2_HUMAN	161.143	4	4		15	15	5	21	4.2		9	9		14	14	4	18	4.5	11	14	1.27273		27391.5	NADH dehydrogenase [ubiquinone] flavoprotein 2, mitochondrial OS=Homo sapiens OX=9606 GN=NDUFV2 PE=1 SV=2
1987	TRUE	P61916|NPC2_HUMAN	152.624	3	3		15	15	13	11	0.846154	14	14	1		13	13	15	15	1	12	15	1.25	Oxidation (M); Carbamidomethylation	16570.2	NPC intracellular cholesterol transporter 2 OS=Homo sapiens OX=9606 GN=NPC2 PE=1 SV=1
2085	TRUE	Q9NV96|CC50A_HUMAN	146.455	2	2	2	29	14.5	1	10	10		12	12		18	18	8	15	1.875		21	21	Carbamidomethylation	40683.7	Cell cycle control protein 50A OS=Homo sapiens OX=9606 GN=TMEM30A PE=1 SV=1
1885	TRUE	Q9H2P0|ADNP_HUMAN	160.082	3	3		14	14		26	26					10	10		17	17		24	24		123563	Activity-dependent neuroprotector homeobox protein OS=Homo sapiens OX=9606 GN=ADNP PE=1 SV=1
1017	TRUE	P08910|ABHD2_HUMAN	230.671	9	9		14	14	4	66	16.5		14	14	1	28	28		19	19		23	23	Carbamidomethylation	48314.9	Monoacylglycerol lipase ABHD2 OS=Homo sapiens OX=9606 GN=ABHD2 PE=1 SV=1
1103	TRUE	Q12882|DPYD_HUMAN	222.691	13	13		14	14		43	43					14	14		15	15		14	14	Carbamidomethylation	111401	Dihydropyrimidine dehydrogenase [NADP(+)] OS=Homo sapiens OX=9606 GN=DPYD PE=1 SV=2
1443	TRUE	Q86XS8|GOLI_HUMAN	194.598	7	7		14	14		31	31		6	6		11	11		12	12		14	14	Carbamidomethylation	46404.9	E3 ubiquitin-protein ligase RNF130 OS=Homo sapiens OX=9606 GN=RNF130 PE=1 SV=1
2235	TRUE	Q9H9T3|ELP3_HUMAN	137.054	4	4		14	14		20	20		1	1		2	2	1	12	12	1	13	13		62258.9	Elongator complex protein 3 OS=Homo sapiens OX=9606 GN=ELP3 PE=1 SV=2
1044	TRUE	Q9NZK5|ADA2_HUMAN	228.521	11	11		14	14		29	29		23	23		22	22		18	18		10	10	Carbamidomethylation	58933.6	Adenosine deaminase 2 OS=Homo sapiens OX=9606 GN=ADA2 PE=1 SV=2
1119	TRUE	P26358|DNMT1_HUMAN	221.669	15	15		14	14	3	39	13					5	5		13	13		3	3	Carbamidomethylation	183165	DNA (cytosine-5)-methyltransferase 1 OS=Homo sapiens OX=9606 GN=DNMT1 PE=1 SV=2
1633	TRUE	Q5H9U9|DDX6L_HUMAN	178.224	11	9	2	28	14	8	63	7.875											2	2	Carbamidomethylation	197674	Probable ATP-dependent RNA helicase DDX60-like OS=Homo sapiens OX=9606 GN=DDX60L PE=2 SV=2
1054	TRUE	P51531|SMCA2_HUMAN	228.072	11	4	2	26	13	6	33	5.5					8	8	2	16	8	1	18	18		181279	Probable global transcription activator SNF2L2 OS=Homo sapiens OX=9606 GN=SMARCA2 PE=1 SV=2
1228	TRUE	P30511|HLAF_HUMAN	211.213	9	5	1	13	13	7	36	5.14286		2	2		17	17	3	7	2.33333	8	29	3.625	Carbamidomethylation	39061.7	HLA class I histocompatibility antigen, alpha chain F OS=Homo sapiens OX=9606 GN=HLA-F PE=1 SV=3
1057	TRUE	Q8IXQ6|PARP9_HUMAN	227.567	16	16		13	13	34	34	1	1			10	11	1.1	8	19	2.375	21	40	1.90476	Carbamidomethylation	96343.2	Protein mono-ADP-ribosyltransferase PARP9 OS=Homo sapiens OX=9606 GN=PARP9 PE=1 SV=2
555	TRUE	Q9UKV5|AMFR_HUMAN	282.502	13	13		12	12		56	56		6	6		7	7		34	34		54	54	Carbamidomethylation	72995.8	E3 ubiquitin-protein ligase AMFR OS=Homo sapiens OX=9606 GN=AMFR PE=1 SV=2
1104	TRUE	P21757|MSRE_HUMAN	222.655	7	7	1	12	12		16	16		25	25		33	33	3	26	8.66667		17	17	Carbamidomethylation	49762.1	Macrophage scavenger receptor types I and II OS=Homo sapiens OX=9606 GN=MSR1 PE=1 SV=1
597	FALSE	Q86UP8|GTD2A_HUMAN	117.517	2	2	1	12	12		9	9		15	15		12	12	2	4	2		6	6		107168	General transcription factor II-I repeat domain-containing protein 2A OS=Homo sapiens OX=9606 GN=GTF2IRD2 PE=1 SV=3
597	FALSE	Q6EKJ0|GTD2B_HUMAN	117.517	2	2	1	12	12		9	9		15	15		12	12	2	4	2		6	6		107233	General transcription factor II-I repeat domain-containing protein 2B OS=Homo sapiens OX=9606 GN=GTF2IRD2B PE=1 SV=1
426	TRUE	Q16706|MA2A1_HUMAN	300.929	24	24	6	69	11.5	23	79	3.43478		13	13		29	29	8	42	5.25	14	68	4.85714	Carbamidomethylation	131141	Alpha-mannosidase 2 OS=Homo sapiens OX=9606 GN=MAN2A1 PE=1 SV=2
1830	TRUE	O14503|BHE40_HUMAN	163.477	4	4		11	11		13	13		21	21		23	23		16	16		13	13	Carbamidomethylation	45510	Class E basic helix-loop-helix protein 40 OS=Homo sapiens OX=9606 GN=BHLHE40 PE=1 SV=1
995	TRUE	Q13093|PAFA_HUMAN	232.949	10	10	1	11	11		32	32		7	7		20	20		3	3		12	12	Carbamidomethylation	50077.4	Platelet-activating factor acetylhydrolase OS=Homo sapiens OX=9606 GN=PLA2G7 PE=1 SV=1
488	TRUE	P42679|MATK_HUMAN	293.048	13	13	1	11	11	16	84	5.25	25	44	1.76	18	82	4.55556	17	36	2.11765	14	71	5.07143	Carbamidomethylation	56468.9	Megakaryocyte-associated tyrosine-protein kinase OS=Homo sapiens OX=9606 GN=MATK PE=1 SV=1
1813	TRUE	P19623|SPEE_HUMAN	164.37	5	5		11	11	7	6	0.857143	7	9	1.28571		7	7	9	9	1	7	14	2	Carbamidomethylation	33824.7	Spermidine synthase OS=Homo sapiens OX=9606 GN=SRM PE=1 SV=1
2622	TRUE	Q9Y286|SIGL7_HUMAN	109.555	2	2		11	11	8	16	2	1	3	3				5	3	0.6					51142.7	Sialic acid-binding Ig-like lectin 7 OS=Homo sapiens OX=9606 GN=SIGLEC7 PE=1 SV=1
581	TRUE	Q8TDB6|DTX3L_HUMAN	279.789	21	21	3	32	10.6667	31	101	3.25806	1	2	2	6	63	10.5	6	32	5.33333	26	61	2.34615	Carbamidomethylation	83554.3	E3 ubiquitin-protein ligase DTX3L OS=Homo sapiens OX=9606 GN=DTX3L PE=1 SV=1
1414	TRUE	Q8WVX9|FACR1_HUMAN	197.209	9	9		10	10	1	35	35		3	3		27	27		13	13		23	23	Carbamidomethylation	59356.7	Fatty acyl-CoA reductase 1 OS=Homo sapiens OX=9606 GN=FAR1 PE=1 SV=1
770	TRUE	Q8IWV8|UBR2_HUMAN	255.912	16	16		10	10	4	59	14.75					6	6		6	6	1	18	18	Carbamidomethylation	200538	E3 ubiquitin-protein ligase UBR2 OS=Homo sapiens OX=9606 GN=UBR2 PE=1 SV=1
1013	TRUE	Q9BYX4|IFIH1_HUMAN	231.306	14	14		10	10	12	89	7.41667					12	12		2	2		18	18	Carbamidomethylation	116689	Interferon-induced helicase C domain-containing protein 1 OS=Homo sapiens OX=9606 GN=IFIH1 PE=1 SV=3
1594	TRUE	P35869|AHR_HUMAN	181.935	7	7		10	10		25	25		1	1		19	19		3	3		14	14	Carbamidomethylation	96147.4	Aryl hydrocarbon receptor OS=Homo sapiens OX=9606 GN=AHR PE=1 SV=2
2046	TRUE	O60256|KPRB_HUMAN	149.025	5	5	1	10	10	11	14	1.27273	1						3	7	2.33333	1	11	11		40925.7	Phosphoribosyl pyrophosphate synthase-associated protein 2 OS=Homo sapiens OX=9606 GN=PRPSAP2 PE=1 SV=1
1222	TRUE	O15438|MRP3_HUMAN	211.445	12	11	1	10	10	1	48	48					4	4		10	10		8	8	Carbamidomethylation	169343	Canalicular multispecific organic anion transporter 2 OS=Homo sapiens OX=9606 GN=ABCC3 PE=1 SV=3
2193	TRUE	O14981|BTAF1_HUMAN	139.685	8	8		10	10	1	17	17					1	1	3	4	1.33333		4	4		206887	TATA-binding protein-associated factor 172 OS=Homo sapiens OX=9606 GN=BTAF1 PE=1 SV=2
1835	TRUE	Q96KA5|CLP1L_HUMAN	163.048	5	5	1	10	10		12	12		2	2				11	8	0.727273	2	5	2.5		62229.2	Cleft lip and palate transmembrane protein 1-like protein OS=Homo sapiens OX=9606 GN=CLPTM1L PE=1 SV=1
1693	TRUE	O15270|SPTC2_HUMAN	173.181	6	6	1	10	10	7	22	3.14286		2	2	1	14	14		16	16	8	12	1.5	Carbamidomethylation	62924.3	Serine palmitoyltransferase 2 OS=Homo sapiens OX=9606 GN=SPTLC2 PE=1 SV=1
828	FALSE	Q7LG56|RIR2B_HUMAN	126.029	3	3		10	10		5	5								18	18					40736.5	Ribonucleoside-diphosphate reductase subunit M2 B OS=Homo sapiens OX=9606 GN=RRM2B PE=1 SV=1
2098	TRUE	O94906|PRP6_HUMAN	145.888	6	6	2	19	9.5	11	19	1.72727		1	1	1	7	7	1	3	3		7	7	Carbamidomethylation	106925	Pre-mRNA-processing factor 6 OS=Homo sapiens OX=9606 GN=PRPF6 PE=1 SV=1
155	TRUE	P02751|FINC_HUMAN	367.35	36	36		9	9		8	8		126	126		155	155		79	79		74	74	Carbamidomethylation	272320	Fibronectin OS=Homo sapiens OX=9606 GN=FN1 PE=1 SV=5
1937	TRUE	Q9UHC7|MKRN1_HUMAN	156.416	5	5		9	9		39	39		2	2		23	23		15	15		24	24	Carbamidomethylation	53349.4	E3 ubiquitin-protein ligase makorin-1 OS=Homo sapiens OX=9606 GN=MKRN1 PE=1 SV=3
1108	TRUE	Q9UL18|AGO1_HUMAN	222.464	11	8		9	9	3	31	10.3333		3	3		10	10	2	22	11	2	45	22.5	Carbamidomethylation	97214.3	Protein argonaute-1 OS=Homo sapiens OX=9606 GN=AGO1 PE=1 SV=3
1582	TRUE	Q8IWB1|IPRI_HUMAN	183.017	8	8		9	9		27	27					15	15	1	11	11	1	16	16	Carbamidomethylation	62059.5	Inositol 1,4,5-trisphosphate receptor-interacting protein OS=Homo sapiens OX=9606 GN=ITPRIP PE=1 SV=1
1814	TRUE	P25685|DNJB1_HUMAN	164.366	5	4		9	9	1	12	12	1	13	13		27	27		8	8	1	9	9	Carbamidomethylation	38044.1	DnaJ homolog subfamily B member 1 OS=Homo sapiens OX=9606 GN=DNAJB1 PE=1 SV=4
2631	TRUE	O95169|NDUB8_HUMAN	108.783	2	2		9	9		8	8		5	5		6	6		4	4		6	6		21765.7	NADH dehydrogenase [ubiquinone] 1 beta subcomplex subunit 8, mitochondrial OS=Homo sapiens OX=9606 GN=NDUFB8 PE=1 SV=1
821	FALSE	Q8NEV1|CSK23_HUMAN	239.666	10	10	1	9	9		29	29	1	3	3	1	33	33	7	29	4.14286	4	21	5.25		45219.7	Casein kinase II subunit alpha 3 OS=Homo sapiens OX=9606 GN=CSNK2A3 PE=1 SV=2
1186	TRUE	Q96PY5|FMNL2_HUMAN	215.493	13	6		9	9	6	42	7		1	1	1	10	10	5	19	3.8	5	22	4.4	Carbamidomethylation	123321	Formin-like protein 2 OS=Homo sapiens OX=9606 GN=FMNL2 PE=1 SV=3
821	TRUE	P68400|CSK21_HUMAN	251.158	12	12	1	9	9		39	39	1	3	3	1	35	35	7	40	5.71429	8	33	4.125		45143.6	Casein kinase II subunit alpha OS=Homo sapiens OX=9606 GN=CSNK2A1 PE=1 SV=1
2458	TRUE	O43298|ZBT43_HUMAN	119.49	3	3		9	9		6	6					4	4		4	4		4	4	Carbamidomethylation	52630.5	Zinc finger and BTB domain-containing protein 43 OS=Homo sapiens OX=9606 GN=ZBTB43 PE=1 SV=1
1907	TRUE	P33947|ERD22_HUMAN	159.108	4	4		9	9	11	17	1.54545	3			3	1	0.333333		6	6	5	9	1.8		24421.9	ER lumen protein-retaining receptor 2 OS=Homo sapiens OX=9606 GN=KDELR2 PE=1 SV=1
2506	FALSE	A0A024RBG1|NUD4B_HUMAN	96.2522	1	1		3	3		5	5		4	4		12	12		10	10		15	15		20434.2	Diphosphoinositol polyphosphate phosphohydrolase NUDT4B OS=Homo sapiens OX=9606 GN=NUDT4B PE=3 SV=1
2256	TRUE	Q6PIJ6|FBX38_HUMAN	135.156	4	4		9	9		7	7								4	4		1	1		133944	F-box only protein 38 OS=Homo sapiens OX=9606 GN=FBXO38 PE=1 SV=3
2763	TRUE	P43003|EAA1_HUMAN	100.291	2	2	2	18	9		21	21							4	13	3.25	10	7	0.7		59572.3	Excitatory amino acid transporter 1 OS=Homo sapiens OX=9606 GN=SLC1A3 PE=1 SV=1
422	TRUE	Q04695|K1C17_HUMAN	302.069	33	7	7	60	8.57143	85	3	0.0352941	22	13	0.590909	11	4	0.363636	31	26	0.83871	57	190	3.33333	Oxidation (M)	48105.7	Keratin, type I cytoskeletal 17 OS=Homo sapiens OX=9606 GN=KRT17 PE=1 SV=2
2440	TRUE	O15554|KCNN4_HUMAN	120.818	2	2	2	17	8.5	1	23	23		16	16		16	16		9	9		8	8	Carbamidomethylation	47695.5	Intermediate conductance calcium-activated potassium channel protein 4 OS=Homo sapiens OX=9606 GN=KCNN4 PE=1 SV=1
483	TRUE	O15031|PLXB2_HUMAN	293.632	23	23	3	25	8.33333	6	104	17.3333	1	1	1	1	61	61	4	16	4	6	32	5.33333	Carbamidomethylation	205127	Plexin-B2 OS=Homo sapiens OX=9606 GN=PLXNB2 PE=1 SV=3
616	TRUE	P06858|LIPL_HUMAN	275.256	12	12	7	57	8.14286		68	68	1	64	64		64	64	12	77	6.41667	8	53	6.625	Carbamidomethylation	53162.5	Lipoprotein lipase OS=Homo sapiens OX=9606 GN=LPL PE=1 SV=1
1191	TRUE	Q9NQ25|SLAF7_HUMAN	215.328	9	9		8	8		55	55		1	1		33	33		11	11	1	30	30	Carbamidomethylation	37420.9	SLAM family member 7 OS=Homo sapiens OX=9606 GN=SLAMF7 PE=1 SV=1
424	TRUE	P04233|HG2A_HUMAN	301.713	16	16	5	40	8	18	325	18.0556	5	35	7	23	496	21.5652		53	53	7	170	24.2857	Carbamidomethylation; Oxidation (M)	33515.6	HLA class II histocompatibility antigen gamma chain OS=Homo sapiens OX=9606 GN=CD74 PE=1 SV=3
1413	TRUE	P21580|TNAP3_HUMAN	197.28	10	10		8	8		37	37					7	7		7	7		18	18	Carbamidomethylation	89614	Tumor necrosis factor alpha-induced protein 3 OS=Homo sapiens OX=9606 GN=TNFAIP3 PE=1 SV=1
2185	TRUE	O15121|DEGS1_HUMAN	140.176	3	3		8	8	3	14	4.66667					6	6					9	9		37866	Sphingolipid delta(4)-desaturase DES1 OS=Homo sapiens OX=9606 GN=DEGS1 PE=1 SV=1
1860	TRUE	O95551|TYDP2_HUMAN	161.325	5	5		8	8	1	19	19	4	6	1.5	1	16	16		6	6		8	8	Carbamidomethylation	40929.6	Tyrosyl-DNA phosphodiesterase 2 OS=Homo sapiens OX=9606 GN=TDP2 PE=1 SV=1
1508	TRUE	O95477|ABCA1_HUMAN	189.238	9	9		8	8		46	46					10	10					6	6		254302	Phospholipid-transporting ATPase ABCA1 OS=Homo sapiens OX=9606 GN=ABCA1 PE=1 SV=3
1840	TRUE	P37268|FDFT_HUMAN	162.606	4	4	1	8	8		11	11					6	6	2	11	5.5		4	4	Carbamidomethylation	48115.3	Squalene synthase OS=Homo sapiens OX=9606 GN=FDFT1 PE=1 SV=1
1140	TRUE	P53634|CATC_HUMAN	220.502	7	7		8	8	18	19	1.05556	1	1	1	7	21	3	1	1	1	2	6	3	Carbamidomethylation; Oxidation (M)	51853.8	Dipeptidyl peptidase 1 OS=Homo sapiens OX=9606 GN=CTSC PE=1 SV=2
1430	TRUE	Q86WA9|S2611_HUMAN	195.368	9	9	3	24	8	14	21	1.5		1	1		3	3	11	15	1.36364	13	11	0.846154		65299	Sodium-independent sulfate anion transporter OS=Homo sapiens OX=9606 GN=SLC26A11 PE=1 SV=2
2456	TRUE	Q16134|ETFD_HUMAN	119.723	3	3		8	8	5	12	2.4							5	11	2.2	10	7	0.7	Carbamidomethylation	68495.4	Electron transfer flavoprotein-ubiquinone oxidoreductase, mitochondrial OS=Homo sapiens OX=9606 GN=ETFDH PE=1 SV=2
1862	TRUE	Q01581|HMCS1_HUMAN	161.301	6	6	3	24	8	3	16	5.33333		3	3		7	7		5	5				Carbamidomethylation	57293.6	Hydroxymethylglutaryl-CoA synthase, cytoplasmic OS=Homo sapiens OX=9606 GN=HMGCS1 PE=1 SV=2
130	TRUE	Q8IV08|PLD3_HUMAN	376.998	27	27	28	218	7.78571	27	330	12.2222	16	124	7.75	11	262	23.8182	44	290	6.59091	29	365	12.5862	Carbamidomethylation; Oxidation (M)	54705.3	5'-3' exonuclease PLD3 OS=Homo sapiens OX=9606 GN=PLD3 PE=1 SV=1
1317	TRUE	P30876|RPB2_HUMAN	204.127	9	9	3	23	7.66667	5	31	6.2		3	3		1	1	2	22	11		19	19	Carbamidomethylation	133897	DNA-directed RNA polymerase II subunit RPB2 OS=Homo sapiens OX=9606 GN=POLR2B PE=1 SV=1
518	TRUE	P46379|BAG6_HUMAN	289.76	15	15	4	30	7.5	7	101	14.4286	1	22	22		57	57	6	23	3.83333	1	30	30	Carbamidomethylation	119409	Large proline-rich protein BAG6 OS=Homo sapiens OX=9606 GN=BAG6 PE=1 SV=2
1855	TRUE	O14735|CDIPT_HUMAN	161.683	4	4	2	15	7.5	14	9	0.642857	1	2	2		5	5	10	14	1.4		18	18		23538.8	CDP-diacylglycerol--inositol 3-phosphatidyltransferase OS=Homo sapiens OX=9606 GN=CDIPT PE=1 SV=1
797	TRUE	Q7Z794|K2C1B_HUMAN	252.585	18	7	14	104	7.42857	167	7	0.0419162	22	11	0.5	25	7	0.28	86	22	0.255814	97	151	1.5567	Oxidation (M)	61901.4	Keratin, type II cytoskeletal 1b OS=Homo sapiens OX=9606 GN=KRT77 PE=1 SV=3
509	TRUE	P14923|PLAK_HUMAN	290.811	16	16	3	22	7.33333	123									21	17	0.809524	14	43	3.07143	Oxidation (M)	81744.7	Junction plakoglobin OS=Homo sapiens OX=9606 GN=JUP PE=1 SV=3
967	TRUE	O75487|GPC4_HUMAN	235.958	13	13		7	7		33	33		41	41		63	63		18	18	1	45	45	Carbamidomethylation	62412.1	Glypican-4 OS=Homo sapiens OX=9606 GN=GPC4 PE=1 SV=4
1912	TRUE	O60462|NRP2_HUMAN	158.337	5	5		7	7		25	25		8	8		12	12		19	19		14	14		104831	Neuropilin-2 OS=Homo sapiens OX=9606 GN=NRP2 PE=1 SV=3
1372	TRUE	Q13133|NR1H3_HUMAN	200.223	9	9		7	7		22	22		37	37	1	45	45		15	15		13	13	Carbamidomethylation	50395.8	Oxysterols receptor LXR-alpha OS=Homo sapiens OX=9606 GN=NR1H3 PE=1 SV=2
1810	TRUE	Q8WVT3|TPC12_HUMAN	164.501	7	7		7	7		16	16								2	2		11	11		79375.1	Trafficking protein particle complex subunit 12 OS=Homo sapiens OX=9606 GN=TRAPPC12 PE=1 SV=3
1653	TRUE	Q15438|CYH1_HUMAN	176.027	7	7		7	7	1	35	35		5	5	1	10	10	3	16	5.33333	2	18	9	Carbamidomethylation	46412.7	Cytohesin-1 OS=Homo sapiens OX=9606 GN=CYTH1 PE=1 SV=1
970	TRUE	P26232|CTNA2_HUMAN	235.748	8	1	1	34	34	2	72	36		26	26		52	52	4	31	7.75	4	48	12	Oxidation (M); Carbamidomethylation	105313	Catenin alpha-2 OS=Homo sapiens OX=9606 GN=CTNNA2 PE=1 SV=5
2571	TRUE	Q9NPQ8|RIC8A_HUMAN	112.339	4	4		7	7		10	10	1							3	3	1	5	5		59709.5	Synembryn-A OS=Homo sapiens OX=9606 GN=RIC8A PE=1 SV=3
2805	TRUE	Q969S3|ZN622_HUMAN	97.3927	1	1					5	5								4	4		12	12		54272	Zinc finger protein 622 OS=Homo sapiens OX=9606 GN=ZNF622 PE=1 SV=1
496	TRUE	Q02413|DSG1_HUMAN	292.488	20	20		7	7	123			59			47			23	7	0.304348	15	44	2.93333	Oxidation (M)	113748	Desmoglein-1 OS=Homo sapiens OX=9606 GN=DSG1 PE=1 SV=2
1802	TRUE	Q8IVF7|FMNL3_HUMAN	164.895	7	2		7	7	3	16	5.33333		1	1	1	8	8	3	10	3.33333	3	8	2.66667		117213	Formin-like protein 3 OS=Homo sapiens OX=9606 GN=FMNL3 PE=1 SV=3
1945	TRUE	Q9NUT2|MITOS_HUMAN	155.932	3	3		7	7	3	4	1.33333							7	13	1.85714	5	13	2.6		79988.8	Mitochondrial potassium channel ATP-binding subunit OS=Homo sapiens OX=9606 GN=ABCB8 PE=1 SV=3
2017	TRUE	Q8TD19|NEK9_HUMAN	150.45	4	4	1	7	7	14	18	1.28571				1	2	2	14	21	1.5	7	15	2.14286		107168	Serine/threonine-protein kinase Nek9 OS=Homo sapiens OX=9606 GN=NEK9 PE=1 SV=2
3246	TRUE	O94985|CSTN1_HUMAN	69.0015	1	1		1	1		4	4								2	2		12	12		109793	Calsyntenin-1 OS=Homo sapiens OX=9606 GN=CLSTN1 PE=1 SV=1
3512	TRUE	O75509|TNR21_HUMAN	55.4722	1	1		1	1		1	1								2	2		12	12		71844.9	Tumor necrosis factor receptor superfamily member 21 OS=Homo sapiens OX=9606 GN=TNFRSF21 PE=1 SV=1
417	FALSE	Q8N8J0|PI4P1_HUMAN	129.763	4	4	2	14	7		23	23								1	1		2	2	Carbamidomethylation	29178.6	Putative inactive phosphatidylinositol 4-kinase alpha-like protein P1 OS=Homo sapiens OX=9606 GN=PI4KAP1 PE=5 SV=1
2283	TRUE	P49815|TSC2_HUMAN	133.239	6	6		7	7		8	8					1	1		1	1		1	1		200608	Tuberin OS=Homo sapiens OX=9606 GN=TSC2 PE=1 SV=2
2074	TRUE	Q10713|MPPA_HUMAN	147.069	4	4		7	7	5	8	1.6							11	11	1	11	8	0.727273	Carbamidomethylation	58252.9	Mitochondrial-processing peptidase subunit alpha OS=Homo sapiens OX=9606 GN=PMPCA PE=1 SV=2
147	TRUE	P01023|A2MG_HUMAN	370.578	44	44	18	120	6.66667	27	256	9.48148	2	22	11	1	66	66	18	113	6.27778	14	136	9.71429	Carbamidomethylation	163291	Alpha-2-macroglobulin OS=Homo sapiens OX=9606 GN=A2M PE=1 SV=3
1827	TRUE	Q9BSJ2|GCP2_HUMAN	163.632	8	8	2	13	6.5	3	4	1.33333				1	1	1	2	6	3	1	8	8		102534	Gamma-tubulin complex component 2 OS=Homo sapiens OX=9606 GN=TUBGCP2 PE=1 SV=2
3359	TRUE	Q9H295|DCSTP_HUMAN	63.4212	1	1														8	8		11	11		53392.6	Dendritic cell-specific transmembrane protein OS=Homo sapiens OX=9606 GN=DCSTAMP PE=1 SV=1
3352	TRUE	Q9HBR0|S38AA_HUMAN	63.8853	1	1		1	1		4	4					7	7	1	7	7	1	11	11		119762	Putative sodium-coupled neutral amino acid transporter 10 OS=Homo sapiens OX=9606 GN=SLC38A10 PE=1 SV=2
1153	TRUE	Q9H7F0|AT133_HUMAN	218.436	14	14	5	32	6.4	2	38	19	5	9	1.8				10	21	2.1	1	9	9	Carbamidomethylation	138043	Probable cation-transporting ATPase 13A3 OS=Homo sapiens OX=9606 GN=ATP13A3 PE=1 SV=4
1287	TRUE	P49754|VPS41_HUMAN	206.307	9	9	4	25	6.25	14	37	2.64286					2	2	12	25	2.08333	8	19	2.375	Carbamidomethylation	98566.1	Vacuolar protein sorting-associated protein 41 homolog OS=Homo sapiens OX=9606 GN=VPS41 PE=1 SV=3
1973	TRUE	Q9BW60|ELOV1_HUMAN	154.014	3	3	4	25	6.25	5	14	2.8	8	13	1.625		8	8	7	7	1	7	4	0.571429	Carbamidomethylation	32662.7	Elongation of very long chain fatty acids protein 1 OS=Homo sapiens OX=9606 GN=ELOVL1 PE=1 SV=1
1882	TRUE	Q86VX2|COMD7_HUMAN	160.345	3	3		6	6	1	13	13		5	5		13	13		20	20		25	25		22540	COMM domain-containing protein 7 OS=Homo sapiens OX=9606 GN=COMMD7 PE=1 SV=2
1080	TRUE	P54802|ANAG_HUMAN	225.443	11	11		6	6	2	54	27		1	1		8	8	3	21	7		19	19		82265.7	Alpha-N-acetylglucosaminidase OS=Homo sapiens OX=9606 GN=NAGLU PE=1 SV=2
1749	TRUE	Q9H3M7|TXNIP_HUMAN	168.248	5	5		6	6		23	23					28	28		16	16		17	17	Carbamidomethylation	43661.4	Thioredoxin-interacting protein OS=Homo sapiens OX=9606 GN=TXNIP PE=1 SV=1
1036	TRUE	Q8IY21|DDX60_HUMAN	229.027	20	18		6	6	21	83	3.95238					2	2				1	13	13	Carbamidomethylation	197853	Probable ATP-dependent RNA helicase DDX60 OS=Homo sapiens OX=9606 GN=DDX60 PE=1 SV=3
1733	TRUE	Q99523|SORT_HUMAN	170.046	4	4	1	6	6	1	15	15								2	2	1	12	12	Carbamidomethylation	92067.7	Sortilin OS=Homo sapiens OX=9606 GN=SORT1 PE=1 SV=3
1598	TRUE	Q2VPB7|AP5B1_HUMAN	181.453	6	6	1	6	6	2	23	11.5					1	1		6	6		11	11	Carbamidomethylation	93949.4	AP-5 complex subunit beta-1 OS=Homo sapiens OX=9606 GN=AP5B1 PE=1 SV=4
2752	TRUE	P55061|BI1_HUMAN	100.715	2	2		6	6		26	26		15	15		26	26		16	16		9	9		26537.7	Bax inhibitor 1 OS=Homo sapiens OX=9606 GN=TMBIM6 PE=1 SV=2
1521	FALSE	Q9H0M0|WWP1_HUMAN	90.8817	2	2	1	6	6		8	8		1	1		6	6	2	4	2		8	8	Carbamidomethylation	105202	NEDD4-like E3 ubiquitin-protein ligase WWP1 OS=Homo sapiens OX=9606 GN=WWP1 PE=1 SV=1
1523	TRUE	Q9NRW7|VPS45_HUMAN	188.001	8	8		6	6	3	33	11		1	1		6	6		26	26	5	35	7		65076.9	Vacuolar protein sorting-associated protein 45 OS=Homo sapiens OX=9606 GN=VPS45 PE=1 SV=1
2634	TRUE	Q86Y37|CACL1_HUMAN	108.692	3	3		6	6		16	16		2	2		6	6		8	8		7	7	Carbamidomethylation	41063.8	CDK2-associated and cullin domain-containing protein 1 OS=Homo sapiens OX=9606 GN=CACUL1 PE=1 SV=1
1826	TRUE	Q96F46|I17RA_HUMAN	163.699	7	7		6	6	1	26	26					6	6		1	1		6	6	Carbamidomethylation	96122.4	Interleukin-17 receptor A OS=Homo sapiens OX=9606 GN=IL17RA PE=1 SV=2
1890	TRUE	Q9ULK4|MED23_HUMAN	159.851	5	5	1	6	6	1	25	25					2	2		3	3		5	5		156474	Mediator of RNA polymerase II transcription subunit 23 OS=Homo sapiens OX=9606 GN=MED23 PE=1 SV=2
2408	TRUE	Q13118|KLF10_HUMAN	122.474	3	3		6	6		7	7					2	2		7	7		4	4	Carbamidomethylation	52555.2	Krueppel-like factor 10 OS=Homo sapiens OX=9606 GN=KLF10 PE=1 SV=1
2503	TRUE	Q8IWJ2|GCC2_HUMAN	116.436	5	5	1	6	6	9	11	1.22222							2	1	0.5	1	4	4	Carbamidomethylation	195910	GRIP and coiled-coil domain-containing protein 2 OS=Homo sapiens OX=9606 GN=GCC2 PE=1 SV=4
1876	TRUE	Q6NVY1|HIBCH_HUMAN	160.717	5	5	1	6	6	1	8	8					1	1	16	14	0.875	6	14	2.33333		43482.3	3-hydroxyisobutyryl-CoA hydrolase, mitochondrial OS=Homo sapiens OX=9606 GN=HIBCH PE=1 SV=2
2699	TRUE	Q9UDY8|MALT1_HUMAN	103.796	3	3		6	6	2	5	2.5							1	2	2		2	2		92272.4	Mucosa-associated lymphoid tissue lymphoma translocation protein 1 OS=Homo sapiens OX=9606 GN=MALT1 PE=1 SV=1
2678	TRUE	Q9NX57|RAB20_HUMAN	105.819	3	3		6	6	2	9	4.5				2	3	1.5				2	4	2		26277	Ras-related protein Rab-20 OS=Homo sapiens OX=9606 GN=RAB20 PE=1 SV=1
127	TRUE	P13647|K2C5_HUMAN	377.889	57	31	22	132	6	435	19	0.0436782	46	19	0.413043	43	27	0.627907	92	81	0.880435	153	291	1.90196	Oxidation (M)	62378.3	Keratin, type II cytoskeletal 5 OS=Homo sapiens OX=9606 GN=KRT5 PE=1 SV=3
2821	TRUE	Q86VR2|RETR3_HUMAN	97.0457	2	2	1	6	6	7	5	0.714286					2	2	10	7	0.7	5	8	1.6		51396.2	Reticulophagy regulator 3 OS=Homo sapiens OX=9606 GN=RETREG3 PE=1 SV=1
2769	TRUE	Q8TCS8|PNPT1_HUMAN	99.7792	2	2		6	6	1	1	1							6	4	0.666667	4	6	1.5	Carbamidomethylation	85950.6	Polyribonucleotide nucleotidyltransferase 1, mitochondrial OS=Homo sapiens OX=9606 GN=PNPT1 PE=1 SV=2
3014	TRUE	Q9NYY8|FAKD2_HUMAN	84.091	1	1		4	4		7	7								6	6		10	10		81462.9	FAST kinase domain-containing protein 2, mitochondrial OS=Homo sapiens OX=9606 GN=FASTKD2 PE=1 SV=1
2572	TRUE	P52701|MSH6_HUMAN	112.312	3	3		6	6	1	2	2							1	5	5		1	1		152786	DNA mismatch repair protein Msh6 OS=Homo sapiens OX=9606 GN=MSH6 PE=1 SV=2
1472	TRUE	Q8IWB9|TEX2_HUMAN	192.164	10	10	3	18	6		2	2							14	31	2.21429	5	4	0.8	Carbamidomethylation	125303	Testis-expressed protein 2 OS=Homo sapiens OX=9606 GN=TEX2 PE=1 SV=2
2568	TRUE	Q9NRW3|ABC3C_HUMAN	112.435	3	3		6	6	4	10	2.5	1				2	2		4	4				Carbamidomethylation	22825.9	DNA dC->dU-editing enzyme APOBEC-3C OS=Homo sapiens OX=9606 GN=APOBEC3C PE=1 SV=2
2567	TRUE	Q9NXR7|BABA2_HUMAN	112.463	2	2		6	6	4			2			1			8	5	0.625	8			Carbamidomethylation	43551.7	BRISC and BRCA1-A complex member 2 OS=Homo sapiens OX=9606 GN=BABAM2 PE=1 SV=2
2659	TRUE	O75832|PSD10_HUMAN	107.207	2	2	1	6	6	6	14	2.33333		8	8	3	17	5.66667								24427.8	26S proteasome non-ATPase regulatory subunit 10 OS=Homo sapiens OX=9606 GN=PSMD10 PE=1 SV=1
1774	TRUE	Q8NBK3|SUMF1_HUMAN	166.908	5	5	2	11	5.5		24	24		12	12		9	9		15	15		18	18	Carbamidomethylation	40556.4	Formylglycine-generating enzyme OS=Homo sapiens OX=9606 GN=SUMF1 PE=1 SV=3
405	TRUE	P07602|SAP_HUMAN	304.294	19	19	13	70	5.38462	23	144	6.26087	19	76	4	4	103	25.75	9	53	5.88889	23	109	4.73913	Carbamidomethylation; Oxidation (M)	58112.6	Prosaposin OS=Homo sapiens OX=9606 GN=PSAP PE=1 SV=2
617	TRUE	A0AV96|RBM47_HUMAN	275.172	18	18	4	21	5.25	13	76	5.84615		10	10	14	94	6.71429	7	35	5	4	83	20.75	Carbamidomethylation; Oxidation (M)	64099.1	RNA-binding protein 47 OS=Homo sapiens OX=9606 GN=RBM47 PE=1 SV=2
1547	TRUE	Q8WWI5|CTL1_HUMAN	185.83	6	6	1	5	5		30	30		2	2	1	23	23	1	9	9		38	38	Carbamidomethylation	73302.1	Choline transporter-like protein 1 OS=Homo sapiens OX=9606 GN=SLC44A1 PE=1 SV=1
1310	TRUE	Q9H7D7|WDR26_HUMAN	204.382	8	8	2	10	5	1	25	25							2	22	11		21	21	Carbamidomethylation	72124	WD repeat-containing protein 26 OS=Homo sapiens OX=9606 GN=WDR26 PE=1 SV=3
1370	TRUE	P15291|B4GT1_HUMAN	200.373	7	7		5	5		33	33		6	6		9	9		14	14		17	17		43920.3	Beta-1,4-galactosyltransferase 1 OS=Homo sapiens OX=9606 GN=B4GALT1 PE=1 SV=5
1190	TRUE	P98194|AT2C1_HUMAN	215.355	9	9	1	5	5	4	35	8.75					6	6	2	19	9.5	1	15	15	Carbamidomethylation	100577	Calcium-transporting ATPase type 2C member 1 OS=Homo sapiens OX=9606 GN=ATP2C1 PE=1 SV=3
2502	TRUE	Q96I24|FUBP3_HUMAN	116.455	3	3	1	5	5	1	5	5		1	1				3	4	1.33333		9	9		61640.4	Far upstream element-binding protein 3 OS=Homo sapiens OX=9606 GN=FUBP3 PE=1 SV=2
2852	TRUE	Q8ND04|SMG8_HUMAN	94.8968	2	2	1	5	5		10	10	2	2	1		8	8	2	7	3.5		7	7		109684	Protein SMG8 OS=Homo sapiens OX=9606 GN=SMG8 PE=1 SV=1
1592	TRUE	Q7Z3C6|ATG9A_HUMAN	182.03	7	7	1	5	5	3	14	4.66667		1	1		1	1		16	16		6	6	Carbamidomethylation	94447.1	Autophagy-related protein 9A OS=Homo sapiens OX=9606 GN=ATG9A PE=1 SV=3
2542	TRUE	Q96EE3|SEH1_HUMAN	113.859	2	2		5	5	1	10	10							2	7	3.5	1	6	6		39648.6	Nucleoporin SEH1 OS=Homo sapiens OX=9606 GN=SEH1L PE=1 SV=3
2227	TRUE	P42338|PK3CB_HUMAN	137.342	4	4	1	5	5		7	7							2	3	1.5	2	11	5.5	Carbamidomethylation	122762	Phosphatidylinositol 4,5-bisphosphate 3-kinase catalytic subunit beta isoform OS=Homo sapiens OX=9606 GN=PIK3CB PE=1 SV=1
2409	TRUE	Q9Y6X5|ENPP4_HUMAN	122.451	4	4		5	5		9	9		5	5		10	10		2	2		5	5	Carbamidomethylation	51641.1	Bis(5'-adenosyl)-triphosphatase ENPP4 OS=Homo sapiens OX=9606 GN=ENPP4 PE=1 SV=3
675	TRUE	Q86YZ3|HORN_HUMAN	265.976	17	17		5	5	4			2			26			2			2	10	5		282390	Hornerin OS=Homo sapiens OX=9606 GN=HRNR PE=1 SV=2
2187	TRUE	Q8NHP8|PLBL2_HUMAN	140.013	4	4	1	5	5	1	11	11	2				1	1	10	17	1.7	2	9	4.5	Carbamidomethylation	65471.8	Putative phospholipase B-like 2 OS=Homo sapiens OX=9606 GN=PLBD2 PE=1 SV=2
2320	TRUE	Q9BXX0|EMIL2_HUMAN	129.86	6	6	1	5	5		10	10								9	9		4	4	Carbamidomethylation	115687	EMILIN-2 OS=Homo sapiens OX=9606 GN=EMILIN2 PE=1 SV=3
2920	TRUE	P42081|CD86_HUMAN	90.3798	2	2		5	5		4	4		5	5		4	4		3	3		4	4	Carbamidomethylation	37682.3	T-lymphocyte activation antigen CD86 OS=Homo sapiens OX=9606 GN=CD86 PE=1 SV=2
2129	TRUE	Q9C0H2|TTYH3_HUMAN	143.92	3	3		5	5		8	8								3	3	1	3	3		57544.7	Protein tweety homolog 3 OS=Homo sapiens OX=9606 GN=TTYH3 PE=1 SV=3
2181	TRUE	P55899|FCGRN_HUMAN	140.567	5	5		5	5		6	6					3	3	8	14	1.75	7	17	2.42857		39743.3	IgG receptor FcRn large subunit p51 OS=Homo sapiens OX=9606 GN=FCGRT PE=1 SV=1
2774	TRUE	A1A4S6|RHG10_HUMAN	99.57	2	2	1	5	5	2	7	3.5							1	2	2		2	2		89374.6	Rho GTPase-activating protein 10 OS=Homo sapiens OX=9606 GN=ARHGAP10 PE=1 SV=1
2850	TRUE	Q9UPT5|EXOC7_HUMAN	95.0368	3	3		5	5	1	4	4								1	1		2	2		83381.9	Exocyst complex component 7 OS=Homo sapiens OX=9606 GN=EXOC7 PE=1 SV=3
2620	TRUE	Q658Y4|F91A1_HUMAN	109.662	3	3		5	5	5	6	1.2							6	6	1	4	7	1.75		93909	Protein FAM91A1 OS=Homo sapiens OX=9606 GN=FAM91A1 PE=1 SV=3
2350	TRUE	Q9NSY1|BMP2K_HUMAN	127.013	4	3		5	5	2	9	4.5	1				1	1	7	13	1.85714	4	6	1.5	Carbamidomethylation	129172	BMP-2-inducible protein kinase OS=Homo sapiens OX=9606 GN=BMP2K PE=1 SV=2
1969	TRUE	Q96RF0|SNX18_HUMAN	154.306	4	4		5	5	10	14	1.4				3	6	2	4	7	1.75	4	6	1.5		68894.4	Sorting nexin-18 OS=Homo sapiens OX=9606 GN=SNX18 PE=1 SV=2
2428	TRUE	Q7Z3K3|POGZ_HUMAN	121.315	4	4		5	5		21	21					5	5		2	2		1	1		155344	Pogo transposable element with ZNF domain OS=Homo sapiens OX=9606 GN=POGZ PE=1 SV=2
2451	TRUE	P49137|MAPK2_HUMAN	119.947	3	1	6	13	2.16667	6	11	1.83333	5	10	2		12	12	4	5	1.25	1	9	9		45567.8	MAP kinase-activated protein kinase 2 OS=Homo sapiens OX=9606 GN=MAPKAPK2 PE=1 SV=1
1981	TRUE	Q96JJ7|TMX3_HUMAN	153.236	5	5	1	5	5		4	4	5	1	0.2				9	4	0.444444	6	6	1		51872	Protein disulfide-isomerase TMX3 OS=Homo sapiens OX=9606 GN=TMX3 PE=1 SV=2
3235	TRUE	P06756|ITAV_HUMAN	69.6394	2	2	1	5	5		4	4							1	2	2					116038	Integrin alpha-V OS=Homo sapiens OX=9606 GN=ITGAV PE=1 SV=2
2888	TRUE	P05386|RLA1_HUMAN	92.5585	2	2		5	5	3	9	3							2							11513.9	60S acidic ribosomal protein P1 OS=Homo sapiens OX=9606 GN=RPLP1 PE=1 SV=1
417	TRUE	P42356|PI4KA_HUMAN	302.657	30	30	18	89	4.94444	25	148	5.92		2	2		9	9	4	35	8.75	1	22	22	Carbamidomethylation	236830	Phosphatidylinositol 4-kinase alpha OS=Homo sapiens OX=9606 GN=PI4KA PE=1 SV=4
1005	TRUE	P24928|RPB1_HUMAN	232.142	17	17	5	23	4.6	11	79	7.18182		1	1					11	11		8	8	Carbamidomethylation	217176	DNA-directed RNA polymerase II subunit RPB1 OS=Homo sapiens OX=9606 GN=POLR2A PE=1 SV=2
81	TRUE	P02533|K1C14_HUMAN	401.933	57	24	40	183	4.575	576	31	0.0538194	34	15	0.441176	63	4	0.0634921	93	66	0.709677	131	387	2.9542	Oxidation (M)	51561.5	Keratin, type I cytoskeletal 14 OS=Homo sapiens OX=9606 GN=KRT14 PE=1 SV=4
680	FALSE	Q8N9B8|RGF1A_HUMAN	75.6219	1	1					2	2											9	9		54555.9	Ras-GEF domain-containing family member 1A OS=Homo sapiens OX=9606 GN=RASGEF1A PE=2 SV=2
1989	TRUE	Q8TCT8|SPP2A_HUMAN	152.47	5	5	2	9	4.5	6	20	3.33333		2	2	2	7	3.5	4	5	1.25		11	11	Carbamidomethylation	58143.2	Signal peptide peptidase-like 2A OS=Homo sapiens OX=9606 GN=SPPL2A PE=1 SV=2
2314	TRUE	Q9Y6I9|TX264_HUMAN	130.527	4	4	2	9	4.5	6	12	2	1	1	1		15	15	8	15	1.875		4	4	Carbamidomethylation	34188.6	Testis-expressed protein 264 OS=Homo sapiens OX=9606 GN=TEX264 PE=1 SV=1
1975	TRUE	Q7KZ85|SPT6H_HUMAN	153.933	8	8	2	9	4.5	1	15	15					1	1		1	1	1	4	4	Carbamidomethylation	199073	Transcription elongation factor SPT6 OS=Homo sapiens OX=9606 GN=SUPT6H PE=1 SV=2
1896	TRUE	Q6VY07|PACS1_HUMAN	159.407	6	6	2	9	4.5	1	12	12					2	2		2	2		2	2	Carbamidomethylation	104898	Phosphofurin acidic cluster sorting protein 1 OS=Homo sapiens OX=9606 GN=PACS1 PE=1 SV=2
2531	TRUE	Q8IWT6|LRC8A_HUMAN	114.606	4	3	2	9	4.5		18	18					3	3	1	5	5		1	1		94198.7	Volume-regulated anion channel subunit LRRC8A OS=Homo sapiens OX=9606 GN=LRRC8A PE=1 SV=1
2807	TRUE	Q9UBV8|PEF1_HUMAN	97.3306	2	2	2	9	4.5	5	8	1.6							4	9	2.25	13	7	0.538462		30380.9	Peflin OS=Homo sapiens OX=9606 GN=PEF1 PE=1 SV=1
1211	TRUE	P08727|K1C19_HUMAN	212.513	17	2	7	31	4.42857	48	2	0.0416667	4	13	3.25	3	4	1.33333	24	24	1	32	47	1.46875	Oxidation (M)	44106	Keratin, type I cytoskeletal 19 OS=Homo sapiens OX=9606 GN=KRT19 PE=1 SV=4
232	TRUE	P08779|K1C16_HUMAN	342.904	42	22	19	83	4.36842	257	20	0.077821	21	2	0.0952381	25			96	23	0.239583	79	269	3.40506	Oxidation (M)	51267.8	Keratin, type I cytoskeletal 16 OS=Homo sapiens OX=9606 GN=KRT16 PE=1 SV=4
1849	TRUE	Q9NVP1|DDX18_HUMAN	161.914	6	6	3	13	4.33333	7	12	1.71429	1	3	3	3	9	3	12	4	0.333333	4	19	4.75	Carbamidomethylation	75406.8	ATP-dependent RNA helicase DDX18 OS=Homo sapiens OX=9606 GN=DDX18 PE=1 SV=2
1053	TRUE	P27694|RFA1_HUMAN	228.108	9	9	6	26	4.33333	9	44	4.88889		1	1	3	10	3.33333	11	25	2.27273	14	25	1.78571		68138.2	Replication protein A 70 kDa DNA-binding subunit OS=Homo sapiens OX=9606 GN=RPA1 PE=1 SV=2
2431	TRUE	O00217|NDUS8_HUMAN	121.234	4	4	3	13	4.33333	9	4	0.444444		3	3		8	8		7	7	7	12	1.71429	Carbamidomethylation	23705.1	NADH dehydrogenase [ubiquinone] iron-sulfur protein 8, mitochondrial OS=Homo sapiens OX=9606 GN=NDUFS8 PE=1 SV=1
417	FALSE	A4QPH2|PI4P2_HUMAN	191.196	7	7	7	30	4.28571	5	53	10.6					6	6	1	8	8		3	3	Carbamidomethylation	66944.3	Putative phosphatidylinositol 4-kinase alpha-like protein P2 OS=Homo sapiens OX=9606 GN=PI4KAP2 PE=5 SV=3
1653	FALSE	O43739|CYH3_HUMAN	63.096	1	1		3	3		5	5		5	5	1	9	9	1	4	4	1	8	8		46348.6	Cytohesin-3 OS=Homo sapiens OX=9606 GN=CYTH3 PE=1 SV=2
3543	TRUE	Q14094|CCNI_HUMAN	54.2229	1	1					4	4					4	4		4	4		8	8	Carbamidomethylation	42557.4	Cyclin-I OS=Homo sapiens OX=9606 GN=CCNI PE=1 SV=1
1279	TRUE	Q8N122|RPTOR_HUMAN	206.974	10	10	8	33	4.125	10	44	4.4					2	2	7	5	0.714286		17	17	Carbamidomethylation	149038	Regulatory-associated protein of mTOR OS=Homo sapiens OX=9606 GN=RPTOR PE=1 SV=1
2427	TRUE	Q9H0A8|COMD4_HUMAN	121.318	3	3		4	4		10	10		1	1		9	9		14	14		16	16		21764.3	COMM domain-containing protein 4 OS=Homo sapiens OX=9606 GN=COMMD4 PE=1 SV=1
683	FALSE	Q12873|CHD3_HUMAN	146.01	4	4	3	12	4	5	17	3.4					1	1	9	8	0.888889	1	11	11		226592	Chromodomain-helicase-DNA-binding protein 3 OS=Homo sapiens OX=9606 GN=CHD3 PE=1 SV=3
2124	TRUE	P17947|SPI1_HUMAN	144.114	4	4	2	8	4		19	19		6	6		40	40		15	15		10	10		31083	Transcription factor PU.1 OS=Homo sapiens OX=9606 GN=SPI1 PE=1 SV=2
2533	TRUE	Q8WTW3|COG1_HUMAN	114.485	3	3	1	4	4	2	3	1.5							4	4	1	1	9	9		108978	Conserved oligomeric Golgi complex subunit 1 OS=Homo sapiens OX=9606 GN=COG1 PE=1 SV=1
3253	TRUE	Q9Y314|NOSIP_HUMAN	68.6027	1	1		1	1	2	11	5.5		3	3		19	19		2	2		8	8		33172	Nitric oxide synthase-interacting protein OS=Homo sapiens OX=9606 GN=NOSIP PE=1 SV=1
2031	TRUE	O95759|TBCD8_HUMAN	150.017	5	5	3	12	4	2	8	4							1	1	1		8	8		130835	TBC1 domain family member 8 OS=Homo sapiens OX=9606 GN=TBC1D8 PE=1 SV=3
683	FALSE	Q8TDI0|CHD5_HUMAN	181.285	6	6	2	8	4		19	19					8	8	1	9	9	1	6	6	Carbamidomethylation	223050	Chromodomain-helicase-DNA-binding protein 5 OS=Homo sapiens OX=9606 GN=CHD5 PE=1 SV=1
2297	TRUE	Q5J8M3|EMC4_HUMAN	131.644	3	3	2	8	4	4	5	1.25		3	3		10	10		8	8		6	6		20086.6	ER membrane protein complex subunit 4 OS=Homo sapiens OX=9606 GN=EMC4 PE=1 SV=2
2009	TRUE	Q9UJV9|DDX41_HUMAN	151.017	5	5		4	4	1	7	7		3	3		5	5		5	5	2	12	6		69837.6	Probable ATP-dependent RNA helicase DDX41 OS=Homo sapiens OX=9606 GN=DDX41 PE=1 SV=2
2346	TRUE	Q8TBX8|PI42C_HUMAN	127.658	4	4		4	4				1	4	4	1	1	1	1				6	6		47299.9	Phosphatidylinositol 5-phosphate 4-kinase type-2 gamma OS=Homo sapiens OX=9606 GN=PIP4K2C PE=1 SV=3
2122	TRUE	Q8IWV7|UBR1_HUMAN	144.203	8	8		4	4	3	10	3.33333							1	4	4		5	5	Carbamidomethylation	200211	E3 ubiquitin-protein ligase UBR1 OS=Homo sapiens OX=9606 GN=UBR1 PE=1 SV=1
3047	TRUE	Q8WTV0|SCRB1_HUMAN	82.1189	2	2		4	4		2	2		1	1					6	6		4	4		60877.9	Scavenger receptor class B member 1 OS=Homo sapiens OX=9606 GN=SCARB1 PE=1 SV=1
1470	TRUE	O95140|MFN2_HUMAN	192.358	10	10	3	12	4	1	28	28	1	7	7		22	22	7	8	1.14286	2	8	4	Carbamidomethylation	86402.1	Mitofusin-2 OS=Homo sapiens OX=9606 GN=MFN2 PE=1 SV=3
3332	TRUE	Q17RY0|CPEB4_HUMAN	64.6078	1	1					5	5							2	2	1		8	8	Carbamidomethylation	80152	Cytoplasmic polyadenylation element-binding protein 4 OS=Homo sapiens OX=9606 GN=CPEB4 PE=1 SV=1
3332	TRUE	Q8NE35|CPEB3_HUMAN	64.6078	1	1					5	5							2	2	1		8	8	Carbamidomethylation	76014.3	Cytoplasmic polyadenylation element-binding protein 3 OS=Homo sapiens OX=9606 GN=CPEB3 PE=1 SV=2
3332	TRUE	Q7Z5Q1|CPEB2_HUMAN	64.6078	1	1					5	5							2	2	1		8	8	Carbamidomethylation	64944.2	Cytoplasmic polyadenylation element-binding protein 2 OS=Homo sapiens OX=9606 GN=CPEB2 PE=2 SV=3
2172	TRUE	Q9BVP2|GNL3_HUMAN	141.063	4	4	1	4	4	2	1	0.5							8	7	0.875	3	10	3.33333		61993.2	Guanine nucleotide-binding protein-like 3 OS=Homo sapiens OX=9606 GN=GNL3 PE=1 SV=2
3219	TRUE	O14495|PLPP3_HUMAN	70.4878	2	2		4	4	1	7	7					4	4		3	3	1	3	3		35116	Phospholipid phosphatase 3 OS=Homo sapiens OX=9606 GN=PLPP3 PE=1 SV=1
2759	TRUE	Q96CW5|GCP3_HUMAN	100.516	2	2		4	4	3	7	2.33333							3	1	0.333333		3	3		103571	Gamma-tubulin complex component 3 OS=Homo sapiens OX=9606 GN=TUBGCP3 PE=1 SV=2
3003	TRUE	Q9UI26|IPO11_HUMAN	84.7134	3	3	1	4	4	4	2	0.5							1				3	3		112535	Importin-11 OS=Homo sapiens OX=9606 GN=IPO11 PE=1 SV=1
1256	TRUE	O14976|GAK_HUMAN	208.916	9	9	9	36	4	8	43	5.375					2	2	5	21	4.2	5	14	2.8	Carbamidomethylation	143191	Cyclin-G-associated kinase OS=Homo sapiens OX=9606 GN=GAK PE=1 SV=2
2906	TRUE	Q86T03|PP4P1_HUMAN	91.5497	2	2		4	4	7	8	1.14286								4	4	3	7	2.33333	Carbamidomethylation	29469.6	Type 1 phosphatidylinositol 4,5-bisphosphate 4-phosphatase OS=Homo sapiens OX=9606 GN=PIP4P1 PE=1 SV=1
2326	TRUE	Q9H9E3|COG4_HUMAN	129.492	5	5		4	4	2	4	2								3	3		2	2		89083.1	Conserved oligomeric Golgi complex subunit 4 OS=Homo sapiens OX=9606 GN=COG4 PE=1 SV=3
1866	TRUE	Q9Y5X2|SNX8_HUMAN	161.091	9	9		4	4	3	17	5.66667	2	3	1.5		14	14	3	7	2.33333	7	14	2	Carbamidomethylation	52569.4	Sorting nexin-8 OS=Homo sapiens OX=9606 GN=SNX8 PE=1 SV=1
2553	TRUE	Q96PE3|INP4A_HUMAN	113.42	3	3		4	4	1	8	8							1	1	1		2	2		109956	Inositol polyphosphate-4-phosphatase type I A OS=Homo sapiens OX=9606 GN=INPP4A PE=1 SV=1
2377	TRUE	Q9UBN7|HDAC6_HUMAN	124.759	4	4		4	4		12	12		1	1		1	1					2	2	Carbamidomethylation	131419	Histone deacetylase 6 OS=Homo sapiens OX=9606 GN=HDAC6 PE=1 SV=2
1216	TRUE	Q969V3|NCLN_HUMAN	211.97	9	9	5	20	4	8	27	3.375	3	3	1		12	12	10	28	2.8	12	20	1.66667		62974.4	Nicalin OS=Homo sapiens OX=9606 GN=NCLN PE=1 SV=2
2654	TRUE	O75688|PPM1B_HUMAN	107.386	3	3	1	4	4	3	11	3.66667					1	1	7	7	1	7	10	1.42857		52642.6	Protein phosphatase 1B OS=Homo sapiens OX=9606 GN=PPM1B PE=1 SV=1
2789	TRUE	O43315|AQP9_HUMAN	98.5242	2	2	1	4	4	7	13	1.85714		1	1		2	2	4	11	2.75	4	5	1.25		31431.1	Aquaporin-9 OS=Homo sapiens OX=9606 GN=AQP9 PE=1 SV=2
2328	TRUE	Q5W0V3|F16B1_HUMAN	129.303	4	4	3	12	4	4	18	4.5					1	1		8	8		1	1		86558.3	Protein FAM160B1 OS=Homo sapiens OX=9606 GN=FAM160B1 PE=1 SV=1
2956	TRUE	Q96EY7|PTCD3_HUMAN	87.5571	2	2	1	4	4	1	7	7							3	2	0.666667	1	1	1		78549.7	Pentatricopeptide repeat domain-containing protein 3, mitochondrial OS=Homo sapiens OX=9606 GN=PTCD3 PE=1 SV=3
2732	TRUE	Q92552|RT27_HUMAN	101.838	2	2		4	4	1	7	7							5	1	0.2	1	1	1		47611.4	28S ribosomal protein S27, mitochondrial OS=Homo sapiens OX=9606 GN=MRPS27 PE=1 SV=3
2292	TRUE	Q9Y3A6|TMED5_HUMAN	131.935	4	4	1	4	4		7	7	3	9	3	2	6	3	18	13	0.722222	18	17	0.944444		26004.9	Transmembrane emp24 domain-containing protein 5 OS=Homo sapiens OX=9606 GN=TMED5 PE=1 SV=1
3123	TRUE	Q6ZNA5|FRRS1_HUMAN	78.0383	1	1														7	7		7	7		66114.4	Ferric-chelate reductase 1 OS=Homo sapiens OX=9606 GN=FRRS1 PE=2 SV=2
2013	TRUE	Q6RW13|ATRAP_HUMAN	150.666	2	2	7	28	4	26	30	1.15385		16	16	3	28	9.33333	11	18	1.63636	16	14	0.875		17419.2	Type-1 angiotensin II receptor-associated protein OS=Homo sapiens OX=9606 GN=AGTRAP PE=1 SV=1
969	TRUE	Q13148|TADBP_HUMAN	235.784	9	9	10	40	4	15	35	2.33333	4	14	3.5	6	31	5.16667	28	29	1.03571	32	26	0.8125	Carbamidomethylation; Oxidation (M)	44739.8	TAR DNA-binding protein 43 OS=Homo sapiens OX=9606 GN=TARDBP PE=1 SV=1
2594	TRUE	Q9BQ52|RNZ2_HUMAN	110.825	4	4		4	4		3	3								8	8					92219	Zinc phosphodiesterase ELAC protein 2 OS=Homo sapiens OX=9606 GN=ELAC2 PE=1 SV=2
3263	TRUE	Q16842|SIA4B_HUMAN	68.1754	2	2		4	4		5	5					4	4		1	1					40172.8	CMP-N-acetylneuraminate-beta-galactosamide-alpha-2,3-sialyltransferase 2 OS=Homo sapiens OX=9606 GN=ST3GAL2 PE=2 SV=1
2657	TRUE	Q9BXW6|OSBL1_HUMAN	107.244	3	3	2	8	4	4	9	2.25								1	1				Carbamidomethylation	108470	Oxysterol-binding protein-related protein 1 OS=Homo sapiens OX=9606 GN=OSBPL1A PE=1 SV=2
2487	TRUE	Q9UKF6|CPSF3_HUMAN	117.154	4	4	1	4	4		6	6		1	1		1	1	2	1	0.5				Carbamidomethylation	77486	Cleavage and polyadenylation specificity factor subunit 3 OS=Homo sapiens OX=9606 GN=CPSF3 PE=1 SV=1
2818	TRUE	Q9BV40|VAMP8_HUMAN	97.13	2	2	1	4	4	3	2	0.666667	5			7	12	1.71429	7	1	0.142857					11438.2	Vesicle-associated membrane protein 8 OS=Homo sapiens OX=9606 GN=VAMP8 PE=1 SV=1
2949	TRUE	Q8N1S5|S39AB_HUMAN	87.9163	2	2		4	4	1	9	9					3	3	1			4				35396	Zinc transporter ZIP11 OS=Homo sapiens OX=9606 GN=SLC39A11 PE=2 SV=3
1739	FALSE	P0DMM9|ST1A3_HUMAN	74.9746	2	2		4	4	1	7	7		3	3		2	2								34196.2	Sulfotransferase 1A3 OS=Homo sapiens OX=9606 GN=SULT1A3 PE=1 SV=1
1739	FALSE	P0DMN0|ST1A4_HUMAN	74.9746	2	2		4	4	1	7	7		3	3		2	2								34196.2	Sulfotransferase 1A4 OS=Homo sapiens OX=9606 GN=SULT1A4 PE=1 SV=1
1872	TRUE	O75251|NDUS7_HUMAN	160.848	5	5		4	4	5	18	3.6		1	1										Carbamidomethylation	23563.5	NADH dehydrogenase [ubiquinone] iron-sulfur protein 7, mitochondrial OS=Homo sapiens OX=9606 GN=NDUFS7 PE=1 SV=3
2598	TRUE	Q15154|PCM1_HUMAN	110.653	4	4	1	4	4	1	7	7														228544	Pericentriolar material 1 protein OS=Homo sapiens OX=9606 GN=PCM1 PE=1 SV=5
720	TRUE	Q9NR09|BIRC6_HUMAN	259.861	22	22	16	59	3.6875	15	68	4.53333	2				9	9	9	30	3.33333	2	18	9	Carbamidomethylation	530255	Baculoviral IAP repeat-containing protein 6 OS=Homo sapiens OX=9606 GN=BIRC6 PE=1 SV=2
1369	TRUE	Q9GZZ1|NAA50_HUMAN	200.417	8	8	3	11	3.66667		27	27		12	12		44	44					3	3	Carbamidomethylation	19398.3	N-alpha-acetyltransferase 50 OS=Homo sapiens OX=9606 GN=NAA50 PE=1 SV=1
1094	TRUE	Q9Y6M5|ZNT1_HUMAN	223.559	11	11	3	11	3.66667	20	43	2.15	1	2	2	2	21	10.5	2	10	5	9	22	2.44444	Carbamidomethylation	55299.8	Zinc transporter 1 OS=Homo sapiens OX=9606 GN=SLC30A1 PE=1 SV=3
1854	TRUE	Q6KB66|K2C80_HUMAN	161.712	5	4	7	25	3.57143	94	8	0.0851064	12	5	0.416667	18	5	0.277778	18	13	0.722222	19	26	1.36842		50525.3	Keratin, type II cytoskeletal 80 OS=Homo sapiens OX=9606 GN=KRT80 PE=1 SV=2
1347	TRUE	Q49A26|GLYR1_HUMAN	202.536	6	6	2	7	3.5	6	16	2.66667		2	2		15	15	3	11	3.66667	3	27	9	Carbamidomethylation	60547.4	Putative oxidoreductase GLYR1 OS=Homo sapiens OX=9606 GN=GLYR1 PE=1 SV=4
1358	TRUE	Q9UJX3|APC7_HUMAN	201.431	10	10	2	7	3.5		35	35					25	25		9	9		7	7	Carbamidomethylation	66855.5	Anaphase-promoting complex subunit 7 OS=Homo sapiens OX=9606 GN=ANAPC7 PE=1 SV=4
1601	FALSE	P35626|ARBK2_HUMAN	146.784	4	4	2	7	3.5		18	18							2	6	3	1	6	6	Carbamidomethylation	79709.7	Beta-adrenergic receptor kinase 2 OS=Homo sapiens OX=9606 GN=GRK3 PE=1 SV=2
623	FALSE	Q6ZN66|GBP6_HUMAN	165.528	3	1				37	22	0.594595				2	4	2				1	7	7		72426.7	Guanylate-binding protein 6 OS=Homo sapiens OX=9606 GN=GBP6 PE=2 SV=1
1601	TRUE	P25098|ARBK1_HUMAN	181.217	8	8	2	7	3.5	1	22	22							3	7	2.33333	1	6	6	Carbamidomethylation	79573.6	Beta-adrenergic receptor kinase 1 OS=Homo sapiens OX=9606 GN=GRK2 PE=1 SV=2
2151	TRUE	Q8TB24|RIN3_HUMAN	142.495	5	5	2	7	3.5	1	12	12		3	3				8	12	1.5		6	6	Carbamidomethylation	107854	Ras and Rab interactor 3 OS=Homo sapiens OX=9606 GN=RIN3 PE=1 SV=4
3294	TRUE	P23219|PGH1_HUMAN	66.752	1	1	3			2	3	1.5							4				7	7		68686.4	Prostaglandin G/H synthase 1 OS=Homo sapiens OX=9606 GN=PTGS1 PE=1 SV=2
1739	FALSE	P50226|ST1A2_HUMAN	154.139	5	5	4	14	3.5	10	21	2.1		3	3		2	2		6	6		5	5		34309.7	Sulfotransferase 1A2 OS=Homo sapiens OX=9606 GN=SULT1A2 PE=1 SV=2
1553	TRUE	Q6ZUJ8|BCAP_HUMAN	185.563	11	11	4	14	3.5	8	19	2.375	1	3	3	1	10	10	16	20	1.25	3	7	2.33333	Carbamidomethylation	90397.8	Phosphoinositide 3-kinase adapter protein 1 OS=Homo sapiens OX=9606 GN=PIK3AP1 PE=1 SV=2
1652	TRUE	Q9H2V7|SPNS1_HUMAN	176.103	5	5	4	14	3.5		30	30	1			1	2	2	7	6	0.857143	4	9	2.25		56629.7	Protein spinster homolog 1 OS=Homo sapiens OX=9606 GN=SPNS1 PE=1 SV=1
3111	TRUE	Q6ZMG9|CERS6_HUMAN	78.6475	1	1					4	4					5	5		5	5	2	13	6.5	Carbamidomethylation	44889.9	Ceramide synthase 6 OS=Homo sapiens OX=9606 GN=CERS6 PE=1 SV=1
2081	TRUE	Q9BXP2|S12A9_HUMAN	146.591	6	6	2	7	3.5	10	10	1							5	4	0.8	6	10	1.66667	Carbamidomethylation	96109.7	Solute carrier family 12 member 9 OS=Homo sapiens OX=9606 GN=SLC12A9 PE=1 SV=1
2541	TRUE	Q8IWE5|PKHM2_HUMAN	113.9	3	3	6	21	3.5	11	19	1.72727							15	14	0.933333	7	8	1.14286	Carbamidomethylation	112780	Pleckstrin homology domain-containing family M member 2 OS=Homo sapiens OX=9606 GN=PLEKHM2 PE=1 SV=2
2158	TRUE	Q8IYU8|MICU2_HUMAN	142.04	5	5	2	7	3.5	9	9	1	1				1	1	8	6	0.75	7	8	1.14286	Carbamidomethylation	49666.2	Calcium uptake protein 2, mitochondrial OS=Homo sapiens OX=9606 GN=MICU2 PE=1 SV=2
2461	TRUE	Q96M96|FGD4_HUMAN	119.376	6	6	3	10	3.33333	1				6	6		1	1	1	3	3		3	3	Carbamidomethylation	86626.3	FYVE, RhoGEF and PH domain-containing protein 4 OS=Homo sapiens OX=9606 GN=FGD4 PE=1 SV=2
1620	TRUE	P51553|IDH3G_HUMAN	179.392	4	4	6	20	3.33333	13	16	1.23077	1	3	3		11	11	6	17	2.83333	8	24	3	Carbamidomethylation	42794.3	Isocitrate dehydrogenase [NAD] subunit gamma, mitochondrial OS=Homo sapiens OX=9606 GN=IDH3G PE=1 SV=1
876	TRUE	P46939|UTRO_HUMAN	245.155	21	21	3	10	3.33333	27	46	1.7037							3	3	1	5	12	2.4	Carbamidomethylation	394466	Utrophin OS=Homo sapiens OX=9606 GN=UTRN PE=1 SV=2
1546	TRUE	O43837|IDH3B_HUMAN	185.832	6	6	3	10	3.33333	13	21	1.61538	12	10	0.833333		2	2	13	24	1.84615	17	20	1.17647	Carbamidomethylation	42183.7	Isocitrate dehydrogenase [NAD] subunit beta, mitochondrial OS=Homo sapiens OX=9606 GN=IDH3B PE=1 SV=2
2188	TRUE	O14929|HAT1_HUMAN	139.972	3	3	3	10	3.33333		6	6							4	9	2.25		1	1	Carbamidomethylation	49512.6	Histone acetyltransferase type B catalytic subunit OS=Homo sapiens OX=9606 GN=HAT1 PE=1 SV=1
1694	TRUE	O15228|GNPAT_HUMAN	172.982	6	6	3	10	3.33333	14	20	1.42857					5	5	6	10	1.66667	13	13	1	Carbamidomethylation	77187.9	Dihydroxyacetone phosphate acyltransferase OS=Homo sapiens OX=9606 GN=GNPAT PE=1 SV=1
2415	TRUE	O75907|DGAT1_HUMAN	122.112	2	2	3	10	3.33333	11	7	0.636364	1	1	1	2	3	1.5	14	18	1.28571	11	11	1		55278.3	Diacylglycerol O-acyltransferase 1 OS=Homo sapiens OX=9606 GN=DGAT1 PE=1 SV=2
2462	TRUE	Q9UBY8|CLN8_HUMAN	119.354	3	3	3	10	3.33333	20	11	0.55	1	1	1		1	1	5	7	1.4	6	4	0.666667		32787.3	Protein CLN8 OS=Homo sapiens OX=9606 GN=CLN8 PE=1 SV=3
1993	TRUE	Q13905|RPGF1_HUMAN	152.23	9	9	3	10	3.33333	7	4	0.571429				1			3	8	2.66667	1			Carbamidomethylation; Oxidation (M)	120548	Rap guanine nucleotide exchange factor 1 OS=Homo sapiens OX=9606 GN=RAPGEF1 PE=1 SV=3
985	TRUE	O75787|RENR_HUMAN	234.196	9	9	4	13	3.25	5	18	3.6	5	18	3.6	2	33	16.5	6	21	3.5	4	32	8	Oxidation (M)	39008	Renin receptor OS=Homo sapiens OX=9606 GN=ATP6AP2 PE=1 SV=2
1953	TRUE	O43374|RASL2_HUMAN	155.415	8	8	4	13	3.25	5	24	4.8					1	1	1	5	5		2	2	Carbamidomethylation	90457.6	Ras GTPase-activating protein 4 OS=Homo sapiens OX=9606 GN=RASA4 PE=2 SV=2
1953	TRUE	C9J798|RAS4B_HUMAN	155.415	8	8	4	13	3.25	5	24	4.8					1	1	1	5	5		2	2	Carbamidomethylation	90406.5	Ras GTPase-activating protein 4B OS=Homo sapiens OX=9606 GN=RASA4B PE=3 SV=2
2577	TRUE	Q9UDY4|DNJB4_HUMAN	111.836	2	1		2	2		2	2	1	6	6		10	10		5	5		6	6	Carbamidomethylation	37806.8	DnaJ homolog subfamily B member 4 OS=Homo sapiens OX=9606 GN=DNAJB4 PE=1 SV=1
1889	TRUE	P00403|COX2_HUMAN	159.944	5	5	9	29	3.22222	22	15	0.681818	6	2	0.333333				21	20	0.952381	13	13	1	Oxidation (M)	25565	Cytochrome c oxidase subunit 2 OS=Homo sapiens OX=9606 GN=MT-CO2 PE=1 SV=1
545	TRUE	Q14643|ITPR1_HUMAN	284.255	26	23	5	16	3.2	2	32	16							47	70	1.48936	16	50	3.125	Carbamidomethylation; Oxidation (M)	313929	Inositol 1,4,5-trisphosphate receptor type 1 OS=Homo sapiens OX=9606 GN=ITPR1 PE=1 SV=3
3423	TRUE	Q9UKL0|RCOR1_HUMAN	59.8925	1	1					1	1							1	5	5		6	6		53327.4	REST corepressor 1 OS=Homo sapiens OX=9606 GN=RCOR1 PE=1 SV=2
591	TRUE	Q13443|ADAM9_HUMAN	278.331	14	14	18	57	3.16667	3	68	22.6667	1	10	10		28	28	6	53	8.83333	1	40	40	Carbamidomethylation	90556	Disintegrin and metalloproteinase domain-containing protein 9 OS=Homo sapiens OX=9606 GN=ADAM9 PE=1 SV=1
158	TRUE	P02538|K2C6A_HUMAN	364.461	45	2	39	123	3.15385	206	42	0.203883	51	25	0.490196	36	27	0.75	117	79	0.675214	142	301	2.11972	Oxidation (M)	60044.9	Keratin, type II cytoskeletal 6A OS=Homo sapiens OX=9606 GN=KRT6A PE=1 SV=3
861	TRUE	Q96RP9|EFGM_HUMAN	247.261	14	14	15	47	3.13333	18	44	2.44444	3	10	3.33333	1	9	9	45	37	0.822222	29	40	1.37931	Carbamidomethylation	83471.5	Elongation factor G, mitochondrial OS=Homo sapiens OX=9606 GN=GFM1 PE=1 SV=2
722	TRUE	Q93009|UBP7_HUMAN	259.789	21	21	9	28	3.11111	17	70	4.11765		3	3		8	8	7	21	3	9	35	3.88889	Carbamidomethylation	128302	Ubiquitin carboxyl-terminal hydrolase 7 OS=Homo sapiens OX=9606 GN=USP7 PE=1 SV=2
508	TRUE	Q7Z3J2|VP35L_HUMAN	290.924	25	25	25	77	3.08	37	107	2.89189	3	9	3	2	18	9	49	60	1.22449	37	51	1.37838	Carbamidomethylation	109563	VPS35 endosomal protein sorting factor-like OS=Homo sapiens OX=9606 GN=VPS35L PE=1 SV=2
597	TRUE	P78347|GTF2I_HUMAN	277.996	18	18	23	70	3.04348	14	88	6.28571	2	41	20.5	1	45	45	23	91	3.95652	11	112	10.1818	Carbamidomethylation	112416	General transcription factor II-I OS=Homo sapiens OX=9606 GN=GTF2I PE=1 SV=2
2047	TRUE	Q9UKV8|AGO2_HUMAN	148.99	4	1		3	3	3	6	2		1	1		1	1		3	3		6	6	Carbamidomethylation	97208.1	Protein argonaute-2 OS=Homo sapiens OX=9606 GN=AGO2 PE=1 SV=3
562	TRUE	Q9P2E3|ZNFX1_HUMAN	282.074	27	27		3	3	4	96	24					5	5	1	3	3		22	22	Carbamidomethylation	220227	NFX1-type zinc finger-containing protein 1 OS=Homo sapiens OX=9606 GN=ZNFX1 PE=2 SV=2
1521	TRUE	Q96J02|ITCH_HUMAN	188.108	9	9	3	9	3	3	32	10.6667		1	1		7	7	2	11	5.5	1	20	20	Carbamidomethylation	102803	E3 ubiquitin-protein ligase Itchy homolog OS=Homo sapiens OX=9606 GN=ITCH PE=1 SV=2
2506	TRUE	Q9NZJ9|NUDT4_HUMAN	116.157	2	2		3	3		5	5		4	4		13	13		10	10		15	15		20306	Diphosphoinositol polyphosphate phosphohydrolase 2 OS=Homo sapiens OX=9606 GN=NUDT4 PE=1 SV=2
2164	TRUE	P50148|GNAQ_HUMAN	141.635	6	4		3	3	3	7	2.33333	1	2	2	1	9	9	2	3	1.5	1	9	9	Carbamidomethylation	42142.1	Guanine nucleotide-binding protein G(q) subunit alpha OS=Homo sapiens OX=9606 GN=GNAQ PE=1 SV=4
2286	TRUE	Q96GQ7|DDX27_HUMAN	132.965	5	5		3	3	1	10	10	1				1	1	1	7	7		8	8		89835.2	Probable ATP-dependent RNA helicase DDX27 OS=Homo sapiens OX=9606 GN=DDX27 PE=1 SV=2
1892	TRUE	Q6PI73|LIRA6_HUMAN	159.599	4	3		3	3		17	17					8	8		5	5		8	8	Carbamidomethylation	52399.2	Leukocyte immunoglobulin-like receptor subfamily A member 6 OS=Homo sapiens OX=9606 GN=LILRA6 PE=2 SV=2
1653	FALSE	Q99418|CYH2_HUMAN	91.3622	2	2		3	3		11	11		5	5	1	9	9	1	4	4	1	8	8		46546.1	Cytohesin-2 OS=Homo sapiens OX=9606 GN=CYTH2 PE=1 SV=2
2501	TRUE	O95391|SLU7_HUMAN	116.591	2	2		3	3		7	7								1	1		6	6	Carbamidomethylation	68386.7	Pre-mRNA-splicing factor SLU7 OS=Homo sapiens OX=9606 GN=SLU7 PE=1 SV=2
2407	TRUE	Q8TAG9|EXOC6_HUMAN	122.488	4	4	1	3	3	2	3	1.5		1	1				5	4	0.8		6	6	Carbamidomethylation	93722.3	Exocyst complex component 6 OS=Homo sapiens OX=9606 GN=EXOC6 PE=1 SV=3
1909	TRUE	O75022|LIRB3_HUMAN	158.91	4	3		3	3		26	26					15	15					6	6	Carbamidomethylation	69385.9	Leukocyte immunoglobulin-like receptor subfamily B member 3 OS=Homo sapiens OX=9606 GN=LILRB3 PE=1 SV=3
2163	TRUE	Q13009|TIAM1_HUMAN	141.696	6	6		3	3		6	6								10	10		5	5	Carbamidomethylation	177508	T-lymphoma invasion and metastasis-inducing protein 1 OS=Homo sapiens OX=9606 GN=TIAM1 PE=1 SV=2
1979	TRUE	Q15386|UBE3C_HUMAN	153.524	7	7	1	3	3		9	9								4	4		5	5		123923	Ubiquitin-protein ligase E3C OS=Homo sapiens OX=9606 GN=UBE3C PE=1 SV=3
1902	TRUE	Q9UKB1|FBW1B_HUMAN	159.223	7	7	1	3	3	1	3	3	1	2	2				6	9	1.5	1	5	5		62090.9	F-box/WD repeat-containing protein 11 OS=Homo sapiens OX=9606 GN=FBXW11 PE=1 SV=1
2467	TRUE	Q5T2E6|ARMD3_HUMAN	118.839	4	4		3	3	1	7	7								6	6	1	4	4		78710.5	Armadillo-like helical domain-containing protein 3 OS=Homo sapiens OX=9606 GN=ARMH3 PE=1 SV=1
2771	TRUE	Q9NYK5|RM39_HUMAN	99.6968	2	2		3	3	1	4	4		1	1		3	3	2	6	3	1	4	4		38711.8	39S ribosomal protein L39, mitochondrial OS=Homo sapiens OX=9606 GN=MRPL39 PE=1 SV=3
2010	TRUE	P98196|AT11A_HUMAN	151.001	4	4	2	6	3	5	14	2.8							3	7	2.33333	1	4	4	Carbamidomethylation	129756	Probable phospholipid-transporting ATPase IH OS=Homo sapiens OX=9606 GN=ATP11A PE=1 SV=3
2110	TRUE	Q10570|CPSF1_HUMAN	145.063	6	6	1	3	3	4	11	2.75		1	1					2	2		4	4	Carbamidomethylation	160884	Cleavage and polyadenylation specificity factor subunit 1 OS=Homo sapiens OX=9606 GN=CPSF1 PE=1 SV=2
2315	TRUE	Q96DM3|RMC1_HUMAN	130.513	5	5		3	3	5	7	1.4							4	2	0.5	1	4	4		74974.6	Regulator of MON1-CCZ1 complex OS=Homo sapiens OX=9606 GN=RMC1 PE=1 SV=2
1402	TRUE	Q8TC07|TBC15_HUMAN	197.736	11	11	9	27	3	5	39	7.8	1	2	2		9	9	18	17	0.944444	6	23	3.83333	Carbamidomethylation	79490.7	TBC1 domain family member 15 OS=Homo sapiens OX=9606 GN=TBC1D15 PE=1 SV=2
3616	TRUE	Q9P2X0|DPM3_HUMAN	50.5023	1	1	4			3	2	0.666667	3			2	2	1	7	6	0.857143	1	6	6		10093.7	Dolichol-phosphate mannosyltransferase subunit 3 OS=Homo sapiens OX=9606 GN=DPM3 PE=1 SV=2
1372	FALSE	P55055|NR1H2_HUMAN	115.075	3	3		3	3		3	3		24	24	1	29	29		8	8		3	3	Carbamidomethylation	50973.8	Oxysterols receptor LXR-beta OS=Homo sapiens OX=9606 GN=NR1H2 PE=1 SV=2
2071	TRUE	Q01780|EXOSX_HUMAN	147.196	5	5	2	6	3	3	10	3.33333					1	1	1	8	8	1	3	3		100831	Exosome component 10 OS=Homo sapiens OX=9606 GN=EXOSC10 PE=1 SV=2
3017	TRUE	Q9UKD2|MRT4_HUMAN	83.9598	2	2		3	3					4	4				4	9	2.25		3	3	Carbamidomethylation	27560.5	mRNA turnover protein 4 homolog OS=Homo sapiens OX=9606 GN=MRTO4 PE=1 SV=2
1902	FALSE	Q9Y297|FBW1A_HUMAN	120.921	4	4		3	3		2	2	1	2	2				4	8	2	1	3	3		68866.8	F-box/WD repeat-containing protein 1A OS=Homo sapiens OX=9606 GN=BTRC PE=1 SV=1
2512	TRUE	Q8N3U4|STAG2_HUMAN	115.771	4	4		3	3		13	13											3	3		141326	Cohesin subunit SA-2 OS=Homo sapiens OX=9606 GN=STAG2 PE=1 SV=3
2561	TRUE	P53990|IST1_HUMAN	112.779	2	2	2	6	3	3	8	2.66667							7	11	1.57143	6	16	2.66667		39750.5	IST1 homolog OS=Homo sapiens OX=9606 GN=IST1 PE=1 SV=1
2563	TRUE	Q9H3G5|CPVL_HUMAN	112.599	3	3	1	3	3	8	9	1.125		3	3	4	4	1	3	5	1.66667	4	10	2.5		54163.8	Probable serine carboxypeptidase CPVL OS=Homo sapiens OX=9606 GN=CPVL PE=1 SV=2
1294	TRUE	Q9H0Q0|CYRIA_HUMAN	205.703	8	5	4	12	3	11	24	2.18182	18	25	1.38889	22	38	1.72727	9	18	2	12	29	2.41667	Carbamidomethylation; Oxidation (M)	37312.8	CYFIP-related Rac1 interactor A OS=Homo sapiens OX=9606 GN=CYRIA PE=2 SV=1
2989	TRUE	Q3KQZ1|S2535_HUMAN	85.8263	2	2	1	3	3	1	4	4	3				2	2		3	3	3	7	2.33333	Carbamidomethylation	32437.7	Solute carrier family 25 member 35 OS=Homo sapiens OX=9606 GN=SLC25A35 PE=1 SV=1
2831	TRUE	P78318|IGBP1_HUMAN	96.5306	4	4		3	3		8	8					3	3		5	5		2	2		39221.9	Immunoglobulin-binding protein 1 OS=Homo sapiens OX=9606 GN=IGBP1 PE=1 SV=1
2534	TRUE	P04920|B3A2_HUMAN	114.453	5	5	1	3	3	2										3	3		2	2	Carbamidomethylation	137009	Anion exchange protein 2 OS=Homo sapiens OX=9606 GN=SLC4A2 PE=1 SV=4
2331	TRUE	Q9BZE1|RM37_HUMAN	128.992	3	3	2	6	3	3	1	0.333333				1	1	1	4	11	2.75	1	2	2	Carbamidomethylation	48117.5	39S ribosomal protein L37, mitochondrial OS=Homo sapiens OX=9606 GN=MRPL37 PE=1 SV=2
2943	TRUE	Q14684|RRP1B_HUMAN	88.7723	2	2		3	3	4									3	3	1	2	4	2	Carbamidomethylation	84427.5	Ribosomal RNA processing protein 1 homolog B OS=Homo sapiens OX=9606 GN=RRP1B PE=1 SV=3
2361	TRUE	O75815|BCAR3_HUMAN	126.043	5	5		3	3	2	13	6.5		1	1		1	1					2	2		92565.5	Breast cancer anti-estrogen resistance protein 3 OS=Homo sapiens OX=9606 GN=BCAR3 PE=1 SV=1
3223	TRUE	O60499|STX10_HUMAN	70.1685	1	1																	6	6		28114.1	Syntaxin-10 OS=Homo sapiens OX=9606 GN=STX10 PE=1 SV=1
3270	TRUE	Q15208|STK38_HUMAN	67.8613	1	1																	6	6		54190.2	Serine/threonine-protein kinase 38 OS=Homo sapiens OX=9606 GN=STK38 PE=1 SV=1
3389	TRUE	P22735|TGM1_HUMAN	61.7914	1	1																	6	6		89786.7	Protein-glutamine gamma-glutamyltransferase K OS=Homo sapiens OX=9606 GN=TGM1 PE=1 SV=4
3732	TRUE	Q13670|PM2PB_HUMAN	44.5325	1	1																	6	6		28554.6	Putative postmeiotic segregation increased 2-like protein 11 OS=Homo sapiens OX=9606 GN=PMS2P11 PE=5 SV=1
2082	TRUE	Q9BTY2|FUCO2_HUMAN	146.59	4	4		3	3	1	10	10							8	14	1.75	7	13	1.85714		54066.7	Plasma alpha-L-fucosidase OS=Homo sapiens OX=9606 GN=FUCA2 PE=1 SV=2
1142	TRUE	O75955|FLOT1_HUMAN	220.097	7	7		3	3	3	20	6.66667					5	5	7	20	2.85714	21	38	1.80952		47355.3	Flotillin-1 OS=Homo sapiens OX=9606 GN=FLOT1 PE=1 SV=3
899	TRUE	P13762|DRB4_HUMAN	243.026	11	6	1	3	3	14	25	1.78571	3	21	7	39	36	0.923077	2	18	9	22	39	1.77273	Carbamidomethylation	29941.1	HLA class II histocompatibility antigen, DR beta 4 chain OS=Homo sapiens OX=9606 GN=HLA-DRB4 PE=1 SV=2
2216	TRUE	P26572|MGAT1_HUMAN	138.208	4	4	2	6	3	7	12	1.71429	1	2	2		10	10	11	32	2.90909	15	26	1.73333		50878.4	Alpha-1,3-mannosyl-glycoprotein 2-beta-N-acetylglucosaminyltransferase OS=Homo sapiens OX=9606 GN=MGAT1 PE=1 SV=2
3022	TRUE	Q8NCW5|NNRE_HUMAN	83.7497	2	2		3	3										5	6	1.2	5	8	1.6		31674.6	NAD(P)H-hydrate epimerase OS=Homo sapiens OX=9606 GN=NAXE PE=1 SV=2
1980	TRUE	Q03252|LMNB2_HUMAN	153.27	9	8	1	3	3	5	4	0.8		1	1				1	3	3	4	6	1.5		69948.4	Lamin-B2 OS=Homo sapiens OX=9606 GN=LMNB2 PE=1 SV=4
2296	TRUE	Q8N6G5|CGAT2_HUMAN	131.711	4	4		3	3	1	13	13							3	8	2.66667	9	13	1.44444		62572.3	Chondroitin sulfate N-acetylgalactosaminyltransferase 2 OS=Homo sapiens OX=9606 GN=CSGALNACT2 PE=1 SV=1
1548	TRUE	Q8IUR7|ARMC8_HUMAN	185.775	10	10	2	6	3	3	20	6.66667	1	4	4		3	3	20	12	0.6	7	10	1.42857	Carbamidomethylation	75509.3	Armadillo repeat-containing protein 8 OS=Homo sapiens OX=9606 GN=ARMC8 PE=1 SV=2
3513	TRUE	Q15291|RBBP5_HUMAN	55.4573	1	1		1	1		6	6							5	7	1.4	3	16	5.33333		59152.6	Retinoblastoma-binding protein 5 OS=Homo sapiens OX=9606 GN=RBBP5 PE=1 SV=2
2304	TRUE	Q32P44|EMAL3_HUMAN	131.27	4	4	1	3	3	1	11	11	1			1	2	2	12	6	0.5	5	7	1.4		95196.8	Echinoderm microtubule-associated protein-like 3 OS=Homo sapiens OX=9606 GN=EML3 PE=1 SV=1
2573	TRUE	Q5RI15|COX20_HUMAN	112.224	2	2		3	3	5	4	0.8							3	8	2.66667	7	9	1.28571	Carbamidomethylation	13291.2	Cytochrome c oxidase assembly protein COX20, mitochondrial OS=Homo sapiens OX=9606 GN=COX20 PE=1 SV=2
2782	TRUE	O75886|STAM2_HUMAN	98.995	3	2	2	6	3	4	9	2.25		2	2		2	2	4	3	0.75	4	5	1.25		58164.2	Signal transducing adapter molecule 2 OS=Homo sapiens OX=9606 GN=STAM2 PE=1 SV=1
3727	TRUE	Q86UQ4|ABCAD_HUMAN	45.1647	2	2	1	3	3	2	2	1	5	2	0.4	3	1	0.333333	5	5	1	3	3	1		576159	ATP-binding cassette sub-family A member 13 OS=Homo sapiens OX=9606 GN=ABCA13 PE=2 SV=3
3114	TRUE	Q8N4Q0|PTGR3_HUMAN	78.5041	2	2	1	3	3		2	2								1	1		1	1		40140.4	Prostaglandin reductase 3 OS=Homo sapiens OX=9606 GN=ZADH2 PE=1 SV=1
3435	TRUE	P35611|ADDA_HUMAN	59.4898	2	2		3	3								1	1	2				1	1		80955.1	Alpha-adducin OS=Homo sapiens OX=9606 GN=ADD1 PE=1 SV=2
3122	TRUE	P83436|COG7_HUMAN	78.0691	2	2		3	3	1	4	4							5				1	1		86343.9	Conserved oligomeric Golgi complex subunit 7 OS=Homo sapiens OX=9606 GN=COG7 PE=1 SV=1
2414	TRUE	O15305|PMM2_HUMAN	122.209	3	3	6	18	3	7	6	0.857143	12	8	0.666667	5	6	1.2	11	10	0.909091	10	9	0.9		28082.1	Phosphomannomutase 2 OS=Homo sapiens OX=9606 GN=PMM2 PE=1 SV=1
2862	TRUE	Q08257|QOR_HUMAN	93.7996	2	2	2	6	3	2	2	1	1						7	8	1.14286	6	5	0.833333		35206.6	Quinone oxidoreductase OS=Homo sapiens OX=9606 GN=CRYZ PE=1 SV=1
1138	TRUE	O43592|XPOT_HUMAN	220.549	10	10	4	12	3	9	30	3.33333					7	7	7	11	1.57143	14	11	0.785714		109964	Exportin-T OS=Homo sapiens OX=9606 GN=XPOT PE=1 SV=2
941	FALSE	Q9Y6Q5|AP1M2_HUMAN	103.241	3	3		3	3	2	5	2.5	1						4	7	1.75	4	3	0.75		48108.5	AP-1 complex subunit mu-2 OS=Homo sapiens OX=9606 GN=AP1M2 PE=1 SV=4
2608	TRUE	Q13438|OS9_HUMAN	110.222	3	3	2	6	3	1	15	15	1						2	11	5.5	5	3	0.6		75561.6	Protein OS-9 OS=Homo sapiens OX=9606 GN=OS9 PE=1 SV=1
2203	FALSE	C9J202|AG1L2_HUMAN	69.0615	1	1		4	4	2	9	4.5		2	2		1	1		5	5		5	5		24153.6	Putative glycosyltransferase ALG1L2 OS=Homo sapiens OX=9606 GN=ALG1L2 PE=3 SV=1
2908	TRUE	Q9UL33|TPC2L_HUMAN	91.4682	2	2		3	3		10	10		3	3					5	5					16145.6	Trafficking protein particle complex subunit 2-like protein OS=Homo sapiens OX=9606 GN=TRAPPC2L PE=1 SV=1
3015	TRUE	Q5UCC4|EMC10_HUMAN	84.0842	1	1		1	1		4	4								5	5	2	10	5		27346.8	ER membrane protein complex subunit 10 OS=Homo sapiens OX=9606 GN=EMC10 PE=1 SV=1
2907	TRUE	O43676|NDUB3_HUMAN	91.469	2	2		3	3		10	10								5	5	1				11402	NADH dehydrogenase [ubiquinone] 1 beta subcomplex subunit 3 OS=Homo sapiens OX=9606 GN=NDUFB3 PE=1 SV=3
3903	TRUE	Q01638|ILRL1_HUMAN	37.0599	1	1	9	10	1.11111	4	7	1.75		2	2	11	2	0.181818		4	4		5	5		63357.9	Interleukin-1 receptor-like 1 OS=Homo sapiens OX=9606 GN=IL1RL1 PE=1 SV=4
2019	TRUE	Q7L2E3|DHX30_HUMAN	150.419	7	7	2	6	3		10	10							4	9	2.25					133938	ATP-dependent RNA helicase DHX30 OS=Homo sapiens OX=9606 GN=DHX30 PE=1 SV=1
2196	TRUE	Q96IJ6|GMPPA_HUMAN	139.522	4	4	3	9	3					2	2		7	7		2	2				Carbamidomethylation	46291.2	Mannose-1-phosphate guanyltransferase alpha OS=Homo sapiens OX=9606 GN=GMPPA PE=1 SV=1
2740	TRUE	P51398|RT29_HUMAN	101.292	3	3	2	6	3	3	5	1.66667					1	1		1	1					45566.4	28S ribosomal protein S29, mitochondrial OS=Homo sapiens OX=9606 GN=DAP3 PE=1 SV=1
2725	TRUE	Q8TDQ1|CLM1_HUMAN	102.159	2	2		3	3		8	8	1							1	1				Carbamidomethylation	32335.1	CMRF35-like molecule 1 OS=Homo sapiens OX=9606 GN=CD300LF PE=1 SV=3
2390	TRUE	Q9NPL8|TIDC1_HUMAN	123.561	3	3		3	3		3	3							5	5	1	7				32177.7	Complex I assembly factor TIMMDC1, mitochondrial OS=Homo sapiens OX=9606 GN=TIMMDC1 PE=1 SV=2
3255	TRUE	P15374|UCHL3_HUMAN	68.55	2	2		3	3											1	1					26182.6	Ubiquitin carboxyl-terminal hydrolase isozyme L3 OS=Homo sapiens OX=9606 GN=UCHL3 PE=1 SV=1
3112	TRUE	Q9NYP7|ELOV5_HUMAN	78.6317	2	2	1	3	3	3	3	1		1	1				1						Oxidation (M); Carbamidomethylation	35293.4	Elongation of very long chain fatty acids protein 5 OS=Homo sapiens OX=9606 GN=ELOVL5 PE=1 SV=1
2871	TRUE	P19793|RXRA_HUMAN	93.3022	2	2		3	3		3	3														50811.3	Retinoic acid receptor RXR-alpha OS=Homo sapiens OX=9606 GN=RXRA PE=1 SV=1
2848	TRUE	P37198|NUP62_HUMAN	95.2086	3	3		3	3	4	6	1.5							3			1				53254.9	Nuclear pore glycoprotein p62 OS=Homo sapiens OX=9606 GN=NUP62 PE=1 SV=3
2826	TRUE	Q6Y1H2|HACD2_HUMAN	96.8157	2	2	1	3	3	3	2	0.666667														28368.4	Very-long-chain (3R)-3-hydroxyacyl-CoA dehydratase 2 OS=Homo sapiens OX=9606 GN=HACD2 PE=1 SV=1
2882	TRUE	Q16630|CPSF6_HUMAN	92.7665	2	2	1	3	3	3	1	0.333333				1			3			2				59209.8	Cleavage and polyadenylation specificity factor subunit 6 OS=Homo sapiens OX=9606 GN=CPSF6 PE=1 SV=2
357	TRUE	Q9Y4D7|PLXD1_HUMAN	312.882	34	34	43	128	2.97674	19	98	5.15789		3	3		12	12	11	51	4.63636	11	37	3.36364	Carbamidomethylation	212007	Plexin-D1 OS=Homo sapiens OX=9606 GN=PLXND1 PE=1 SV=3
3239	TRUE	Q8NHX9|TPC2_HUMAN	69.232	1	1													2	5	2.5		5	5		85243	Two pore calcium channel protein 2 OS=Homo sapiens OX=9606 GN=TPCN2 PE=1 SV=2
354	TRUE	Q99538|LGMN_HUMAN	313.932	18	18	15	44	2.93333	21	136	6.47619	8	35	4.375	17	117	6.88235	5	38	7.6	9	58	6.44444	Carbamidomethylation; Oxidation (M)	49411.2	Legumain OS=Homo sapiens OX=9606 GN=LGMN PE=1 SV=1
823	TRUE	Q29RF7|PDS5A_HUMAN	250.641	15	15	18	52	2.88889	16	64	4		6	6		4	4	21	44	2.09524	6	37	6.16667	Carbamidomethylation	150830	Sister chromatid cohesion protein PDS5 homolog A OS=Homo sapiens OX=9606 GN=PDS5A PE=1 SV=1
624	TRUE	P10253|LYAG_HUMAN	273.95	15	15	9	26	2.88889	21	66	3.14286	12	19	1.58333	15	29	1.93333	35	60	1.71429	37	52	1.40541	Carbamidomethylation	105324	Lysosomal alpha-glucosidase OS=Homo sapiens OX=9606 GN=GAA PE=1 SV=4
2815	TRUE	Q8N149|LIRA2_HUMAN	97.2276	2	1		1	1	2	5	2.5	1	2	2				1	2	2		5	5		52991.7	Leukocyte immunoglobulin-like receptor subfamily A member 2 OS=Homo sapiens OX=9606 GN=LILRA2 PE=1 SV=2
236	TRUE	P04259|K2C6B_HUMAN	342.381	41	3	47	135	2.87234	231	37	0.160173	42	17	0.404762	27	27	1	120	79	0.658333	134	263	1.96269	Oxidation (M)	60067	Keratin, type II cytoskeletal 6B OS=Homo sapiens OX=9606 GN=KRT6B PE=1 SV=5
3345	TRUE	Q69YN4|VIR_HUMAN	64.1603	1	1					2	2							1	2	2	1	5	5		202025	Protein virilizer homolog OS=Homo sapiens OX=9606 GN=VIRMA PE=1 SV=2
3866	TRUE	P30837|AL1B1_HUMAN	38.6064	1	1													1	2	2		5	5		57206.3	Aldehyde dehydrogenase X, mitochondrial OS=Homo sapiens OX=9606 GN=ALDH1B1 PE=1 SV=3
1011	TRUE	O96005|CLPT1_HUMAN	231.685	12	12	18	51	2.83333	26	56	2.15385	7	42	6	2	38	19	13	42	3.23077	2	18	9	Oxidation (M); Carbamidomethylation	76096.7	Cleft lip and palate transmembrane protein 1 OS=Homo sapiens OX=9606 GN=CLPTM1 PE=1 SV=1
1739	TRUE	P50225|ST1A1_HUMAN	169.312	7	7	6	17	2.83333	11	25	2.27273		4	4		2	2		6	6		6	6		34165.3	Sulfotransferase 1A1 OS=Homo sapiens OX=9606 GN=SULT1A1 PE=1 SV=3
1689	TRUE	Q3SY84|K2C71_HUMAN	173.425	8	3	14	39	2.78571	25	3	0.12	1			17			12	3	0.25	10	19	1.9		57291.5	Keratin, type II cytoskeletal 71 OS=Homo sapiens OX=9606 GN=KRT71 PE=1 SV=3
1234	TRUE	Q9UH99|SUN2_HUMAN	210.79	7	7	8	22	2.75	10	23	2.3	4	10	2.5	3	25	8.33333		10	10	5	18	3.6		80310.9	SUN domain-containing protein 2 OS=Homo sapiens OX=9606 GN=SUN2 PE=1 SV=3
1139	TRUE	Q9H0A0|NAT10_HUMAN	220.526	13	13	7	19	2.71429	7	29	4.14286				1	3	3	13	15	1.15385	3	18	6	Carbamidomethylation	115730	RNA cytidine acetyltransferase OS=Homo sapiens OX=9606 GN=NAT10 PE=1 SV=2
2974	TRUE	Q15800|MSMO1_HUMAN	86.6582	1	1	8	3	0.375	3	2	0.666667	2	16	8		4	4	6	7	1.16667		5	5		35215.7	Methylsterol monooxygenase 1 OS=Homo sapiens OX=9606 GN=MSMO1 PE=1 SV=1
772	TRUE	Q70J99|UN13D_HUMAN	255.881	14	14	17	46	2.70588	7	78	11.1429	4	3	0.75		11	11	25	57	2.28	9	47	5.22222	Carbamidomethylation	123282	Protein unc-13 homolog D OS=Homo sapiens OX=9606 GN=UNC13D PE=1 SV=1
1367	TRUE	Q9UIA0|CYH4_HUMAN	200.837	9	9	10	27	2.7	3	30	10	12	12	1		25	25	4	9	2.25		4	4	Carbamidomethylation	45672	Cytohesin-4 OS=Homo sapiens OX=9606 GN=CYTH4 PE=1 SV=1
2860	TRUE	P67812|SC11A_HUMAN	94.0902	2	2	6	16	2.66667	5	7	1.4					1	1	1	3	3		5	5		20625.3	Signal peptidase complex catalytic subunit SEC11A OS=Homo sapiens OX=9606 GN=SEC11A PE=1 SV=1
2983	TRUE	Q15819|UB2V2_HUMAN	86.0683	2	2	3	8	2.66667	4	4	1	3	3	1	5	1	0.2	4	3	0.75	1	4	4		16362.7	Ubiquitin-conjugating enzyme E2 variant 2 OS=Homo sapiens OX=9606 GN=UBE2V2 PE=1 SV=4
2983	TRUE	Q13404|UB2V1_HUMAN	86.0683	2	2	3	8	2.66667	4	4	1	3	3	1	5	1	0.2	4	3	0.75	1	4	4		16495	Ubiquitin-conjugating enzyme E2 variant 1 OS=Homo sapiens OX=9606 GN=UBE2V1 PE=1 SV=2
1782	TRUE	O75153|CLU_HUMAN	166.143	10	10	9	24	2.66667	4	10	2.5	5	3	0.6	5			5	22	4.4	1	3	3	Carbamidomethylation	146670	Clustered mitochondria protein homolog OS=Homo sapiens OX=9606 GN=CLUH PE=1 SV=2
1285	FALSE	P84074|HPCA_HUMAN	127.004	3	3	3	8	2.66667	5	10	2	17	14	0.823529	16	14	0.875	4	6	1.5	3	6	2		22427.4	Neuron-specific calcium-binding protein hippocalcin OS=Homo sapiens OX=9606 GN=HPCA PE=1 SV=2
2166	TRUE	Q9H9B4|SFXN1_HUMAN	141.454	6	4	6	16	2.66667	9	13	1.44444	4	4	1		4	4	5	6	1.2	2	4	2		35619.4	Sideroflexin-1 OS=Homo sapiens OX=9606 GN=SFXN1 PE=1 SV=4
3418	TRUE	P62341|SELT_HUMAN	60.4717	1	1		7	7		7	7							2	2	1		5	5		22293	Thioredoxin reductase-like selenoprotein T OS=Homo sapiens OX=9606 GN=SELENOT PE=1 SV=2
1942	TRUE	O00767|ACOD_HUMAN	156.13	4	4	3	8	2.66667	5	17	3.4		8	8		18	18	6	10	1.66667	13	20	1.53846		41522.7	Acyl-CoA desaturase OS=Homo sapiens OX=9606 GN=SCD PE=1 SV=2
3268	TRUE	Q6P589|TP8L2_HUMAN	67.9635	1	1		1	1	1	2	2								1	1		5	5		20555.7	Tumor necrosis factor alpha-induced protein 8-like protein 2 OS=Homo sapiens OX=9606 GN=TNFAIP8L2 PE=1 SV=1
1492	TRUE	P36969|GPX4_HUMAN	190.366	5	5	8	21	2.625	15	17	1.13333	20	22	1.1	10	20	2	10	15	1.5	6	13	2.16667	Carbamidomethylation; Oxidation (M)	22143.5	Phospholipid hydroperoxide glutathione peroxidase OS=Homo sapiens OX=9606 GN=GPX4 PE=1 SV=3
3335	TRUE	P34059|GALNS_HUMAN	64.5033	1	1	2			5	1	0.2								1	1		5	5		58026	N-acetylgalactosamine-6-sulfatase OS=Homo sapiens OX=9606 GN=GALNS PE=1 SV=1
3373	TRUE	Q7Z333|SETX_HUMAN	62.5804	1	1		1	1											1	1	1	5	5		302880	Probable helicase senataxin OS=Homo sapiens OX=9606 GN=SETX PE=1 SV=4
683	TRUE	Q14839|CHD4_HUMAN	264.601	19	19	10	26	2.6	9	71	7.88889					16	16	11	29	2.63636	2	42	21	Carbamidomethylation	218005	Chromodomain-helicase-DNA-binding protein 4 OS=Homo sapiens OX=9606 GN=CHD4 PE=1 SV=2
1635	FALSE	P46439|GSTM5_HUMAN	74.8179	1	1		2	2					1	1		1	1	8	7	0.875	1	5	5		25674.7	Glutathione S-transferase Mu 5 OS=Homo sapiens OX=9606 GN=GSTM5 PE=1 SV=3
1412	TRUE	Q9HCE0|EPG5_HUMAN	197.289	9	9	5	13	2.6	18	45	2.5					1	1	2	11	5.5	3	17	5.66667	Carbamidomethylation	292481	Ectopic P granules protein 5 homolog OS=Homo sapiens OX=9606 GN=EPG5 PE=1 SV=2
582	TRUE	P15104|GLNA_HUMAN	279.621	13	13	7	18	2.57143	28	87	3.10714	5	20	4	8	106	13.25	11	26	2.36364	5	36	7.2	Carbamidomethylation	42064.4	Glutamine synthetase OS=Homo sapiens OX=9606 GN=GLUL PE=1 SV=4
1574	TRUE	Q9UGP8|SEC63_HUMAN	183.55	10	10	7	18	2.57143	9	21	2.33333	2			1			11	16	1.45455	13	24	1.84615	Carbamidomethylation	87996.9	Translocation protein SEC63 homolog OS=Homo sapiens OX=9606 GN=SEC63 PE=1 SV=2
1021	TRUE	P61619|S61A1_HUMAN	230.431	11	11	14	36	2.57143	41	44	1.07317	31	21	0.677419	14	25	1.78571	25	25	1	20	33	1.65	Carbamidomethylation	52264.7	Protein transport protein Sec61 subunit alpha isoform 1 OS=Homo sapiens OX=9606 GN=SEC61A1 PE=1 SV=2
540	TRUE	A5YKK6|CNOT1_HUMAN	285.279	27	27	17	43	2.52941	25	99	3.96					15	15	5	19	3.8	7	25	3.57143	Carbamidomethylation	266939	CCR4-NOT transcription complex subunit 1 OS=Homo sapiens OX=9606 GN=CNOT1 PE=1 SV=2
1471	TRUE	Q53EP0|FND3B_HUMAN	192.273	10	10	2	5	2.5	5	36	7.2					15	15	1	7	7	1	10	10	Carbamidomethylation	132888	Fibronectin type III domain-containing protein 3B OS=Homo sapiens OX=9606 GN=FNDC3B PE=1 SV=2
2113	TRUE	P03915|NU5M_HUMAN	144.861	4	4	6	15	2.5	10	13	1.3	2	2	1		2	2		11	11	5	17	3.4		67026.5	NADH-ubiquinone oxidoreductase chain 5 OS=Homo sapiens OX=9606 GN=MT-ND5 PE=1 SV=2
1931	TRUE	O60502|OGA_HUMAN	156.945	7	7	2	5	2.5	2	13	6.5							3	6	2	3	10	3.33333		102915	Protein O-GlcNAcase OS=Homo sapiens OX=9606 GN=OGA PE=1 SV=2
1712	TRUE	Q7Z3E5|ARMC9_HUMAN	171.651	7	7	2	5	2.5	3	4	1.33333							8	16	2	4	13	3.25	Carbamidomethylation	91818.7	LisH domain-containing protein ARMC9 OS=Homo sapiens OX=9606 GN=ARMC9 PE=1 SV=3
1873	TRUE	Q9HCU5|PREB_HUMAN	160.839	5	5	6	15	2.5	10	14	1.4		7	7	1			8	10	1.25	4	12	3	Carbamidomethylation	45468.2	Prolactin regulatory element-binding protein OS=Homo sapiens OX=9606 GN=PREB PE=1 SV=2
1585	TRUE	O94886|CSCL1_HUMAN	182.757	6	6	10	25	2.5	19	30	1.57895	4	6	1.5	1	15	15	7	12	1.71429	9	23	2.55556	Carbamidomethylation	92126.2	CSC1-like protein 1 OS=Homo sapiens OX=9606 GN=TMEM63A PE=1 SV=3
1861	TRUE	Q9H3K2|GHITM_HUMAN	161.319	6	6	8	20	2.5	12	30	2.5		10	10		22	22	3	15	5	12	23	1.91667	Carbamidomethylation	37205.2	Growth hormone-inducible transmembrane protein OS=Homo sapiens OX=9606 GN=GHITM PE=1 SV=2
2797	TRUE	O75150|BRE1B_HUMAN	97.8522	2	1	1	1	1	2	5	2.5											5	5		113678	E3 ubiquitin-protein ligase BRE1B OS=Homo sapiens OX=9606 GN=RNF40 PE=1 SV=5
1040	TRUE	Q9Y487|VPP2_HUMAN	228.828	11	10	6	15	2.5	13	44	3.38462	5	14	2.8		9	9	13	16	1.23077	15	26	1.73333	Carbamidomethylation	98082.3	V-type proton ATPase 116 kDa subunit a2 OS=Homo sapiens OX=9606 GN=ATP6V0A2 PE=1 SV=2
3532	TRUE	Q7L7V1|DHX32_HUMAN	54.7939	1	1					1	1											5	5		84418.6	Putative pre-mRNA-splicing factor ATP-dependent RNA helicase DHX32 OS=Homo sapiens OX=9606 GN=DHX32 PE=1 SV=1
522	TRUE	P05091|ALDH2_HUMAN	288.213	17	17	4	10	2.5	40	70	1.75	30	33	1.1	38	103	2.71053	31	45	1.45161	73	123	1.68493	Oxidation (M); Carbamidomethylation	56381.3	Aldehyde dehydrogenase, mitochondrial OS=Homo sapiens OX=9606 GN=ALDH2 PE=1 SV=2
1100	FALSE	P11388|TOP2A_HUMAN	96.2795	3	3	2	5	2.5	4	2	0.5					1	1	4	5	1.25	1				174385	DNA topoisomerase 2-alpha OS=Homo sapiens OX=9606 GN=TOP2A PE=1 SV=3
2721	TRUE	Q5T5Y3|CAMP1_HUMAN	102.311	4	4	4	10	2.5	1									3	3	1					177972	Calmodulin-regulated spectrin-associated protein 1 OS=Homo sapiens OX=9606 GN=CAMSAP1 PE=1 SV=2
3334	TRUE	Q12791|KCMA1_HUMAN	64.5533	1	1																	5	5		137560	Calcium-activated potassium channel subunit alpha-1 OS=Homo sapiens OX=9606 GN=KCNMA1 PE=1 SV=2
1837	TRUE	O14841|OPLA_HUMAN	162.855	5	5	2	5	2.5	4	18	4.5														137457	5-oxoprolinase OS=Homo sapiens OX=9606 GN=OPLAH PE=1 SV=3
661	TRUE	Q9P253|VPS18_HUMAN	267.59	13	13	12	29	2.41667	17	47	2.76471	2	3	1.5				16	26	1.625	11	26	2.36364	Carbamidomethylation	110186	Vacuolar protein sorting-associated protein 18 homolog OS=Homo sapiens OX=9606 GN=VPS18 PE=1 SV=2
8	TRUE	P35527|K1C9_HUMAN	564.576	130	130	263	635	2.41445	711	128	0.180028	114	135	1.18421	191	45	0.235602	400	225	0.5625	554	1000	1.80505	Oxidation (M); Carbamidomethylation	62064.3	Keratin, type I cytoskeletal 9 OS=Homo sapiens OX=9606 GN=KRT9 PE=1 SV=3
6	TRUE	P35908|K22E_HUMAN	573.176	146	2	223	536	2.40359	1727	215	0.124493	200	78	0.39	173	69	0.398844	433	314	0.725173	747	1174	1.57162	Oxidation (M); Carbamidomethylation	65432.9	Keratin, type II cytoskeletal 2 epidermal OS=Homo sapiens OX=9606 GN=KRT2 PE=1 SV=2
2136	TRUE	Q8TED4|G6PT3_HUMAN	143.347	3	3	5	12	2.4	2	13	6.5							11	11	1	4	14	3.5	Carbamidomethylation	54436.5	Glucose-6-phosphate exchanger SLC37A2 OS=Homo sapiens OX=9606 GN=SLC37A2 PE=2 SV=2
1276	TRUE	Q13568|IRF5_HUMAN	207.293	8	8	5	12	2.4	18	28	1.55556		2	2		7	7	7	20	2.85714	23	21	0.913043	Carbamidomethylation	56044.1	Interferon regulatory factor 5 OS=Homo sapiens OX=9606 GN=IRF5 PE=1 SV=2
1425	TRUE	P26006|ITA3_HUMAN	195.641	7	7	13	31	2.38462		9	9							5	28	5.6		17	17	Carbamidomethylation	116612	Integrin alpha-3 OS=Homo sapiens OX=9606 GN=ITGA3 PE=1 SV=5
1334	TRUE	P51692|STA5B_HUMAN	202.991	13	1	20	27	1.35	30	58	1.93333	1	3	3	8	6	0.75	8	13	1.625	5	23	4.6		89865.9	Signal transducer and activator of transcription 5B OS=Homo sapiens OX=9606 GN=STAT5B PE=1 SV=2
579	TRUE	O00560|SDCB1_HUMAN	279.95	11	11	29	68	2.34483	22	70	3.18182	17	59	3.47059	29	145	5	34	67	1.97059	29	70	2.41379	Carbamidomethylation; Oxidation (M)	32444.4	Syntenin-1 OS=Homo sapiens OX=9606 GN=SDCBP PE=1 SV=1
1794	TRUE	Q9H1B7|I2BPL_HUMAN	165.367	5	5	3	7	2.33333	1	14	14				1	2	2		9	9		5	5	Carbamidomethylation	82658.8	Probable E3 ubiquitin-protein ligase IRF2BPL OS=Homo sapiens OX=9606 GN=IRF2BPL PE=1 SV=1
2819	TRUE	Q6P3W7|SCYL2_HUMAN	97.1246	2	2	3	7	2.33333	10	9	0.9							6	4	0.666667	2	6	3		103709	SCY1-like protein 2 OS=Homo sapiens OX=9606 GN=SCYL2 PE=1 SV=1
2965	TRUE	P78406|RAE1L_HUMAN	87.1426	1	1	6	12	2	5	9	1.8		1	1	2			3	7	2.33333	2	9	4.5		40968.2	mRNA export factor OS=Homo sapiens OX=9606 GN=RAE1 PE=1 SV=1
2810	TRUE	Q8WXA9|SREK1_HUMAN	97.2686	2	2	3	7	2.33333	4	5	1.25		1	1				3	5	1.66667	2	4	2		59380.3	Splicing regulatory glutamine/lysine-rich protein 1 OS=Homo sapiens OX=9606 GN=SREK1 PE=1 SV=1
2470	TRUE	P11171|EPB41_HUMAN	118.424	5	3	3	7	2.33333	3	10	3.33333					2	2	9	20	2.22222	6	11	1.83333	Carbamidomethylation	97016.9	Protein 4.1 OS=Homo sapiens OX=9606 GN=EPB41 PE=1 SV=4
1518	TRUE	P13674|P4HA1_HUMAN	188.408	9	9	6	14	2.33333		13	13	19	18	0.947368	5	19	3.8	23	31	1.34783	9	14	1.55556	Carbamidomethylation	61049.3	Prolyl 4-hydroxylase subunit alpha-1 OS=Homo sapiens OX=9606 GN=P4HA1 PE=1 SV=2
1666	TRUE	P22033|MUTA_HUMAN	175.149	9	9	6	14	2.33333	6	11	1.83333					1	1	13	19	1.46154	10	11	1.1		83134.4	Methylmalonyl-CoA mutase, mitochondrial OS=Homo sapiens OX=9606 GN=MMUT PE=1 SV=4
2426	TRUE	O95758|PTBP3_HUMAN	121.322	4	4	3	7	2.33333	4	3	0.75											1	1		59689.5	Polypyrimidine tract-binding protein 3 OS=Homo sapiens OX=9606 GN=PTBP3 PE=1 SV=2
88	TRUE	P11717|MPRI_HUMAN	397.288	49	49	26	60	2.30769	106	239	2.25472	2			11	39	3.54545	13	35	2.69231	63	158	2.50794	Carbamidomethylation; Oxidation (M)	274375	Cation-independent mannose-6-phosphate receptor OS=Homo sapiens OX=9606 GN=IGF2R PE=1 SV=3
910	TRUE	Q12907|LMAN2_HUMAN	241.648	10	10	13	30	2.30769	13	28	2.15385	11	8	0.727273		18	18	17	12	0.705882	14	18	1.28571	Carbamidomethylation; Oxidation (M)	40228.7	Vesicular integral-membrane protein VIP36 OS=Homo sapiens OX=9606 GN=LMAN2 PE=1 SV=1
667	TRUE	Q92621|NU205_HUMAN	266.956	28	28	20	46	2.3	17	102	6					2	2	1	18	18	2	26	13	Carbamidomethylation	227922	Nuclear pore complex protein Nup205 OS=Homo sapiens OX=9606 GN=NUP205 PE=1 SV=3
1390	TRUE	Q9UHG3|PCYOX_HUMAN	198.574	7	7	7	16	2.28571	11	16	1.45455	1				1	1	8	15	1.875	13	22	1.69231		56640.1	Prenylcysteine oxidase 1 OS=Homo sapiens OX=9606 GN=PCYOX1 PE=1 SV=3
1720	TRUE	Q9NRX5|SERC1_HUMAN	170.469	4	4	4	9	2.25		29	29	1	6	6		20	20	4	10	2.5		16	16	Carbamidomethylation	50494.9	Serine incorporator 1 OS=Homo sapiens OX=9606 GN=SERINC1 PE=1 SV=1
613	TRUE	Q92538|GBF1_HUMAN	275.575	27	27	24	54	2.25	7	88	12.5714		4	4		7	7	4	38	9.5	3	39	13	Carbamidomethylation	206446	Golgi-specific brefeldin A-resistance guanine nucleotide exchange factor 1 OS=Homo sapiens OX=9606 GN=GBF1 PE=1 SV=2
1001	TRUE	P49736|MCM2_HUMAN	232.567	13	13	12	27	2.25		23	23		1	1		1	1	4	47	11.75		12	12	Carbamidomethylation	101896	DNA replication licensing factor MCM2 OS=Homo sapiens OX=9606 GN=MCM2 PE=1 SV=4
2779	TRUE	Q6NUK4|REEP3_HUMAN	99.1769	2	2	4	9	2.25	6			1				2	2		2	2		1	1		29263.9	Receptor expression-enhancing protein 3 OS=Homo sapiens OX=9606 GN=REEP3 PE=1 SV=1
1817	TRUE	P17813|EGLN_HUMAN	164.22	6	6	4	9	2.25	3	7	2.33333		3	3		26	26	13	2	0.153846	3			Carbamidomethylation	70578.1	Endoglin OS=Homo sapiens OX=9606 GN=ENG PE=1 SV=2
289	TRUE	P28331|NDUS1_HUMAN	327.244	23	23	50	111	2.22	63	134	2.12698	2	80	40		105	105	65	124	1.90769	61	82	1.34426	Carbamidomethylation	79467.5	NADH-ubiquinone oxidoreductase 75 kDa subunit, mitochondrial OS=Homo sapiens OX=9606 GN=NDUFS1 PE=1 SV=3
1932	TRUE	Q16204|CCDC6_HUMAN	156.943	6	6	5	11	2.2	4	12	3		2	2				2	6	3		12	12		53290.9	Coiled-coil domain-containing protein 6 OS=Homo sapiens OX=9606 GN=CCDC6 PE=1 SV=2
2510	TRUE	Q68DK2|ZFY26_HUMAN	115.94	4	4	5	11	2.2	7	8	1.14286							2	3	1.5		3	3	Carbamidomethylation	284576	Zinc finger FYVE domain-containing protein 26 OS=Homo sapiens OX=9606 GN=ZFYVE26 PE=1 SV=3
3140	TRUE	Q8N5M9|JAGN1_HUMAN	76.8263	1	1				2	2	1		3	3		8	8		5	5	1	4	4		21125	Protein jagunal homolog 1 OS=Homo sapiens OX=9606 GN=JAGN1 PE=1 SV=1
203	TRUE	P15924|DESP_HUMAN	351.775	44	44	5	11	2.2	198									40	7	0.175	25	39	1.56	Oxidation (M)	331774	Desmoplakin OS=Homo sapiens OX=9606 GN=DSP PE=1 SV=3
1624	TRUE	Q9UKV3|ACINU_HUMAN	178.986	7	7	5	11	2.2	13	12	0.923077	1				3	3	10	11	1.1	16	8	0.5	Carbamidomethylation	151862	Apoptotic chromatin condensation inducer in the nucleus OS=Homo sapiens OX=9606 GN=ACIN1 PE=1 SV=2
1188	TRUE	Q9UBF2|COPG2_HUMAN	215.383	10	6	11	24	2.18182	12	25	2.08333	5	5	1	7	10	1.42857	20	19	0.95	11	30	2.72727	Carbamidomethylation	97622.3	Coatomer subunit gamma-2 OS=Homo sapiens OX=9606 GN=COPG2 PE=1 SV=1
1562	TRUE	O43681|GET3_HUMAN	184.714	7	7	11	24	2.18182	14	32	2.28571	13	8	0.615385	5	17	3.4	30	28	0.933333	32	31	0.96875	Carbamidomethylation	38792.8	ATPase GET3 OS=Homo sapiens OX=9606 GN=GET3 PE=1 SV=2
953	TRUE	Q9P2D3|HTR5B_HUMAN	237.598	16	15	6	13	2.16667	9	38	4.22222							3	8	2.66667	1	9	9		224302	HEAT repeat-containing protein 5B OS=Homo sapiens OX=9606 GN=HEATR5B PE=1 SV=2
610	TRUE	Q8TEM1|PO210_HUMAN	275.9	19	19	24	52	2.16667	22	51	2.31818							34	32	0.941176	17	29	1.70588	Carbamidomethylation	205111	Nuclear pore membrane glycoprotein 210 OS=Homo sapiens OX=9606 GN=NUP210 PE=1 SV=3
219	TRUE	Q13231|CHIT1_HUMAN	346.663	23	23	44	95	2.15909	26	108	4.15385	1	3	3		10	10	89	182	2.04494	73	156	2.13699	Carbamidomethylation; Oxidation (M)	51681.3	Chitotriosidase-1 OS=Homo sapiens OX=9606 GN=CHIT1 PE=1 SV=1
965	TRUE	Q8TCU6|PREX1_HUMAN	236.107	16	16	7	15	2.14286	15	37	2.46667		2	2				2	7	3.5	3	15	5	Carbamidomethylation	186203	Phosphatidylinositol 3,4,5-trisphosphate-dependent Rac exchanger 1 protein OS=Homo sapiens OX=9606 GN=PREX1 PE=1 SV=3
1260	TRUE	Q14571|ITPR2_HUMAN	208.519	9	6	7	15	2.14286	10	26	2.6							15	22	1.46667	5	23	4.6	Carbamidomethylation	308064	Inositol 1,4,5-trisphosphate receptor type 2 OS=Homo sapiens OX=9606 GN=ITPR2 PE=1 SV=2
801	TRUE	P61011|SRP54_HUMAN	252.457	13	13	14	30	2.14286	5	41	8.2	4	17	4.25	1	14	14	31	52	1.67742	18	66	3.66667	Oxidation (M); Carbamidomethylation	55704.7	Signal recognition particle 54 kDa protein OS=Homo sapiens OX=9606 GN=SRP54 PE=1 SV=1
3021	TRUE	Q9Y333|LSM2_HUMAN	83.7821	1	1	3			8							5	5	1	2	2		4	4		10834.5	U6 snRNA-associated Sm-like protein LSm2 OS=Homo sapiens OX=9606 GN=LSM2 PE=1 SV=1
829	TRUE	O15118|NPC1_HUMAN	249.744	10	10	8	17	2.125	19	43	2.26316	2	5	2.5		22	22	11	18	1.63636	12	27	2.25	Carbamidomethylation	142167	NPC intracellular cholesterol transporter 1 OS=Homo sapiens OX=9606 GN=NPC1 PE=1 SV=2
2995	FALSE	Q9H2L5|RASF4_HUMAN	59.5735	1	1				1	2	2					3	3	2	4	2		4	4		36748.2	Ras association domain-containing protein 4 OS=Homo sapiens OX=9606 GN=RASSF4 PE=1 SV=2
1065	FALSE	O60911|CATL2_HUMAN	64.8288	1	1	2	5	2.5	2	4	2	3	8	2.66667	3	8	2.66667	1	2	2	1	4	4		37329.3	Cathepsin L2 OS=Homo sapiens OX=9606 GN=CTSV PE=1 SV=2
914	TRUE	Q9Y6D6|BIG1_HUMAN	241.148	18	13	17	36	2.11765	12	36	3					4	4	15	15	1	7	15	2.14286	Carbamidomethylation	208767	Brefeldin A-inhibited guanine nucleotide-exchange protein 1 OS=Homo sapiens OX=9606 GN=ARFGEF1 PE=1 SV=2
1506	TRUE	Q10471|GALT2_HUMAN	189.638	7	7	9	19	2.11111	9	27	3							14	17	1.21429	6	19	3.16667	Carbamidomethylation	64732.8	Polypeptide N-acetylgalactosaminyltransferase 2 OS=Homo sapiens OX=9606 GN=GALNT2 PE=1 SV=1
1976	TRUE	O00757|F16P2_HUMAN	153.732	4	3	35	73	2.08571	20	51	2.55	49	72	1.46939	51	60	1.17647	78	74	0.948718	98	72	0.734694	Oxidation (M)	36743.2	Fructose-1,6-bisphosphatase isozyme 2 OS=Homo sapiens OX=9606 GN=FBP2 PE=1 SV=2
413	FALSE	Q9Y5S8|NOX1_HUMAN	157.883	4	4	12	25	2.08333	15	25	1.66667	9	15	1.66667	11	15	1.36364	13	16	1.23077	23	22	0.956522	Carbamidomethylation	64871	NADPH oxidase 1 OS=Homo sapiens OX=9606 GN=NOX1 PE=1 SV=2
586	TRUE	Q15366|PCBP2_HUMAN	279.054	13	10	53	110	2.07547	63	159	2.52381	66	106	1.60606	60	117	1.95	123	175	1.42276	88	193	2.19318	Carbamidomethylation; Oxidation (M)	38580.1	Poly(rC)-binding protein 2 OS=Homo sapiens OX=9606 GN=PCBP2 PE=1 SV=1
1192	TRUE	Q9ULT8|HECD1_HUMAN	215.296	14	14	14	29	2.07143	13	32	2.46154					2	2	15	13	0.866667	2	17	8.5	Carbamidomethylation	289384	E3 ubiquitin-protein ligase HECTD1 OS=Homo sapiens OX=9606 GN=HECTD1 PE=1 SV=3
966	TRUE	P61769|B2MG_HUMAN	236.042	8	8	30	62	2.06667	47	49	1.04255	18	15	0.833333	22	34	1.54545	15	13	0.866667	16	15	0.9375	Carbamidomethylation	13714.6	Beta-2-microglobulin OS=Homo sapiens OX=9606 GN=B2M PE=1 SV=1
1421	TRUE	P10620|MGST1_HUMAN	196.534	6	6	16	33	2.0625	36	38	1.05556	7	18	2.57143		21	21	13	19	1.46154	7	17	2.42857	Carbamidomethylation; Oxidation (M)	17598.7	Microsomal glutathione S-transferase 1 OS=Homo sapiens OX=9606 GN=MGST1 PE=1 SV=1
3636	TRUE	Q9Y282|ERGI3_HUMAN	49.5255	1	1														2	2	1	4	4	Carbamidomethylation	43222.4	Endoplasmic reticulum-Golgi intermediate compartment protein 3 OS=Homo sapiens OX=9606 GN=ERGIC3 PE=1 SV=1
1426	TRUE	Q9H444|CHM4B_HUMAN	195.488	6	6	23	47	2.04348	28	26	0.928571	19	17	0.894737	24	14	0.583333	12	22	1.83333	12	23	1.91667		24950.2	Charged multivesicular body protein 4b OS=Homo sapiens OX=9606 GN=CHMP4B PE=1 SV=1
164	TRUE	O75533|SF3B1_HUMAN	362.315	37	37	84	171	2.03571	108	201	1.86111	19	34	1.78947	3	39	13	42	140	3.33333	39	165	4.23077	Oxidation (M); Carbamidomethylation	145830	Splicing factor 3B subunit 1 OS=Homo sapiens OX=9606 GN=SF3B1 PE=1 SV=3
246	TRUE	P10321|HLAC_HUMAN	337.669	18	7	40	81	2.025	84	198	2.35714	56	76	1.35714	46	229	4.97826	51	78	1.52941	56	126	2.25	Carbamidomethylation	40648.5	HLA class I histocompatibility antigen, C alpha chain OS=Homo sapiens OX=9606 GN=HLA-C PE=1 SV=3
115	TRUE	P04439|HLAA_HUMAN	382.781	23	9	75	151	2.01333	140	423	3.02143	56	107	1.91071	57	240	4.21053	117	187	1.59829	121	298	2.46281	Carbamidomethylation; Oxidation (M)	40840.7	HLA class I histocompatibility antigen, A alpha chain OS=Homo sapiens OX=9606 GN=HLA-A PE=1 SV=2
1965	TRUE	Q9Y3E5|PTH2_HUMAN	154.799	5	5		2	2	8			3						4	2	0.5		13	13		19193.5	Peptidyl-tRNA hydrolase 2, mitochondrial OS=Homo sapiens OX=9606 GN=PTRH2 PE=1 SV=1
2272	TRUE	Q9NW64|RBM22_HUMAN	134.235	3	3	1	2	2	5	20	4										1	13	13		46895.6	Pre-mRNA-splicing factor RBM22 OS=Homo sapiens OX=9606 GN=RBM22 PE=1 SV=1
1215	TRUE	P33908|MA1A1_HUMAN	211.991	9	9		2	2		31	31					1	1		5	5		12	12		72968.5	Mannosyl-oligosaccharide 1,2-alpha-mannosidase IA OS=Homo sapiens OX=9606 GN=MAN1A1 PE=1 SV=3
1927	TRUE	P43155|CACP_HUMAN	157.234	6	6		2	2		31	31					10	10					12	12	Carbamidomethylation	70857.6	Carnitine O-acetyltransferase OS=Homo sapiens OX=9606 GN=CRAT PE=1 SV=5
2630	TRUE	Q8TBP6|S2540_HUMAN	108.847	2	2		2	2		19	19								7	7		11	11		38124.8	Solute carrier family 25 member 40 OS=Homo sapiens OX=9606 GN=SLC25A40 PE=1 SV=1
2263	TRUE	P49768|PSN1_HUMAN	134.706	3	3	2	4	2	4	20	5	1	4	4		33	33	3	9	3	2	21	10.5		52667.8	Presenilin-1 OS=Homo sapiens OX=9606 GN=PSEN1 PE=1 SV=1
1732	TRUE	Q9UJW0|DCTN4_HUMAN	170.057	6	6		2	2	2	23	11.5		1	1		11	11	3	10	3.33333	2	19	9.5	Carbamidomethylation	52337.1	Dynactin subunit 4 OS=Homo sapiens OX=9606 GN=DCTN4 PE=1 SV=1
2454	TRUE	P51178|PLCD1_HUMAN	119.776	5	5		2	2		2	2								2	2		9	9	Carbamidomethylation	85665	1-phosphatidylinositol 4,5-bisphosphate phosphodiesterase delta-1 OS=Homo sapiens OX=9606 GN=PLCD1 PE=1 SV=2
141	FALSE	P08253|MMP2_HUMAN	80.1297	2	2		2	2		5	5								6	6		8	8	Carbamidomethylation	73882.3	72 kDa type IV collagenase OS=Homo sapiens OX=9606 GN=MMP2 PE=1 SV=2
2754	TRUE	O43920|NDUS5_HUMAN	100.664	2	2	1	2	2	11	3	0.272727							2	3	1.5	1	8	8	Carbamidomethylation	12517.5	NADH dehydrogenase [ubiquinone] iron-sulfur protein 5 OS=Homo sapiens OX=9606 GN=NDUFS5 PE=1 SV=3
2715	TRUE	O00214|LEG8_HUMAN	102.6	4	3		2	2		3	3								1	1		8	8		35808.1	Galectin-8 OS=Homo sapiens OX=9606 GN=LGALS8 PE=1 SV=4
2809	TRUE	P78383|S35B1_HUMAN	97.2793	2	2		2	2		8	8	1			1	1	1		3	3		7	7	Carbamidomethylation	35759.6	Solute carrier family 35 member B1 OS=Homo sapiens OX=9606 GN=SLC35B1 PE=1 SV=1
2245	TRUE	Q92562|FIG4_HUMAN	136.15	3	3	1	2	2	1	5	5							8	9	1.125	2	13	6.5		103635	Polyphosphoinositide phosphatase OS=Homo sapiens OX=9606 GN=FIG4 PE=1 SV=1
2806	TRUE	Q96K49|TM87B_HUMAN	97.3714	2	2		2	2		7	7					6	6		9	9		6	6	Carbamidomethylation	63536.2	Transmembrane protein 87B OS=Homo sapiens OX=9606 GN=TMEM87B PE=1 SV=1
2581	TRUE	Q9Y6I3|EPN1_HUMAN	111.632	2	2		2	2	1	4	4					7	7	3	21	7		6	6		60293.3	Epsin-1 OS=Homo sapiens OX=9606 GN=EPN1 PE=1 SV=2
3711	TRUE	Q9Y279|VSIG4_HUMAN	45.9384	1	1					6	6								1	1		4	4		43987.1	V-set and immunoglobulin domain-containing protein 4 OS=Homo sapiens OX=9606 GN=VSIG4 PE=1 SV=1
3009	TRUE	Q6NXT6|TAPT1_HUMAN	84.4426	2	2		2	2		5	5		1	1					6	6		6	6		64259.6	Transmembrane anterior posterior transformation protein 1 homolog OS=Homo sapiens OX=9606 GN=TAPT1 PE=1 SV=1
3433	TRUE	P54849|EMP1_HUMAN	59.5991	1	1	2	4	2	4	4	1	7						5	5	1		4	4		17562.9	Epithelial membrane protein 1 OS=Homo sapiens OX=9606 GN=EMP1 PE=1 SV=3
2513	TRUE	Q96S52|PIGS_HUMAN	115.674	3	3	1	2	2		4	4	1	1	1				1	6	6	1	6	6		61656.2	GPI transamidase component PIG-S OS=Homo sapiens OX=9606 GN=PIGS PE=1 SV=3
3331	TRUE	Q8TEV9|SMCR8_HUMAN	64.6121	1	1														1	1		4	4		105022	Guanine nucleotide exchange protein SMCR8 OS=Homo sapiens OX=9606 GN=SMCR8 PE=1 SV=2
2069	TRUE	Q5VW36|FOCAD_HUMAN	147.249	4	4	1	2	2		2	2							1	4	4		6	6		200072	Focadhesin OS=Homo sapiens OX=9606 GN=FOCAD PE=1 SV=1
2495	TRUE	Q7Z5K2|WAPL_HUMAN	116.713	4	4		2	2		4	4		1	1					2	2	1	6	6		132946	Wings apart-like protein homolog OS=Homo sapiens OX=9606 GN=WAPL PE=1 SV=1
2324	TRUE	O43264|ZW10_HUMAN	129.599	6	6		2	2	2	7	3.5					1	1	6	3	0.5	1	6	6	Carbamidomethylation	88829.5	Centromere/kinetochore protein zw10 homolog OS=Homo sapiens OX=9606 GN=ZW10 PE=1 SV=3
1811	TRUE	Q9P265|DIP2B_HUMAN	164.487	8	8	9	18	2	6	39	6.5		6	6		9	9	10	31	3.1	7	40	5.71429	Carbamidomethylation	171492	Disco-interacting protein 2 homolog B OS=Homo sapiens OX=9606 GN=DIP2B PE=1 SV=3
2602	TRUE	P23193|TCEA1_HUMAN	110.567	3	3		2	2	1	7	7					5	5		5	5	3	15	5	Carbamidomethylation	33969.6	Transcription elongation factor A protein 1 OS=Homo sapiens OX=9606 GN=TCEA1 PE=1 SV=2
2904	TRUE	Q6N069|NAA16_HUMAN	91.7121	3	1	8	5	0.625	9	4	0.444444	1	1	1		1	1	6	4	0.666667	1	4	4		101462	N-alpha-acetyltransferase 16, NatA auxiliary subunit OS=Homo sapiens OX=9606 GN=NAA16 PE=1 SV=2
2602	FALSE	Q15560|TCEA2_HUMAN	96.7925	2	2		2	2	1	6	6					5	5		5	5	3	15	5	Carbamidomethylation	33600.8	Transcription elongation factor A protein 2 OS=Homo sapiens OX=9606 GN=TCEA2 PE=1 SV=1
2249	TRUE	Q96RE7|NACC1_HUMAN	135.866	5	5		2	2		1	1					1	1		4	4		5	5	Carbamidomethylation	57258.2	Nucleus accumbens-associated protein 1 OS=Homo sapiens OX=9606 GN=NACC1 PE=1 SV=1
1291	TRUE	Q7Z392|TPC11_HUMAN	206.147	9	9	3	6	2	3	16	5.33333					2	2	4	12	3	3	15	5		128881	Trafficking protein particle complex subunit 11 OS=Homo sapiens OX=9606 GN=TRAPPC11 PE=1 SV=2
2540	TRUE	O15355|PPM1G_HUMAN	113.903	3	3	1	2	2		4	4					1	1	2	5	2.5		5	5		59271.6	Protein phosphatase 1G OS=Homo sapiens OX=9606 GN=PPM1G PE=1 SV=1
2900	TRUE	O00399|DCTN6_HUMAN	91.9883	2	2	1	2	2	2	1	0.5	4	2	0.5		5	5		2	2	1	5	5	Carbamidomethylation	20747	Dynactin subunit 6 OS=Homo sapiens OX=9606 GN=DCTN6 PE=1 SV=1
1884	FALSE	Q5T2N8|ATD3C_HUMAN	97.1951	2	1	1	1	1	1	1	1							3	1	0.333333	1	4	4		46379.5	ATPase family AAA domain-containing protein 3C OS=Homo sapiens OX=9606 GN=ATAD3C PE=2 SV=2
1780	TRUE	Q86VS8|HOOK3_HUMAN	166.309	6	6	1	2	2	1	12	12				1	2	2	3	4	1.33333	2	10	5		83125.8	Protein Hook homolog 3 OS=Homo sapiens OX=9606 GN=HOOK3 PE=1 SV=2
1635	TRUE	Q03013|GSTM4_HUMAN	178.087	4	4		2	2				5	8	1.6	1	6	6	11	14	1.27273	1	5	5		25561.4	Glutathione S-transferase Mu 4 OS=Homo sapiens OX=9606 GN=GSTM4 PE=1 SV=3
3158	TRUE	Q9Y2Y9|KLF13_HUMAN	75.6106	1	1											10	10					4	4		31179.9	Krueppel-like factor 13 OS=Homo sapiens OX=9606 GN=KLF13 PE=1 SV=1
1635	FALSE	P09488|GSTM1_HUMAN	135.006	2	2		2	2				5	8	1.6	1	6	6	8	9	1.125	1	5	5		25711.8	Glutathione S-transferase Mu 1 OS=Homo sapiens OX=9606 GN=GSTM1 PE=1 SV=3
1021	FALSE	Q9H9S3|S61A2_HUMAN	120.009	3	3		2	2	1	6	6					2	2	1	1	1		5	5	Carbamidomethylation	52247.8	Protein transport protein Sec61 subunit alpha isoform 2 OS=Homo sapiens OX=9606 GN=SEC61A2 PE=2 SV=3
2369	TRUE	P23497|SP100_HUMAN	125.537	4	3		2	2	1	11	11	12	9	0.75		2	2	3	2	0.666667	1	5	5	Carbamidomethylation	100417	Nuclear autoantigen Sp-100 OS=Homo sapiens OX=9606 GN=SP100 PE=1 SV=3
3006	TRUE	O75427|LRCH4_HUMAN	84.5812	2	2	1	2	2	6	3	0.5							4	2	0.5	1	5	5		73450.3	Leucine-rich repeat and calponin homology domain-containing protein 4 OS=Homo sapiens OX=9606 GN=LRCH4 PE=1 SV=2
2446	TRUE	Q9UM00|TMCO1_HUMAN	120.552	2	2	3	6	2	5	4	0.8				1	6	6	2	8	4	2	9	4.5		27079	Calcium load-activated calcium channel OS=Homo sapiens OX=9606 GN=TMCO1 PE=1 SV=2
1839	TRUE	Q12996|CSTF3_HUMAN	162.744	5	5	3	6	2	7	10	1.42857	2				1	1	4	6	1.5	2	9	4.5		82921.6	Cleavage stimulation factor subunit 3 OS=Homo sapiens OX=9606 GN=CSTF3 PE=1 SV=1
3319	TRUE	Q8WV19|SFT2A_HUMAN	65.5132	1	1	4	3	0.75		2	2											4	4		17804.4	Vesicle transport protein SFT2A OS=Homo sapiens OX=9606 GN=SFT2D1 PE=1 SV=1
2832	TRUE	P18433|PTPRA_HUMAN	96.5125	3	2		2	2		1	1							2	3	1.5		4	4	Carbamidomethylation	90719.1	Receptor-type tyrosine-protein phosphatase alpha OS=Homo sapiens OX=9606 GN=PTPRA PE=1 SV=3
2399	TRUE	P48200|IREB2_HUMAN	123.061	4	4	2	4	2	2	3	1.5							5	7	1.4		4	4	Carbamidomethylation	105059	Iron-responsive element-binding protein 2 OS=Homo sapiens OX=9606 GN=IREB2 PE=1 SV=4
3515	FALSE	Q6STE5|SMRD3_HUMAN	38.2912	1	1					1	1							1				4	4		55015.9	SWI/SNF-related matrix-associated actin-dependent regulator of chromatin subfamily D member 3 OS=Homo sapiens OX=9606 GN=SMARCD3 PE=1 SV=1
3515	FALSE	Q96GM5|SMRD1_HUMAN	38.2912	1	1					1	1							1				4	4		58232.5	SWI/SNF-related matrix-associated actin-dependent regulator of chromatin subfamily D member 1 OS=Homo sapiens OX=9606 GN=SMARCD1 PE=1 SV=2
1907	FALSE	O43731|ERD23_HUMAN	95.2964	2	2		2	2	6	8	1.33333	1			3	1	0.333333		1	1		4	4		25026.8	ER lumen protein-retaining receptor 3 OS=Homo sapiens OX=9606 GN=KDELR3 PE=1 SV=1
3127	TRUE	O95671|ASML_HUMAN	77.8266	1	1	2			2	2	1							4				4	4		68856.7	Probable bifunctional dTTP/UTP pyrophosphatase/methyltransferase protein OS=Homo sapiens OX=9606 GN=ASMTL PE=1 SV=3
2374	TRUE	Q99436|PSB7_HUMAN	125.075	5	5	2	4	2	3	4	1.33333							7	4	0.571429	1	4	4	Carbamidomethylation	29965.4	Proteasome subunit beta type-7 OS=Homo sapiens OX=9606 GN=PSMB7 PE=1 SV=1
3472	TRUE	P25105|PTAFR_HUMAN	57.3642	1	1																	4	4		39203.4	Platelet-activating factor receptor OS=Homo sapiens OX=9606 GN=PTAFR PE=1 SV=1
3672	TRUE	Q6N075|MFSD5_HUMAN	47.6287	1	1																	4	4		49764.6	Molybdate-anion transporter OS=Homo sapiens OX=9606 GN=MFSD5 PE=1 SV=2
3357	TRUE	Q53RT3|APRV1_HUMAN	63.7313	1	1													1				4	4		36991.1	Retroviral-like aspartic protease 1 OS=Homo sapiens OX=9606 GN=ASPRV1 PE=1 SV=1
3107	TRUE	Q96RQ1|ERGI2_HUMAN	78.8277	1	1																1	4	4		42548.7	Endoplasmic reticulum-Golgi intermediate compartment protein 2 OS=Homo sapiens OX=9606 GN=ERGIC2 PE=1 SV=2
3550	TRUE	O75381|PEX14_HUMAN	53.8743	1	1																1	4	4		41236.6	Peroxisomal membrane protein PEX14 OS=Homo sapiens OX=9606 GN=PEX14 PE=1 SV=1
3126	TRUE	P42357|HUTH_HUMAN	77.8434	1	1				1												1	4	4		72697.6	Histidine ammonia-lyase OS=Homo sapiens OX=9606 GN=HAL PE=1 SV=1
2391	TRUE	Q14558|KPRA_HUMAN	123.517	4	4		2	2	1	9	9	2			1	1	1		4	4	1	3	3		39393.7	Phosphoribosyl pyrophosphate synthase-associated protein 1 OS=Homo sapiens OX=9606 GN=PRPSAP1 PE=1 SV=2
2400	TRUE	Q9NX47|MARH5_HUMAN	123.034	3	3		2	2	2	11	5.5								4	4		3	3	Carbamidomethylation	31231.7	E3 ubiquitin-protein ligase MARCHF5 OS=Homo sapiens OX=9606 GN=MARCHF5 PE=1 SV=1
147	FALSE	P20742|PZP_HUMAN	120.453	3	3		2	2		17	17								2	2		3	3		163863	Pregnancy zone protein OS=Homo sapiens OX=9606 GN=PZP PE=1 SV=4
2508	TRUE	Q13884|SNTB1_HUMAN	115.991	5	5		2	2	3	3	1							3	5	1.66667	3	9	3	Carbamidomethylation	58061.1	Beta-1-syntrophin OS=Homo sapiens OX=9606 GN=SNTB1 PE=1 SV=3
2903	TRUE	Q5JSH3|WDR44_HUMAN	91.7296	3	3		2	2	1	2	2							8	8	1	2	6	3		101366	WD repeat-containing protein 44 OS=Homo sapiens OX=9606 GN=WDR44 PE=1 SV=1
2312	TRUE	Q8NB37|GALD1_HUMAN	130.732	4	4	2	4	2	6	3	0.5								1	1		3	3	Carbamidomethylation	23297.5	Glutamine amidotransferase-like class 1 domain-containing protein 1 OS=Homo sapiens OX=9606 GN=GATD1 PE=1 SV=1
1586	TRUE	Q7Z4Q2|HEAT3_HUMAN	182.556	7	7	4	8	2	7	12	1.71429	9	4	0.444444		6	6	12	16	1.33333	4	11	2.75	Carbamidomethylation	74582.7	HEAT repeat-containing protein 3 OS=Homo sapiens OX=9606 GN=HEATR3 PE=1 SV=2
2184	TRUE	Q9NTJ4|MA2C1_HUMAN	140.207	7	7		2	2	2	15	7.5							11	5	0.454545	4	11	2.75	Carbamidomethylation	115835	Alpha-mannosidase 2C1 OS=Homo sapiens OX=9606 GN=MAN2C1 PE=1 SV=1
2130	TRUE	Q13094|LCP2_HUMAN	143.854	5	5	6	12	2	22	12	0.545455				5	2	0.4	3	1	0.333333	3	8	2.66667		60188.2	Lymphocyte cytosolic protein 2 OS=Homo sapiens OX=9606 GN=LCP2 PE=1 SV=1
924	TRUE	P29590|PML_HUMAN	240.585	13	13	1	2	2	40	66	1.65		1	1	1	25	25	1	7	7	16	41	2.5625	Carbamidomethylation	97550.6	Protein PML OS=Homo sapiens OX=9606 GN=PML PE=1 SV=3
2162	TRUE	Q9Y2S2|CRYL1_HUMAN	141.784	5	5	6	12	2	3	7	2.33333		2	2	1	2	2	9	12	1.33333	6	15	2.5		35419.2	Lambda-crystallin homolog OS=Homo sapiens OX=9606 GN=CRYL1 PE=1 SV=3
1994	TRUE	O43432|IF4G3_HUMAN	152.216	5	3	4	8	2	7	4	0.571429	3						11	10	0.909091	5	11	2.2	Oxidation (M); Carbamidomethylation	176652	Eukaryotic translation initiation factor 4 gamma 3 OS=Homo sapiens OX=9606 GN=EIF4G3 PE=1 SV=2
2644	TRUE	O95168|NDUB4_HUMAN	108.234	3	3		2	2		10	10					10	10		8	8		2	2		15208.6	NADH dehydrogenase [ubiquinone] 1 beta subcomplex subunit 4 OS=Homo sapiens OX=9606 GN=NDUFB4 PE=1 SV=3
2003	TRUE	Q15843|NEDD8_HUMAN	151.524	3	3	12	24	2	15	12	0.8	13	7	0.538462		7	7	2	9	4.5	5	10	2		9071.55	NEDD8 OS=Homo sapiens OX=9606 GN=NEDD8 PE=1 SV=1
3189	TRUE	P82933|RT09_HUMAN	72.709	2	2		2	2		3	3					3	3		4	4		2	2	Carbamidomethylation	45834.8	28S ribosomal protein S9, mitochondrial OS=Homo sapiens OX=9606 GN=MRPS9 PE=1 SV=2
2480	TRUE	Q8NF37|PCAT1_HUMAN	117.822	2	2	1	2	2		1	1							3	8	2.66667	1	2	2	Carbamidomethylation	59151.3	Lysophosphatidylcholine acyltransferase 1 OS=Homo sapiens OX=9606 GN=LPCAT1 PE=1 SV=2
2539	TRUE	P11161|EGR2_HUMAN	113.943	2	2		2	2		11	11	2	9	4.5		14	14		2	2	1	2	2		50301.7	E3 SUMO-protein ligase EGR2 OS=Homo sapiens OX=9606 GN=EGR2 PE=1 SV=3
1671	TRUE	O60762|DPM1_HUMAN	174.961	6	6	7	14	2	7	14	2	2	2	1		1	1	15	24	1.6	12	24	2		29634.3	Dolichol-phosphate mannosyltransferase subunit 1 OS=Homo sapiens OX=9606 GN=DPM1 PE=1 SV=1
2023	TRUE	Q9UN86|G3BP2_HUMAN	150.202	4	4	7	14	2	10	18	1.8		4	4		2	2	2	2	1	3	6	2		54121.1	Ras GTPase-activating protein-binding protein 2 OS=Homo sapiens OX=9606 GN=G3BP2 PE=1 SV=2
2530	TRUE	Q15629|TRAM1_HUMAN	114.685	3	3		2	2	2	2	1	1	2	2	12	6	0.5	2	2	1	2	4	2		43071.6	Translocating chain-associated membrane protein 1 OS=Homo sapiens OX=9606 GN=TRAM1 PE=1 SV=3
3142	TRUE	O75170|PP6R2_HUMAN	76.6684	3	3		2	2	3										1	1		2	2		104942	Serine/threonine-protein phosphatase 6 regulatory subunit 2 OS=Homo sapiens OX=9606 GN=PPP6R2 PE=1 SV=2
2080	TRUE	Q7L591|DOK3_HUMAN	146.639	5	5	4	8	2	13	13	1	1	1	1	1			11	10	0.909091	4	8	2	Carbamidomethylation	53288.3	Docking protein 3 OS=Homo sapiens OX=9606 GN=DOK3 PE=1 SV=2
2638	TRUE	Q8IZ81|ELMD2_HUMAN	108.571	4	4		2	2		5	5	1	3	3		3	3				1	2	2		34960.6	ELMO domain-containing protein 2 OS=Homo sapiens OX=9606 GN=ELMOD2 PE=1 SV=1
2691	FALSE	O14966|RAB7L_HUMAN	67.8578	1	1							2	3	1.5	2	1	0.5	3	5	1.66667	2	7	3.5		23155.2	Ras-related protein Rab-7L1 OS=Homo sapiens OX=9606 GN=RAB29 PE=1 SV=1
2691	FALSE	P57729|RAB38_HUMAN	67.8578	1	1							2	3	1.5	2	1	0.5	3	5	1.66667	2	7	3.5		23712.4	Ras-related protein Rab-38 OS=Homo sapiens OX=9606 GN=RAB38 PE=1 SV=1
2582	TRUE	Q9BUL8|PDC10_HUMAN	111.621	4	4	2	4	2		3	3				2	3	1.5	2				2	2		24701.6	Programmed cell death protein 10 OS=Homo sapiens OX=9606 GN=PDCD10 PE=1 SV=1
978	FALSE	O95154|ARK73_HUMAN	62.2238	1	1	1	2	2		1	1		5	5		1	1	5	7	1.4	2	7	3.5	Carbamidomethylation	37206.4	Aflatoxin B1 aldehyde reductase member 3 OS=Homo sapiens OX=9606 GN=AKR7A3 PE=1 SV=2
1488	TRUE	P09914|IFIT1_HUMAN	190.578	7	7		2	2	4	5	1.25		2	2	24	20	0.833333	1	3	3	6	11	1.83333	Oxidation (M); Carbamidomethylation	55360.3	Interferon-induced protein with tetratricopeptide repeats 1 OS=Homo sapiens OX=9606 GN=IFIT1 PE=1 SV=2
2693	TRUE	Q13505|MTX1_HUMAN	104.1	2	2		2	2		2	2							5	8	1.6	5	9	1.8		51462.8	Metaxin-1 OS=Homo sapiens OX=9606 GN=MTX1 PE=1 SV=3
807	TRUE	Q8N1N4|K2C78_HUMAN	252.143	17	11	3	6	2	51	1	0.0196078		7	7	3			23	19	0.826087	23	41	1.78261		56865.8	Keratin, type II cytoskeletal 78 OS=Homo sapiens OX=9606 GN=KRT78 PE=1 SV=2
1614	TRUE	P35637|FUS_HUMAN	179.894	5	4	18	36	2	24	43	1.79167	5	8	1.6	2	26	13	18	45	2.5	16	28	1.75	Carbamidomethylation; Oxidation (M)	53425.8	RNA-binding protein FUS OS=Homo sapiens OX=9606 GN=FUS PE=1 SV=1
1821	TRUE	Q13546|RIPK1_HUMAN	164.039	5	5	3	6	2	5	15	3							7	9	1.28571	4	7	1.75		75930.8	Receptor-interacting serine/threonine-protein kinase 1 OS=Homo sapiens OX=9606 GN=RIPK1 PE=1 SV=3
2142	TRUE	O15126|SCAM1_HUMAN	143.066	4	4	8	16	2	7	20	2.85714	17	16	0.941176	2	16	8	11	21	1.90909	7	12	1.71429		37920.4	Secretory carrier-associated membrane protein 1 OS=Homo sapiens OX=9606 GN=SCAMP1 PE=1 SV=2
1777	TRUE	P05089|ARGI1_HUMAN	166.361	7	7		2	2	23									4	2	0.5	3	5	1.66667	Oxidation (M)	34734.9	Arginase-1 OS=Homo sapiens OX=9606 GN=ARG1 PE=1 SV=2
2273	TRUE	Q969F9|HPS3_HUMAN	134.18	6	6	1	2	2	5	12	2.4							3	7	2.33333	2	3	1.5		113736	Hermansky-Pudlak syndrome 3 protein OS=Homo sapiens OX=9606 GN=HPS3 PE=1 SV=1
3042	TRUE	Q9HAD4|WDR41_HUMAN	82.2954	3	3		2	2										2	2	1	2	3	1.5	Carbamidomethylation	51728	WD repeat-containing protein 41 OS=Homo sapiens OX=9606 GN=WDR41 PE=1 SV=3
2893	TRUE	Q7Z3B4|NUP54_HUMAN	92.1731	2	2		2	2	1	3	3							5	4	0.8	4	6	1.5		55435.5	Nucleoporin p54 OS=Homo sapiens OX=9606 GN=NUP54 PE=1 SV=2
1590	TRUE	Q96JB5|CK5P3_HUMAN	182.153	7	7	2	4	2	7	22	3.14286	3	5	1.66667	2	13	6.5	7	14	2	9	13	1.44444		56920.7	CDK5 regulatory subunit-associated protein 3 OS=Homo sapiens OX=9606 GN=CDK5RAP3 PE=1 SV=2
2578	TRUE	Q8NBJ7|SUMF2_HUMAN	111.784	3	3		2	2				2				4	4	1	14	14	5	6	1.2		33843.1	Inactive C-alpha-formylglycine-generating enzyme 2 OS=Homo sapiens OX=9606 GN=SUMF2 PE=1 SV=2
1280	TRUE	Q5D862|FILA2_HUMAN	206.948	6	6	9	18	2	77			1			9	1	0.111111	10	6	0.6	16	18	1.125	Oxidation (M)	248073	Filaggrin-2 OS=Homo sapiens OX=9606 GN=FLG2 PE=1 SV=1
2332	TRUE	Q04837|SSBP_HUMAN	128.912	2	2		2	2	9	4	0.444444	8	1	0.125				6	14	2.33333	11	12	1.09091		17259.7	Single-stranded DNA-binding protein, mitochondrial OS=Homo sapiens OX=9606 GN=SSBP1 PE=1 SV=1
1816	TRUE	P24385|CCND1_HUMAN	164.279	5	4		2	2		1	1		9	9		12	12		7	7		1	1	Carbamidomethylation	33729.1	G1/S-specific cyclin-D1 OS=Homo sapiens OX=9606 GN=CCND1 PE=1 SV=1
176	FALSE	Q9UKU0|ACSL6_HUMAN	76.7738	1	1	2	2	1	3	5	1.66667	1			1	6	6	3	5	1.66667	3	10	3.33333		77751.9	Long-chain-fatty-acid--CoA ligase 6 OS=Homo sapiens OX=9606 GN=ACSL6 PE=1 SV=4
3090	TRUE	Q8WUK0|PTPM1_HUMAN	79.8417	1	1				3	2	0.666667							3	5	1.66667	3	10	3.33333		22843.6	Phosphatidylglycerophosphatase and protein-tyrosine phosphatase 1 OS=Homo sapiens OX=9606 GN=PTPMT1 PE=1 SV=1
3177	TRUE	O15382|BCAT2_HUMAN	74.1447	2	2		2	2	3	4	1.33333	1			1			1	4	4		1	1	Carbamidomethylation	44287.7	Branched-chain-amino-acid aminotransferase, mitochondrial OS=Homo sapiens OX=9606 GN=BCAT2 PE=1 SV=2
1306	FALSE	Q6PFW1|VIP1_HUMAN	89.0688	2	2		2	2	1										4	4		1	1		159521	Inositol hexakisphosphate and diphosphoinositol-pentakisphosphate kinase 1 OS=Homo sapiens OX=9606 GN=PPIP5K1 PE=1 SV=1
2254	TRUE	Q567U6|CCD93_HUMAN	135.206	7	7	1	2	2		8	8	1	1	1		2	2	1	3	3	4	4	1	Carbamidomethylation	73197.6	Coiled-coil domain-containing protein 93 OS=Homo sapiens OX=9606 GN=CCDC93 PE=1 SV=2
2720	TRUE	Q13526|PIN1_HUMAN	102.341	2	2		2	2		4	4		1	1					3	3	2	2	1	Carbamidomethylation	18243.3	Peptidyl-prolyl cis-trans isomerase NIMA-interacting 1 OS=Homo sapiens OX=9606 GN=PIN1 PE=1 SV=1
1730	TRUE	Q8NDA8|MROH1_HUMAN	170.099	11	11	9	18	2	12	34	2.83333							1	3	3	1	1	1	Carbamidomethylation	181249	Maestro heat-like repeat-containing protein family member 1 OS=Homo sapiens OX=9606 GN=MROH1 PE=2 SV=3
2982	TRUE	P54922|ADPRH_HUMAN	86.1148	2	2		2	2					4	4		6	6	4	5	1.25	3	3	1		39506.6	[Protein ADP-ribosylarginine] hydrolase OS=Homo sapiens OX=9606 GN=ADPRH PE=1 SV=1
3297	TRUE	P06400|RB_HUMAN	66.6601	2	2		2	2		4	4								1	1		1	1	Carbamidomethylation	106159	Retinoblastoma-associated protein OS=Homo sapiens OX=9606 GN=RB1 PE=1 SV=2
2745	TRUE	P28845|DHI1_HUMAN	100.988	2	2		2	2	9	9	1				1	12	12	5	4	0.8	4	4	1	Carbamidomethylation	32400.9	Corticosteroid 11-beta-dehydrogenase isozyme 1 OS=Homo sapiens OX=9606 GN=HSD11B1 PE=1 SV=3
2596	TRUE	Q5R372|RBG1L_HUMAN	110.779	3	3		2	2		1	1							2	1	0.5		1	1		92512.9	Rab GTPase-activating protein 1-like OS=Homo sapiens OX=9606 GN=RABGAP1L PE=1 SV=1
2473	TRUE	Q9UNS2|CSN3_HUMAN	118.272	5	5		2	2	3	5	1.66667	1						3	1	0.333333	1	1	1		47873.1	COP9 signalosome complex subunit 3 OS=Homo sapiens OX=9606 GN=COPS3 PE=1 SV=3
3125	TRUE	P49790|NU153_HUMAN	77.8483	2	2		2	2	2	3	1.5					2	2				2	2	1	Carbamidomethylation	153938	Nuclear pore complex protein Nup153 OS=Homo sapiens OX=9606 GN=NUP153 PE=1 SV=2
1170	FALSE	P05129|KPCG_HUMAN	112.229	2	1	3	2	0.666667	1	1	1							1	12	12	5	16	3.2	Carbamidomethylation	78447.8	Protein kinase C gamma type OS=Homo sapiens OX=9606 GN=PRKCG PE=1 SV=3
1485	TRUE	Q13315|ATM_HUMAN	191.192	10	10	3	6	2	1	28	28					1	1				1	1	1	Carbamidomethylation	350687	Serine-protein kinase ATM OS=Homo sapiens OX=9606 GN=ATM PE=1 SV=4
3238	TRUE	Q9BZW5|TM6S1_HUMAN	69.2333	2	2	1	2	2	2	7	3.5							1				1	1		41636.1	Transmembrane 6 superfamily member 1 OS=Homo sapiens OX=9606 GN=TM6SF1 PE=1 SV=2
2468	FALSE	P02787|TRFE_HUMAN	101.792	4	4	1	2	2	9	6	0.666667							3			6	6	1	Carbamidomethylation	77063.9	Serotransferrin OS=Homo sapiens OX=9606 GN=TF PE=1 SV=3
3153	TRUE	Q9HCS7|SYF1_HUMAN	75.8942	2	2		2	2														1	1		100010	Pre-mRNA-splicing factor SYF1 OS=Homo sapiens OX=9606 GN=XAB2 PE=1 SV=2
3245	TRUE	Q9ULH0|KDIS_HUMAN	69.0018	3	3		2	2														1	1	Carbamidomethylation	196542	Kinase D-interacting substrate of 220 kDa OS=Homo sapiens OX=9606 GN=KIDINS220 PE=1 SV=3
946	TRUE	P20592|MX2_HUMAN	238.326	9	6	1	2	2	39	57	1.46154	13	3	0.230769	33	38	1.15152	15	14	0.933333	33	30	0.909091	Carbamidomethylation	82088.7	Interferon-induced GTP-binding protein Mx2 OS=Homo sapiens OX=9606 GN=MX2 PE=1 SV=1
1000	TRUE	O43175|SERA_HUMAN	232.595	10	10	3	6	2	33	54	1.63636	1			7	22	3.14286	4	3	0.75	23	20	0.869565	Carbamidomethylation	56650.5	D-3-phosphoglycerate dehydrogenase OS=Homo sapiens OX=9606 GN=PHGDH PE=1 SV=4
1913	TRUE	O75489|NDUS3_HUMAN	158.238	4	4	5	10	2	7	5	0.714286		2	2	3	4	1.33333	12	11	0.916667	13	11	0.846154		30241.5	NADH dehydrogenase [ubiquinone] iron-sulfur protein 3, mitochondrial OS=Homo sapiens OX=9606 GN=NDUFS3 PE=1 SV=1
2267	TRUE	Q96PC5|MIA2_HUMAN	134.47	4	4	1	2	2	1	5	5							4	6	1.5	8	6	0.75	Carbamidomethylation	159836	Melanoma inhibitory activity protein 2 OS=Homo sapiens OX=9606 GN=MIA2 PE=1 SV=4
2276	TRUE	Q8N5K1|CISD2_HUMAN	133.987	3	3	3	6	2	10	8	0.8		3	3	1	2	2	3	3	1	7	5	0.714286	Carbamidomethylation	15278.2	CDGSH iron-sulfur domain-containing protein 2 OS=Homo sapiens OX=9606 GN=CISD2 PE=1 SV=1
1621	TRUE	O60264|SMCA5_HUMAN	179.209	9	9	5	10	2	17	23	1.35294		2	2	1	6	6	2	7	3.5	12	8	0.666667		121905	SWI/SNF-related matrix-associated actin-dependent regulator of chromatin subfamily A member 5 OS=Homo sapiens OX=9606 GN=SMARCA5 PE=1 SV=1
3036	TRUE	P17152|TMM11_HUMAN	82.7363	2	2		2	2	3									1	2	2	3	2	0.666667		21540.8	Transmembrane protein 11, mitochondrial OS=Homo sapiens OX=9606 GN=TMEM11 PE=1 SV=1
1504	TRUE	O00170|AIP_HUMAN	189.852	7	7	10	20	2	10	22	2.2	17	17	1	8	19	2.375		8	8	8	5	0.625	Carbamidomethylation; Oxidation (M)	37636	AH receptor-interacting protein OS=Homo sapiens OX=9606 GN=AIP PE=1 SV=2
2398	TRUE	Q53H82|LACB2_HUMAN	123.073	3	3	1	2	2		3	3	3				2	2	6	10	1.66667	7	4	0.571429	Carbamidomethylation	32805.6	Endoribonuclease LACTB2 OS=Homo sapiens OX=9606 GN=LACTB2 PE=1 SV=2
2178	TRUE	Q9HCC0|MCCB_HUMAN	140.79	5	5		2	2	4	6	1.5							2	6	3	4	2	0.5	Carbamidomethylation	61333.2	Methylcrotonoyl-CoA carboxylase beta chain, mitochondrial OS=Homo sapiens OX=9606 GN=MCCC2 PE=1 SV=1
2708	TRUE	Q7Z739|YTHD3_HUMAN	102.993	3	2		2	2		3	3								1	1	2	1	0.5		63861.2	YTH domain-containing family protein 3 OS=Homo sapiens OX=9606 GN=YTHDF3 PE=1 SV=1
2035	TRUE	Q9UBW5|BIN2_HUMAN	149.837	4	4	2	4	2	11	12	1.09091	4	2	0.5	8	9	1.125	12	24	2	32	9	0.28125	Carbamidomethylation	61874.4	Bridging integrator 2 OS=Homo sapiens OX=9606 GN=BIN2 PE=1 SV=3
2939	TRUE	P16333|NCK1_HUMAN	89.2334	2	2		2	2		3	3	2	1	0.5	3	2	0.666667	1	5	5	1				42864.5	Cytoplasmic protein NCK1 OS=Homo sapiens OX=9606 GN=NCK1 PE=1 SV=1
2764	TRUE	P04183|KITH_HUMAN	100.286	3	3		2	2		1	1								4	4				Carbamidomethylation	25468.7	Thymidine kinase, cytosolic OS=Homo sapiens OX=9606 GN=TK1 PE=1 SV=2
2397	TRUE	P48553|TPC10_HUMAN	123.083	6	6		2	2	3	1	0.333333							1	4	4	1				142189	Trafficking protein particle complex subunit 10 OS=Homo sapiens OX=9606 GN=TRAPPC10 PE=1 SV=2
617	FALSE	Q9NQ94|A1CF_HUMAN	77.6107	1	1		1	1	3	4	1.33333		2	2	1	3	3	1	7	7		3	3		65202.5	APOBEC1 complementation factor OS=Homo sapiens OX=9606 GN=A1CF PE=1 SV=1
617	FALSE	Q8TBY0|RBM46_HUMAN	77.6107	1	1		1	1	3	4	1.33333		2	2	1	3	3	1	7	7		3	3		60022.5	Probable RNA-binding protein 46 OS=Homo sapiens OX=9606 GN=RBM46 PE=1 SV=1
1914	TRUE	Q6PIY7|GLD2_HUMAN	158.215	5	5		2	2		21	21					13	13		3	3				Carbamidomethylation	56027.7	Poly(A) RNA polymerase GLD2 OS=Homo sapiens OX=9606 GN=TENT2 PE=1 SV=1
967	FALSE	Q9Y625|GPC6_HUMAN	73.3747	1	1					6	6		9	9		4	4		6	6		3	3		62735.5	Glypican-6 OS=Homo sapiens OX=9606 GN=GPC6 PE=1 SV=1
2212	TRUE	Q9HC98|NEK6_HUMAN	138.392	3	2	5	10	2	10	10	1	2	7	3.5		19	19		2	2				Carbamidomethylation	35714.3	Serine/threonine-protein kinase Nek6 OS=Homo sapiens OX=9606 GN=NEK6 PE=1 SV=2
2564	TRUE	Q9P0V9|SEP10_HUMAN	112.597	4	4	1	2	2	7	8	1.14286					5	5	1	2	2					52593	Septin-10 OS=Homo sapiens OX=9606 GN=SEPTIN10 PE=1 SV=2
2176	TRUE	Q12913|PTPRJ_HUMAN	141.008	5	5	1	2	2	23	19	0.826087	1			3	1	0.333333	1	2	2					145941	Receptor-type tyrosine-protein phosphatase eta OS=Homo sapiens OX=9606 GN=PTPRJ PE=1 SV=3
3064	TRUE	Q9NP61|ARFG3_HUMAN	81.2473	4	4	1	2	2	2	4	2								2	2				Carbamidomethylation	56928.4	ADP-ribosylation factor GTPase-activating protein 3 OS=Homo sapiens OX=9606 GN=ARFGAP3 PE=1 SV=1
2127	TRUE	P61201|CSN2_HUMAN	144.024	8	8	2	4	2	2	8	4	2				4	4	7	10	1.42857	1			Carbamidomethylation	51596.7	COP9 signalosome complex subunit 2 OS=Homo sapiens OX=9606 GN=COPS2 PE=1 SV=1
2515	FALSE	Q9UPQ3|AGAP1_HUMAN	74.3304	1	1	6	3	0.5	6	8	1.33333	3	1	0.333333	4	1	0.25	1	4	4	1	3	3		94470.1	Arf-GAP with GTPase, ANK repeat and PH domain-containing protein 1 OS=Homo sapiens OX=9606 GN=AGAP1 PE=1 SV=4
3419	TRUE	Q12789|TF3C1_HUMAN	60.2693	2	2		2	2		4	4								1	1				Carbamidomethylation	238875	General transcription factor 3C polypeptide 1 OS=Homo sapiens OX=9606 GN=GTF3C1 PE=1 SV=4
3171	TRUE	Q96JY6|PDLI2_HUMAN	74.543	2	2	1	2	2	3	4	1.33333							1	1	1	2				37458.9	PDZ and LIM domain protein 2 OS=Homo sapiens OX=9606 GN=PDLIM2 PE=1 SV=1
3135	TRUE	Q15796|SMAD2_HUMAN	77.348	2	2	1	2	2										1	1	1				Carbamidomethylation	52306.1	Mothers against decapentaplegic homolog 2 OS=Homo sapiens OX=9606 GN=SMAD2 PE=1 SV=1
3135	TRUE	O15198|SMAD9_HUMAN	77.348	2	2	1	2	2										1	1	1				Carbamidomethylation	52493.4	Mothers against decapentaplegic homolog 9 OS=Homo sapiens OX=9606 GN=SMAD9 PE=1 SV=1
3135	TRUE	P84022|SMAD3_HUMAN	77.348	2	2	1	2	2										1	1	1				Carbamidomethylation	48080.8	Mothers against decapentaplegic homolog 3 OS=Homo sapiens OX=9606 GN=SMAD3 PE=1 SV=1
2777	TRUE	Q13393|PLD1_HUMAN	99.2411	4	4	1	2	2		2	2							3	1	0.333333					124184	Phospholipase D1 OS=Homo sapiens OX=9606 GN=PLD1 PE=1 SV=1
932	FALSE	Q86XE0|SNX32_HUMAN	103.209	2	2	4	8	2	6	10	1.66667							3	1	0.333333	1				46398.9	Sorting nexin-32 OS=Homo sapiens OX=9606 GN=SNX32 PE=1 SV=1
2329	TRUE	Q9NQZ5|STAR7_HUMAN	129.289	3	3		2	2		15	15					13	13								43113.2	StAR-related lipid transfer protein 7, mitochondrial OS=Homo sapiens OX=9606 GN=STARD7 PE=1 SV=2
3109	TRUE	P09417|DHPR_HUMAN	78.7319	2	2	1	2	2	1			6				3	3	1						Oxidation (M)	25789.5	Dihydropteridine reductase OS=Homo sapiens OX=9606 GN=QDPR PE=1 SV=2
2660	TRUE	P55058|PLTP_HUMAN	107.158	3	3		2	2		11	11		4	4		1	1								54739.4	Phospholipid transfer protein OS=Homo sapiens OX=9606 GN=PLTP PE=1 SV=1
3000	TRUE	Q9UPU7|TBD2B_HUMAN	85.0689	3	3		2	2	2	2	1					1	1								109880	TBC1 domain family member 2B OS=Homo sapiens OX=9606 GN=TBC1D2B PE=1 SV=2
2434	FALSE	Q9BY15|AGRE3_HUMAN	68.0552	1	1		1	1		6	6					12	12		2	2		3	3		72621.1	Adhesion G protein-coupled receptor E3 OS=Homo sapiens OX=9606 GN=ADGRE3 PE=2 SV=2
2409	FALSE	Q6UWV6|ENPP7_HUMAN	54.6136	1	1		4	4		4	4		5	5		10	10		2	2		3	3		51493.8	Ectonucleotide pyrophosphatase/phosphodiesterase family member 7 OS=Homo sapiens OX=9606 GN=ENPP7 PE=1 SV=3
3194	TRUE	Q13573|SNW1_HUMAN	72.3094	2	2	1	2	2		2	2				3	2	0.666667								61494.4	SNW domain-containing protein 1 OS=Homo sapiens OX=9606 GN=SNW1 PE=1 SV=1
2886	TRUE	Q92508|PIEZ1_HUMAN	92.631	4	4		2	2		4	4														286790	Piezo-type mechanosensitive ion channel component 1 OS=Homo sapiens OX=9606 GN=PIEZO1 PE=1 SV=4
3187	TRUE	Q92609|TBCD5_HUMAN	73.267	2	2		2	2	1	4	4														89004.4	TBC1 domain family member 5 OS=Homo sapiens OX=9606 GN=TBC1D5 PE=1 SV=1
711	FALSE	Q9UBC5|MYO1A_HUMAN	72.4834	1	1	5	5	1	7	7	1					1	1	3	6	2	3	9	3		118401	Unconventional myosin-Ia OS=Homo sapiens OX=9606 GN=MYO1A PE=1 SV=1
3024	TRUE	Q9ULQ1|TPC1_HUMAN	83.6772	2	2		2	2		3	3														94146.8	Two pore calcium channel protein 1 OS=Homo sapiens OX=9606 GN=TPCN1 PE=1 SV=3
3020	TRUE	P37840|SYUA_HUMAN	83.8137	2	2		2	2		2	2														14460.2	Alpha-synuclein OS=Homo sapiens OX=9606 GN=SNCA PE=1 SV=1
3184	TRUE	O00541|PESC_HUMAN	73.5046	2	2	1	2	2	1	1	1													Carbamidomethylation	68002.6	Pescadillo homolog OS=Homo sapiens OX=9606 GN=PES1 PE=1 SV=1
297	TRUE	P38571|LICH_HUMAN	325.608	25	25	67	132	1.97015	41	180	4.39024	21	99	4.71429	8	182	22.75	75	218	2.90667	60	289	4.81667	Carbamidomethylation; Oxidation (M)	45419	Lysosomal acid lipase/cholesteryl ester hydrolase OS=Homo sapiens OX=9606 GN=LIPA PE=1 SV=2
5	TRUE	P04264|K2C1_HUMAN	575.092	144	122	438	859	1.96119	1701	242	0.142269	271	202	0.745387	348	108	0.310345	713	512	0.718093	820	1348	1.6439	Oxidation (M); Carbamidomethylation	66038.7	Keratin, type II cytoskeletal 1 OS=Homo sapiens OX=9606 GN=KRT1 PE=1 SV=6
486	TRUE	P02649|APOE_HUMAN	293.148	12	12	39	76	1.94872	31	90	2.90323	20	106	5.3	27	99	3.66667	38	55	1.44737	45	86	1.91111	Oxidation (M); Carbamidomethylation	36154.1	Apolipoprotein E OS=Homo sapiens OX=9606 GN=APOE PE=1 SV=1
3628	TRUE	O14807|RASM_HUMAN	49.7822	1	1		2	2		1	1							2	4	2	1	3	3		23846.4	Ras-related protein M-Ras OS=Homo sapiens OX=9606 GN=MRAS PE=1 SV=2
1552	TRUE	Q15717|ELAV1_HUMAN	185.604	5	5	14	27	1.92857	12	27	2.25	12	10	0.833333	15	8	0.533333	15	11	0.733333	12	13	1.08333		36091.9	ELAV-like protein 1 OS=Homo sapiens OX=9606 GN=ELAVL1 PE=1 SV=2
3295	TRUE	Q9UJJ9|GNPTG_HUMAN	66.7051	1	1														2	2		3	3		33973.6	N-acetylglucosamine-1-phosphotransferase subunit gamma OS=Homo sapiens OX=9606 GN=GNPTG PE=1 SV=1
3192	TRUE	P28290|ITPI2_HUMAN	72.3295	1	1													2	4	2	1	3	3		138386	Protein ITPRID2 OS=Homo sapiens OX=9606 GN=ITPRID2 PE=1 SV=3
3634	TRUE	O00264|PGRC1_HUMAN	49.5553	1	1														2	2	2	6	3		21671.2	Membrane-associated progesterone receptor component 1 OS=Homo sapiens OX=9606 GN=PGRMC1 PE=1 SV=3
1135	TRUE	Q9BXB4|OSB11_HUMAN	220.62	11	11	13	25	1.92308	18	27	1.5	2						38	39	1.02632	16	26	1.625	Carbamidomethylation	83643.2	Oxysterol-binding protein-related protein 11 OS=Homo sapiens OX=9606 GN=OSBPL11 PE=1 SV=2
1755	TRUE	O43861|ATP9B_HUMAN	168.066	4	4	12	23	1.91667	19	27	1.42105	6	6	1		4	4	4	4	1	4	18	4.5		129304	Probable phospholipid-transporting ATPase IIB OS=Homo sapiens OX=9606 GN=ATP9B PE=2 SV=4
1899	TRUE	O43670|ZN207_HUMAN	159.274	4	4	12	23	1.91667	12	27	2.25		8	8		5	5		13	13	3	10	3.33333		50750.5	BUB3-interacting and GLEBS motif-containing protein ZNF207 OS=Homo sapiens OX=9606 GN=ZNF207 PE=1 SV=1
755	FALSE	Q9GZV4|IF5A2_HUMAN	165.136	3	3	10	19	1.9	11	13	1.18182	19	11	0.578947	4	17	4.25	2	1	0.5	6	8	1.33333	Carbamidomethylation; Oxidation (M)	16793.2	Eukaryotic translation initiation factor 5A-2 OS=Homo sapiens OX=9606 GN=EIF5A2 PE=1 SV=3
794	TRUE	Q86TU7|SETD3_HUMAN	253.31	14	14	29	55	1.89655	30	45	1.5	14	11	0.785714	14	12	0.857143	19	42	2.21053	15	30	2		67257.1	Actin-histidine N-methyltransferase OS=Homo sapiens OX=9606 GN=SETD3 PE=1 SV=1
1110	TRUE	Q9Y485|DMXL1_HUMAN	222.268	12	12	19	36	1.89474	6	30	5					2	2	15	19	1.26667	2	7	3.5	Carbamidomethylation	337839	DmX-like protein 1 OS=Homo sapiens OX=9606 GN=DMXL1 PE=1 SV=3
879	TRUE	Q9HB40|RISC_HUMAN	244.906	15	15	19	36	1.89474	39	64	1.64103	15	18	1.2	54	93	1.72222	19	24	1.26316	24	68	2.83333	Oxidation (M); Carbamidomethylation	50830.7	Retinoid-inducible serine carboxypeptidase OS=Homo sapiens OX=9606 GN=SCPEP1 PE=1 SV=1
1510	TRUE	Q13586|STIM1_HUMAN	189.057	9	9	9	17	1.88889	12	20	1.66667	4	4	1		10	10	8	15	1.875	7	17	2.42857	Carbamidomethylation	77423.4	Stromal interaction molecule 1 OS=Homo sapiens OX=9606 GN=STIM1 PE=1 SV=3
2392	TRUE	Q9NYF8|BCLF1_HUMAN	123.467	3	3	9	17	1.88889	9	10	1.11111	1				1	1	2	4	2	7	9	1.28571		106122	Bcl-2-associated transcription factor 1 OS=Homo sapiens OX=9606 GN=BCLAF1 PE=1 SV=2
425	FALSE	A2RTX5|SYTC2_HUMAN	155.888	3	3	9	17	1.88889	13	15	1.15385	2	1	0.5	1	9	9	12	10	0.833333	17	11	0.647059	Carbamidomethylation	92645.6	Threonine--tRNA ligase 2, cytoplasmic OS=Homo sapiens OX=9606 GN=TARS3 PE=1 SV=1
866	TRUE	Q9UPU5|UBP24_HUMAN	246.833	15	15	16	30	1.875	23	31	1.34783							10	15	1.5	8	12	1.5	Carbamidomethylation	294365	Ubiquitin carboxyl-terminal hydrolase 24 OS=Homo sapiens OX=9606 GN=USP24 PE=1 SV=3
1012	TRUE	P42285|MTREX_HUMAN	231.644	11	11	8	15	1.875	6	35	5.83333		1	1		1	1	7	17	2.42857	12	17	1.41667	Carbamidomethylation	117805	Exosome RNA helicase MTR4 OS=Homo sapiens OX=9606 GN=MTREX PE=1 SV=3
1169	TRUE	Q96JI7|SPTCS_HUMAN	216.953	14	14	15	28	1.86667	30	47	1.56667					1	1	13	13	1	1	14	14	Carbamidomethylation	278868	Spatacsin OS=Homo sapiens OX=9606 GN=SPG11 PE=1 SV=3
940	TRUE	P07099|HYEP_HUMAN	238.875	10	10	7	13	1.85714	11	29	2.63636	1	2	2				11	5	0.454545	1	22	22	Carbamidomethylation	52948.9	Epoxide hydrolase 1 OS=Homo sapiens OX=9606 GN=EPHX1 PE=1 SV=1
3351	TRUE	O00499|BIN1_HUMAN	64.0023	1	1		1	1										3	4	1.33333	1	3	3		64699.4	Myc box-dependent-interacting protein 1 OS=Homo sapiens OX=9606 GN=BIN1 PE=1 SV=1
1365	TRUE	Q99459|CDC5L_HUMAN	201.067	9	9	14	26	1.85714	13	17	1.30769		1	1	2	2	1	16	19	1.1875	18	21	1.16667		92250.6	Cell division cycle 5-like protein OS=Homo sapiens OX=9606 GN=CDC5L PE=1 SV=2
358	TRUE	P33527|MRP1_HUMAN	312.782	29	28	40	74	1.85	49	89	1.81633	5	2	0.4	2	3	1.5	35	42	1.2	30	52	1.73333	Carbamidomethylation	171591	Multidrug resistance-associated protein 1 OS=Homo sapiens OX=9606 GN=ABCC1 PE=1 SV=3
1232	TRUE	P13747|HLAE_HUMAN	210.961	6	3	13	24	1.84615	24	36	1.5	9	13	1.44444	6	57	9.5	8	12	1.5	13	12	0.923077		40057.6	HLA class I histocompatibility antigen, alpha chain E OS=Homo sapiens OX=9606 GN=HLA-E PE=1 SV=4
525	TRUE	Q9UBV2|SE1L1_HUMAN	287.449	15	15	19	35	1.84211	12	75	6.25	2	7	3.5		16	16	18	41	2.27778	14	63	4.5	Carbamidomethylation	88754.7	Protein sel-1 homolog 1 OS=Homo sapiens OX=9606 GN=SEL1L PE=1 SV=3
2282	TRUE	Q9Y6A9|SPCS1_HUMAN	133.389	2	2	6	11	1.83333	10	10	1	1	4	4	1	3	3	1	7	7	1	10	10		18298.2	Signal peptidase complex subunit 1 OS=Homo sapiens OX=9606 GN=SPCS1 PE=1 SV=5
2012	TRUE	P17812|PYRG1_HUMAN	150.7	5	5	6	11	1.83333		9	9		2	2				7	11	1.57143	1	4	4		66690.4	CTP synthase 1 OS=Homo sapiens OX=9606 GN=CTPS1 PE=1 SV=2
1450	TRUE	Q8WUM0|NU133_HUMAN	193.914	9	9	6	11	1.83333	7	30	4.28571							13	12	0.923077	3	9	3		128979	Nuclear pore complex protein Nup133 OS=Homo sapiens OX=9606 GN=NUP133 PE=1 SV=2
812	FALSE	O75635|SPB7_HUMAN	64.1962	1	1	6	5	0.833333	4	5	1.25	3	6	2	2	3	1.5	1	1	1	1	3	3		42904.8	Serpin B7 OS=Homo sapiens OX=9606 GN=SERPINB7 PE=1 SV=1
3845	TRUE	P50750|CDK9_HUMAN	39.2616	1	1											1	1		1	1		3	3		42777.5	Cyclin-dependent kinase 9 OS=Homo sapiens OX=9606 GN=CDK9 PE=1 SV=3
1863	TRUE	Q9BQE5|APOL2_HUMAN	161.172	7	7	6	11	1.83333	10	21	2.1				5	7	1.4	8	15	1.875	8	11	1.375		37092.3	Apolipoprotein L2 OS=Homo sapiens OX=9606 GN=APOL2 PE=1 SV=1
1248	TRUE	O15294|OGT1_HUMAN	209.252	13	13	17	31	1.82353	11	22	2	1			1	5	5	12	13	1.08333		22	22	Carbamidomethylation	116925	UDP-N-acetylglucosamine--peptide N-acetylglucosaminyltransferase 110 kDa subunit OS=Homo sapiens OX=9606 GN=OGT PE=1 SV=3
1527	TRUE	O75746|CMC1_HUMAN	187.709	8	4	11	20	1.81818	20	18	0.9	10	6	0.6	2	8	4	20	16	0.8	14	12	0.857143	Carbamidomethylation	74761.9	Calcium-binding mitochondrial carrier protein Aralar1 OS=Homo sapiens OX=9606 GN=SLC25A12 PE=1 SV=2
279	TRUE	Q8TDJ6|DMXL2_HUMAN	329.416	35	35	37	67	1.81081	48	146	3.04167	1	5	5	2	20	10	32	63	1.96875	24	72	3	Carbamidomethylation	339642	DmX-like protein 2 OS=Homo sapiens OX=9606 GN=DMXL2 PE=1 SV=2
1458	TRUE	Q9HCE1|MOV10_HUMAN	193.537	11	11	5	9	1.8	5	20	4				1	2	2	12	16	1.33333	5	24	4.8	Carbamidomethylation	113671	Helicase MOV-10 OS=Homo sapiens OX=9606 GN=MOV10 PE=1 SV=2
626	TRUE	P20701|ITAL_HUMAN	273.388	15	15	10	18	1.8	20	61	3.05				7	40	5.71429	7	28	4	10	38	3.8	Carbamidomethylation	128770	Integrin alpha-L OS=Homo sapiens OX=9606 GN=ITGAL PE=1 SV=3
705	TRUE	Q7L5N7|PCAT2_HUMAN	261.999	12	12	15	27	1.8	35	60	1.71429	24	48	2	27	46	1.7037	30	41	1.36667	24	68	2.83333	Carbamidomethylation	60207.9	Lysophosphatidylcholine acyltransferase 2 OS=Homo sapiens OX=9606 GN=LPCAT2 PE=1 SV=1
1832	TRUE	Q9Y303|NAGA_HUMAN	163.439	6	6	5	9	1.8	5	7	1.4	1						5	12	2.4	9	10	1.11111		43747.9	N-acetylglucosamine-6-phosphate deacetylase OS=Homo sapiens OX=9606 GN=AMDHD2 PE=1 SV=2
2483	TRUE	O95819|M4K4_HUMAN	117.405	3	3	5	9	1.8		7	7							1	1	1		1	1		142101	Mitogen-activated protein kinase kinase kinase kinase 4 OS=Homo sapiens OX=9606 GN=MAP4K4 PE=1 SV=2
3282	TRUE	Q15326|ZMY11_HUMAN	67.2817	1	1														1	1		3	3		70962.9	Zinc finger MYND domain-containing protein 11 OS=Homo sapiens OX=9606 GN=ZMYND11 PE=1 SV=2
2444	TRUE	Q6P587|FAHD1_HUMAN	120.664	3	3	5	9	1.8	4	5	1.25	3				4	4	6	10	1.66667	10	6	0.6	Carbamidomethylation	24842.9	Acylpyruvase FAHD1, mitochondrial OS=Homo sapiens OX=9606 GN=FAHD1 PE=1 SV=2
1235	TRUE	Q13574|DGKZ_HUMAN	210.459	8	8	15	27	1.8	18	20	1.11111	1	1	1				13	9	0.692308	1			Carbamidomethylation	103981	Diacylglycerol kinase zeta OS=Homo sapiens OX=9606 GN=DGKZ PE=1 SV=4
1983	TRUE	P40818|UBP8_HUMAN	153.065	6	6	5	9	1.8	7	11	1.57143										1				127523	Ubiquitin carboxyl-terminal hydrolase 8 OS=Homo sapiens OX=9606 GN=USP8 PE=1 SV=1
800	TRUE	P06280|AGAL_HUMAN	252.46	11	11	27	48	1.77778	24	40	1.66667	10	41	4.1		60	60	22	53	2.40909	19	50	2.63158	Carbamidomethylation; Oxidation (M)	48766.8	Alpha-galactosidase A OS=Homo sapiens OX=9606 GN=GLA PE=1 SV=1
1361	TRUE	Q9UIA9|XPO7_HUMAN	201.203	13	13	18	32	1.77778	19	25	1.31579							18	14	0.777778	8	8	1	Carbamidomethylation	123907	Exportin-7 OS=Homo sapiens OX=9606 GN=XPO7 PE=1 SV=3
1600	TRUE	P62314|SMD1_HUMAN	181.386	5	5	9	16	1.77778	24	16	0.666667	24			4	8	2				5			Oxidation (M)	13281.6	Small nuclear ribonucleoprotein Sm D1 OS=Homo sapiens OX=9606 GN=SNRPD1 PE=1 SV=1
552	TRUE	Q13617|CUL2_HUMAN	283.131	21	21	42	74	1.7619	36	74	2.05556	17	29	1.70588	6	21	3.5	22	37	1.68182	27	31	1.14815	Oxidation (M); Carbamidomethylation	86983	Cullin-2 OS=Homo sapiens OX=9606 GN=CUL2 PE=1 SV=2
1468	TRUE	Q2TAY7|SMU1_HUMAN	192.649	7	7	8	14	1.75	3	34	11.3333		1	1	1	10	10		17	17		21	21		57543.9	WD40 repeat-containing protein SMU1 OS=Homo sapiens OX=9606 GN=SMU1 PE=1 SV=2
547	TRUE	Q96A65|EXOC4_HUMAN	283.562	17	17	16	28	1.75	2	85	42.5	1	1	1		13	13	21	46	2.19048	5	51	10.2		110498	Exocyst complex component 4 OS=Homo sapiens OX=9606 GN=EXOC4 PE=1 SV=1
1063	TRUE	Q15067|ACOX1_HUMAN	227.274	12	12	8	14	1.75	1	24	24		7	7		5	5	26	42	1.61538	5	19	3.8	Carbamidomethylation	74423.6	Peroxisomal acyl-coenzyme A oxidase 1 OS=Homo sapiens OX=9606 GN=ACOX1 PE=1 SV=3
3259	TRUE	Q9H9J2|RM44_HUMAN	68.3044	1	1	1	1	1		2	2							12	2	0.166667		3	3		37535.4	39S ribosomal protein L44, mitochondrial OS=Homo sapiens OX=9606 GN=MRPL44 PE=1 SV=1
1874	TRUE	P21926|CD9_HUMAN	160.815	4	4	8	14	1.75	6	12	2	4	7	1.75	3	4	1.33333	11	20	1.81818	7	16	2.28571	Carbamidomethylation	25416.1	CD9 antigen OS=Homo sapiens OX=9606 GN=CD9 PE=1 SV=4
2300	TRUE	Q8TED9|AF1L1_HUMAN	131.464	4	4	4	7	1.75	1									3	2	0.666667		2	2	Carbamidomethylation	86431.7	Actin filament-associated protein 1-like 1 OS=Homo sapiens OX=9606 GN=AFAP1L1 PE=1 SV=2
3045	TRUE	Q9GZU1|MCLN1_HUMAN	82.1697	1	1	4			4	14	3.5	11	12	1.09091		7	7	2				3	3	Carbamidomethylation	65022.3	Mucolipin-1 OS=Homo sapiens OX=9606 GN=MCOLN1 PE=1 SV=1
1687	TRUE	O43396|TXNL1_HUMAN	173.606	6	6	8	14	1.75	19	23	1.21053	4			3	10	3.33333	5	10	2	14	16	1.14286		32251.3	Thioredoxin-like protein 1 OS=Homo sapiens OX=9606 GN=TXNL1 PE=1 SV=3
340	TRUE	P01893|HLAH_HUMAN	317.468	15	2	43	75	1.74419	71	147	2.07042	44	46	1.04545	35	181	5.17143	37	59	1.59459	50	92	1.84	Carbamidomethylation; Oxidation (M)	40891.9	Putative HLA class I histocompatibility antigen, alpha chain H OS=Homo sapiens OX=9606 GN=HLA-H PE=5 SV=3
1316	TRUE	Q9UKG1|DP13A_HUMAN	204.157	10	10	15	26	1.73333	11	28	2.54545		8	8	1	19	19	13	22	1.69231	3	10	3.33333	Carbamidomethylation	79663.5	DCC-interacting protein 13-alpha OS=Homo sapiens OX=9606 GN=APPL1 PE=1 SV=1
1100	TRUE	Q02880|TOP2B_HUMAN	223.149	16	16	15	26	1.73333	27	40	1.48148	3				2	2	13	13	1	7	15	2.14286		183267	DNA topoisomerase 2-beta OS=Homo sapiens OX=9606 GN=TOP2B PE=1 SV=3
119	TRUE	P02786|TFR1_HUMAN	380.991	39	39	170	294	1.72941	153	367	2.39869	56	198	3.53571	39	166	4.25641	124	297	2.39516	155	302	1.94839	Oxidation (M); Carbamidomethylation	84871.4	Transferrin receptor protein 1 OS=Homo sapiens OX=9606 GN=TFRC PE=1 SV=2
3173	TRUE	O95562|SFT2B_HUMAN	74.323	1	1					2	2					2	2				1	3	3		17779.4	Vesicle transport protein SFT2B OS=Homo sapiens OX=9606 GN=SFT2D2 PE=1 SV=1
1655	TRUE	Q14444|CAPR1_HUMAN	175.974	7	7	22	38	1.72727	15	22	1.46667	14	16	1.14286	6	9	1.5	14	15	1.07143	13	13	1		78366.2	Caprin-1 OS=Homo sapiens OX=9606 GN=CAPRIN1 PE=1 SV=2
747	TRUE	Q9UHD2|TBK1_HUMAN	257.659	13	13	29	50	1.72414	31	52	1.67742	6	20	3.33333	5	44	8.8	41	64	1.56098	38	53	1.39474	Carbamidomethylation	83642.1	Serine/threonine-protein kinase TBK1 OS=Homo sapiens OX=9606 GN=TBK1 PE=1 SV=1
1204	TRUE	Q9BZD2|S29A3_HUMAN	213.847	9	9	14	24	1.71429	16	38	2.375	5	11	2.2	7	7	1	16	18	1.125	12	23	1.91667	Carbamidomethylation	51814.6	Equilibrative nucleoside transporter 3 OS=Homo sapiens OX=9606 GN=SLC29A3 PE=1 SV=3
2800	TRUE	Q9BVC6|TM109_HUMAN	97.774	2	2	7	12	1.71429	15	12	0.8	1			1	6	6	12	12	1	9	17	1.88889		26210	Transmembrane protein 109 OS=Homo sapiens OX=9606 GN=TMEM109 PE=1 SV=1
495	TRUE	Q8N766|EMC1_HUMAN	292.589	20	20	35	60	1.71429	44	78	1.77273	6			2			46	57	1.23913	39	50	1.28205	Carbamidomethylation	111759	ER membrane protein complex subunit 1 OS=Homo sapiens OX=9606 GN=EMC1 PE=1 SV=1
1881	TRUE	Q8TF42|UBS3B_HUMAN	160.423	6	6	7	12	1.71429	7	13	1.85714	2	1	0.5	1	2	2	7	11	1.57143	6	7	1.16667	Carbamidomethylation	72695.9	Ubiquitin-associated and SH3 domain-containing protein B OS=Homo sapiens OX=9606 GN=UBASH3B PE=1 SV=2
942	TRUE	Q9Y5L0|TNPO3_HUMAN	238.672	11	11	31	53	1.70968	32	72	2.25	1	3	3	1	8	8	26	24	0.923077		38	38	Carbamidomethylation	104203	Transportin-3 OS=Homo sapiens OX=9606 GN=TNPO3 PE=1 SV=3
1159	TRUE	P51798|CLCN7_HUMAN	218.154	8	8	10	17	1.7	19	44	2.31579							6	15	2.5	7	37	5.28571	Carbamidomethylation	88679.1	H(+)/Cl(-) exchange transporter 7 OS=Homo sapiens OX=9606 GN=CLCN7 PE=1 SV=2
1151	TRUE	Q9Y613|FHOD1_HUMAN	219.089	11	11	10	17	1.7	5	2	0.4	4	1	0.25	2	2	1	27	18	0.666667	8	13	1.625	Carbamidomethylation	126551	FH1/FH2 domain-containing protein 1 OS=Homo sapiens OX=9606 GN=FHOD1 PE=1 SV=3
3581	TRUE	Q7Z5L9|I2BP2_HUMAN	52.4914	1	1					5	5											3	3		61024.6	Interferon regulatory factor 2-binding protein 2 OS=Homo sapiens OX=9606 GN=IRF2BP2 PE=1 SV=2
1198	TRUE	Q9NUJ1|ABHDA_HUMAN	214.624	8	8	23	39	1.69565	27	40	1.48148	29	37	1.27586	24	28	1.16667	40	46	1.15	40	42	1.05		33932.5	Mycophenolic acid acyl-glucuronide esterase, mitochondrial OS=Homo sapiens OX=9606 GN=ABHD10 PE=1 SV=1
1428	TRUE	P20339|RAB5A_HUMAN	195.425	8	5	13	22	1.69231	29	30	1.03448	16	10	0.625	12	15	1.25	20	20	1	23	26	1.13043	Carbamidomethylation; Oxidation (M)	23658.7	Ras-related protein Rab-5A OS=Homo sapiens OX=9606 GN=RAB5A PE=1 SV=2
1270	TRUE	Q9UJZ1|STML2_HUMAN	207.508	6	6	13	22	1.69231	28	21	0.75	11	12	1.09091	16	4	0.25	24	24	1	41	29	0.707317		38534.1	Stomatin-like protein 2, mitochondrial OS=Homo sapiens OX=9606 GN=STOML2 PE=1 SV=1
253	TRUE	P01889|HLAB_HUMAN	336.658	17	5	55	93	1.69091	102	225	2.20588	61	97	1.59016	40	223	5.575	106	142	1.33962	123	228	1.85366	Carbamidomethylation; Oxidation (M)	40460.1	HLA class I histocompatibility antigen, B alpha chain OS=Homo sapiens OX=9606 GN=HLA-B PE=1 SV=3
3601	TRUE	Q9Y296|TPPC4_HUMAN	51.1976	1	1					2	2											3	3		24340	Trafficking protein particle complex subunit 4 OS=Homo sapiens OX=9606 GN=TRAPPC4 PE=1 SV=1
1406	TRUE	P13686|PPA5_HUMAN	197.562	7	7	16	27	1.6875	10	24	2.4	11	13	1.18182	7	12	1.71429	14	32	2.28571	12	22	1.83333	Carbamidomethylation; Oxidation (M)	36598.8	Tartrate-resistant acid phosphatase type 5 OS=Homo sapiens OX=9606 GN=ACP5 PE=1 SV=3
1219	TRUE	Q9NUU7|DD19A_HUMAN	211.744	10	10	16	27	1.6875	16	32	2	10	14	1.4	16	10	0.625	10	13	1.3	11	18	1.63636	Carbamidomethylation	53975	ATP-dependent RNA helicase DDX19A OS=Homo sapiens OX=9606 GN=DDX19A PE=1 SV=1
1219	TRUE	Q9UMR2|DD19B_HUMAN	211.744	10	10	16	27	1.6875	16	32	2	10	14	1.4	16	10	0.625	10	13	1.3	11	18	1.63636	Carbamidomethylation	53926.8	ATP-dependent RNA helicase DDX19B OS=Homo sapiens OX=9606 GN=DDX19B PE=1 SV=1
711	TRUE	O00159|MYO1C_HUMAN	261.279	15	14	28	47	1.67857	40	46	1.15	3	7	2.33333	8	7	0.875	34	37	1.08824	27	49	1.81481	Carbamidomethylation	121682	Unconventional myosin-Ic OS=Homo sapiens OX=9606 GN=MYO1C PE=1 SV=4
2926	TRUE	P04637|P53_HUMAN	89.9643	1	1																	3	3		43653.2	Cellular tumor antigen p53 OS=Homo sapiens OX=9606 GN=TP53 PE=1 SV=4
1490	TRUE	Q9Y666|S12A7_HUMAN	190.447	8	8	6	10	1.66667	4	46	11.5	1	5	5		5	5	3	14	4.66667		16	16	Carbamidomethylation	119106	Solute carrier family 12 member 7 OS=Homo sapiens OX=9606 GN=SLC12A7 PE=1 SV=3
2298	TRUE	Q16644|MAPK3_HUMAN	131.532	4	2	9	15	1.66667	6	8	1.33333	5	10	2		10	10	6	9	1.5	1	10	10		42987	MAP kinase-activated protein kinase 3 OS=Homo sapiens OX=9606 GN=MAPKAPK3 PE=1 SV=1
1189	TRUE	Q16795|NDUA9_HUMAN	215.37	10	10	24	40	1.66667	53	44	0.830189		2	2		38	38	12	28	2.33333	12	44	3.66667		42509.5	NADH dehydrogenase [ubiquinone] 1 alpha subcomplex subunit 9, mitochondrial OS=Homo sapiens OX=9606 GN=NDUFA9 PE=1 SV=2
3487	TRUE	Q96SK2|TM209_HUMAN	56.6562	1	1																	3	3		62921.7	Transmembrane protein 209 OS=Homo sapiens OX=9606 GN=TMEM209 PE=1 SV=2
3490	TRUE	P41222|PTGDS_HUMAN	56.486	1	1																	3	3		21028.8	Prostaglandin-H2 D-isomerase OS=Homo sapiens OX=9606 GN=PTGDS PE=1 SV=1
3644	TRUE	Q08AE8|SPIR1_HUMAN	49.1167	1	1																	3	3		85543.6	Protein spire homolog 1 OS=Homo sapiens OX=9606 GN=SPIRE1 PE=1 SV=3
3772	TRUE	Q9Y256|FACE2_HUMAN	42.6266	1	1																	3	3		35832.7	CAAX prenyl protease 2 OS=Homo sapiens OX=9606 GN=RCE1 PE=1 SV=1
3030	TRUE	Q15650|TRIP4_HUMAN	83.1247	1	1													3			1	3	3		66146.2	Activating signal cointegrator 1 OS=Homo sapiens OX=9606 GN=TRIP4 PE=1 SV=4
1220	TRUE	Q13867|BLMH_HUMAN	211.741	7	7	15	25	1.66667	15	25	1.66667	2	10	5	2	7	3.5	9	22	2.44444	9	32	3.55556	Carbamidomethylation; Oxidation (M)	52562.2	Bleomycin hydrolase OS=Homo sapiens OX=9606 GN=BLMH PE=1 SV=1
1929	TRUE	Q86XP3|DDX42_HUMAN	157.131	6	6	3	5	1.66667	5	7	1.4	1	1	1		3	3	7	7	1	3	10	3.33333		102975	ATP-dependent RNA helicase DDX42 OS=Homo sapiens OX=9606 GN=DDX42 PE=1 SV=1
1805	TRUE	O00471|EXOC5_HUMAN	164.641	9	9	3	5	1.66667	3	16	5.33333		1	1					14	14	2	6	3	Carbamidomethylation	81852.9	Exocyst complex component 5 OS=Homo sapiens OX=9606 GN=EXOC5 PE=1 SV=1
1322	TRUE	Q9Y6E0|STK24_HUMAN	203.822	7	7	9	15	1.66667	12	48	4		2	2		3	3	25	27	1.08	20	42	2.1	Carbamidomethylation	49308	Serine/threonine-protein kinase 24 OS=Homo sapiens OX=9606 GN=STK24 PE=1 SV=1
1212	TRUE	A0FGR8|ESYT2_HUMAN	212.336	13	13	9	15	1.66667	14	27	1.92857							18	19	1.05556	11	23	2.09091	Carbamidomethylation	102357	Extended synaptotagmin-2 OS=Homo sapiens OX=9606 GN=ESYT2 PE=1 SV=1
2301	TRUE	Q13427|PPIG_HUMAN	131.406	4	4	3	5	1.66667	1	1	1		1	1				5	7	1.4	4	8	2	Carbamidomethylation	88617.2	Peptidyl-prolyl cis-trans isomerase G OS=Homo sapiens OX=9606 GN=PPIG PE=1 SV=2
2203	TRUE	Q9BT22|ALG1_HUMAN	139.171	3	3	9	15	1.66667	6	25	4.16667		5	5		7	7	4	7	1.75	4	7	1.75		52518.1	Chitobiosyldiphosphodolichol beta-mannosyltransferase OS=Homo sapiens OX=9606 GN=ALG1 PE=1 SV=2
1762	TRUE	P35754|GLRX1_HUMAN	167.432	6	6	15	25	1.66667	20	16	0.8	20			19	13	0.684211	19	20	1.05263	18	28	1.55556	Carbamidomethylation	11775.7	Glutaredoxin-1 OS=Homo sapiens OX=9606 GN=GLRX PE=1 SV=2
2488	TRUE	P62304|RUXE_HUMAN	117.053	3	3	6	10	1.66667	8	5	0.625	23	16	0.695652	23	7	0.304348	8	7	0.875	4	6	1.5	Carbamidomethylation; Oxidation (M)	10803.6	Small nuclear ribonucleoprotein E OS=Homo sapiens OX=9606 GN=SNRPE PE=1 SV=1
1665	TRUE	P60510|PP4C_HUMAN	175.334	7	6	6	10	1.66667	2	15	7.5	1	6	6		9	9	4	4	1	4	5	1.25	Carbamidomethylation	35079.9	Serine/threonine-protein phosphatase 4 catalytic subunit OS=Homo sapiens OX=9606 GN=PPP4C PE=1 SV=1
1391	TRUE	P49585|PCY1A_HUMAN	198.527	5	5	12	20	1.66667	21	23	1.09524	4	5	1.25	1	3	3	11	8	0.727273	15	16	1.06667		41731	Choline-phosphate cytidylyltransferase A OS=Homo sapiens OX=9606 GN=PCYT1A PE=1 SV=2
745	TRUE	P24557|THAS_HUMAN	257.855	13	13	33	55	1.66667	39	50	1.28205	44	48	1.09091	14	52	3.71429	29	42	1.44828	37	38	1.02703	Carbamidomethylation	60518.3	Thromboxane-A synthase OS=Homo sapiens OX=9606 GN=TBXAS1 PE=1 SV=3
1681	TRUE	O75064|DEN4B_HUMAN	174.025	9	9	3	5	1.66667	9	23	2.55556		1	1				1	1	1	2	2	1		163847	DENN domain-containing protein 4B OS=Homo sapiens OX=9606 GN=DENND4B PE=1 SV=4
2288	TRUE	Q9Y5S2|MRCKB_HUMAN	132.561	8	8	3	5	1.66667	8	6	0.75								1	1	1	1	1	Carbamidomethylation	194315	Serine/threonine-protein kinase MRCK beta OS=Homo sapiens OX=9606 GN=CDC42BPB PE=1 SV=2
1709	TRUE	O95299|NDUAA_HUMAN	171.833	6	6	3	5	1.66667	15	28	1.86667	7	3	0.428571		8	8	8	9	1.125	14	12	0.857143	Carbamidomethylation	40750.6	NADH dehydrogenase [ubiquinone] 1 alpha subcomplex subunit 10, mitochondrial OS=Homo sapiens OX=9606 GN=NDUFA10 PE=1 SV=1
2744	TRUE	Q5SRD1|TI23B_HUMAN	100.99	2	2	3	5	1.66667	3	7	2.33333	3	14	4.66667		19	19	6	8	1.33333	9	7	0.777778		19669.5	Mitochondrial import inner membrane translocase subunit Tim23B OS=Homo sapiens OX=9606 GN=TIMM23B PE=1 SV=3
2744	TRUE	O14925|TIM23_HUMAN	100.99	2	2	3	5	1.66667	3	7	2.33333	3	14	4.66667		19	19	6	8	1.33333	9	7	0.777778		21943.1	Mitochondrial import inner membrane translocase subunit Tim23 OS=Homo sapiens OX=9606 GN=TIMM23 PE=1 SV=1
1921	TRUE	O60739|EIF1B_HUMAN	157.449	4	4	6	10	1.66667	4	8	2	11	12	1.09091	20	5	0.25	2	3	1.5	3	2	0.666667		12823.6	Eukaryotic translation initiation factor 1b OS=Homo sapiens OX=9606 GN=EIF1B PE=1 SV=2
1921	TRUE	P41567|EIF1_HUMAN	157.449	4	4	6	10	1.66667	4	8	2	11	12	1.09091	20	5	0.25	2	3	1.5	3	2	0.666667		12732.5	Eukaryotic translation initiation factor 1 OS=Homo sapiens OX=9606 GN=EIF1 PE=1 SV=1
2453	TRUE	P37108|SRP14_HUMAN	119.826	2	2	3	5	1.66667	5	5	1	7	15	2.14286	11	12	1.09091	4	8	2	7	4	0.571429		14569.9	Signal recognition particle 14 kDa protein OS=Homo sapiens OX=9606 GN=SRP14 PE=1 SV=2
1944	TRUE	P19838|NFKB1_HUMAN	156.018	5	5	3	5	1.66667	9	25	2.77778	7	8	1.14286	3	6	2		1	1	2			Carbamidomethylation	105356	Nuclear factor NF-kappa-B p105 subunit OS=Homo sapiens OX=9606 GN=NFKB1 PE=1 SV=2
2869	TRUE	O60861|GAS7_HUMAN	93.3752	2	2	3	5	1.66667	14	17	1.21429					3	3	4							54371.4	Growth arrest-specific protein 7 OS=Homo sapiens OX=9606 GN=GAS7 PE=1 SV=3
2118	TRUE	Q7L9L4|MOB1B_HUMAN	144.321	4	4	3	5	1.66667	9	7	0.777778	10	19	1.9	21	48	2.28571								25090.8	MOB kinase activator 1B OS=Homo sapiens OX=9606 GN=MOB1B PE=1 SV=3
2118	TRUE	Q9H8S9|MOB1A_HUMAN	144.321	4	4	3	5	1.66667	9	7	0.777778	10	19	1.9	21	48	2.28571								25079.8	MOB kinase activator 1A OS=Homo sapiens OX=9606 GN=MOB1A PE=1 SV=4
2532	TRUE	Q9BWH2|FUND2_HUMAN	114.594	2	2	3	5	1.66667	4	4	1	10			7	6	0.857143	4			2				20675.7	FUN14 domain-containing protein 2 OS=Homo sapiens OX=9606 GN=FUNDC2 PE=1 SV=2
425	TRUE	P26639|SYTC_HUMAN	301.679	26	26	50	83	1.66	54	128	2.37037	6	25	4.16667	20	53	2.65	79	83	1.05063	84	102	1.21429	Carbamidomethylation	83435.1	Threonine--tRNA ligase 1, cytoplasmic OS=Homo sapiens OX=9606 GN=TARS1 PE=1 SV=3
972	TRUE	Q14344|GNA13_HUMAN	235.656	13	12	26	43	1.65385	49	68	1.38776	34	23	0.676471	35	57	1.62857	18	20	1.11111	23	27	1.17391	Carbamidomethylation	44049.6	Guanine nucleotide-binding protein subunit alpha-13 OS=Homo sapiens OX=9606 GN=GNA13 PE=1 SV=2
1025	TRUE	Q9NTJ5|SAC1_HUMAN	230.042	11	11	20	33	1.65	40	37	0.925		9	9	3	8	2.66667	21	22	1.04762	9	17	1.88889	Carbamidomethylation	66966.9	Phosphatidylinositol-3-phosphatase SAC1 OS=Homo sapiens OX=9606 GN=SACM1L PE=1 SV=2
1343	TRUE	O15264|MK13_HUMAN	202.754	12	12	17	28	1.64706	7	26	3.71429	17	16	0.941176	2	16	8	19	24	1.26316	14	19	1.35714	Carbamidomethylation	42089.6	Mitogen-activated protein kinase 13 OS=Homo sapiens OX=9606 GN=MAPK13 PE=1 SV=1
2115	TRUE	Q969M3|YIPF5_HUMAN	144.648	3	3	14	23	1.64286	27	38	1.40741		22	22				13	22	1.69231		23	23		27989.3	Protein YIPF5 OS=Homo sapiens OX=9606 GN=YIPF5 PE=1 SV=1
3038	TRUE	Q14738|2A5D_HUMAN	82.654	1	1	2	8	4		4	4							7	8	1.14286	3	8	2.66667		69991.8	Serine/threonine-protein phosphatase 2A 56 kDa regulatory subunit delta isoform OS=Homo sapiens OX=9606 GN=PPP2R5D PE=1 SV=1
1354	TRUE	Q15257|PTPA_HUMAN	201.938	8	8	14	23	1.64286	20	22	1.1	4	9	2.25	13	27	2.07692	26	27	1.03846	13	23	1.76923		40667.5	Serine/threonine-protein phosphatase 2A activator OS=Homo sapiens OX=9606 GN=PTPA PE=1 SV=3
23	TRUE	Q63HN8|RN213_HUMAN	481.958	135	135	86	141	1.63953	522	699	1.33908	3			28	127	4.53571	39	70	1.79487	180	245	1.36111	Carbamidomethylation	591407	E3 ubiquitin-protein ligase RNF213 OS=Homo sapiens OX=9606 GN=RNF213 PE=1 SV=3
1787	TRUE	O60645|EXOC3_HUMAN	165.779	8	8	11	18	1.63636	7	22	3.14286					2	2	4	12	3	5	8	1.6		85567.4	Exocyst complex component 3 OS=Homo sapiens OX=9606 GN=EXOC3 PE=1 SV=3
765	TRUE	Q96GA7|SDSL_HUMAN	256.152	9	9	30	49	1.63333	34	41	1.20588	42	47	1.11905	24	33	1.375	31	37	1.19355	25	35	1.4	Carbamidomethylation	34674.2	Serine dehydratase-like OS=Homo sapiens OX=9606 GN=SDSL PE=1 SV=1
141	TRUE	P14780|MMP9_HUMAN	372.565	37	37	95	155	1.63158	72	226	3.13889	52	125	2.40385	9	124	13.7778	54	123	2.27778	54	141	2.61111	Carbamidomethylation; Oxidation (M)	78458.2	Matrix metalloproteinase-9 OS=Homo sapiens OX=9606 GN=MMP9 PE=1 SV=3
96	TRUE	Q13488|VPP3_HUMAN	392.526	39	38	132	215	1.62879	160	273	1.70625	108	150	1.38889	83	174	2.09639	157	226	1.43949	165	239	1.44848	Carbamidomethylation; Oxidation (M)	92968	V-type proton ATPase 116 kDa subunit a3 OS=Homo sapiens OX=9606 GN=TCIRG1 PE=1 SV=3
2057	TRUE	O15258|RER1_HUMAN	148.257	3	3	8	13	1.625	5	8	1.6	9	15	1.66667	11	26	2.36364	19	14	0.736842	9	9	1	Oxidation (M)	22958	Protein RER1 OS=Homo sapiens OX=9606 GN=RER1 PE=1 SV=1
1088	TRUE	Q53EU6|GPAT3_HUMAN	224.047	9	9	29	47	1.62069	38	37	0.973684	9	8	0.888889		7	7	36	49	1.36111	29	33	1.13793		48705.2	Glycerol-3-phosphate acyltransferase 3 OS=Homo sapiens OX=9606 GN=GPAT3 PE=1 SV=2
1447	TRUE	Q13619|CUL4A_HUMAN	194.208	10	6	21	34	1.61905	10	50	5	3	1	0.333333	2	4	2	12	19	1.58333	1	17	17	Carbamidomethylation	87680.2	Cullin-4A OS=Homo sapiens OX=9606 GN=CUL4A PE=1 SV=3
1387	TRUE	Q07021|C1QBP_HUMAN	198.812	8	8	13	21	1.61538	14	18	1.28571	29	18	0.62069	29	8	0.275862	23	20	0.869565	26	30	1.15385	Carbamidomethylation	31362.2	Complement component 1 Q subcomponent-binding protein, mitochondrial OS=Homo sapiens OX=9606 GN=C1QBP PE=1 SV=1
1772	TRUE	Q9BRX8|PXL2A_HUMAN	166.974	5	5	13	21	1.61538	18	28	1.55556	15	16	1.06667	13	20	1.53846	20	17	0.85	17	15	0.882353		25764.1	Peroxiredoxin-like 2A OS=Homo sapiens OX=9606 GN=PRXL2A PE=1 SV=3
1182	TRUE	O15400|STX7_HUMAN	215.727	7	7	18	29	1.61111	26	20	0.769231	19	15	0.789474	20	14	0.7	21	23	1.09524	28	30	1.07143	Carbamidomethylation	29815.5	Syntaxin-7 OS=Homo sapiens OX=9606 GN=STX7 PE=1 SV=4
586	FALSE	P57721|PCBP3_HUMAN	169.701	3	1	27	70	2.59259	38	105	2.76316	32	59	1.84375	27	59	2.18519	94	138	1.46809	61	157	2.57377	Oxidation (M); Carbamidomethylation	39465.2	Poly(rC)-binding protein 3 OS=Homo sapiens OX=9606 GN=PCBP3 PE=1 SV=2
401	TRUE	Q13501|SQSTM_HUMAN	305.254	15	15	51	82	1.60784	38	76	2	51	98	1.92157	21	77	3.66667	29	51	1.75862	27	50	1.85185	Carbamidomethylation; Oxidation (M)	47687.2	Sequestosome-1 OS=Homo sapiens OX=9606 GN=SQSTM1 PE=1 SV=1
199	TRUE	P36222|CH3L1_HUMAN	353.054	24	24	73	117	1.60274	72	271	3.76389	108	195	1.80556	59	315	5.33898	58	116	2	61	181	2.96721	Carbamidomethylation; Oxidation (M)	42625.5	Chitinase-3-like protein 1 OS=Homo sapiens OX=9606 GN=CHI3L1 PE=1 SV=2
1178	TRUE	Q15036|SNX17_HUMAN	215.81	10	10	5	8	1.6	1	20	20	7	12	1.71429	1	49	49	16	26	1.625	5	14	2.8		52901.2	Sorting nexin-17 OS=Homo sapiens OX=9606 GN=SNX17 PE=1 SV=1
1436	TRUE	Q6PI48|SYDM_HUMAN	195.117	8	8	15	24	1.6	20	35	1.75	2	3	1.5				24	30	1.25	10	25	2.5	Carbamidomethylation	73562.7	Aspartate--tRNA ligase, mitochondrial OS=Homo sapiens OX=9606 GN=DARS2 PE=1 SV=1
201	FALSE	P63096|GNAI1_HUMAN	221.647	7	1	56	76	1.35714	67	131	1.95522	33	33	1	21	36	1.71429	30	42	1.4	27	68	2.51852	Carbamidomethylation	40361.1	Guanine nucleotide-binding protein G(i) subunit alpha-1 OS=Homo sapiens OX=9606 GN=GNAI1 PE=1 SV=2
1076	TRUE	Q6ICG6|K0930_HUMAN	225.946	10	10	10	16	1.6	13	32	2.46154	3	9	3	1	15	15	24	38	1.58333	23	38	1.65217		45794.1	Uncharacterized protein KIAA0930 OS=Homo sapiens OX=9606 GN=KIAA0930 PE=1 SV=1
1226	TRUE	P28070|PSB4_HUMAN	211.228	7	7	15	24	1.6	32	29	0.90625	13	23	1.76923	21	46	2.19048	27	18	0.666667	18	27	1.5	Oxidation (M)	29204.2	Proteasome subunit beta type-4 OS=Homo sapiens OX=9606 GN=PSMB4 PE=1 SV=4
1168	TRUE	Q8N1F7|NUP93_HUMAN	217.062	12	12	10	16	1.6	18	28	1.55556	1	1	1	3	7	2.33333	9	10	1.11111	9	12	1.33333	Carbamidomethylation	93488.3	Nuclear pore complex protein Nup93 OS=Homo sapiens OX=9606 GN=NUP93 PE=1 SV=2
936	TRUE	Q9Y2Q3|GSTK1_HUMAN	239.13	10	10	15	24	1.6	34	46	1.35294	26	21	0.807692	25	25	1	30	30	1	38	46	1.21053	Oxidation (M); Carbamidomethylation	25496.9	Glutathione S-transferase kappa 1 OS=Homo sapiens OX=9606 GN=GSTK1 PE=1 SV=3
2199	TRUE	Q92804|RBP56_HUMAN	139.256	3	2	5	8	1.6	10	9	0.9	3	3	1	2	7	3.5	7	6	0.857143	6	7	1.16667	Carbamidomethylation	61829.9	TATA-binding protein-associated factor 2N OS=Homo sapiens OX=9606 GN=TAF15 PE=1 SV=1
2251	TRUE	P84103|SRSF3_HUMAN	135.683	3	2	10	16	1.6	17	17	1	6	9	1.5	7	8	1.14286	5	10	2	8	7	0.875		19329.6	Serine/arginine-rich splicing factor 3 OS=Homo sapiens OX=9606 GN=SRSF3 PE=1 SV=1
16	TRUE	P13645|K1C10_HUMAN	529.498	150	131	272	434	1.59559	1955	328	0.167775	283	168	0.59364	342	206	0.602339	461	431	0.934924	667	1351	2.02549	Oxidation (M); Carbamidomethylation	58827.1	Keratin, type I cytoskeletal 10 OS=Homo sapiens OX=9606 GN=KRT10 PE=1 SV=6
948	FALSE	Q96L21|RL10L_HUMAN	160.594	3	3	27	43	1.59259	27	20	0.740741	37	25	0.675676	33	41	1.24242	12	17	1.41667	18	17	0.944444	Oxidation (M)	24518.8	60S ribosomal protein L10-like OS=Homo sapiens OX=9606 GN=RPL10L PE=1 SV=3
1514	TRUE	Q9UHY1|NRBP_HUMAN	188.819	6	6	12	19	1.58333	5	37	7.4		7	7	1	8	8	11	23	2.09091		21	21		59844.7	Nuclear receptor-binding protein OS=Homo sapiens OX=9606 GN=NRBP1 PE=1 SV=1
857	TRUE	P01903|DRA_HUMAN	247.827	6	5	12	19	1.58333	46	53	1.15217	7	8	1.14286	20	34	1.7	19	23	1.21053	38	44	1.15789	Carbamidomethylation	28606.9	HLA class II histocompatibility antigen, DR alpha chain OS=Homo sapiens OX=9606 GN=HLA-DRA PE=1 SV=1
266	TRUE	Q7Z6Z7|HUWE1_HUMAN	333.371	36	36	38	60	1.57895	47	102	2.17021	5	1	0.2	3	14	4.66667	35	60	1.71429	45	69	1.53333	Carbamidomethylation	481891	E3 ubiquitin-protein ligase HUWE1 OS=Homo sapiens OX=9606 GN=HUWE1 PE=1 SV=3
1984	TRUE	Q9NNW7|TRXR2_HUMAN	152.955	4	3	7	11	1.57143	6	12	2	13	12	0.923077		7	7	10	16	1.6	13	21	1.61538	Carbamidomethylation	56475.4	Thioredoxin reductase 2, mitochondrial OS=Homo sapiens OX=9606 GN=TXNRD2 PE=1 SV=3
3212	TRUE	Q0VGL1|LTOR4_HUMAN	71.1897	1	1					6	6	2			3			4	3	0.75	2	5	2.5		10741.3	Ragulator complex protein LAMTOR4 OS=Homo sapiens OX=9606 GN=LAMTOR4 PE=1 SV=1
774	FALSE	Q5EG05|CAR16_HUMAN	78.1373	1	1				10	10	1							8	6	0.75	2	5	2.5		22625.3	Caspase recruitment domain-containing protein 16 OS=Homo sapiens OX=9606 GN=CARD16 PE=1 SV=1
758	TRUE	O00567|NOP56_HUMAN	256.436	14	14	14	22	1.57143	23	29	1.26087	4	10	2.5	1	5	5	37	24	0.648649	41	57	1.39024	Carbamidomethylation	66049.9	Nucleolar protein 56 OS=Homo sapiens OX=9606 GN=NOP56 PE=1 SV=4
1669	TRUE	Q12792|TWF1_HUMAN	175.085	6	6	7	11	1.57143	9	12	1.33333	11	1	0.0909091	15	6	0.4	8	8	1	4	4	1		40282.7	Twinfilin-1 OS=Homo sapiens OX=9606 GN=TWF1 PE=1 SV=3
1106	TRUE	O75306|NDUS2_HUMAN	222.57	8	8	7	11	1.57143	14	31	2.21429	2	2	1	1	11	11	13	17	1.30769	20	19	0.95		52545.6	NADH dehydrogenase [ubiquinone] iron-sulfur protein 2, mitochondrial OS=Homo sapiens OX=9606 GN=NDUFS2 PE=1 SV=2
2538	TRUE	P10301|RRAS_HUMAN	114.051	2	2	7	11	1.57143	6	6	1		1	1		1	1	6	8	1.33333	6	5	0.833333		23480.5	Ras-related protein R-Ras OS=Homo sapiens OX=9606 GN=RRAS PE=1 SV=1
1691	TRUE	Q6NUQ4|TM214_HUMAN	173.322	6	6	7	11	1.57143	11	12	1.09091	2	6	3		2	2	12	8	0.666667	16	7	0.4375		77150.6	Transmembrane protein 214 OS=Homo sapiens OX=9606 GN=TMEM214 PE=1 SV=2
2417	TRUE	Q96FN4|CPNE2_HUMAN	121.99	3	2	7	11	1.57143	4	18	4.5														61189.8	Copine-2 OS=Homo sapiens OX=9606 GN=CPNE2 PE=1 SV=3
831	TRUE	P43353|AL3B1_HUMAN	249.617	9	8	39	61	1.5641	41	70	1.70732	27	28	1.03704	12	45	3.75	36	37	1.02778	45	41	0.911111	Carbamidomethylation	51839.7	Aldehyde dehydrogenase family 3 member B1 OS=Homo sapiens OX=9606 GN=ALDH3B1 PE=1 SV=1
481	TRUE	O43865|SAHH2_HUMAN	293.813	20	9	48	75	1.5625	54	73	1.35185	44	53	1.20455	4	43	10.75	46	60	1.30435	38	52	1.36842	Carbamidomethylation; Oxidation (M)	58951.4	S-adenosylhomocysteine hydrolase-like protein 1 OS=Homo sapiens OX=9606 GN=AHCYL1 PE=1 SV=2
583	TRUE	P15144|AMPN_HUMAN	279.563	22	22	43	67	1.55814	49	86	1.7551	19	19	1	12	36	3	18	32	1.77778	16	23	1.4375		109540	Aminopeptidase N OS=Homo sapiens OX=9606 GN=ANPEP PE=1 SV=4
1723	TRUE	Q9NR12|PDLI7_HUMAN	170.295	6	6	9	14	1.55556	1	18	18	1	10	10		18	18	4	14	3.5	2	16	8	Carbamidomethylation	49844.7	PDZ and LIM domain protein 7 OS=Homo sapiens OX=9606 GN=PDLIM7 PE=1 SV=1
1766	TRUE	P24390|ERD21_HUMAN	167.235	3	3	9	14	1.55556	10	8	0.8					5	5		18	18	6	18	3		24542.1	ER lumen protein-retaining receptor 1 OS=Homo sapiens OX=9606 GN=KDELR1 PE=1 SV=1
2442	TRUE	Q13572|ITPK1_HUMAN	120.746	3	3	9	14	1.55556	1	4	4					1	1	15	14	0.933333	4	6	1.5		45621	Inositol-tetrakisphosphate 1-kinase OS=Homo sapiens OX=9606 GN=ITPK1 PE=1 SV=2
641	TRUE	O14880|MGST3_HUMAN	270.855	12	12	45	70	1.55556	62	85	1.37097	65	74	1.13846	52	57	1.09615	67	65	0.970149	68	90	1.32353	Carbamidomethylation	16516.3	Microsomal glutathione S-transferase 3 OS=Homo sapiens OX=9606 GN=MGST3 PE=1 SV=1
886	TRUE	Q9BPW9|DHRS9_HUMAN	244.459	10	10	18	28	1.55556	51	50	0.980392	40	38	0.95	21	51	2.42857	29	33	1.13793	30	39	1.3	Carbamidomethylation	35227.1	Dehydrogenase/reductase SDR family member 9 OS=Homo sapiens OX=9606 GN=DHRS9 PE=1 SV=1
882	FALSE	P0CG48|UBC_HUMAN	178.475	4	4	29	45	1.55172	33	57	1.72727	16	20	1.25	19	56	2.94737	33	121	3.66667	40	125	3.125		77038.6	Polyubiquitin-C OS=Homo sapiens OX=9606 GN=UBC PE=1 SV=3
882	FALSE	P0CG47|UBB_HUMAN	178.475	4	4	29	45	1.55172	33	57	1.72727	16	20	1.25	19	56	2.94737	33	121	3.66667	40	125	3.125		25761.6	Polyubiquitin-B OS=Homo sapiens OX=9606 GN=UBB PE=1 SV=1
45	FALSE	P05062|ALDOB_HUMAN	83.148	1	1	6	6	1	4	4	1	5	8	1.6		4	4	8	9	1.125	5	12	2.4		39473	Fructose-bisphosphate aldolase B OS=Homo sapiens OX=9606 GN=ALDOB PE=1 SV=2
882	FALSE	P62987|RL40_HUMAN	178.475	4	4	29	45	1.55172	33	57	1.72727	16	20	1.25	19	56	2.94737	33	121	3.66667	40	125	3.125		14728.3	Ubiquitin-60S ribosomal protein L40 OS=Homo sapiens OX=9606 GN=UBA52 PE=1 SV=2
1539	TRUE	P30566|PUR8_HUMAN	186.591	7	7	11	17	1.54545	16	23	1.4375	2				13	13	10	10	1	7	14	2	Carbamidomethylation	54889.3	Adenylosuccinate lyase OS=Homo sapiens OX=9606 GN=ADSL PE=1 SV=2
1647	TRUE	P39687|AN32A_HUMAN	176.482	5	2	11	17	1.54545	11	9	0.818182	23	5	0.217391	6	12	2	10	7	0.7	10	10	1	Carbamidomethylation	28585.4	Acidic leucine-rich nuclear phosphoprotein 32 family member A OS=Homo sapiens OX=9606 GN=ANP32A PE=1 SV=1
563	TRUE	Q15365|PCBP1_HUMAN	282.012	13	10	79	122	1.5443	79	156	1.97468	90	130	1.44444	82	126	1.53659	130	173	1.33077	85	197	2.31765	Carbamidomethylation; Oxidation (M)	37497.8	Poly(rC)-binding protein 1 OS=Homo sapiens OX=9606 GN=PCBP1 PE=1 SV=2
2027	TRUE	Q9Y3E0|GOT1B_HUMAN	150.134	2	2	35	54	1.54286	35	27	0.771429	2				3	3	5	7	1.4	10	4	0.4		15425.7	Vesicle transport protein GOT1B OS=Homo sapiens OX=9606 GN=GOLT1B PE=1 SV=1
2238	TRUE	Q15836|VAMP3_HUMAN	136.888	2	2	13	20	1.53846	13	11	0.846154	11	5	0.454545	5	5	1	5	5	1	6	9	1.5	Oxidation (M)	11309.1	Vesicle-associated membrane protein 3 OS=Homo sapiens OX=9606 GN=VAMP3 PE=1 SV=3
1724	TRUE	Q15287|RNPS1_HUMAN	170.291	3	3	15	23	1.53333	18	20	1.11111	4	9	2.25		6	6	8	11	1.375	9	13	1.44444		34208.2	RNA-binding protein with serine-rich domain 1 OS=Homo sapiens OX=9606 GN=RNPS1 PE=1 SV=1
57	TRUE	O75643|U520_HUMAN	414.873	75	75	174	266	1.52874	155	308	1.9871	6	12	2	8	39	4.875	56	144	2.57143	45	160	3.55556	Carbamidomethylation; Oxidation (M)	244508	U5 small nuclear ribonucleoprotein 200 kDa helicase OS=Homo sapiens OX=9606 GN=SNRNP200 PE=1 SV=2
269	TRUE	P25774|CATS_HUMAN	331.748	19	19	87	133	1.52874	81	203	2.50617	46	98	2.13043	11	145	13.1818	79	115	1.4557	86	135	1.56977	Carbamidomethylation; Oxidation (M)	37495.7	Cathepsin S OS=Homo sapiens OX=9606 GN=CTSS PE=1 SV=3
628	TRUE	P30520|PURA2_HUMAN	273.289	14	14	58	88	1.51724	67	60	0.895522	41	42	1.02439	31	37	1.19355	46	49	1.06522	51	37	0.72549	Carbamidomethylation	50097.4	Adenylosuccinate synthetase isozyme 2 OS=Homo sapiens OX=9606 GN=ADSS2 PE=1 SV=3
644	TRUE	Q53GQ0|DHB12_HUMAN	270.314	15	15	39	59	1.51282	54	67	1.24074	32	45	1.40625	29	36	1.24138	62	61	0.983871	67	89	1.32836	Oxidation (M); Carbamidomethylation	34324.2	Very-long-chain 3-oxoacyl-CoA reductase OS=Homo sapiens OX=9606 GN=HSD17B12 PE=1 SV=2
1120	TRUE	Q9Y6Y0|NS1BP_HUMAN	221.662	9	9	30	45	1.5	26	56	2.15385	1	11	11		40	40	29	40	1.37931	5	40	8	Carbamidomethylation	71729.4	Influenza virus NS1A-binding protein OS=Homo sapiens OX=9606 GN=IVNS1ABP PE=1 SV=3
1266	TRUE	Q8WWM7|ATX2L_HUMAN	207.794	8	8	10	15	1.5	9	20	2.22222	1	5	5	1	26	26	8	9	1.125	2	14	7		113374	Ataxin-2-like protein OS=Homo sapiens OX=9606 GN=ATXN2L PE=1 SV=2
2896	TRUE	Q9P0S9|TM14C_HUMAN	92.066	2	2	2	3	1.5		16	16							1				7	7		11564.6	Transmembrane protein 14C OS=Homo sapiens OX=9606 GN=TMEM14C PE=1 SV=1
2404	TRUE	Q14690|RRP5_HUMAN	122.722	4	4	2	3	1.5	3	5	1.66667							4				5	5		208701	Protein RRP5 homolog OS=Homo sapiens OX=9606 GN=PDCD11 PE=1 SV=3
1844	TRUE	O00267|SPT5H_HUMAN	162.16	9	9	2	3	1.5	3	19	6.33333					3	3	2	7	3.5	3	12	4	Oxidation (M); Carbamidomethylation	121000	Transcription elongation factor SPT5 OS=Homo sapiens OX=9606 GN=SUPT5H PE=1 SV=1
2070	TRUE	Q92620|PRP16_HUMAN	147.241	6	6	2	3	1.5		19	19							4	3	0.75		4	4		140503	Pre-mRNA-splicing factor ATP-dependent RNA helicase PRP16 OS=Homo sapiens OX=9606 GN=DHX38 PE=1 SV=2
1684	TRUE	Q86TI0|TBCD1_HUMAN	173.669	7	7	6	9	1.5	9	22	2.44444					1	1	7	20	2.85714	4	14	3.5	Carbamidomethylation	133084	TBC1 domain family member 1 OS=Homo sapiens OX=9606 GN=TBC1D1 PE=1 SV=2
1803	TRUE	P21912|SDHB_HUMAN	164.857	6	6	14	21	1.5	25	15	0.6		20	20	12	13	1.08333	5	27	5.4	7	24	3.42857	Carbamidomethylation; Oxidation (M)	31629.7	Succinate dehydrogenase [ubiquinone] iron-sulfur subunit, mitochondrial OS=Homo sapiens OX=9606 GN=SDHB PE=1 SV=3
2545	TRUE	Q9Y6K9|NEMO_HUMAN	113.704	3	3	6	9	1.5	13	17	1.30769	1				2	2	3	9	3	3	9	3		48197.7	NF-kappa-B essential modulator OS=Homo sapiens OX=9606 GN=IKBKG PE=1 SV=2
2558	TRUE	Q9UNE7|CHIP_HUMAN	113.065	3	3	2	3	1.5		4	4	1			1	3	3	1	3	3	2	5	2.5		34856.2	E3 ubiquitin-protein ligase CHIP OS=Homo sapiens OX=9606 GN=STUB1 PE=1 SV=2
2165	TRUE	Q8NCA5|FA98A_HUMAN	141.467	4	3	6	9	1.5	7	8	1.14286	1	1	1	2	1	0.5	10	4	0.4	3	7	2.33333		55272.5	Protein FAM98A OS=Homo sapiens OX=9606 GN=FAM98A PE=1 SV=2
2056	TRUE	O60493|SNX3_HUMAN	148.393	4	4	6	9	1.5	8	15	1.875	6	10	1.66667	12	7	0.583333	3	9	3	3	6	2		18762.4	Sorting nexin-3 OS=Homo sapiens OX=9606 GN=SNX3 PE=1 SV=3
3033	TRUE	Q53S08|RAB6D_HUMAN	82.9987	1	1							3	1	0.333333	2	1	0.5	11	5	0.454545	3	7	2.33333		28242.1	Ras-related protein Rab-6D OS=Homo sapiens OX=9606 GN=RAB6D PE=2 SV=1
3033	TRUE	Q9H0N0|RAB6C_HUMAN	82.9987	1	1							3	1	0.333333	2	1	0.5	11	5	0.454545	3	7	2.33333		28355.2	Ras-related protein Rab-6C OS=Homo sapiens OX=9606 GN=RAB6C PE=1 SV=2
1781	TRUE	Q9Y2L5|TPPC8_HUMAN	166.148	10	10	4	6	1.5	7	16	2.28571							7	10	1.42857	2	4	2	Carbamidomethylation	160997	Trafficking protein particle complex subunit 8 OS=Homo sapiens OX=9606 GN=TRAPPC8 PE=1 SV=2
2546	TRUE	Q6ZVF9|GRIN3_HUMAN	113.651	3	3	2	3	1.5	3									7	7	1	1	2	2		82438.6	G protein-regulated inducer of neurite outgrowth 3 OS=Homo sapiens OX=9606 GN=GPRIN3 PE=2 SV=2
2220	TRUE	O75695|XRP2_HUMAN	137.946	4	4	6	9	1.5	6	9	1.5										2	4	2	Carbamidomethylation	39641.1	Protein XRP2 OS=Homo sapiens OX=9606 GN=RP2 PE=1 SV=4
2339	TRUE	P56134|ATPK_HUMAN	128.263	2	2	16	24	1.5	19	25	1.31579	30	31	1.03333	14	48	3.42857	12	26	2.16667	10	19	1.9	Oxidation (M)	10917.9	ATP synthase subunit f, mitochondrial OS=Homo sapiens OX=9606 GN=ATP5MF PE=1 SV=3
889	TRUE	P49757|NUMB_HUMAN	244.329	11	11	28	42	1.5	14	49	3.5	22	18	0.818182	5	27	5.4	24	33	1.375	18	32	1.77778	Carbamidomethylation	70803.8	Protein numb homolog OS=Homo sapiens OX=9606 GN=NUMB PE=1 SV=2
2751	TRUE	Q16563|SYPL1_HUMAN	100.808	2	2	4	6	1.5	10	8	0.8	2	2	1	1	9	9	15	19	1.26667	11	18	1.63636		28565.3	Synaptophysin-like protein 1 OS=Homo sapiens OX=9606 GN=SYPL1 PE=1 SV=1
1493	TRUE	P02792|FRIL_HUMAN	190.364	5	5	2	3	1.5	9	19	2.11111	4	3	0.75	10	5	0.5	6	13	2.16667	6	9	1.5	Carbamidomethylation	20019.7	Ferritin light chain OS=Homo sapiens OX=9606 GN=FTL PE=1 SV=2
1686	TRUE	Q9NUY8|TBC23_HUMAN	173.638	7	7	4	6	1.5	9	19	2.11111	1	1	1		1	1	16	16	1	10	15	1.5	Carbamidomethylation	78321.9	TBC1 domain family member 23 OS=Homo sapiens OX=9606 GN=TBC1D23 PE=1 SV=3
1859	TRUE	O75828|CBR3_HUMAN	161.512	3	1	10	9	0.9	13	10	0.769231	12	10	0.833333	10	8	0.8	8	6	0.75	7	16	2.28571		30850.2	Carbonyl reductase [NADPH] 3 OS=Homo sapiens OX=9606 GN=CBR3 PE=1 SV=3
1868	TRUE	Q13564|ULA1_HUMAN	160.912	5	5	4	6	1.5	5	12	2.4					4	4	8	7	0.875	5	7	1.4		60246.3	NEDD8-activating enzyme E1 regulatory subunit OS=Homo sapiens OX=9606 GN=NAE1 PE=1 SV=1
1785	TRUE	Q9H2U1|DHX36_HUMAN	165.986	7	7	4	6	1.5		20	20							6	6	1	6	8	1.33333	Carbamidomethylation	114760	ATP-dependent DNA/RNA helicase DHX36 OS=Homo sapiens OX=9606 GN=DHX36 PE=1 SV=2
1568	TRUE	P39019|RS19_HUMAN	184.082	6	6	12	18	1.5	17	17	1	21	13	0.619048	14	15	1.07143	7	6	0.857143	7	8	1.14286		16060.5	40S ribosomal protein S19 OS=Homo sapiens OX=9606 GN=RPS19 PE=1 SV=2
1664	TRUE	Q9UHQ9|NB5R1_HUMAN	175.493	8	8	8	12	1.5	10	18	1.8							11	7	0.636364	12	13	1.08333	Carbamidomethylation	34094.8	NADH-cytochrome b5 reductase 1 OS=Homo sapiens OX=9606 GN=CYB5R1 PE=1 SV=1
1495	TRUE	A2RRP1|NBAS_HUMAN	190.315	10	10	16	24	1.5	12	38	3.16667								3	3		1	1	Carbamidomethylation	268571	Neuroblastoma-amplified sequence OS=Homo sapiens OX=9606 GN=NBAS PE=1 SV=2
1759	TRUE	Q8IXI1|MIRO2_HUMAN	167.67	9	8	2	3	1.5	1	6	6							5	7	1.4	6	6	1	Carbamidomethylation	68117.8	Mitochondrial Rho GTPase 2 OS=Homo sapiens OX=9606 GN=RHOT2 PE=1 SV=2
3243	TRUE	Q8TEJ3|SH3R3_HUMAN	69.1315	2	2	2	3	1.5	3				1	1				4	2	0.5	3	3	1		92776.2	E3 ubiquitin-protein ligase SH3RF3 OS=Homo sapiens OX=9606 GN=SH3RF3 PE=1 SV=2
2011	TRUE	P14927|QCR7_HUMAN	150.811	4	4	4	6	1.5	6	9	1.5	7	3	0.428571	9	4	0.444444	6	6	1	10	9	0.9		13530.4	Cytochrome b-c1 complex subunit 7 OS=Homo sapiens OX=9606 GN=UQCRB PE=1 SV=2
2550	TRUE	Q9NRY5|F1142_HUMAN	113.596	4	4	2	3	1.5	4	2	0.5	3				1	1	8	8	1	6	5	0.833333	Carbamidomethylation	55468.2	Protein FAM114A2 OS=Homo sapiens OX=9606 GN=FAM114A2 PE=1 SV=4
1796	TRUE	Q13523|PRP4B_HUMAN	165.273	6	6	2	3	1.5	5	4	0.8							14	14	1	17	14	0.823529	Carbamidomethylation	116987	Serine/threonine-protein kinase PRP4 homolog OS=Homo sapiens OX=9606 GN=PRPF4B PE=1 SV=3
2052	TRUE	Q99961|SH3G1_HUMAN	148.611	5	5	6	9	1.5	5	6	1.2	3	1	0.333333	1	2	2	6	3	0.5	6	4	0.666667	Carbamidomethylation	41489.9	Endophilin-A2 OS=Homo sapiens OX=9606 GN=SH3GL1 PE=1 SV=1
2177	TRUE	Q9UNK0|STX8_HUMAN	140.928	3	3	2	3	1.5	2	5	2.5							8	18	2.25	14	9	0.642857		26906.7	Syntaxin-8 OS=Homo sapiens OX=9606 GN=STX8 PE=1 SV=2
2584	TRUE	O43148|MCES_HUMAN	111.427	5	5	2	3	1.5		4	4					2	2	9	8	0.888889	11	6	0.545455	Carbamidomethylation	54844.1	mRNA cap guanine-N7 methyltransferase OS=Homo sapiens OX=9606 GN=RNMT PE=1 SV=1
2406	TRUE	Q99836|MYD88_HUMAN	122.489	3	3	2	3	1.5		2	2	3	3	1		3	3	1	2	2	1			Carbamidomethylation	33233.4	Myeloid differentiation primary response protein MyD88 OS=Homo sapiens OX=9606 GN=MYD88 PE=1 SV=1
2509	TRUE	Q99590|SCAFB_HUMAN	115.963	3	3	2	3	1.5	1	2	2								1	1				Carbamidomethylation	164652	Protein SCAF11 OS=Homo sapiens OX=9606 GN=SCAF11 PE=1 SV=2
1099	FALSE	Q96A05|VATE2_HUMAN	98.2935	2	2	2	3	1.5	3	4	1.33333				2				1	1					26074.5	V-type proton ATPase subunit E 2 OS=Homo sapiens OX=9606 GN=ATP6V1E2 PE=1 SV=1
2773	TRUE	Q9UG63|ABCF2_HUMAN	99.5926	3	3	2	3	1.5	1	3	3														71290.3	ATP-binding cassette sub-family F member 2 OS=Homo sapiens OX=9606 GN=ABCF2 PE=1 SV=2
595	FALSE	P0CB38|PAB4L_HUMAN	107.134	3	2	4	6	1.5	4	1	0.25							2			2				41854	Polyadenylate-binding protein 4-like OS=Homo sapiens OX=9606 GN=PABPC4L PE=2 SV=1
915	TRUE	P62906|RL10A_HUMAN	241.128	9	9	27	40	1.48148	58	46	0.793103	48	41	0.854167	18	40	2.22222	35	32	0.914286	33	30	0.909091	Oxidation (M); Carbamidomethylation	24831.3	60S ribosomal protein L10a OS=Homo sapiens OX=9606 GN=RPL10A PE=1 SV=2
396	TRUE	Q9HD20|AT131_HUMAN	306.209	25	25	44	65	1.47727	59	75	1.27119	18	20	1.11111	1	22	22	41	55	1.34146	53	57	1.07547	Carbamidomethylation	132955	Manganese-transporting ATPase 13A1 OS=Homo sapiens OX=9606 GN=ATP13A1 PE=1 SV=2
1051	TRUE	Q14C86|GAPD1_HUMAN	228.233	12	12	21	31	1.47619	25	48	1.92	1	3	3		5	5	29	36	1.24138	15	36	2.4	Carbamidomethylation	164980	GTPase-activating protein and VPS9 domain-containing protein 1 OS=Homo sapiens OX=9606 GN=GAPVD1 PE=1 SV=2
1255	TRUE	Q9Y371|SHLB1_HUMAN	208.936	6	6	21	31	1.47619	25	24	0.96	25	52	2.08	23	41	1.78261	20	16	0.8	12	15	1.25		40796.3	Endophilin-B1 OS=Homo sapiens OX=9606 GN=SH3GLB1 PE=1 SV=1
276	TRUE	Q99613|EIF3C_HUMAN	329.886	23	23	61	90	1.47541	60	82	1.36667	59	61	1.0339	49	70	1.42857	59	50	0.847458	40	61	1.525	Carbamidomethylation; Oxidation (M)	105344	Eukaryotic translation initiation factor 3 subunit C OS=Homo sapiens OX=9606 GN=EIF3C PE=1 SV=1
276	FALSE	B5ME19|EIFCL_HUMAN	324.67	21	21	61	90	1.47541	60	81	1.35	59	61	1.0339	49	69	1.40816	56	50	0.892857	40	57	1.425	Carbamidomethylation; Oxidation (M)	105473	Eukaryotic translation initiation factor 3 subunit C-like protein OS=Homo sapiens OX=9606 GN=EIF3CL PE=1 SV=1
715	TRUE	P35610|SOAT1_HUMAN	260.819	13	13	55	81	1.47273	78	76	0.974359	27	43	1.59259	8	42	5.25	41	54	1.31707	43	62	1.44186	Oxidation (M); Carbamidomethylation	64734.6	Sterol O-acyltransferase 1 OS=Homo sapiens OX=9606 GN=SOAT1 PE=1 SV=3
532	TRUE	Q14956|GPNMB_HUMAN	286.507	17	17	68	100	1.47059	95	151	1.58947	56	57	1.01786	51	83	1.62745	52	97	1.86538	61	102	1.67213	Oxidation (M); Carbamidomethylation	63922.5	Transmembrane glycoprotein NMB OS=Homo sapiens OX=9606 GN=GPNMB PE=1 SV=2
1690	TRUE	Q15427|SF3B4_HUMAN	173.4	4	4	17	25	1.47059	15	14	0.933333	3	8	2.66667	2	12	6	17	23	1.35294	25	26	1.04		44385.7	Splicing factor 3B subunit 4 OS=Homo sapiens OX=9606 GN=SF3B4 PE=1 SV=1
385	TRUE	P42331|RHG25_HUMAN	307.502	26	26	79	116	1.46835	80	107	1.3375	15	22	1.46667	5	20	4	66	88	1.33333	60	66	1.1	Carbamidomethylation	73435.2	Rho GTPase-activating protein 25 OS=Homo sapiens OX=9606 GN=ARHGAP25 PE=1 SV=2
2041	TRUE	P0DN76|U2AF5_HUMAN	149.23	3	3	15	22	1.46667	15	14	0.933333	2	1	0.5		1	1	2	3	1.5	5			Carbamidomethylation	27872	Splicing factor U2AF 35 kDa subunit-like protein OS=Homo sapiens OX=9606 GN=U2AF1L5 PE=1 SV=1
2041	TRUE	Q01081|U2AF1_HUMAN	149.23	3	3	15	22	1.46667	15	14	0.933333	2	1	0.5		1	1	2	3	1.5	5			Carbamidomethylation	27872	Splicing factor U2AF 35 kDa subunit OS=Homo sapiens OX=9606 GN=U2AF1 PE=1 SV=3
1330	TRUE	Q5GLZ8|HERC4_HUMAN	203.306	13	13	13	19	1.46154	20	37	1.85							11	7	0.636364	2	3	1.5	Carbamidomethylation	118563	Probable E3 ubiquitin-protein ligase HERC4 OS=Homo sapiens OX=9606 GN=HERC4 PE=1 SV=1
729	TRUE	Q8IWB7|WDFY1_HUMAN	259.413	14	14	26	38	1.46154	55	48	0.872727	25	44	1.76	3	46	15.3333	46	39	0.847826	38	43	1.13158	Carbamidomethylation; Oxidation (M)	46323.7	WD repeat and FYVE domain-containing protein 1 OS=Homo sapiens OX=9606 GN=WDFY1 PE=1 SV=1
1408	TRUE	P14384|CBPM_HUMAN	197.394	11	11	24	35	1.45833	29	49	1.68966				2	10	5	30	22	0.733333	22	35	1.59091	Carbamidomethylation	50513.8	Carboxypeptidase M OS=Homo sapiens OX=9606 GN=CPM PE=1 SV=2
273	TRUE	Q5JPE7|NOMO2_HUMAN	331.046	31	31	68	99	1.45588	68	118	1.73529	19	18	0.947368	10	29	2.9	55	91	1.65455	51	99	1.94118	Carbamidomethylation	139439	Nodal modulator 2 OS=Homo sapiens OX=9606 GN=NOMO2 PE=1 SV=1
273	TRUE	P69849|NOMO3_HUMAN	331.046	31	31	68	99	1.45588	68	118	1.73529	19	18	0.947368	10	29	2.9	55	91	1.65455	51	99	1.94118	Carbamidomethylation	134134	Nodal modulator 3 OS=Homo sapiens OX=9606 GN=NOMO3 PE=1 SV=2
2073	TRUE	P27701|CD82_HUMAN	147.15	3	3	11	16	1.45455	14	19	1.35714							6	10	1.66667	9	13	1.44444	Carbamidomethylation	29625.5	CD82 antigen OS=Homo sapiens OX=9606 GN=CD82 PE=1 SV=1
1349	TRUE	O60684|IMA7_HUMAN	202.45	8	4	20	29	1.45	13	30	2.30769	9	9	1	4	9	2.25	27	19	0.703704	11	10	0.909091	Carbamidomethylation	60029.5	Importin subunit alpha-7 OS=Homo sapiens OX=9606 GN=KPNA6 PE=1 SV=1
139	TRUE	Q5VZ89|DEN4C_HUMAN	372.574	37	37	121	175	1.44628	104	135	1.29808	9	8	0.888889	1	13	13	67	78	1.16418	42	73	1.7381	Carbamidomethylation	212711	DENN domain-containing protein 4C OS=Homo sapiens OX=9606 GN=DENND4C PE=1 SV=3
1183	TRUE	Q99615|DNJC7_HUMAN	215.661	9	9	9	13	1.44444	7	24	3.42857	10	15	1.5	4	32	8	14	23	1.64286	6	20	3.33333	Carbamidomethylation; Oxidation (M)	56440.8	DnaJ homolog subfamily C member 7 OS=Homo sapiens OX=9606 GN=DNAJC7 PE=1 SV=2
1251	TRUE	P10619|PPGB_HUMAN	208.997	6	6	9	13	1.44444	10	18	1.8	16	15	0.9375	5	18	3.6	12	16	1.33333	5	16	3.2	Carbamidomethylation	54466.1	Lysosomal protective protein OS=Homo sapiens OX=9606 GN=CTSA PE=1 SV=2
1597	TRUE	O95571|ETHE1_HUMAN	181.657	6	6	9	13	1.44444	28	26	0.928571	7			3	11	3.66667	14			5	11	2.2	Carbamidomethylation	27872.9	Persulfide dioxygenase ETHE1, mitochondrial OS=Homo sapiens OX=9606 GN=ETHE1 PE=1 SV=2
2629	TRUE	Q7L7X3|TAOK1_HUMAN	108.924	3	2	9	13	1.44444	10	5	0.5		5	5	1	8	8	5	6	1.2	5	7	1.4	Carbamidomethylation	116070	Serine/threonine-protein kinase TAO1 OS=Homo sapiens OX=9606 GN=TAOK1 PE=1 SV=1
2672	TRUE	Q9NVV0|TM38B_HUMAN	106.13	3	3	9	13	1.44444	15	11	0.733333							5	6	1.2	6	4	0.666667		32509.8	Trimeric intracellular cation channel type B OS=Homo sapiens OX=9606 GN=TMEM38B PE=1 SV=1
325	TRUE	O00232|PSD12_HUMAN	321.935	19	19	68	98	1.44118	60	90	1.5	31	44	1.41935	10	61	6.1	56	78	1.39286	40	84	2.1	Carbamidomethylation; Oxidation (M)	52904.4	26S proteasome non-ATPase regulatory subunit 12 OS=Homo sapiens OX=9606 GN=PSMD12 PE=1 SV=3
699	TRUE	Q9H2U2|IPYR2_HUMAN	262.54	9	8	34	49	1.44118	55	44	0.8	31	27	0.870968	14	25	1.78571	45	44	0.977778	48	45	0.9375	Carbamidomethylation	37920.2	Inorganic pyrophosphatase 2, mitochondrial OS=Homo sapiens OX=9606 GN=PPA2 PE=1 SV=2
1851	TRUE	Q9P0M6|H2AW_HUMAN	161.86	5	4	16	23	1.4375	18	20	1.11111	7	24	3.42857	34	30	0.882353	17	15	0.882353	10	16	1.6		40058.2	Core histone macro-H2A.2 OS=Homo sapiens OX=9606 GN=MACROH2A2 PE=1 SV=3
1378	TRUE	Q92544|TM9S4_HUMAN	199.836	7	7	16	23	1.4375	12	40	3.33333	3	7	2.33333		9	9	21	35	1.66667	18	28	1.55556	Carbamidomethylation	74518.8	Transmembrane 9 superfamily member 4 OS=Homo sapiens OX=9606 GN=TM9SF4 PE=1 SV=2
2337	TRUE	Q9H0U3|MAGT1_HUMAN	128.528	3	3	16	23	1.4375	9	29	3.22222		5	5		13	13	7	6	0.857143	6	8	1.33333		38036.6	Magnesium transporter protein 1 OS=Homo sapiens OX=9606 GN=MAGT1 PE=1 SV=1
1588	TRUE	Q7Z2T5|TRM1L_HUMAN	182.509	8	8	7	10	1.42857	11	20	1.81818		2	2		4	4	6	9	1.5	4	9	2.25	Carbamidomethylation	81747.3	TRMT1-like protein OS=Homo sapiens OX=9606 GN=TRMT1L PE=1 SV=2
255	TRUE	Q9UI12|VATH_HUMAN	335.983	21	21	77	110	1.42857	100	146	1.46	99	108	1.09091	91	117	1.28571	103	155	1.50485	83	143	1.72289	Carbamidomethylation; Oxidation (M)	55883.1	V-type proton ATPase subunit H OS=Homo sapiens OX=9606 GN=ATP6V1H PE=1 SV=1
604	TRUE	Q9Y4E8|UBP15_HUMAN	276.766	22	20	21	30	1.42857	45	63	1.4		2	2				31	33	1.06452	23	32	1.3913	Carbamidomethylation	112419	Ubiquitin carboxyl-terminal hydrolase 15 OS=Homo sapiens OX=9606 GN=USP15 PE=1 SV=3
878	TRUE	P32121|ARRB2_HUMAN	245.041	11	11	21	30	1.42857	43	59	1.37209	33	28	0.848485	21	40	1.90476	34	32	0.941176	31	31	1	Carbamidomethylation	46105.8	Beta-arrestin-2 OS=Homo sapiens OX=9606 GN=ARRB2 PE=1 SV=2
2048	FALSE	Q8WXF0|SRS12_HUMAN	94.1044	2	2	7	10	1.42857	8	12	1.5	17	19	1.11765	2	5	2.5	4	3	0.75	4	4	1		30511.9	Serine/arginine-rich splicing factor 12 OS=Homo sapiens OX=9606 GN=SRSF12 PE=2 SV=1
1804	TRUE	O15357|SHIP2_HUMAN	164.718	8	8	7	10	1.42857	12	11	0.916667	1						10	5	0.5	5	5	1		138599	Phosphatidylinositol 3,4,5-trisphosphate 5-phosphatase 2 OS=Homo sapiens OX=9606 GN=INPPL1 PE=1 SV=2
2020	TRUE	P28065|PSB9_HUMAN	150.413	3	3	7	10	1.42857	7	6	0.857143				17	21	1.23529	3	7	2.33333	13	12	0.923077	Oxidation (M)	23264.3	Proteasome subunit beta type-9 OS=Homo sapiens OX=9606 GN=PSMB9 PE=1 SV=2
2655	TRUE	O00483|NDUA4_HUMAN	107.362	2	2	7	10	1.42857	10	9	0.9	14	5	0.357143	2	12	6	10	8	0.8	8	7	0.875	Carbamidomethylation	9369.86	Cytochrome c oxidase subunit NDUFA4 OS=Homo sapiens OX=9606 GN=NDUFA4 PE=1 SV=1
273	FALSE	Q15155|NOMO1_HUMAN	327.549	29	29	68	97	1.42647	68	113	1.66176	19	18	0.947368	10	29	2.9	55	91	1.65455	51	98	1.92157	Carbamidomethylation	134324	Nodal modulator 1 OS=Homo sapiens OX=9606 GN=NOMO1 PE=1 SV=5
769	TRUE	Q07960|RHG01_HUMAN	255.962	13	13	26	37	1.42308	43	45	1.04651	5	15	3	20	17	0.85	41	50	1.21951	35	53	1.51429		50435.8	Rho GTPase-activating protein 1 OS=Homo sapiens OX=9606 GN=ARHGAP1 PE=1 SV=1
513	TRUE	Q9H3U1|UN45A_HUMAN	290.145	20	20	38	54	1.42105	31	84	2.70968	2	13	6.5	2	17	8.5	22	45	2.04545	9	59	6.55556	Carbamidomethylation	103077	Protein unc-45 homolog A OS=Homo sapiens OX=9606 GN=UNC45A PE=1 SV=1
996	TRUE	Q13418|ILK_HUMAN	232.839	14	14	19	27	1.42105	29	46	1.58621	17	14	0.823529	2	15	7.5	17	23	1.35294	9	21	2.33333	Carbamidomethylation; Oxidation (M)	51419.2	Integrin-linked protein kinase OS=Homo sapiens OX=9606 GN=ILK PE=1 SV=2
755	FALSE	Q6IS14|IF5AL_HUMAN	224.171	7	7	19	27	1.42105	19	21	1.10526	28	16	0.571429	9	23	2.55556	8	7	0.875	11	15	1.36364	Carbamidomethylation; Oxidation (M)	16773.2	Eukaryotic translation initiation factor 5A-1-like OS=Homo sapiens OX=9606 GN=EIF5AL1 PE=2 SV=2
371	TRUE	Q15436|SC23A_HUMAN	309.406	18	15	57	81	1.42105	61	95	1.55738	31	31	1	17	20	1.17647	44	50	1.13636	43	51	1.18605	Carbamidomethylation	86160.8	Protein transport protein Sec23A OS=Homo sapiens OX=9606 GN=SEC23A PE=1 SV=2
229	TRUE	Q9NZB2|F120A_HUMAN	343.725	31	31	107	152	1.42056	97	179	1.84536	61	67	1.09836	19	72	3.78947	121	131	1.08264	88	141	1.60227	Carbamidomethylation	121888	Constitutive coactivator of PPAR-gamma-like protein 1 OS=Homo sapiens OX=9606 GN=FAM120A PE=1 SV=2
1778	TRUE	P05161|ISG15_HUMAN	166.352	3	3	12	17	1.41667	35	34	0.971429	29	21	0.724138	23	27	1.17391	11	15	1.36364		14	14		17887.5	Ubiquitin-like protein ISG15 OS=Homo sapiens OX=9606 GN=ISG15 PE=1 SV=5
1637	TRUE	Q92688|AN32B_HUMAN	177.735	5	2	12	17	1.41667	10	9	0.9	33	13	0.393939	8	18	2.25	10	11	1.1	14	17	1.21429	Carbamidomethylation	28787.7	Acidic leucine-rich nuclear phosphoprotein 32 family member B OS=Homo sapiens OX=9606 GN=ANP32B PE=1 SV=1
1818	TRUE	P27449|VATL_HUMAN	164.158	6	6	29	41	1.41379	39	42	1.07692	12	23	1.91667		24	24	3	13	4.33333	9	16	1.77778	Oxidation (M)	15735.7	V-type proton ATPase 16 kDa proteolipid subunit OS=Homo sapiens OX=9606 GN=ATP6V0C PE=1 SV=1
1382	TRUE	P52294|IMA5_HUMAN	199.462	7	3	17	24	1.41176	12	19	1.58333	12	13	1.08333	14	15	1.07143	30	16	0.533333	7	8	1.14286	Carbamidomethylation	60221.8	Importin subunit alpha-5 OS=Homo sapiens OX=9606 GN=KPNA1 PE=1 SV=3
574	TRUE	P16284|PECA1_HUMAN	280.593	15	15	27	38	1.40741	19	61	3.21053	7	7	1		39	39	55	75	1.36364	42	79	1.88095	Carbamidomethylation	82522.2	Platelet endothelial cell adhesion molecule OS=Homo sapiens OX=9606 GN=PECAM1 PE=1 SV=2
1510	FALSE	Q9P246|STIM2_HUMAN	47.8309	1	1														4	4	3	6	2		83971.1	Stromal interaction molecule 2 OS=Homo sapiens OX=9606 GN=STIM2 PE=1 SV=2
1130	TRUE	Q9Y295|DRG1_HUMAN	220.924	9	9	25	35	1.4	13	38	2.92308	6	33	5.5	3	37	12.3333	15	26	1.73333	5	22	4.4	Carbamidomethylation	40542.2	Developmentally-regulated GTP-binding protein 1 OS=Homo sapiens OX=9606 GN=DRG1 PE=1 SV=1
2111	TRUE	Q13098|CSN1_HUMAN	145.053	7	7	5	7	1.4	10	14	1.4	1				1	1	9	18	2	2	6	3	Carbamidomethylation	55536.6	COP9 signalosome complex subunit 1 OS=Homo sapiens OX=9606 GN=GPS1 PE=1 SV=4
981	TRUE	Q9H3S7|PTN23_HUMAN	234.684	15	15	15	21	1.4	19	43	2.26316	3	1	0.333333		4	4	4	8	2	6	11	1.83333	Carbamidomethylation	178974	Tyrosine-protein phosphatase non-receptor type 23 OS=Homo sapiens OX=9606 GN=PTPN23 PE=1 SV=1
1906	TRUE	Q9NUQ7|UFSP2_HUMAN	159.134	6	6	5	7	1.4	13	14	1.07692	1			1	1	1	16	11	0.6875	10	17	1.7		53261.3	Ufm1-specific protease 2 OS=Homo sapiens OX=9606 GN=UFSP2 PE=1 SV=3
1329	TRUE	O60826|CCD22_HUMAN	203.413	10	10	10	14	1.4	8	18	2.25					5	5	3	10	3.33333	13	22	1.69231	Oxidation (M); Carbamidomethylation	70755.6	Coiled-coil domain-containing protein 22 OS=Homo sapiens OX=9606 GN=CCDC22 PE=1 SV=1
2385	FALSE	Q13795|ARFRP_HUMAN	45.0908	1	1		1	1	1			2	2	1				1	3	3	1	2	2		22614.1	ADP-ribosylation factor-related protein 1 OS=Homo sapiens OX=9606 GN=ARFRP1 PE=1 SV=1
1986	TRUE	Q14699|RFTN1_HUMAN	152.857	4	4	5	7	1.4	9	13	1.44444	1						11	5	0.454545	4	5	1.25		63145.6	Raftlin OS=Homo sapiens OX=9606 GN=RFTN1 PE=1 SV=4
1974	TRUE	Q8WXF1|PSPC1_HUMAN	153.966	4	4	5	7	1.4	16	12	0.75				1	2	2	6	11	1.83333	9	11	1.22222		58743.6	Paraspeckle component 1 OS=Homo sapiens OX=9606 GN=PSPC1 PE=1 SV=1
1327	TRUE	P49257|LMAN1_HUMAN	203.693	9	9	10	14	1.4	6	13	2.16667	8	3	0.375	2	1	0.5	12	13	1.08333	16	19	1.1875	Oxidation (M); Carbamidomethylation	57548.9	Protein ERGIC-53 OS=Homo sapiens OX=9606 GN=LMAN1 PE=1 SV=2
3065	TRUE	Q8NFH4|NUP37_HUMAN	81.165	1	1													1	3	3		2	2		36707.6	Nucleoporin Nup37 OS=Homo sapiens OX=9606 GN=NUP37 PE=1 SV=1
2048	TRUE	O75494|SRS10_HUMAN	148.835	4	4	15	21	1.4	21	16	0.761905	19	23	1.21053	5	8	1.6	9	8	0.888889	8	9	1.125		31300.5	Serine/arginine-rich splicing factor 10 OS=Homo sapiens OX=9606 GN=SRSF10 PE=1 SV=1
798	TRUE	Q92945|FUBP2_HUMAN	252.572	12	12	50	70	1.4	57	78	1.36842	33	47	1.42424	38	35	0.921053	34	50	1.47059	38	39	1.02632		73115.3	Far upstream element-binding protein 2 OS=Homo sapiens OX=9606 GN=KHSRP PE=1 SV=4
213	FALSE	Q05193|DYN1_HUMAN	132.39	4	2	10	14	1.4	9	11	1.22222	1	3	3	4	1	0.25	1	3	3	1	1	1		97408.2	Dynamin-1 OS=Homo sapiens OX=9606 GN=DNM1 PE=1 SV=2
2830	TRUE	Q9UNX3|RL26L_HUMAN	96.538	3	3	5	7	1.4	8	6	0.75	4	2	0.5	3	7	2.33333	1	1	1		1	1		17256.2	60S ribosomal protein L26-like 1 OS=Homo sapiens OX=9606 GN=RPL26L1 PE=1 SV=1
2830	TRUE	P61254|RL26_HUMAN	96.538	3	3	5	7	1.4	8	6	0.75	4	2	0.5	3	7	2.33333	1	1	1		1	1		17258.2	60S ribosomal protein L26 OS=Homo sapiens OX=9606 GN=RPL26 PE=1 SV=1
2483	FALSE	Q9UKE5|TNIK_HUMAN	99.8911	2	2	5	7	1.4		7	7							1	1	1		1	1		154943	TRAF2 and NCK-interacting protein kinase OS=Homo sapiens OX=9606 GN=TNIK PE=1 SV=1
2483	FALSE	Q8N4C8|MINK1_HUMAN	99.8911	2	2	5	7	1.4		7	7							1	1	1		1	1		149822	Misshapen-like kinase 1 OS=Homo sapiens OX=9606 GN=MINK1 PE=1 SV=2
2757	TRUE	O60613|SEP15_HUMAN	100.605	2	2	5	7	1.4	4	5	1.25							4	3	0.75	6	5	0.833333		18060.6	Selenoprotein F OS=Homo sapiens OX=9606 GN=SELENOF PE=1 SV=4
1550	TRUE	Q6P1A2|MBOA5_HUMAN	185.688	7	7	15	21	1.4	21	30	1.42857		7	7	3	11	3.66667	20	24	1.2	22	15	0.681818		56035	Lysophospholipid acyltransferase 5 OS=Homo sapiens OX=9606 GN=LPCAT3 PE=1 SV=1
210	FALSE	Q6QEF8|CORO6_HUMAN	85.1636	1	1	12	4	0.333333	7	9	1.28571	16	19	1.1875		8	8	5	11	2.2	3	6	2	Carbamidomethylation	52762	Coronin-6 OS=Homo sapiens OX=9606 GN=CORO6 PE=1 SV=2
1791	TRUE	Q86V81|THOC4_HUMAN	165.568	4	4	5	7	1.4	8	8	1	4	2	0.5	4	8	2	6	12	2	12	8	0.666667		26887.9	THO complex subunit 4 OS=Homo sapiens OX=9606 GN=ALYREF PE=1 SV=3
1776	FALSE	Q56UQ5|TPT1L_HUMAN	78.018	1	1	6	4	0.666667	9	7	0.777778	5	6	1.2		5	5		2	2		2	2		15756.9	TPT1-like protein OS=Homo sapiens OX=9606 PE=2 SV=2
2145	TRUE	Q92575|UBXN4_HUMAN	142.795	4	4	5	7	1.4	9	16	1.77778	2			1	2	2	4	9	2.25	5	3	0.6		56777.5	UBX domain-containing protein 4 OS=Homo sapiens OX=9606 GN=UBXN4 PE=1 SV=2
2068	TRUE	P30405|PPIF_HUMAN	147.291	4	4	5	7	1.4	10	10	1	16	7	0.4375	1	7	7		9	9				Carbamidomethylation	22040.2	Peptidyl-prolyl cis-trans isomerase F, mitochondrial OS=Homo sapiens OX=9606 GN=PPIF PE=1 SV=1
1809	TRUE	Q13620|CUL4B_HUMAN	164.528	8	4	23	32	1.3913	10	45	4.5	3	1	0.333333	2	4	2	12	17	1.41667	4	10	2.5		103982	Cullin-4B OS=Homo sapiens OX=9606 GN=CUL4B PE=1 SV=4
1061	TRUE	O95336|6PGL_HUMAN	227.328	9	9	23	32	1.3913	27	26	0.962963	16	21	1.3125	15	25	1.66667	16	12	0.75	13	18	1.38462	Carbamidomethylation	27546.9	6-phosphogluconolactonase OS=Homo sapiens OX=9606 GN=PGLS PE=1 SV=2
1502	TRUE	Q9P035|HACD3_HUMAN	189.947	5	5	23	32	1.3913	30	29	0.966667	23	22	0.956522	11	12	1.09091	31	31	1	28	29	1.03571		43159.6	Very-long-chain (3R)-3-hydroxyacyl-CoA dehydratase 3 OS=Homo sapiens OX=9606 GN=HACD3 PE=1 SV=2
649	TRUE	Q13510|ASAH1_HUMAN	269.952	15	15	46	64	1.3913	90	89	0.988889	43	38	0.883721	79	82	1.03797	73	79	1.08219	91	93	1.02198	Oxidation (M)	44659.6	Acid ceramidase OS=Homo sapiens OX=9606 GN=ASAH1 PE=1 SV=5
780	TRUE	P24752|THIL_HUMAN	254.816	11	11	36	50	1.38889	25	46	1.84	49	61	1.2449	42	64	1.52381	33	56	1.69697	32	43	1.34375	Oxidation (M); Carbamidomethylation	45199.5	Acetyl-CoA acetyltransferase, mitochondrial OS=Homo sapiens OX=9606 GN=ACAT1 PE=1 SV=1
559	FALSE	Q9UKY3|CES1P_HUMAN	153.94	3	3	18	25	1.38889	13	14	1.07692	4	2	0.5	11	4	0.363636	10	10	1	9	9	1	Carbamidomethylation	30678.6	Putative inactive carboxylesterase 4 OS=Homo sapiens OX=9606 GN=CES1P1 PE=5 SV=2
1469	TRUE	O15511|ARPC5_HUMAN	192.565	5	5	13	18	1.38462	13	10	0.769231	15	9	0.6	8	7	0.875	10	13	1.3	8	14	1.75	Carbamidomethylation; Oxidation (M)	16320.4	Actin-related protein 2/3 complex subunit 5 OS=Homo sapiens OX=9606 GN=ARPC5 PE=1 SV=3
1971	TRUE	Q08209|PP2BA_HUMAN	154.209	7	3	13	18	1.38462	15	15	1	15	7	0.466667	2	19	9.5	11	7	0.636364	11	8	0.727273		58687.8	Serine/threonine-protein phosphatase 2B catalytic subunit alpha isoform OS=Homo sapiens OX=9606 GN=PPP3CA PE=1 SV=1
3790	TRUE	Q9UQ53|MGT4B_HUMAN	41.5918	1	1					1	1								2	2		2	2		63198.4	Alpha-1,3-mannosyl-glycoprotein 4-beta-N-acetylglucosaminyltransferase B OS=Homo sapiens OX=9606 GN=MGAT4B PE=1 SV=1
1725	TRUE	P21695|GPDA_HUMAN	170.27	7	7	13	18	1.38462		1	1							8	10	1.25	4	1	0.25	Carbamidomethylation	37567.6	Glycerol-3-phosphate dehydrogenase [NAD(+)], cytoplasmic OS=Homo sapiens OX=9606 GN=GPD1 PE=1 SV=4
3734	TRUE	Q96AQ6|PBIP1_HUMAN	44.3997	1	1													1	2	2		2	2		80643.3	Pre-B-cell leukemia transcription factor-interacting protein 1 OS=Homo sapiens OX=9606 GN=PBXIP1 PE=1 SV=1
3409	TRUE	P15559|NQO1_HUMAN	60.7511	1	1													1	2	2	1	2	2		30867.6	NAD(P)H dehydrogenase [quinone] 1 OS=Homo sapiens OX=9606 GN=NQO1 PE=1 SV=1
382	TRUE	Q14008|CKAP5_HUMAN	307.735	38	38	86	119	1.38372	86	140	1.62791	1	3	3		21	21	41	69	1.68293	14	63	4.5	Carbamidomethylation	225495	Cytoskeleton-associated protein 5 OS=Homo sapiens OX=9606 GN=CKAP5 PE=1 SV=3
1125	TRUE	Q9Y6D5|BIG2_HUMAN	221.407	12	7	21	29	1.38095	19	37	1.94737				1	4	4	14	13	0.928571	6	18	3	Carbamidomethylation	202038	Brefeldin A-inhibited guanine nucleotide-exchange protein 2 OS=Homo sapiens OX=9606 GN=ARFGEF2 PE=1 SV=3
1305	TRUE	P42785|PCP_HUMAN	204.618	6	6	21	29	1.38095	23	23	1	3	6	2		19	19	12	22	1.83333	17	25	1.47059		55799.8	Lysosomal Pro-X carboxypeptidase OS=Homo sapiens OX=9606 GN=PRCP PE=1 SV=1
309	FALSE	Q96SI9|STRBP_HUMAN	160.226	4	4	21	29	1.38095	20	18	0.9	1	1	1	1			21	19	0.904762	22	28	1.27273	Carbamidomethylation	73652.5	Spermatid perinuclear RNA-binding protein OS=Homo sapiens OX=9606 GN=STRBP PE=1 SV=1
877	TRUE	P05198|IF2A_HUMAN	245.091	14	14	21	29	1.38095	24	31	1.29167	20	17	0.85	16	27	1.6875	23	29	1.26087	35	38	1.08571	Carbamidomethylation; Oxidation (M)	36112.2	Eukaryotic translation initiation factor 2 subunit 1 OS=Homo sapiens OX=9606 GN=EIF2S1 PE=1 SV=3
1274	TRUE	O75915|PRAF3_HUMAN	207.376	4	4	45	62	1.37778	61	55	0.901639	3	9	3	7	32	4.57143	55	66	1.2	74	71	0.959459		21614.7	PRA1 family protein 3 OS=Homo sapiens OX=9606 GN=ARL6IP5 PE=1 SV=1
1515	TRUE	O15427|MOT4_HUMAN	188.799	7	7	16	22	1.375	10	23	2.3	16	25	1.5625	21	15	0.714286	15	19	1.26667	15	29	1.93333	Carbamidomethylation	49469.4	Monocarboxylate transporter 4 OS=Homo sapiens OX=9606 GN=SLC16A3 PE=1 SV=1
1102	TRUE	O75351|VPS4B_HUMAN	222.879	10	9	16	22	1.375	19	28	1.47368	18	7	0.388889	12	11	0.916667	26	26	1	19	33	1.73684	Carbamidomethylation	49302.1	Vacuolar protein sorting-associated protein 4B OS=Homo sapiens OX=9606 GN=VPS4B PE=1 SV=2
3398	TRUE	Q92643|GPI8_HUMAN	61.4485	1	1				1	2	2							4	6	1.5	1	2	2		45251.8	GPI-anchor transamidase OS=Homo sapiens OX=9606 GN=PIGK PE=1 SV=2
1744	TRUE	P49902|5NTC_HUMAN	168.896	8	8	8	11	1.375	11	23	2.09091					1	1	5	4	0.8	11	7	0.636364		64969.8	Cytosolic purine 5'-nucleotidase OS=Homo sapiens OX=9606 GN=NT5C2 PE=1 SV=1
568	TRUE	O43252|PAPS1_HUMAN	281.295	15	13	27	37	1.37037	34	47	1.38235	29	36	1.24138	20	48	2.4	41	48	1.17073	12	42	3.5	Carbamidomethylation; Oxidation (M)	70833.1	Bifunctional 3'-phosphoadenosine 5'-phosphosulfate synthase 1 OS=Homo sapiens OX=9606 GN=PAPSS1 PE=1 SV=2
962	TRUE	Q12905|ILF2_HUMAN	236.398	11	11	38	52	1.36842	31	65	2.09677	37	21	0.567568	20	26	1.3	59	53	0.898305	43	66	1.53488	Carbamidomethylation	43062.1	Interleukin enhancer-binding factor 2 OS=Homo sapiens OX=9606 GN=ILF2 PE=1 SV=2
950	TRUE	Q9UBS4|DJB11_HUMAN	237.761	9	9	19	26	1.36842	13	22	1.69231	20	36	1.8	15	37	2.46667	15	39	2.6	23	34	1.47826	Oxidation (M); Carbamidomethylation	40513.9	DnaJ homolog subfamily B member 11 OS=Homo sapiens OX=9606 GN=DNAJB11 PE=1 SV=1
49	FALSE	Q9H254|SPTN4_HUMAN	77.0924	1	1	3	3	1	3	4	1.33333	3	7	2.33333	2	3	1.5	3	4	1.33333	2	4	2		288985	Spectrin beta chain, non-erythrocytic 4 OS=Homo sapiens OX=9606 GN=SPTBN4 PE=1 SV=2
1300	TRUE	Q6ZMI0|PPR21_HUMAN	205.025	8	8	19	26	1.36842	12	32	2.66667							7	8	1.14286	9	9	1	Carbamidomethylation	88314.5	Protein phosphatase 1 regulatory subunit 21 OS=Homo sapiens OX=9606 GN=PPP1R21 PE=1 SV=1
1278	TRUE	Q13557|KCC2D_HUMAN	207.071	9	9	19	26	1.36842	35	36	1.02857	19	18	0.947368	25	47	1.88	32	27	0.84375	20	19	0.95		56369.4	Calcium/calmodulin-dependent protein kinase type II subunit delta OS=Homo sapiens OX=9606 GN=CAMK2D PE=1 SV=3
433	TRUE	Q9BWD1|THIC_HUMAN	300.024	18	18	52	71	1.36538	44	49	1.11364	41	76	1.85366	10	77	7.7	123	110	0.894309	69	63	0.913043	Carbamidomethylation; Oxidation (M)	41350.8	Acetyl-CoA acetyltransferase, cytosolic OS=Homo sapiens OX=9606 GN=ACAT2 PE=1 SV=2
842	TRUE	P26196|DDX6_HUMAN	249.138	13	13	44	60	1.36364	41	72	1.7561	31	28	0.903226	9	50	5.55556	31	35	1.12903	19	46	2.42105	Carbamidomethylation	54416.8	Probable ATP-dependent RNA helicase DDX6 OS=Homo sapiens OX=9606 GN=DDX6 PE=1 SV=2
1206	FALSE	B2RXH8|HNRC2_HUMAN	167.736	5	5	11	15	1.36364	12	15	1.25	16	14	0.875	14	11	0.785714	13	15	1.15385	11	12	1.09091		32072.3	Heterogeneous nuclear ribonucleoprotein C-like 2 OS=Homo sapiens OX=9606 GN=HNRNPCL2 PE=1 SV=1
1206	FALSE	P0DMR1|HNRC4_HUMAN	167.736	5	5	11	15	1.36364	12	15	1.25	16	14	0.875	14	11	0.785714	13	15	1.15385	11	12	1.09091		32029.4	Heterogeneous nuclear ribonucleoprotein C-like 4 OS=Homo sapiens OX=9606 GN=HNRNPCL4 PE=3 SV=1
1206	FALSE	O60812|HNRC1_HUMAN	167.736	5	5	11	15	1.36364	12	15	1.25	16	14	0.875	14	11	0.785714	13	15	1.15385	11	12	1.09091		32142.4	Heterogeneous nuclear ribonucleoprotein C-like 1 OS=Homo sapiens OX=9606 GN=HNRNPCL1 PE=1 SV=1
1206	FALSE	B7ZW38|HNRC3_HUMAN	167.736	5	5	11	15	1.36364	12	15	1.25	16	14	0.875	14	11	0.785714	13	15	1.15385	11	12	1.09091		32029.4	Heterogeneous nuclear ribonucleoprotein C-like 3 OS=Homo sapiens OX=9606 GN=HNRNPCL3 PE=2 SV=1
711	FALSE	O43795|MYO1B_HUMAN	118.128	2	1	11	9	0.818182	12	11	0.916667	3	4	1.33333	8	7	0.875	12	13	1.08333	8	16	2		131985	Unconventional myosin-Ib OS=Homo sapiens OX=9606 GN=MYO1B PE=1 SV=3
982	TRUE	P19012|K1C15_HUMAN	234.622	16	3	14	19	1.35714	46	5	0.108696	16	2	0.125	15			17	6	0.352941	23	56	2.43478	Oxidation (M)	49211.7	Keratin, type I cytoskeletal 15 OS=Homo sapiens OX=9606 GN=KRT15 PE=1 SV=3
1205	TRUE	Q6WKZ4|RFIP1_HUMAN	213.255	10	10	17	23	1.35294	8	4	0.5		1	1				26	23	0.884615	8	16	2		137167	Rab11 family-interacting protein 1 OS=Homo sapiens OX=9606 GN=RAB11FIP1 PE=1 SV=3
881	FALSE	P49753|ACOT2_HUMAN	241.491	8	8	20	27	1.35	28	24	0.857143	10	7	0.7		2	2	24	32	1.33333	30	35	1.16667		53218.5	Acyl-coenzyme A thioesterase 2, mitochondrial OS=Homo sapiens OX=9606 GN=ACOT2 PE=1 SV=6
917	TRUE	P49755|TMEDA_HUMAN	240.957	9	9	23	31	1.34783	37	47	1.27027	34	37	1.08824	35	34	0.971429	30	32	1.06667	24	36	1.5	Oxidation (M)	24976	Transmembrane emp24 domain-containing protein 10 OS=Homo sapiens OX=9606 GN=TMED10 PE=1 SV=2
226	TRUE	Q6P2Q9|PRP8_HUMAN	344.33	49	49	75	101	1.34667	88	173	1.96591	3	1	0.333333	2	5	2.5	21	65	3.09524	32	76	2.375	Carbamidomethylation	273600	Pre-mRNA-processing-splicing factor 8 OS=Homo sapiens OX=9606 GN=PRPF8 PE=1 SV=2
567	TRUE	P41240|CSK_HUMAN	281.492	15	15	47	63	1.34043	91	92	1.01099	42	49	1.16667	35	68	1.94286	43	38	0.883721	35	39	1.11429	Carbamidomethylation; Oxidation (M)	50704.3	Tyrosine-protein kinase CSK OS=Homo sapiens OX=9606 GN=CSK PE=1 SV=1
1977	TRUE	Q96CV9|OPTN_HUMAN	153.708	4	4	3	4	1.33333		8	8	1			1	1	1	2	17	8.5	1	15	15	Carbamidomethylation	65922	Optineurin OS=Homo sapiens OX=9606 GN=OPTN PE=1 SV=3
2526	TRUE	P31641|SC6A6_HUMAN	115.191	3	3	3	4	1.33333		5	5	1	3	3		3	3	4	4	1		5	5		69830.1	Sodium- and chloride-dependent taurine transporter OS=Homo sapiens OX=9606 GN=SLC6A6 PE=1 SV=2
3349	TRUE	P00846|ATP6_HUMAN	64.0746	1	1	2	8	4	5	8	1.6	11	6	0.545455	2	5	2.5	6	6	1	4	8	2		24817.2	ATP synthase subunit a OS=Homo sapiens OX=9606 GN=MT-ATP6 PE=1 SV=1
2700	TRUE	Q6GTX8|LAIR1_HUMAN	103.704	3	3	3	4	1.33333		8	8								3	3		4	4		31412	Leukocyte-associated immunoglobulin-like receptor 1 OS=Homo sapiens OX=9606 GN=LAIR1 PE=1 SV=1
1322	FALSE	O00506|STK25_HUMAN	64.5549	1	1											2	2		1	1	1	2	2		48111.7	Serine/threonine-protein kinase 25 OS=Homo sapiens OX=9606 GN=STK25 PE=1 SV=1
1956	TRUE	P53680|AP2S1_HUMAN	155.209	3	3	9	12	1.33333	21	23	1.09524	8	7	0.875	11	6	0.545455	7	8	1.14286	6	14	2.33333		17017.7	AP-2 complex subunit sigma OS=Homo sapiens OX=9606 GN=AP2S1 PE=1 SV=2
3819	TRUE	O60504|VINEX_HUMAN	40.6132	1	1	2	1	0.5	4						1	1	1	1	1	1		2	2		75341.1	Vinexin OS=Homo sapiens OX=9606 GN=SORBS3 PE=1 SV=2
1362	TRUE	Q9UHY7|ENOPH_HUMAN	201.144	7	7	3	4	1.33333	2	15	7.5	11	8	0.727273	5	8	1.6	23	23	1	7	16	2.28571	Carbamidomethylation	28932.7	Enolase-phosphatase E1 OS=Homo sapiens OX=9606 GN=ENOPH1 PE=1 SV=1
1560	TRUE	Q14254|FLOT2_HUMAN	184.776	7	7	3	4	1.33333	3	5	1.66667					1	1	14	19	1.35714	14	26	1.85714		47064.2	Flotillin-2 OS=Homo sapiens OX=9606 GN=FLOT2 PE=1 SV=2
3450	TRUE	O00421|CCRL2_HUMAN	58.5272	1	1					10	10							2	2	1	1	2	2		39513.4	C-C chemokine receptor-like 2 OS=Homo sapiens OX=9606 GN=CCRL2 PE=1 SV=2
1363	TRUE	Q8NI27|THOC2_HUMAN	201.125	9	9	3	4	1.33333	5	31	6.2	1						8	7	0.875	6	11	1.83333	Carbamidomethylation	182775	THO complex subunit 2 OS=Homo sapiens OX=9606 GN=THOC2 PE=1 SV=2
383	TRUE	P12955|PEPD_HUMAN	307.588	17	17	63	84	1.33333	60	100	1.66667	4	21	5.25	5	27	5.4	47	85	1.80851	49	88	1.79592	Carbamidomethylation	54548.2	Xaa-Pro dipeptidase OS=Homo sapiens OX=9606 GN=PEPD PE=1 SV=3
3051	TRUE	Q71RC2|LARP4_HUMAN	81.8756	1	1	1	2	2	1	5	5							2	2	1		2	2		80596	La-related protein 4 OS=Homo sapiens OX=9606 GN=LARP4 PE=1 SV=3
2990	TRUE	Q2M1Z3|RHG31_HUMAN	85.7394	2	1	1				5	5								1	1		2	2		156985	Rho GTPase-activating protein 31 OS=Homo sapiens OX=9606 GN=ARHGAP31 PE=1 SV=2
890	TRUE	Q14376|GALE_HUMAN	244.308	7	7	18	24	1.33333	22	16	0.727273	12	14	1.16667	11	15	1.36364	30	31	1.03333	24	43	1.79167	Carbamidomethylation	38281.7	UDP-glucose 4-epimerase OS=Homo sapiens OX=9606 GN=GALE PE=1 SV=2
2552	TRUE	Q9Y5K5|UCHL5_HUMAN	113.443	4	4	3	4	1.33333	4	12	3	4	2	0.5		4	4	3	5	1.66667	3	5	1.66667		37606.9	Ubiquitin carboxyl-terminal hydrolase isozyme L5 OS=Homo sapiens OX=9606 GN=UCHL5 PE=1 SV=3
2571	FALSE	Q9NVN3|RIC8B_HUMAN	54.1871	1	1					3	3	1							1	1	1	2	2		58824.8	Synembryn-B OS=Homo sapiens OX=9606 GN=RIC8B PE=1 SV=2
1903	TRUE	Q9HB90|RRAGC_HUMAN	159.211	7	7	3	4	1.33333		8	8	1	2	2	2	10	5	7	10	1.42857	15	25	1.66667	Carbamidomethylation	44224	Ras-related GTP-binding protein C OS=Homo sapiens OX=9606 GN=RRAGC PE=1 SV=1
2756	TRUE	P51649|SSDH_HUMAN	100.614	3	3	3	4	1.33333		7	7							7	5	0.714286	5	7	1.4	Carbamidomethylation	57214.8	Succinate-semialdehyde dehydrogenase, mitochondrial OS=Homo sapiens OX=9606 GN=ALDH5A1 PE=1 SV=2
3464	TRUE	Q8TD16|BICD2_HUMAN	57.7632	1	1					2	2							1	1	1	1	2	2		93533.1	Protein bicaudal D homolog 2 OS=Homo sapiens OX=9606 GN=BICD2 PE=1 SV=1
1299	TRUE	Q8N8Y2|VA0D2_HUMAN	205.165	10	8	12	16	1.33333	10	21	2.1	7	7	1	9	6	0.666667	31	28	0.903226	24	32	1.33333	Carbamidomethylation	40426.4	V-type proton ATPase subunit d 2 OS=Homo sapiens OX=9606 GN=ATP6V0D2 PE=1 SV=1
3053	TRUE	Q5JPI3|CC038_HUMAN	81.7478	1	1				4	5	1.25							1	1	1		2	2		37540.9	Uncharacterized protein C3orf38 OS=Homo sapiens OX=9606 GN=C3orf38 PE=1 SV=1
1320	TRUE	Q9Y376|CAB39_HUMAN	203.977	8	8	21	28	1.33333	22	24	1.09091	53	53	1	39	66	1.69231	23	33	1.43478	25	33	1.32		39869	Calcium-binding protein 39 OS=Homo sapiens OX=9606 GN=CAB39 PE=1 SV=1
2385	TRUE	P36405|ARL3_HUMAN	124.117	4	4	3	4	1.33333	6	4	0.666667	2	2	1		1	1	4	7	1.75	4	5	1.25	Carbamidomethylation	20455.5	ADP-ribosylation factor-like protein 3 OS=Homo sapiens OX=9606 GN=ARL3 PE=1 SV=2
3406	TRUE	Q9Y673|ALG5_HUMAN	61.0165	1	1	1	2	2	4	2	0.5								1	1		2	2		36946.1	Dolichyl-phosphate beta-glucosyltransferase OS=Homo sapiens OX=9606 GN=ALG5 PE=1 SV=1
934	TRUE	P78324|SHPS1_HUMAN	239.362	12	5	33	44	1.33333	36	51	1.41667	1	2	2	3	7	2.33333	44	55	1.25	35	40	1.14286	Carbamidomethylation	54966.8	Tyrosine-protein phosphatase non-receptor type substrate 1 OS=Homo sapiens OX=9606 GN=SIRPA PE=1 SV=2
1657	TRUE	Q8N0X7|SPART_HUMAN	175.847	6	6	9	12	1.33333	21	15	0.714286		1	1	1	4	4	15	15	1	21	23	1.09524	Carbamidomethylation	72833	Spartin OS=Homo sapiens OX=9606 GN=SPART PE=1 SV=1
2556	TRUE	Q07666|KHDR1_HUMAN	113.158	2	2	3	4	1.33333	9	6	0.666667							8	12	1.5	11	12	1.09091		48227.3	KH domain-containing, RNA-binding, signal transduction-associated protein 1 OS=Homo sapiens OX=9606 GN=KHDRBS1 PE=1 SV=1
3494	TRUE	Q05048|CSTF1_HUMAN	56.4059	1	1	1	1	1											1	1		2	2		48357.7	Cleavage stimulation factor subunit 1 OS=Homo sapiens OX=9606 GN=CSTF1 PE=1 SV=1
1903	FALSE	Q9NQL2|RRAGD_HUMAN	128.097	4	4	3	4	1.33333		7	7	1	2	2	2	10	5	5	8	1.6	13	14	1.07692		45587.6	Ras-related GTP-binding protein D OS=Homo sapiens OX=9606 GN=RRAGD PE=1 SV=1
1738	TRUE	P62995|TRA2B_HUMAN	169.641	3	3	12	16	1.33333	10	14	1.4	10	7	0.7	6	7	1.16667	10	20	2	21	18	0.857143	Carbamidomethylation	33665.7	Transformer-2 protein homolog beta OS=Homo sapiens OX=9606 GN=TRA2B PE=1 SV=1
3876	TRUE	Q9NPR9|GP108_HUMAN	38.1546	1	1														1	1		2	2		60632.6	Protein GPR108 OS=Homo sapiens OX=9606 GN=GPR108 PE=1 SV=3
873	TRUE	Q9Y315|DEOC_HUMAN	245.719	10	10	21	28	1.33333	27	26	0.962963	23	18	0.782609	39	24	0.615385	53	36	0.679245	47	38	0.808511	Carbamidomethylation	35230.8	Deoxyribose-phosphate aldolase OS=Homo sapiens OX=9606 GN=DERA PE=1 SV=2
3720	TRUE	Q12851|M4K2_HUMAN	45.5041	1	1													1	1	1		2	2		91555.9	Mitogen-activated protein kinase kinase kinase kinase 2 OS=Homo sapiens OX=9606 GN=MAP4K2 PE=1 SV=2
2223	FALSE	Q96FJ2|DYL2_HUMAN	111.143	2	2	9	12	1.33333	10	6	0.6	13	25	1.92308	14	18	1.28571	8	4	0.5	10	6	0.6	Carbamidomethylation	10349.8	Dynein light chain 2, cytoplasmic OS=Homo sapiens OX=9606 GN=DYNLL2 PE=1 SV=1
3488	TRUE	O95104|SCAF4_HUMAN	56.6428	1	1														1	1	1	2	2		125869	SR-related and CTD-associated factor 4 OS=Homo sapiens OX=9606 GN=SCAF4 PE=1 SV=3
3488	TRUE	Q9UPN6|SCAF8_HUMAN	56.6428	1	1														1	1	1	2	2		140519	SR-related and CTD-associated factor 8 OS=Homo sapiens OX=9606 GN=SCAF8 PE=1 SV=1
2223	TRUE	P63167|DYL1_HUMAN	137.74	3	3	9	12	1.33333	11	6	0.545455	14	25	1.78571	14	18	1.28571	9	4	0.444444	10	6	0.6	Carbamidomethylation	10365.9	Dynein light chain 1, cytoplasmic OS=Homo sapiens OX=9606 GN=DYNLL1 PE=1 SV=1
2060	TRUE	P62330|ARF6_HUMAN	148.201	6	6	3	4	1.33333	14	7	0.5	23	16	0.695652	27	22	0.814815	15	13	0.866667	19	10	0.526316	Carbamidomethylation	20082.2	ADP-ribosylation factor 6 OS=Homo sapiens OX=9606 GN=ARF6 PE=1 SV=2
596	FALSE	Q9UPY8|MARE3_HUMAN	70.2399	2	2	3	4	1.33333	1	3	3		1	1											31982.2	Microtubule-associated protein RP/EB family member 3 OS=Homo sapiens OX=9606 GN=MAPRE3 PE=1 SV=1
2684	TRUE	Q96A72|MGN2_HUMAN	105.112	3	3	3	4	1.33333	6			3	1	0.333333											17275.8	Protein mago nashi homolog 2 OS=Homo sapiens OX=9606 GN=MAGOHB PE=1 SV=1
2684	TRUE	P61326|MGN_HUMAN	105.112	3	3	3	4	1.33333	6			3	1	0.333333											17163.6	Protein mago nashi homolog OS=Homo sapiens OX=9606 GN=MAGOH PE=1 SV=1
432	TRUE	P50416|CPT1A_HUMAN	300.081	22	20	65	86	1.32308	67	121	1.80597	76	69	0.907895	57	66	1.15789	35	52	1.48571	36	65	1.80556	Oxidation (M); Carbamidomethylation	88367.6	Carnitine O-palmitoyltransferase 1, liver isoform OS=Homo sapiens OX=9606 GN=CPT1A PE=1 SV=2
1203	TRUE	P60033|CD81_HUMAN	213.857	4	4	28	37	1.32143	31	40	1.29032	21	21	1		48	48	44	45	1.02273	47	34	0.723404	Carbamidomethylation	25809.4	CD81 antigen OS=Homo sapiens OX=9606 GN=CD81 PE=1 SV=1
816	TRUE	Q9UPY3|DICER_HUMAN	251.503	18	18	25	33	1.32	32	52	1.625					3	3	8	9	1.125	2	13	6.5	Carbamidomethylation	218682	Endoribonuclease Dicer OS=Homo sapiens OX=9606 GN=DICER1 PE=1 SV=3
503	TRUE	P12931|SRC_HUMAN	291.287	16	14	47	62	1.31915	58	93	1.60345	12	22	1.83333	26	26	1	34	49	1.44118	35	45	1.28571	Carbamidomethylation	59834.8	Proto-oncogene tyrosine-protein kinase Src OS=Homo sapiens OX=9606 GN=SRC PE=1 SV=3
856	TRUE	P15170|ERF3A_HUMAN	247.916	11	6	22	29	1.31818	27	31	1.14815	14	2	0.142857	2	9	4.5	25	19	0.76	9	19	2.11111	Carbamidomethylation	55755.9	Eukaryotic peptide chain release factor GTP-binding subunit ERF3A OS=Homo sapiens OX=9606 GN=GSPT1 PE=1 SV=1
868	TRUE	P00505|AATM_HUMAN	246.687	14	14	22	29	1.31818	31	35	1.12903	25	20	0.8	16	24	1.5	28	30	1.07143	31	35	1.12903	Carbamidomethylation	47517.7	Aspartate aminotransferase, mitochondrial OS=Homo sapiens OX=9606 GN=GOT2 PE=1 SV=3
2170	TRUE	Q16186|ADRM1_HUMAN	141.244	3	3	19	25	1.31579	18	24	1.33333	3						22	15	0.681818	15	22	1.46667	Carbamidomethylation	42153.3	Proteasomal ubiquitin receptor ADRM1 OS=Homo sapiens OX=9606 GN=ADRM1 PE=1 SV=2
701	TRUE	O95466|FMNL1_HUMAN	262.38	18	16	35	46	1.31429	61	63	1.03279	6	4	0.666667	3	9	3	27	29	1.07407	24	41	1.70833	Carbamidomethylation	121854	Formin-like protein 1 OS=Homo sapiens OX=9606 GN=FMNL1 PE=1 SV=3
1403	FALSE	P62491|RB11A_HUMAN	179.108	6	6	32	42	1.3125	38	34	0.894737	15	7	0.466667	19	20	1.05263	21	17	0.809524	22	26	1.18182		24393.5	Ras-related protein Rab-11A OS=Homo sapiens OX=9606 GN=RAB11A PE=1 SV=3
222	TRUE	P07339|CATD_HUMAN	345.485	21	21	151	198	1.31126	151	282	1.86755	173	210	1.21387	102	320	3.13725	365	508	1.39178	312	582	1.86538	Carbamidomethylation; Oxidation (M)	44552.2	Cathepsin D OS=Homo sapiens OX=9606 GN=CTSD PE=1 SV=1
872	TRUE	O75563|SKAP2_HUMAN	245.775	13	13	29	38	1.31034	35	42	1.2	43	19	0.44186	30	29	0.966667	28	44	1.57143	33	31	0.939394	Carbamidomethylation	41216.8	Src kinase-associated phosphoprotein 2 OS=Homo sapiens OX=9606 GN=SKAP2 PE=1 SV=1
1850	TRUE	Q9NSB2|KRT84_HUMAN	161.878	6	1	7	12	1.71429	6	3	0.5	8						5	3	0.6	11	22	2		64842.4	Keratin, type II cuticular Hb4 OS=Homo sapiens OX=9606 GN=KRT84 PE=2 SV=2
2885	TRUE	Q7Z7H5|TMED4_HUMAN	92.6519	3	1	1			2	3	1.5	5	1	0.2		2	2	2	1	0.5		2	2	Carbamidomethylation	25942.8	Transmembrane emp24 domain-containing protein 4 OS=Homo sapiens OX=9606 GN=TMED4 PE=1 SV=1
3102	TRUE	Q96FZ7|CHMP6_HUMAN	79.0337	1	1	3	1	0.333333	2	6	3	2			2	3	1.5	4	2	0.5	1	2	2		23484.8	Charged multivesicular body protein 6 OS=Homo sapiens OX=9606 GN=CHMP6 PE=1 SV=3
1113	TRUE	P46782|RS5_HUMAN	222.155	6	6	42	55	1.30952	41	42	1.02439	46	64	1.3913	11	42	3.81818	36	25	0.694444	34	34	1	Carbamidomethylation	22876.4	40S ribosomal protein S5 OS=Homo sapiens OX=9606 GN=RPS5 PE=1 SV=4
3167	TRUE	Q8IYB7|DI3L2_HUMAN	74.7017	1	1	1	3	3	1	2	2							2	1	0.5		2	2		99279.2	DIS3-like exonuclease 2 OS=Homo sapiens OX=9606 GN=DIS3L2 PE=1 SV=4
843	FALSE	P11274|BCR_HUMAN	77.6295	1	1	3	4	1.33333	4	4	1	1			1			6	3	0.5	2	4	2		142819	Breakpoint cluster region protein OS=Homo sapiens OX=9606 GN=BCR PE=1 SV=2
237	TRUE	Q00722|PLCB2_HUMAN	342.365	33	33	117	153	1.30769	88	170	1.93182	50	53	1.06	22	61	2.77273	87	111	1.27586	71	144	2.02817	Carbamidomethylation	134024	1-phosphatidylinositol 4,5-bisphosphate phosphodiesterase beta-2 OS=Homo sapiens OX=9606 GN=PLCB2 PE=1 SV=2
1990	TRUE	Q969H8|MYDGF_HUMAN	152.456	4	4	13	17	1.30769	14	17	1.21429	13	8	0.615385	16	10	0.625	10	7	0.7	11	8	0.727273		18795.2	Myeloid-derived growth factor OS=Homo sapiens OX=9606 GN=MYDGF PE=1 SV=1
817	TRUE	P08559|ODPA_HUMAN	251.355	13	13	23	30	1.30435	33	35	1.06061	15	17	1.13333	11	8	0.727273	29	45	1.55172	29	32	1.10345	Carbamidomethylation; Oxidation (M)	43295.6	Pyruvate dehydrogenase E1 component subunit alpha, somatic form, mitochondrial OS=Homo sapiens OX=9606 GN=PDHA1 PE=1 SV=3
112	TRUE	Q9Y678|COPG1_HUMAN	383.433	36	32	179	233	1.30168	169	260	1.53846	121	101	0.834711	62	113	1.82258	164	178	1.08537	152	207	1.36184	Carbamidomethylation; Oxidation (M)	97718.2	Coatomer subunit gamma-1 OS=Homo sapiens OX=9606 GN=COPG1 PE=1 SV=1
2131	TRUE	Q16836|HCDH_HUMAN	143.762	4	4	10	13	1.3	10			1			1	1	1	7			5	12	2.4		34293.5	Hydroxyacyl-coenzyme A dehydrogenase, mitochondrial OS=Homo sapiens OX=9606 GN=HADH PE=1 SV=3
2125	TRUE	O75821|EIF3G_HUMAN	144.086	3	3	10	13	1.3	4	19	4.75	4	2	0.5	5	9	1.8	9	4	0.444444	3	7	2.33333	Carbamidomethylation	35611	Eukaryotic translation initiation factor 3 subunit G OS=Homo sapiens OX=9606 GN=EIF3G PE=1 SV=2
678	TRUE	P43007|SATT_HUMAN	265.453	11	10	30	39	1.3	35	46	1.31429	8	14	1.75	3	21	7	35	46	1.31429	37	54	1.45946		55723.1	Neutral amino acid transporter A OS=Homo sapiens OX=9606 GN=SLC1A4 PE=1 SV=1
958	TRUE	P06865|HEXA_HUMAN	236.968	13	13	30	39	1.3	34	48	1.41176	26	23	0.884615	19	32	1.68421	34	38	1.11765	28	35	1.25	Carbamidomethylation	60702.8	Beta-hexosaminidase subunit alpha OS=Homo sapiens OX=9606 GN=HEXA PE=1 SV=2
1815	TRUE	Q9BXP5|SRRT_HUMAN	164.3	6	6	10	13	1.3	7	7	1	1	2	2		2	2	8	8	1	12	14	1.16667		100666	Serrate RNA effector molecule homolog OS=Homo sapiens OX=9606 GN=SRRT PE=1 SV=1
698	TRUE	Q9UHB9|SRP68_HUMAN	262.603	16	16	50	65	1.3	71	61	0.859155	18	6	0.333333	14	12	0.857143	33	33	1	28	29	1.03571	Carbamidomethylation	70729.6	Signal recognition particle subunit SRP68 OS=Homo sapiens OX=9606 GN=SRP68 PE=1 SV=2
1332	TRUE	Q96QH2|PRAM_HUMAN	203.09	11	11	17	22	1.29412	6	12	2	3	3	1	4	1	0.25	37	31	0.837838	16	19	1.1875	Carbamidomethylation	73968.7	PML-RARA-regulated adapter molecule 1 OS=Homo sapiens OX=9606 GN=PRAM1 PE=1 SV=3
170	TRUE	P52789|HXK2_HUMAN	360.67	35	31	150	194	1.29333	163	319	1.95706	51	71	1.39216	45	117	2.6	147	157	1.06803	119	214	1.79832	Carbamidomethylation; Oxidation (M)	102380	Hexokinase-2 OS=Homo sapiens OX=9606 GN=HK2 PE=1 SV=2
1008	TRUE	Q9H2K8|TAOK3_HUMAN	231.809	15	14	24	31	1.29167	24	33	1.375	1	5	5	1	15	15	17	34	2	15	43	2.86667	Carbamidomethylation	105406	Serine/threonine-protein kinase TAO3 OS=Homo sapiens OX=9606 GN=TAOK3 PE=1 SV=2
3381	TRUE	Q5U3C3|TM164_HUMAN	62.1945	1	1		2	2		9	9		1	1		4	4					2	2		33507.8	Transmembrane protein 164 OS=Homo sapiens OX=9606 GN=TMEM164 PE=2 SV=1
730	TRUE	Q12797|ASPH_HUMAN	259.295	13	13	38	49	1.28947	38	44	1.15789	27	14	0.518519	17	16	0.941176	39	44	1.12821	32	42	1.3125		85862.6	Aspartyl/asparaginyl beta-hydroxylase OS=Homo sapiens OX=9606 GN=ASPH PE=1 SV=3
671	TRUE	O43149|ZZEF1_HUMAN	266.479	28	28	52	67	1.28846	47	97	2.06383	7	1	0.142857	6	10	1.66667	9	17	1.88889		8	8	Carbamidomethylation; Oxidation (M)	331075	Zinc finger ZZ-type and EF-hand domain-containing protein 1 OS=Homo sapiens OX=9606 GN=ZZEF1 PE=1 SV=6
86	FALSE	Q9UI47|CTNA3_HUMAN	67.5871	1	1		3	3		3	3					2	2					2	2		99808.7	Catenin alpha-3 OS=Homo sapiens OX=9606 GN=CTNNA3 PE=1 SV=2
2103	TRUE	Q5VIR6|VPS53_HUMAN	145.534	7	7	7	9	1.28571		7	7	1	1	1		2	2	3	7	2.33333		5	5	Carbamidomethylation	94405.2	Vacuolar protein sorting-associated protein 53 homolog OS=Homo sapiens OX=9606 GN=VPS53 PE=1 SV=2
1083	TRUE	Q96JC1|VPS39_HUMAN	224.975	14	14	14	18	1.28571	29	40	1.37931	3	1	0.333333	8	8	1	10	14	1.4	4	16	4	Carbamidomethylation	101809	Vam6/Vps39-like protein OS=Homo sapiens OX=9606 GN=VPS39 PE=1 SV=2
515	TRUE	Q86TI2|DPP9_HUMAN	289.952	22	22	35	45	1.28571	31	78	2.51613	2	6	3	4	17	4.25	26	39	1.5	10	34	3.4	Carbamidomethylation	98263.4	Dipeptidyl peptidase 9 OS=Homo sapiens OX=9606 GN=DPP9 PE=1 SV=3
2093	TRUE	P47813|IF1AX_HUMAN	146.087	3	3	7	9	1.28571	9	8	0.888889	20			16	22	1.375	9	12	1.33333	4	11	2.75		16460.4	Eukaryotic translation initiation factor 1A, X-chromosomal OS=Homo sapiens OX=9606 GN=EIF1AX PE=1 SV=2
2093	TRUE	O14602|IF1AY_HUMAN	146.087	3	3	7	9	1.28571	9	8	0.888889	20			16	22	1.375	9	12	1.33333	4	11	2.75		16442.4	Eukaryotic translation initiation factor 1A, Y-chromosomal OS=Homo sapiens OX=9606 GN=EIF1AY PE=1 SV=4
3410	TRUE	Q9H832|UBE2Z_HUMAN	60.7471	1	1				1	7	7					1	1					2	2	Carbamidomethylation	38210.2	Ubiquitin-conjugating enzyme E2 Z OS=Homo sapiens OX=9606 GN=UBE2Z PE=1 SV=2
2213	TRUE	Q2M2I8|AAK1_HUMAN	138.39	5	4	7	9	1.28571	5	9	1.8		2	2		4	4	7	6	0.857143	6	9	1.5	Carbamidomethylation	103885	AP2-associated protein kinase 1 OS=Homo sapiens OX=9606 GN=AAK1 PE=1 SV=3
881	TRUE	Q86TX2|ACOT1_HUMAN	244.837	9	9	21	27	1.28571	29	24	0.827586	10	7	0.7		2	2	24	32	1.33333	30	35	1.16667		46277.4	Acyl-coenzyme A thioesterase 1 OS=Homo sapiens OX=9606 GN=ACOT1 PE=1 SV=1
1262	TRUE	O43914|TYOBP_HUMAN	208.344	5	5	21	27	1.28571	14	43	3.07143	17	39	2.29412	17	67	3.94118	13	21	1.61538	15	17	1.13333		12179.1	TYRO protein tyrosine kinase-binding protein OS=Homo sapiens OX=9606 GN=TYROBP PE=1 SV=1
3225	TRUE	Q00978|IRF9_HUMAN	70.1508	1	1					2	2					1	1					2	2	Carbamidomethylation	43696.3	Interferon regulatory factor 9 OS=Homo sapiens OX=9606 GN=IRF9 PE=1 SV=1
3527	TRUE	P20333|TNR1B_HUMAN	54.9361	1	1											1	1					2	2	Carbamidomethylation	48291.3	Tumor necrosis factor receptor superfamily member 1B OS=Homo sapiens OX=9606 GN=TNFRSF1B PE=1 SV=3
1958	TRUE	Q16629|SRSF7_HUMAN	155.18	4	3	21	27	1.28571	23	16	0.695652	6	9	1.5	7	8	1.14286	5	5	1	9	9	1		27366.5	Serine/arginine-rich splicing factor 7 OS=Homo sapiens OX=9606 GN=SRSF7 PE=1 SV=1
1391	FALSE	Q9Y5K3|PCY1B_HUMAN	160.8	3	3	7	9	1.28571	10	16	1.6	4	5	1.25	1	3	3	10	7	0.7	11	8	0.727273		41940.1	Choline-phosphate cytidylyltransferase B OS=Homo sapiens OX=9606 GN=PCYT1B PE=1 SV=1
334	TRUE	Q9Y262|EIF3L_HUMAN	319.843	17	17	60	77	1.28333	66	83	1.25758	62	58	0.935484	49	46	0.938776	60	70	1.16667	58	69	1.18966	Carbamidomethylation	66727	Eukaryotic translation initiation factor 3 subunit L OS=Homo sapiens OX=9606 GN=EIF3L PE=1 SV=1
431	TRUE	P49411|EFTU_HUMAN	300.128	17	17	106	136	1.28302	102	108	1.05882	112	91	0.8125	66	81	1.22727	102	114	1.11765	87	96	1.10345	Carbamidomethylation; Oxidation (M)	49541.5	Elongation factor Tu, mitochondrial OS=Homo sapiens OX=9606 GN=TUFM PE=1 SV=2
589	TRUE	Q96BY6|DOC10_HUMAN	278.605	25	25	32	41	1.28125	53	84	1.58491	3	4	1.33333	2	12	6	17	14	0.823529	4	21	5.25	Carbamidomethylation; Oxidation (M)	249531	Dedicator of cytokinesis protein 10 OS=Homo sapiens OX=9606 GN=DOCK10 PE=1 SV=3
948	TRUE	P27635|RL10_HUMAN	238.084	7	7	50	64	1.28	57	46	0.807018	53	43	0.811321	57	53	0.929825	23	32	1.3913	29	28	0.965517	Carbamidomethylation; Oxidation (M)	24603.9	60S ribosomal protein L10 OS=Homo sapiens OX=9606 GN=RPL10 PE=1 SV=4
608	TRUE	Q03519|TAP2_HUMAN	276.017	18	16	25	32	1.28	113	82	0.725664	3	5	1.66667	32	54	1.6875	18	28	1.55556	65	60	0.923077	Carbamidomethylation	75663.8	Antigen peptide transporter 2 OS=Homo sapiens OX=9606 GN=TAP2 PE=1 SV=1
2931	TRUE	Q9UPT9|UBP22_HUMAN	89.6795	1	1		1	1		6	6											2	2		59960.6	Ubiquitin carboxyl-terminal hydrolase 22 OS=Homo sapiens OX=9606 GN=USP22 PE=1 SV=2
347	TRUE	Q96TA1|NIBA2_HUMAN	315.527	23	23	68	87	1.27941	65	78	1.2	63	70	1.11111	44	68	1.54545	59	85	1.44068	50	68	1.36	Carbamidomethylation; Oxidation (M)	84137.9	Protein Niban 2 OS=Homo sapiens OX=9606 GN=NIBAN2 PE=1 SV=3
1306	TRUE	O43314|VIP2_HUMAN	204.521	12	12	18	23	1.27778	15	18	1.2							16	18	1.125	10	13	1.3	Carbamidomethylation	140407	Inositol hexakisphosphate and diphosphoinositol-pentakisphosphate kinase 2 OS=Homo sapiens OX=9606 GN=PPIP5K2 PE=1 SV=3
1389	TRUE	Q8NBQ5|DHB11_HUMAN	198.646	5	5	18	23	1.27778	24	21	0.875	27	37	1.37037	31	35	1.12903	19	26	1.36842	28	17	0.607143		32935.8	Estradiol 17-beta-dehydrogenase 11 OS=Homo sapiens OX=9606 GN=HSD17B11 PE=1 SV=3
700	TRUE	P37802|TAGL2_HUMAN	262.519	11	11	98	125	1.27551	102	145	1.42157	130	131	1.00769	74	124	1.67568	82	91	1.10976	97	96	0.989691	Carbamidomethylation; Oxidation (M)	22391.4	Transgelin-2 OS=Homo sapiens OX=9606 GN=TAGLN2 PE=1 SV=3
716	TRUE	Q9UJS0|CMC2_HUMAN	260.743	18	14	40	51	1.275	40	47	1.175	26	17	0.653846	4	13	3.25	56	45	0.803571	52	56	1.07692	Carbamidomethylation	74175.6	Calcium-binding mitochondrial carrier protein Aralar2 OS=Homo sapiens OX=9606 GN=SLC25A13 PE=1 SV=2
242	TRUE	Q6PIU2|NCEH1_HUMAN	339.699	20	20	153	195	1.27451	188	202	1.07447	168	146	0.869048	89	139	1.5618	106	129	1.21698	125	134	1.072	Carbamidomethylation; Oxidation (M)	45807.8	Neutral cholesterol ester hydrolase 1 OS=Homo sapiens OX=9606 GN=NCEH1 PE=1 SV=3
3449	TRUE	P12694|ODBA_HUMAN	58.5432	1	1		1	1		3	3											2	2		50471	2-oxoisovalerate dehydrogenase subunit alpha, mitochondrial OS=Homo sapiens OX=9606 GN=BCKDHA PE=1 SV=2
317	TRUE	O60271|JIP4_HUMAN	323.475	25	25	84	107	1.27381	62	78	1.25806	14	18	1.28571	13	12	0.923077	69	78	1.13043	54	75	1.38889	Carbamidomethylation; Oxidation (M)	146205	C-Jun-amino-terminal kinase-interacting protein 4 OS=Homo sapiens OX=9606 GN=SPAG9 PE=1 SV=4
3533	TRUE	Q9H8U3|ZFAN3_HUMAN	54.6263	1	1					3	3											2	2	Carbamidomethylation	25184.1	AN1-type zinc finger protein 3 OS=Homo sapiens OX=9606 GN=ZFAND3 PE=1 SV=1
3050	TRUE	Q9UP95|S12A4_HUMAN	81.9776	3	1					3	3										1	2	2		120650	Solute carrier family 12 member 4 OS=Homo sapiens OX=9606 GN=SLC12A4 PE=1 SV=2
3473	TRUE	Q92503|S14L1_HUMAN	57.3609	1	1					2	2											2	2		81249.6	SEC14-like protein 1 OS=Homo sapiens OX=9606 GN=SEC14L1 PE=1 SV=2
1093	TRUE	Q8NBS9|TXND5_HUMAN	223.643	12	12	33	42	1.27273	31	36	1.16129	27	33	1.22222	7	32	4.57143	32	48	1.5	21	37	1.7619	Carbamidomethylation	47628.9	Thioredoxin domain-containing protein 5 OS=Homo sapiens OX=9606 GN=TXNDC5 PE=1 SV=2
900	TRUE	P20042|IF2B_HUMAN	242.998	10	10	22	28	1.27273	36	33	0.916667	35	31	0.885714	31	27	0.870968	26	14	0.538462	21	30	1.42857	Carbamidomethylation	38388.4	Eukaryotic translation initiation factor 2 subunit 2 OS=Homo sapiens OX=9606 GN=EIF2S2 PE=1 SV=2
1039	TRUE	P60981|DEST_HUMAN	228.874	7	7	11	14	1.27273	17	17	1	28	17	0.607143	12	21	1.75	24	25	1.04167	16	14	0.875	Carbamidomethylation	18505.7	Destrin OS=Homo sapiens OX=9606 GN=DSTN PE=1 SV=3
3635	TRUE	Q9NY12|GAR1_HUMAN	49.5338	1	1					1	1											2	2	Carbamidomethylation	22347.9	H/ACA ribonucleoprotein complex subunit 1 OS=Homo sapiens OX=9606 GN=GAR1 PE=1 SV=1
3828	TRUE	Q6P4Q7|CNNM4_HUMAN	40.3793	1	1					1	1											2	2		86606.9	Metal transporter CNNM4 OS=Homo sapiens OX=9606 GN=CNNM4 PE=1 SV=3
3872	TRUE	Q9H2Y7|ZN106_HUMAN	38.3397	1	1					1	1											2	2		208883	Zinc finger protein 106 OS=Homo sapiens OX=9606 GN=ZNF106 PE=1 SV=1
3101	TRUE	Q9HAV7|GRPE1_HUMAN	79.0889	2	2	11	14	1.27273	13	9	0.692308	7	6	0.857143	5			4	3	0.75	7	5	0.714286		24279.1	GrpE protein homolog 1, mitochondrial OS=Homo sapiens OX=9606 GN=GRPEL1 PE=1 SV=2
132	TRUE	P13667|PDIA4_HUMAN	375.964	33	32	156	198	1.26923	182	164	0.901099	176	180	1.02273	191	149	0.780105	207	218	1.05314	193	196	1.01554	Carbamidomethylation; Oxidation (M)	72932.5	Protein disulfide-isomerase A4 OS=Homo sapiens OX=9606 GN=PDIA4 PE=1 SV=2
3260	TRUE	Q86UB9|TM135_HUMAN	68.2896	1	1		1	1	4	2	0.5										1	2	2		52290.6	Transmembrane protein 135 OS=Homo sapiens OX=9606 GN=TMEM135 PE=2 SV=2
3456	TRUE	Q9NYV4|CDK12_HUMAN	58.1091	2	1	3	2	0.666667	6	2	0.333333											2	2		164155	Cyclin-dependent kinase 12 OS=Homo sapiens OX=9606 GN=CDK12 PE=1 SV=2
3354	TRUE	Q14004|CDK13_HUMAN	63.8581	2	1	1			5	1	0.2											2	2		164923	Cyclin-dependent kinase 13 OS=Homo sapiens OX=9606 GN=CDK13 PE=1 SV=2
477	TRUE	P23469|PTPRE_HUMAN	294.333	22	21	41	52	1.26829	59	58	0.983051	64	75	1.17188	63	55	0.873016	46	42	0.913043	42	56	1.33333	Carbamidomethylation	80641.7	Receptor-type tyrosine-protein phosphatase epsilon OS=Homo sapiens OX=9606 GN=PTPRE PE=1 SV=1
3098	TRUE	O14734|ACOT8_HUMAN	79.1942	1	1																	2	2		35914.2	Acyl-coenzyme A thioesterase 8 OS=Homo sapiens OX=9606 GN=ACOT8 PE=1 SV=1
3455	TRUE	Q15014|MO4L2_HUMAN	58.1225	1	1																	2	2		32307.8	Mortality factor 4-like protein 2 OS=Homo sapiens OX=9606 GN=MORF4L2 PE=1 SV=1
3461	TRUE	Q3SY69|AL1L2_HUMAN	57.908	1	1																	2	2		101746	Mitochondrial 10-formyltetrahydrofolate dehydrogenase OS=Homo sapiens OX=9606 GN=ALDH1L2 PE=1 SV=2
3480	TRUE	Q9BX68|HINT2_HUMAN	57.0457	1	1																	2	2		17161.8	Histidine triad nucleotide-binding protein 2, mitochondrial OS=Homo sapiens OX=9606 GN=HINT2 PE=1 SV=1
3501	TRUE	P18847|ATF3_HUMAN	56.1169	1	1																	2	2		20575.6	Cyclic AMP-dependent transcription factor ATF-3 OS=Homo sapiens OX=9606 GN=ATF3 PE=1 SV=2
3682	TRUE	Q96GK7|FAH2A_HUMAN	47.3344	1	1																	2	2	Carbamidomethylation	34596.2	Fumarylacetoacetate hydrolase domain-containing protein 2A OS=Homo sapiens OX=9606 GN=FAHD2A PE=1 SV=1
3801	TRUE	Q9H1K1|ISCU_HUMAN	41.2231	1	1																	2	2	Carbamidomethylation	17999	Iron-sulfur cluster assembly enzyme ISCU, mitochondrial OS=Homo sapiens OX=9606 GN=ISCU PE=1 SV=2
3856	TRUE	Q7Z403|TMC6_HUMAN	38.8264	1	1																	2	2	Carbamidomethylation	90045.3	Transmembrane channel-like protein 6 OS=Homo sapiens OX=9606 GN=TMC6 PE=1 SV=2
3922	TRUE	Q8TCE6|DEN10_HUMAN	36.377	1	1																	2	2		40513	DENN domain-containing protein 10 OS=Homo sapiens OX=9606 GN=DENND10 PE=1 SV=1
3922	TRUE	Q6NSW5|DE10B_HUMAN	36.377	1	1																	2	2		40514.1	Putative DENN domain-containing protein 10 B OS=Homo sapiens OX=9606 GN=DENND10P1 PE=5 SV=1
3753	TRUE	Q14966|ZN638_HUMAN	43.565	1	1				1													2	2		220625	Zinc finger protein 638 OS=Homo sapiens OX=9606 GN=ZNF638 PE=1 SV=2
849	TRUE	Q9Y4E6|WDR7_HUMAN	248.737	20	20	15	19	1.26667	17	39	2.29412	1	5	5	2	13	6.5	13	19	1.46154	8	23	2.875	Carbamidomethylation	163810	WD repeat-containing protein 7 OS=Homo sapiens OX=9606 GN=WDR7 PE=1 SV=2
1056	TRUE	Q15758|AAAT_HUMAN	227.856	10	9	15	19	1.26667	20	48	2.4		3	3	3	63	21	21	25	1.19048	17	40	2.35294	Carbamidomethylation	56598.3	Neutral amino acid transporter B(0) OS=Homo sapiens OX=9606 GN=SLC1A5 PE=1 SV=2
907	TRUE	P06702|S10A9_HUMAN	242.428	7	7	45	57	1.26667	79	87	1.10127	62	73	1.17742	115	56	0.486957	32	95	2.96875	44	90	2.04545	Oxidation (M)	13242	Protein S100-A9 OS=Homo sapiens OX=9606 GN=S100A9 PE=1 SV=1
669	TRUE	Q12768|WASC5_HUMAN	266.844	19	19	45	57	1.26667	49	60	1.22449	4	10	2.5	1	10	10	43	44	1.02326	22	40	1.81818	Carbamidomethylation	134286	WASH complex subunit 5 OS=Homo sapiens OX=9606 GN=WASHC5 PE=1 SV=1
2077	TRUE	P13498|CY24A_HUMAN	146.921	5	5	15	19	1.26667	18	48	2.66667	3	11	3.66667	6	41	6.83333	2	3	1.5	6	10	1.66667		21012.5	Cytochrome b-245 light chain OS=Homo sapiens OX=9606 GN=CYBA PE=1 SV=3
3474	TRUE	Q9NWV8|BABA1_HUMAN	57.3374	1	1													2			1	2	2		36560	BRISC and BRCA1-A complex member 1 OS=Homo sapiens OX=9606 GN=BABAM1 PE=1 SV=1
992	TRUE	P46734|MP2K3_HUMAN	233.293	9	9	30	38	1.26667	24	33	1.375	40	22	0.55	12	29	2.41667	33	45	1.36364	25	39	1.56	Carbamidomethylation	39318.4	Dual specificity mitogen-activated protein kinase kinase 3 OS=Homo sapiens OX=9606 GN=MAP2K3 PE=1 SV=2
1776	TRUE	P13693|TCTP_HUMAN	166.437	3	3	15	19	1.26667	16	15	0.9375	15	16	1.06667	7	17	2.42857	8	13	1.625	9	12	1.33333	Oxidation (M); Carbamidomethylation	19595.3	Translationally-controlled tumor protein OS=Homo sapiens OX=9606 GN=TPT1 PE=1 SV=1
1631	TRUE	P05413|FABPH_HUMAN	178.29	4	4	15	19	1.26667	11	6	0.545455	18	15	0.833333	9	5	0.555556	19	16	0.842105	17	19	1.11765	Carbamidomethylation	14858	Fatty acid-binding protein, heart OS=Homo sapiens OX=9606 GN=FABP3 PE=1 SV=4
1307	TRUE	O94905|ERLN2_HUMAN	204.492	8	6	15	19	1.26667	27	17	0.62963	31	23	0.741935	24	25	1.04167	30	30	1	27	28	1.03704	Oxidation (M)	37839.5	Erlin-2 OS=Homo sapiens OX=9606 GN=ERLIN2 PE=1 SV=1
143	TRUE	P42858|HD_HUMAN	372.189	51	51	139	176	1.26619	148	192	1.2973	11	8	0.727273	10	27	2.7	94	108	1.14894	61	110	1.80328	Carbamidomethylation	347603	Huntingtin OS=Homo sapiens OX=9606 GN=HTT PE=1 SV=2
1099	TRUE	P36543|VATE1_HUMAN	223.273	7	7	19	24	1.26316	20	29	1.45	31	31	1	37	29	0.783784	30	35	1.16667	40	31	0.775	Oxidation (M)	26145.3	V-type proton ATPase subunit E 1 OS=Homo sapiens OX=9606 GN=ATP6V1E1 PE=1 SV=1
710	TRUE	Q9UKK3|PARP4_HUMAN	261.34	22	22	46	58	1.26087	48	86	1.79167				1	5	5	27	35	1.2963	28	47	1.67857	Carbamidomethylation	192595	Protein mono-ADP-ribosyltransferase PARP4 OS=Homo sapiens OX=9606 GN=PARP4 PE=1 SV=3
737	TRUE	P20020|AT2B1_HUMAN	258.601	14	6	50	63	1.26	40	74	1.85	6	11	1.83333	8	23	2.875	56	49	0.875	43	53	1.23256	Carbamidomethylation	134685	Plasma membrane calcium-transporting ATPase 1 OS=Homo sapiens OX=9606 GN=ATP2B1 PE=1 SV=4
785	TRUE	Q5JSL3|DOC11_HUMAN	254.281	20	20	27	34	1.25926	46	65	1.41304	1				5	5	12	16	1.33333	7	18	2.57143	Carbamidomethylation	237671	Dedicator of cytokinesis protein 11 OS=Homo sapiens OX=9606 GN=DOCK11 PE=1 SV=2
723	TRUE	P34897|GLYM_HUMAN	259.765	15	15	27	34	1.25926	41	52	1.26829	8	4	0.5	11	15	1.36364	37	22	0.594595	32	44	1.375	Carbamidomethylation	55993	Serine hydroxymethyltransferase, mitochondrial OS=Homo sapiens OX=9606 GN=SHMT2 PE=1 SV=3
840	TRUE	P46977|STT3A_HUMAN	249.241	10	10	27	34	1.25926	46	52	1.13043	11	10	0.909091	13	8	0.615385	26	37	1.42308	30	37	1.23333	Carbamidomethylation; Oxidation (M)	80529.6	Dolichyl-diphosphooligosaccharide--protein glycosyltransferase subunit STT3A OS=Homo sapiens OX=9606 GN=STT3A PE=1 SV=2
964	TRUE	P62750|RL23A_HUMAN	236.243	9	9	62	78	1.25806	69	65	0.942029	23	45	1.95652	40	46	1.15	37	36	0.972973	27	25	0.925926	Oxidation (M)	17695.1	60S ribosomal protein L23a OS=Homo sapiens OX=9606 GN=RPL23A PE=1 SV=1
875	TRUE	Q14289|FAK2_HUMAN	245.411	20	20	35	44	1.25714	45	64	1.42222	5	4	0.8		13	13	44	41	0.931818	24	39	1.625	Carbamidomethylation	115875	Protein-tyrosine kinase 2-beta OS=Homo sapiens OX=9606 GN=PTK2B PE=1 SV=2
95	TRUE	P49588|SYAC_HUMAN	393.939	35	35	152	191	1.25658	170	304	1.78824	29	48	1.65517	27	342	12.6667	67	100	1.49254	87	266	3.05747	Carbamidomethylation; Oxidation (M)	106810	Alanine--tRNA ligase, cytoplasmic OS=Homo sapiens OX=9606 GN=AARS1 PE=1 SV=2
1194	TRUE	P42229|STA5A_HUMAN	215.086	15	3	24	30	1.25	42	74	1.7619	1	3	3	8	6	0.75	8	14	1.75	4	22	5.5		90647	Signal transducer and activator of transcription 5A OS=Homo sapiens OX=9606 GN=STAT5A PE=1 SV=1
889	FALSE	Q9Y6R0|NUMBL_HUMAN	78.2507	2	2	4	5	1.25		6	6					3	3	2	2	1		5	5		64891.4	Numb-like protein OS=Homo sapiens OX=9606 GN=NUMBL PE=1 SV=1
2845	TRUE	Q15003|CND2_HUMAN	95.476	2	2	4	5	1.25		2	2							2	7	3.5		3	3		82563.2	Condensin complex subunit 2 OS=Homo sapiens OX=9606 GN=NCAPH PE=1 SV=3
1170	TRUE	P17252|KPCA_HUMAN	216.876	10	5	36	45	1.25	27	34	1.25926	12	5	0.416667	1	17	17	20	48	2.4	21	50	2.38095	Carbamidomethylation; Oxidation (M)	76749.9	Protein kinase C alpha type OS=Homo sapiens OX=9606 GN=PRKCA PE=1 SV=4
2663	TRUE	Q92542|NICA_HUMAN	106.892	2	2	4	5	1.25	2	13	6.5	1						4	11	2.75	6	14	2.33333		78410.9	Nicastrin OS=Homo sapiens OX=9606 GN=NCSTN PE=1 SV=2
1745	TRUE	P55039|DRG2_HUMAN	168.895	5	5	4	5	1.25	10	8	0.8		1	1		3	3	4	3	0.75	2	4	2	Carbamidomethylation	40746.4	Developmentally-regulated GTP-binding protein 2 OS=Homo sapiens OX=9606 GN=DRG2 PE=1 SV=1
492	TRUE	Q15057|ACAP2_HUMAN	292.751	19	19	32	40	1.25	23	81	3.52174	16	24	1.5	23	21	0.913043	39	46	1.17949	21	38	1.80952	Carbamidomethylation	88028.6	Arf-GAP with coiled-coil, ANK repeat and PH domain-containing protein 2 OS=Homo sapiens OX=9606 GN=ACAP2 PE=1 SV=3
1381	TRUE	P50213|IDH3A_HUMAN	199.471	8	8	16	20	1.25	21	28	1.33333	12	19	1.58333	6	10	1.66667	9	17	1.88889	9	16	1.77778	Carbamidomethylation	39591.7	Isocitrate dehydrogenase [NAD] subunit alpha, mitochondrial OS=Homo sapiens OX=9606 GN=IDH3A PE=1 SV=1
2237	TRUE	Q969X1|LFG3_HUMAN	136.933	3	3	4	5	1.25	3	6	2	5	7	1.4	8	5	0.625	3	7	2.33333	4	7	1.75	Oxidation (M)	34607.4	Protein lifeguard 3 OS=Homo sapiens OX=9606 GN=TMBIM1 PE=1 SV=2
832	TRUE	Q13283|G3BP1_HUMAN	249.596	9	9	12	15	1.25	11	29	2.63636	7	12	1.71429	5	30	6	19	22	1.15789	17	26	1.52941		52164.2	Ras GTPase-activating protein-binding protein 1 OS=Homo sapiens OX=9606 GN=G3BP1 PE=1 SV=1
550	TRUE	O95678|K2C75_HUMAN	283.341	17	1	12	53	4.41667	136	13	0.0955882	18	15	0.833333	17	26	1.52941	45	36	0.8	71	135	1.90141		59560.4	Keratin, type II cytoskeletal 75 OS=Homo sapiens OX=9606 GN=KRT75 PE=1 SV=2
697	TRUE	P28062|PSB8_HUMAN	262.749	13	13	24	30	1.25	46	56	1.21739	27	27	1	27	64	2.37037	18	18	1	19	27	1.42105	Oxidation (M); Carbamidomethylation	30354.3	Proteasome subunit beta type-8 OS=Homo sapiens OX=9606 GN=PSMB8 PE=1 SV=3
755	TRUE	P63241|IF5A1_HUMAN	256.819	9	9	24	30	1.25	29	32	1.10345	30	27	0.9	11	28	2.54545	13	12	0.923077	17	24	1.41176	Carbamidomethylation; Oxidation (M)	16832.2	Eukaryotic translation initiation factor 5A-1 OS=Homo sapiens OX=9606 GN=EIF5A PE=1 SV=2
1706	TRUE	Q9UHB6|LIMA1_HUMAN	172.192	6	6	28	35	1.25	11	11	1	2	2	1				8	14	1.75	9	11	1.22222	Carbamidomethylation	85225.6	LIM domain and actin-binding protein 1 OS=Homo sapiens OX=9606 GN=LIMA1 PE=1 SV=1
2034	TRUE	Q9Y3U8|RL36_HUMAN	149.928	4	4	16	20	1.25	19	14	0.736842	11	5	0.454545	7	16	2.28571	10	8	0.8	10	12	1.2	Oxidation (M); Carbamidomethylation	12253.7	60S ribosomal protein L36 OS=Homo sapiens OX=9606 GN=RPL36 PE=1 SV=3
885	TRUE	P62241|RS8_HUMAN	244.469	10	10	72	90	1.25	98	66	0.673469	62	52	0.83871	58	52	0.896552	53	54	1.01887	46	52	1.13043	Carbamidomethylation	24205.2	40S ribosomal protein S8 OS=Homo sapiens OX=9606 GN=RPS8 PE=1 SV=2
778	TRUE	P60891|PRPS1_HUMAN	255.025	10	3	48	60	1.25	63	50	0.793651	54	51	0.944444	5	72	14.4	39	46	1.17949	26	29	1.11538	Carbamidomethylation	34834.2	Ribose-phosphate pyrophosphokinase 1 OS=Homo sapiens OX=9606 GN=PRPS1 PE=1 SV=2
1702	TRUE	O43583|DENR_HUMAN	172.361	4	4	4	5	1.25	11	10	0.909091	15			7	19	2.71429	34	24	0.705882	20	22	1.1	Carbamidomethylation	22092	Density-regulated protein OS=Homo sapiens OX=9606 GN=DENR PE=1 SV=2
1943	TRUE	P40616|ARL1_HUMAN	156.107	5	5	4	5	1.25	12	9	0.75	1				1	1	11	9	0.818182	11	12	1.09091		20417.5	ADP-ribosylation factor-like protein 1 OS=Homo sapiens OX=9606 GN=ARL1 PE=1 SV=1
1403	TRUE	Q15907|RB11B_HUMAN	197.723	8	8	36	45	1.25	42	38	0.904762	17	12	0.705882	30	22	0.733333	25	23	0.92	28	29	1.03571		24488.5	Ras-related protein Rab-11B OS=Homo sapiens OX=9606 GN=RAB11B PE=1 SV=4
323	TRUE	O00754|MA2B1_HUMAN	322.062	25	25	28	35	1.25	27	86	3.18519	31	40	1.29032	28	33	1.17857	58	79	1.36207	67	68	1.01493	Carbamidomethylation	113744	Lysosomal alpha-mannosidase OS=Homo sapiens OX=9606 GN=MAN2B1 PE=1 SV=3
1058	TRUE	P53597|SUCA_HUMAN	227.498	6	6	16	20	1.25	19	14	0.736842	23	25	1.08696	3	22	7.33333	31	24	0.774194	25	25	1	Carbamidomethylation	36249.7	Succinate--CoA ligase [ADP/GDP-forming] subunit alpha, mitochondrial OS=Homo sapiens OX=9606 GN=SUCLG1 PE=1 SV=4
2386	FALSE	A6NHG4|DDTL_HUMAN	97.4565	2	2	4	5	1.25	6	7	1.16667	6	7	1.16667	6	5	0.833333	5	7	1.4	5	4	0.8		14195.3	D-dopachrome decarboxylase-like protein OS=Homo sapiens OX=9606 GN=DDTL PE=2 SV=1
2656	TRUE	P21730|C5AR1_HUMAN	107.267	2	2	16	20	1.25	18	20	1.11111	15	21	1.4	1	15	15	5	8	1.6	10	7	0.7	Carbamidomethylation	39335.6	C5a anaphylatoxin chemotactic receptor 1 OS=Homo sapiens OX=9606 GN=C5AR1 PE=1 SV=2
2730	TRUE	P05783|K1C18_HUMAN	101.938	2	2	4	5	1.25										3							48057.8	Keratin, type I cytoskeletal 18 OS=Homo sapiens OX=9606 GN=KRT18 PE=1 SV=2
453	TRUE	Q9H4G0|E41L1_HUMAN	297.476	24	22	69	86	1.24638	42	89	2.11905	19	29	1.52632	2	12	6	92	121	1.31522	60	98	1.63333	Carbamidomethylation; Oxidation (M)	98502.9	Band 4.1-like protein 1 OS=Homo sapiens OX=9606 GN=EPB41L1 PE=1 SV=2
154	TRUE	P32455|GBP1_HUMAN	367.494	31	21	53	66	1.24528	222	209	0.941441	38	26	0.684211	200	209	1.045	41	34	0.829268	152	167	1.09868	Oxidation (M); Carbamidomethylation	67930.7	Guanylate-binding protein 1 OS=Homo sapiens OX=9606 GN=GBP1 PE=1 SV=2
527	TRUE	P39656|OST48_HUMAN	287.148	15	15	49	61	1.2449	78	74	0.948718	45	43	0.955556	32	40	1.25	44	59	1.34091	60	78	1.3	Carbamidomethylation	50800.8	Dolichyl-diphosphooligosaccharide--protein glycosyltransferase 48 kDa subunit OS=Homo sapiens OX=9606 GN=DDOST PE=1 SV=4
812	TRUE	P05120|PAI2_HUMAN	251.778	13	13	37	46	1.24324	48	65	1.35417	24	27	1.125	50	40	0.8	17	12	0.705882	20	31	1.55	Carbamidomethylation	46596.2	Plasminogen activator inhibitor 2 OS=Homo sapiens OX=9606 GN=SERPINB2 PE=1 SV=2
410	TRUE	Q9Y6K5|OAS3_HUMAN	303.375	27	27	37	46	1.24324	102	93	0.911765	1	1	1	2	6	3	54	35	0.648148	50	50	1	Carbamidomethylation	121170	2'-5'-oligoadenylate synthase 3 OS=Homo sapiens OX=9606 GN=OAS3 PE=1 SV=3
652	TRUE	Q8WVM8|SCFD1_HUMAN	269.517	14	14	33	41	1.24242	31	34	1.09677	13	9	0.692308	9	11	1.22222	60	35	0.583333	49	48	0.979592	Carbamidomethylation	72379.8	Sec1 family domain-containing protein 1 OS=Homo sapiens OX=9606 GN=SCFD1 PE=1 SV=4
530	TRUE	Q16666|IF16_HUMAN	286.781	19	19	29	36	1.24138	89	100	1.1236	28	24	0.857143	87	39	0.448276	24	28	1.16667	42	47	1.11905	Oxidation (M); Carbamidomethylation	88255.6	Gamma-interferon-inducible protein 16 OS=Homo sapiens OX=9606 GN=IFI16 PE=1 SV=3
726	TRUE	P04062|GLCM_HUMAN	259.463	17	17	25	31	1.24	12	42	3.5	17	13	0.764706	4	18	4.5	21	37	1.7619	24	53	2.20833	Carbamidomethylation; Oxidation (M)	59716.3	Lysosomal acid glucosylceramidase OS=Homo sapiens OX=9606 GN=GBA PE=1 SV=3
1632	TRUE	Q9NZ01|TECR_HUMAN	178.264	7	7	21	26	1.2381	18	23	1.27778	29	16	0.551724	13	28	2.15385	26	30	1.15385	23	31	1.34783		36034.4	Very-long-chain enoyl-CoA reductase OS=Homo sapiens OX=9606 GN=TECR PE=1 SV=1
1050	TRUE	Q9NQT8|KI13B_HUMAN	228.242	13	11	21	26	1.2381	31	42	1.35484					1	1	18	14	0.777778	5	6	1.2		202789	Kinesin-like protein KIF13B OS=Homo sapiens OX=9606 GN=KIF13B PE=1 SV=2
1275	TRUE	Q8TC12|RDH11_HUMAN	207.373	8	8	21	26	1.2381	35	43	1.22857	31	46	1.48387	27	39	1.44444	21	26	1.2381	39	29	0.74359	Carbamidomethylation; Oxidation (M)	35386.2	Retinol dehydrogenase 11 OS=Homo sapiens OX=9606 GN=RDH11 PE=1 SV=2
1692	TRUE	Q96LJ7|DHRS1_HUMAN	173.294	6	6	17	21	1.23529	10	11	1.1	1			2	1	0.5	11	17	1.54545	1	8	8	Carbamidomethylation	33909	Dehydrogenase/reductase SDR family member 1 OS=Homo sapiens OX=9606 GN=DHRS1 PE=1 SV=1
1015	TRUE	Q8IY34|S15A3_HUMAN	230.727	9	9	17	21	1.23529	27	40	1.48148		1	1		24	24		22	22	11	24	2.18182	Carbamidomethylation; Oxidation (M)	63559.5	Solute carrier family 15 member 3 OS=Homo sapiens OX=9606 GN=SLC15A3 PE=1 SV=2
1098	TRUE	Q9UNF0|PACN2_HUMAN	223.319	9	9	34	42	1.23529	38	44	1.15789	39	35	0.897436	34	33	0.970588	27	44	1.62963	42	44	1.04762	Carbamidomethylation	55738.6	Protein kinase C and casein kinase substrate in neurons protein 2 OS=Homo sapiens OX=9606 GN=PACSIN2 PE=1 SV=2
757	TRUE	O60749|SNX2_HUMAN	256.675	14	12	34	42	1.23529	31	40	1.29032	43	42	0.976744	45	36	0.8	41	32	0.780488	36	33	0.916667		58471.1	Sorting nexin-2 OS=Homo sapiens OX=9606 GN=SNX2 PE=1 SV=2
986	TRUE	Q66K14|TBC9B_HUMAN	234.175	12	11	34	42	1.23529	26	41	1.57692	5	3	0.6		2	2	24	28	1.16667	35	19	0.542857	Carbamidomethylation	140525	TBC1 domain family member 9B OS=Homo sapiens OX=9606 GN=TBC1D9B PE=1 SV=3
2242	TRUE	P00441|SODC_HUMAN	136.293	3	3	30	37	1.23333	16	19	1.1875													Carbamidomethylation	15935.7	Superoxide dismutase [Cu-Zn] OS=Homo sapiens OX=9606 GN=SOD1 PE=1 SV=2
98	TRUE	Q08211|DHX9_HUMAN	388.683	37	37	212	261	1.23113	229	272	1.18777	117	122	1.04274	73	138	1.89041	159	162	1.01887	132	175	1.32576	Carbamidomethylation; Oxidation (M)	140958	ATP-dependent RNA helicase A OS=Homo sapiens OX=9606 GN=DHX9 PE=1 SV=4
1147	TRUE	P06132|DCUP_HUMAN	219.608	7	7	26	32	1.23077	32	22	0.6875	3	3	1				19	18	0.947368	9	23	2.55556	Carbamidomethylation	40786.9	Uroporphyrinogen decarboxylase OS=Homo sapiens OX=9606 GN=UROD PE=1 SV=2
1037	TRUE	Q15459|SF3A1_HUMAN	228.92	13	13	26	32	1.23077	39	32	0.820513	4	5	1.25	2	2	1	24	18	0.75	17	26	1.52941		88886.2	Splicing factor 3A subunit 1 OS=Homo sapiens OX=9606 GN=SF3A1 PE=1 SV=1
201	TRUE	P04899|GNAI2_HUMAN	353.008	22	16	130	160	1.23077	157	235	1.49682	147	127	0.863946	62	143	2.30645	148	152	1.02703	130	174	1.33846	Oxidation (M); Carbamidomethylation	40450.9	Guanine nucleotide-binding protein G(i) subunit alpha-2 OS=Homo sapiens OX=9606 GN=GNAI2 PE=1 SV=3
714	TRUE	P00387|NB5R3_HUMAN	260.901	11	11	52	64	1.23077	53	42	0.792453	10	20	2	8	16	2	43	36	0.837209	32	42	1.3125	Oxidation (M); Carbamidomethylation	34234.8	NADH-cytochrome b5 reductase 3 OS=Homo sapiens OX=9606 GN=CYB5R3 PE=1 SV=3
438	TRUE	P09110|THIK_HUMAN	299.402	14	14	61	75	1.22951	81	77	0.950617	58	38	0.655172	13	40	3.07692	79	76	0.962025	83	77	0.927711	Carbamidomethylation	44292	3-ketoacyl-CoA thiolase, peroxisomal OS=Homo sapiens OX=9606 GN=ACAA1 PE=1 SV=2
1086	TRUE	P13646|K1C13_HUMAN	224.207	12	1	21	29	1.38095	78	9	0.115385	30	27	0.9	33	30	0.909091	28	17	0.607143	36	66	1.83333		49588.2	Keratin, type I cytoskeletal 13 OS=Homo sapiens OX=9606 GN=KRT13 PE=1 SV=4
457	TRUE	P39023|RL3_HUMAN	296.918	14	14	96	118	1.22917	104	111	1.06731	82	77	0.939024	44	60	1.36364	58	68	1.17241	74	82	1.10811	Oxidation (M); Carbamidomethylation	46108.9	60S ribosomal protein L3 OS=Homo sapiens OX=9606 GN=RPL3 PE=1 SV=2
906	TRUE	P23396|RS3_HUMAN	242.491	11	11	48	59	1.22917	49	55	1.12245	64	55	0.859375	34	50	1.47059	53	48	0.90566	51	45	0.882353	Oxidation (M); Carbamidomethylation	26688.3	40S ribosomal protein S3 OS=Homo sapiens OX=9606 GN=RPS3 PE=1 SV=2
177	TRUE	Q02318|CP27A_HUMAN	357.919	33	33	123	151	1.22764	136	177	1.30147	135	127	0.940741	83	114	1.37349	159	170	1.06918	125	158	1.264	Oxidation (M); Carbamidomethylation	60234.8	Sterol 26-hydroxylase, mitochondrial OS=Homo sapiens OX=9606 GN=CYP27A1 PE=1 SV=1
1441	FALSE	Q12756|KIF1A_HUMAN	119.443	5	3	9	11	1.22222	3	17	5.66667							4	7	1.75		2	2		191064	Kinesin-like protein KIF1A OS=Homo sapiens OX=9606 GN=KIF1A PE=1 SV=2
1176	TRUE	Q9HDC9|APMAP_HUMAN	216.315	11	11	9	11	1.22222	18	33	1.83333	14	13	0.928571	11	29	2.63636	8	18	2.25	11	16	1.45455		46480.4	Adipocyte plasma membrane-associated protein OS=Homo sapiens OX=9606 GN=APMAP PE=1 SV=2
1177	TRUE	P16070|CD44_HUMAN	216.018	6	6	27	33	1.22222	23	22	0.956522	34	17	0.5	26	28	1.07692	27	14	0.518519	19	21	1.10526	Carbamidomethylation; Oxidation (M)	81537.6	CD44 antigen OS=Homo sapiens OX=9606 GN=CD44 PE=1 SV=3
1416	TRUE	Q9H845|ACAD9_HUMAN	197.149	10	10	9	11	1.22222	18	14	0.777778	11	8	0.727273	8	5	0.625	15	9	0.6	13	13	1	Carbamidomethylation	68760.3	Complex I assembly factor ACAD9, mitochondrial OS=Homo sapiens OX=9606 GN=ACAD9 PE=1 SV=1
1166	TRUE	O76003|GLRX3_HUMAN	217.086	9	9	18	22	1.22222	25	22	0.88	37	25	0.675676	3	22	7.33333	26	23	0.884615	22	17	0.772727	Carbamidomethylation	37432	Glutaredoxin-3 OS=Homo sapiens OX=9606 GN=GLRX3 PE=1 SV=2
1898	TRUE	P09661|RU2A_HUMAN	159.311	5	5	9	11	1.22222	8	9	1.125	4	1	0.25	3	2	0.666667	6	10	1.66667	8	6	0.75		28415.6	U2 small nuclear ribonucleoprotein A' OS=Homo sapiens OX=9606 GN=SNRPA1 PE=1 SV=2
511	TRUE	Q9NQW7|XPP1_HUMAN	290.254	21	21	41	50	1.21951	48	93	1.9375	21	30	1.42857	10	61	6.1	34	43	1.26471	31	44	1.41935	Carbamidomethylation	69917.8	Xaa-Pro aminopeptidase 1 OS=Homo sapiens OX=9606 GN=XPNPEP1 PE=1 SV=3
1864	TRUE	Q96S97|MYADM_HUMAN	161.166	4	4	32	39	1.21875	28	40	1.42857	30	32	1.06667	7	37	5.28571	27	63	2.33333	26	52	2	Carbamidomethylation; Oxidation (M)	35273.6	Myeloid-associated differentiation marker OS=Homo sapiens OX=9606 GN=MYADM PE=1 SV=2
379	TRUE	Q06210|GFPT1_HUMAN	308.351	22	22	46	56	1.21739	35	61	1.74286	38	39	1.02632	29	35	1.2069	38	43	1.13158	52	76	1.46154	Carbamidomethylation; Oxidation (M)	78806.4	Glutamine--fructose-6-phosphate aminotransferase [isomerizing] 1 OS=Homo sapiens OX=9606 GN=GFPT1 PE=1 SV=3
1075	TRUE	O95747|OXSR1_HUMAN	226.035	9	9	23	28	1.21739	20	32	1.6	11	12	1.09091	14	23	1.64286	25	30	1.2	32	36	1.125		58022.2	Serine/threonine-protein kinase OSR1 OS=Homo sapiens OX=9606 GN=OXSR1 PE=1 SV=1
1082	TRUE	Q96I99|SUCB2_HUMAN	225.317	12	12	23	28	1.21739	22	27	1.22727	15	8	0.533333	10	20	2	29	29	1	30	33	1.1	Carbamidomethylation; Oxidation (M)	46510.6	Succinate--CoA ligase [GDP-forming] subunit beta, mitochondrial OS=Homo sapiens OX=9606 GN=SUCLG2 PE=1 SV=2
784	TRUE	P24539|AT5F1_HUMAN	254.325	10	10	92	112	1.21739	87	108	1.24138	69	37	0.536232	72	41	0.569444	42	39	0.928571	36	33	0.916667	Oxidation (M)	28908.6	ATP synthase F(0) complex subunit B1, mitochondrial OS=Homo sapiens OX=9606 GN=ATP5PB PE=1 SV=2
521	TRUE	P08754|GNAI3_HUMAN	288.795	12	6	93	113	1.21505	107	177	1.65421	76	74	0.973684	66	75	1.13636	59	69	1.16949	48	94	1.95833	Carbamidomethylation; Oxidation (M)	40532.2	Guanine nucleotide-binding protein G(i) subunit alpha OS=Homo sapiens OX=9606 GN=GNAI3 PE=1 SV=3
1544	TRUE	P51153|RAB13_HUMAN	186.144	6	5	28	34	1.21429	30	29	0.966667	25	12	0.48	16	15	0.9375	11	13	1.18182	17	8	0.470588	Oxidation (M)	22774.1	Ras-related protein Rab-13 OS=Homo sapiens OX=9606 GN=RAB13 PE=1 SV=1
1030	TRUE	O75947|ATP5H_HUMAN	229.583	9	9	47	57	1.21277	51	51	1	72	48	0.666667	74	43	0.581081	63	55	0.873016	64	54	0.84375	Carbamidomethylation	18491.2	ATP synthase subunit d, mitochondrial OS=Homo sapiens OX=9606 GN=ATP5PD PE=1 SV=3
534	TRUE	O96008|TOM40_HUMAN	285.957	14	14	52	63	1.21154	47	68	1.44681	17	16	0.941176	16	18	1.125	35	39	1.11429	39	40	1.02564	Oxidation (M); Carbamidomethylation	37893.1	Mitochondrial import receptor subunit TOM40 homolog OS=Homo sapiens OX=9606 GN=TOMM40 PE=1 SV=1
194	TRUE	Q99460|PSMD1_HUMAN	353.226	34	34	152	184	1.21053	151	183	1.21192	50	45	0.9	42	45	1.07143	93	101	1.08602	71	94	1.32394	Oxidation (M); Carbamidomethylation	105836	26S proteasome non-ATPase regulatory subunit 1 OS=Homo sapiens OX=9606 GN=PSMD1 PE=1 SV=2
1418	TRUE	P62910|RL32_HUMAN	197.096	5	5	24	29	1.20833	48	21	0.4375	23	19	0.826087		17	17	31	19	0.612903	21	34	1.61905	Oxidation (M); Carbamidomethylation	15859.8	60S ribosomal protein L32 OS=Homo sapiens OX=9606 GN=RPL32 PE=1 SV=2
1123	TRUE	O75116|ROCK2_HUMAN	221.466	15	10	24	29	1.20833	18	20	1.11111							13	14	1.07692	13	8	0.615385	Carbamidomethylation	160900	Rho-associated protein kinase 2 OS=Homo sapiens OX=9606 GN=ROCK2 PE=1 SV=4
2372	TRUE	P17081|RHOQ_HUMAN	125.212	3	1	22	24	1.09091	15	27	1.8	20	7	0.35		15	15	7	7	1	5	9	1.8	Carbamidomethylation	22659.5	Rho-related GTP-binding protein RhoQ OS=Homo sapiens OX=9606 GN=RHOQ PE=1 SV=2
653	TRUE	O60443|GSDME_HUMAN	269.126	15	15	58	70	1.2069	49	75	1.53061	71	62	0.873239	21	52	2.47619	60	51	0.85	50	58	1.16	Carbamidomethylation	54554.9	Gasdermin-E OS=Homo sapiens OX=9606 GN=GSDME PE=1 SV=2
1464	TRUE	P31937|3HIDH_HUMAN	192.963	5	5	29	35	1.2069	27	57	2.11111	29	26	0.896552		31	31	34	34	1	38	41	1.07895		35328.9	3-hydroxyisobutyrate dehydrogenase, mitochondrial OS=Homo sapiens OX=9606 GN=HIBADH PE=1 SV=2
2593	TRUE	P60468|SC61B_HUMAN	110.859	2	2	29	35	1.2069	26	14	0.538462	20	14	0.7	23	15	0.652174	15	11	0.733333	20	11	0.55		9974.45	Protein transport protein Sec61 subunit beta OS=Homo sapiens OX=9606 GN=SEC61B PE=1 SV=2
2006	TRUE	Q8N8V2|GBP7_HUMAN	151.266	3	1	7	5	0.714286	21	18	0.857143		1	1	42	45	1.07143				5	9	1.8		72513.2	Guanylate-binding protein 7 OS=Homo sapiens OX=9606 GN=GBP7 PE=1 SV=2
225	TRUE	P31150|GDIA_HUMAN	344.537	24	11	151	182	1.2053	190	210	1.10526	169	122	0.721893	95	158	1.66316	193	200	1.03627	189	208	1.10053	Oxidation (M); Carbamidomethylation	50582.7	Rab GDP dissociation inhibitor alpha OS=Homo sapiens OX=9606 GN=GDI1 PE=1 SV=2
1379	TRUE	Q13155|AIMP2_HUMAN	199.531	6	6	15	18	1.2	28	31	1.10714	8			2	3	1.5	18	18	1		28	28	Carbamidomethylation	35348.8	Aminoacyl tRNA synthase complex-interacting multifunctional protein 2 OS=Homo sapiens OX=9606 GN=AIMP2 PE=1 SV=2
2303	TRUE	Q15276|RABE1_HUMAN	131.381	4	4	5	6	1.2	2	1	0.5							1	1	1		4	4		99290.4	Rab GTPase-binding effector protein 1 OS=Homo sapiens OX=9606 GN=RABEP1 PE=1 SV=2
44	TRUE	Q07954|LRP1_HUMAN	429.061	69	69	160	192	1.2	178	289	1.6236		7	7	2	122	61	33	111	3.36364	32	121	3.78125	Carbamidomethylation	504606	Prolow-density lipoprotein receptor-related protein 1 OS=Homo sapiens OX=9606 GN=LRP1 PE=1 SV=2
2008	TRUE	Q13057|COASY_HUMAN	151.131	5	5	5	6	1.2	5	5	1	1						7	9	1.28571	3	7	2.33333	Carbamidomethylation	62328.8	Bifunctional coenzyme A synthase OS=Homo sapiens OX=9606 GN=COASY PE=1 SV=4
1559	TRUE	P13073|COX41_HUMAN	184.806	5	5	5	6	1.2	4	11	2.75	15	13	0.866667	13	26	2	6	15	2.5	10	21	2.1	Oxidation (M)	19576.7	Cytochrome c oxidase subunit 4 isoform 1, mitochondrial OS=Homo sapiens OX=9606 GN=COX4I1 PE=1 SV=1
3131	TRUE	Q9NXC5|MIO_HUMAN	77.5864	2	2	5	6	1.2	1	3	3					1	1	1				2	2		98584.4	GATOR complex protein MIOS OS=Homo sapiens OX=9606 GN=MIOS PE=1 SV=2
752	TRUE	Q12802|AKP13_HUMAN	257.266	18	18	10	12	1.2	22	27	1.22727		1	1	1	10	10	8	12	1.5	16	31	1.9375	Carbamidomethylation	307550	A-kinase anchor protein 13 OS=Homo sapiens OX=9606 GN=AKAP13 PE=1 SV=2
1910	TRUE	Q14157|UBP2L_HUMAN	158.633	7	7	15	18	1.2	18				1	1	2			8	32	4	9	16	1.77778		114534	Ubiquitin-associated protein 2-like OS=Homo sapiens OX=9606 GN=UBAP2L PE=1 SV=2
2200	TRUE	Q9NVE7|PANK4_HUMAN	139.205	3	3	5	6	1.2	11	10	0.909091	1			1			10	14	1.4	6	10	1.66667	Carbamidomethylation	85990.9	4'-phosphopantetheine phosphatase OS=Homo sapiens OX=9606 GN=PANK4 PE=1 SV=1
2247	TRUE	Q92783|STAM1_HUMAN	135.958	4	3	5	6	1.2	7	13	1.85714					1	1	5	5	1	5	7	1.4		59179.6	Signal transducing adapter molecule 1 OS=Homo sapiens OX=9606 GN=STAM PE=1 SV=3
514	TRUE	Q9Y263|PLAP_HUMAN	290.063	18	18	55	66	1.2	69	99	1.43478	18	21	1.16667	4	27	6.75	66	58	0.878788	43	56	1.30233	Carbamidomethylation	87157.1	Phospholipase A-2-activating protein OS=Homo sapiens OX=9606 GN=PLAA PE=1 SV=2
668	FALSE	Q14409|GLPK3_HUMAN	259.913	13	13	10	12	1.2	79	89	1.12658	16	18	1.125	68	79	1.16176	42	16	0.380952	55	68	1.23636	Carbamidomethylation	60597.9	Glycerol kinase 3 OS=Homo sapiens OX=9606 GN=GK3P PE=2 SV=2
2405	TRUE	P43378|PTN9_HUMAN	122.495	4	4	5	6	1.2	3									12	5	0.416667	6	7	1.16667	Carbamidomethylation	68020	Tyrosine-protein phosphatase non-receptor type 9 OS=Homo sapiens OX=9606 GN=PTPN9 PE=1 SV=1
1729	TRUE	P20645|MPRD_HUMAN	170.115	3	3	10	12	1.2	11	22	2	15	10	0.666667	23	11	0.478261	5	11	2.2	13	13	1		30993.3	Cation-dependent mannose-6-phosphate receptor OS=Homo sapiens OX=9606 GN=M6PR PE=1 SV=1
2266	TRUE	Q96Q05|TPPC9_HUMAN	134.582	6	6	5	6	1.2	8	8	1							5	7	1.4	4	4	1	Carbamidomethylation	128530	Trafficking protein particle complex subunit 9 OS=Homo sapiens OX=9606 GN=TRAPPC9 PE=1 SV=2
994	TRUE	Q9Y696|CLIC4_HUMAN	232.967	10	9	20	24	1.2	24	35	1.45833	9	23	2.55556	7	29	4.14286	33	38	1.15152	49	48	0.979592	Carbamidomethylation	28772.1	Chloride intracellular channel protein 4 OS=Homo sapiens OX=9606 GN=CLIC4 PE=1 SV=4
517	FALSE	P60763|RAC3_HUMAN	208.679	6	1	26	16	0.615385	20	40	2	25	47	1.88	25	41	1.64	28	26	0.928571	17	30	1.76471	Carbamidomethylation	21378.9	Ras-related C3 botulinum toxin substrate 3 OS=Homo sapiens OX=9606 GN=RAC3 PE=1 SV=1
451	TRUE	O14773|TPP1_HUMAN	297.798	18	18	71	85	1.19718	66	73	1.10606	81	41	0.506173	54	60	1.11111	43	46	1.06977	46	43	0.934783	Carbamidomethylation	61247.9	Tripeptidyl-peptidase 1 OS=Homo sapiens OX=9606 GN=TPP1 PE=1 SV=2
87	TRUE	P09467|F16P1_HUMAN	397.607	31	30	326	390	1.19632	253	343	1.35573	336	336	1	199	283	1.42211	538	528	0.981413	449	446	0.993318	Carbamidomethylation; Oxidation (M)	36842.5	Fructose-1,6-bisphosphatase 1 OS=Homo sapiens OX=9606 GN=FBP1 PE=1 SV=5
882	TRUE	P62979|RS27A_HUMAN	244.742	7	7	51	61	1.19608	48	79	1.64583	45	35	0.777778	19	79	4.15789	37	127	3.43243	46	130	2.82609	Carbamidomethylation; Oxidation (M)	17964.9	Ubiquitin-40S ribosomal protein S27a OS=Homo sapiens OX=9606 GN=RPS27A PE=1 SV=2
94	TRUE	P41252|SYIC_HUMAN	394.222	47	47	153	183	1.19608	154	227	1.47403	66	79	1.19697	27	87	3.22222	167	193	1.15569	149	239	1.60403	Carbamidomethylation	144498	Isoleucine--tRNA ligase, cytoplasmic OS=Homo sapiens OX=9606 GN=IARS1 PE=1 SV=2
559	TRUE	P23141|EST1_HUMAN	282.306	18	18	46	55	1.19565	56	61	1.08929	9	2	0.222222	16	6	0.375	59	55	0.932203	68	56	0.823529	Carbamidomethylation	62521.1	Liver carboxylesterase 1 OS=Homo sapiens OX=9606 GN=CES1 PE=1 SV=2
783	TRUE	Q8IZ83|A16A1_HUMAN	254.429	11	11	52	62	1.19231	80	89	1.1125	10	7	0.7	11	22	2	37	33	0.891892	55	36	0.654545	Carbamidomethylation	85127.4	Aldehyde dehydrogenase family 16 member A1 OS=Homo sapiens OX=9606 GN=ALDH16A1 PE=1 SV=2
749	TRUE	P23526|SAHH_HUMAN	257.5	13	12	47	56	1.19149	43	57	1.32558	25	19	0.76	18	13	0.722222	30	26	0.866667	21	27	1.28571	Oxidation (M); Carbamidomethylation	47716.1	Adenosylhomocysteinase OS=Homo sapiens OX=9606 GN=AHCY PE=1 SV=4
867	TRUE	Q8N2K0|ABD12_HUMAN	246.696	16	16	47	56	1.19149	60	63	1.05	9	11	1.22222	4	6	1.5	35	33	0.942857	35	25	0.714286	Carbamidomethylation	45096.8	Lysophosphatidylserine lipase ABHD12 OS=Homo sapiens OX=9606 GN=ABHD12 PE=1 SV=2
666	TRUE	P30622|CLIP1_HUMAN	266.987	24	21	21	25	1.19048	42	46	1.09524		1	1	9	6	0.666667	13	20	1.53846	12	34	2.83333	Carbamidomethylation	162246	CAP-Gly domain-containing linker protein 1 OS=Homo sapiens OX=9606 GN=CLIP1 PE=1 SV=2
739	TRUE	P52565|GDIR1_HUMAN	258.481	10	10	63	75	1.19048	69	63	0.913043	82	48	0.585366	64	61	0.953125	68	70	1.02941	66	69	1.04545	Oxidation (M); Carbamidomethylation	23207.1	Rho GDP-dissociation inhibitor 1 OS=Homo sapiens OX=9606 GN=ARHGDIA PE=1 SV=3
275	TRUE	P04844|RPN2_HUMAN	330.053	25	25	95	113	1.18947	103	125	1.21359	66	44	0.666667	44	33	0.75	104	112	1.07692	111	128	1.15315	Carbamidomethylation; Oxidation (M)	69284	Dolichyl-diphosphooligosaccharide--protein glycosyltransferase subunit 2 OS=Homo sapiens OX=9606 GN=RPN2 PE=1 SV=3
1152	TRUE	P51606|RENBP_HUMAN	218.521	9	9	37	44	1.18919	36	44	1.22222	39	53	1.35897	24	43	1.79167	35	28	0.8	17	28	1.64706	Carbamidomethylation	48830.9	N-acylglucosamine 2-epimerase OS=Homo sapiens OX=9606 GN=RENBP PE=1 SV=2
503	FALSE	P07947|YES_HUMAN	119.899	3	1	4	5	1.25	4	12	3		10	10		5	5	10	10	1	4	7	1.75	Carbamidomethylation	60801.2	Tyrosine-protein kinase Yes OS=Homo sapiens OX=9606 GN=YES1 PE=1 SV=3
3321	TRUE	Q9HAB8|PPCS_HUMAN	65.4527	1	1		1	1							1	1	1	1	1	1	4	7	1.75		34005.1	Phosphopantothenate--cysteine ligase OS=Homo sapiens OX=9606 GN=PPCS PE=1 SV=2
1695	TRUE	Q13191|CBLB_HUMAN	172.964	6	5	16	19	1.1875	28	15	0.535714				1	5	5				1	6	6	Carbamidomethylation	109450	E3 ubiquitin-protein ligase CBL-B OS=Homo sapiens OX=9606 GN=CBLB PE=1 SV=2
1302	TRUE	Q9NT62|ATG3_HUMAN	204.915	6	6	16	19	1.1875	24	27	1.125	28	26	0.928571	40	33	0.825	14	15	1.07143	19	24	1.26316		35864.4	Ubiquitin-like-conjugating enzyme ATG3 OS=Homo sapiens OX=9606 GN=ATG3 PE=1 SV=1
1032	TRUE	Q13162|PRDX4_HUMAN	229.442	9	9	16	19	1.1875	21	19	0.904762	27	26	0.962963	21	9	0.428571	31	26	0.83871	38	36	0.947368	Carbamidomethylation	30539.9	Peroxiredoxin-4 OS=Homo sapiens OX=9606 GN=PRDX4 PE=1 SV=1
83	TRUE	P05023|AT1A1_HUMAN	399.878	37	24	247	293	1.18623	198	345	1.74242	201	189	0.940299	149	190	1.27517	292	336	1.15068	231	309	1.33766	Carbamidomethylation; Oxidation (M)	112896	Sodium/potassium-transporting ATPase subunit alpha-1 OS=Homo sapiens OX=9606 GN=ATP1A1 PE=1 SV=1
1853	TRUE	Q00765|REEP5_HUMAN	161.812	4	4	27	32	1.18519	24	18	0.75	2	8	4	6	4	0.666667	2	3	1.5	4	3	0.75	Oxidation (M); Carbamidomethylation	21493.1	Receptor expression-enhancing protein 5 OS=Homo sapiens OX=9606 GN=REEP5 PE=1 SV=3
804	TRUE	Q5XKE5|K2C79_HUMAN	252.332	17	1	12	68	5.66667	216	13	0.0601852	25	15	0.6	20	26	1.3	44	36	0.818182	90	157	1.74444	Oxidation (M); Carbamidomethylation	57835.6	Keratin, type II cytoskeletal 79 OS=Homo sapiens OX=9606 GN=KRT79 PE=1 SV=2
1649	TRUE	Q3ZCQ8|TIM50_HUMAN	176.372	6	6	11	13	1.18182	13	6	0.461538	6			2	1	0.5	25	18	0.72	18	18	1		39646.2	Mitochondrial import inner membrane translocase subunit TIM50 OS=Homo sapiens OX=9606 GN=TIMM50 PE=1 SV=2
1240	TRUE	Q14103|HNRPD_HUMAN	210.071	7	6	45	53	1.17778	49	48	0.979592	43	21	0.488372	39	38	0.974359	34	30	0.882353	28	27	0.964286	Oxidation (M); Carbamidomethylation	38434.2	Heterogeneous nuclear ribonucleoprotein D0 OS=Homo sapiens OX=9606 GN=HNRNPD PE=1 SV=1
909	TRUE	P28066|PSA5_HUMAN	241.677	10	10	34	40	1.17647	40	35	0.875	43	44	1.02326	48	53	1.10417	59	48	0.813559	53	56	1.0566	Carbamidomethylation; Oxidation (M)	26411	Proteasome subunit alpha type-5 OS=Homo sapiens OX=9606 GN=PSMA5 PE=1 SV=3
83	FALSE	P13637|AT1A3_HUMAN	304.803	15	3	125	147	1.176	94	172	1.82979	109	102	0.93578	79	102	1.29114	119	156	1.31092	97	142	1.46392	Carbamidomethylation; Oxidation (M)	111749	Sodium/potassium-transporting ATPase subunit alpha-3 OS=Homo sapiens OX=9606 GN=ATP1A3 PE=1 SV=3
585	TRUE	Q9H269|VPS16_HUMAN	279.473	16	16	57	67	1.17544	42	55	1.30952	12	14	1.16667	20	32	1.6	26	22	0.846154	27	30	1.11111	Carbamidomethylation	94693.7	Vacuolar protein sorting-associated protein 16 homolog OS=Homo sapiens OX=9606 GN=VPS16 PE=1 SV=2
1134	TRUE	Q6PCB7|S27A1_HUMAN	220.653	11	9	23	27	1.17391	22	42	1.90909	2	4	2		10	10	19	23	1.21053	30	27	0.9	Carbamidomethylation	71108.2	Long-chain fatty acid transport protein 1 OS=Homo sapiens OX=9606 GN=SLC27A1 PE=1 SV=1
1115	TRUE	P18621|RL17_HUMAN	222.029	7	7	52	61	1.17308	58	48	0.827586	44	40	0.909091	42	33	0.785714	27	24	0.888889	22	28	1.27273	Oxidation (M); Carbamidomethylation	21397	60S ribosomal protein L17 OS=Homo sapiens OX=9606 GN=RPL17 PE=1 SV=3
423	TRUE	P43405|KSYK_HUMAN	301.855	20	20	58	68	1.17241	53	70	1.32075	21	15	0.714286	34	23	0.676471	54	50	0.925926	44	53	1.20455	Carbamidomethylation	72066.2	Tyrosine-protein kinase SYK OS=Homo sapiens OX=9606 GN=SYK PE=1 SV=1
684	TRUE	O76021|RL1D1_HUMAN	264.581	11	11	58	68	1.17241	58	51	0.87931	32	26	0.8125	7	6	0.857143	38	44	1.15789	43	41	0.953488	Carbamidomethylation; Oxidation (M)	54972.5	Ribosomal L1 domain-containing protein 1 OS=Homo sapiens OX=9606 GN=RSL1D1 PE=1 SV=3
220	TRUE	Q04637|IF4G1_HUMAN	346.27	34	32	105	123	1.17143	85	101	1.18824	41	53	1.29268	15	32	2.13333	102	104	1.01961	72	102	1.41667	Carbamidomethylation; Oxidation (M)	175491	Eukaryotic translation initiation factor 4 gamma 1 OS=Homo sapiens OX=9606 GN=EIF4G1 PE=1 SV=4
205	TRUE	Q02218|ODO1_HUMAN	350.335	29	29	166	194	1.16867	205	207	1.00976	94	73	0.776596	45	72	1.6	186	201	1.08065	146	178	1.21918	Carbamidomethylation; Oxidation (M)	115935	2-oxoglutarate dehydrogenase, mitochondrial OS=Homo sapiens OX=9606 GN=OGDH PE=1 SV=3
171	TRUE	O60488|ACSL4_HUMAN	360.294	35	33	95	111	1.16842	124	162	1.30645	97	108	1.1134	62	127	2.04839	123	145	1.17886	114	154	1.35088	Carbamidomethylation; Oxidation (M)	79188	Long-chain-fatty-acid--CoA ligase 4 OS=Homo sapiens OX=9606 GN=ACSL4 PE=1 SV=2
198	TRUE	P48506|GSH1_HUMAN	353.064	32	32	137	160	1.16788	143	158	1.1049	60	69	1.15	80	88	1.1	80	80	1	87	99	1.13793	Carbamidomethylation; Oxidation (M)	72765.8	Glutamate--cysteine ligase catalytic subunit OS=Homo sapiens OX=9606 GN=GCLC PE=1 SV=2
1337	TRUE	P26440|IVD_HUMAN	202.918	8	8	6	7	1.16667	5	8	1.6		4	4		4	4	5	16	3.2	4	20	5	Carbamidomethylation	46650.8	Isovaleryl-CoA dehydrogenase, mitochondrial OS=Homo sapiens OX=9606 GN=IVD PE=1 SV=2
379	FALSE	O94808|GFPT2_HUMAN	160.442	4	4	6	7	1.16667	10	19	1.9	1				2	2	4	5	1.25	6	16	2.66667	Carbamidomethylation	76930.6	Glutamine--fructose-6-phosphate aminotransferase [isomerizing] 2 OS=Homo sapiens OX=9606 GN=GFPT2 PE=1 SV=3
1193	FALSE	A6NHQ2|FBLL1_HUMAN	86.5832	2	2	6	7	1.16667	7	6	0.857143					1	1	3	4	1.33333	3	7	2.33333		34803.3	rRNA/tRNA 2'-O-methyltransferase fibrillarin-like protein 1 OS=Homo sapiens OX=9606 GN=FBLL1 PE=3 SV=2
1461	TRUE	Q99439|CNN2_HUMAN	193.363	8	8	12	14	1.16667	15	16	1.06667	28	18	0.642857	5	23	4.6	6	7	1.16667	6	13	2.16667	Carbamidomethylation; Oxidation (M)	33697	Calponin-2 OS=Homo sapiens OX=9606 GN=CNN2 PE=1 SV=4
836	TRUE	Q96BM9|ARL8A_HUMAN	249.463	9	1	26	21	0.807692	25	38	1.52	15	8	0.533333		23	23	26	25	0.961538	23	39	1.69565	Carbamidomethylation	21415.9	ADP-ribosylation factor-like protein 8A OS=Homo sapiens OX=9606 GN=ARL8A PE=1 SV=1
2354	TRUE	P13473|LAMP2_HUMAN	126.763	3	3	12	14	1.16667	23	25	1.08696	1				1	1	6	8	1.33333	9	18	2		44960.7	Lysosome-associated membrane glycoprotein 2 OS=Homo sapiens OX=9606 GN=LAMP2 PE=1 SV=2
319	TRUE	Q7L014|DDX46_HUMAN	322.677	26	26	36	42	1.16667	28	44	1.57143	5	8	1.6	3	5	1.66667	83	70	0.843373	61	119	1.95082	Carbamidomethylation; Oxidation (M)	117362	Probable ATP-dependent RNA helicase DDX46 OS=Homo sapiens OX=9606 GN=DDX46 PE=1 SV=2
978	FALSE	Q8NHP1|ARK74_HUMAN	123.614	2	2	6	7	1.16667	2	5	2.5	6	10	1.66667	11	5	0.454545	11	14	1.27273	7	11	1.57143	Carbamidomethylation	36970	Aflatoxin B1 aldehyde reductase member 4 OS=Homo sapiens OX=9606 GN=AKR7L PE=2 SV=7
429	FALSE	O75914|PAK3_HUMAN	152.444	3	2	12	14	1.16667	15	11	0.733333	15	12	0.8	7	18	2.57143	13	14	1.07692	8	12	1.5	Carbamidomethylation	62309.6	Serine/threonine-protein kinase PAK 3 OS=Homo sapiens OX=9606 GN=PAK3 PE=1 SV=2
1871	TRUE	Q969X5|ERGI1_HUMAN	160.858	6	6	6	7	1.16667	4	16	4							5	10	2	6	8	1.33333		32592.3	Endoplasmic reticulum-Golgi intermediate compartment protein 1 OS=Homo sapiens OX=9606 GN=ERGIC1 PE=1 SV=1
1516	TRUE	Q14739|LBR_HUMAN	188.579	7	7	12	14	1.16667	19	26	1.36842	10	9	0.9	6	15	2.5	20	29	1.45	17	22	1.29412		70703.2	Delta(14)-sterol reductase LBR OS=Homo sapiens OX=9606 GN=LBR PE=1 SV=2
1326	TRUE	P55735|SEC13_HUMAN	203.73	7	7	18	21	1.16667	30	31	1.03333	33	40	1.21212		18	18	23	18	0.782609	17	14	0.823529	Carbamidomethylation	35540.5	Protein SEC13 homolog OS=Homo sapiens OX=9606 GN=SEC13 PE=1 SV=3
1786	TRUE	P84098|RL19_HUMAN	165.784	3	3	18	21	1.16667	25	19	0.76	33	22	0.666667	30	27	0.9	23	26	1.13043	24	19	0.791667		23466	60S ribosomal protein L19 OS=Homo sapiens OX=9606 GN=RPL19 PE=1 SV=1
1699	TRUE	Q5VW32|BROX_HUMAN	172.508	4	4	24	28	1.16667	17	19	1.11765	11	10	0.909091	13	13	1	15	19	1.26667	18	14	0.777778		46476.1	BRO1 domain-containing protein BROX OS=Homo sapiens OX=9606 GN=BROX PE=1 SV=1
2816	TRUE	Q8N0U8|VKORL_HUMAN	97.1893	3	3	6	7	1.16667	7	4	0.571429	11	10	0.909091	6	13	2.16667	2	3	1.5	5	3	0.6	Carbamidomethylation	19835.7	Vitamin K epoxide reductase complex subunit 1-like protein 1 OS=Homo sapiens OX=9606 GN=VKORC1L1 PE=1 SV=2
2686	TRUE	P15927|RFA2_HUMAN	105.035	2	2	6	7	1.16667	3	5	1.66667					4	4	2	3	1.5					29246.8	Replication protein A 32 kDa subunit OS=Homo sapiens OX=9606 GN=RPA2 PE=1 SV=1
337	TRUE	O00534|VMA5A_HUMAN	318.545	23	23	85	99	1.16471	47	96	2.04255	102	123	1.20588	42	115	2.7381	95	111	1.16842	88	109	1.23864	Carbamidomethylation; Oxidation (M)	86489.3	von Willebrand factor A domain-containing protein 5A OS=Homo sapiens OX=9606 GN=VWA5A PE=1 SV=2
789	TRUE	Q9Y305|ACOT9_HUMAN	254.013	16	16	86	100	1.16279	72	90	1.25	18	17	0.944444	15	54	3.6	38	38	1	41	48	1.17073	Carbamidomethylation	49901.7	Acyl-coenzyme A thioesterase 9, mitochondrial OS=Homo sapiens OX=9606 GN=ACOT9 PE=1 SV=2
178	TRUE	P46459|NSF_HUMAN	357.826	31	31	106	123	1.16038	130	141	1.08462	97	101	1.04124	71	94	1.32394	83	94	1.13253	85	127	1.49412	Carbamidomethylation	82594.3	Vesicle-fusing ATPase OS=Homo sapiens OX=9606 GN=NSF PE=1 SV=3
292	TRUE	Q6ZNJ1|NBEL2_HUMAN	326.408	32	32	75	87	1.16	71	98	1.38028	1				2	2	57	47	0.824561	21	44	2.09524	Carbamidomethylation	302517	Neurobeachin-like protein 2 OS=Homo sapiens OX=9606 GN=NBEAL2 PE=1 SV=2
498	TRUE	Q16181|SEPT7_HUMAN	292.122	14	13	75	87	1.16	75	84	1.12	102	78	0.764706	89	59	0.662921	81	85	1.04938	69	73	1.05797	Carbamidomethylation	50679.9	Septin-7 OS=Homo sapiens OX=9606 GN=SEPTIN7 PE=1 SV=2
1361	FALSE	Q9H2T7|RBP17_HUMAN	69.4485	1	1	3	6	2	2	3	1.5							4	6	1.5	3	5	1.66667		124375	Ran-binding protein 17 OS=Homo sapiens OX=9606 GN=RANBP17 PE=2 SV=1
1395	TRUE	P11234|RALB_HUMAN	198.286	4	2	25	29	1.16	27	28	1.03704	4				1	1	43	43	1	43	40	0.930233		23408.5	Ras-related protein Ral-B OS=Homo sapiens OX=9606 GN=RALB PE=1 SV=1
1396	TRUE	Q9HBI1|PARVB_HUMAN	198.258	6	6	25	29	1.16	20	23	1.15	8	4	0.5				7	10	1.42857	6	2	0.333333		41714.2	Beta-parvin OS=Homo sapiens OX=9606 GN=PARVB PE=1 SV=1
458	TRUE	P20700|LMNB1_HUMAN	296.45	23	22	63	73	1.15873	78	74	0.948718	41	22	0.536585	51	33	0.647059	61	52	0.852459	73	77	1.05479	Carbamidomethylation; Oxidation (M)	66408.3	Lamin-B1 OS=Homo sapiens OX=9606 GN=LMNB1 PE=1 SV=2
2128	TRUE	Q01844|EWS_HUMAN	143.934	4	4	19	22	1.15789	24	27	1.125	15	20	1.33333	25	28	1.12	12	10	0.833333	10	5	0.5	Carbamidomethylation	68478.2	RNA-binding protein EWS OS=Homo sapiens OX=9606 GN=EWSR1 PE=1 SV=1
811	TRUE	O43847|NRDC_HUMAN	251.806	19	19	26	30	1.15385	20	44	2.2	3	1	0.333333		1	1	21	34	1.61905	10	22	2.2	Carbamidomethylation	131701	Nardilysin OS=Homo sapiens OX=9606 GN=NRDC PE=1 SV=3
668	TRUE	P32189|GLPK_HUMAN	266.889	14	14	13	15	1.15385	83	92	1.10843	23	25	1.08696	70	81	1.15714	46	21	0.456522	60	71	1.18333	Carbamidomethylation	61244.6	Glycerol kinase OS=Homo sapiens OX=9606 GN=GK PE=1 SV=3
2394	TRUE	P0DJD1|RGPD2_HUMAN	123.245	5	1	3	3	1	10	4	0.4					1	1	5	5	1	6	10	1.66667		197308	RANBP2-like and GRIP domain-containing protein 2 OS=Homo sapiens OX=9606 GN=RGPD2 PE=2 SV=1
2394	TRUE	P0DJD0|RGPD1_HUMAN	123.245	5	1	3	3	1	10	4	0.4					1	1	5	5	1	6	10	1.66667		196662	RANBP2-like and GRIP domain-containing protein 1 OS=Homo sapiens OX=9606 GN=RGPD1 PE=2 SV=1
353	TRUE	Q9NY33|DPP3_HUMAN	314.056	21	21	85	98	1.15294	86	88	1.02326	37	20	0.540541	38	35	0.921053	79	55	0.696203	66	68	1.0303	Carbamidomethylation	82589.2	Dipeptidyl peptidase 3 OS=Homo sapiens OX=9606 GN=DPP3 PE=1 SV=2
724	TRUE	P05771|KPCB_HUMAN	259.746	17	12	59	68	1.15254	60	82	1.36667	16	25	1.5625	1	38	38	44	89	2.02273	45	74	1.64444	Carbamidomethylation; Oxidation (M)	76868.9	Protein kinase C beta type OS=Homo sapiens OX=9606 GN=PRKCB PE=1 SV=4
742	TRUE	Q14669|TRIPC_HUMAN	258.149	20	20	33	38	1.15152	36	89	2.47222				4	3	0.75	18	51	2.83333	13	49	3.76923	Carbamidomethylation	220434	E3 ubiquitin-protein ligase TRIP12 OS=Homo sapiens OX=9606 GN=TRIP12 PE=1 SV=1
413	TRUE	P04839|CY24B_HUMAN	302.929	22	22	73	84	1.15068	87	122	1.4023	61	56	0.918033	27	85	3.14815	51	73	1.43137	69	95	1.37681	Oxidation (M); Carbamidomethylation	65335.9	Cytochrome b-245 heavy chain OS=Homo sapiens OX=9606 GN=CYBB PE=1 SV=2
1304	TRUE	P63151|2ABA_HUMAN	204.626	9	9	20	23	1.15	38	38	1					4	4	12	8	0.666667	14	14	1		51692.1	Serine/threonine-protein phosphatase 2A 55 kDa regulatory subunit B alpha isoform OS=Homo sapiens OX=9606 GN=PPP2R2A PE=1 SV=1
1242	TRUE	Q9NSD9|SYFB_HUMAN	209.683	11	11	20	23	1.15	25	21	0.84	5	3	0.6	4			26	23	0.884615	23	17	0.73913	Carbamidomethylation	66115.6	Phenylalanine--tRNA ligase beta subunit OS=Homo sapiens OX=9606 GN=FARSB PE=1 SV=3
460	TRUE	Q9NUQ9|CYRIB_HUMAN	296.347	15	12	87	100	1.14943	86	97	1.12791	146	118	0.808219	121	134	1.10744	79	93	1.17722	91	105	1.15385	Carbamidomethylation; Oxidation (M)	36748	CYFIP-related Rac1 interactor B OS=Homo sapiens OX=9606 GN=CYRIB PE=1 SV=1
754	TRUE	P35237|SPB6_HUMAN	257.026	14	13	34	39	1.14706	33	51	1.54545	12	23	1.91667	18	40	2.22222	25	35	1.4	29	35	1.2069	Oxidation (M); Carbamidomethylation	42621.9	Serpin B6 OS=Homo sapiens OX=9606 GN=SERPINB6 PE=1 SV=3
2368	TRUE	O14787|TNPO2_HUMAN	125.71	4	1	4	6	1.5	5	13	2.6	8	9	1.125	5	7	1.4	6	2	0.333333	3	5	1.66667	Carbamidomethylation	101388	Transportin-2 OS=Homo sapiens OX=9606 GN=TNPO2 PE=1 SV=3
864	TRUE	Q8TD55|PKHO2_HUMAN	247	10	10	41	47	1.14634	31	38	1.22581	24	30	1.25	15	30	2	43	47	1.09302	35	56	1.6	Carbamidomethylation	53349.9	Pleckstrin homology domain-containing family O member 2 OS=Homo sapiens OX=9606 GN=PLEKHO2 PE=1 SV=1
1003	TRUE	Q8TCJ2|STT3B_HUMAN	232.516	8	8	7	8	1.14286	19	19	1	22	19	0.863636	15	18	1.2	10	18	1.8	8	16	2		93674.3	Dolichyl-diphosphooligosaccharide--protein glycosyltransferase subunit STT3B OS=Homo sapiens OX=9606 GN=STT3B PE=1 SV=1
1922	TRUE	Q15477|SKIV2_HUMAN	157.41	7	7	7	8	1.14286	4	11	2.75							6	19	3.16667	5	9	1.8	Carbamidomethylation	137755	Helicase SKI2W OS=Homo sapiens OX=9606 GN=SKIV2L PE=1 SV=3
1949	TRUE	P38117|ETFB_HUMAN	155.704	5	5	7	8	1.14286	17	14	0.823529	6	5	0.833333	6	7	1.16667	4	8	2	5	7	1.4	Carbamidomethylation	27843.6	Electron transfer flavoprotein subunit beta OS=Homo sapiens OX=9606 GN=ETFB PE=1 SV=3
2518	TRUE	Q9BRP8|PYM1_HUMAN	115.434	3	3	7	8	1.14286	4	9	2.25	6			6	3	0.5	4	7	1.75	9	11	1.22222		22655.5	Partner of Y14 and mago OS=Homo sapiens OX=9606 GN=PYM1 PE=1 SV=1
428	TRUE	P23368|MAOM_HUMAN	300.314	22	22	56	64	1.14286	89	88	0.988764	48	21	0.4375	21	30	1.42857	55	67	1.21818	63	71	1.12698	Carbamidomethylation; Oxidation (M)	65443.6	NAD-dependent malic enzyme, mitochondrial OS=Homo sapiens OX=9606 GN=ME2 PE=1 SV=1
1364	TRUE	Q9ULC5|ACSL5_HUMAN	201.081	10	9	21	24	1.14286	27	28	1.03704	3	7	2.33333	8	9	1.125	19	18	0.947368	16	17	1.0625	Carbamidomethylation	75990.8	Long-chain-fatty-acid--CoA ligase 5 OS=Homo sapiens OX=9606 GN=ACSL5 PE=1 SV=1
510	TRUE	P62424|RL7A_HUMAN	290.577	14	14	112	128	1.14286	106	91	0.858491	80	63	0.7875	48	52	1.08333	68	78	1.14706	77	80	1.03896	Carbamidomethylation; Oxidation (M)	29995.6	60S ribosomal protein L7a OS=Homo sapiens OX=9606 GN=RPL7A PE=1 SV=2
587	TRUE	P19338|NUCL_HUMAN	278.922	17	17	63	72	1.14286	79	46	0.582278	58	39	0.672414	60	41	0.683333	73	86	1.17808	88	83	0.943182	Oxidation (M)	76614.4	Nucleolin OS=Homo sapiens OX=9606 GN=NCL PE=1 SV=3
1829	TRUE	O14744|ANM5_HUMAN	163.494	7	7	7	8	1.14286	9	10	1.11111	1	2	2	2	10	5	12	16	1.33333	11	10	0.909091	Carbamidomethylation	72683.9	Protein arginine N-methyltransferase 5 OS=Homo sapiens OX=9606 GN=PRMT5 PE=1 SV=4
1982	TRUE	P50747|BPL1_HUMAN	153.156	6	6	7	8	1.14286	9	4	0.444444							6	6	1	10	8	0.8		80760	Biotin--protein ligase OS=Homo sapiens OX=9606 GN=HLCS PE=1 SV=1
2386	TRUE	P30046|DOPD_HUMAN	123.98	3	3	7	8	1.14286	11	12	1.09091	17	9	0.529412	6	18	3	13	12	0.923077	9	7	0.777778		12711.8	D-dopachrome decarboxylase OS=Homo sapiens OX=9606 GN=DDT PE=1 SV=3
1704	TRUE	Q9Y224|RTRAF_HUMAN	172.309	5	5	7	8	1.14286	8			27			15			7	6	0.857143	6	4	0.666667		28068.1	RNA transcription, translation and transport factor protein OS=Homo sapiens OX=9606 GN=RTRAF PE=1 SV=1
2570	TRUE	O43760|SNG2_HUMAN	112.344	4	4	7	8	1.14286	8	13	1.625														24810	Synaptogyrin-2 OS=Homo sapiens OX=9606 GN=SYNGR2 PE=1 SV=1
394	TRUE	Q16531|DDB1_HUMAN	306.505	25	25	78	89	1.14103	74	98	1.32432	18	17	0.944444	15	20	1.33333	43	67	1.55814	52	38	0.730769	Carbamidomethylation	126968	DNA damage-binding protein 1 OS=Homo sapiens OX=9606 GN=DDB1 PE=1 SV=1
979	TRUE	O43586|PPIP1_HUMAN	234.763	9	9	50	57	1.14	53	56	1.0566	14	15	1.07143	3			42	51	1.21429	27	29	1.07407	Carbamidomethylation	47591.3	Proline-serine-threonine phosphatase-interacting protein 1 OS=Homo sapiens OX=9606 GN=PSTPIP1 PE=1 SV=1
519	TRUE	P61421|VA0D1_HUMAN	289.531	14	12	43	49	1.13953	47	56	1.19149	39	30	0.769231	26	40	1.53846	55	53	0.963636	41	64	1.56098	Carbamidomethylation; Oxidation (M)	40329.1	V-type proton ATPase subunit d 1 OS=Homo sapiens OX=9606 GN=ATP6V0D1 PE=1 SV=1
156	TRUE	P61158|ARP3_HUMAN	367.174	25	25	287	327	1.13937	280	272	0.971429	333	317	0.951952	235	314	1.33617	280	260	0.928571	370	268	0.724324	Carbamidomethylation; Oxidation (M)	47371.2	Actin-related protein 3 OS=Homo sapiens OX=9606 GN=ACTR3 PE=1 SV=3
956	TRUE	P52788|SPSY_HUMAN	237.056	13	13	36	41	1.13889	20	29	1.45	6	23	3.83333	3			39	35	0.897436	25	30	1.2	Carbamidomethylation	41268.2	Spermine synthase OS=Homo sapiens OX=9606 GN=SMS PE=1 SV=2
52	TRUE	P52790|HXK3_HUMAN	425.717	53	50	379	431	1.1372	474	568	1.19831	204	247	1.21078	145	219	1.51034	482	442	0.917012	372	428	1.15054	Carbamidomethylation; Oxidation (M)	99025.4	Hexokinase-3 OS=Homo sapiens OX=9606 GN=HK3 PE=1 SV=2
1150	TRUE	Q7L2H7|EIF3M_HUMAN	219.259	9	9	22	25	1.13636	9	23	2.55556	3	2	0.666667	2	3	1.5	28	26	0.928571	18	21	1.16667	Carbamidomethylation; Oxidation (M)	42502.9	Eukaryotic translation initiation factor 3 subunit M OS=Homo sapiens OX=9606 GN=EIF3M PE=1 SV=1
102	TRUE	Q9Y3Z3|SAMH1_HUMAN	386.443	40	40	280	318	1.13571	323	422	1.3065	198	257	1.29798	226	291	1.28761	230	246	1.06957	244	291	1.19262	Carbamidomethylation; Oxidation (M)	72200.5	Deoxynucleoside triphosphate triphosphohydrolase SAMHD1 OS=Homo sapiens OX=9606 GN=SAMHD1 PE=1 SV=2
388	TRUE	O60486|PLXC1_HUMAN	307.273	24	24	67	76	1.13433	46	55	1.19565				1			62	70	1.12903	36	51	1.41667	Carbamidomethylation	175742	Plexin-C1 OS=Homo sapiens OX=9606 GN=PLXNC1 PE=1 SV=1
549	TRUE	P41226|UBA7_HUMAN	283.406	17	17	15	17	1.13333	26	74	2.84615	1	3	3	5	4	0.8	27	29	1.07407	16	37	2.3125	Carbamidomethylation	111694	Ubiquitin-like modifier-activating enzyme 7 OS=Homo sapiens OX=9606 GN=UBA7 PE=1 SV=2
1328	TRUE	Q6IA69|NADE_HUMAN	203.69	10	10	15	17	1.13333	14	32	2.28571	2	1	0.5	1	21	21	14	18	1.28571	8	17	2.125	Carbamidomethylation	79284.7	Glutamine-dependent NAD(+) synthetase OS=Homo sapiens OX=9606 GN=NADSYN1 PE=1 SV=3
240	TRUE	Q27J81|INF2_HUMAN	340.767	29	29	90	102	1.13333	84	107	1.27381	30	13	0.433333	4	19	4.75	85	101	1.18824	46	61	1.32609	Carbamidomethylation	135624	Inverted formin-2 OS=Homo sapiens OX=9606 GN=INF2 PE=1 SV=2
1411	TRUE	P06703|S10A6_HUMAN	197.31	8	8	15	17	1.13333	23	10	0.434783	39	5	0.128205	30	10	0.333333	16	20	1.25	18	20	1.11111		10179.7	Protein S100-A6 OS=Homo sapiens OX=9606 GN=S100A6 PE=1 SV=1
1661	TRUE	P57088|TMM33_HUMAN	175.687	6	6	15	17	1.13333	19	32	1.68421	11	8	0.727273	7	5	0.714286	8	11	1.375	11	12	1.09091	Carbamidomethylation	27978.2	Transmembrane protein 33 OS=Homo sapiens OX=9606 GN=TMEM33 PE=1 SV=2
455	TRUE	P16435|NCPR_HUMAN	297.089	20	20	60	68	1.13333	53	74	1.39623	40	35	0.875	31	47	1.51613	69	66	0.956522	82	71	0.865854	Carbamidomethylation	76689.7	NADPH--cytochrome P450 reductase OS=Homo sapiens OX=9606 GN=POR PE=1 SV=2
1173	TRUE	Q9P0L0|VAPA_HUMAN	216.57	7	6	30	34	1.13333	29	38	1.31034	27	22	0.814815	21	42	2	55	46	0.836364	57	46	0.807018		27893.2	Vesicle-associated membrane protein-associated protein A OS=Homo sapiens OX=9606 GN=VAPA PE=1 SV=3
77	TRUE	Q96KP4|CNDP2_HUMAN	403.123	30	30	236	267	1.13136	253	320	1.26482	125	106	0.848	143	166	1.16084	233	201	0.862661	250	255	1.02	Carbamidomethylation; Oxidation (M)	52878.5	Cytosolic non-specific dipeptidase OS=Homo sapiens OX=9606 GN=CNDP2 PE=1 SV=2
704	TRUE	Q8N8A2|ANR44_HUMAN	262.035	13	13	23	26	1.13043	50	117	2.34		2	2	12	20	1.66667	20	32	1.6	11	36	3.27273	Carbamidomethylation	107603	Serine/threonine-protein phosphatase 6 regulatory ankyrin repeat subunit B OS=Homo sapiens OX=9606 GN=ANKRD44 PE=1 SV=3
2872	TRUE	Q9Y5U9|IR3IP_HUMAN	93.3003	1	1	8	12	1.5	11	16	1.45455	3							7	7	5	8	1.6		8968.76	Immediate early response 3-interacting protein 1 OS=Homo sapiens OX=9606 GN=IER3IP1 PE=1 SV=1
1394	TRUE	P36871|PGM1_HUMAN	198.451	8	8	23	26	1.13043	15	11	0.733333	3			5	4	0.8	5	4	0.8		2	2	Carbamidomethylation	61449.1	Phosphoglucomutase-1 OS=Homo sapiens OX=9606 GN=PGM1 PE=1 SV=3
1101	TRUE	Q96D96|HVCN1_HUMAN	223.059	6	6	23	26	1.13043	28	36	1.28571	7	3	0.428571	2	6	3	21	18	0.857143	14	17	1.21429	Carbamidomethylation	31683.2	Voltage-gated hydrogen channel 1 OS=Homo sapiens OX=9606 GN=HVCN1 PE=1 SV=1
406	TRUE	P35580|MYH10_HUMAN	304.286	20	2	115	130	1.13043	129	123	0.953488	90	49	0.544444	49	72	1.46939	98	90	0.918367	100	88	0.88	Carbamidomethylation; Oxidation (M)	228999	Myosin-10 OS=Homo sapiens OX=9606 GN=MYH10 PE=1 SV=3
2825	TRUE	P30613|KPYR_HUMAN	96.8583	2	1	25	21	0.84	25	33	1.32	6	5	0.833333	6	8	1.33333	13	17	1.30769	10	16	1.6		61830.2	Pyruvate kinase PKLR OS=Homo sapiens OX=9606 GN=PKLR PE=1 SV=2
145	TRUE	Q13459|MYO9B_HUMAN	370.722	50	50	200	226	1.13	151	210	1.39073	44	49	1.11364	17	58	3.41176	130	146	1.12308	86	102	1.18605	Carbamidomethylation; Oxidation (M)	243401	Unconventional myosin-IXb OS=Homo sapiens OX=9606 GN=MYO9B PE=1 SV=3
261	TRUE	P09769|FGR_HUMAN	334.834	22	21	77	87	1.12987	64	111	1.73438	47	60	1.2766	29	46	1.58621	83	91	1.09639	53	77	1.45283	Oxidation (M); Carbamidomethylation	59478.6	Tyrosine-protein kinase Fgr OS=Homo sapiens OX=9606 GN=FGR PE=1 SV=2
133	TRUE	Q9Y6N5|SQOR_HUMAN	374.503	28	28	155	175	1.12903	234	235	1.00427	131	145	1.10687	126	199	1.57937	192	216	1.125	207	264	1.27536	Oxidation (M); Carbamidomethylation	49960.7	Sulfide:quinone oxidoreductase, mitochondrial OS=Homo sapiens OX=9606 GN=SQOR PE=1 SV=1
767	TRUE	P51665|PSMD7_HUMAN	256.129	11	11	31	35	1.12903	40	28	0.7	18	19	1.05556	22	9	0.409091	29	34	1.17241	28	33	1.17857	Carbamidomethylation	37025.4	26S proteasome non-ATPase regulatory subunit 7 OS=Homo sapiens OX=9606 GN=PSMD7 PE=1 SV=2
71	TRUE	P26038|MOES_HUMAN	407.259	35	25	451	509	1.1286	452	519	1.14823	369	317	0.859079	351	357	1.01709	423	471	1.11348	509	493	0.968566	Oxidation (M); Carbamidomethylation	67820	Moesin OS=Homo sapiens OX=9606 GN=MSN PE=1 SV=3
421	TRUE	Q2M389|WASC4_HUMAN	302.074	28	28	47	53	1.12766	46	96	2.08696	1	2	2	1	23	23	29	56	1.93103	30	62	2.06667	Carbamidomethylation	136403	WASH complex subunit 4 OS=Homo sapiens OX=9606 GN=WASHC4 PE=1 SV=2
114	TRUE	Q16881|TRXR1_HUMAN	382.88	30	29	103	116	1.12621	88	118	1.34091	89	87	0.977528	64	58	0.90625	122	169	1.38525	135	177	1.31111	Carbamidomethylation; Oxidation (M)	70874.9	Thioredoxin reductase 1, cytoplasmic OS=Homo sapiens OX=9606 GN=TXNRD1 PE=1 SV=3
28	TRUE	P12814|ACTN1_HUMAN	457.877	63	39	814	916	1.12531	626	677	1.08147	442	433	0.979638	269	316	1.17472	1204	1164	0.966777	903	987	1.09302	Oxidation (M); Carbamidomethylation	103058	Alpha-actinin-1 OS=Homo sapiens OX=9606 GN=ACTN1 PE=1 SV=2
1833	TRUE	Q9Y4P1|ATG4B_HUMAN	163.327	5	5	8	9	1.125	5	13	2.6	5	20	4		5	5	9	22	2.44444		10	10	Carbamidomethylation	44294.4	Cysteine protease ATG4B OS=Homo sapiens OX=9606 GN=ATG4B PE=1 SV=2
746	TRUE	P52597|HNRPF_HUMAN	257.729	10	8	32	36	1.125	35	48	1.37143	28	26	0.928571	20	41	2.05	32	26	0.8125	23	36	1.56522	Carbamidomethylation	45671.8	Heterogeneous nuclear ribonucleoprotein F OS=Homo sapiens OX=9606 GN=HNRNPF PE=1 SV=3
834	TRUE	O43747|AP1G1_HUMAN	249.518	13	13	32	36	1.125	40	46	1.15	2	3	1.5	1	3	3	41	37	0.902439	26	40	1.53846	Carbamidomethylation	91351.4	AP-1 complex subunit gamma-1 OS=Homo sapiens OX=9606 GN=AP1G1 PE=1 SV=5
2051	TRUE	Q99733|NP1L4_HUMAN	148.611	5	4	8	9	1.125	8	6	0.75	8	6	0.75	5	6	1.2	12	10	0.833333	9	12	1.33333		42823.4	Nucleosome assembly protein 1-like 4 OS=Homo sapiens OX=9606 GN=NAP1L4 PE=1 SV=1
1273	TRUE	P34810|CD68_HUMAN	207.392	7	7	16	18	1.125	36	29	0.805556	18	4	0.222222		12	12	20	23	1.15	23	30	1.30435	Carbamidomethylation	37408.2	Macrosialin OS=Homo sapiens OX=9606 GN=CD68 PE=1 SV=2
973	TRUE	P61106|RAB14_HUMAN	235.401	11	10	48	54	1.125	48	55	1.14583	49	37	0.755102	39	49	1.25641	31	35	1.12903	38	45	1.18421	Oxidation (M); Carbamidomethylation	23896.9	Ras-related protein Rab-14 OS=Homo sapiens OX=9606 GN=RAB14 PE=1 SV=4
1410	TRUE	P05026|AT1B1_HUMAN	197.345	7	7	24	27	1.125	20	18	0.9	20	14	0.7	14	30	2.14286	23	33	1.43478	39	28	0.717949	Carbamidomethylation; Oxidation (M)	35061.3	Sodium/potassium-transporting ATPase subunit beta-1 OS=Homo sapiens OX=9606 GN=ATP1B1 PE=1 SV=1
1127	TRUE	Q9HBI0|PARVG_HUMAN	221.176	10	10	24	27	1.125	25	26	1.04	18	15	0.833333	14	13	0.928571	21	11	0.52381	22	14	0.636364		37485.3	Gamma-parvin OS=Homo sapiens OX=9606 GN=PARVG PE=1 SV=1
207	TRUE	P19878|NCF2_HUMAN	349.875	26	26	121	136	1.12397	175	241	1.37714	123	105	0.853659	108	172	1.59259	105	117	1.11429	128	152	1.1875	Oxidation (M); Carbamidomethylation	59761.5	Neutrophil cytosol factor 2 OS=Homo sapiens OX=9606 GN=NCF2 PE=1 SV=2
176	TRUE	P33121|ACSL1_HUMAN	358.469	32	31	154	173	1.12338	204	273	1.33824	101	97	0.960396	106	166	1.56604	133	141	1.06015	119	176	1.47899	Carbamidomethylation; Oxidation (M)	77943.3	Long-chain-fatty-acid--CoA ligase 1 OS=Homo sapiens OX=9606 GN=ACSL1 PE=1 SV=1
1004	TRUE	Q13217|DNJC3_HUMAN	232.376	11	11	25	28	1.12	21	31	1.47619	25	15	0.6	5	1	0.2	30	24	0.8	21	25	1.19048	Carbamidomethylation; Oxidation (M)	57580.1	DnaJ homolog subfamily C member 3 OS=Homo sapiens OX=9606 GN=DNAJC3 PE=1 SV=1
733	TRUE	P16278|BGAL_HUMAN	258.945	15	15	25	28	1.12	37	40	1.08108	8	5	0.625	8	6	0.75	30	28	0.933333	26	30	1.15385	Carbamidomethylation	76074.9	Beta-galactosidase OS=Homo sapiens OX=9606 GN=GLB1 PE=1 SV=2
575	TRUE	Q9UJ70|NAGK_HUMAN	280.433	12	12	67	75	1.1194	83	91	1.09639	47	82	1.74468	32	76	2.375	60	75	1.25	73	91	1.24658	Carbamidomethylation	37375.7	N-acetyl-D-glucosamine kinase OS=Homo sapiens OX=9606 GN=NAGK PE=1 SV=4
686	TRUE	P16671|CD36_HUMAN	264.351	10	10	42	47	1.11905	33	50	1.51515	87	115	1.32184	30	107	3.56667	41	70	1.70732	47	101	2.14894	Carbamidomethylation	53053.4	Platelet glycoprotein 4 OS=Homo sapiens OX=9606 GN=CD36 PE=1 SV=2
614	TRUE	P10644|KAP0_HUMAN	275.348	12	12	68	76	1.11765	72	71	0.986111	59	47	0.79661	50	60	1.2	61	60	0.983607	52	67	1.28846	Carbamidomethylation	42981.7	cAMP-dependent protein kinase type I-alpha regulatory subunit OS=Homo sapiens OX=9606 GN=PRKAR1A PE=1 SV=1
1325	TRUE	Q00796|DHSO_HUMAN	203.757	7	7	17	19	1.11765	17	23	1.35294	14	16	1.14286	5	3	0.6	44	25	0.568182	27	33	1.22222	Carbamidomethylation	38324.5	Sorbitol dehydrogenase OS=Homo sapiens OX=9606 GN=SORD PE=1 SV=4
1650	TRUE	P46087|NOP2_HUMAN	176.34	8	8	17	19	1.11765	13	17	1.30769	3	3	1				14	14	1	15	18	1.2	Carbamidomethylation	89301.8	Probable 28S rRNA (cytosine(4447)-C(5))-methyltransferase OS=Homo sapiens OX=9606 GN=NOP2 PE=1 SV=2
546	TRUE	Q9Y2J2|E41L3_HUMAN	284.172	20	19	34	38	1.11765	60	74	1.23333	18	22	1.22222	63	70	1.11111	26	28	1.07692	26	24	0.923077	Carbamidomethylation	120678	Band 4.1-like protein 3 OS=Homo sapiens OX=9606 GN=EPB41L3 PE=1 SV=2
1475	TRUE	P62888|RL30_HUMAN	191.97	6	6	17	19	1.11765	20	19	0.95	27	22	0.814815	34	42	1.23529	17	15	0.882353	18	16	0.888889	Oxidation (M); Carbamidomethylation	12784	60S ribosomal protein L30 OS=Homo sapiens OX=9606 GN=RPL30 PE=1 SV=2
107	TRUE	P16615|AT2A2_HUMAN	384.724	37	24	222	248	1.11712	226	287	1.26991	150	168	1.12	117	163	1.39316	194	185	0.953608	160	222	1.3875	Oxidation (M); Carbamidomethylation	114757	Sarcoplasmic/endoplasmic reticulum calcium ATPase 2 OS=Homo sapiens OX=9606 GN=ATP2A2 PE=1 SV=1
735	TRUE	Q14240|IF4A2_HUMAN	258.669	10	2	86	96	1.11628	90	102	1.13333	82	74	0.902439	60	68	1.13333	101	97	0.960396	85	82	0.964706	Carbamidomethylation; Oxidation (M)	46402.3	Eukaryotic initiation factor 4A-II OS=Homo sapiens OX=9606 GN=EIF4A2 PE=1 SV=2
898	TRUE	O14579|COPE_HUMAN	243.077	10	10	26	29	1.11538	34	23	0.676471	35				24	24	29	29	1	23	37	1.6087	Carbamidomethylation	34482	Coatomer subunit epsilon OS=Homo sapiens OX=9606 GN=COPE PE=1 SV=3
884	TRUE	P51570|GALK1_HUMAN	244.598	11	11	26	29	1.11538	26	44	1.69231	16	33	2.0625	6	23	3.83333	27	30	1.11111	24	13	0.541667	Carbamidomethylation	42272.2	Galactokinase OS=Homo sapiens OX=9606 GN=GALK1 PE=1 SV=1
437	TRUE	P54577|SYYC_HUMAN	299.527	22	22	61	68	1.11475	72	91	1.26389	43	65	1.51163	58	63	1.08621	65	65	1	78	75	0.961538	Carbamidomethylation; Oxidation (M)	59143.5	Tyrosine--tRNA ligase, cytoplasmic OS=Homo sapiens OX=9606 GN=YARS1 PE=1 SV=4
64	TRUE	Q13813|SPTN1_HUMAN	409.994	80	80	262	292	1.1145	198	300	1.51515	3				20	20	92	120	1.30435	70	111	1.58571	Carbamidomethylation	284539	Spectrin alpha chain, non-erythrocytic 1 OS=Homo sapiens OX=9606 GN=SPTAN1 PE=1 SV=3
570	TRUE	Q8TCT9|HM13_HUMAN	280.927	12	12	80	89	1.1125	75	116	1.54667	159	78	0.490566	69	105	1.52174	98	114	1.16327	83	90	1.08434	Oxidation (M); Carbamidomethylation	41488.3	Minor histocompatibility antigen H13 OS=Homo sapiens OX=9606 GN=HM13 PE=1 SV=1
1875	TRUE	Q9UPN9|TRI33_HUMAN	160.786	7	7	9	10	1.11111	6	17	2.83333							4	7	1.75	3	7	2.33333	Carbamidomethylation	122533	E3 ubiquitin-protein ligase TRIM33 OS=Homo sapiens OX=9606 GN=TRIM33 PE=1 SV=3
1824	TRUE	Q86XA9|HTR5A_HUMAN	163.839	6	5	9	10	1.11111	11	10	0.909091							9	8	0.888889	7	15	2.14286		222004	HEAT repeat-containing protein 5A OS=Homo sapiens OX=9606 GN=HEATR5A PE=1 SV=2
1571	TRUE	Q6YN16|HSDL2_HUMAN	183.959	6	6	9	10	1.11111	8	11	1.375	8	2	0.25	6	1	0.166667	14	16	1.14286	9	16	1.77778	Carbamidomethylation	45394.7	Hydroxysteroid dehydrogenase-like protein 2 OS=Homo sapiens OX=9606 GN=HSDL2 PE=1 SV=1
2836	TRUE	P29558|RBMS1_HUMAN	96.2528	2	2	9	10	1.11111	7	9	1.28571							5	9	1.8	2	3	1.5	Carbamidomethylation	44505.3	RNA-binding motif, single-stranded-interacting protein 1 OS=Homo sapiens OX=9606 GN=RBMS1 PE=1 SV=3
2605	TRUE	P61803|DAD1_HUMAN	110.4	2	2	9	10	1.11111	9	12	1.33333	7	5	0.714286	5	8	1.6	5	8	1.6	5	7	1.4		12496.7	Dolichyl-diphosphooligosaccharide--protein glycosyltransferase subunit DAD1 OS=Homo sapiens OX=9606 GN=DAD1 PE=1 SV=3
851	TRUE	Q13492|PICAL_HUMAN	248.282	11	11	27	30	1.11111	23	46	2	33	48	1.45455	46	61	1.32609	35	40	1.14286	37	45	1.21622		70754.5	Phosphatidylinositol-binding clathrin assembly protein OS=Homo sapiens OX=9606 GN=PICALM PE=1 SV=2
1434	TRUE	P50897|PPT1_HUMAN	195.251	6	6	18	20	1.11111	11	17	1.54545	19	23	1.21053	12	21	1.75	11	15	1.36364	12	13	1.08333	Carbamidomethylation; Oxidation (M)	34193.5	Palmitoyl-protein thioesterase 1 OS=Homo sapiens OX=9606 GN=PPT1 PE=1 SV=1
11	FALSE	P53675|CLH2_HUMAN	337.341	28	28	227	252	1.11013	280	239	0.853571	128	123	0.960938	97	122	1.25773	174	141	0.810345	139	148	1.06475	Oxidation (M); Carbamidomethylation	187030	Clathrin heavy chain 2 OS=Homo sapiens OX=9606 GN=CLTCL1 PE=1 SV=2
874	TRUE	Q9BWM7|SFXN3_HUMAN	245.43	11	9	55	61	1.10909	61	77	1.2623	34	44	1.29412	15	45	3	43	53	1.23256	48	63	1.3125	Oxidation (M)	35503.3	Sideroflexin-3 OS=Homo sapiens OX=9606 GN=SFXN3 PE=1 SV=3
54	TRUE	P50395|GDIB_HUMAN	418.3	42	29	358	397	1.10894	331	402	1.2145	348	293	0.841954	214	341	1.59346	368	363	0.986413	347	351	1.01153	Oxidation (M); Carbamidomethylation	50663.2	Rab GDP dissociation inhibitor beta OS=Homo sapiens OX=9606 GN=GDI2 PE=1 SV=2
416	TRUE	P49589|SYCC_HUMAN	302.712	22	22	37	41	1.10811	65	81	1.24615	12	12	1	11	31	2.81818	33	28	0.848485	32	50	1.5625	Carbamidomethylation	85473.3	Cysteine--tRNA ligase, cytoplasmic OS=Homo sapiens OX=9606 GN=CARS1 PE=1 SV=3
728	TRUE	P46926|GNPI1_HUMAN	259.441	11	6	37	41	1.10811	40	42	1.05	56	39	0.696429	26	33	1.26923	36	35	0.972222	23	25	1.08696	Carbamidomethylation; Oxidation (M)	32668.5	Glucosamine-6-phosphate isomerase 1 OS=Homo sapiens OX=9606 GN=GNPDA1 PE=1 SV=1
271	TRUE	P00352|AL1A1_HUMAN	331.37	26	26	65	72	1.10769	108	132	1.22222	46	39	0.847826	84	70	0.833333	94	85	0.904255	102	116	1.13725	Oxidation (M); Carbamidomethylation	54861.8	Retinal dehydrogenase 1 OS=Homo sapiens OX=9606 GN=ALDH1A1 PE=1 SV=2
835	TRUE	Q9P107|GMIP_HUMAN	249.465	16	16	28	31	1.10714	17	32	1.88235		3	3	1	2	2	34	31	0.911765	10	29	2.9	Carbamidomethylation	106683	GEM-interacting protein OS=Homo sapiens OX=9606 GN=GMIP PE=1 SV=2
1313	TRUE	Q04917|1433F_HUMAN	204.224	6	5	188	208	1.10638	155	175	1.12903	126	82	0.650794	97	72	0.742268	80	72	0.9	58	50	0.862069	Oxidation (M); Carbamidomethylation	28218.7	14-3-3 protein eta OS=Homo sapiens OX=9606 GN=YWHAH PE=1 SV=4
3121	TRUE	Q8WVJ2|NUDC2_HUMAN	78.0707	2	2	19	21	1.10526											22	22	21				17675.9	NudC domain-containing protein 2 OS=Homo sapiens OX=9606 GN=NUDCD2 PE=1 SV=1
847	TRUE	O15371|EIF3D_HUMAN	248.877	14	14	29	32	1.10345	26	46	1.76923	15	15	1	11	22	2	55	50	0.909091	40	38	0.95	Carbamidomethylation	63972.8	Eukaryotic translation initiation factor 3 subunit D OS=Homo sapiens OX=9606 GN=EIF3D PE=1 SV=1
1459	TRUE	P61353|RL27_HUMAN	193.422	4	4	29	32	1.10345	28	28	1	13	9	0.692308	20	8	0.4	12	17	1.41667	18	14	0.777778	Oxidation (M)	15797.7	60S ribosomal protein L27 OS=Homo sapiens OX=9606 GN=RPL27 PE=1 SV=2
284	TRUE	Q14152|EIF3A_HUMAN	328.438	29	29	97	107	1.10309	86	118	1.37209	33	37	1.12121	28	60	2.14286	55	74	1.34545	41	72	1.7561	Carbamidomethylation	166569	Eukaryotic translation initiation factor 3 subunit A OS=Homo sapiens OX=9606 GN=EIF3A PE=1 SV=1
299	TRUE	P40926|MDHM_HUMAN	325.597	15	15	136	150	1.10294	126	153	1.21429	159	152	0.955975	112	160	1.42857	168	162	0.964286	162	165	1.01852	Oxidation (M); Carbamidomethylation	35503.3	Malate dehydrogenase, mitochondrial OS=Homo sapiens OX=9606 GN=MDH2 PE=1 SV=3
69	TRUE	P11215|ITAM_HUMAN	408.046	42	39	246	271	1.10163	209	260	1.24402	150	124	0.826667	103	156	1.51456	161	201	1.24845	138	171	1.23913	Carbamidomethylation; Oxidation (M)	127178	Integrin alpha-M OS=Homo sapiens OX=9606 GN=ITGAM PE=1 SV=2
615	TRUE	P78417|GSTO1_HUMAN	275.305	18	18	79	87	1.10127	58	75	1.2931	64	55	0.859375	52	52	1	48	56	1.16667	42	50	1.19048	Carbamidomethylation	27565.9	Glutathione S-transferase omega-1 OS=Homo sapiens OX=9606 GN=GSTO1 PE=1 SV=2
1024	TRUE	O95544|NADK_HUMAN	230.15	10	10	10	11	1.1	14	46	3.28571	2	6	3	10	9	0.9	4	18	4.5	2	31	15.5	Carbamidomethylation	49228.2	NAD kinase OS=Homo sapiens OX=9606 GN=NADK PE=1 SV=1
1424	TRUE	P98171|RHG04_HUMAN	195.66	8	8	20	22	1.1	30	33	1.1	2	1	0.5	1			5	8	1.6		4	4		105026	Rho GTPase-activating protein 4 OS=Homo sapiens OX=9606 GN=ARHGAP4 PE=1 SV=2
1707	TRUE	O75608|LYPA1_HUMAN	172.144	5	5	10	11	1.1	14	16	1.14286	7	12	1.71429	8	6	0.75	9	13	1.44444	4	15	3.75	Carbamidomethylation	24669.6	Acyl-protein thioesterase 1 OS=Homo sapiens OX=9606 GN=LYPLA1 PE=1 SV=1
1891	TRUE	Q9H553|ALG2_HUMAN	159.775	6	6	10	11	1.1	16	19	1.1875	1	2	2	1	5	5	13	10	0.769231	3	10	3.33333		47091.5	Alpha-1,3/1,6-mannosyltransferase ALG2 OS=Homo sapiens OX=9606 GN=ALG2 PE=1 SV=1
2197	TRUE	Q96G23|CERS2_HUMAN	139.369	3	3	20	22	1.1	19	28	1.47368	8	10	1.25		12	12	10	19	1.9	6	18	3		44876.1	Ceramide synthase 2 OS=Homo sapiens OX=9606 GN=CERS2 PE=1 SV=1
1417	TRUE	Q9UQ35|SRRM2_HUMAN	197.104	14	14	20	22	1.1	13	5	0.384615	1	1	1		4	4	23	19	0.826087	16	28	1.75		299615	Serine/arginine repetitive matrix protein 2 OS=Homo sapiens OX=9606 GN=SRRM2 PE=1 SV=2
776	TRUE	Q5JTH9|RRP12_HUMAN	255.134	16	16	20	22	1.1	18	44	2.44444	1	1	1		1	1	21	22	1.04762	21	35	1.66667	Carbamidomethylation	143702	RRP12-like protein OS=Homo sapiens OX=9606 GN=RRP12 PE=1 SV=2
773	TRUE	Q9BS26|ERP44_HUMAN	255.849	10	10	20	22	1.1	36	40	1.11111	19	13	0.684211	4	12	3	26	24	0.923077	24	33	1.375	Carbamidomethylation	46971.2	Endoplasmic reticulum resident protein 44 OS=Homo sapiens OX=9606 GN=ERP44 PE=1 SV=1
2207	TRUE	P46976|GLYG_HUMAN	138.672	3	3	10	11	1.1	12	10	0.833333							3	3	1		1	1	Oxidation (M)	39383.8	Glycogenin-1 OS=Homo sapiens OX=9606 GN=GYG1 PE=1 SV=4
846	TRUE	Q9Y5P4|CERT_HUMAN	249.005	13	13	20	22	1.1	18	18	1		1	1	1	1	1	40	30	0.75	19	19	1	Carbamidomethylation	70834.9	Ceramide transfer protein OS=Homo sapiens OX=9606 GN=CERT1 PE=1 SV=1
1247	TRUE	P36542|ATPG_HUMAN	209.454	7	7	30	33	1.1	33	34	1.0303	33	42	1.27273	26	31	1.19231	20	25	1.25	25	24	0.96	Carbamidomethylation	32996	ATP synthase subunit gamma, mitochondrial OS=Homo sapiens OX=9606 GN=ATP5F1C PE=1 SV=1
338	TRUE	Q92841|DDX17_HUMAN	317.789	22	15	110	121	1.1	117	95	0.811966	53	77	1.45283	53	82	1.54717	59	68	1.15254	72	65	0.902778	Carbamidomethylation; Oxidation (M)	80272.4	Probable ATP-dependent RNA helicase DDX17 OS=Homo sapiens OX=9606 GN=DDX17 PE=1 SV=2
116	TRUE	O75165|DJC13_HUMAN	381.689	49	49	162	178	1.09877	220	240	1.09091	38	27	0.710526	32	38	1.1875	129	97	0.751938	106	94	0.886792	Carbamidomethylation; Oxidation (M)	254415	DnaJ homolog subfamily C member 13 OS=Homo sapiens OX=9606 GN=DNAJC13 PE=1 SV=5
313	TRUE	P63104|1433Z_HUMAN	324.197	15	11	305	335	1.09836	253	268	1.05929	245	232	0.946939	223	220	0.986547	199	209	1.05025	187	169	0.903743	Carbamidomethylation; Oxidation (M)	27745.1	14-3-3 protein zeta/delta OS=Homo sapiens OX=9606 GN=YWHAZ PE=1 SV=1
76	FALSE	A6NMY6|AXA2L_HUMAN	364.573	26	26	346	380	1.09827	314	325	1.03503	230	218	0.947826	191	190	0.994764	284	277	0.975352	256	242	0.945312	Carbamidomethylation; Oxidation (M)	38659	Putative annexin A2-like protein OS=Homo sapiens OX=9606 GN=ANXA2P2 PE=5 SV=2
160	TRUE	P08567|PLEK_HUMAN	363.244	22	22	112	123	1.09821	139	154	1.10791	121	87	0.719008	84	110	1.30952	165	157	0.951515	161	184	1.14286	Carbamidomethylation; Oxidation (M)	40124.9	Pleckstrin OS=Homo sapiens OX=9606 GN=PLEK PE=1 SV=3
316	TRUE	Q9Y4K1|CRBG1_HUMAN	323.69	27	27	41	45	1.09756	62	82	1.32258	2	2	1	1	3	3	67	78	1.16418	53	73	1.37736	Carbamidomethylation	188676	Beta/gamma crystallin domain-containing protein 1 OS=Homo sapiens OX=9606 GN=CRYBG1 PE=1 SV=3
97	TRUE	P20702|ITAX_HUMAN	391.231	40	37	154	169	1.0974	129	185	1.43411	80	102	1.275	72	104	1.44444	139	180	1.29496	111	129	1.16216	Carbamidomethylation	127829	Integrin alpha-X OS=Homo sapiens OX=9606 GN=ITGAX PE=1 SV=3
411	TRUE	Q92888|ARHG1_HUMAN	303.311	20	20	52	57	1.09615	50	69	1.38	3	11	3.66667	7	10	1.42857	57	56	0.982456	39	57	1.46154	Carbamidomethylation	102435	Rho guanine nucleotide exchange factor 1 OS=Homo sapiens OX=9606 GN=ARHGEF1 PE=1 SV=2
598	TRUE	P78344|IF4G2_HUMAN	277.958	17	17	52	57	1.09615	54	60	1.11111	12	20	1.66667	6	21	3.5	48	60	1.25	53	48	0.90566	Carbamidomethylation	102362	Eukaryotic translation initiation factor 4 gamma 2 OS=Homo sapiens OX=9606 GN=EIF4G2 PE=1 SV=1
753	TRUE	Q7Z2K6|ERMP1_HUMAN	257.253	15	15	21	23	1.09524	24	36	1.5	4	8	2		12	12	35	49	1.4	16	49	3.0625	Carbamidomethylation	100231	Endoplasmic reticulum metallopeptidase 1 OS=Homo sapiens OX=9606 GN=ERMP1 PE=1 SV=2
727	TRUE	P61163|ACTZ_HUMAN	259.445	14	8	74	81	1.09459	63	101	1.60317	39	41	1.05128	43	50	1.16279	55	55	1	44	64	1.45455	Carbamidomethylation; Oxidation (M)	42613.7	Alpha-centractin OS=Homo sapiens OX=9606 GN=ACTR1A PE=1 SV=1
2836	FALSE	Q6XE24|RBMS3_HUMAN	65.0808	1	1	9	10	1.11111	7	7	1							5	8	1.6	2	3	1.5		47840	RNA-binding motif, single-stranded-interacting protein 3 OS=Homo sapiens OX=9606 GN=RBMS3 PE=1 SV=1
1065	TRUE	P07711|CATL1_HUMAN	227.082	10	10	32	35	1.09375	20	41	2.05	15	42	2.8	9	46	5.11111	22	39	1.77273	31	39	1.25806	Carbamidomethylation; Oxidation (M)	37564.1	Procathepsin L OS=Homo sapiens OX=9606 GN=CTSL PE=1 SV=2
662	TRUE	O43390|HNRPR_HUMAN	267.589	16	13	32	35	1.09375	52	42	0.807692	43	20	0.465116	33	23	0.69697	33	29	0.878788	33	35	1.06061	Carbamidomethylation	70943.1	Heterogeneous nuclear ribonucleoprotein R OS=Homo sapiens OX=9606 GN=HNRNPR PE=1 SV=1
156	FALSE	Q9C0K3|ARP3C_HUMAN	124.008	2	2	65	71	1.09231	49	52	1.06122	74	59	0.797297	71	74	1.04225	25	36	1.44	90	40	0.444444		23712.3	Actin-related protein 3C OS=Homo sapiens OX=9606 GN=ACTR3C PE=2 SV=1
1583	TRUE	O75122|CLAP2_HUMAN	182.865	8	8	11	12	1.09091	8	15	1.875							9	9	1	3	18	6	Carbamidomethylation	141064	CLIP-associating protein 2 OS=Homo sapiens OX=9606 GN=CLASP2 PE=1 SV=3
137	TRUE	O75923|DYSF_HUMAN	373.402	48	45	88	96	1.09091	196	231	1.17857	5	9	1.8	11	15	1.36364	138	146	1.05797	138	172	1.24638	Carbamidomethylation	237295	Dysferlin OS=Homo sapiens OX=9606 GN=DYSF PE=1 SV=1
2471	TRUE	P68431|H31_HUMAN	118.364	4	1	9	5	0.555556	6	8	1.33333					1	1	4	5	1.25	4	6	1.5	Carbamidomethylation	15404.1	Histone H3.1 OS=Homo sapiens OX=9606 GN=H3C1 PE=1 SV=2
146	TRUE	P36776|LONM_HUMAN	370.668	37	37	110	120	1.09091	129	145	1.12403	71	45	0.633803	33	29	0.878788	141	130	0.921986	151	158	1.04636	Carbamidomethylation; Oxidation (M)	106489	Lon protease homolog, mitochondrial OS=Homo sapiens OX=9606 GN=LONP1 PE=1 SV=2
2033	TRUE	Q8IY95|TM192_HUMAN	149.985	3	3	11	12	1.09091	11	8	0.727273	1	8	8	9	21	2.33333	11	11	1	11	10	0.909091	Carbamidomethylation	30922.3	Transmembrane protein 192 OS=Homo sapiens OX=9606 GN=TMEM192 PE=1 SV=1
1340	TRUE	P62280|RS11_HUMAN	202.84	8	8	44	48	1.09091	40	41	1.025	43	33	0.767442	7	38	5.42857	18	22	1.22222	25	21	0.84	Carbamidomethylation	18430.7	40S ribosomal protein S11 OS=Homo sapiens OX=9606 GN=RPS11 PE=1 SV=3
331	TRUE	O94925|GLSK_HUMAN	320.714	20	20	88	96	1.09091	77	64	0.831169	50	61	1.22	14	21	1.5	76	110	1.44737	72	60	0.833333	Carbamidomethylation; Oxidation (M)	73461.1	Glutaminase kidney isoform, mitochondrial OS=Homo sapiens OX=9606 GN=GLS PE=1 SV=1
84	TRUE	P53396|ACLY_HUMAN	399.09	38	38	233	254	1.09013	241	251	1.04149	107	123	1.14953	110	136	1.23636	127	154	1.2126	131	141	1.07634	Carbamidomethylation; Oxidation (M)	120839	ATP-citrate synthase OS=Homo sapiens OX=9606 GN=ACLY PE=1 SV=3
539	TRUE	A0MZ66|SHOT1_HUMAN	285.335	19	19	78	85	1.08974	80	83	1.0375	56	50	0.892857	76	56	0.736842	69	60	0.869565	60	53	0.883333	Oxidation (M); Carbamidomethylation	71639.9	Shootin-1 OS=Homo sapiens OX=9606 GN=SHTN1 PE=1 SV=4
3029	TRUE	Q6ZWB6|KCTD8_HUMAN	83.3593	2	1	9	5	0.555556	3	5	1.66667	1	3	3	8	4	0.5	5	6	1.2	4	6	1.5	Carbamidomethylation	52439.8	BTB/POZ domain-containing protein KCTD8 OS=Homo sapiens OX=9606 GN=KCTD8 PE=1 SV=1
577	TRUE	Q9UI08|EVL_HUMAN	280.154	17	17	67	73	1.08955	60	62	1.03333	21	20	0.952381	21	20	0.952381	62	54	0.870968	62	53	0.854839	Oxidation (M)	44619.8	Ena/VASP-like protein OS=Homo sapiens OX=9606 GN=EVL PE=1 SV=2
245	TRUE	Q9Y5S1|TRPV2_HUMAN	337.914	22	22	124	135	1.08871	88	121	1.375	143	128	0.895105	20	89	4.45	138	152	1.10145	107	124	1.15888	Carbamidomethylation; Oxidation (M)	85981.1	Transient receptor potential cation channel subfamily V member 2 OS=Homo sapiens OX=9606 GN=TRPV2 PE=1 SV=1
560	TRUE	Q6PGP7|TTC37_HUMAN	282.211	24	24	34	37	1.08824	27	53	1.96296	1				3	3	28	33	1.17857	14	18	1.28571	Carbamidomethylation	175486	Tetratricopeptide repeat protein 37 OS=Homo sapiens OX=9606 GN=TTC37 PE=1 SV=1
657	TRUE	P62195|PRS8_HUMAN	268.454	12	11	34	37	1.08824	49	57	1.16327	20	19	0.95	15	14	0.933333	41	32	0.780488	47	41	0.87234	Carbamidomethylation	45626	26S proteasome regulatory subunit 8 OS=Homo sapiens OX=9606 GN=PSMC5 PE=1 SV=1
860	TRUE	O43815|STRN_HUMAN	247.558	14	14	23	25	1.08696	16	38	2.375				3	5	1.66667	21	39	1.85714	20	40	2	Carbamidomethylation	86132.1	Striatin OS=Homo sapiens OX=9606 GN=STRN PE=1 SV=4
688	TRUE	O95202|LETM1_HUMAN	264.222	17	17	46	50	1.08696	46	34	0.73913	15	3	0.2	6	3	0.5	60	53	0.883333	43	66	1.53488	Carbamidomethylation	83354.2	Mitochondrial proton/calcium exchanger protein OS=Homo sapiens OX=9606 GN=LETM1 PE=1 SV=1
1841	TRUE	P62249|RS16_HUMAN	162.554	5	5	23	25	1.08696	30	22	0.733333	22	24	1.09091	19	18	0.947368	10	8	0.8	11	7	0.636364		16445.3	40S ribosomal protein S16 OS=Homo sapiens OX=9606 GN=RPS16 PE=1 SV=2
1046	TRUE	P48449|LSS_HUMAN	228.514	13	13	35	38	1.08571	24	41	1.70833		3	3	1	4	4	23	29	1.26087	15	17	1.13333	Carbamidomethylation	83308.7	Lanosterol synthase OS=Homo sapiens OX=9606 GN=LSS PE=1 SV=1
689	TRUE	Q15019|SEPT2_HUMAN	264.022	13	12	47	51	1.08511	42	56	1.33333	51	73	1.43137	38	62	1.63158	26	33	1.26923	29	31	1.06897	Carbamidomethylation	41487.5	Septin-2 OS=Homo sapiens OX=9606 GN=SEPTIN2 PE=1 SV=1
179	TRUE	Q16555|DPYL2_HUMAN	357.599	28	26	165	179	1.08485	154	142	0.922078	105	101	0.961905	82	84	1.02439	141	154	1.0922	121	114	0.942149	Carbamidomethylation; Oxidation (M)	62293.6	Dihydropyrimidinase-related protein 2 OS=Homo sapiens OX=9606 GN=DPYSL2 PE=1 SV=1
50	TRUE	P07814|SYEP_HUMAN	427.356	61	61	332	360	1.08434	325	367	1.12923	135	119	0.881481	94	149	1.58511	256	254	0.992188	266	292	1.09774	Oxidation (M); Carbamidomethylation	170591	Bifunctional glutamate/proline--tRNA ligase OS=Homo sapiens OX=9606 GN=EPRS1 PE=1 SV=5
439	TRUE	O00299|CLIC1_HUMAN	299.364	15	14	107	116	1.08411	110	121	1.1	106	119	1.12264	57	106	1.85965	100	93	0.93	101	108	1.06931	Carbamidomethylation; Oxidation (M)	26922.7	Chloride intracellular channel protein 1 OS=Homo sapiens OX=9606 GN=CLIC1 PE=1 SV=4
2126	TRUE	Q9H3N1|TMX1_HUMAN	144.046	4	4	12	13	1.08333	17	13	0.764706	8	4	0.5	4	8	2	1	1	1	1	3	3	Carbamidomethylation	31791.2	Thioredoxin-related transmembrane protein 1 OS=Homo sapiens OX=9606 GN=TMX1 PE=1 SV=1
1261	TRUE	P55010|IF5_HUMAN	208.349	11	11	24	26	1.08333	25	28	1.12	20	30	1.5	13	15	1.15385	19	20	1.05263	14	20	1.42857	Carbamidomethylation	49222.7	Eukaryotic translation initiation factor 5 OS=Homo sapiens OX=9606 GN=EIF5 PE=1 SV=2
2357	TRUE	P61077|UB2D3_HUMAN	126.646	2	1	8	12	1.5	12	8	0.666667	3	4	1.33333	3	5	1.66667	9	8	0.888889	8	12	1.5	Carbamidomethylation	16687.2	Ubiquitin-conjugating enzyme E2 D3 OS=Homo sapiens OX=9606 GN=UBE2D3 PE=1 SV=1
2357	TRUE	P62837|UB2D2_HUMAN	126.646	2	1	8	12	1.5	12	8	0.666667	3	4	1.33333	3	5	1.66667	9	8	0.888889	8	12	1.5	Carbamidomethylation	16735.2	Ubiquitin-conjugating enzyme E2 D2 OS=Homo sapiens OX=9606 GN=UBE2D2 PE=1 SV=1
1420	FALSE	Q8IZP2|ST134_HUMAN	168.529	4	4	24	26	1.08333	17	23	1.35294	17	12	0.705882	11	22	2	20	23	1.15	15	21	1.4	Carbamidomethylation	27406.8	Putative protein FAM10A4 OS=Homo sapiens OX=9606 GN=ST13P4 PE=5 SV=1
1285	TRUE	P37235|HPCL1_HUMAN	206.465	7	7	12	13	1.08333	18	18	1	30	47	1.56667	39	45	1.15385	17	34	2	18	16	0.888889		22313.2	Hippocalcin-like protein 1 OS=Homo sapiens OX=9606 GN=HPCAL1 PE=1 SV=3
1339	TRUE	P22694|KAPCB_HUMAN	202.889	9	4	24	26	1.08333	10	19	1.9	15	5	0.333333	6	4	0.666667	23	18	0.782609	19	15	0.789474	Carbamidomethylation	40622.7	cAMP-dependent protein kinase catalytic subunit beta OS=Homo sapiens OX=9606 GN=PRKACB PE=1 SV=2
817	FALSE	P29803|ODPAT_HUMAN	155.027	4	4	12	13	1.08333	11	13	1.18182	9	14	1.55556	11	7	0.636364	12	19	1.58333	16	12	0.75	Oxidation (M)	42933.2	Pyruvate dehydrogenase E1 component subunit alpha, testis-specific form, mitochondrial OS=Homo sapiens OX=9606 GN=PDHA2 PE=1 SV=1
1484	TRUE	P63220|RS21_HUMAN	191.228	4	4	12	13	1.08333	14	17	1.21429	7	4	0.571429	10	7	0.7	7	3	0.428571	3	2	0.666667	Oxidation (M); Carbamidomethylation	9111.37	40S ribosomal protein S21 OS=Homo sapiens OX=9606 GN=RPS21 PE=1 SV=1
90	TRUE	P25705|ATPA_HUMAN	395.873	24	24	182	197	1.08242	173	196	1.13295	191	167	0.874346	206	181	0.878641	246	272	1.10569	253	256	1.01186	Oxidation (M); Carbamidomethylation	59750.6	ATP synthase subunit alpha, mitochondrial OS=Homo sapiens OX=9606 GN=ATP5F1A PE=1 SV=1
169	TRUE	Q92608|DOCK2_HUMAN	360.833	41	40	98	106	1.08163	132	178	1.34848	21	34	1.61905	25	102	4.08	57	69	1.21053	52	69	1.32692	Carbamidomethylation	211948	Dedicator of cytokinesis protein 2 OS=Homo sapiens OX=9606 GN=DOCK2 PE=1 SV=2
1886	TRUE	Q8IWZ3|ANKH1_HUMAN	160.04	5	1	19	16	0.842105	14	19	1.35714							10	8	0.8	4	6	1.5	Carbamidomethylation	269458	Ankyrin repeat and KH domain-containing protein 1 OS=Homo sapiens OX=9606 GN=ANKHD1 PE=1 SV=1
1060	TRUE	P62753|RS6_HUMAN	227.35	6	6	111	120	1.08108	111	94	0.846847	45	58	1.28889	36	50	1.38889	53	69	1.30189	56	60	1.07143	Carbamidomethylation; Oxidation (M)	28680.6	40S ribosomal protein S6 OS=Homo sapiens OX=9606 GN=RPS6 PE=1 SV=1
109	TRUE	O00763|ACACB_HUMAN	384.425	44	29	138	149	1.07971	111	101	0.90991	109	76	0.697248	56	68	1.21429	318	329	1.03459	298	228	0.765101	Oxidation (M); Carbamidomethylation	276541	Acetyl-CoA carboxylase 2 OS=Homo sapiens OX=9606 GN=ACACB PE=1 SV=3
1089	TRUE	P16401|H15_HUMAN	223.953	7	7	63	68	1.07937	99	70	0.707071	70	47	0.671429	74	60	0.810811	43	42	0.976744	55	48	0.872727		22580.2	Histone H1.5 OS=Homo sapiens OX=9606 GN=H1-5 PE=1 SV=3
298	TRUE	Q01813|PFKAP_HUMAN	325.6	23	20	102	110	1.07843	108	119	1.10185	51	47	0.921569	59	47	0.79661	77	78	1.01299	84	85	1.0119	Oxidation (M); Carbamidomethylation	85596.1	ATP-dependent 6-phosphofructokinase, platelet type OS=Homo sapiens OX=9606 GN=PFKP PE=1 SV=2
230	TRUE	P02545|LMNA_HUMAN	343.605	26	25	166	179	1.07831	185	159	0.859459	129	69	0.534884	109	75	0.688073	101	124	1.22772	119	122	1.02521	Carbamidomethylation; Oxidation (M)	74139.5	Prelamin-A/C OS=Homo sapiens OX=9606 GN=LMNA PE=1 SV=1
516	TRUE	Q9BTU6|P4K2A_HUMAN	289.847	20	20	64	69	1.07812	63	86	1.36508	41	45	1.09756	43	58	1.34884	75	71	0.946667	64	72	1.125	Carbamidomethylation	54022.4	Phosphatidylinositol 4-kinase type 2-alpha OS=Homo sapiens OX=9606 GN=PI4K2A PE=1 SV=1
355	TRUE	O15144|ARPC2_HUMAN	313.244	19	19	129	139	1.07752	130	95	0.730769	149	101	0.677852	102	111	1.08824	84	85	1.0119	90	107	1.18889	Oxidation (M); Carbamidomethylation	34333	Actin-related protein 2/3 complex subunit 2 OS=Homo sapiens OX=9606 GN=ARPC2 PE=1 SV=1
61	TRUE	P07858|CATB_HUMAN	411.883	35	35	207	223	1.07729	389	329	0.845758	191	207	1.08377	116	310	2.67241	125	137	1.096	125	184	1.472	Carbamidomethylation; Oxidation (M)	37821.6	Cathepsin B OS=Homo sapiens OX=9606 GN=CTSB PE=1 SV=3
681	TRUE	P52306|GDS1_HUMAN	264.952	15	15	39	42	1.07692	29	32	1.10345	23	42	1.82609	1	18	18	28	33	1.17857	7	16	2.28571	Carbamidomethylation; Oxidation (M)	66316.8	Rap1 GTPase-GDP dissociation stimulator 1 OS=Homo sapiens OX=9606 GN=RAP1GDS1 PE=1 SV=3
1688	TRUE	Q14914|PTGR1_HUMAN	173.596	7	7	13	14	1.07692	15	14	0.933333	10	6	0.6	3	9	3	20	15	0.75	15	19	1.26667	Carbamidomethylation; Oxidation (M)	35869.8	Prostaglandin reductase 1 OS=Homo sapiens OX=9606 GN=PTGR1 PE=1 SV=2
2338	TRUE	Q9H267|VP33B_HUMAN	128.442	3	3	13	14	1.07692	13	14	1.07692	6	1	0.166667	5	11	2.2	10	9	0.9	13	6	0.461538		70585.3	Vacuolar protein sorting-associated protein 33B OS=Homo sapiens OX=9606 GN=VPS33B PE=1 SV=2
1964	FALSE	Q86SE5|RALYL_HUMAN	59.9363	1	1	3	2	0.666667	2	4	2	5	5	1	6	4	0.666667	7	4	0.571429	2	3	1.5		32330.5	RNA-binding Raly-like protein OS=Homo sapiens OX=9606 GN=RALYL PE=1 SV=2
134	TRUE	P04083|ANXA1_HUMAN	374.48	22	22	157	169	1.07643	160	188	1.175	220	191	0.868182	166	197	1.18675	156	160	1.02564	162	159	0.981481	Carbamidomethylation; Oxidation (M)	38714.2	Annexin A1 OS=Homo sapiens OX=9606 GN=ANXA1 PE=1 SV=2
1026	TRUE	P18085|ARF4_HUMAN	229.895	9	5	105	113	1.07619	95	96	1.01053	79	77	0.974684	62	87	1.40323	72	78	1.08333	78	75	0.961538	Oxidation (M); Carbamidomethylation	20510.8	ADP-ribosylation factor 4 OS=Homo sapiens OX=9606 GN=ARF4 PE=1 SV=3
543	TRUE	P53992|SC24C_HUMAN	284.58	17	17	66	71	1.07576	76	81	1.06579	21	14	0.666667	1	14	14	54	53	0.981481	42	53	1.2619	Carbamidomethylation	118325	Protein transport protein Sec24C OS=Homo sapiens OX=9606 GN=SEC24C PE=1 SV=3
131	TRUE	Q9NY65|TBA8_HUMAN	376.549	30	2	306	329	1.07516	301	327	1.08638	340	331	0.973529	227	309	1.36123	433	509	1.17552	347	371	1.06916	Carbamidomethylation; Oxidation (M)	50093.5	Tubulin alpha-8 chain OS=Homo sapiens OX=9606 GN=TUBA8 PE=1 SV=1
637	TRUE	Q9Y4G6|TLN2_HUMAN	271.975	15	5	80	86	1.075	87	78	0.896552	39	35	0.897436	54	40	0.740741	56	65	1.16071	63	66	1.04762	Carbamidomethylation; Oxidation (M)	271613	Talin-2 OS=Homo sapiens OX=9606 GN=TLN2 PE=1 SV=4
3141	TRUE	P39210|MPV17_HUMAN	76.6899	1	1	3	2	0.666667	8									4			4	6	1.5		19733.2	Protein Mpv17 OS=Homo sapiens OX=9606 GN=MPV17 PE=1 SV=1
333	TRUE	Q15029|U5S1_HUMAN	319.938	24	24	67	72	1.07463	71	86	1.21127	23	15	0.652174	16	19	1.1875	57	66	1.15789	30	62	2.06667	Carbamidomethylation	109436	116 kDa U5 small nuclear ribonucleoprotein component OS=Homo sapiens OX=9606 GN=EFTUD2 PE=1 SV=1
892	TRUE	P61204|ARF3_HUMAN	243.862	9	5	121	130	1.07438	122	110	0.901639	86	89	1.03488	98	107	1.09184	119	118	0.991597	142	131	0.922535	Oxidation (M)	20600.8	ADP-ribosylation factor 3 OS=Homo sapiens OX=9606 GN=ARF3 PE=1 SV=2
892	TRUE	P84077|ARF1_HUMAN	243.862	9	5	121	130	1.07438	122	110	0.901639	86	89	1.03488	98	107	1.09184	119	118	0.991597	142	131	0.922535	Oxidation (M)	20696.8	ADP-ribosylation factor 1 OS=Homo sapiens OX=9606 GN=ARF1 PE=1 SV=2
1201	TRUE	Q15233|NONO_HUMAN	214.079	10	10	27	29	1.07407	32	57	1.78125	14	23	1.64286	6	36	6	2	18	9	8	29	3.625	Carbamidomethylation; Oxidation (M)	54231.5	Non-POU domain-containing octamer-binding protein OS=Homo sapiens OX=9606 GN=NONO PE=1 SV=4
725	TRUE	O60784|TOM1_HUMAN	259.634	11	11	27	29	1.07407	26	54	2.07692	3	15	5	4	18	4.5	26	25	0.961538	26	42	1.61538		53818.4	Target of Myb protein 1 OS=Homo sapiens OX=9606 GN=TOM1 PE=1 SV=2
1812	TRUE	P62277|RS13_HUMAN	164.449	4	4	27	29	1.07407	27	25	0.925926	17	14	0.823529	35	26	0.742857	15	19	1.26667	15	11	0.733333		17222.3	40S ribosomal protein S13 OS=Homo sapiens OX=9606 GN=RPS13 PE=1 SV=2
718	TRUE	P33897|ABCD1_HUMAN	260.407	13	13	41	44	1.07317	49	56	1.14286	19	21	1.10526	11	17	1.54545	25	40	1.6	31	42	1.35484		82936.9	ATP-binding cassette sub-family D member 1 OS=Homo sapiens OX=9606 GN=ABCD1 PE=1 SV=2
223	FALSE	P30154|2AAB_HUMAN	215.877	6	6	42	45	1.07143	45	52	1.15556	60	58	0.966667	29	57	1.96552	48	35	0.729167	42	48	1.14286	Carbamidomethylation	66213.5	Serine/threonine-protein phosphatase 2A 65 kDa regulatory subunit A beta isoform OS=Homo sapiens OX=9606 GN=PPP2R1B PE=1 SV=3
1789	TRUE	O75348|VATG1_HUMAN	165.75	4	4	14	15	1.07143	18	14	0.777778	14	19	1.35714	14	19	1.35714	13	12	0.923077	17	15	0.882353	Carbamidomethylation; Oxidation (M)	13757.5	V-type proton ATPase subunit G 1 OS=Homo sapiens OX=9606 GN=ATP6V1G1 PE=1 SV=3
205	FALSE	Q9ULD0|OGDHL_HUMAN	194.579	6	6	14	15	1.07143	17	18	1.05882	8	8	1	1	4	4	18	24	1.33333	15	6	0.4	Carbamidomethylation	114481	2-oxoglutarate dehydrogenase-like, mitochondrial OS=Homo sapiens OX=9606 GN=OGDHL PE=1 SV=3
342	TRUE	Q9NSE4|SYIM_HUMAN	317.043	26	26	99	106	1.07071	92	67	0.728261	28	23	0.821429	26	20	0.769231	76	83	1.09211	91	61	0.67033	Carbamidomethylation	113792	Isoleucine--tRNA ligase, mitochondrial OS=Homo sapiens OX=9606 GN=IARS2 PE=1 SV=2
1478	TRUE	O15260|SURF4_HUMAN	191.843	5	5	43	46	1.06977	43	45	1.04651	48	59	1.22917	30	71	2.36667	30	54	1.8	45	59	1.31111	Oxidation (M); Carbamidomethylation	30394	Surfeit locus protein 4 OS=Homo sapiens OX=9606 GN=SURF4 PE=1 SV=3
79	TRUE	P29401|TKT_HUMAN	402.698	38	38	289	309	1.0692	320	333	1.04062	191	183	0.958115	219	227	1.03653	320	245	0.765625	248	276	1.1129	Carbamidomethylation; Oxidation (M)	67877.6	Transketolase OS=Homo sapiens OX=9606 GN=TKT PE=1 SV=3
854	TRUE	Q9H7D0|DOCK5_HUMAN	247.981	22	21	29	31	1.06897	49	57	1.16327					1	1	12	17	1.41667	18	19	1.05556	Carbamidomethylation	215309	Dedicator of cytokinesis protein 5 OS=Homo sapiens OX=9606 GN=DOCK5 PE=1 SV=3
788	TRUE	Q00013|EM55_HUMAN	254.026	13	13	29	31	1.06897	29	64	2.2069	21	25	1.19048	19	29	1.52632	25	32	1.28	31	27	0.870968	Oxidation (M); Carbamidomethylation	52296.5	55 kDa erythrocyte membrane protein OS=Homo sapiens OX=9606 GN=MPP1 PE=1 SV=2
250	TRUE	P62873|GBB1_HUMAN	337.004	16	10	73	78	1.06849	76	102	1.34211	124	123	0.991935	25	129	5.16	135	108	0.8	110	128	1.16364	Carbamidomethylation; Oxidation (M)	37377	Guanine nucleotide-binding protein G(I)/G(S)/G(T) subunit beta-1 OS=Homo sapiens OX=9606 GN=GNB1 PE=1 SV=3
676	TRUE	P35232|PHB_HUMAN	265.724	14	14	59	63	1.0678	71	57	0.802817	46	47	1.02174	50	46	0.92	47	60	1.2766	63	59	0.936508	Carbamidomethylation	29804.1	Prohibitin OS=Homo sapiens OX=9606 GN=PHB PE=1 SV=1
1420	TRUE	P50502|F10A1_HUMAN	196.805	6	6	30	32	1.06667	22	26	1.18182	31	20	0.645161	23	32	1.3913	23	32	1.3913	19	26	1.36842	Oxidation (M); Carbamidomethylation	41331.7	Hsc70-interacting protein OS=Homo sapiens OX=9606 GN=ST13 PE=1 SV=2
1033	TRUE	P61019|RAB2A_HUMAN	229.193	9	3	30	32	1.06667	37	36	0.972973	28	26	0.928571	36	26	0.722222	23	28	1.21739	29	27	0.931034	Carbamidomethylation	23545.5	Ras-related protein Rab-2A OS=Homo sapiens OX=9606 GN=RAB2A PE=1 SV=1
37	FALSE	P41219|PERI_HUMAN	148.62	3	2	169	180	1.06509	184	185	1.00543	170	189	1.11176	217	159	0.732719	167	163	0.976048	179	189	1.05587	Oxidation (M)	53650.9	Peripherin OS=Homo sapiens OX=9606 GN=PRPH PE=1 SV=2
193	TRUE	P13010|XRCC5_HUMAN	353.411	32	32	108	115	1.06481	109	113	1.0367	87	62	0.712644	73	62	0.849315	147	166	1.12925	122	154	1.2623	Oxidation (M); Carbamidomethylation	82704.5	X-ray repair cross-complementing protein 5 OS=Homo sapiens OX=9606 GN=XRCC5 PE=1 SV=3
113	TRUE	P34932|HSP74_HUMAN	383.183	37	34	202	215	1.06436	214	202	0.943925	149	125	0.838926	121	115	0.950413	217	202	0.930876	170	192	1.12941	Oxidation (M); Carbamidomethylation	94330.9	Heat shock 70 kDa protein 4 OS=Homo sapiens OX=9606 GN=HSPA4 PE=1 SV=4
188	TRUE	P18206|VINC_HUMAN	354.301	35	35	140	149	1.06429	140	124	0.885714	102	58	0.568627	42	39	0.928571	91	96	1.05495	97	86	0.886598	Carbamidomethylation; Oxidation (M)	123799	Vinculin OS=Homo sapiens OX=9606 GN=VCL PE=1 SV=4
3	TRUE	Q09666|AHNK_HUMAN	583.874	218	218	1899	2021	1.06424	1810	1602	0.885083	960	540	0.5625	757	774	1.02246	735	1088	1.48027	1010	851	0.842574	Oxidation (M); Carbamidomethylation	629101	Neuroblast differentiation-associated protein AHNAK OS=Homo sapiens OX=9606 GN=AHNAK PE=1 SV=2
15	TRUE	Q96RQ3|MCCA_HUMAN	534.858	66	66	2273	2418	1.06379	2189	1732	0.791229	854	657	0.769321	695	614	0.883453	3164	3001	0.948483	3524	3318	0.941544	Oxidation (M); Carbamidomethylation	80473	Methylcrotonoyl-CoA carboxylase subunit alpha, mitochondrial OS=Homo sapiens OX=9606 GN=MCCC1 PE=1 SV=3
2050	TRUE	P30536|TSPO_HUMAN	148.726	6	6	32	34	1.0625	41	36	0.878049	3	6	2		4	4	10	6	0.6		7	7	Oxidation (M); Carbamidomethylation	18827.9	Translocator protein OS=Homo sapiens OX=9606 GN=TSPO PE=1 SV=3
1092	TRUE	P42025|ACTY_HUMAN	223.753	10	4	16	17	1.0625	18	28	1.55556	3	3	1	6	6	1	22	36	1.63636	18	32	1.77778	Oxidation (M); Carbamidomethylation	42293.4	Beta-centractin OS=Homo sapiens OX=9606 GN=ACTR1B PE=1 SV=1
1269	TRUE	Q15738|NSDHL_HUMAN	207.574	8	8	16	17	1.0625	12	15	1.25		6	6		3	3	22	17	0.772727	9	16	1.77778	Carbamidomethylation	41900.3	Sterol-4-alpha-carboxylate 3-dehydrogenase, decarboxylating OS=Homo sapiens OX=9606 GN=NSDHL PE=1 SV=2
1356	TRUE	Q96A33|CCD47_HUMAN	201.554	8	8	16	17	1.0625	17	26	1.52941	8	5	0.625	3	5	1.66667	12	12	1	17	22	1.29412	Carbamidomethylation	55873.8	Coiled-coil domain-containing protein 47 OS=Homo sapiens OX=9606 GN=CCDC47 PE=1 SV=1
1163	TRUE	P67775|PP2AA_HUMAN	217.702	9	1	39	36	0.923077	33	27	0.818182	15	13	0.866667	11	21	1.90909	37	29	0.783784	20	29	1.45	Carbamidomethylation; Oxidation (M)	35594.2	Serine/threonine-protein phosphatase 2A catalytic subunit alpha isoform OS=Homo sapiens OX=9606 GN=PPP2CA PE=1 SV=1
1801	TRUE	P19013|K2C4_HUMAN	164.899	5	1	17	36	2.11765	94	15	0.159574	13	5	0.384615	18	5	0.277778	19	13	0.684211	20	29	1.45		56144	Keratin, type II cytoskeletal 4 OS=Homo sapiens OX=9606 GN=KRT4 PE=1 SV=5
339	TRUE	P31930|QCR1_HUMAN	317.703	19	19	80	85	1.0625	82	84	1.02439	68	54	0.794118	28	62	2.21429	87	100	1.14943	91	99	1.08791	Carbamidomethylation	52645.8	Cytochrome b-c1 complex subunit 1, mitochondrial OS=Homo sapiens OX=9606 GN=UQCRC1 PE=1 SV=3
1400	TRUE	P61020|RAB5B_HUMAN	198.083	6	3	16	17	1.0625	23	22	0.956522	15	11	0.733333	6	10	1.66667	24	24	1	29	30	1.03448	Oxidation (M)	23706.8	Ras-related protein Rab-5B OS=Homo sapiens OX=9606 GN=RAB5B PE=1 SV=1
843	TRUE	Q12979|ABR_HUMAN	249.096	20	20	33	35	1.06061	36	55	1.52778	3	1	0.333333	2	11	5.5	46	40	0.869565	29	44	1.51724	Carbamidomethylation	97597.8	Active breakpoint cluster region-related protein OS=Homo sapiens OX=9606 GN=ABR PE=1 SV=2
461	TRUE	Q15046|SYK_HUMAN	296.309	17	17	50	53	1.06	81	101	1.24691	52	70	1.34615	55	65	1.18182	73	64	0.876712	68	70	1.02941	Carbamidomethylation; Oxidation (M)	68048.1	Lysine--tRNA ligase OS=Homo sapiens OX=9606 GN=KARS1 PE=1 SV=3
122	TRUE	Q8NF50|DOCK8_HUMAN	379.335	53	50	117	124	1.05983	159	244	1.53459	10	10	1	3	36	12	62	64	1.03226	54	76	1.40741	Carbamidomethylation; Oxidation (M)	238529	Dedicator of cytokinesis protein 8 OS=Homo sapiens OX=9606 GN=DOCK8 PE=1 SV=3
465	TRUE	P31946|1433B_HUMAN	295.504	14	10	251	266	1.05976	188	227	1.20745	166	124	0.746988	147	142	0.965986	131	129	0.984733	122	93	0.762295	Oxidation (M); Carbamidomethylation	28082.4	14-3-3 protein beta/alpha OS=Homo sapiens OX=9606 GN=YWHAB PE=1 SV=3
523	TRUE	P18031|PTN1_HUMAN	287.558	17	16	67	71	1.0597	59	71	1.20339	67	48	0.716418	54	68	1.25926	49	53	1.08163	64	63	0.984375	Carbamidomethylation; Oxidation (M)	49966.8	Tyrosine-protein phosphatase non-receptor type 1 OS=Homo sapiens OX=9606 GN=PTPN1 PE=1 SV=1
156	FALSE	Q9P1U1|ARP3B_HUMAN	138.555	3	3	67	71	1.0597	50	52	1.04	74	59	0.797297	71	74	1.04225	27	36	1.33333	90	40	0.444444		47607.7	Actin-related protein 3B OS=Homo sapiens OX=9606 GN=ACTR3B PE=2 SV=1
977	TRUE	Q9H0D6|XRN2_HUMAN	234.91	13	13	34	36	1.05882	25	42	1.68	3	10	3.33333	8	22	2.75	17	22	1.29412	9	30	3.33333	Carbamidomethylation	108582	5'-3' exoribonuclease 2 OS=Homo sapiens OX=9606 GN=XRN2 PE=1 SV=1
1380	TRUE	Q14789|GOGB1_HUMAN	199.514	19	19	17	18	1.05882	18	19	1.05556							2	8	4	6	9	1.5	Carbamidomethylation	376019	Golgin subfamily B member 1 OS=Homo sapiens OX=9606 GN=GOLGB1 PE=1 SV=2
1507	TRUE	Q14155|ARHG7_HUMAN	189.557	9	5	17	18	1.05882	17	20	1.17647							17	24	1.41176	11	15	1.36364		90012.1	Rho guanine nucleotide exchange factor 7 OS=Homo sapiens OX=9606 GN=ARHGEF7 PE=1 SV=2
696	TRUE	P23786|CPT2_HUMAN	262.773	14	14	34	36	1.05882	33	42	1.27273	30	31	1.03333	4	18	4.5	51	49	0.960784	50	65	1.3	Carbamidomethylation	73777	Carnitine O-palmitoyltransferase 2, mitochondrial OS=Homo sapiens OX=9606 GN=CPT2 PE=1 SV=2
759	TRUE	O75694|NU155_HUMAN	256.33	16	16	34	36	1.05882	32	36	1.125	2	1	0.5		1	1	18	25	1.38889	10	12	1.2	Carbamidomethylation	155199	Nuclear pore complex protein Nup155 OS=Homo sapiens OX=9606 GN=NUP155 PE=1 SV=1
502	TRUE	P50993|AT1A2_HUMAN	291.524	14	1	115	130	1.13043	82	156	1.90244	88	90	1.02273	64	85	1.32812	96	138	1.4375	81	116	1.4321	Carbamidomethylation; Oxidation (M)	112265	Sodium/potassium-transporting ATPase subunit alpha-2 OS=Homo sapiens OX=9606 GN=ATP1A2 PE=1 SV=1
1253	TRUE	P20936|RASA1_HUMAN	208.981	11	11	17	18	1.05882	12	12	1	2	1	0.5	1			13	16	1.23077	14	16	1.14286	Carbamidomethylation	116403	Ras GTPase-activating protein 1 OS=Homo sapiens OX=9606 GN=RASA1 PE=1 SV=1
11	TRUE	Q00610|CLH1_HUMAN	547.1	122	122	952	1008	1.05882	1061	1068	1.0066	563	454	0.806394	430	526	1.22326	782	713	0.911765	692	778	1.12428	Oxidation (M); Carbamidomethylation	191615	Clathrin heavy chain 1 OS=Homo sapiens OX=9606 GN=CLTC PE=1 SV=5
1388	TRUE	O60701|UGDH_HUMAN	198.704	8	8	17	18	1.05882	18	20	1.11111	11	4	0.363636	2			10	7	0.7	6	4	0.666667		55024.1	UDP-glucose 6-dehydrogenase OS=Homo sapiens OX=9606 GN=UGDH PE=1 SV=1
42	TRUE	P14625|ENPL_HUMAN	434.012	45	43	325	344	1.05846	358	299	0.835196	222	170	0.765766	183	142	0.775956	375	354	0.944	358	364	1.01676	Oxidation (M); Carbamidomethylation	92468.9	Endoplasmin OS=Homo sapiens OX=9606 GN=HSP90B1 PE=1 SV=1
32	TRUE	P49327|FAS_HUMAN	454.945	76	76	311	329	1.05788	296	302	1.02027	56	31	0.553571	14	33	2.35714	238	239	1.0042	134	166	1.23881	Carbamidomethylation	273427	Fatty acid synthase OS=Homo sapiens OX=9606 GN=FASN PE=1 SV=3
329	TRUE	P11216|PYGB_HUMAN	320.788	26	20	87	92	1.05747	81	93	1.14815	29	47	1.62069	46	50	1.08696	59	72	1.22034	64	83	1.29688	Carbamidomethylation; Oxidation (M)	96695.9	Glycogen phosphorylase, brain form OS=Homo sapiens OX=9606 GN=PYGB PE=1 SV=5
493	TRUE	P31040|SDHA_HUMAN	292.745	21	21	35	37	1.05714	49	69	1.40816	30	31	1.03333	10	34	3.4	29	30	1.03448	25	34	1.36	Carbamidomethylation; Oxidation (M)	72691.5	Succinate dehydrogenase [ubiquinone] flavoprotein subunit, mitochondrial OS=Homo sapiens OX=9606 GN=SDHA PE=1 SV=2
762	TRUE	Q8TAT6|NPL4_HUMAN	256.2	12	12	35	37	1.05714	40	46	1.15	2	15	7.5	2	24	12	23	34	1.47826	32	40	1.25	Carbamidomethylation	68120.2	Nuclear protein localization protein 4 homolog OS=Homo sapiens OX=9606 GN=NPLOC4 PE=1 SV=3
463	TRUE	P09525|ANXA4_HUMAN	296.279	17	16	88	93	1.05682	84	86	1.02381	107	101	0.943925	115	97	0.843478	58	64	1.10345	63	68	1.07937	Oxidation (M); Carbamidomethylation	35882.7	Annexin A4 OS=Homo sapiens OX=9606 GN=ANXA4 PE=1 SV=4
441	TRUE	Q99541|PLIN2_HUMAN	298.846	13	13	71	75	1.05634	43	62	1.44186	83	74	0.891566	35	53	1.51429	7	24	3.42857	15	62	4.13333	Oxidation (M); Carbamidomethylation	48075.4	Perilipin-2 OS=Homo sapiens OX=9606 GN=PLIN2 PE=1 SV=2
670	TRUE	P17931|LEG3_HUMAN	266.549	15	14	178	188	1.05618	140	153	1.09286	89	80	0.898876	73	56	0.767123	130	128	0.984615	137	117	0.854015	Oxidation (M)	26152.3	Galectin-3 OS=Homo sapiens OX=9606 GN=LGALS3 PE=1 SV=5
286	TRUE	Q16891|MIC60_HUMAN	327.93	22	22	107	113	1.05607	105	108	1.02857	45	27	0.6	39	17	0.435897	66	58	0.878788	63	63	1		83677.9	MICOS complex subunit MIC60 OS=Homo sapiens OX=9606 GN=IMMT PE=1 SV=1
1179	TRUE	P62714|PP2AB_HUMAN	215.801	9	1	34	32	0.941176	29	26	0.896552	14	12	0.857143	11	20	1.81818	30	26	0.866667	19	27	1.42105	Carbamidomethylation; Oxidation (M)	35575.1	Serine/threonine-protein phosphatase 2A catalytic subunit beta isoform OS=Homo sapiens OX=9606 GN=PPP2CB PE=1 SV=1
955	TRUE	P08236|BGLR_HUMAN	237.228	12	12	36	38	1.05556	31	48	1.54839	11	11	1	8	9	1.125	27	33	1.22222	22	33	1.5		74731.9	Beta-glucuronidase OS=Homo sapiens OX=9606 GN=GUSB PE=1 SV=2
1393	TRUE	Q5ZPR3|CD276_HUMAN	198.463	7	7	18	19	1.05556		19	19	3	4	1.33333				23	19	0.826087	16	20	1.25	Carbamidomethylation	57235.4	CD276 antigen OS=Homo sapiens OX=9606 GN=CD276 PE=1 SV=1
1645	TRUE	Q13636|RAB31_HUMAN	176.981	5	5	18	19	1.05556	20	11	0.55	11	11	1	2	26	13	22	10	0.454545	24	23	0.958333	Carbamidomethylation	21568.8	Ras-related protein Rab-31 OS=Homo sapiens OX=9606 GN=RAB31 PE=1 SV=1
632	TRUE	Q9UJU6|DBNL_HUMAN	272.371	13	13	36	38	1.05556	25	57	2.28	43	35	0.813953	56	38	0.678571	53	53	1	53	46	0.867925	Carbamidomethylation; Oxidation (M)	48207.3	Drebrin-like protein OS=Homo sapiens OX=9606 GN=DBNL PE=1 SV=1
76	TRUE	P07355|ANXA2_HUMAN	404.565	33	33	530	559	1.05472	441	466	1.05669	369	291	0.788618	254	272	1.07087	401	391	0.975062	359	350	0.97493	Carbamidomethylation; Oxidation (M)	38604	Annexin A2 OS=Homo sapiens OX=9606 GN=ANXA2 PE=1 SV=2
256	TRUE	Q96P48|ARAP1_HUMAN	335.675	35	35	129	136	1.05426	119	139	1.16807	44	28	0.636364	7	33	4.71429	119	90	0.756303	53	84	1.58491	Carbamidomethylation; Oxidation (M)	162192	Arf-GAP with Rho-GAP domain, ANK repeat and PH domain-containing protein 1 OS=Homo sapiens OX=9606 GN=ARAP1 PE=1 SV=3
673	TRUE	P21283|VATC1_HUMAN	266.148	14	14	57	60	1.05263	67	74	1.10448	41	42	1.02439	32	35	1.09375	37	34	0.918919	37	41	1.10811	Carbamidomethylation	43941.6	V-type proton ATPase subunit C 1 OS=Homo sapiens OX=9606 GN=ATP6V1C1 PE=1 SV=4
183	TRUE	P60842|IF4A1_HUMAN	356.513	26	18	190	200	1.05263	192	204	1.0625	190	147	0.773684	118	137	1.16102	172	168	0.976744	142	146	1.02817	Oxidation (M); Carbamidomethylation	46153.9	Eukaryotic initiation factor 4A-I OS=Homo sapiens OX=9606 GN=EIF4A1 PE=1 SV=1
1348	TRUE	P17174|AATC_HUMAN	202.52	9	9	19	20	1.05263	19	19	1	3	2	0.666667	3	4	1.33333	28	25	0.892857	30	26	0.866667		46247.5	Aspartate aminotransferase, cytoplasmic OS=Homo sapiens OX=9606 GN=GOT1 PE=1 SV=3
865	TRUE	Q9NVJ2|ARL8B_HUMAN	246.959	9	1	31	26	0.83871	27	44	1.62963	17	11	0.647059		23	23	27	27	1	27	38	1.40741	Carbamidomethylation	21539	ADP-ribosylation factor-like protein 8B OS=Homo sapiens OX=9606 GN=ARL8B PE=1 SV=1
238	TRUE	Q8WUM4|PDC6I_HUMAN	341.761	29	29	134	141	1.05224	113	124	1.09735	99	71	0.717172	61	81	1.32787	102	107	1.04902	106	88	0.830189	Carbamidomethylation; Oxidation (M)	96023.2	Programmed cell death 6-interacting protein OS=Homo sapiens OX=9606 GN=PDCD6IP PE=1 SV=1
99	TRUE	Q9NYU2|UGGG1_HUMAN	387.949	45	45	156	164	1.05128	196	176	0.897959	67	35	0.522388	53	32	0.603774	134	119	0.88806	120	147	1.225	Carbamidomethylation; Oxidation (M)	177190	UDP-glucose:glycoprotein glucosyltransferase 1 OS=Homo sapiens OX=9606 GN=UGGT1 PE=1 SV=3
159	TRUE	Q14764|MVP_HUMAN	364.252	34	34	199	209	1.05025	218	193	0.885321	82	79	0.963415	88	89	1.01136	179	157	0.877095	150	190	1.26667	Carbamidomethylation; Oxidation (M)	99326.9	Major vault protein OS=Homo sapiens OX=9606 GN=MVP PE=1 SV=4
1359	TRUE	Q9Y5P6|GMPPB_HUMAN	201.406	6	6	20	21	1.05	25	34	1.36	17	12	0.705882		9	9	20	24	1.2	14	26	1.85714	Carbamidomethylation	39834.4	Mannose-1-phosphate guanyltransferase beta OS=Homo sapiens OX=9606 GN=GMPPB PE=1 SV=2
2062	TRUE	P47985|UCRI_HUMAN	148.107	4	4	20	21	1.05	21	29	1.38095	4			5	5	1	13	7	0.538462	12	18	1.5		29668	Cytochrome b-c1 complex subunit Rieske, mitochondrial OS=Homo sapiens OX=9606 GN=UQCRFS1 PE=1 SV=2
153	TRUE	P07237|PDIA1_HUMAN	367.564	30	30	243	255	1.04938	235	238	1.01277	185	191	1.03243	181	154	0.850829	233	221	0.948498	243	214	0.880658	Oxidation (M); Carbamidomethylation	57116.4	Protein disulfide-isomerase OS=Homo sapiens OX=9606 GN=P4HB PE=1 SV=3
1174	TRUE	Q92882|OSTF1_HUMAN	216.496	6	6	41	43	1.04878	25	48	1.92	26	24	0.923077	25	29	1.16	30	23	0.766667	25	29	1.16	Carbamidomethylation	23786.8	Osteoclast-stimulating factor 1 OS=Homo sapiens OX=9606 GN=OSTF1 PE=1 SV=2
887	TRUE	Q58FF6|H90B4_HUMAN	244.418	15	2	82	86	1.04878	84	72	0.857143	63	45	0.714286	55	52	0.945455	68	61	0.897059	62	67	1.08065	Oxidation (M); Carbamidomethylation	58264.4	Putative heat shock protein HSP 90-beta 4 OS=Homo sapiens OX=9606 GN=HSP90AB4P PE=5 SV=1
1797	TRUE	P50914|RL14_HUMAN	165.205	4	4	41	43	1.04878	28	28	1	29	29	1	17	28	1.64706	17	17	1	15	16	1.06667	Carbamidomethylation; Oxidation (M)	23431.8	60S ribosomal protein L14 OS=Homo sapiens OX=9606 GN=RPL14 PE=1 SV=4
1068	TRUE	Q96C19|EFHD2_HUMAN	226.692	9	9	41	43	1.04878	59	35	0.59322	57	58	1.01754	64	55	0.859375	46	47	1.02174	55	52	0.945455	Carbamidomethylation	26697.3	EF-hand domain-containing protein D2 OS=Homo sapiens OX=9606 GN=EFHD2 PE=1 SV=1
1085	TRUE	Q8N392|RHG18_HUMAN	224.458	13	13	21	22	1.04762	25	21	0.84	8	7	0.875	9	14	1.55556	20	27	1.35	10	28	2.8	Carbamidomethylation	74976.7	Rho GTPase-activating protein 18 OS=Homo sapiens OX=9606 GN=ARHGAP18 PE=1 SV=3
389	TRUE	O43242|PSMD3_HUMAN	307.101	14	14	63	66	1.04762	55	77	1.4	59	70	1.18644	30	47	1.56667	51	62	1.21569	60	60	1		60977.5	26S proteasome non-ATPase regulatory subunit 3 OS=Homo sapiens OX=9606 GN=PSMD3 PE=1 SV=2
713	TRUE	P25786|PSA1_HUMAN	261.202	9	9	21	22	1.04762	29	28	0.965517	32	26	0.8125	30	24	0.8	39	27	0.692308	27	26	0.962963	Oxidation (M); Carbamidomethylation	29555.6	Proteasome subunit alpha type-1 OS=Homo sapiens OX=9606 GN=PSMA1 PE=1 SV=1
1371	TRUE	Q9H3P7|GCP60_HUMAN	200.292	7	7	21	22	1.04762	13	28	2.15385	18	10	0.555556	12	10	0.833333	30	34	1.13333	41	35	0.853659		60593.4	Golgi resident protein GCP60 OS=Homo sapiens OX=9606 GN=ACBD3 PE=1 SV=4
602	TRUE	Q96CX2|KCD12_HUMAN	277.181	12	11	84	88	1.04762	75	77	1.02667	88	89	1.01136	131	84	0.641221	71	66	0.929577	67	44	0.656716	Carbamidomethylation; Oxidation (M)	35700.8	BTB/POZ domain-containing protein KCTD12 OS=Homo sapiens OX=9606 GN=KCTD12 PE=1 SV=1
202	TRUE	P41250|GARS_HUMAN	352.055	26	26	106	111	1.04717	90	187	2.07778	43	40	0.930233	33	113	3.42424	87	164	1.88506	106	194	1.83019	Carbamidomethylation; Oxidation (M)	83165.6	Glycine--tRNA ligase OS=Homo sapiens OX=9606 GN=GARS1 PE=1 SV=3
374	TRUE	P30041|PRDX6_HUMAN	308.894	15	15	191	200	1.04712	148	161	1.08784	128	100	0.78125	49	76	1.55102	110	117	1.06364	105	98	0.933333	Carbamidomethylation; Oxidation (M)	25035	Peroxiredoxin-6 OS=Homo sapiens OX=9606 GN=PRDX6 PE=1 SV=3
80	TRUE	Q7L576|CYFP1_HUMAN	402.459	54	35	299	313	1.04682	327	304	0.929664	114	121	1.0614	82	156	1.90244	176	176	1	197	194	0.984772	Oxidation (M); Carbamidomethylation	145182	Cytoplasmic FMR1-interacting protein 1 OS=Homo sapiens OX=9606 GN=CYFIP1 PE=1 SV=1
980	TRUE	P59998|ARPC4_HUMAN	234.742	8	8	43	45	1.04651	35	64	1.82857	19	20	1.05263	13	26	2	44	57	1.29545	40	50	1.25	Carbamidomethylation; Oxidation (M)	19667	Actin-related protein 2/3 complex subunit 4 OS=Homo sapiens OX=9606 GN=ARPC4 PE=1 SV=3
660	TRUE	P62258|1433E_HUMAN	267.705	14	13	241	252	1.04564	200	220	1.1	191	148	0.774869	179	146	0.815642	103	101	0.980583	87	70	0.804598	Oxidation (M); Carbamidomethylation	29173.9	14-3-3 protein epsilon OS=Homo sapiens OX=9606 GN=YWHAE PE=1 SV=1
1420	FALSE	Q8NFI4|F10A5_HUMAN	160.119	4	4	22	23	1.04545	14	16	1.14286	20	11	0.55	17	22	1.29412	11	19	1.72727	11	18	1.63636	Oxidation (M)	41377.7	Putative protein FAM10A5 OS=Homo sapiens OX=9606 GN=ST13P5 PE=5 SV=1
351	TRUE	P14550|AK1A1_HUMAN	314.516	13	12	110	115	1.04545	113	109	0.964602	124	119	0.959677	83	118	1.42169	84	87	1.03571	78	73	0.935897	Carbamidomethylation; Oxidation (M)	36573	Aldo-keto reductase family 1 member A1 OS=Homo sapiens OX=9606 GN=AKR1A1 PE=1 SV=3
952	TRUE	P51148|RAB5C_HUMAN	237.647	8	5	44	46	1.04545	54	54	1	60	77	1.28333	77	83	1.07792	47	47	1	52	41	0.788462	Carbamidomethylation; Oxidation (M)	23482.6	Ras-related protein Rab-5C OS=Homo sapiens OX=9606 GN=RAB5C PE=1 SV=2
47	TRUE	Q9BQE3|TBA1C_HUMAN	427.663	45	4	488	510	1.04508	433	509	1.17552	508	501	0.98622	356	481	1.35112	581	624	1.07401	459	492	1.0719	Carbamidomethylation; Oxidation (M)	49895.3	Tubulin alpha-1C chain OS=Homo sapiens OX=9606 GN=TUBA1C PE=1 SV=1
381	TRUE	Q15084|PDIA6_HUMAN	308.057	14	14	111	116	1.04505	115	107	0.930435	101	88	0.871287	74	79	1.06757	110	129	1.17273	136	109	0.801471	Carbamidomethylation	48121.3	Protein disulfide-isomerase A6 OS=Homo sapiens OX=9606 GN=PDIA6 PE=1 SV=1
345	TRUE	Q93050|VPP1_HUMAN	315.947	23	22	67	70	1.04478	66	141	2.13636	28	45	1.60714	15	68	4.53333	53	72	1.35849	54	82	1.51852	Carbamidomethylation	96412.7	V-type proton ATPase 116 kDa subunit a1 OS=Homo sapiens OX=9606 GN=ATP6V0A1 PE=1 SV=3
13	TRUE	Q9Y490|TLN1_HUMAN	537.497	128	118	1305	1363	1.04444	1452	1374	0.946281	777	623	0.801802	581	718	1.2358	1044	1023	0.979885	1012	970	0.958498	Oxidation (M); Carbamidomethylation	269767	Talin-1 OS=Homo sapiens OX=9606 GN=TLN1 PE=1 SV=3
384	TRUE	O00410|IPO5_HUMAN	307.583	25	22	68	71	1.04412	62	97	1.56452	28	43	1.53571	6	26	4.33333	88	75	0.852273	64	60	0.9375	Carbamidomethylation	123630	Importin-5 OS=Homo sapiens OX=9606 GN=IPO5 PE=1 SV=4
978	TRUE	O43488|ARK72_HUMAN	234.806	10	10	23	24	1.04348	11	29	2.63636	16	28	1.75	24	22	0.916667	38	47	1.23684	30	44	1.46667	Carbamidomethylation	39589	Aflatoxin B1 aldehyde reductase member 2 OS=Homo sapiens OX=9606 GN=AKR7A2 PE=1 SV=3
1230	TRUE	O00442|RTCA_HUMAN	211.114	11	11	23	24	1.04348	21	35	1.66667	14	8	0.571429	1	12	12	25	19	0.76	21	27	1.28571	Carbamidomethylation	39336.7	RNA 3'-terminal phosphate cyclase OS=Homo sapiens OX=9606 GN=RTCA PE=1 SV=1
435	TRUE	Q8IY17|PLPL6_HUMAN	299.867	19	19	46	48	1.04348	42	73	1.7381	22	27	1.22727	25	24	0.96	53	61	1.15094	50	61	1.22	Oxidation (M); Carbamidomethylation	150954	Patatin-like phospholipase domain-containing protein 6 OS=Homo sapiens OX=9606 GN=PNPLA6 PE=1 SV=3
1767	TRUE	P11279|LAMP1_HUMAN	167.233	3	3	23	24	1.04348	35	37	1.05714	18	15	0.833333	13	31	2.38462	18	21	1.16667	22	15	0.681818		44882.3	Lysosome-associated membrane glycoprotein 1 OS=Homo sapiens OX=9606 GN=LAMP1 PE=1 SV=3
215	TRUE	P08133|ANXA6_HUMAN	347.558	29	28	119	124	1.04202	134	131	0.977612	69	63	0.913043	64	72	1.125	92	82	0.891304	88	87	0.988636	Carbamidomethylation; Oxidation (M)	75873.3	Annexin A6 OS=Homo sapiens OX=9606 GN=ANXA6 PE=1 SV=3
104	TRUE	Q99798|ACON_HUMAN	386.04	36	36	191	199	1.04188	236	262	1.11017	107	99	0.925234	79	55	0.696203	226	210	0.929204	214	222	1.03738	Carbamidomethylation; Oxidation (M)	85425.4	Aconitate hydratase, mitochondrial OS=Homo sapiens OX=9606 GN=ACO2 PE=1 SV=2
1831	TRUE	Q01433|AMPD2_HUMAN	163.472	9	9	24	25	1.04167	21	30	1.42857		7	7	1	14	14		10	10		15	15	Carbamidomethylation	100688	AMP deaminase 2 OS=Homo sapiens OX=9606 GN=AMPD2 PE=1 SV=2
1587	TRUE	P22681|CBL_HUMAN	182.546	7	6	25	26	1.04	44	43	0.977273	1				1	1		6	6	2	7	3.5	Carbamidomethylation	99632.8	E3 ubiquitin-protein ligase CBL OS=Homo sapiens OX=9606 GN=CBL PE=1 SV=2
504	TRUE	O00764|PDXK_HUMAN	291.13	19	19	75	78	1.04	69	57	0.826087	102	79	0.77451	43	57	1.32558	63	82	1.30159	63	77	1.22222	Carbamidomethylation	35102.3	Pyridoxal kinase OS=Homo sapiens OX=9606 GN=PDXK PE=1 SV=1
1122	TRUE	Q14696|MESD_HUMAN	221.48	7	7	25	26	1.04	35	20	0.571429	10	4	0.4	14	8	0.571429	29	25	0.862069	29	25	0.862069	Carbamidomethylation	26076.6	LRP chaperone MESD OS=Homo sapiens OX=9606 GN=MESD PE=1 SV=2
24	TRUE	P23381|SYWC_HUMAN	476.589	58	58	351	365	1.03989	1296	1315	1.01466	253	207	0.818182	939	966	1.02875	380	349	0.918421	1201	1210	1.00749	Carbamidomethylation; Oxidation (M)	53165.4	Tryptophan--tRNA ligase, cytoplasmic OS=Homo sapiens OX=9606 GN=WARS1 PE=1 SV=2
366	TRUE	P45974|UBP5_HUMAN	311.084	24	24	77	80	1.03896	84	79	0.940476	40	38	0.95	43	41	0.953488	84	77	0.916667	80	67	0.8375	Carbamidomethylation	95786.3	Ubiquitin carboxyl-terminal hydrolase 5 OS=Homo sapiens OX=9606 GN=USP5 PE=1 SV=2
1419	TRUE	Q8IYD1|ERF3B_HUMAN	197.055	6	1	21	20	0.952381	22	19	0.863636	8	1	0.125	1	3	3	18	12	0.666667	8	11	1.375	Carbamidomethylation	68883.2	Eukaryotic peptide chain release factor GTP-binding subunit ERF3B OS=Homo sapiens OX=9606 GN=GSPT2 PE=1 SV=2
16	FALSE	Q7Z3Y7|K1C28_HUMAN	144.78	4	1	9	23	2.55556	214	20	0.0934579				1			5	3	0.6	8	11	1.375	Oxidation (M)	50567.4	Keratin, type I cytoskeletal 28 OS=Homo sapiens OX=9606 GN=KRT28 PE=1 SV=2
566	TRUE	O94973|AP2A2_HUMAN	281.57	19	14	78	81	1.03846	80	91	1.1375	22	23	1.04545	24	31	1.29167	34	32	0.941176	22	26	1.18182	Carbamidomethylation	103960	AP-2 complex subunit alpha-2 OS=Homo sapiens OX=9606 GN=AP2A2 PE=1 SV=2
1157	TRUE	P17612|KAPCA_HUMAN	218.24	11	6	26	27	1.03846	15	26	1.73333	12	17	1.41667	12	12	1	14	13	0.928571	18	18	1	Carbamidomethylation	40589.7	cAMP-dependent protein kinase catalytic subunit alpha OS=Homo sapiens OX=9606 GN=PRKACA PE=1 SV=2
596	TRUE	Q15691|MARE1_HUMAN	278.036	11	11	52	54	1.03846	42	42	1	43	39	0.906977	11	39	3.54545	47	29	0.617021	28	23	0.821429	Carbamidomethylation	29999.1	Microtubule-associated protein RP/EB family member 1 OS=Homo sapiens OX=9606 GN=MAPRE1 PE=1 SV=3
252	TRUE	P63244|RACK1_HUMAN	336.772	20	20	109	113	1.0367	108	117	1.08333	100	111	1.11	53	109	2.0566	102	96	0.941176	110	97	0.881818	Carbamidomethylation; Oxidation (M)	35076.7	Receptor of activated protein C kinase 1 OS=Homo sapiens OX=9606 GN=RACK1 PE=1 SV=3
138	TRUE	P27824|CALX_HUMAN	372.594	29	29	168	174	1.03571	206	173	0.839806	115	113	0.982609	92	90	0.978261	141	145	1.02837	125	154	1.232	Carbamidomethylation; Oxidation (M)	67568.3	Calnexin OS=Homo sapiens OX=9606 GN=CANX PE=1 SV=2
764	TRUE	Q9H2M9|RBGPR_HUMAN	256.159	20	20	28	29	1.03571	44	61	1.38636	5	4	0.8	5	6	1.2	17	17	1	9	10	1.11111	Oxidation (M); Carbamidomethylation	155985	Rab3 GTPase-activating protein non-catalytic subunit OS=Homo sapiens OX=9606 GN=RAB3GAP2 PE=1 SV=1
777	TRUE	Q00325|MPCP_HUMAN	255.064	15	15	84	87	1.03571	118	140	1.18644	61	49	0.803279	42	56	1.33333	98	124	1.26531	116	103	0.887931	Carbamidomethylation; Oxidation (M)	40094.9	Phosphate carrier protein, mitochondrial OS=Homo sapiens OX=9606 GN=SLC25A3 PE=1 SV=2
65	TRUE	P11413|G6PD_HUMAN	409.906	44	44	338	350	1.0355	329	331	1.00608	259	223	0.861004	156	191	1.22436	390	381	0.976923	308	329	1.06818	Carbamidomethylation; Oxidation (M)	59256.7	Glucose-6-phosphate 1-dehydrogenase OS=Homo sapiens OX=9606 GN=G6PD PE=1 SV=4
56	TRUE	P68366|TBA4A_HUMAN	416.034	43	4	483	500	1.0352	455	504	1.10769	463	483	1.0432	303	420	1.38614	627	690	1.10048	498	546	1.09639	Carbamidomethylation; Oxidation (M)	49924.4	Tubulin alpha-4A chain OS=Homo sapiens OX=9606 GN=TUBA4A PE=1 SV=1
642	TRUE	Q7Z406|MYH14_HUMAN	270.684	17	3	87	90	1.03448	95	88	0.926316	58	49	0.844828	37	53	1.43243	72	68	0.944444	75	70	0.933333	Carbamidomethylation; Oxidation (M)	227871	Myosin-14 OS=Homo sapiens OX=9606 GN=MYH14 PE=1 SV=2
1500	TRUE	Q7L523|RRAGA_HUMAN	190.073	6	6	29	30	1.03448	28	30	1.07143	7	9	1.28571	10	13	1.3	16	15	0.9375	31	23	0.741935	Carbamidomethylation; Oxidation (M)	36566.1	Ras-related GTP-binding protein A OS=Homo sapiens OX=9606 GN=RRAGA PE=1 SV=1
1610	TRUE	Q7Z3Y8|K1C27_HUMAN	180.453	8	1	22	36	1.63636	255	26	0.101961	14	27	1.92857	14	29	2.07143	14	15	1.07143	22	30	1.36364	Oxidation (M)	49822.3	Keratin, type I cytoskeletal 27 OS=Homo sapiens OX=9606 GN=KRT27 PE=1 SV=2
243	TRUE	P61160|ARP2_HUMAN	339.462	19	19	208	215	1.03365	216	224	1.03704	137	129	0.941606	101	130	1.28713	229	176	0.768559	182	172	0.945055	Carbamidomethylation; Oxidation (M)	44760.8	Actin-related protein 2 OS=Homo sapiens OX=9606 GN=ACTR2 PE=1 SV=1
100	TRUE	P55160|NCKPL_HUMAN	387.195	43	42	180	186	1.03333	247	269	1.08907	41	60	1.46341	40	68	1.7	132	144	1.09091	105	156	1.48571	Carbamidomethylation; Oxidation (M)	128153	Nck-associated protein 1-like OS=Homo sapiens OX=9606 GN=NCKAP1L PE=1 SV=3
1683	TRUE	P60660|MYL6_HUMAN	173.822	4	4	30	31	1.03333	33	33	1	32	33	1.03125	22	28	1.27273	15	21	1.4	13	16	1.23077	Carbamidomethylation; Oxidation (M)	16930	Myosin light polypeptide 6 OS=Homo sapiens OX=9606 GN=MYL6 PE=1 SV=2
191	TRUE	P23528|COF1_HUMAN	353.636	20	15	270	279	1.03333	308	318	1.03247	363	276	0.760331	266	320	1.20301	292	268	0.917808	272	255	0.9375	Carbamidomethylation	18502.5	Cofilin-1 OS=Homo sapiens OX=9606 GN=CFL1 PE=1 SV=3
1077	TRUE	P30050|RL12_HUMAN	225.868	5	5	61	63	1.03279	67	47	0.701493	67	54	0.80597	11	44	4	49	39	0.795918	45	39	0.866667	Carbamidomethylation	17818.6	60S ribosomal protein L12 OS=Homo sapiens OX=9606 GN=RPL12 PE=1 SV=1
248	TRUE	P43490|NAMPT_HUMAN	337.268	24	24	123	127	1.03252	163	178	1.09202	134	103	0.768657	135	135	1	95	86	0.905263	111	119	1.07207	Carbamidomethylation; Oxidation (M)	55521.2	Nicotinamide phosphoribosyltransferase OS=Homo sapiens OX=9606 GN=NAMPT PE=1 SV=1
37	FALSE	P17661|DESM_HUMAN	167.528	4	2	62	64	1.03226	59	77	1.30508	36	47	1.30556	16	23	1.4375	56	58	1.03571	58	67	1.15517		53535.8	Desmin OS=Homo sapiens OX=9606 GN=DES PE=1 SV=3
629	TRUE	Q99714|HCD2_HUMAN	273.276	11	11	31	32	1.03226	39	33	0.846154	46	47	1.02174	33	48	1.45455	63	51	0.809524	69	71	1.02899	Carbamidomethylation; Oxidation (M)	26923.1	3-hydroxyacyl-CoA dehydrogenase type-2 OS=Homo sapiens OX=9606 GN=HSD17B10 PE=1 SV=3
308	TRUE	Q7Z3T8|ZFY16_HUMAN	324.542	29	29	98	101	1.03061	106	114	1.07547	4	4	1	20	47	2.35	64	77	1.20312	66	116	1.75758	Carbamidomethylation	168903	Zinc finger FYVE domain-containing protein 16 OS=Homo sapiens OX=9606 GN=ZFYVE16 PE=1 SV=3
1961	TRUE	Q58FG1|HS904_HUMAN	155.11	4	2	99	102	1.0303	106	101	0.95283	54	47	0.87037	53	35	0.660377	91	88	0.967033	85	93	1.09412	Oxidation (M); Carbamidomethylation	47711.9	Putative heat shock protein HSP 90-alpha A4 OS=Homo sapiens OX=9606 GN=HSP90AA4P PE=5 SV=1
82	TRUE	Q9UPN3|MACF1_HUMAN	400.858	72	72	102	105	1.02941	198	218	1.10101	6			6	15	2.5	4	25	6.25	30	35	1.16667	Carbamidomethylation; Oxidation (M)	838308	Microtubule-actin cross-linking factor 1, isoforms 1/2/3/5 OS=Homo sapiens OX=9606 GN=MACF1 PE=1 SV=4
267	TRUE	O95573|ACSL3_HUMAN	333.127	27	25	69	71	1.02899	74	135	1.82432	62	69	1.1129	21	79	3.7619	60	64	1.06667	71	111	1.56338	Oxidation (M); Carbamidomethylation	80420.1	Long-chain-fatty-acid--CoA ligase 3 OS=Homo sapiens OX=9606 GN=ACSL3 PE=1 SV=3
1407	TRUE	Q14019|COTL1_HUMAN	197.513	6	6	35	36	1.02857	45	42	0.933333	21	40	1.90476	21	24	1.14286	21	29	1.38095	29	25	0.862069	Carbamidomethylation	15945	Coactosin-like protein OS=Homo sapiens OX=9606 GN=COTL1 PE=1 SV=3
1697	TRUE	P62745|RHOB_HUMAN	172.685	4	1	47	28	0.595745	46	44	0.956522	15	14	0.933333	7	9	1.28571	21	23	1.09524	17	23	1.35294	Carbamidomethylation	22123.4	Rho-related GTP-binding protein RhoB OS=Homo sapiens OX=9606 GN=RHOB PE=1 SV=1
636	TRUE	P27348|1433T_HUMAN	271.977	11	10	215	221	1.02791	170	195	1.14706	161	123	0.763975	122	99	0.811475	103	83	0.805825	69	63	0.913043	Carbamidomethylation; Oxidation (M)	27764.2	14-3-3 protein theta OS=Homo sapiens OX=9606 GN=YWHAQ PE=1 SV=1
766	TRUE	Q8NBJ5|GT251_HUMAN	256.144	16	16	36	37	1.02778	31	53	1.70968	11	18	1.63636		8	8	26	38	1.46154	26	29	1.11538	Carbamidomethylation	71636.1	Procollagen galactosyltransferase 1 OS=Homo sapiens OX=9606 GN=COLGALT1 PE=1 SV=1
268	TRUE	Q13423|NNTM_HUMAN	332.844	26	26	108	111	1.02778	91	96	1.05495	88	65	0.738636	85	61	0.717647	111	101	0.90991	97	104	1.07216	Oxidation (M); Carbamidomethylation	113896	NAD(P) transhydrogenase, mitochondrial OS=Homo sapiens OX=9606 GN=NNT PE=1 SV=3
891	TRUE	P61981|1433G_HUMAN	243.908	9	8	218	224	1.02752	160	201	1.25625	137	86	0.627737	102	81	0.794118	90	83	0.922222	86	63	0.732558	Oxidation (M); Carbamidomethylation	28302.6	14-3-3 protein gamma OS=Homo sapiens OX=9606 GN=YWHAG PE=1 SV=2
73	TRUE	P52209|6PGD_HUMAN	405.746	31	31	367	377	1.02725	392	399	1.01786	315	270	0.857143	263	350	1.3308	370	338	0.913514	327	333	1.01835	Oxidation (M); Carbamidomethylation	53140	6-phosphogluconate dehydrogenase, decarboxylating OS=Homo sapiens OX=9606 GN=PGD PE=1 SV=3
78	TRUE	P51659|DHB4_HUMAN	403.099	43	43	294	302	1.02721	273	315	1.15385	137	89	0.649635	100	85	0.85	351	400	1.1396	284	357	1.25704	Carbamidomethylation; Oxidation (M)	79686.4	Peroxisomal multifunctional enzyme type 2 OS=Homo sapiens OX=9606 GN=HSD17B4 PE=1 SV=3
63	TRUE	Q92616|GCN1_HUMAN	410.88	71	71	264	271	1.02652	244	316	1.29508	11	5	0.454545	2	34	17	157	214	1.36306	82	202	2.46341	Carbamidomethylation; Oxidation (M)	292758	eIF-2-alpha kinase activator GCN1 OS=Homo sapiens OX=9606 GN=GCN1 PE=1 SV=6
4	TRUE	Q13085|ACACA_HUMAN	580.868	143	128	1139	1169	1.02634	922	808	0.876356	912	598	0.655702	549	570	1.03825	1971	2013	1.02131	1964	1631	0.830448	Carbamidomethylation; Oxidation (M)	265554	Acetyl-CoA carboxylase 1 OS=Homo sapiens OX=9606 GN=ACACA PE=1 SV=2
34	TRUE	P13639|EF2_HUMAN	448.772	57	57	613	629	1.0261	506	660	1.30435	431	454	1.05336	232	421	1.81466	662	657	0.992447	519	612	1.17919	Carbamidomethylation; Oxidation (M)	95338.1	Elongation factor 2 OS=Homo sapiens OX=9606 GN=EEF2 PE=1 SV=4
120	TRUE	Q99536|VAT1_HUMAN	380.9	24	24	349	358	1.02579	328	372	1.13415	292	243	0.832192	222	301	1.35586	329	314	0.954407	305	311	1.01967	Carbamidomethylation; Oxidation (M)	41920.2	Synaptic vesicle membrane protein VAT-1 homolog OS=Homo sapiens OX=9606 GN=VAT1 PE=1 SV=2
1020	TRUE	Q15392|DHC24_HUMAN	230.447	11	11	39	40	1.02564	27	64	2.37037	6	7	1.16667		7	7	26	32	1.23077	12	22	1.83333	Carbamidomethylation	60101.2	Delta(24)-sterol reductase OS=Homo sapiens OX=9606 GN=DHCR24 PE=1 SV=2
221	TRUE	O14980|XPO1_HUMAN	346.117	27	27	117	120	1.02564	137	155	1.13139	46	44	0.956522	45	69	1.53333	113	98	0.867257	90	91	1.01111	Carbamidomethylation; Oxidation (M)	123386	Exportin-1 OS=Homo sapiens OX=9606 GN=XPO1 PE=1 SV=1
3788	TRUE	Q9P1F3|ABRAL_HUMAN	41.7223	1	1				4										6	6	3	4	1.33333		9056.49	Costars family protein ABRACL OS=Homo sapiens OX=9606 GN=ABRACL PE=1 SV=1
29	FALSE	Q14568|HS902_HUMAN	326.78	16	3	283	290	1.02473	271	257	0.948339	153	149	0.973856	176	140	0.795455	237	233	0.983122	229	256	1.1179	Oxidation (M)	39364.8	Heat shock protein HSP 90-alpha A2 OS=Homo sapiens OX=9606 GN=HSP90AA2P PE=1 SV=2
645	TRUE	P12235|ADT1_HUMAN	270.281	16	2	124	127	1.02419	127	139	1.09449	82	55	0.670732	57	55	0.964912	138	153	1.1087	164	165	1.0061	Carbamidomethylation; Oxidation (M)	33064.5	ADP/ATP translocase 1 OS=Homo sapiens OX=9606 GN=SLC25A4 PE=1 SV=4
182	TRUE	P19367|HXK1_HUMAN	356.569	29	24	167	171	1.02395	166	204	1.22892	93	69	0.741935	67	96	1.43284	138	117	0.847826	119	132	1.10924	Carbamidomethylation; Oxidation (M)	102486	Hexokinase-1 OS=Homo sapiens OX=9606 GN=HK1 PE=1 SV=3
1423	TRUE	Q07020|RL18_HUMAN	196.135	6	6	42	43	1.02381	44	46	1.04545	29	22	0.758621	23	20	0.869565	27	27	1	26	29	1.11538	Carbamidomethylation	21634.5	60S ribosomal protein L18 OS=Homo sapiens OX=9606 GN=RPL18 PE=1 SV=2
1010	TRUE	Q9BY44|EIF2A_HUMAN	231.738	14	14	43	44	1.02326	27	38	1.40741	39	17	0.435897	17	6	0.352941	38	47	1.23684	46	51	1.1087	Carbamidomethylation	64990.1	Eukaryotic translation initiation factor 2A OS=Homo sapiens OX=9606 GN=EIF2A PE=1 SV=3
118	TRUE	Q12965|MYO1E_HUMAN	381.026	39	33	215	220	1.02326	209	183	0.875598	103	91	0.883495	99	96	0.969697	123	110	0.894309	135	116	0.859259	Carbamidomethylation	127062	Unconventional myosin-Ie OS=Homo sapiens OX=9606 GN=MYO1E PE=1 SV=2
479	TRUE	P62140|PP1B_HUMAN	293.909	13	3	43	44	1.02326	69	90	1.30435	74	60	0.810811	42	44	1.04762	78	77	0.987179	87	63	0.724138	Carbamidomethylation; Oxidation (M)	37186.8	Serine/threonine-protein phosphatase PP1-beta catalytic subunit OS=Homo sapiens OX=9606 GN=PPP1CB PE=1 SV=3
1642	TRUE	P46778|RL21_HUMAN	177.172	5	5	44	45	1.02273	52	40	0.769231	28	23	0.821429	17	17	1	19	24	1.26316	12	20	1.66667	Oxidation (M)	18564.8	60S ribosomal protein L21 OS=Homo sapiens OX=9606 GN=RPL21 PE=1 SV=2
121	TRUE	P06576|ATPB_HUMAN	379.629	28	28	269	275	1.0223	254	254	1	283	186	0.657244	261	176	0.67433	271	313	1.15498	296	287	0.969595	Oxidation (M)	56559.9	ATP synthase subunit beta, mitochondrial OS=Homo sapiens OX=9606 GN=ATP5F1B PE=1 SV=3
3078	TRUE	Q9NRP0|OSTC_HUMAN	80.515	1	1	7	4	0.571429	6	3	0.5	7	9	1.28571		3	3	4	7	1.75	6	8	1.33333	Carbamidomethylation	16829.3	Oligosaccharyltransferase complex subunit OSTC OS=Homo sapiens OX=9606 GN=OSTC PE=1 SV=1
361	TRUE	P09622|DLDH_HUMAN	311.576	17	17	91	93	1.02198	110	113	1.02727	79	84	1.06329	52	47	0.903846	95	80	0.842105	74	77	1.04054	Carbamidomethylation; Oxidation (M)	54177.2	Dihydrolipoyl dehydrogenase, mitochondrial OS=Homo sapiens OX=9606 GN=DLD PE=1 SV=2
576	TRUE	Q9BZF1|OSBL8_HUMAN	280.347	17	17	46	47	1.02174	50	58	1.16	1	3	3	1			37	45	1.21622	36	38	1.05556	Carbamidomethylation	101196	Oxysterol-binding protein-related protein 8 OS=Homo sapiens OX=9606 GN=OSBPL8 PE=1 SV=3
654	FALSE	Q2VIR3|IF2GL_HUMAN	245.249	12	12	47	48	1.02128	44	45	1.02273	28	12	0.428571	12	41	3.41667	34	40	1.17647	41	35	0.853659	Carbamidomethylation; Oxidation (M)	51228.6	Eukaryotic translation initiation factor 2 subunit 3B OS=Homo sapiens OX=9606 GN=EIF2S3B PE=2 SV=2
3552	TRUE	P48729|KC1A_HUMAN	53.823	1	1	2			9	7	0.777778	2	4	2	3	11	3.66667	10	14	1.4	3	4	1.33333		38914.8	Casein kinase I isoform alpha OS=Homo sapiens OX=9606 GN=CSNK1A1 PE=1 SV=2
3552	TRUE	Q8N752|KC1AL_HUMAN	53.823	1	1	2			9	7	0.777778	2	4	2	3	11	3.66667	10	14	1.4	3	4	1.33333		39085.9	Casein kinase I isoform alpha-like OS=Homo sapiens OX=9606 GN=CSNK1A1L PE=2 SV=2
39	TRUE	P21980|TGM2_HUMAN	439.128	51	51	578	590	1.02076	536	658	1.22761	371	413	1.11321	220	307	1.39545	603	616	1.02156	445	470	1.05618	Carbamidomethylation; Oxidation (M)	77328.8	Protein-glutamine gamma-glutamyltransferase 2 OS=Homo sapiens OX=9606 GN=TGM2 PE=1 SV=2
144	TRUE	P13489|RINI_HUMAN	371.66	22	22	153	156	1.01961	156	162	1.03846	234	255	1.08974	50	245	4.9	199	171	0.859296	149	140	0.939597	Carbamidomethylation; Oxidation (M)	49973.5	Ribonuclease inhibitor OS=Homo sapiens OX=9606 GN=RNH1 PE=1 SV=2
41	TRUE	Q13576|IQGA2_HUMAN	434.968	76	73	367	374	1.01907	448	394	0.879464	148	139	0.939189	208	151	0.725962	195	199	1.02051	215	252	1.17209	Oxidation (M); Carbamidomethylation	180578	Ras GTPase-activating-like protein IQGAP2 OS=Homo sapiens OX=9606 GN=IQGAP2 PE=1 SV=4
593	TRUE	P07686|HEXB_HUMAN	278.081	15	15	57	58	1.01754	49	76	1.55102	28	45	1.60714	34	55	1.61765	47	54	1.14894	48	60	1.25	Carbamidomethylation; Oxidation (M)	63111.3	Beta-hexosaminidase subunit beta OS=Homo sapiens OX=9606 GN=HEXB PE=1 SV=3
792	TRUE	Q9Y3F4|STRAP_HUMAN	253.573	8	8	57	58	1.01754	48	60	1.25	67	65	0.970149	67	64	0.955224	61	63	1.03279	62	52	0.83871		38438.3	Serine-threonine kinase receptor-associated protein OS=Homo sapiens OX=9606 GN=STRAP PE=1 SV=1
1321	TRUE	P16989|YBOX3_HUMAN	203.901	5	2	59	60	1.01695	58	50	0.862069	30	30	1	22	20	0.909091	25	28	1.12	26	24	0.923077		40089.9	Y-box-binding protein 3 OS=Homo sapiens OX=9606 GN=YBX3 PE=1 SV=4
168	TRUE	P19971|TYPH_HUMAN	360.875	24	24	178	181	1.01685	260	336	1.29231	198	182	0.919192	235	405	1.7234	112	132	1.17857	196	261	1.33163	Carbamidomethylation; Oxidation (M)	49955.5	Thymidine phosphorylase OS=Homo sapiens OX=9606 GN=TYMP PE=1 SV=2
387	TRUE	Q9H223|EHD4_HUMAN	307.393	24	20	61	62	1.01639	59	82	1.38983	83	89	1.07229	78	82	1.05128	60	67	1.11667	58	67	1.15517	Oxidation (M); Carbamidomethylation	61175.1	EH domain-containing protein 4 OS=Homo sapiens OX=9606 GN=EHD4 PE=1 SV=1
3130	TRUE	P51970|NDUA8_HUMAN	77.686	1	1	8				6	6							6	6	1	3	4	1.33333		20105	NADH dehydrogenase [ubiquinone] 1 alpha subcomplex subunit 8 OS=Homo sapiens OX=9606 GN=NDUFA8 PE=1 SV=3
38	TRUE	P11142|HSP7C_HUMAN	440.322	51	31	737	749	1.01628	558	724	1.29749	458	425	0.927948	469	362	0.771855	713	716	1.00421	637	622	0.976452	Carbamidomethylation; Oxidation (M)	70898.1	Heat shock cognate 71 kDa protein OS=Homo sapiens OX=9606 GN=HSPA8 PE=1 SV=1
49	TRUE	O43707|ACTN4_HUMAN	427.395	58	37	383	389	1.01567	375	365	0.973333	326	346	1.06135	236	252	1.0678	514	542	1.05447	433	492	1.13626	Carbamidomethylation; Oxidation (M)	104854	Alpha-actinin-4 OS=Homo sapiens OX=9606 GN=ACTN4 PE=1 SV=2
35	TRUE	P78527|PRKDC_HUMAN	447.797	104	104	457	464	1.01532	448	436	0.973214	50	8	0.16	22	33	1.5	161	190	1.18012	190	193	1.01579	Carbamidomethylation; Oxidation (M)	469089	DNA-dependent protein kinase catalytic subunit OS=Homo sapiens OX=9606 GN=PRKDC PE=1 SV=3
151	TRUE	P28838|AMPL_HUMAN	368.975	28	28	196	199	1.01531	499	477	0.955912	180	164	0.911111	255	385	1.5098	170	162	0.952941	292	284	0.972603	Oxidation (M); Carbamidomethylation	56166.3	Cytosol aminopeptidase OS=Homo sapiens OX=9606 GN=LAP3 PE=1 SV=3
407	TRUE	A0AVT1|UBA6_HUMAN	304.08	23	23	67	68	1.01493	62	65	1.04839	11	13	1.18182	1	6	6	30	39	1.3	42	48	1.14286	Carbamidomethylation	117970	Ubiquitin-like modifier-activating enzyme 6 OS=Homo sapiens OX=9606 GN=UBA6 PE=1 SV=1
209	TRUE	P00390|GSHR_HUMAN	349.785	27	27	134	136	1.01493	121	153	1.26446	108	94	0.87037	68	109	1.60294	129	129	1	128	125	0.976562	Carbamidomethylation; Oxidation (M)	56257	Glutathione reductase, mitochondrial OS=Homo sapiens OX=9606 GN=GSR PE=1 SV=2
244	TRUE	Q13200|PSMD2_HUMAN	338.308	30	30	136	138	1.01471	131	174	1.32824	53	61	1.15094	32	61	1.90625	82	82	1	78	70	0.897436	Oxidation (M); Carbamidomethylation	100200	26S proteasome non-ATPase regulatory subunit 2 OS=Homo sapiens OX=9606 GN=PSMD2 PE=1 SV=3
1415	FALSE	Q9BQ39|DDX50_HUMAN	78.4857	1	1	5	3	0.6	6	4	0.666667	11	3	0.272727	2			5	4	0.8	3	4	1.33333		82565	ATP-dependent RNA helicase DDX50 OS=Homo sapiens OX=9606 GN=DDX50 PE=1 SV=1
434	TRUE	P04179|SODM_HUMAN	299.895	15	15	139	141	1.01439	201	189	0.940299	79	54	0.683544	83	87	1.04819	66	61	0.924242	110	95	0.863636	Carbamidomethylation; Oxidation (M)	24750.1	Superoxide dismutase [Mn], mitochondrial OS=Homo sapiens OX=9606 GN=SOD2 PE=1 SV=3
375	TRUE	O00571|DDX3X_HUMAN	308.831	20	18	73	74	1.0137	63	105	1.66667	99	111	1.12121	84	98	1.16667	72	77	1.06944	63	91	1.44444	Carbamidomethylation; Oxidation (M)	73243.4	ATP-dependent RNA helicase DDX3X OS=Homo sapiens OX=9606 GN=DDX3X PE=1 SV=3
9	TRUE	P35579|MYH9_HUMAN	563.017	128	104	1776	1800	1.01351	1992	1668	0.837349	899	708	0.787542	713	732	1.02665	1636	1498	0.915648	1533	1576	1.02805	Carbamidomethylation; Oxidation (M)	226532	Myosin-9 OS=Homo sapiens OX=9606 GN=MYH9 PE=1 SV=4
37	TRUE	P08670|VIME_HUMAN	441.613	56	54	1409	1428	1.01348	1408	1508	1.07102	1272	1107	0.870283	1271	1035	0.814319	1335	1472	1.10262	1338	1577	1.17862	Oxidation (M); Carbamidomethylation	53651.7	Vimentin OS=Homo sapiens OX=9606 GN=VIM PE=1 SV=4
1349	FALSE	O15131|IMA6_HUMAN	153.614	4	1	7	16	2.28571	10	21	2.1		4	4	2	4	2	13	7	0.538462	6	8	1.33333	Carbamidomethylation	60349	Importin subunit alpha-6 OS=Homo sapiens OX=9606 GN=KPNA5 PE=1 SV=2
68	TRUE	P40939|ECHA_HUMAN	408.225	35	35	298	302	1.01342	301	366	1.21595	260	186	0.715385	173	191	1.10405	370	308	0.832432	312	312	1	Oxidation (M); Carbamidomethylation	82999.6	Trifunctional enzyme subunit alpha, mitochondrial OS=Homo sapiens OX=9606 GN=HADHA PE=1 SV=2
429	TRUE	Q13177|PAK2_HUMAN	300.287	17	15	88	89	1.01136	99	82	0.828283	78	65	0.833333	66	60	0.909091	79	94	1.18987	86	89	1.03488	Carbamidomethylation; Oxidation (M)	58042.6	Serine/threonine-protein kinase PAK 2 OS=Homo sapiens OX=9606 GN=PAK2 PE=1 SV=3
419	TRUE	P51572|BAP31_HUMAN	302.55	18	18	88	89	1.01136	94	102	1.08511	77	54	0.701299	51	64	1.2549	85	75	0.882353	108	106	0.981481	Oxidation (M)	27991.6	B-cell receptor-associated protein 31 OS=Homo sapiens OX=9606 GN=BCAP31 PE=1 SV=3
213	TRUE	P50570|DYN2_HUMAN	347.882	31	26	100	101	1.01	120	138	1.15	33	49	1.48485	41	32	0.780488	78	86	1.10256	76	94	1.23684	Carbamidomethylation	98064.3	Dynamin-2 OS=Homo sapiens OX=9606 GN=DNM2 PE=1 SV=2
234	TRUE	P31939|PUR9_HUMAN	342.536	27	27	106	107	1.00943	109	96	0.880734	62	19	0.306452	24	25	1.04167	134	138	1.02985	106	100	0.943396	Carbamidomethylation	64615.9	Bifunctional purine biosynthesis protein ATIC OS=Homo sapiens OX=9606 GN=ATIC PE=1 SV=3
369	TRUE	Q96F07|CYFP2_HUMAN	310.158	21	2	108	109	1.00926	116	109	0.939655	49	46	0.938776	28	64	2.28571	71	70	0.985915	78	77	0.987179	Carbamidomethylation; Oxidation (M)	148398	Cytoplasmic FMR1-interacting protein 2 OS=Homo sapiens OX=9606 GN=CYFIP2 PE=1 SV=2
294	TRUE	Q05655|KPCD_HUMAN	326.082	21	21	109	110	1.00917	84	128	1.52381	56	83	1.48214	63	58	0.920635	63	85	1.34921	76	77	1.01316	Carbamidomethylation	77505	Protein kinase C delta type OS=Homo sapiens OX=9606 GN=PRKCD PE=1 SV=2
36	TRUE	P55072|TERA_HUMAN	441.682	49	49	341	344	1.0088	347	369	1.0634	278	241	0.866906	139	223	1.60432	327	363	1.11009	321	300	0.934579	Oxidation (M); Carbamidomethylation	89321.8	Transitional endoplasmic reticulum ATPase OS=Homo sapiens OX=9606 GN=VCP PE=1 SV=4
330	TRUE	Q16658|FSCN1_HUMAN	320.725	20	20	118	119	1.00847	108	113	1.0463	46	34	0.73913	3	5	1.66667	94	97	1.03191	93	96	1.03226	Carbamidomethylation	54530	Fascin OS=Homo sapiens OX=9606 GN=FSCN1 PE=1 SV=3
19	TRUE	Q9NZM1|MYOF_HUMAN	517.419	107	104	593	598	1.00843	790	817	1.03418	295	204	0.691525	300	320	1.06667	423	391	0.92435	487	544	1.11704	Carbamidomethylation; Oxidation (M)	234709	Myoferlin OS=Homo sapiens OX=9606 GN=MYOF PE=1 SV=1
9	FALSE	P35749|MYH11_HUMAN	300.867	17	2	142	143	1.00704	157	128	0.815287	110	87	0.790909	88	105	1.19318	125	120	0.96	124	106	0.854839	Carbamidomethylation; Oxidation (M)	227339	Myosin-11 OS=Homo sapiens OX=9606 GN=MYH11 PE=1 SV=3
157	TRUE	Q13045|FLII_HUMAN	365.56	32	32	152	153	1.00658	139	134	0.964029	114	101	0.885965	40	65	1.625	129	132	1.02326	133	133	1	Carbamidomethylation; Oxidation (M)	144751	Protein flightless-1 homolog OS=Homo sapiens OX=9606 GN=FLII PE=1 SV=2
101	TRUE	P27797|CALR_HUMAN	386.537	29	29	312	314	1.00641	263	290	1.10266	340	183	0.538235	192	167	0.869792	323	331	1.02477	317	334	1.05363	Carbamidomethylation; Oxidation (M)	48141.6	Calreticulin OS=Homo sapiens OX=9606 GN=CALR PE=1 SV=1
125	TRUE	P17858|PFKAL_HUMAN	378.547	30	26	174	175	1.00575	200	200	1	84	81	0.964286	81	109	1.34568	132	161	1.2197	136	171	1.25735	Carbamidomethylation; Oxidation (M)	85018.4	ATP-dependent 6-phosphofructokinase, liver type OS=Homo sapiens OX=9606 GN=PFKL PE=1 SV=6
124	TRUE	Q7KZF4|SND1_HUMAN	378.951	37	37	202	203	1.00495	175	168	0.96	106	110	1.03774	95	69	0.726316	207	211	1.01932	177	193	1.0904	Carbamidomethylation; Oxidation (M)	101997	Staphylococcal nuclease domain-containing protein 1 OS=Homo sapiens OX=9606 GN=SND1 PE=1 SV=1
60	TRUE	P42224|STAT1_HUMAN	411.953	49	49	204	205	1.0049	825	854	1.03515	150	127	0.846667	716	639	0.892458	163	157	0.96319	545	663	1.21651	Oxidation (M); Carbamidomethylation	87334.8	Signal transducer and activator of transcription 1-alpha/beta OS=Homo sapiens OX=9606 GN=STAT1 PE=1 SV=2
74	TRUE	P38606|VATA_HUMAN	404.95	48	48	336	337	1.00298	383	413	1.07833	196	241	1.22959	205	242	1.18049	378	379	1.00265	274	314	1.14599	Oxidation (M); Carbamidomethylation	68304.1	V-type proton ATPase catalytic subunit A OS=Homo sapiens OX=9606 GN=ATP6V1A PE=1 SV=2
2157	TRUE	P01137|TGFB1_HUMAN	142.182	4	4		1	1		20	20	2				29	29		3	3		29	29		44341.2	Transforming growth factor beta-1 proprotein OS=Homo sapiens OX=9606 GN=TGFB1 PE=1 SV=2
1148	TRUE	Q9Y2K1|ZBTB1_HUMAN	219.502	11	11		1	1		21	21					11	11		2	2		27	27	Carbamidomethylation	82016	Zinc finger and BTB domain-containing protein 1 OS=Homo sapiens OX=9606 GN=ZBTB1 PE=1 SV=3
1934	TRUE	Q9BY77|PDIP3_HUMAN	156.617	6	6		1	1		8	8		5	5		11	11		9	9		21	21		46089.3	Polymerase delta-interacting protein 3 OS=Homo sapiens OX=9606 GN=POLDIP3 PE=1 SV=2
1673	TRUE	Q13772|NCOA4_HUMAN	174.66	6	6		1	1		21	21					4	4		8	8		17	17	Carbamidomethylation	69726.1	Nuclear receptor coactivator 4 OS=Homo sapiens OX=9606 GN=NCOA4 PE=1 SV=1
1700	TRUE	Q14156|EFR3A_HUMAN	172.483	9	9		1	1		23	23					2	2		6	6		15	15	Carbamidomethylation	92924.3	Protein EFR3 homolog A OS=Homo sapiens OX=9606 GN=EFR3A PE=1 SV=2
1298	TRUE	Q9NPP4|NLRC4_HUMAN	205.326	13	13	5	5	1	18	33	1.83333					3	3		2	2	2	26	13	Carbamidomethylation	116159	NLR family CARD domain-containing protein 4 OS=Homo sapiens OX=9606 GN=NLRC4 PE=1 SV=2
2053	TRUE	Q6P4A8|PLBL1_HUMAN	148.549	4	4		1	1		27	27	2	10	5	1	27	27	1	18	18		12	12	Carbamidomethylation	63254.8	Phospholipase B-like 1 OS=Homo sapiens OX=9606 GN=PLBD1 PE=1 SV=2
1783	TRUE	Q9UIG0|BAZ1B_HUMAN	166.143	9	9	1	1	1	5	12	2.4		1	1	1				1	1		12	12	Carbamidomethylation	170903	Tyrosine-protein kinase BAZ1B OS=Homo sapiens OX=9606 GN=BAZ1B PE=1 SV=2
2078	TRUE	Q9Y6H1|CHCH2_HUMAN	146.912	4	4	1	1	1		30	30	2	28	14		48	48		14	14		11	11	Carbamidomethylation	15512.6	Coiled-coil-helix-coiled-coil-helix domain-containing protein 2 OS=Homo sapiens OX=9606 GN=CHCHD2 PE=1 SV=1
1879	TRUE	Q9P2I0|CPSF2_HUMAN	160.532	7	7	1	1	1		13	13	1				3	3		3	3		10	10	Carbamidomethylation	88486.8	Cleavage and polyadenylation specificity factor subunit 2 OS=Homo sapiens OX=9606 GN=CPSF2 PE=1 SV=2
2078	FALSE	Q5T1J5|CHCH9_HUMAN	134.463	3	3	1	1	1		27	27	2	27	13.5		48	48		9	9		9	9	Carbamidomethylation	15489.6	Putative coiled-coil-helix-coiled-coil-helix domain-containing protein CHCHD2P9, mitochondrial OS=Homo sapiens OX=9606 GN=CHCHD2P9 PE=5 SV=1
2175	TRUE	Q9NTI5|PDS5B_HUMAN	141.025	5	5	3	3	1	8	11	1.375				2	3	1.5	4	6	1.5		9	9		164667	Sister chromatid cohesion protein PDS5 homolog B OS=Homo sapiens OX=9606 GN=PDS5B PE=1 SV=1
2253	TRUE	P04150|GCR_HUMAN	135.35	3	3		1	1	3	32	10.6667		2	2		31	31					8	8		85659.3	Glucocorticoid receptor OS=Homo sapiens OX=9606 GN=NR3C1 PE=1 SV=1
1676	TRUE	P08243|ASNS_HUMAN	174.52	8	8		1	1		22	22				1	31	31				4	29	7.25	Carbamidomethylation	64369.9	Asparagine synthetase [glutamine-hydrolyzing] OS=Homo sapiens OX=9606 GN=ASNS PE=1 SV=4
3063	TRUE	Q9BY42|RTF2_HUMAN	81.373	3	3		1	1		5	5		1	1		2	2		10	10		7	7	Carbamidomethylation	33886.7	Replication termination factor 2 OS=Homo sapiens OX=9606 GN=RTF2 PE=1 SV=3
680	FALSE	Q8N431|RGF1C_HUMAN	110.915	2	2		1	1		10	10		1	1		13	13		7	7		7	7	Carbamidomethylation	52869.8	Ras-GEF domain-containing family member 1C OS=Homo sapiens OX=9606 GN=RASGEF1C PE=2 SV=2
2287	TRUE	Q9P0K7|RAI14_HUMAN	132.941	6	6	4	4	1	1	10	10					3	3	1	5	5		7	7		110041	Ankycorbin OS=Homo sapiens OX=9606 GN=RAI14 PE=1 SV=2
2995	TRUE	P50749|RASF2_HUMAN	85.4649	2	2		1	1	1	2	2					6	6	2	8	4		6	6		37790.2	Ras association domain-containing protein 2 OS=Homo sapiens OX=9606 GN=RASSF2 PE=1 SV=1
2994	TRUE	Q9GZL7|WDR12_HUMAN	85.5855	2	2		1	1	1									2	4	2	1	6	6		47708	Ribosome biogenesis protein WDR12 OS=Homo sapiens OX=9606 GN=WDR12 PE=1 SV=2
2045	TRUE	Q96ST3|SIN3A_HUMAN	149.045	4	4		1	1		10	10					1	1		1	1		6	6		145175	Paired amphipathic helix protein Sin3a OS=Homo sapiens OX=9606 GN=SIN3A PE=1 SV=2
3188	TRUE	Q15018|ABRX2_HUMAN	72.8923	2	2	4	4	1	10	11	1.1	1	1	1		4	4		6	6	2	11	5.5		46900.8	BRISC complex subunit Abraxas 2 OS=Homo sapiens OX=9606 GN=ABRAXAS2 PE=1 SV=2
1901	TRUE	O00329|PK3CD_HUMAN	159.26	6	6		1	1	1	14	14					1	1	1	5	5		5	5	Carbamidomethylation	119479	Phosphatidylinositol 4,5-bisphosphate 3-kinase catalytic subunit delta isoform OS=Homo sapiens OX=9606 GN=PIK3CD PE=1 SV=2
2753	TRUE	Q96FS4|SIPA1_HUMAN	100.683	3	3	1	1	1	1	9	9								3	3		5	5		112149	Signal-induced proliferation-associated protein 1 OS=Homo sapiens OX=9606 GN=SIPA1 PE=1 SV=1
2703	TRUE	Q8IWA4|MFN1_HUMAN	103.424	3	3		1	1	1	10	10								1	1		5	5	Carbamidomethylation	84159.5	Mitofusin-1 OS=Homo sapiens OX=9606 GN=MFN1 PE=1 SV=3
2497	TRUE	Q01085|TIAR_HUMAN	116.672	6	4	1	1	1	1	3	3								1	1		5	5	Carbamidomethylation	41590.7	Nucleolysin TIAR OS=Homo sapiens OX=9606 GN=TIAL1 PE=1 SV=1
2356	TRUE	Q14790|CASP8_HUMAN	126.698	5	5		1	1	2	11	5.5					1	1	1			1	5	5	Carbamidomethylation	55391.1	Caspase-8 OS=Homo sapiens OX=9606 GN=CASP8 PE=1 SV=1
2083	TRUE	Q14677|EPN4_HUMAN	146.564	9	9	4	4	1	2	13	6.5					5	5	2	4	2	1	4	4		68259.4	Clathrin interactor 1 OS=Homo sapiens OX=9606 GN=CLINT1 PE=1 SV=1
1429	TRUE	Q8N0Y7|PGAM4_HUMAN	195.395	6	1	58	33	0.568966	36	29	0.805556	24	24	1	27	15	0.555556	25	28	1.12	27	35	1.2963	Oxidation (M)	28776.9	Probable phosphoglycerate mutase 4 OS=Homo sapiens OX=9606 GN=PGAM4 PE=3 SV=1
2959	TRUE	Q8WTS6|SETD7_HUMAN	87.4587	2	2	1	1	1	1	5	5								2	2	1	4	4		40720.8	Histone-lysine N-methyltransferase SETD7 OS=Homo sapiens OX=9606 GN=SETD7 PE=1 SV=1
2072	TRUE	Q9BU23|LMF2_HUMAN	147.187	4	4	4	4	1	14	14	1							1	2	2	2	8	4		79697.9	Lipase maturation factor 2 OS=Homo sapiens OX=9606 GN=LMF2 PE=1 SV=2
2507	TRUE	O95478|NSA2_HUMAN	116.116	3	3	5	5	1	2	3	1.5		2	2	1			5	8	1.6	1	4	4	Carbamidomethylation	30065.5	Ribosome biogenesis protein NSA2 homolog OS=Homo sapiens OX=9606 GN=NSA2 PE=1 SV=1
2448	TRUE	Q9C0D3|ZY11B_HUMAN	120.157	5	5		1	1		8	8					2	2		1	1		4	4	Carbamidomethylation	83921	Protein zyg-11 homolog B OS=Homo sapiens OX=9606 GN=ZYG11B PE=1 SV=2
2781	TRUE	Q5VTR2|BRE1A_HUMAN	99.1055	3	2		1	1		6	6								1	1		4	4		113662	E3 ubiquitin-protein ligase BRE1A OS=Homo sapiens OX=9606 GN=RNF20 PE=1 SV=2
2735	TRUE	Q9UBB4|ATX10_HUMAN	101.608	3	3	7	7	1	5	25	5	5	6	1.2		17	17	14	20	1.42857	4	15	3.75	Carbamidomethylation	53488.7	Ataxin-10 OS=Homo sapiens OX=9606 GN=ATXN10 PE=1 SV=1
1634	TRUE	P19784|CSK22_HUMAN	178.152	8	8	4	4	1	3	13	4.33333		1	1		1	1	5	12	2.4	3	11	3.66667	Carbamidomethylation	41213.2	Casein kinase II subunit alpha' OS=Homo sapiens OX=9606 GN=CSNK2A2 PE=1 SV=1
1511	TRUE	P08631|HCK_HUMAN	189.009	11	10	10	10	1	21	43	2.04762	23	14	0.608696	41	34	0.829268	10	18	1.8	9	32	3.55556	Carbamidomethylation	59599.8	Tyrosine-protein kinase HCK OS=Homo sapiens OX=9606 GN=HCK PE=1 SV=5
2999	TRUE	Q9Y646|CBPQ_HUMAN	85.2591	2	2		1	1		9	9							4	17	4.25	4	14	3.5		51887.6	Carboxypeptidase Q OS=Homo sapiens OX=9606 GN=CPQ PE=1 SV=1
2257	TRUE	Q96RU3|FNBP1_HUMAN	135.144	5	5		1	1	6	8	1.33333	1			1			1	3	3	2	7	3.5	Carbamidomethylation	71306.8	Formin-binding protein 1 OS=Homo sapiens OX=9606 GN=FNBP1 PE=1 SV=2
2942	TRUE	Q8IZ69|TRM2A_HUMAN	88.821	2	2		1	1										7	5	0.714286	2	7	3.5	Carbamidomethylation	68725.6	tRNA (uracil-5-)-methyltransferase homolog A OS=Homo sapiens OX=9606 GN=TRMT2A PE=1 SV=2
1646	TRUE	P04066|FUCO_HUMAN	176.78	7	7	12	12	1	19	29	1.52632	2	1	0.5				23	27	1.17391	8	27	3.375		53688.9	Tissue alpha-L-fucosidase OS=Homo sapiens OX=9606 GN=FUCA1 PE=1 SV=4
2148	TRUE	Q6ZT07|TBCD9_HUMAN	142.691	7	6		1	1		7	7								8	8		3	3	Carbamidomethylation	143229	TBC1 domain family member 9 OS=Homo sapiens OX=9606 GN=TBC1D9 PE=2 SV=2
2484	TRUE	Q9NV70|EXOC1_HUMAN	117.33	5	5	3	3	1	4	11	2.75					1	1		4	4	1	3	3		101982	Exocyst complex component 1 OS=Homo sapiens OX=9606 GN=EXOC1 PE=1 SV=4
2434	TRUE	Q9UHX3|AGRE2_HUMAN	121.119	3	2		1	1	1	6	6	1	1	1		21	21		3	3		3	3	Carbamidomethylation	90471.9	Adhesion G protein-coupled receptor E2 OS=Homo sapiens OX=9606 GN=ADGRE2 PE=1 SV=2
2327	TRUE	Q99447|PCY2_HUMAN	129.392	5	5	2	2	1	3	8	2.66667					4	4	1	2	2		3	3		43835.5	Ethanolamine-phosphate cytidylyltransferase OS=Homo sapiens OX=9606 GN=PCYT2 PE=1 SV=1
2706	TRUE	P17480|UBF1_HUMAN	103.112	3	3	1	1	1		2	2	2	1	0.5		1	1		2	2		3	3		89405.9	Nucleolar transcription factor 1 OS=Homo sapiens OX=9606 GN=UBTF PE=1 SV=1
3151	TRUE	Q6UWE0|LRSM1_HUMAN	76.0737	2	2		1	1		4	4								2	2		3	3		83593.9	E3 ubiquitin-protein ligase LRSAM1 OS=Homo sapiens OX=9606 GN=LRSAM1 PE=1 SV=1
2352	TRUE	P86791|CCZ1_HUMAN	126.848	4	4		1	1	3	13	4.33333					4	4	3	5	1.66667	2	6	3		55866.2	Vacuolar fusion protein CCZ1 homolog OS=Homo sapiens OX=9606 GN=CCZ1 PE=1 SV=1
2352	TRUE	P86790|CCZ1B_HUMAN	126.848	4	4		1	1	3	13	4.33333					4	4	3	5	1.66667	2	6	3		55866.2	Vacuolar fusion protein CCZ1 homolog B OS=Homo sapiens OX=9606 GN=CCZ1B PE=1 SV=1
2511	TRUE	Q13242|SRSF9_HUMAN	115.851	3	3		1	1		4	4	2	7	3.5		7	7	2	3	1.5		3	3	Carbamidomethylation	25542.2	Serine/arginine-rich splicing factor 9 OS=Homo sapiens OX=9606 GN=SRSF9 PE=1 SV=1
3206	TRUE	Q9BSH4|TACO1_HUMAN	71.3729	2	2		1	1	1	4	4	1	1	1				2	3	1.5	1	3	3	Carbamidomethylation	32477.1	Translational activator of cytochrome c oxidase 1 OS=Homo sapiens OX=9606 GN=TACO1 PE=1 SV=1
1808	TRUE	Q92747|ARC1A_HUMAN	164.583	5	1	18	10	0.555556	16	15	0.9375	6	8	1.33333	1	8	8	13	10	0.769231	7	9	1.28571	Carbamidomethylation	41569.3	Actin-related protein 2/3 complex subunit 1A OS=Homo sapiens OX=9606 GN=ARPC1A PE=1 SV=2
2206	TRUE	Q7Z3U7|MON2_HUMAN	138.802	3	3	2	2	1	2	19	9.5							2	3	1.5		3	3		190359	Protein MON2 homolog OS=Homo sapiens OX=9606 GN=MON2 PE=1 SV=3
1368	TRUE	Q9Y2L1|RRP44_HUMAN	200.479	11	11	10	10	1	5	23	4.6	1						8	12	1.5	7	21	3	Carbamidomethylation	109003	Exosome complex exonuclease RRP44 OS=Homo sapiens OX=9606 GN=DIS3 PE=1 SV=2
1941	TRUE	Q14694|UBP10_HUMAN	156.142	6	6	5	5	1	4	4	1					1	1	6	8	1.33333	1	3	3	Carbamidomethylation	87133.8	Ubiquitin carboxyl-terminal hydrolase 10 OS=Homo sapiens OX=9606 GN=USP10 PE=1 SV=2
2941	TRUE	Q6DN90|IQEC1_HUMAN	88.9231	4	4	1	1	1	1	4	4								1	1		3	3		108314	IQ motif and SEC7 domain-containing protein 1 OS=Homo sapiens OX=9606 GN=IQSEC1 PE=1 SV=1
2817	TRUE	P13807|GYS1_HUMAN	97.1648	2	2		1	1	1	2	2				1				1	1	1	3	3		83785.5	Glycogen [starch] synthase, muscle OS=Homo sapiens OX=9606 GN=GYS1 PE=1 SV=2
2547	TRUE	Q96EQ0|SGTB_HUMAN	113.634	3	3	1	1	1	1	9	9				2	7	3.5	1				3	3	Carbamidomethylation	33429.4	Small glutamine-rich tetratricopeptide repeat-containing protein beta OS=Homo sapiens OX=9606 GN=SGTB PE=1 SV=1
3128	TRUE	P61956|SUMO2_HUMAN	77.75	1	1	6	3	0.5	7	5	0.714286	3	2	0.666667	5	4	0.8	23	12	0.521739	7	9	1.28571		10871.2	Small ubiquitin-related modifier 2 OS=Homo sapiens OX=9606 GN=SUMO2 PE=1 SV=3
3128	TRUE	Q6EEV6|SUMO4_HUMAN	77.75	1	1	6	3	0.5	7	5	0.714286	3	2	0.666667	5	4	0.8	23	12	0.521739	7	9	1.28571		10685.1	Small ubiquitin-related modifier 4 OS=Homo sapiens OX=9606 GN=SUMO4 PE=1 SV=2
3128	TRUE	P55854|SUMO3_HUMAN	77.75	1	1	6	3	0.5	7	5	0.714286	3	2	0.666667	5	4	0.8	23	12	0.521739	7	9	1.28571		11637	Small ubiquitin-related modifier 3 OS=Homo sapiens OX=9606 GN=SUMO3 PE=1 SV=2
2025	TRUE	Q9BQA9|CYBC1_HUMAN	150.175	3	3	4	4	1	8	12	1.5					2	2					3	3		20773.8	Cytochrome b-245 chaperone 1 OS=Homo sapiens OX=9606 GN=CYBC1 PE=1 SV=1
639	TRUE	P08134|RHOC_HUMAN	271.629	11	1	94	64	0.680851	86	97	1.12791	48	51	1.0625	43	41	0.953488	51	54	1.05882	46	59	1.28261	Carbamidomethylation	22006.4	Rho-related GTP-binding protein RhoC OS=Homo sapiens OX=9606 GN=RHOC PE=1 SV=1
1997	TRUE	Q13287|NMI_HUMAN	152.014	7	7		1	1	3	12	4	1			9	15	1.66667				3	9	3	Carbamidomethylation	35056.8	N-myc-interactor OS=Homo sapiens OX=9606 GN=NMI PE=1 SV=2
2076	TRUE	Q96PU8|QKI_HUMAN	147.049	5	5	2	2	1	3	10	3.33333	3	7	2.33333	1	24	24	6	5	0.833333	3	8	2.66667		37670.6	Protein quaking OS=Homo sapiens OX=9606 GN=QKI PE=1 SV=1
976	TRUE	Q66K74|MAP1S_HUMAN	234.923	13	13	13	13	1	15	16	1.06667				1	3	3	17	14	0.823529	6	16	2.66667	Carbamidomethylation	112211	Microtubule-associated protein 1S OS=Homo sapiens OX=9606 GN=MAP1S PE=1 SV=2
1972	TRUE	Q96N67|DOCK7_HUMAN	154.168	7	4	4	4	1	10	15	1.5							2	2	1	2	5	2.5		242561	Dedicator of cytokinesis protein 7 OS=Homo sapiens OX=9606 GN=DOCK7 PE=1 SV=4
1444	TRUE	Q9UHX1|PUF60_HUMAN	194.549	9	9	11	11	1	8	16	2		4	4		1	1	13	20	1.53846	9	22	2.44444	Carbamidomethylation	59875.5	Poly(U)-binding-splicing factor PUF60 OS=Homo sapiens OX=9606 GN=PUF60 PE=1 SV=1
1095	TRUE	Q15042|RB3GP_HUMAN	223.543	13	13	12	12	1	10	29	2.9	5	7	1.4		5	5	10	12	1.2	9	22	2.44444	Carbamidomethylation	110524	Rab3 GTPase-activating protein catalytic subunit OS=Homo sapiens OX=9606 GN=RAB3GAP1 PE=1 SV=3
1754	TRUE	Q9Y2H6|FND3A_HUMAN	168.104	6	6	2	2	1	6	29	4.83333					1	1	9	11	1.22222	4	9	2.25	Carbamidomethylation	131852	Fibronectin type-III domain-containing protein 3A OS=Homo sapiens OX=9606 GN=FNDC3A PE=1 SV=4
845	TRUE	Q96CM8|ACSF2_HUMAN	249.028	14	14	16	16	1	6	28	4.66667	2	2	1		4	4	29	27	0.931034	13	29	2.23077	Carbamidomethylation	68124.8	Medium-chain acyl-CoA ligase ACSF2, mitochondrial OS=Homo sapiens OX=9606 GN=ACSF2 PE=1 SV=2
528	FALSE	O00507|USP9Y_HUMAN	226.755	14	14	29	29	1	27	53	1.96296	2	2	1	1	9	9	10	11	1.1	10	22	2.2	Carbamidomethylation	291077	Probable ubiquitin carboxyl-terminal hydrolase FAF-Y OS=Homo sapiens OX=9606 GN=USP9Y PE=2 SV=2
2233	TRUE	P36507|MP2K2_HUMAN	137.142	4	2	2	2	1	1	8	8	1				1	1	10	12	1.2	9	19	2.11111	Carbamidomethylation	44424.1	Dual specificity mitogen-activated protein kinase kinase 2 OS=Homo sapiens OX=9606 GN=MAP2K2 PE=1 SV=1
963	TRUE	O60568|PLOD3_HUMAN	236.327	11	11	11	11	1	18	35	1.94444	13	9	0.692308	15	19	1.26667	15	20	1.33333	23	48	2.08696		84785.1	Multifunctional procollagen lysine hydroxylase and glycosyltransferase LH3 OS=Homo sapiens OX=9606 GN=PLOD3 PE=1 SV=1
2865	TRUE	Q9Y5Y6|ST14_HUMAN	93.6607	3	3		1	1		1	1					1	1	1	3	3		2	2		94769.7	Suppressor of tumorigenicity 14 protein OS=Homo sapiens OX=9606 GN=ST14 PE=1 SV=2
1322	FALSE	Q9P289|STK26_HUMAN	100.473	2	2		1	1		1	1					3	3	3	8	2.66667	7	14	2		46528.8	Serine/threonine-protein kinase 26 OS=Homo sapiens OX=9606 GN=STK26 PE=1 SV=2
2723	TRUE	Q96BR1|SGK3_HUMAN	102.212	3	3	1	1	1	1	8	8	1						4	9	2.25	2	4	2	Carbamidomethylation	57108.2	Serine/threonine-protein kinase Sgk3 OS=Homo sapiens OX=9606 GN=SGK3 PE=1 SV=1
808	TRUE	P58107|EPIPL_HUMAN	252.019	7	1	41	41	1	38	33	0.868421	9	1	0.111111	2	7	3.5	21	22	1.04762	15	19	1.26667	Oxidation (M)	555658	Epiplakin OS=Homo sapiens OX=9606 GN=EPPK1 PE=1 SV=3
1937	FALSE	Q13434|MKRN4_HUMAN	76.6063	2	2		1	1		5	5					4	4		2	2		2	2		52909.7	Putative E3 ubiquitin-protein ligase makorin-4 OS=Homo sapiens OX=9606 GN=MKRN4P PE=5 SV=1
3286	TRUE	Q70UQ0|IKIP_HUMAN	67.181	2	2		1	1		4	4	1	2	2	4				2	2		2	2		39309	Inhibitor of nuclear factor kappa-B kinase-interacting protein OS=Homo sapiens OX=9606 GN=IKBIP PE=1 SV=1
2954	TRUE	Q8N3D4|EH1L1_HUMAN	87.6267	5	5		1	1		3	3							1	2	2	1	2	2		161854	EH domain-binding protein 1-like protein 1 OS=Homo sapiens OX=9606 GN=EHBP1L1 PE=1 SV=2
2958	TRUE	Q8TBA6|GOGA5_HUMAN	87.5059	3	3		1	1	1	2	2							1	2	2	1	2	2		83024.4	Golgin subfamily A member 5 OS=Homo sapiens OX=9606 GN=GOLGA5 PE=1 SV=3
2280	TRUE	O00139|KIF2A_HUMAN	133.915	4	4	7	7	1	3	4	1.33333							1	2	2		2	2		79954.5	Kinesin-like protein KIF2A OS=Homo sapiens OX=9606 GN=KIF2A PE=1 SV=3
1988	TRUE	P52948|NUP98_HUMAN	152.604	8	8	5	5	1	1	12	12							5	6	1.2	3	6	2	Carbamidomethylation	197579	Nuclear pore complex protein Nup98-Nup96 OS=Homo sapiens OX=9606 GN=NUP98 PE=1 SV=4
2307	TRUE	Q9Y2K7|KDM2A_HUMAN	131.228	7	7		1	1		15	15		1	1		5	5		1	1		2	2		132793	Lysine-specific demethylase 2A OS=Homo sapiens OX=9606 GN=KDM2A PE=1 SV=3
2988	TRUE	Q8NFG4|FLCN_HUMAN	85.8881	2	2		1	1		7	7								1	1		2	2	Carbamidomethylation	64473.3	Folliculin OS=Homo sapiens OX=9606 GN=FLCN PE=1 SV=1
1293	TRUE	Q5TFQ8|SIRBL_HUMAN	205.75	8	1	19	16	0.842105	24	26	1.08333		1	1	2	1	0.5	26	35	1.34615	23	29	1.26087	Carbamidomethylation	43359.3	Signal-regulatory protein beta-1 isoform 3 OS=Homo sapiens OX=9606 GN=SIRPB1 PE=1 SV=1
2625	TRUE	Q8TF05|PP4R1_HUMAN	109.286	3	3		1	1	3	7	2.33333							2	2	1		2	2		107004	Serine/threonine-protein phosphatase 4 regulatory subunit 1 OS=Homo sapiens OX=9606 GN=PPP4R1 PE=1 SV=1
1946	TRUE	Q8N3C0|ASCC3_HUMAN	155.928	11	11	6	6	1	8	10	1.25								1	1		2	2	Carbamidomethylation	251460	Activating signal cointegrator 1 complex subunit 3 OS=Homo sapiens OX=9606 GN=ASCC3 PE=1 SV=3
2095	TRUE	Q9H583|HEAT1_HUMAN	145.943	8	8	3	3	1	3	3	1							1	1	1	2	4	2		242370	HEAT repeat-containing protein 1 OS=Homo sapiens OX=9606 GN=HEATR1 PE=1 SV=3
2857	TRUE	P35236|PTN7_HUMAN	94.475	2	2		1	1				2							1	1		2	2	Carbamidomethylation	40529.2	Tyrosine-protein phosphatase non-receptor type 7 OS=Homo sapiens OX=9606 GN=PTPN7 PE=1 SV=3
2894	TRUE	Q9UJY5|GGA1_HUMAN	92.1291	3	3	4	4	1	4	8	2							6	5	0.833333		2	2		70384.2	ADP-ribosylation factor-binding protein GGA1 OS=Homo sapiens OX=9606 GN=GGA1 PE=1 SV=1
2889	TRUE	Q96TA2|YMEL1_HUMAN	92.4787	4	4		1	1		2	2	1	1	1				3	2	0.666667		2	2	Carbamidomethylation	86455.3	ATP-dependent zinc metalloprotease YME1L1 OS=Homo sapiens OX=9606 GN=YME1L1 PE=1 SV=2
366	FALSE	Q92995|UBP13_HUMAN	57.6337	1	1	3	5	1.66667	2	4	2							4	6	1.5	4	5	1.25		97327.1	Ubiquitin carboxyl-terminal hydrolase 13 OS=Homo sapiens OX=9606 GN=USP13 PE=1 SV=2
2823	TRUE	Q9BXW7|HDHD5_HUMAN	97.0073	2	2		1	1	2	6	3							5	2	0.4	2	4	2		46321.5	Haloacid dehalogenase-like hydrolase domain-containing 5 OS=Homo sapiens OX=9606 GN=HDHD5 PE=1 SV=1
3698	TRUE	Q9H0J4|QRIC2_HUMAN	46.6459	2	2		1	1				2	1	0.5				2			1	2	2	Oxidation (M)	180827	Glutamine-rich protein 2 OS=Homo sapiens OX=9606 GN=QRICH2 PE=1 SV=1
1847	TRUE	P17693|HLAG_HUMAN	162.094	4	1	12	18	1.5	18	31	1.72222	9	6	0.666667	3	18	6	12	16	1.33333	16	20	1.25	Carbamidomethylation	38224.1	HLA class I histocompatibility antigen, alpha chain G OS=Homo sapiens OX=9606 GN=HLA-G PE=1 SV=1
2922	TRUE	Q12849|GRSF1_HUMAN	90.2138	3	3		1	1		5	5							1				2	2		53126.3	G-rich sequence factor 1 OS=Homo sapiens OX=9606 GN=GRSF1 PE=1 SV=3
2877	TRUE	Q9Y285|SYFA_HUMAN	92.9648	3	3	1	1	1	1	1	1							3			2	4	2		57563.6	Phenylalanine--tRNA ligase alpha subunit OS=Homo sapiens OX=9606 GN=FARSA PE=1 SV=3
611	TRUE	O95479|G6PE_HUMAN	275.72	16	16	41	41	1	58	64	1.10345	15	14	0.933333	12	25	2.08333	29	45	1.55172	25	48	1.92	Carbamidomethylation	88892.7	GDH/6PGL endoplasmic bifunctional protein OS=Homo sapiens OX=9606 GN=H6PD PE=1 SV=2
1616	TRUE	Q96KP1|EXOC2_HUMAN	179.78	8	8	14	14	1	18	22	1.22222				1			22	23	1.04545	12	23	1.91667		104066	Exocyst complex component 2 OS=Homo sapiens OX=9606 GN=EXOC2 PE=1 SV=1
1565	TRUE	P10155|RO60_HUMAN	184.433	6	6	16	16	1	17	21	1.23529	9	10	1.11111	6	4	0.666667	13	12	0.923077	9	17	1.88889	Carbamidomethylation	60670.6	60 kDa SS-A/Ro ribonucleoprotein OS=Homo sapiens OX=9606 GN=RO60 PE=1 SV=2
1542	TRUE	Q9NZ32|ARP10_HUMAN	186.407	7	7	22	22	1	29	27	0.931034	5	2	0.4		11	11	26	29	1.11538	17	32	1.88235	Carbamidomethylation	46307	Actin-related protein 10 OS=Homo sapiens OX=9606 GN=ACTR10 PE=1 SV=1
1136	TRUE	Q9NZD8|SPG21_HUMAN	220.596	12	12	23	23	1	26	29	1.11538	15	19	1.26667	11	31	2.81818	19	31	1.63158	16	30	1.875	Carbamidomethylation; Oxidation (M)	34960.1	Maspardin OS=Homo sapiens OX=9606 GN=SPG21 PE=1 SV=1
2761	TRUE	Q9UNQ0|ABCG2_HUMAN	100.444	2	2		1	1										6	11	1.83333	3	5	1.66667		72314.2	Broad substrate specificity ATP-binding cassette transporter ABCG2 OS=Homo sapiens OX=9606 GN=ABCG2 PE=1 SV=3
2604	TRUE	Q9Y450|HBS1L_HUMAN	110.476	4	4		1	1		1	1							10	7	0.7	3	5	1.66667		75472.9	HBS1-like protein OS=Homo sapiens OX=9606 GN=HBS1L PE=1 SV=1
2238	FALSE	P63027|VAMP2_HUMAN	94.0111	1	1	7	4	0.571429	5	4	0.8	4	5	1.25	3	5	1.66667	3	3	1	4	5	1.25		12662.7	Vesicle-associated membrane protein 2 OS=Homo sapiens OX=9606 GN=VAMP2 PE=1 SV=3
2918	TRUE	P78356|PI42B_HUMAN	90.4868	2	1							11	7	0.636364	12	15	1.25	6	6	1	4	5	1.25		47378	Phosphatidylinositol 5-phosphate 4-kinase type-2 beta OS=Homo sapiens OX=9606 GN=PIP4K2B PE=1 SV=1
3011	TRUE	O43290|SNUT1_HUMAN	84.3462	3	3		1	1		1	1							2			3	5	1.66667		90254.8	U4/U6.U5 tri-snRNP-associated protein 1 OS=Homo sapiens OX=9606 GN=SART1 PE=1 SV=1
2232	TRUE	Q08752|PPID_HUMAN	137.218	4	4	8	8	1	9	22	2.44444	1			1	4	4	7	12	1.71429	10	16	1.6	Carbamidomethylation	40763.6	Peptidyl-prolyl cis-trans isomerase D OS=Homo sapiens OX=9606 GN=PPID PE=1 SV=3
1742	TRUE	P49721|PSB2_HUMAN	168.948	5	5	8	8	1	11	12	1.09091	9	28	3.11111	10	11	1.1	4	6	1.5	8	12	1.5		22836.3	Proteasome subunit beta type-2 OS=Homo sapiens OX=9606 GN=PSMB2 PE=1 SV=1
478	TRUE	O60610|DIAP1_HUMAN	294.005	19	19	35	35	1	53	71	1.33962		3	3		3	3	23	31	1.34783	34	51	1.5	Carbamidomethylation	141347	Protein diaphanous homolog 1 OS=Homo sapiens OX=9606 GN=DIAPH1 PE=1 SV=2
415	FALSE	P35558|PCKGC_HUMAN	104.558	2	2	5	5	1	4	7	1.75				1	6	6	5	6	1.2	4	6	1.5		69194.5	Phosphoenolpyruvate carboxykinase, cytosolic [GTP] OS=Homo sapiens OX=9606 GN=PCK1 PE=1 SV=3
448	FALSE	P0DN37|PAL4G_HUMAN	106.454	2	2	9	9	1	13	9	0.692308	9	7	0.777778		19	19	15	14	0.933333	6	9	1.5	Carbamidomethylation	18165.7	Peptidyl-prolyl cis-trans isomerase A-like 4G OS=Homo sapiens OX=9606 GN=PPIAL4G PE=3 SV=1
1668	TRUE	O00161|SNP23_HUMAN	175.136	7	7	9	9	1	13	10	0.769231	9	13	1.44444	7	14	2	10	9	0.9	12	18	1.5	Oxidation (M); Carbamidomethylation	23354	Synaptosomal-associated protein 23 OS=Homo sapiens OX=9606 GN=SNAP23 PE=1 SV=1
452	TRUE	P31146|COR1A_HUMAN	297.535	16	16	84	84	1	109	115	1.05505	58	41	0.706897	42	52	1.2381	39	33	0.846154	22	33	1.5	Carbamidomethylation	51026.2	Coronin-1A OS=Homo sapiens OX=9606 GN=CORO1A PE=1 SV=4
1948	TRUE	Q9Y4W6|AFG32_HUMAN	155.752	8	8	3	3	1		5	5	1						9	3	0.333333	8	12	1.5	Carbamidomethylation	88583.7	AFG3-like protein 2 OS=Homo sapiens OX=9606 GN=AFG3L2 PE=1 SV=2
938	TRUE	P40306|PSB10_HUMAN	238.911	8	8	19	19	1	28	26	0.928571	18	11	0.611111	36	53	1.47222	15	14	0.933333	24	35	1.45833	Carbamidomethylation; Oxidation (M)	28936.3	Proteasome subunit beta type-10 OS=Homo sapiens OX=9606 GN=PSMB10 PE=1 SV=1
825	TRUE	P12081|HARS1_HUMAN	250.114	12	12	32	32	1	46	42	0.913043	33	21	0.636364	26	25	0.961538	28	32	1.14286	20	29	1.45	Carbamidomethylation	57410.5	Histidine--tRNA ligase, cytoplasmic OS=Homo sapiens OX=9606 GN=HARS1 PE=1 SV=2
1530	TRUE	P55145|MANF_HUMAN	187.293	5	5	17	17	1	20	14	0.7	25	15	0.6		10	10	6	9	1.5	10	14	1.4	Carbamidomethylation	20700.1	Mesencephalic astrocyte-derived neurotrophic factor OS=Homo sapiens OX=9606 GN=MANF PE=1 SV=3
1893	TRUE	O95674|CDS2_HUMAN	159.58	3	3	9	9	1	16	19	1.1875	12	13	1.08333	16	11	0.6875	22	21	0.954545	13	18	1.38462		51418	Phosphatidate cytidylyltransferase 2 OS=Homo sapiens OX=9606 GN=CDS2 PE=1 SV=1
1479	TRUE	Q04446|GLGB_HUMAN	191.825	9	9	4	4	1		7	7							17	31	1.82353	8	11	1.375		80473.9	1,4-alpha-glucan-branching enzyme OS=Homo sapiens OX=9606 GN=GBE1 PE=1 SV=3
2379	TRUE	Q13136|LIPA1_HUMAN	124.452	6	6	2	2	1		11	11					2	2		6	6	3	4	1.33333		135779	Liprin-alpha-1 OS=Homo sapiens OX=9606 GN=PPFIA1 PE=1 SV=1
2527	TRUE	Q9BZE4|NOG1_HUMAN	114.95	4	4		1	1	6	3	0.5	1	1	1				1	3	3	3	4	1.33333		73964.5	Nucleolar GTP-binding protein 1 OS=Homo sapiens OX=9606 GN=GTPBP4 PE=1 SV=3
704	FALSE	O15084|ANR28_HUMAN	123.918	2	2	4	4	1	7	10	1.42857					1	1	3	6	2	3	4	1.33333		112966	Serine/threonine-protein phosphatase 6 regulatory ankyrin repeat subunit A OS=Homo sapiens OX=9606 GN=ANKRD28 PE=1 SV=5
2295	TRUE	P34910|EVI2B_HUMAN	131.785	3	3	3	3	1	10	6	0.6	9	10	1.11111	6	6	1	9	10	1.11111	9	12	1.33333	Carbamidomethylation; Oxidation (M)	48666.2	Protein EVI2B OS=Homo sapiens OX=9606 GN=EVI2B PE=1 SV=2
2639	TRUE	Q9BX59|TPSNR_HUMAN	108.57	2	2	1	1	1	7	5	0.714286							2	2	1	3	4	1.33333		50183.1	Tapasin-related protein OS=Homo sapiens OX=9606 GN=TAPBPL PE=1 SV=2
1078	TRUE	Q9H2G2|SLK_HUMAN	225.553	14	13	19	19	1	19	20	1.05263	1			1	4	4	24	21	0.875	15	20	1.33333	Carbamidomethylation	142695	STE20-like serine/threonine-protein kinase OS=Homo sapiens OX=9606 GN=SLK PE=1 SV=1
2062	FALSE	P0C7P4|UCRIL_HUMAN	127.16	3	3	18	18	1	17	22	1.29412	1			1			5	4	0.8	9	12	1.33333		30815.4	Putative cytochrome b-c1 complex subunit Rieske-like protein 1 OS=Homo sapiens OX=9606 GN=UQCRFS1P1 PE=5 SV=1
2021	TRUE	Q4KMQ2|ANO6_HUMAN	150.345	6	6	3	3	1	4	12	3	1				1	1	9	7	0.777778	6	8	1.33333	Carbamidomethylation	106165	Anoctamin-6 OS=Homo sapiens OX=9606 GN=ANO6 PE=1 SV=2
2429	TRUE	Q71UI9|H2AV_HUMAN	121.261	4	4	5	5	1	9	5	0.555556	2	1	0.5	3	1	0.333333	4	1	0.25	3	4	1.33333		13508.7	Histone H2A.V OS=Homo sapiens OX=9606 GN=H2AZ2 PE=1 SV=3
2429	TRUE	P0C0S5|H2AZ_HUMAN	121.261	4	4	5	5	1	9	5	0.555556	2	1	0.5	3	1	0.333333	4	1	0.25	3	4	1.33333		13552.7	Histone H2A.Z OS=Homo sapiens OX=9606 GN=H2AZ1 PE=1 SV=2
869	TRUE	A1L0T0|HACL2_HUMAN	246.325	10	10	30	30	1	42	32	0.761905	4	3	0.75		4	4	32	33	1.03125	23	30	1.30435	Carbamidomethylation	67867.7	2-hydroxyacyl-CoA lyase 2 OS=Homo sapiens OX=9606 GN=ILVBL PE=1 SV=2
1894	TRUE	Q9UBQ0|VPS29_HUMAN	159.474	4	4	14	14	1	19	15	0.789474	6	1	0.166667	8	8	1	14	10	0.714286	10	13	1.3		20505.7	Vacuolar protein sorting-associated protein 29 OS=Homo sapiens OX=9606 GN=VPS29 PE=1 SV=1
2102	TRUE	Q9BTZ2|DHRS4_HUMAN	145.76	4	4	5	5	1	12	12	1							3	6	2	7	9	1.28571	Carbamidomethylation	29537.1	Dehydrogenase/reductase SDR family member 4 OS=Homo sapiens OX=9606 GN=DHRS4 PE=1 SV=3
2102	FALSE	Q6PKH6|DR4L2_HUMAN	125.903	3	3	5	5	1	6	4	0.666667							3	6	2	7	9	1.28571	Carbamidomethylation	24585.6	Dehydrogenase/reductase SDR family member 4-like 2 OS=Homo sapiens OX=9606 GN=DHRS4L2 PE=2 SV=1
375	FALSE	O15523|DDX3Y_HUMAN	288.807	15	13	69	69	1	56	94	1.67857	83	100	1.20482	74	82	1.10811	57	60	1.05263	54	69	1.27778	Carbamidomethylation; Oxidation (M)	73153.6	ATP-dependent RNA helicase DDX3Y OS=Homo sapiens OX=9606 GN=DDX3Y PE=1 SV=2
659	TRUE	Q9BTV4|TMM43_HUMAN	268.152	13	13	54	54	1	51	53	1.03922	19	14	0.736842	3	25	8.33333	19	22	1.15789	22	28	1.27273		44875.5	Transmembrane protein 43 OS=Homo sapiens OX=9606 GN=TMEM43 PE=1 SV=1
2491	TRUE	Q9H7Z7|PGES2_HUMAN	116.975	3	3		1	1		2	2							3	3	1	4	5	1.25		41943.1	Prostaglandin E synthase 2 OS=Homo sapiens OX=9606 GN=PTGES2 PE=1 SV=1
3095	TRUE	Q9UBI1|COMD3_HUMAN	79.3569	2	2		1	1	1	5	5										4	5	1.25		22151.1	COMM domain-containing protein 3 OS=Homo sapiens OX=9606 GN=COMMD3 PE=1 SV=1
537	TRUE	P17980|PRS6A_HUMAN	285.46	14	14	52	52	1	62	73	1.17742	15	30	2	11	29	2.63636	55	53	0.963636	49	60	1.22449	Oxidation (M); Carbamidomethylation	49203.5	26S proteasome regulatory subunit 6A OS=Homo sapiens OX=9606 GN=PSMC3 PE=1 SV=3
1541	TRUE	Q86Y82|STX12_HUMAN	186.433	6	6	27	27	1	23	29	1.26087	49	23	0.469388	25	33	1.32	17	20	1.17647	27	33	1.22222	Carbamidomethylation; Oxidation (M)	31641.9	Syntaxin-12 OS=Homo sapiens OX=9606 GN=STX12 PE=1 SV=1
315	TRUE	P43304|GPDM_HUMAN	323.754	26	26	113	113	1	104	117	1.125	63	40	0.634921	33	30	0.909091	70	64	0.914286	64	78	1.21875	Carbamidomethylation	80852.7	Glycerol-3-phosphate dehydrogenase, mitochondrial OS=Homo sapiens OX=9606 GN=GPD2 PE=1 SV=3
1172	TRUE	P62826|RAN_HUMAN	216.643	7	7	32	32	1	28	48	1.71429	32	22	0.6875	17	19	1.11765	41	43	1.04878	38	46	1.21053	Carbamidomethylation	24423.1	GTP-binding nuclear protein Ran OS=Homo sapiens OX=9606 GN=RAN PE=1 SV=3
572	TRUE	O00182|LEG9_HUMAN	280.839	16	9	81	81	1	66	93	1.40909	52	83	1.59615	23	95	4.13043	105	101	0.961905	83	100	1.20482	Carbamidomethylation; Oxidation (M)	39518.2	Galectin-9 OS=Homo sapiens OX=9606 GN=LGALS9 PE=1 SV=2
2833	TRUE	Q8TB22|SPT20_HUMAN	96.4159	2	2		1	1		2	2							3	12	4	5	6	1.2		87898.7	Spermatogenesis-associated protein 20 OS=Homo sapiens OX=9606 GN=SPATA20 PE=2 SV=3
2210	TRUE	Q96DB5|RMD1_HUMAN	138.484	4	4		1	1	4	6	1.5	1						7	6	0.857143	5	6	1.2		35808	Regulator of microtubule dynamics protein 1 OS=Homo sapiens OX=9606 GN=RMDN1 PE=1 SV=1
196	TRUE	P04843|RPN1_HUMAN	353.09	27	27	136	136	1	159	146	0.918239	103	91	0.883495	78	71	0.910256	141	136	0.964539	139	165	1.18705	Carbamidomethylation	68569.4	Dolichyl-diphosphooligosaccharide--protein glycosyltransferase subunit 1 OS=Homo sapiens OX=9606 GN=RPN1 PE=1 SV=1
1852	TRUE	Q5JTV8|TOIP1_HUMAN	161.848	5	5		1	1	4	4	1	2	1	0.5	8				5	5	6	7	1.16667	Carbamidomethylation	66248.4	Torsin-1A-interacting protein 1 OS=Homo sapiens OX=9606 GN=TOR1AIP1 PE=1 SV=2
2152	TRUE	Q15404|RSU1_HUMAN	142.483	5	5	10	10	1	17	11	0.647059					4	4	13	22	1.69231	18	21	1.16667		31540.3	Ras suppressor protein 1 OS=Homo sapiens OX=9606 GN=RSU1 PE=1 SV=3
2367	TRUE	Q96SU4|OSBL9_HUMAN	125.744	4	4	5	5	1	5	3	0.6	2				2	2	11	8	0.727273	6	7	1.16667	Carbamidomethylation	83184.7	Oxysterol-binding protein-related protein 9 OS=Homo sapiens OX=9606 GN=OSBPL9 PE=1 SV=2
386	TRUE	Q15437|SC23B_HUMAN	307.443	20	17	62	62	1	88	83	0.943182	26	48	1.84615	1	28	28	55	65	1.18182	43	49	1.13953	Carbamidomethylation	86479.2	Protein transport protein Sec23B OS=Homo sapiens OX=9606 GN=SEC23B PE=1 SV=2
459	TRUE	P55884|EIF3B_HUMAN	296.349	21	21	57	57	1	37	62	1.67568	16	12	0.75	8	8	1	63	53	0.84127	31	35	1.12903	Carbamidomethylation	92481.6	Eukaryotic translation initiation factor 3 subunit B OS=Homo sapiens OX=9606 GN=EIF3B PE=1 SV=3
216	TRUE	P20591|MX1_HUMAN	347.476	24	21		1	1	129	147	1.13953	25	18	0.72	154	157	1.01948	63	69	1.09524	140	158	1.12857	Carbamidomethylation	75520.3	Interferon-induced GTP-binding protein Mx1 OS=Homo sapiens OX=9606 GN=MX1 PE=1 SV=4
1964	TRUE	Q9UKM9|RALY_HUMAN	154.855	5	5	6	6	1	17	9	0.529412	9	9	1	8	5	0.625	8	7	0.875	8	9	1.125		32463.2	RNA-binding protein Raly OS=Homo sapiens OX=9606 GN=RALY PE=1 SV=1
1736	TRUE	Q12769|NU160_HUMAN	169.765	6	6	4	4	1	6	21	3.5							19	10	0.526316	8	9	1.125	Carbamidomethylation	162121	Nuclear pore complex protein Nup160 OS=Homo sapiens OX=9606 GN=NUP160 PE=1 SV=3
487	TRUE	P12236|ADT3_HUMAN	293.063	20	7	146	146	1	160	163	1.01875	113	84	0.743363	76	89	1.17105	170	171	1.00588	172	192	1.11628	Carbamidomethylation; Oxidation (M)	32866.3	ADP/ATP translocase 3 OS=Homo sapiens OX=9606 GN=SLC25A6 PE=1 SV=4
2586	TRUE	P17676|CEBPB_HUMAN	111.197	2	2	4	4	1	16	16	1	7	9	1.28571		13	13	6	5	0.833333	9	10	1.11111	Carbamidomethylation	36105.8	CCAAT/enhancer-binding protein beta OS=Homo sapiens OX=9606 GN=CEBPB PE=1 SV=2
1947	TRUE	P23588|IF4B_HUMAN	155.906	6	6	8	8	1	1						1			32	32	1	19	21	1.10526		69151.2	Eukaryotic translation initiation factor 4B OS=Homo sapiens OX=9606 GN=EIF4B PE=1 SV=2
1250	TRUE	Q9UBR2|CATZ_HUMAN	209.121	7	7	14	14	1	40	38	0.95	14	18	1.28571	8	24	3	13	22	1.69231	20	22	1.1	Carbamidomethylation	33867.9	Cathepsin Z OS=Homo sapiens OX=9606 GN=CTSZ PE=1 SV=1
408	TRUE	Q99685|MGLL_HUMAN	304.007	19	19	117	117	1	65	98	1.50769	119	117	0.983193	62	127	2.04839	91	97	1.06593	53	58	1.09434	Oxidation (M); Carbamidomethylation	33261.4	Monoglyceride lipase OS=Homo sapiens OX=9606 GN=MGLL PE=1 SV=2
1800	TRUE	P00492|HPRT_HUMAN	165.143	6	6	18	18	1	19	22	1.15789	16	19	1.1875	13	24	1.84615	16	15	0.9375	12	13	1.08333	Carbamidomethylation	24579.4	Hypoxanthine-guanine phosphoribosyltransferase OS=Homo sapiens OX=9606 GN=HPRT1 PE=1 SV=2
29	FALSE	Q58FG0|HS905_HUMAN	222.836	7	4	91	91	1	87	92	1.05747	91	94	1.03297	95	78	0.821053	88	80	0.909091	73	79	1.08219		38738	Putative heat shock protein HSP 90-alpha A5 OS=Homo sapiens OX=9606 GN=HSP90AA5P PE=2 SV=1
912	TRUE	O14950|ML12B_HUMAN	241.497	9	3	46	46	1	52	63	1.21154	74	48	0.648649	46	41	0.891304	55	58	1.05455	55	59	1.07273	Oxidation (M); Carbamidomethylation	19779.2	Myosin regulatory light chain 12B OS=Homo sapiens OX=9606 GN=MYL12B PE=1 SV=2
912	TRUE	P19105|ML12A_HUMAN	241.497	9	3	46	46	1	52	63	1.21154	74	48	0.648649	46	41	0.891304	55	58	1.05455	55	59	1.07273	Oxidation (M); Carbamidomethylation	19794.1	Myosin regulatory light chain 12A OS=Homo sapiens OX=9606 GN=MYL12A PE=1 SV=2
1878	TRUE	Q53T59|H1BP3_HUMAN	160.539	6	6	3	3	1	1			2			2	3	1.5	15	20	1.33333	17	18	1.05882		42780.3	HCLS1-binding protein 3 OS=Homo sapiens OX=9606 GN=HS1BP3 PE=1 SV=1
1202	TRUE	P27105|STOM_HUMAN	213.986	8	8	21	21	1	25	41	1.64	15	19	1.26667	17	22	1.29412	7	11	1.57143	19	20	1.05263		31730.8	Stomatin OS=Homo sapiens OX=9606 GN=STOM PE=1 SV=3
1160	TRUE	Q96L92|SNX27_HUMAN	218.069	9	9	19	19	1	28	34	1.21429	9	12	1.33333	16	8	0.5	16	18	1.125	21	22	1.04762	Carbamidomethylation	61265.2	Sorting nexin-27 OS=Homo sapiens OX=9606 GN=SNX27 PE=1 SV=2
322	TRUE	P50991|TCPD_HUMAN	322.367	21	19	71	71	1	65	82	1.26154	86	73	0.848837	63	58	0.920635	57	60	1.05263	61	62	1.01639	Carbamidomethylation; Oxidation (M)	57924.2	T-complex protein 1 subunit delta OS=Homo sapiens OX=9606 GN=CCT4 PE=1 SV=4
2121	TRUE	Q8N2F6|ARM10_HUMAN	144.214	4	4		1	1		12	12							1	12	12	8	8	1		37540	Armadillo repeat-containing protein 10 OS=Homo sapiens OX=9606 GN=ARMC10 PE=1 SV=1
2716	TRUE	O60716|CTND1_HUMAN	102.589	4	4	3	3	1	2	8	4							2	10	5	3	3	1		108170	Catenin delta-1 OS=Homo sapiens OX=9606 GN=CTNND1 PE=1 SV=1
2783	TRUE	Q15382|RHEB_HUMAN	98.9357	2	2	7	7	1	6	4	0.666667	7	5	0.714286		3	3		4	4	5	5	1		20497.5	GTP-binding protein Rheb OS=Homo sapiens OX=9606 GN=RHEB PE=1 SV=1
2681	TRUE	Q13496|MTM1_HUMAN	105.348	2	2	1	1	1		6	6								3	3		1	1		69931.7	Myotubularin OS=Homo sapiens OX=9606 GN=MTM1 PE=1 SV=2
2992	TRUE	O96019|ACL6A_HUMAN	85.6315	3	3		1	1	1	4	4								3	3		1	1		47461	Actin-like protein 6A OS=Homo sapiens OX=9606 GN=ACTL6A PE=1 SV=1
2001	TRUE	Q96CN7|ISOC1_HUMAN	151.694	4	4	1	1	1	4	25	6.25	1				1	1	2	4	2	5	5	1		32236.7	Isochorismatase domain-containing protein 1 OS=Homo sapiens OX=9606 GN=ISOC1 PE=1 SV=3
2601	TRUE	Q9BY43|CHM4A_HUMAN	110.573	2	2	3	3	1	7	1	0.142857	6	4	0.666667	12	9	0.75	2	4	2	7	7	1		25098.3	Charged multivesicular body protein 4a OS=Homo sapiens OX=9606 GN=CHMP4A PE=1 SV=3
1575	TRUE	O15269|SPTC1_HUMAN	183.501	5	5	12	12	1	13	16	1.23077	7	7	1	10	7	0.7	7	11	1.57143	8	8	1		52743.9	Serine palmitoyltransferase 1 OS=Homo sapiens OX=9606 GN=SPTLC1 PE=1 SV=1
2557	TRUE	Q9C0E2|XPO4_HUMAN	113.101	5	5	4	4	1	2	4	2							2	3	1.5	1	1	1		130139	Exportin-4 OS=Homo sapiens OX=9606 GN=XPO4 PE=1 SV=2
1667	TRUE	P48556|PSMD8_HUMAN	175.144	6	6	10	10	1	7	12	1.71429	8	6	0.75	2	5	2.5	5	6	1.2	14	14	1		39611.9	26S proteasome non-ATPase regulatory subunit 8 OS=Homo sapiens OX=9606 GN=PSMD8 PE=1 SV=2
1129	TRUE	O75995|SASH3_HUMAN	220.952	7	7	19	19	1	20	19	0.95	9	2	0.222222	5	6	1.2	37	38	1.02703	27	27	1		41595.5	SAM and SH3 domain-containing protein 3 OS=Homo sapiens OX=9606 GN=SASH3 PE=1 SV=2
3037	TRUE	Q8WXI9|P66B_HUMAN	82.7117	4	4		1	1		4	4					2	2		1	1		1	1		65260.7	Transcriptional repressor p66-beta OS=Homo sapiens OX=9606 GN=GATAD2B PE=1 SV=1
2333	TRUE	Q9UK73|FEM1B_HUMAN	128.903	4	4		1	1		10	10					1	1		1	1		1	1		70264.2	Protein fem-1 homolog B OS=Homo sapiens OX=9606 GN=FEM1B PE=1 SV=1
3227	TRUE	Q6Y7W6|GGYF2_HUMAN	69.8904	3	3	2	2	1	1	3	3		1	1				1	1	1		1	1		150070	GRB10-interacting GYF protein 2 OS=Homo sapiens OX=9606 GN=GIGYF2 PE=1 SV=1
2935	TRUE	Q9H992|MARH7_HUMAN	89.4607	3	3		1	1		5	5								1	1		1	1	Carbamidomethylation	78051	E3 ubiquitin-protein ligase MARCHF7 OS=Homo sapiens OX=9606 GN=MARCHF7 PE=1 SV=1
3056	TRUE	Q86YS7|C2CD5_HUMAN	81.6492	2	2		1	1		4	4							2	2	1		1	1	Carbamidomethylation	110447	C2 domain-containing protein 5 OS=Homo sapiens OX=9606 GN=C2CD5 PE=1 SV=1
2755	TRUE	P51828|ADCY7_HUMAN	100.637	3	3		1	1		3	3								1	1		1	1		120308	Adenylate cyclase type 7 OS=Homo sapiens OX=9606 GN=ADCY7 PE=1 SV=1
1696	TRUE	P35268|RL22_HUMAN	172.786	4	4	25	25	1	27	21	0.777778	28	14	0.5	33	22	0.666667	25	16	0.64	27	27	1	Carbamidomethylation	14787	60S ribosomal protein L22 OS=Homo sapiens OX=9606 GN=RPL22 PE=1 SV=2
2334	TRUE	P01906|DQA2_HUMAN	128.828	2	1		2	2	1	1	1	1			8	8	1		3	3	5	6	1.2	Carbamidomethylation	28033	HLA class II histocompatibility antigen, DQ alpha 2 chain OS=Homo sapiens OX=9606 GN=HLA-DQA2 PE=1 SV=2
2775	TRUE	O14745|NHRF1_HUMAN	99.4923	2	2	5	5	1	4	9	2.25		1	1		2	2	8	5	0.625	3	3	1		38868.4	Na(+)/H(+) exchange regulatory cofactor NHE-RF1 OS=Homo sapiens OX=9606 GN=SLC9A3R1 PE=1 SV=4
2482	TRUE	Q9HB07|MYG1_HUMAN	117.507	4	4		1	1	1						1			6	2	0.333333	1	1	1		42477.3	MYG1 exonuclease OS=Homo sapiens OX=9606 GN=MYG1 PE=1 SV=3
2696	TRUE	Q5T9A4|ATD3B_HUMAN	104.031	4	1	4	2	0.5	4	3	0.75		1	1				3	5	1.66667	5	6	1.2		72572.9	ATPase family AAA domain-containing protein 3B OS=Homo sapiens OX=9606 GN=ATAD3B PE=1 SV=1
2032	TRUE	O95865|DDAH2_HUMAN	150.009	4	4	6	6	1	7	9	1.28571	6				13	13	4			3	3	1	Carbamidomethylation	29643.9	N(G),N(G)-dimethylarginine dimethylaminohydrolase 2 OS=Homo sapiens OX=9606 GN=DDAH2 PE=1 SV=1
2156	TRUE	O75044|SRGP2_HUMAN	142.186	5	5		1	1	1	20	20					4	4					1	1		120871	SLIT-ROBO Rho GTPase-activating protein 2 OS=Homo sapiens OX=9606 GN=SRGAP2 PE=1 SV=3
1643	TRUE	P04440|DPB1_HUMAN	177.15	6	6		1	1		12	12				2	7	3.5					1	1	Carbamidomethylation	29159.3	HLA class II histocompatibility antigen, DP beta 1 chain OS=Homo sapiens OX=9606 GN=HLA-DPB1 PE=1 SV=1
1304	FALSE	Q66LE6|2ABD_HUMAN	128.883	3	3	9	9	1	14	13	0.928571					3	3	1				1	1		52042.4	Serine/threonine-protein phosphatase 2A 55 kDa regulatory subunit B delta isoform OS=Homo sapiens OX=9606 GN=PPP2R2D PE=1 SV=1
2811	TRUE	Q8IZH2|XRN1_HUMAN	97.2674	4	4	2	2	1	4	8	2					1	1					1	1	Carbamidomethylation	194107	5'-3' exoribonuclease 1 OS=Homo sapiens OX=9606 GN=XRN1 PE=1 SV=1
1285	FALSE	P61601|NCALD_HUMAN	87.9295	2	2	2	2	1	2	1	0.5	9	3	0.333333	5	3	0.6	1			1	1	1		22245.2	Neurocalcin-delta OS=Homo sapiens OX=9606 GN=NCALD PE=1 SV=2
2668	TRUE	Q5JTZ9|SYAM_HUMAN	106.547	4	4		1	1	1	6	6											1	1		107340	Alanine--tRNA ligase, mitochondrial OS=Homo sapiens OX=9606 GN=AARS2 PE=1 SV=1
3193	TRUE	Q9UNX4|WDR3_HUMAN	72.3177	2	2	1	1	1	1	3	3											1	1		106099	WD repeat-containing protein 3 OS=Homo sapiens OX=9606 GN=WDR3 PE=1 SV=1
3164	TRUE	P51116|FXR2_HUMAN	75.0897	2	2	1	1	1	1	2	2							1				1	1		74223.3	Fragile X mental retardation syndrome-related protein 2 OS=Homo sapiens OX=9606 GN=FXR2 PE=1 SV=2
3383	TRUE	Q93100|KPBB_HUMAN	62.0948	2	2		1	1		1	1											1	1		124884	Phosphorylase b kinase regulatory subunit beta OS=Homo sapiens OX=9606 GN=PHKB PE=1 SV=3
2849	TRUE	Q9NUB1|ACS2L_HUMAN	95.159	3	3		1	1	4	4	1							2				1	1		74856.7	Acetyl-coenzyme A synthetase 2-like, mitochondrial OS=Homo sapiens OX=9606 GN=ACSS1 PE=1 SV=2
1353	TRUE	Q15286|RAB35_HUMAN	201.946	6	4	56	56	1	61	64	1.04918	24	23	0.958333	23	26	1.13043	23	17	0.73913	33	32	0.969697	Oxidation (M)	23025.2	Ras-related protein Rab-35 OS=Homo sapiens OX=9606 GN=RAB35 PE=1 SV=1
1014	TRUE	Q5SSJ5|HP1B3_HUMAN	230.782	9	9	28	28	1	34	36	1.05882	22	15	0.681818	22	17	0.772727	23	20	0.869565	26	25	0.961538		61207	Heterochromatin protein 1-binding protein 3 OS=Homo sapiens OX=9606 GN=HP1BP3 PE=1 SV=1
497	TRUE	P40925|MDHC_HUMAN	292.238	14	14	95	95	1	83	86	1.03614	106	93	0.877358	69	96	1.3913	139	142	1.02158	120	113	0.941667	Oxidation (M); Carbamidomethylation	36426.1	Malate dehydrogenase, cytoplasmic OS=Homo sapiens OX=9606 GN=MDH1 PE=1 SV=4
1591	TRUE	P62081|RS7_HUMAN	182.108	5	5	28	28	1	31	29	0.935484	50	64	1.28	59	55	0.932203	29	23	0.793103	32	30	0.9375		22126.8	40S ribosomal protein S7 OS=Homo sapiens OX=9606 GN=RPS7 PE=1 SV=1
1557	TRUE	P25788|PSA3_HUMAN	185.339	8	8	15	15	1	17	24	1.41176	13	12	0.923077	22	28	1.27273	11	11	1	13	12	0.923077	Carbamidomethylation	28433.2	Proteasome subunit alpha type-3 OS=Homo sapiens OX=9606 GN=PSMA3 PE=1 SV=2
1449	TRUE	A0A0B4J2D5|GAL3B_HUMAN	194.102	8	8	11	11	1	15	27	1.8	20			2	7	3.5	27	22	0.814815	26	24	0.923077	Carbamidomethylation	28142.4	Glutamine amidotransferase-like class 1 domain-containing protein 3B, mitochondrial OS=Homo sapiens OX=9606 GN=GATD3B PE=1 SV=1
1355	TRUE	P16403|H12_HUMAN	201.875	5	1	43	43	1	51	48	0.941176	40	54	1.35	47	36	0.765957	26	24	0.923077	21	25	1.19048		21364.7	Histone H1.2 OS=Homo sapiens OX=9606 GN=H1-2 PE=1 SV=2
1449	TRUE	P0DPI2|GAL3A_HUMAN	194.102	8	8	11	11	1	15	27	1.8	20			2	7	3.5	27	22	0.814815	26	24	0.923077	Carbamidomethylation	28170.4	Glutamine amidotransferase-like class 1 domain-containing protein 3A, mitochondrial OS=Homo sapiens OX=9606 GN=GATD3A PE=1 SV=1
1793	TRUE	O15127|SCAM2_HUMAN	165.496	4	4	15	15	1	18	17	0.944444	4	9	2.25	7	9	1.28571	19	18	0.947368	20	18	0.9		36648.9	Secretory carrier-associated membrane protein 2 OS=Homo sapiens OX=9606 GN=SCAMP2 PE=1 SV=2
2336	TRUE	Q5TDH0|DDI2_HUMAN	128.559	4	4	2	2	1	3	8	2.66667					2	2	10	8	0.8	10	9	0.9		44522.6	Protein DDI1 homolog 2 OS=Homo sapiens OX=9606 GN=DDI2 PE=1 SV=1
1529	TRUE	P16930|FAAA_HUMAN	187.471	7	7	15	15	1	12	14	1.16667	12	20	1.66667		15	15	19	16	0.842105	19	17	0.894737	Carbamidomethylation	46374.3	Fumarylacetoacetase OS=Homo sapiens OX=9606 GN=FAH PE=1 SV=2
1477	TRUE	Q9NRV9|HEBP1_HUMAN	191.871	5	5	32	32	1	42	27	0.642857	38	30	0.789474	48	38	0.791667	37	24	0.648649	28	25	0.892857	Oxidation (M)	21097	Heme-binding protein 1 OS=Homo sapiens OX=9606 GN=HEBP1 PE=1 SV=1
2055	TRUE	Q16512|PKN1_HUMAN	148.402	6	6	11	11	1	12	22	1.83333	2	1	0.5	2	1	0.5	13	14	1.07692	9	8	0.888889		103932	Serine/threonine-protein kinase N1 OS=Homo sapiens OX=9606 GN=PKN1 PE=1 SV=2
293	TRUE	P55786|PSA_HUMAN	326.384	28	28	113	113	1	112	106	0.946429	42	40	0.952381	54	37	0.685185	105	93	0.885714	77	68	0.883117	Carbamidomethylation	103276	Puromycin-sensitive aminopeptidase OS=Homo sapiens OX=9606 GN=NPEPPS PE=1 SV=2
1352	TRUE	O75558|STX11_HUMAN	202.068	7	7	2	2	1	11	13	1.18182		3	3	6	31	5.16667		27	27	24	21	0.875		33195.8	Syntaxin-11 OS=Homo sapiens OX=9606 GN=STX11 PE=1 SV=1
1487	TRUE	Q9NX40|OCAD1_HUMAN	190.633	7	7	21	21	1	16	24	1.5	11	7	0.636364	6	15	2.5	19	22	1.15789	22	19	0.863636	Carbamidomethylation	27626.1	OCIA domain-containing protein 1 OS=Homo sapiens OX=9606 GN=OCIAD1 PE=1 SV=1
2191	FALSE	Q96E39|RMXL1_HUMAN	122.529	2	2	7	7	1	7	9	1.28571	15	21	1.4	20	19	0.95	10	8	0.8	7	6	0.857143		42141.6	RNA binding motif protein, X-linked-like-1 OS=Homo sapiens OX=9606 GN=RBMXL1 PE=1 SV=1
2291	TRUE	P14324|FPPS_HUMAN	132.076	4	4	6	6	1	7	8	1.14286	3	5	1.66667	9	11	1.22222	7	4	0.571429	7	6	0.857143		48275.5	Farnesyl pyrophosphate synthase OS=Homo sapiens OX=9606 GN=FDPS PE=1 SV=4
2548	TRUE	Q15293|RCN1_HUMAN	113.625	2	2		1	1	2	8	4	4			9	1	0.111111		3	3	6	5	0.833333		38890	Reticulocalbin-1 OS=Homo sapiens OX=9606 GN=RCN1 PE=1 SV=1
2381	TRUE	Q96A26|F162A_HUMAN	124.387	2	2	10	10	1	9	5	0.555556	5	6	1.2	11	5	0.454545	8	9	1.125	6	5	0.833333		17342.3	Protein FAM162A OS=Homo sapiens OX=9606 GN=FAM162A PE=1 SV=2
2004	TRUE	Q92522|H1X_HUMAN	151.494	3	3	15	15	1	17	16	0.941176	20	10	0.5	27	28	1.03704	8	3	0.375	18	15	0.833333		22487.1	Histone H1.10 OS=Homo sapiens OX=9606 GN=H1-10 PE=1 SV=1
1747	TRUE	P51571|SSRD_HUMAN	168.756	4	4	21	21	1	18	24	1.33333	10	15	1.5	15	11	0.733333	13	18	1.38462	23	19	0.826087		18998.6	Translocon-associated protein subunit delta OS=Homo sapiens OX=9606 GN=SSR4 PE=1 SV=1
2067	TRUE	O43615|TIM44_HUMAN	147.336	5	5	5	5	1	11	6	0.545455	2	1	0.5	1	2	2	12	12	1	16	13	0.8125		51355.7	Mitochondrial import inner membrane translocase subunit TIM44 OS=Homo sapiens OX=9606 GN=TIMM44 PE=1 SV=2
621	TRUE	Q13740|CD166_HUMAN	274.484	16	16	57	57	1	52	57	1.09615	47	49	1.04255	38	29	0.763158	39	40	1.02564	58	47	0.810345	Carbamidomethylation; Oxidation (M)	65102.3	CD166 antigen OS=Homo sapiens OX=9606 GN=ALCAM PE=1 SV=2
2190	TRUE	Q9Y336|SIGL9_HUMAN	139.857	3	3		1	1	1	4	4		1	1		16	16	3	7	2.33333	5	4	0.8	Carbamidomethylation	50081.6	Sialic acid-binding Ig-like lectin 9 OS=Homo sapiens OX=9606 GN=SIGLEC9 PE=1 SV=2
1845	TRUE	Q13547|HDAC1_HUMAN	162.144	6	3	5	5	1	9	10	1.11111	13	4	0.307692	6	6	1	8	6	0.75	5	4	0.8		55103	Histone deacetylase 1 OS=Homo sapiens OX=9606 GN=HDAC1 PE=1 SV=1
1737	TRUE	P48681|NEST_HUMAN	169.715	12	12		1	1										26	13	0.5	5	4	0.8		177439	Nestin OS=Homo sapiens OX=9606 GN=NES PE=1 SV=2
672	TRUE	P32456|GBP2_HUMAN	266.33	11	6	25	25	1	86	80	0.930233	13	21	1.61538	89	96	1.07865	7	12	1.71429	47	37	0.787234	Oxidation (M); Carbamidomethylation	67209	Guanylate-binding protein 2 OS=Homo sapiens OX=9606 GN=GBP2 PE=1 SV=3
1384	TRUE	P62829|RL23_HUMAN	198.952	4	4	32	32	1	19	15	0.789474	62	22	0.354839	33	23	0.69697	10	10	1	9	7	0.777778	Carbamidomethylation; Oxidation (M)	14865.4	60S ribosomal protein L23 OS=Homo sapiens OX=9606 GN=RPL23 PE=1 SV=1
328	TRUE	Q86UP2|KTN1_HUMAN	320.974	27	27	94	94	1	102	82	0.803922	9	1	0.111111	18	2	0.111111	69	68	0.985507	84	65	0.77381		156275	Kinectin OS=Homo sapiens OX=9606 GN=KTN1 PE=1 SV=1
1206	TRUE	P07910|HNRPC_HUMAN	213.168	9	9	30	30	1	28	33	1.17857	51	25	0.490196	44	35	0.795455	32	29	0.90625	38	29	0.763158	Oxidation (M)	33670	Heterogeneous nuclear ribonucleoproteins C1/C2 OS=Homo sapiens OX=9606 GN=HNRNPC PE=1 SV=4
1350	TRUE	P08574|CY1_HUMAN	202.44	6	6	12	12	1	21	27	1.28571	17	14	0.823529	5	16	3.2	10	16	1.6	21	16	0.761905	Carbamidomethylation	35422	Cytochrome c1, heme protein, mitochondrial OS=Homo sapiens OX=9606 GN=CYC1 PE=1 SV=3
904	TRUE	Q92696|PGTA_HUMAN	242.774	16	16	29	29	1	34	36	1.05882	26	17	0.653846	4	17	4.25	36	26	0.722222	29	22	0.758621	Carbamidomethylation	65071.8	Geranylgeranyl transferase type-2 subunit alpha OS=Homo sapiens OX=9606 GN=RABGGTA PE=1 SV=2
2147	TRUE	Q9BZV1|UBXN6_HUMAN	142.751	4	4	1	1	1	2	1	0.5							5	6	1.2	4	3	0.75	Carbamidomethylation	49753.7	UBX domain-containing protein 6 OS=Homo sapiens OX=9606 GN=UBXN6 PE=1 SV=1
1049	TRUE	O15117|FYB1_HUMAN	228.249	11	11	23	23	1	41	30	0.731707	3	1	0.333333	25	7	0.28	17	8	0.470588	34	25	0.735294		85387.1	FYN-binding protein 1 OS=Homo sapiens OX=9606 GN=FYB1 PE=1 SV=2
734	TRUE	Q99805|TM9S2_HUMAN	258.672	12	12	45	45	1	38	33	0.868421	43	75	1.74419	8	79	9.875	26	43	1.65385	45	33	0.733333	Carbamidomethylation; Oxidation (M)	75775.7	Transmembrane 9 superfamily member 2 OS=Homo sapiens OX=9606 GN=TM9SF2 PE=1 SV=1
990	TRUE	P07741|APT_HUMAN	233.783	9	9	43	43	1	46	40	0.869565	51	61	1.19608	47	43	0.914894	34	27	0.794118	39	28	0.717949	Carbamidomethylation	19607.8	Adenine phosphoribosyltransferase OS=Homo sapiens OX=9606 GN=APRT PE=1 SV=2
2855	TRUE	O43759|SNG1_HUMAN	94.644	2	2		1	1		3	3							6	5	0.833333	7	5	0.714286		25455.6	Synaptogyrin-1 OS=Homo sapiens OX=9606 GN=SYNGR1 PE=1 SV=2
2061	TRUE	O95834|EMAL2_HUMAN	148.155	5	5	6	6	1	6	9	1.5	1	1	1	2	4	2	7	5	0.714286	7	5	0.714286	Carbamidomethylation	70678.8	Echinoderm microtubule-associated protein-like 2 OS=Homo sapiens OX=9606 GN=EML2 PE=1 SV=1
1823	TRUE	Q9NTX5|ECHD1_HUMAN	163.859	6	6	8	8	1	16	14	0.875	1	2	2	12	13	1.08333	16	13	0.8125	17	12	0.705882		33698	Ethylmalonyl-CoA decarboxylase OS=Homo sapiens OX=9606 GN=ECHDC1 PE=1 SV=2
1281	TRUE	O43684|BUB3_HUMAN	206.631	8	8	21	21	1	19	37	1.94737	7	8	1.14286	8	11	1.375	10	11	1.1	19	13	0.684211	Carbamidomethylation	37154.8	Mitotic checkpoint protein BUB3 OS=Homo sapiens OX=9606 GN=BUB3 PE=1 SV=1
848	TRUE	P35998|PRS7_HUMAN	248.738	13	13	65	65	1	78	63	0.807692	52	44	0.846154	32	32	1	34	44	1.29412	45	30	0.666667	Carbamidomethylation	48633.8	26S proteasome regulatory subunit 7 OS=Homo sapiens OX=9606 GN=PSMC2 PE=1 SV=3
2101	TRUE	P62318|SMD3_HUMAN	145.785	3	3	14	14	1	17	7	0.411765	4	6	1.5	6	8	1.33333	8	7	0.875	3	2	0.666667	Carbamidomethylation	13916.2	Small nuclear ribonucleoprotein Sm D3 OS=Homo sapiens OX=9606 GN=SNRPD3 PE=1 SV=1
2615	TRUE	Q96BI1|S22AI_HUMAN	109.955	2	2	6	6	1	4	9	2.25				4	5	1.25	6	5	0.833333	6	4	0.666667		44845.5	Solute carrier family 22 member 18 OS=Homo sapiens OX=9606 GN=SLC22A18 PE=1 SV=3
1799	TRUE	Q92619|HMHA1_HUMAN	165.188	7	7	2	2	1	10	12	1.2	1				1	1	4	3	0.75	3	2	0.666667		124614	Rho GTPase-activating protein 45 OS=Homo sapiens OX=9606 GN=ARHGAP45 PE=1 SV=2
851	FALSE	O60641|AP180_HUMAN	77.66	1	1	3	2	0.666667	5	6	1.2	11	10	0.909091	5	5	1	5	5	1	6	7	1.16667		92502.2	Clathrin coat assembly protein AP180 OS=Homo sapiens OX=9606 GN=SNAP91 PE=1 SV=2
1556	TRUE	Q8IXB1|DJC10_HUMAN	185.358	9	9		1	1	2	5	2.5							7	12	1.71429	14	9	0.642857	Carbamidomethylation	91079.7	DnaJ homolog subfamily C member 10 OS=Homo sapiens OX=9606 GN=DNAJC10 PE=1 SV=2
1442	TRUE	P42768|WASP_HUMAN	194.694	6	6	18	18	1	14	9	0.642857	17	13	0.764706	23	19	0.826087	22	21	0.954545	16	10	0.625		52912.6	Wiskott-Aldrich syndrome protein OS=Homo sapiens OX=9606 GN=WAS PE=1 SV=4
2864	TRUE	Q92890|UFD1_HUMAN	93.73	3	3		1	1	1			2				3	3	7	6	0.857143	8	5	0.625	Carbamidomethylation	34500.3	Ubiquitin recognition factor in ER-associated degradation protein 1 OS=Homo sapiens OX=9606 GN=UFD1 PE=1 SV=3
2214	TRUE	Q9Y3L5|RAP2C_HUMAN	138.368	5	2	8	8	1	13	14	1.07692	2			9	5	0.555556	4	16	4	12	7	0.583333		20744.8	Ras-related protein Rap-2c OS=Homo sapiens OX=9606 GN=RAP2C PE=1 SV=1
1500	FALSE	Q5VZM2|RRAGB_HUMAN	148.456	4	4	28	28	1	25	23	0.92	7	9	1.28571	8	13	1.625	12	11	0.916667	28	16	0.571429	Carbamidomethylation; Oxidation (M)	43250.5	Ras-related GTP-binding protein B OS=Homo sapiens OX=9606 GN=RRAGB PE=1 SV=1
97	FALSE	Q13349|ITAD_HUMAN	124.183	4	3	5	5	1	2	8	4	1	2	2		1	1		3	3	2	1	0.5	Carbamidomethylation	126758	Integrin alpha-D OS=Homo sapiens OX=9606 GN=ITGAD PE=1 SV=2
2222	TRUE	Q9NX46|ADPRS_HUMAN	137.747	4	4	6	6	1	4	4	1	6	8	1.33333	12	12	1	12	13	1.08333	12	6	0.5	Oxidation (M)	38946.7	ADP-ribose glycohydrolase ARH3 OS=Homo sapiens OX=9606 GN=ADPRS PE=1 SV=1
2469	TRUE	O43633|CHM2A_HUMAN	118.517	2	2	2	2	1	5	4	0.8	1	1	1		10	10		1	1	2	1	0.5		25103.9	Charged multivesicular body protein 2a OS=Homo sapiens OX=9606 GN=CHMP2A PE=1 SV=1
2364	TRUE	Q9H0E2|TOLIP_HUMAN	126.015	4	4	3	3	1	5	8	1.6	12	12	1	2			9	5	0.555556	6	3	0.5	Carbamidomethylation	30281.8	Toll-interacting protein OS=Homo sapiens OX=9606 GN=TOLLIP PE=1 SV=1
2802	TRUE	Q9Y2H0|DLGP4_HUMAN	97.6923	4	4	3	3	1	1	2	2	5	1	0.2		1	1	5	2	0.4	2	1	0.5	Carbamidomethylation	108012	Disks large-associated protein 4 OS=Homo sapiens OX=9606 GN=DLGAP4 PE=1 SV=3
2793	TRUE	Q52LJ0|FA98B_HUMAN	98.2149	3	2	1	1	1	1				1	1				1			2	1	0.5	Carbamidomethylation	45547.2	Protein FAM98B OS=Homo sapiens OX=9606 GN=FAM98B PE=1 SV=2
1052	TRUE	Q8IVG5|SAM9L_HUMAN	228.128	17	16		1	1	33	43	1.30303				1						8	4	0.5	Carbamidomethylation	184533	Sterile alpha motif domain-containing protein 9-like OS=Homo sapiens OX=9606 GN=SAMD9L PE=1 SV=2
2727	TRUE	Q8WUA2|PPIL4_HUMAN	102.068	3	3	2	2	1	3	3	1	1									2	1	0.5		57225.1	Peptidyl-prolyl cis-trans isomerase-like 4 OS=Homo sapiens OX=9606 GN=PPIL4 PE=1 SV=1
668	FALSE	Q14410|GLPK2_HUMAN	150.562	4	4		1	1	20	19	0.95	1			6	26	4.33333	8	5	0.625	15	6	0.4	Carbamidomethylation	60593.8	Glycerol kinase 2 OS=Homo sapiens OX=9606 GN=GK2 PE=2 SV=2
2792	TRUE	Q9Y623|MYH4_HUMAN	98.3018	4	2	1	1	1					1	1							3	1	0.333333	Carbamidomethylation	223071	Myosin-4 OS=Homo sapiens OX=9606 GN=MYH4 PE=2 SV=2
2603	TRUE	Q8IXI2|MIRO1_HUMAN	110.524	4	3		1	1										6	6	1	4	1	0.25	Carbamidomethylation	70784.2	Mitochondrial Rho GTPase 1 OS=Homo sapiens OX=9606 GN=RHOT1 PE=1 SV=2
2643	TRUE	P55769|NH2L1_HUMAN	108.25	2	2	9	9	1	5	6	1.2	16	7	0.4375	4	11	2.75	5	2	0.4	4	1	0.25	Carbamidomethylation	14173.5	NHP2-like protein 1 OS=Homo sapiens OX=9606 GN=SNU13 PE=1 SV=3
2928	TRUE	Q04864|REL_HUMAN	89.8398	3	3		1	1	3	2	0.666667							4	4	1	5	1	0.2		68519.6	Proto-oncogene c-Rel OS=Homo sapiens OX=9606 GN=REL PE=1 SV=1
3031	TRUE	P22732|GTR5_HUMAN	83.1026	2	2	5	5	1		5	5								3	3					54974	Solute carrier family 2, facilitated glucose transporter member 5 OS=Homo sapiens OX=9606 GN=SLC2A5 PE=1 SV=1
2986	TRUE	P28072|PSB6_HUMAN	85.9566	3	3	2	2	1	2	3	1.5							1	3	3					25357.7	Proteasome subunit beta type-6 OS=Homo sapiens OX=9606 GN=PSMB6 PE=1 SV=4
3005	TRUE	Q9NTJ3|SMC4_HUMAN	84.6611	3	3	1	1	1											3	3					147182	Structural maintenance of chromosomes protein 4 OS=Homo sapiens OX=9606 GN=SMC4 PE=1 SV=2
2801	TRUE	Q9NRH3|TBG2_HUMAN	97.7459	3	3	2	2	1										1	3	3					51091.8	Tubulin gamma-2 chain OS=Homo sapiens OX=9606 GN=TUBG2 PE=2 SV=1
2801	TRUE	P23258|TBG1_HUMAN	97.7459	3	3	2	2	1										1	3	3					51169.9	Tubulin gamma-1 chain OS=Homo sapiens OX=9606 GN=TUBG1 PE=1 SV=2
2924	TRUE	P28340|DPOD1_HUMAN	90.1145	4	4		1	1		2	2				1	8	8		2	2				Carbamidomethylation	123631	DNA polymerase delta catalytic subunit OS=Homo sapiens OX=9606 GN=POLD1 PE=1 SV=2
2585	TRUE	Q8N6R0|EFNMT_HUMAN	111.392	4	4		1	1	1	5	5		1	1		1	1		2	2				Carbamidomethylation	78767.9	eEF1A lysine and N-terminal methyltransferase OS=Homo sapiens OX=9606 GN=EEF1AKNMT PE=1 SV=1
2913	TRUE	Q9NRG9|AAAS_HUMAN	91.2062	3	3	2	2	1	1	5	5					1	1		2	2					59574.1	Aladin OS=Homo sapiens OX=9606 GN=AAAS PE=1 SV=1
3362	TRUE	Q9NVA1|UQCC1_HUMAN	63.2213	2	2		1	1		2	2		1	1					2	2					34600.2	Ubiquinol-cytochrome-c reductase complex assembly factor 1 OS=Homo sapiens OX=9606 GN=UQCC1 PE=1 SV=3
3169	TRUE	Q9Y2U8|MAN1_HUMAN	74.6229	2	2	4	4	1	1	7	7							1	2	2					99997.5	Inner nuclear membrane protein Man1 OS=Homo sapiens OX=9606 GN=LEMD3 PE=1 SV=2
3330	TRUE	Q9NVU7|SDA1_HUMAN	64.7641	2	2		1	1		1	1								2	2				Carbamidomethylation	79871.3	Protein SDA1 homolog OS=Homo sapiens OX=9606 GN=SDAD1 PE=1 SV=3
2951	TRUE	Q9NXU5|ARL15_HUMAN	87.8499	3	3	1	1	1				1				3	3		1	1	1			Carbamidomethylation	22876.2	ADP-ribosylation factor-like protein 15 OS=Homo sapiens OX=9606 GN=ARL15 PE=1 SV=1
3671	TRUE	Q9Y5H6|PCDA8_HUMAN	47.6442	2	2		1	1					2	2		2	2		1	1					103051	Protocadherin alpha-8 OS=Homo sapiens OX=9606 GN=PCDHA8 PE=2 SV=1
2504	TRUE	Q6UXD7|S49A3_HUMAN	116.391	3	3		1	1		11	11					2	2		1	1				Carbamidomethylation	58427.1	Solute carrier family 49 member A3 OS=Homo sapiens OX=9606 GN=SLC49A3 PE=1 SV=1
92	FALSE	O14556|G3PT_HUMAN	67.8571	2	2	2	2	1	4	5	1.25					1	1		1	1				Carbamidomethylation	44501.2	Glyceraldehyde-3-phosphate dehydrogenase, testis-specific OS=Homo sapiens OX=9606 GN=GAPDHS PE=1 SV=2
2709	TRUE	O75521|ECI2_HUMAN	102.99	2	2	2	2	1	3	3	1					1	1		1	1	1			Carbamidomethylation	43585.1	Enoyl-CoA delta isomerase 2 OS=Homo sapiens OX=9606 GN=ECI2 PE=1 SV=4
2867	TRUE	Q8NEB9|PK3C3_HUMAN	93.6207	3	3	1	1	1	2	7	3.5							1	1	1					101549	Phosphatidylinositol 3-kinase catalytic subunit type 3 OS=Homo sapiens OX=9606 GN=PIK3C3 PE=1 SV=1
3186	TRUE	Q9UJF2|NGAP_HUMAN	73.276	2	2		1	1		2	2								1	1					128558	Ras GTPase-activating protein nGAP OS=Homo sapiens OX=9606 GN=RASAL2 PE=1 SV=2
3640	TRUE	Q86XI2|CNDG2_HUMAN	49.2969	2	2		1	1											1	1					130960	Condensin-2 complex subunit G2 OS=Homo sapiens OX=9606 GN=NCAPG2 PE=1 SV=1
2758	TRUE	O95295|SNAPN_HUMAN	100.593	2	2	1	1	1	4										1	1	3				14874	SNARE-associated protein Snapin OS=Homo sapiens OX=9606 GN=SNAPIN PE=1 SV=1
2460	TRUE	Q9BUQ8|DDX23_HUMAN	119.378	3	3	2	2	1	8	3	0.375	2	4	2		2	2	2	1	0.5					95582.5	Probable ATP-dependent RNA helicase DDX23 OS=Homo sapiens OX=9606 GN=DDX23 PE=1 SV=3
1708	FALSE	Q9NQ29|LUC7L_HUMAN	83.2098	2	2		1	1								1	1	2	1	0.5					43728	Putative RNA-binding protein Luc7-like 1 OS=Homo sapiens OX=9606 GN=LUC7L PE=1 SV=1
2479	TRUE	Q8WZA9|IRGQ_HUMAN	117.838	4	4	5	5	1	5									10	4	0.4	1				62717.3	Immunity-related GTPase family Q protein OS=Homo sapiens OX=9606 GN=IRGQ PE=1 SV=1
2619	TRUE	Q96EU7|C1GLC_HUMAN	109.703	3	3		1	1		7	7		9	9		17	17								36382	C1GALT1-specific chaperone 1 OS=Homo sapiens OX=9606 GN=C1GALT1C1 PE=1 SV=1
2925	TRUE	P49356|FNTB_HUMAN	90.0029	3	3	4	4	1		9	9	2	3	1.5	1	8	8	1							48773.6	Protein farnesyltransferase subunit beta OS=Homo sapiens OX=9606 GN=FNTB PE=1 SV=1
2588	TRUE	Q9NRL3|STRN4_HUMAN	111.141	3	3		1	1		7	7					2	2								80596.1	Striatin-4 OS=Homo sapiens OX=9606 GN=STRN4 PE=1 SV=2
2736	TRUE	Q6PJF5|RHDF2_HUMAN	101.6	4	4		1	1		4	4					2	2							Carbamidomethylation	96686.1	Inactive rhomboid protein 2 OS=Homo sapiens OX=9606 GN=RHBDF2 PE=1 SV=2
2790	TRUE	P63162|RSMN_HUMAN	98.4964	3	3	3	3	1	7	3	0.428571					2	2							Carbamidomethylation	24614	Small nuclear ribonucleoprotein-associated protein N OS=Homo sapiens OX=9606 GN=SNRPN PE=1 SV=1
2790	TRUE	P14678|RSMB_HUMAN	98.4964	3	3	3	3	1	7	3	0.428571					2	2							Carbamidomethylation	24610.1	Small nuclear ribonucleoprotein-associated proteins B and B' OS=Homo sapiens OX=9606 GN=SNRPB PE=1 SV=2
1488	FALSE	Q5T764|IFT1B_HUMAN	68.4106	2	2		1	1							1	1	1								54993.1	Interferon-induced protein with tetratricopeptide repeats 1B OS=Homo sapiens OX=9606 GN=IFIT1B PE=1 SV=1
2760	TRUE	P61960|UFM1_HUMAN	100.505	2	2	6	6	1	2	3	1.5	1	1	1	1			6			6				9117.58	Ubiquitin-fold modifier 1 OS=Homo sapiens OX=9606 GN=UFM1 PE=1 SV=1
3400	TRUE	O43765|SGTA_HUMAN	61.3952	2	2	1	1	1					1	1										Carbamidomethylation	34063.1	Small glutamine-rich tetratricopeptide repeat-containing protein alpha OS=Homo sapiens OX=9606 GN=SGTA PE=1 SV=1
2156	FALSE	P0DJJ0|SRG2C_HUMAN	118.207	3	3		1	1		12	12														53483.7	SLIT-ROBO Rho GTPase-activating protein 2C OS=Homo sapiens OX=9606 GN=SRGAP2C PE=1 SV=1
2156	FALSE	P0DMP2|SRG2B_HUMAN	118.207	3	3		1	1		12	12														53405.7	SLIT-ROBO Rho GTPase-activating protein 2B OS=Homo sapiens OX=9606 GN=SRGAP2B PE=3 SV=1
3058	TRUE	P00813|ADA_HUMAN	81.5518	2	2	1	1	1	1	9	9														40764.4	Adenosine deaminase OS=Homo sapiens OX=9606 GN=ADA PE=1 SV=3
2347	TRUE	Q9Y4A5|TRRAP_HUMAN	127.651	5	5		1	1		7	7													Carbamidomethylation	437600	Transformation/transcription domain-associated protein OS=Homo sapiens OX=9606 GN=TRRAP PE=1 SV=3
3072	TRUE	O95251|KAT7_HUMAN	80.8219	2	2		1	1		7	7														70642.4	Histone acetyltransferase KAT7 OS=Homo sapiens OX=9606 GN=KAT7 PE=1 SV=1
2466	TRUE	Q13247|SRSF6_HUMAN	118.85	3	1	7	2	0.285714	8	7	0.875	1			1	2	2	14	8	0.571429	14	16	1.14286		39586.8	Serine/arginine-rich splicing factor 6 OS=Homo sapiens OX=9606 GN=SRSF6 PE=1 SV=2
2156	FALSE	Q7Z6B7|SRGP1_HUMAN	80.3333	2	2		1	1	1	6	6														124264	SLIT-ROBO Rho GTPase-activating protein 1 OS=Homo sapiens OX=9606 GN=SRGAP1 PE=1 SV=1
2955	TRUE	Q9BRG1|VPS25_HUMAN	87.6181	2	2		1	1		5	5														20747.7	Vacuolar protein-sorting-associated protein 25 OS=Homo sapiens OX=9606 GN=VPS25 PE=1 SV=1
3344	TRUE	Q9NYH9|UTP6_HUMAN	64.1883	2	2		1	1		5	5														70193.9	U3 small nucleolar RNA-associated protein 6 homolog OS=Homo sapiens OX=9606 GN=UTP6 PE=2 SV=2
3155	TRUE	Q8IUD2|RB6I2_HUMAN	75.8163	2	2		1	1		4	4														128086	ELKS/Rab6-interacting/CAST family member 1 OS=Homo sapiens OX=9606 GN=ERC1 PE=1 SV=1
3322	TRUE	O75962|TRIO_HUMAN	65.4257	2	2		1	1		3	3													Carbamidomethylation	346900	Triple functional domain protein OS=Homo sapiens OX=9606 GN=TRIO PE=1 SV=2
3210	TRUE	Q9Y570|PPME1_HUMAN	71.223	2	2	1	1	1		3	3							3							42315.4	Protein phosphatase methylesterase 1 OS=Homo sapiens OX=9606 GN=PPME1 PE=1 SV=3
1951	TRUE	Q8N1I0|DOCK4_HUMAN	155.539	6	6		1	1	4	10	2.5				1										225206	Dedicator of cytokinesis protein 4 OS=Homo sapiens OX=9606 GN=DOCK4 PE=1 SV=3
3288	TRUE	Q8NHU6|TDRD7_HUMAN	67.0071	2	2		1	1		2	2														123586	Tudor domain-containing protein 7 OS=Homo sapiens OX=9606 GN=TDRD7 PE=1 SV=2
3403	TRUE	P29597|TYK2_HUMAN	61.1445	2	2		1	1		2	2														133650	Non-receptor tyrosine-protein kinase TYK2 OS=Homo sapiens OX=9606 GN=TYK2 PE=1 SV=3
3476	TRUE	Q9UBB5|MBD2_HUMAN	57.2311	2	2		1	1		2	2														43254.5	Methyl-CpG-binding domain protein 2 OS=Homo sapiens OX=9606 GN=MBD2 PE=1 SV=1
[truncated: 2,444 more rows]

## Sheet: Table 7
Protein Group	Top	Accession	-10LgP	#Peptides	#Unique	#Spec D5_US_Met	#Spec D5_US_HPG	#Spec D5_S_Met	#Spec D5_S_HPG	#Spec D4_US_Met	#Spec D4_US_HPG	#Spec D4_S_Met	#Spec D4_S_HPG	#Spec D9_US_Met	#Spec D9_US_HPG	#Spec D9_S_Met	#Spec D9_S_HPG	Sum_HPG	Sum_Met	SumRatio	Sum_+Stim_HPG	Sum_+Stim_Met	Sum_+Stim_Ratio	Sum_-Stim_HPG	Sum_-Stim_Met	Sum_-Stim_Ratio	PTM	Average Mass	Description
[truncated: 2,885 more rows]

[truncated: 4 more sheets: Table 8, Table 9, Table 10, Table 11]
