# Supplementary material for: Proteomic characterization of phagocytic primary human monocyte-derived macrophages
Source: Royal Society of Chemistry journal article supplement (doi:10.1039/d2cb00076h), 2022-01-01
Supplement: d2cb00076h2.xlsx [file d2cb00076h2.xlsx]

## Sheet: Table 5 GOBiolProcess
Analysis Type:	PANTHER Overrepresentation Test (Released 20220202)
Annotation Version and Release Date:	GO Ontology database DOI: 10.5281/zenodo.5725227 Released 2020-11-01
Analyzed List:	Client Text Box Input (Homo sapiens)
Reference List:	ProteinsDetectedInBothDatasets.txt (Homo sapiens)
Test Type:	FISHER
Correction:	FDR
GO biological process complete	ProteinsDetectedInBothDatasets.txt - REFLIST (6658)	Client Text Box Input (116)	Client Text Box Input (expected)	Client Text Box Input (over/under)	Client Text Box Input (fold Enrichment)	Client Text Box Input (raw P-value)	Client Text Box Input (FDR)
phagocytosis, recognition (GO:0006910)	24	14	0.42	+	33.48	5.74e-16	2.52e-13
complement activation, classical pathway (GO:0006958)	34	19	0.59	+	32.07	4.41e-21	6.79e-18
humoral immune response mediated by circulating immunoglobulin (GO:0002455)	35	19	0.61	+	31.16	6.72e-21	9.18e-18
complement activation (GO:0006956)	37	19	0.64	+	29.47	1.51e-20	1.86e-17
negative regulation of interleukin-10 production (GO:0032693)	9	4	0.16	+	25.51	5.18e-05	0.00828
peptide antigen assembly with MHC class II protein complex (GO:0002503)	13	5	0.23	+	22.08	9.68e-06	0.00178
MHC class II protein complex assembly (GO:0002399)	13	5	0.23	+	22.08	9.68e-06	0.00175
B cell mediated immunity (GO:0019724)	73	28	1.27	+	22.02	2.88e-27	3.54e-23
immunoglobulin mediated immune response (GO:0016064)	71	27	1.24	+	21.83	3.26e-26	1.34e-22
B cell receptor signaling pathway (GO:0050853)	42	15	0.73	+	20.5	1.54e-14	5.72e-12
phagocytosis, engulfment (GO:0006911)	44	15	0.77	+	19.57	2.7e-14	9.49e-12
positive regulation of B cell activation (GO:0050871)	53	17	0.92	+	18.41	1.05e-15	4.44e-13
plasma membrane invagination (GO:0099024)	49	15	0.85	+	17.57	1.01e-13	3.34e-11
peptide antigen assembly with MHC protein complex (GO:0002501)	17	5	0.3	+	16.88	2.82e-05	0.00469
MHC protein complex assembly (GO:0002396)	17	5	0.3	+	16.88	2.82e-05	0.00462
lymphocyte mediated immunity (GO:0002449)	96	28	1.67	+	16.74	1.54e-24	4.75e-21
adaptive immune response based on somatic recombination of immune receptors built from immunoglobulin superfamily domains (GO:0002460)	101	28	1.76	+	15.91	5.03e-24	1.24e-20
membrane invagination (GO:0010324)	55	15	0.96	+	15.65	4.18e-13	1.32e-10
humoral immune response (GO:0006959)	81	22	1.41	+	15.59	8.68e-19	7.12e-16
superoxide metabolic process (GO:0006801)	20	5	0.35	+	14.35	5.46e-05	0.00861
leukocyte mediated immunity (GO:0002443)	114	28	1.99	+	14.1	8.55e-23	1.5e-19
antigen processing and presentation of peptide antigen via MHC class II (GO:0002495)	25	6	0.44	+	13.78	1.15e-05	0.00205
antigen processing and presentation of exogenous peptide antigen via MHC class II (GO:0019886)	25	6	0.44	+	13.78	1.15e-05	0.00202
cell recognition (GO:0008037)	60	14	1.05	+	13.39	1.62e-11	4.54e-09
production of molecular mediator of immune response (GO:0002440)	39	9	0.68	+	13.25	8.88e-08	2.1e-05
immunoglobulin production (GO:0002377)	39	9	0.68	+	13.25	8.88e-08	2.06e-05
antigen processing and presentation of peptide or polysaccharide antigen via MHC class II (GO:0002504)	26	6	0.45	+	13.25	1.4e-05	0.00235
immunoglobulin production involved in immunoglobulin-mediated immune response (GO:0002381)	23	5	0.4	+	12.48	9.69e-05	0.0147
regulation of interleukin-10 production (GO:0032653)	23	5	0.4	+	12.48	9.69e-05	0.0145
regulation of B cell activation (GO:0050864)	80	17	1.39	+	12.2	3.44e-13	1.11e-10
adaptive immune response (GO:0002250)	165	35	2.87	+	12.18	1.05e-26	6.48e-23
defense response to bacterium (GO:0042742)	98	19	1.71	+	11.13	5.3e-14	1.81e-11
positive regulation of lymphocyte activation (GO:0051251)	145	27	2.53	+	10.69	2.99e-19	2.83e-16
positive regulation of leukocyte activation (GO:0002696)	166	28	2.89	+	9.68	6.09e-19	5.35e-16
antigen receptor-mediated signaling pathway (GO:0050851)	101	17	1.76	+	9.66	9.46e-12	2.77e-09
positive regulation of cell activation (GO:0050867)	172	28	3	+	9.34	1.41e-18	1.08e-15
response to retinoic acid (GO:0032526)	31	5	0.54	+	9.26	0.000333	0.0436
immune effector process (GO:0002252)	183	28	3.19	+	8.78	6.1e-18	4.41e-15
phagocytosis (GO:0006909)	110	16	1.92	+	8.35	2.85e-10	7.31e-08
immune response-activating cell surface receptor signaling pathway (GO:0002429)	124	17	2.16	+	7.87	1.74e-10	4.64e-08
immune response-activating signal transduction (GO:0002757)	124	17	2.16	+	7.87	1.74e-10	4.55e-08
immune response-regulating cell surface receptor signaling pathway (GO:0002768)	139	19	2.42	+	7.85	1.37e-11	3.92e-09
activation of immune response (GO:0002253)	166	22	2.89	+	7.61	4.79e-13	1.47e-10
regulation of lymphocyte activation (GO:0051249)	214	28	3.73	+	7.51	2.43e-16	1.2e-13
regulation of interferon-gamma production (GO:0032649)	46	6	0.8	+	7.49	0.000237	0.0328
cellular response to interferon-gamma (GO:0071346)	56	7	0.98	+	7.17	9.02e-05	0.0139
response to interferon-gamma (GO:0034341)	72	9	1.25	+	7.17	8.61e-06	0.00161
positive regulation of lymphocyte proliferation (GO:0050671)	57	7	0.99	+	7.05	9.99e-05	0.0148
antigen processing and presentation of exogenous peptide antigen (GO:0002478)	49	6	0.85	+	7.03	0.000324	0.0429
positive regulation of leukocyte cell-cell adhesion (GO:1903039)	99	12	1.72	+	6.96	3.4e-07	7.75e-05
positive regulation of T cell activation (GO:0050870)	92	11	1.6	+	6.86	1.22e-06	0.000247
positive regulation of mononuclear cell proliferation (GO:0032946)	59	7	1.03	+	6.81	0.000122	0.0178
positive regulation of immune response (GO:0050778)	257	30	4.48	+	6.7	2.95e-16	1.4e-13
immune response-regulating signaling pathway (GO:0002764)	181	21	3.15	+	6.66	1.76e-11	4.81e-09
response to bacterium (GO:0009617)	237	27	4.13	+	6.54	2.06e-14	7.45e-12
regulation of leukocyte activation (GO:0002694)	258	29	4.5	+	6.45	2.54e-15	1.01e-12
positive regulation of cell-cell adhesion (GO:0022409)	109	12	1.9	+	6.32	8.74e-07	0.000182
positive regulation of leukocyte proliferation (GO:0070665)	65	7	1.13	+	6.18	0.000212	0.0296
regulation of cell activation (GO:0050865)	275	29	4.79	+	6.05	1.18e-14	4.52e-12
innate immune response (GO:0045087)	336	35	5.85	+	5.98	1.46e-17	1e-14
regulation of leukocyte cell-cell adhesion (GO:1903037)	135	13	2.35	+	5.53	1.21e-06	0.000249
positive regulation of immune system process (GO:0002684)	394	37	6.86	+	5.39	3.21e-17	2.08e-14
immune response (GO:0006955)	537	49	9.36	+	5.24	7.93e-23	1.63e-19
defense response to other organism (GO:0098542)	412	37	7.18	+	5.15	1.25e-16	6.7e-14
inflammatory response (GO:0006954)	174	15	3.03	+	4.95	6.45e-07	0.000139
regulation of immune response (GO:0050776)	442	38	7.7	+	4.93	1.65e-16	8.48e-14
defense response (GO:0006952)	543	46	9.46	+	4.86	4.9e-20	5.02e-17
regulation of T cell activation (GO:0050863)	143	12	2.49	+	4.82	1.19e-05	0.00206
regulation of lymphocyte proliferation (GO:0050670)	109	9	1.9	+	4.74	0.000174	0.0252
regulation of mononuclear cell proliferation (GO:0032944)	111	9	1.93	+	4.65	0.000198	0.028
response to other organism (GO:0051707)	561	43	9.77	+	4.4	4.44e-17	2.73e-14
response to external biotic stimulus (GO:0043207)	562	43	9.79	+	4.39	4.72e-17	2.77e-14
regulation of cell-cell adhesion (GO:0022407)	170	13	2.96	+	4.39	1.29e-05	0.0022
regulation of leukocyte proliferation (GO:0070663)	118	9	2.06	+	4.38	0.000303	0.0405
endocytosis (GO:0006897)	249	18	4.34	+	4.15	5.16e-07	0.000115
response to biotic stimulus (GO:0009607)	597	43	10.4	+	4.13	3.85e-16	1.75e-13
regulation of immune system process (GO:0002682)	635	45	11.06	+	4.07	1.04e-16	5.83e-14
positive regulation of cell adhesion (GO:0045785)	187	13	3.26	+	3.99	3.33e-05	0.00539
biological process involved in interspecies interaction between organisms (GO:0044419)	660	44	11.5	+	3.83	2.28e-15	9.34e-13
immune system process (GO:0002376)	879	57	15.31	+	3.72	3.93e-20	4.39e-17
response to external stimulus (GO:0009605)	886	47	15.44	+	3.04	6.74e-13	2.02e-10
regulation of cytokine production (GO:0001817)	321	16	5.59	+	2.86	0.000181	0.0259
positive regulation of response to stimulus (GO:0048584)	830	39	14.46	+	2.7	4.59e-09	1.13e-06
cell surface receptor signaling pathway (GO:0007166)	629	28	10.96	+	2.56	3.73e-06	0.000729
response to stress (GO:0006950)	1452	56	25.3	+	2.21	5.33e-10	1.34e-07
regulation of response to stimulus (GO:0048583)	1548	50	26.97	+	1.85	3.91e-06	0.000752
response to stimulus (GO:0050896)	2741	75	47.76	+	1.57	5.2e-07	0.000114
positive regulation of biological process (GO:0048518)	2390	63	41.64	+	1.51	8.12e-05	0.0126
cellular metabolic process (GO:0044237)	3521	36	61.35	-	0.59	3.19e-06	0.000632
nitrogen compound metabolic process (GO:0006807)	3077	29	53.61	-	0.54	4.75e-06	0.000899
primary metabolic process (GO:0044238)	3316	31	57.77	-	0.54	7.37e-07	0.000156
cellular macromolecule metabolic process (GO:0044260)	2107	19	36.71	-	0.52	0.000258	0.0353
cellular nitrogen compound metabolic process (GO:0034641)	1775	14	30.93	-	0.45	0.000259	0.035
organelle organization (GO:0006996)	1652	6	28.78	-	0.21	4.22e-08	1.02e-05

## Sheet: Table 5 GOCellComp
Analysis Type:	PANTHER Overrepresentation Test (Released 20220202)
Annotation Version and Release Date:	GO Ontology database DOI: 10.5281/zenodo.5725227 Released 2020-11-01
Analyzed List:	Client Text Box Input (Homo sapiens)
Reference List:	ProteinsDetectedInBothDatasets.txt (Homo sapiens)
Test Type:	FISHER
Correction:	FDR
GO cellular component complete	ProteinsDetectedInBothDatasets.txt - REFLIST (6658)	Client Text Box Input (116)	Client Text Box Input (expected)	Client Text Box Input (over/under)	Client Text Box Input (fold Enrichment)	Client Text Box Input (raw P-value)	Client Text Box Input (FDR)
complement component C1q complex (GO:0062167)	3	3	0.05	+	57.4	9.43e-05	0.00846
IgG immunoglobulin complex (GO:0071735)	4	4	0.07	+	57.4	5.42e-06	0.000711
immunoglobulin complex, circulating (GO:0042571)	22	15	0.38	+	39.13	8.65e-18	7.37e-15
immunoglobulin complex (GO:0019814)	29	18	0.51	+	35.63	1.25e-20	2.13e-17
MHC class II protein complex (GO:0042613)	14	6	0.24	+	24.6	7.06e-07	0.0001
NADPH oxidase complex (GO:0043020)	8	3	0.14	+	21.52	0.00073	0.0415
MHC protein complex (GO:0042611)	22	6	0.38	+	15.65	6.14e-06	0.000747
blood microparticle (GO:0072562)	75	17	1.31	+	13.01	1.38e-13	7.82e-11
integral component of lumenal side of endoplasmic reticulum membrane (GO:0071556)	25	5	0.44	+	11.48	0.000137	0.0117
lumenal side of endoplasmic reticulum membrane (GO:0098553)	25	5	0.44	+	11.48	0.000137	0.0111
clathrin-coated endocytic vesicle membrane (GO:0030669)	39	7	0.68	+	10.3	1.11e-05	0.00118
lumenal side of membrane (GO:0098576)	29	5	0.51	+	9.9	0.000253	0.0187
external side of plasma membrane (GO:0009897)	113	19	1.97	+	9.65	5.12e-13	2.18e-10
clathrin-coated endocytic vesicle (GO:0045334)	49	7	0.85	+	8.2	4.17e-05	0.00395
clathrin-coated vesicle membrane (GO:0030665)	65	7	1.13	+	6.18	0.000212	0.0164
cell surface (GO:0009986)	247	25	4.3	+	5.81	2.55e-12	8.68e-10
side of membrane (GO:0098552)	243	24	4.23	+	5.67	1.21e-11	2.95e-09
plasma membrane protein complex (GO:0098797)	179	11	3.12	+	3.53	0.000382	0.0241
integral component of plasma membrane (GO:0005887)	294	14	5.12	+	2.73	0.00073	0.0402
endosome (GO:0005768)	571	22	9.95	+	2.21	0.000406	0.0247
cell periphery (GO:0071944)	1815	62	31.62	+	1.96	5.78e-09	1.23e-06
plasma membrane (GO:0005886)	1702	56	29.65	+	1.89	2.7e-07	4.6e-05
organelle (GO:0043226)	5838	88	101.71	-	0.87	0.000532	0.0313
cytoplasm (GO:0005737)	5482	75	95.51	-	0.79	6.95e-06	0.00079
intracellular membrane-bounded organelle (GO:0043231)	5294	72	92.24	-	0.78	2.29e-05	0.0023
intracellular organelle (GO:0043229)	5594	75	97.46	-	0.77	6.43e-07	9.97e-05
intracellular anatomical structure (GO:0005622)	6168	82	107.46	-	0.76	3.44e-12	9.77e-10
cytosol (GO:0005829)	3072	34	53.52	-	0.64	0.000319	0.0209
intracellular non-membrane-bounded organelle (GO:0043232)	2244	21	39.1	-	0.54	0.000311	0.0221
non-membrane-bounded organelle (GO:0043228)	2244	21	39.1	-	0.54	0.000311	0.0212
nucleus (GO:0005634)	3308	30	57.63	-	0.52	2.69e-07	5.1e-05

## Sheet: Table 5 GOMolecFunc
Analysis Type:	PANTHER Overrepresentation Test (Released 20220202)
Annotation Version and Release Date:	GO Ontology database DOI: 10.5281/zenodo.5725227 Released 2020-11-01
Analyzed List:	Client Text Box Input (Homo sapiens)
Reference List:	ProteinsDetectedInBothDatasets.txt (Homo sapiens)
Test Type:	FISHER
Correction:	FDR
GO molecular function complete	ProteinsDetectedInBothDatasets.txt - REFLIST (6658)	Client Text Box Input (116)	Client Text Box Input (expected)	Client Text Box Input (over/under)	Client Text Box Input (fold Enrichment)	Client Text Box Input (raw P-value)	Client Text Box Input (FDR)
retinoic acid-responsive element binding (GO:0044323)	3	3	0.05	+	57.4	9.43e-05	0.0378
immunoglobulin receptor binding (GO:0034987)	24	14	0.42	+	33.48	5.74e-16	1.04e-12
antigen binding (GO:0003823)	54	20	0.94	+	21.26	2.39e-19	8.63e-16
MHC class II protein complex binding (GO:0023026)	23	6	0.4	+	14.97	7.63e-06	0.0055
MHC protein complex binding (GO:0023023)	27	6	0.47	+	12.75	1.68e-05	0.00866
immune receptor activity (GO:0140375)	36	6	0.63	+	9.57	7.03e-05	0.0317
transmembrane signaling receptor activity (GO:0004888)	114	11	1.99	+	5.54	8.29e-06	0.00498
signaling receptor activity (GO:0038023)	178	15	3.1	+	4.84	8.45e-07	0.00102
molecular transducer activity (GO:0060089)	178	15	3.1	+	4.84	8.45e-07	0.000761

## Sheet: Table 12 GOBiolProcess
Made in Stim Only and Up In Stim GO Biol Process
Analysis Type:	PANTHER Overrepresentation Test (Released 20220202)
Annotation Version and Release Date:	GO Ontology database DOI: 10.5281/zenodo.6399963 Released 2022-03-22
Analyzed List:	Client Text Box Input (Homo sapiens)
Reference List:	AllProteinsIDedInAllMacData.txt (Homo sapiens)
Test Type:	FISHER
Correction:	FDR
GO biological process complete	AllProteinsIDedInAllMacData.txt - REFLIST (7479)	Client Text Box Input (26)	Client Text Box Input (expected)	Client Text Box Input (over/under)	Client Text Box Input (fold Enrichment)	Client Text Box Input (raw P-value)	Client Text Box Input (FDR)	-log10p
immunoglobulin mediated immune response (GO:0016064)	80	6	0.28	+	21.57	3.64e-07	0.000933	6.4389
B cell mediated immunity (GO:0019724)	82	6	0.29	+	21.05	4.17e-07	0.000765	6.37986
adaptive immune response based on somatic recombination of immune receptors built from immunoglobulin superfamily domains (GO:0002460)	115	7	0.4	+	17.51	1.28e-07	0.000824	6.89279
lymphocyte mediated immunity (GO:0002449)	109	6	0.38	+	15.83	2.04e-06	0.00327	5.69037
leukocyte mediated immunity (GO:0002443)	131	6	0.46	+	13.17	5.65e-06	0.00659	5.24795
positive regulation of immune response (GO:0050778)	284	8	0.99	+	8.1	4.04e-06	0.00519	5.39362
regulation of immune response (GO:0050776)	493	11	1.71	+	6.42	3.44e-07	0.0011	6.46344
innate immune response (GO:0045087)	395	8	1.37	+	5.83	4.28e-05	0.0422	4.36856
defense response (GO:0006952)	648	10	2.25	+	4.44	3.64e-05	0.0389	4.4389
