# Supplementary material for: Proteomic characterization of phagocytic primary human monocyte-derived macrophages
Source: Royal Society of Chemistry journal article supplement (doi:10.1039/d2cb00076h), 2022-01-01
Supplement: d2cb00076h3.xlsx [file d2cb00076h3.xlsx]

## Sheet: Table 1
Protein Group	Top	Accession	-10LgP	#Peptides	#Unique	#Spec D6_US_WP	#Spec D6_S_WP	#Spec D5_US_WP	#Spec D5_S_WP	#Spec D4_US_WP	#Spec D4_S_WP	D6_S/US	D5_S/US	D4_S/US	PTM	Average Mass	Description
736	TRUE	P14902|I23O1_HUMAN	301.643	18	18		31	3	140		147	31	46.6667	147	Carbamidomethylation; Oxidation (M)	45326.3	Indoleamine 2,3-dioxygenase 1 OS=Homo sapiens OX=9606 GN=IDO1 PE=1 SV=1
1433	TRUE	Q96PP9|GBP4_HUMAN	247.191	11	10	1	32		60	1	56	32	60	56	Oxidation (M); Carbamidomethylation	73164.7	Guanylate-binding protein 4 OS=Homo sapiens OX=9606 GN=GBP4 PE=2 SV=2
1810	TRUE	O95236|APOL3_HUMAN	224.648	9	9		8		47		46	8	47	46	Oxidation (M)	44278.2	Apolipoprotein L3 OS=Homo sapiens OX=9606 GN=APOL3 PE=1 SV=3
3134	TRUE	P25942|TNR5_HUMAN	158.794	3	3		24		33		33	24	33	33	Carbamidomethylation	30619	Tumor necrosis factor receptor superfamily member 5 OS=Homo sapiens OX=9606 GN=CD40 PE=1 SV=1
2421	TRUE	P28907|CD38_HUMAN	193.988	7	7				5		28		5	28	Carbamidomethylation; Oxidation (M)	34328.4	ADP-ribosyl cyclase/cyclic ADP-ribose hydrolase 1 OS=Homo sapiens OX=9606 GN=CD38 PE=1 SV=2
2909	TRUE	Q8NHV1|GIMA7_HUMAN	170.015	6	6	3	11		7		27	3.66667	7	27	Carbamidomethylation	34508.6	GTPase IMAP family member 7 OS=Homo sapiens OX=9606 GN=GIMAP7 PE=1 SV=1
2520	FALSE	A0M8Q6|IGLC7_HUMAN	129.932	3	1	5	23	3	25		26	4.6	8.33333	26		11253.6	Immunoglobulin lambda constant 7 OS=Homo sapiens OX=9606 GN=IGLC7 PE=1 SV=3
3238	TRUE	O95183|VAMP5_HUMAN	153.339	3	3		11		20		24	11	20	24	Carbamidomethylation; Oxidation (M)	12804.8	Vesicle-associated membrane protein 5 OS=Homo sapiens OX=9606 GN=VAMP5 PE=1 SV=1
1713	TRUE	P01860|IGHG3_HUMAN	230.369	8	2	6	10		14		24	1.66667	14	24	Carbamidomethylation	41287	Immunoglobulin heavy constant gamma 3 OS=Homo sapiens OX=9606 GN=IGHG3 PE=1 SV=2
4003	TRUE	P28845|DHI1_HUMAN	117.692	3	3		2		6		23	2	6	23	Oxidation (M); Carbamidomethylation	32400.9	Corticosteroid 11-beta-dehydrogenase isozyme 1 OS=Homo sapiens OX=9606 GN=HSD11B1 PE=1 SV=3
2156	TRUE	Q9Y617|SERC_HUMAN	207	12	12	42	37	4	5		23	0.880952	1.25	23	Oxidation (M); Carbamidomethylation	40422.7	Phosphoserine aminotransferase OS=Homo sapiens OX=9606 GN=PSAT1 PE=1 SV=2
2520	TRUE	P0DOY3|IGLC3_HUMAN	189.159	5	1	8	35	19	44	2	44	4.375	2.31579	22	Carbamidomethylation	11265.6	Immunoglobulin lambda constant 3 OS=Homo sapiens OX=9606 GN=IGLC3 PE=1 SV=1
2520	TRUE	P0DOY2|IGLC2_HUMAN	189.159	5	1	8	35	19	44	2	44	4.375	2.31579	22	Carbamidomethylation	11293.6	Immunoglobulin lambda constant 2 OS=Homo sapiens OX=9606 GN=IGLC2 PE=1 SV=1
116	TRUE	Q96PP8|GBP5_HUMAN	411.562	32	31	32	207	8	275	16	341	6.46875	34.375	21.3125	Oxidation (M); Carbamidomethylation	66616.9	Guanylate-binding protein 5 OS=Homo sapiens OX=9606 GN=GBP5 PE=1 SV=1
3474	TRUE	Q9H939|PPIP2_HUMAN	141.621	5	5		4		4	1	21	4	4	21	Oxidation (M)	38858.2	Proline-serine-threonine phosphatase-interacting protein 2 OS=Homo sapiens OX=9606 GN=PSTPIP2 PE=1 SV=4
3518	TRUE	O60603|TLR2_HUMAN	139.831	7	7	2	6		6		20	3	6	20	Oxidation (M); Carbamidomethylation	89837.6	Toll-like receptor 2 OS=Homo sapiens OX=9606 GN=TLR2 PE=1 SV=1
3281	TRUE	O14867|BACH1_HUMAN	150.556	5	5	6	3	3	11		20	0.5	3.66667	20	Carbamidomethylation	81957.7	Transcription regulator protein BACH1 OS=Homo sapiens OX=9606 GN=BACH1 PE=1 SV=2
3288	TRUE	O14933|UB2L6_HUMAN	150.364	3	3	12		13	30		20	0.0833333	2.30769	20	Carbamidomethylation	17768.7	Ubiquitin/ISG15-conjugating enzyme E2 L6 OS=Homo sapiens OX=9606 GN=UBE2L6 PE=1 SV=4
3600	TRUE	Q5R3K3|CAHM6_HUMAN	136.184	3	3		5		14		19	5	14	19	Oxidation (M)	34458.2	Calcium homeostasis modulator protein 6 OS=Homo sapiens OX=9606 GN=CALHM6 PE=1 SV=1
2637	TRUE	P0CG04|IGLC1_HUMAN	183.674	5	1	8	24	19	28	2	37	3	1.47368	18.5	Carbamidomethylation	11347.7	Immunoglobulin lambda constant 1 OS=Homo sapiens OX=9606 GN=IGLC1 PE=1 SV=1
2637	TRUE	B9A064|IGLL5_HUMAN	183.674	5	1	8	24	19	28	2	37	3	1.47368	18.5	Carbamidomethylation	23063.2	Immunoglobulin lambda-like polypeptide 5 OS=Homo sapiens OX=9606 GN=IGLL5 PE=2 SV=2
2637	TRUE	P0DOX8|IGL1_HUMAN	183.674	5	1	8	24	19	28	2	37	3	1.47368	18.5	Carbamidomethylation	22830.2	Immunoglobulin lambda-1 light chain OS=Homo sapiens OX=9606 PE=1 SV=1
2520	FALSE	P0CF74|IGLC6_HUMAN	171.355	4	1	8	27	12	30	2	33	3.375	2.5	16.5	Carbamidomethylation	11276.5	Immunoglobulin lambda constant 6 OS=Homo sapiens OX=9606 GN=IGLC6 PE=1 SV=1
2405	TRUE	Q8ND71|GIMA8_HUMAN	194.663	9	9		16		11	2	32	16	11	16	Carbamidomethylation	74890.2	GTPase IMAP family member 8 OS=Homo sapiens OX=9606 GN=GIMAP8 PE=2 SV=2
4281	TRUE	Q14624|ITIH4_HUMAN	105.288	3	3						16			16		103357	Inter-alpha-trypsin inhibitor heavy chain H4 OS=Homo sapiens OX=9606 GN=ITIH4 PE=1 SV=4
2283	TRUE	Q08380|LG3BP_HUMAN	200.396	6	6	1	11	1	14	1	15	11	14	15		65331	Galectin-3-binding protein OS=Homo sapiens OX=9606 GN=LGALS3BP PE=1 SV=1
3389	TRUE	Q9BZZ2|SN_HUMAN	145.591	4	4				6		15		6	15		182624	Sialoadhesin OS=Homo sapiens OX=9606 GN=SIGLEC1 PE=1 SV=2
3814	TRUE	P08243|ASNS_HUMAN	126.202	4	4	7	13	3			15	1.85714	0.333333	15	Carbamidomethylation	64369.9	Asparagine synthetase [glutamine-hydrolyzing] OS=Homo sapiens OX=9606 GN=ASNS PE=1 SV=4
3863	TRUE	P01906|DQA2_HUMAN	123.842	2	1	1	14		14		14	14	14	14	Carbamidomethylation	28033	HLA class II histocompatibility antigen, DQ alpha 2 chain OS=Homo sapiens OX=9606 GN=HLA-DQA2 PE=1 SV=2
3650	TRUE	Q9NUL5|SHFL_HUMAN	133.339	2	2	10	16	8	11		14	1.6	1.375	14	Oxidation (M)	33110.2	Shiftless antiviral inhibitor of ribosomal frameshifting protein OS=Homo sapiens OX=9606 GN=SHFL PE=1 SV=2
2278	TRUE	P01859|IGHG2_HUMAN	200.674	7	1	10	14	2	12	2	27	1.4	6	13.5	Carbamidomethylation	35900.6	Immunoglobulin heavy constant gamma 2 OS=Homo sapiens OX=9606 GN=IGHG2 PE=1 SV=2
640	FALSE	P01861|IGHG4_HUMAN	252.62	8	1	21	37	11	52	5	66	1.7619	4.72727	13.2	Carbamidomethylation	35940.6	Immunoglobulin heavy constant gamma 4 OS=Homo sapiens OX=9606 GN=IGHG4 PE=1 SV=1
4114	TRUE	Q86YS3|RFIP4_HUMAN	113.42	4	4	1		3	14		13	1	4.66667	13		71928.2	Rab11 family-interacting protein 4 OS=Homo sapiens OX=9606 GN=RAB11FIP4 PE=1 SV=1
4986	TRUE	P25105|PTAFR_HUMAN	72.1227	1	1		9				13	9		13		39203.4	Platelet-activating factor receptor OS=Homo sapiens OX=9606 GN=PTAFR PE=1 SV=1
640	TRUE	P0DOX5|IGG1_HUMAN	311.741	16	8	48	87	20	107	12	151	1.8125	5.35	12.5833	Carbamidomethylation	49328.8	Immunoglobulin gamma-1 heavy chain OS=Homo sapiens OX=9606 PE=1 SV=2
640	TRUE	P01857|IGHG1_HUMAN	311.741	16	8	48	87	20	107	12	151	1.8125	5.35	12.5833	Carbamidomethylation	36105.9	Immunoglobulin heavy constant gamma 1 OS=Homo sapiens OX=9606 GN=IGHG1 PE=1 SV=1
1555	TRUE	P01834|IGKC_HUMAN	239.045	6	6	42	76	16	77	13	159	1.80952	4.8125	12.2308	Carbamidomethylation	11765	Immunoglobulin kappa constant OS=Homo sapiens OX=9606 GN=IGKC PE=1 SV=2
1555	FALSE	P0DOX7|IGK_HUMAN	228.542	5	5	42	76	16	74	13	159	1.80952	4.625	12.2308	Carbamidomethylation	23379.1	Immunoglobulin kappa light chain OS=Homo sapiens OX=9606 PE=1 SV=1
4011	TRUE	Q9BQ51|PD1L2_HUMAN	117.333	2	2	1			5		11	1	5	11		30956.9	Programmed cell death 1 ligand 2 OS=Homo sapiens OX=9606 GN=PDCD1LG2 PE=1 SV=2
3253	TRUE	P43897|EFTS_HUMAN	152.33	4	4	12	14	11	13		11	1.16667	1.18182	11	Oxidation (M); Carbamidomethylation	35390.6	Elongation factor Ts, mitochondrial OS=Homo sapiens OX=9606 GN=TSFM PE=1 SV=2
3522	TRUE	O75880|SCO1_HUMAN	139.654	3	3	24	22	10	10		11	0.916667	1	11	Oxidation (M)	33814	Protein SCO1 homolog, mitochondrial OS=Homo sapiens OX=9606 GN=SCO1 PE=1 SV=1
4073	TRUE	Q9BV29|CCD32_HUMAN	115.057	3	3	8	5	7	7		11	0.625	1	11		20655.9	Coiled-coil domain-containing protein 32 OS=Homo sapiens OX=9606 GN=CCDC32 PE=1 SV=2
4189	TRUE	P02652|APOA2_HUMAN	109.373	3	3		4			1	11	4		11	Carbamidomethylation	11175	Apolipoprotein A-II OS=Homo sapiens OX=9606 GN=APOA2 PE=1 SV=1
2986	TRUE	P12314|FCGR1_HUMAN	166.141	4	2	6	15	3	16	2	21	2.5	5.33333	10.5	Carbamidomethylation	42631.8	High affinity immunoglobulin gamma Fc receptor I OS=Homo sapiens OX=9606 GN=FCGR1A PE=1 SV=2
4209	TRUE	Q8N8V2|GBP7_HUMAN	108.423	2	1				6	1	10		6	10	Oxidation (M)	72513.2	Guanylate-binding protein 7 OS=Homo sapiens OX=9606 GN=GBP7 PE=1 SV=2
3224	TRUE	Q96RS6|NUDC1_HUMAN	154.102	4	4		5	1	4		10	5	4	10	Oxidation (M)	66755.8	NudC domain-containing protein 1 OS=Homo sapiens OX=9606 GN=NUDCD1 PE=1 SV=2
3840	TRUE	P04440|DPB1_HUMAN	124.929	3	3		2		3		10	2	3	10	Oxidation (M)	29159.3	HLA class II histocompatibility antigen, DP beta 1 chain OS=Homo sapiens OX=9606 GN=HLA-DPB1 PE=1 SV=1
3594	TRUE	Q96GE9|DMAC1_HUMAN	136.356	3	3	12	15		2		10	1.25	2	10		12257.4	Distal membrane-arm assembly complex protein 1 OS=Homo sapiens OX=9606 GN=DMAC1 PE=1 SV=1
4007	TRUE	Q8IV50|LYSM2_HUMAN	117.483	3	3		5		1		10	5	1	10	Carbamidomethylation	23463.2	LysM and putative peptidoglycan-binding domain-containing protein 2 OS=Homo sapiens OX=9606 GN=LYSMD2 PE=1 SV=1
3397	TRUE	P48065|S6A12_HUMAN	145.298	4	4	2	8			2	20	4		10	Carbamidomethylation	69368.3	Sodium- and chloride-dependent betaine transporter OS=Homo sapiens OX=9606 GN=SLC6A12 PE=1 SV=2
4130	TRUE	P01920|DQB1_HUMAN	112.502	4	4		2				10	2		10	Carbamidomethylation	29991.2	HLA class II histocompatibility antigen, DQ beta 1 chain OS=Homo sapiens OX=9606 GN=HLA-DQB1 PE=1 SV=2
1650	TRUE	Q8IY21|DDX60_HUMAN	233.932	19	17	12	33		22	7	63	2.75	22	9	Oxidation (M); Carbamidomethylation	197853	Probable ATP-dependent RNA helicase DDX60 OS=Homo sapiens OX=9606 GN=DDX60 PE=1 SV=3
3444	TRUE	Q9HB58|SP110_HUMAN	142.769	4	4	1			10	1	9	1	10	9	Carbamidomethylation; Oxidation (M)	78395.5	Sp110 nuclear body protein OS=Homo sapiens OX=9606 GN=SP110 PE=1 SV=5
3627	TRUE	Q92637|FCGRB_HUMAN	134.83	3	1	6	10	3	9	2	18	1.66667	3	9		32231.9	High affinity immunoglobulin gamma Fc receptor IB OS=Homo sapiens OX=9606 GN=FCGR1B PE=2 SV=1
4013	TRUE	Q17R31|TATD3_HUMAN	117.24	2	2	10	6	3	8		9	0.6	2.66667	9		30333	Putative deoxyribonuclease TATDN3 OS=Homo sapiens OX=9606 GN=TATDN3 PE=1 SV=1
4067	TRUE	P56181|NDUV3_HUMAN	115.246	2	2	15	15				9	1		9		11940.5	NADH dehydrogenase [ubiquinone] flavoprotein 3, mitochondrial OS=Homo sapiens OX=9606 GN=NDUFV3 PE=1 SV=2
5171	TRUE	Q8TDH9|BL1S5_HUMAN	65.0866	1	1						9			9		21609.5	Biogenesis of lysosome-related organelles complex 1 subunit 5 OS=Homo sapiens OX=9606 GN=BLOC1S5 PE=1 SV=1
2055	TRUE	Q96F15|GIMA5_HUMAN	212.442	5	5	3	25		15	4	35	8.33333	15	8.75	Carbamidomethylation	34845.9	GTPase IMAP family member 5 OS=Homo sapiens OX=9606 GN=GIMAP5 PE=1 SV=1
306	TRUE	P32455|GBP1_HUMAN	357.803	28	15	77	263	40	273	54	464	3.41558	6.825	8.59259	Oxidation (M); Carbamidomethylation	67930.7	Guanylate-binding protein 1 OS=Homo sapiens OX=9606 GN=GBP1 PE=1 SV=2
2390	TRUE	A6NC98|CC88B_HUMAN	195.058	11	11	18	19	9	7	2	17	1.05556	0.777778	8.5		164809	Coiled-coil domain-containing protein 88B OS=Homo sapiens OX=9606 GN=CCDC88B PE=1 SV=1
3914	TRUE	P02766|TTHY_HUMAN	121.569	2	2				6		8		6	8		15887	Transthyretin OS=Homo sapiens OX=9606 GN=TTR PE=1 SV=1
2696	TRUE	Q96QD8|S38A2_HUMAN	181.127	3	3	32	31	3	8		8	0.96875	2.66667	8		56026	Sodium-coupled neutral amino acid transporter 2 OS=Homo sapiens OX=9606 GN=SLC38A2 PE=1 SV=2
4916	TRUE	Q9NRL2|BAZ1A_HUMAN	75.1883	2	2				2		8		2	8		178702	Bromodomain adjacent to zinc finger domain protein 1A OS=Homo sapiens OX=9606 GN=BAZ1A PE=1 SV=2
2874	TRUE	Q9H1K1|ISCU_HUMAN	171.92	4	4	10	24	10	13		8	2.4	1.3	8	Carbamidomethylation; Oxidation (M)	17999	Iron-sulfur cluster assembly enzyme ISCU, mitochondrial OS=Homo sapiens OX=9606 GN=ISCU PE=1 SV=2
4968	TRUE	P01619|KV320_HUMAN	73.0604	1	1		3				8	3		8		12557.1	Immunoglobulin kappa variable 3-20 OS=Homo sapiens OX=9606 GN=IGKV3-20 PE=1 SV=2
5112	TRUE	O60825|F262_HUMAN	67.3078	1	1		1				8	1		8		58476.8	6-phosphofructo-2-kinase/fructose-2,6-bisphosphatase 2 OS=Homo sapiens OX=9606 GN=PFKFB2 PE=1 SV=2
4262	TRUE	Q6UWF3|SCIMP_HUMAN	106.157	2	2						8			8	Oxidation (M)	16618	SLP adapter and CSK-interacting membrane protein OS=Homo sapiens OX=9606 GN=SCIMP PE=1 SV=1
4358	TRUE	Q9NNX6|CD209_HUMAN	100.73	3	3						8			8		45774.9	CD209 antigen OS=Homo sapiens OX=9606 GN=CD209 PE=1 SV=1
2540	TRUE	P28068|DMB_HUMAN	187.771	5	5	18	19		20	3	23	1.05556	20	7.66667	Carbamidomethylation; Oxidation (M)	28943.1	HLA class II histocompatibility antigen, DM beta chain OS=Homo sapiens OX=9606 GN=HLA-DMB PE=1 SV=1
2271	TRUE	Q53GL7|PAR10_HUMAN	201.317	10	10	2	4	3	26	4	30	2	8.66667	7.5	Oxidation (M)	109998	Protein mono-ADP-ribosyltransferase PARP10 OS=Homo sapiens OX=9606 GN=PARP10 PE=1 SV=2
1877	TRUE	P04233|HG2A_HUMAN	221.22	7	7	31	40	14	62	13	93	1.29032	4.42857	7.15385	Carbamidomethylation; Oxidation (M)	33515.6	HLA class II histocompatibility antigen gamma chain OS=Homo sapiens OX=9606 GN=CD74 PE=1 SV=3
4718	TRUE	Q5VYY1|ANR22_HUMAN	83.7937	1	1		6		7		7	6	7	7		21848.6	Ankyrin repeat domain-containing protein 22 OS=Homo sapiens OX=9606 GN=ANKRD22 PE=2 SV=1
4623	TRUE	P22794|EVI2A_HUMAN	88.179	2	2	1			7		7	1	7	7		26212.7	Protein EVI2A OS=Homo sapiens OX=9606 GN=EVI2A PE=1 SV=2
4881	TRUE	A0A0C4DH25|KVD20_HUMAN	76.8335	1	1		8		5		7	8	5	7		12515.1	Immunoglobulin kappa variable 3D-20 OS=Homo sapiens OX=9606 GN=IGKV3D-20 PE=3 SV=1
4881	TRUE	A0A0A0MRZ8|KVD11_HUMAN	76.8335	1	1		8		5		7	8	5	7		12625.2	Immunoglobulin kappa variable 3D-11 OS=Homo sapiens OX=9606 GN=IGKV3D-11 PE=3 SV=6
4881	TRUE	P04433|KV311_HUMAN	76.8335	1	1		8		5		7	8	5	7		12575.2	Immunoglobulin kappa variable 3-11 OS=Homo sapiens OX=9606 GN=IGKV3-11 PE=1 SV=1
4117	TRUE	Q8TCU6|PREX1_HUMAN	113.277	5	5	1	5	1	2	1	7	5	2	7		186203	Phosphatidylinositol 3,4,5-trisphosphate-dependent Rac exchanger 1 protein OS=Homo sapiens OX=9606 GN=PREX1 PE=1 SV=3
3709	TRUE	Q14142|TRI14_HUMAN	131.004	4	4	1	3		2	2	14	3	2	7	Carbamidomethylation	49773	Tripartite motif-containing protein 14 OS=Homo sapiens OX=9606 GN=TRIM14 PE=1 SV=2
2614	FALSE	Q9NVN3|RIC8B_HUMAN	78.8782	1	1	3	3	2	4	1	7	1	2	7		58824.8	Synembryn-B OS=Homo sapiens OX=9606 GN=RIC8B PE=1 SV=2
4268	TRUE	Q9UBF8|PI4KB_HUMAN	106.02	5	5		1		1	1	7	1	1	7		91378.9	Phosphatidylinositol 4-kinase beta OS=Homo sapiens OX=9606 GN=PI4KB PE=1 SV=1
4400	TRUE	Q14653|IRF3_HUMAN	99.1478	3	3	14	6	2	1		7	0.428571	0.5	7	Carbamidomethylation	47219.3	Interferon regulatory factor 3 OS=Homo sapiens OX=9606 GN=IRF3 PE=1 SV=1
3705	TRUE	Q9H5X1|CIA2A_HUMAN	131.12	3	3	7	7	10			7	1	0.1	7	Carbamidomethylation	18355.1	Cytosolic iron-sulfur assembly component 2A OS=Homo sapiens OX=9606 GN=CIAO2A PE=1 SV=1
4693	TRUE	P02746|C1QB_HUMAN	85.2632	2	2		4				7	4		7		26721.8	Complement C1q subcomponent subunit B OS=Homo sapiens OX=9606 GN=C1QB PE=1 SV=3
3792	TRUE	Q15554|TERF2_HUMAN	127.11	3	3	9	10			1	7	1.11111		7		59593.5	Telomeric repeat-binding factor 2 OS=Homo sapiens OX=9606 GN=TERF2 PE=1 SV=3
5908	TRUE	Q9NQ35|NRIP3_HUMAN	31.6747	1	1						7			7	Oxidation (M)	26975.2	Nuclear receptor-interacting protein 3 OS=Homo sapiens OX=9606 GN=NRIP3 PE=1 SV=1
2356	TRUE	P30511|HLAF_HUMAN	196.934	8	6	15	18	9	15	2	13	1.2	1.66667	6.5	Carbamidomethylation	39061.7	HLA class I histocompatibility antigen, alpha chain F OS=Homo sapiens OX=9606 GN=HLA-F PE=1 SV=3
4506	TRUE	P06681|CO2_HUMAN	93.6293	3	3		6		6	1	6	6	6	6		83267.8	Complement C2 OS=Homo sapiens OX=9606 GN=C2 PE=1 SV=2
4733	TRUE	Q9Y4Y9|LSM5_HUMAN	83.5513	2	2			1	6		6		6	6	Oxidation (M)	9937.48	U6 snRNA-associated Sm-like protein LSm5 OS=Homo sapiens OX=9606 GN=LSM5 PE=1 SV=3
3933	TRUE	Q9UKD2|MRT4_HUMAN	120.619	3	3	6	8	5	14		6	1.33333	2.8	6	Oxidation (M)	27560.5	mRNA turnover protein 4 homolog OS=Homo sapiens OX=9606 GN=MRTO4 PE=1 SV=2
2819	TRUE	Q8IWW6|RHG12_HUMAN	174.775	7	7	5	7	7	18	1	6	1.4	2.57143	6	Carbamidomethylation	96254.4	Rho GTPase-activating protein 12 OS=Homo sapiens OX=9606 GN=ARHGAP12 PE=1 SV=1
5048	TRUE	Q96GW9|SYMM_HUMAN	69.8647	3	3	3	4		1		6	1.33333	1	6	Carbamidomethylation	66590.9	Methionine--tRNA ligase, mitochondrial OS=Homo sapiens OX=9606 GN=MARS2 PE=1 SV=2
5232	TRUE	Q9BZF9|UACA_HUMAN	62.3352	1	1	3	3		1	1	6	1	1	6		162505	Uveal autoantigen with coiled-coil domains and ankyrin repeats OS=Homo sapiens OX=9606 GN=UACA PE=1 SV=2
4324	TRUE	Q7Z7L1|SLN11_HUMAN	102.201	2	2	3		1		1	6	0.333333	1	6		102836	Schlafen family member 11 OS=Homo sapiens OX=9606 GN=SLFN11 PE=1 SV=2
4364	TRUE	Q6P1X6|CH082_HUMAN	100.336	4	4				1		6		1	6	Carbamidomethylation; Oxidation (M)	23889.4	UPF0598 protein C8orf82 OS=Homo sapiens OX=9606 GN=C8orf82 PE=1 SV=2
5061	TRUE	Q8N584|TT39C_HUMAN	69.335	2	2		3			1	6	3		6	Carbamidomethylation	65869.7	Tetratricopeptide repeat protein 39C OS=Homo sapiens OX=9606 GN=TTC39C PE=2 SV=2
4348	TRUE	Q8N5F7|NKAP_HUMAN	101.216	2	2	3	4				6	1.33333		6		47138.3	NF-kappa-B-activating protein OS=Homo sapiens OX=9606 GN=NKAP PE=1 SV=1
4933	TRUE	Q8WUY1|THEM6_HUMAN	74.5599	1	1	5	5				6	1		6		23865	Protein THEM6 OS=Homo sapiens OX=9606 GN=THEM6 PE=1 SV=2
2995	TRUE	P63313|TYB10_HUMAN	165.451	6	6	16	12			2	12	0.75		6	Oxidation (M)	5025.67	Thymosin beta-10 OS=Homo sapiens OX=9606 GN=TMSB10 PE=1 SV=2
4879	TRUE	P62699|YPEL5_HUMAN	76.8924	2	2	2					6	0.5		6		13841.6	Protein yippee-like 5 OS=Homo sapiens OX=9606 GN=YPEL5 PE=1 SV=1
4823	TRUE	P01909|DQA1_HUMAN	79.4434	1	1						6			6		27804.9	HLA class II histocompatibility antigen, DQ alpha 1 chain OS=Homo sapiens OX=9606 GN=HLA-DQA1 PE=1 SV=1
4943	TRUE	Q9H6H4|REEP4_HUMAN	74.1438	1	1			1	4		5		4	5		29395.1	Receptor expression-enhancing protein 4 OS=Homo sapiens OX=9606 GN=REEP4 PE=1 SV=1
3815	TRUE	P46527|CDN1B_HUMAN	126.121	3	3	1	5		3		5	5	3	5	Carbamidomethylation	22073.3	Cyclin-dependent kinase inhibitor 1B OS=Homo sapiens OX=9606 GN=CDKN1B PE=1 SV=1
4810	TRUE	Q8NI37|PPTC7_HUMAN	79.9719	2	2				3		5		3	5	Carbamidomethylation	32645.7	Protein phosphatase PTC7 homolog OS=Homo sapiens OX=9606 GN=PPTC7 PE=1 SV=1
3055	TRUE	Q9GZY8|MFF_HUMAN	162.221	7	7	6	7	8	15		5	1.16667	1.875	5		38464.5	Mitochondrial fission factor OS=Homo sapiens OX=9606 GN=MFF PE=1 SV=1
4200	TRUE	Q9HCE5|MET14_HUMAN	109.037	2	2	4	6	4	3	1	5	1.5	0.75	5		52150.4	N6-adenosine-methyltransferase non-catalytic subunit OS=Homo sapiens OX=9606 GN=METTL14 PE=1 SV=2
4768	TRUE	Q9HAF1|EAF6_HUMAN	81.8901	1	1	5	8	8	3		5	1.6	0.375	5		21634.9	Chromatin modification-related protein MEAF6 OS=Homo sapiens OX=9606 GN=MEAF6 PE=1 SV=1
4740	TRUE	Q9Y3D8|KAD6_HUMAN	83.0431	1	1	3	6	4	1		5	2	0.25	5	Oxidation (M)	20061.5	Adenylate kinase isoenzyme 6 OS=Homo sapiens OX=9606 GN=AK6 PE=1 SV=1
4764	TRUE	P26010|ITB7_HUMAN	82.0927	1	1		2				5	2		5		86903.2	Integrin beta-7 OS=Homo sapiens OX=9606 GN=ITGB7 PE=1 SV=1
5761	TRUE	Q9Y2P4|S27A6_HUMAN	38.7616	1	1		1				5	1		5	Oxidation (M)	70111.6	Long-chain fatty acid transport protein 6 OS=Homo sapiens OX=9606 GN=SLC27A6 PE=1 SV=1
5099	TRUE	O75817|POP7_HUMAN	67.7706	1	1	6	5				5	0.833333		5		15650.9	Ribonuclease P protein subunit p20 OS=Homo sapiens OX=9606 GN=POP7 PE=1 SV=2
5025	TRUE	P0C0L4|CO4A_HUMAN	70.9018	2	2					1	5			5		192785	Complement C4-A OS=Homo sapiens OX=9606 GN=C4A PE=1 SV=2
5025	TRUE	P0C0L5|CO4B_HUMAN	70.9018	2	2					1	5			5		192751	Complement C4-B OS=Homo sapiens OX=9606 GN=C4B PE=1 SV=2
5178	TRUE	O75676|KS6A4_HUMAN	64.7947	1	1					1	5			5		85605.8	Ribosomal protein S6 kinase alpha-4 OS=Homo sapiens OX=9606 GN=RPS6KA4 PE=1 SV=1
3656	TRUE	Q8NHG8|ZNRF2_HUMAN	133.233	5	5					3	15			5	Carbamidomethylation	24114.7	E3 ubiquitin-protein ligase ZNRF2 OS=Homo sapiens OX=9606 GN=ZNRF2 PE=1 SV=1
994	FALSE	A8MVU1|NCF1C_HUMAN	273.472	14	14	18	68	22	107	20	98	3.77778	4.86364	4.9	Carbamidomethylation; Oxidation (M)	41850.5	Putative neutrophil cytosol factor 1C OS=Homo sapiens OX=9606 GN=NCF1C PE=5 SV=1
994	TRUE	P14598|NCF1_HUMAN	277.901	15	15	19	71	22	107	20	98	3.73684	4.86364	4.9	Carbamidomethylation; Oxidation (M)	44681.8	Neutrophil cytosol factor 1 OS=Homo sapiens OX=9606 GN=NCF1 PE=1 SV=4
816	TRUE	Q8IVG5|SAM9L_HUMAN	292.519	18	17	11	42	1	70	11	52	3.81818	70	4.72727	Oxidation (M); Carbamidomethylation	184533	Sterile alpha motif domain-containing protein 9-like OS=Homo sapiens OX=9606 GN=SAMD9L PE=1 SV=2
83	TRUE	P42224|STAT1_HUMAN	433.856	44	44	195	748	190	764	252	1174	3.8359	4.02105	4.65873	Oxidation (M); Carbamidomethylation	87334.8	Signal transducer and activator of transcription 1-alpha/beta OS=Homo sapiens OX=9606 GN=STAT1 PE=1 SV=2
994	FALSE	A6NI72|NCF1B_HUMAN	271.878	14	14	17	67	21	91	18	83	3.94118	4.33333	4.61111	Carbamidomethylation; Oxidation (M)	44817	Putative neutrophil cytosol factor 1B OS=Homo sapiens OX=9606 GN=NCF1B PE=5 SV=2
2378	TRUE	P28067|DMA_HUMAN	195.601	4	4	5	34	7	60	12	54	6.8	8.57143	4.5	Carbamidomethylation; Oxidation (M)	29194.4	HLA class II histocompatibility antigen, DM alpha chain OS=Homo sapiens OX=9606 GN=HLA-DMA PE=1 SV=1
3154	TRUE	Q9P0J1|PDP1_HUMAN	157.789	6	6	5	13		5	2	9	2.6	5	4.5		61054.1	[Pyruvate dehydrogenase [acetyl-transferring]]-phosphatase 1, mitochondrial OS=Homo sapiens OX=9606 GN=PDP1 PE=1 SV=3
3174	TRUE	P02647|APOA1_HUMAN	156.807	7	7	10	17	3	13	2	9	1.7	4.33333	4.5		30777.8	Apolipoprotein A-I OS=Homo sapiens OX=9606 GN=APOA1 PE=1 SV=1
4085	TRUE	O14841|OPLA_HUMAN	114.507	3	3		3	5	5	2	9	3	1	4.5		137457	5-oxoprolinase OS=Homo sapiens OX=9606 GN=OPLAH PE=1 SV=3
1581	TRUE	Q03169|TNAP2_HUMAN	237.565	14	14	15	21	6	19	7	31	1.4	3.16667	4.42857	Carbamidomethylation	72661.3	Tumor necrosis factor alpha-induced protein 2 OS=Homo sapiens OX=9606 GN=TNFAIP2 PE=1 SV=2
1949	TRUE	Q9NZQ7|PD1L1_HUMAN	217.837	6	6	15	20	3	23	10	43	1.33333	7.66667	4.3	Carbamidomethylation; Oxidation (M)	33275.3	Programmed cell death 1 ligand 1 OS=Homo sapiens OX=9606 GN=CD274 PE=1 SV=1
4083	TRUE	P49796|RGS3_HUMAN	114.611	2	2		1		6	1	4	1	6	4		132336	Regulator of G-protein signaling 3 OS=Homo sapiens OX=9606 GN=RGS3 PE=1 SV=2
4538	TRUE	P13612|ITA4_HUMAN	92.0397	3	3	1	1	1	4		4	1	4	4		114900	Integrin alpha-4 OS=Homo sapiens OX=9606 GN=ITGA4 PE=1 SV=3
4023	TRUE	O43395|PRPF3_HUMAN	116.835	4	4	9	12	5	12	1	4	1.33333	2.4	4	Carbamidomethylation	77528.9	U4/U6 small nuclear ribonucleoprotein Prp3 OS=Homo sapiens OX=9606 GN=PRPF3 PE=1 SV=2
4431	TRUE	Q9BZE9|ASPC1_HUMAN	97.7746	3	3	1	5	1	2	2	8	5	2	4		60183.1	Tether containing UBX domain for GLUT4 OS=Homo sapiens OX=9606 GN=ASPSCR1 PE=1 SV=1
2968	TRUE	Q7L1T6|NB5R4_HUMAN	166.702	5	5	2	8	1	2	2	8	4	2	4		59473.7	Cytochrome b5 reductase 4 OS=Homo sapiens OX=9606 GN=CYB5R4 PE=1 SV=1
2724	TRUE	Q99572|P2RX7_HUMAN	179.733	8	8	9	18	4	8		4	2	2	4	Carbamidomethylation	68584.9	P2X purinoceptor 7 OS=Homo sapiens OX=9606 GN=P2RX7 PE=1 SV=4
4204	TRUE	P78314|3BP2_HUMAN	108.738	3	3	1	3	1			4	3	1	4	Carbamidomethylation	62243.6	SH3 domain-binding protein 2 OS=Homo sapiens OX=9606 GN=SH3BP2 PE=1 SV=2
3587	TRUE	Q8IU85|KCC1D_HUMAN	136.653	3	1	11	13	6	6	3	12	1.18182	1	4	Oxidation (M)	42913.8	Calcium/calmodulin-dependent protein kinase type 1D OS=Homo sapiens OX=9606 GN=CAMK1D PE=1 SV=1
4991	TRUE	P10914|IRF1_HUMAN	72.0148	1	1				1		4		1	4		36502.2	Interferon regulatory factor 1 OS=Homo sapiens OX=9606 GN=IRF1 PE=1 SV=2
2661	TRUE	Q9BZE1|RM37_HUMAN	182.403	5	5	19	22	15	14		4	1.15789	0.933333	4	Carbamidomethylation	48117.5	39S ribosomal protein L37, mitochondrial OS=Homo sapiens OX=9606 GN=MRPL37 PE=1 SV=2
4426	TRUE	Q8N386|LRC25_HUMAN	97.9517	2	2			10			4		0.1	4		33178.5	Leucine-rich repeat-containing protein 25 OS=Homo sapiens OX=9606 GN=LRRC25 PE=1 SV=2
4599	TRUE	Q8TEH3|DEN1A_HUMAN	89.2541	2	2		4				4	4		4	Carbamidomethylation	110577	DENN domain-containing protein 1A OS=Homo sapiens OX=9606 GN=DENND1A PE=1 SV=2
4393	TRUE	Q9Y228|T3JAM_HUMAN	99.4575	2	2		1				4	1		4		63626.3	TRAF3-interacting JNK-activating modulator OS=Homo sapiens OX=9606 GN=TRAF3IP3 PE=1 SV=2
4430	TRUE	P07738|PMGE_HUMAN	97.8045	2	2	1	1				4	1		4	Carbamidomethylation	30005.2	Bisphosphoglycerate mutase OS=Homo sapiens OX=9606 GN=BPGM PE=1 SV=2
3721	TRUE	Q6P3S1|DEN1B_HUMAN	130.462	4	4	3	3				4	1		4	Carbamidomethylation	86551.6	DENN domain-containing protein 1B OS=Homo sapiens OX=9606 GN=DENND1B PE=1 SV=2
4500	TRUE	Q86YV0|RASL3_HUMAN	93.7505	2	2		1			1	4	1		4		111898	RAS protein activator like-3 OS=Homo sapiens OX=9606 GN=RASAL3 PE=1 SV=2
5066	TRUE	Q7RTN6|STRAA_HUMAN	69.1268	1	1	9	8				4	0.888889		4		48369	STE20-related kinase adapter protein alpha OS=Homo sapiens OX=9606 GN=STRADA PE=1 SV=1
4953	TRUE	O14730|RIOK3_HUMAN	73.7827	2	2	2	1				4	0.5		4	Oxidation (M)	59093	Serine/threonine-protein kinase RIO3 OS=Homo sapiens OX=9606 GN=RIOK3 PE=1 SV=2
4295	TRUE	Q99611|SPS2_HUMAN	104.614	2	2						4			4		47273.9	Selenide, water dikinase 2 OS=Homo sapiens OX=9606 GN=SEPHS2 PE=1 SV=3
5039	TRUE	Q99638|RAD9A_HUMAN	70.3876	2	2						4			4		42547.4	Cell cycle checkpoint control protein RAD9A OS=Homo sapiens OX=9606 GN=RAD9A PE=1 SV=1
5079	TRUE	Q8N9F7|GDPD1_HUMAN	68.6112	2	2						4			4		36167.1	Lysophospholipase D GDPD1 OS=Homo sapiens OX=9606 GN=GDPD1 PE=1 SV=2
5572	TRUE	Q9NWZ5|UCKL1_HUMAN	48.0164	1	1					1	4			4		61141	Uridine-cytidine kinase-like 1 OS=Homo sapiens OX=9606 GN=UCKL1 PE=1 SV=2
4979	TRUE	Q12899|TRI26_HUMAN	72.4363	2	2					2	8			4		62165.9	Tripartite motif-containing protein 26 OS=Homo sapiens OX=9606 GN=TRIM26 PE=1 SV=1
25	TRUE	P23381|SYWC_HUMAN	517.428	55	55	772	1489	599	1796	526	2091	1.92876	2.99833	3.97529	Carbamidomethylation; Oxidation (M)	53165.4	Tryptophan--tRNA ligase, cytoplasmic OS=Homo sapiens OX=9606 GN=WARS1 PE=1 SV=2
3832	TRUE	Q9HCE6|ARGAL_HUMAN	125.407	4	4		3	8	7	6	22	3	0.875	3.66667		140379	Rho guanine nucleotide exchange factor 10-like protein OS=Homo sapiens OX=9606 GN=ARHGEF10L PE=1 SV=4
3637	TRUE	P36915|GNL1_HUMAN	133.981	4	4	14	10	5	4	3	11	0.714286	0.8	3.66667	Carbamidomethylation	68660.9	Guanine nucleotide-binding protein-like 1 OS=Homo sapiens OX=9606 GN=GNL1 PE=1 SV=2
627	TRUE	P40763|STAT3_HUMAN	313.196	20	20	33	56	38	120	55	195	1.69697	3.15789	3.54545	Carbamidomethylation; Oxidation (M)	88067.8	Signal transducer and activator of transcription 3 OS=Homo sapiens OX=9606 GN=STAT3 PE=1 SV=2
1557	TRUE	P57764|GSDMD_HUMAN	238.935	9	9	26	29	19	47	13	46	1.11538	2.47368	3.53846	Carbamidomethylation; Oxidation (M)	52801	Gasdermin-D OS=Homo sapiens OX=9606 GN=GSDMD PE=1 SV=1
4299	TRUE	O15554|KCNN4_HUMAN	104.199	2	2	7	10	1	6	2	7	1.42857	6	3.5		47695.5	Intermediate conductance calcium-activated potassium channel protein 4 OS=Homo sapiens OX=9606 GN=KCNN4 PE=1 SV=1
4931	TRUE	Q9NPD3|EXOS4_HUMAN	74.6149	1	1	1			2	2	7	1	2	3.5		26383	Exosome complex component RRP41 OS=Homo sapiens OX=9606 GN=EXOSC4 PE=1 SV=3
2689	TRUE	O95834|EMAL2_HUMAN	181.291	6	6	10	8	8	12	6	21	0.8	1.5	3.5	Carbamidomethylation; Oxidation (M)	70678.8	Echinoderm microtubule-associated protein-like 2 OS=Homo sapiens OX=9606 GN=EML2 PE=1 SV=1
5022	TRUE	Q8WVR3|MA11_HUMAN	70.9489	1	1	7	5	8	12	4	14	0.714286	1.5	3.5		62596.9	Microtubule-associated protein 11 OS=Homo sapiens OX=9606 GN=MAP11 PE=1 SV=2
3919	TRUE	P62249|RS16_HUMAN	121.377	4	4	20	25	10	12	4	14	1.25	1.2	3.5	Oxidation (M)	16445.3	40S ribosomal protein S16 OS=Homo sapiens OX=9606 GN=RPS16 PE=1 SV=2
4805	TRUE	Q92982|NINJ1_HUMAN	80.1692	1	1		7	1		2	7	7	1	3.5	Oxidation (M)	16345.1	Ninjurin-1 OS=Homo sapiens OX=9606 GN=NINJ1 PE=1 SV=2
3843	TRUE	Q9H1H9|KI13A_HUMAN	124.892	5	3	6	9	1		2	7	1.5	1	3.5	Oxidation (M)	202308	Kinesin-like protein KIF13A OS=Homo sapiens OX=9606 GN=KIF13A PE=1 SV=2
4593	TRUE	Q14596|NBR1_HUMAN	89.7082	1	1					2	7			3.5		107413	Next to BRCA1 gene 1 protein OS=Homo sapiens OX=9606 GN=NBR1 PE=1 SV=3
5161	TRUE	Q96SY0|INT14_HUMAN	65.4793	1	1	5	7	6	11	5	17	1.4	1.83333	3.4		57470.8	Integrator complex subunit 14 OS=Homo sapiens OX=9606 GN=INTS14 PE=1 SV=2
4298	TRUE	Q99766|ATP5S_HUMAN	104.487	2	2		5	1		3	10	5	1	3.33333		24866	ATP synthase subunit s, mitochondrial OS=Homo sapiens OX=9606 GN=DMAC2L PE=1 SV=3
4292	TRUE	Q8WVM7|STAG1_HUMAN	104.724	3	1	2	9		5	4	13	4.5	5	3.25		144427	Cohesin subunit SA-1 OS=Homo sapiens OX=9606 GN=STAG1 PE=1 SV=3
3082	TRUE	O14662|STX16_HUMAN	161.058	4	4	24	14	5	10	4	13	0.583333	2	3.25		37031.2	Syntaxin-16 OS=Homo sapiens OX=9606 GN=STX16 PE=1 SV=3
2197	TRUE	Q9NR97|TLR8_HUMAN	205.215	10	10	11	17	1	23	13	42	1.54545	23	3.23077	Oxidation (M); Carbamidomethylation	119828	Toll-like receptor 8 OS=Homo sapiens OX=9606 GN=TLR8 PE=1 SV=1
2420	TRUE	Q92692|NECT2_HUMAN	194.011	5	5	14	10	2	10	9	29	0.714286	5	3.22222	Carbamidomethylation; Oxidation (M)	57742	Nectin-2 OS=Homo sapiens OX=9606 GN=NECTIN2 PE=1 SV=1
3555	TRUE	P11169|GTR3_HUMAN	138.024	3	3	6	7		5	8	25	1.16667	5	3.125	Oxidation (M)	53924.3	Solute carrier family 2, facilitated glucose transporter member 3 OS=Homo sapiens OX=9606 GN=SLC2A3 PE=1 SV=1
258	TRUE	P20591|MX1_HUMAN	368.506	25	23	135	156	35	147	96	297	1.15556	4.2	3.09375	Oxidation (M); Carbamidomethylation	75520.3	Interferon-induced GTP-binding protein Mx1 OS=Homo sapiens OX=9606 GN=MX1 PE=1 SV=4
1707	TRUE	Q7Z6J4|FGD2_HUMAN	230.541	11	11	4	4		10	9	27	1	10	3	Carbamidomethylation	74892.3	FYVE, RhoGEF and PH domain-containing protein 2 OS=Homo sapiens OX=9606 GN=FGD2 PE=1 SV=1
5469	TRUE	A0A0C4DH38|HV551_HUMAN	53.4723	1	1		6		6		3	6	6	3		12674.5	Immunoglobulin heavy variable 5-51 OS=Homo sapiens OX=9606 GN=IGHV5-51 PE=3 SV=1
5469	TRUE	A0A0J9YXX1|HV5X1_HUMAN	53.4723	1	1		6		6		3	6	6	3		12772.6	Immunoglobulin heavy variable 5-10-1 OS=Homo sapiens OX=9606 GN=IGHV5-10-1 PE=3 SV=1
5469	TRUE	A0A0G2JMI3|HV692_HUMAN	53.4723	1	1		6		6		3	6	6	3		12870.5	Immunoglobulin heavy variable 1-69-2 OS=Homo sapiens OX=9606 GN=IGHV1-69-2 PE=3 SV=2
5224	TRUE	Q92622|RUBIC_HUMAN	62.5213	2	2	3	6		5	1	3	2	5	3		108622	Run domain Beclin-1-interacting and cysteine-rich domain-containing protein OS=Homo sapiens OX=9606 GN=RUBCN PE=1 SV=4
4632	TRUE	Q00978|IRF9_HUMAN	87.9105	2	2	3			5		3	0.333333	5	3	Carbamidomethylation	43696.3	Interferon regulatory factor 9 OS=Homo sapiens OX=9606 GN=IRF9 PE=1 SV=1
3764	TRUE	O60674|JAK2_HUMAN	128.356	3	3			1	5		3		5	3		130674	Tyrosine-protein kinase JAK2 OS=Homo sapiens OX=9606 GN=JAK2 PE=1 SV=2
3057	TRUE	Q9HD26|GOPC_HUMAN	162.084	4	4		7		4	5	15	7	4	3	Carbamidomethylation	50520	Golgi-associated PDZ and coiled-coil motif-containing protein OS=Homo sapiens OX=9606 GN=GOPC PE=1 SV=1
4934	TRUE	Q9Y2R4|DDX52_HUMAN	74.5029	1	1	1	1		4		3	1	4	3		67498.1	Probable ATP-dependent RNA helicase DDX52 OS=Homo sapiens OX=9606 GN=DDX52 PE=1 SV=3
4708	TRUE	Q15722|LT4R1_HUMAN	84.7368	1	1		3		3	2	6	3	3	3		37557.4	Leukotriene B4 receptor 1 OS=Homo sapiens OX=9606 GN=LTB4R PE=1 SV=2
4239	TRUE	P16220|CREB1_HUMAN	106.981	3	3	3	5		3	1	3	1.66667	3	3		35136.3	Cyclic AMP-responsive element-binding protein 1 OS=Homo sapiens OX=9606 GN=CREB1 PE=1 SV=3
4487	TRUE	P04921|GLPC_HUMAN	94.5714	1	1	7	4		3		3	0.571429	3	3		13810.6	Glycophorin-C OS=Homo sapiens OX=9606 GN=GYPC PE=1 SV=1
3870	TRUE	P51784|UBP11_HUMAN	123.556	2	2			2	6	4	12		3	3		109817	Ubiquitin carboxyl-terminal hydrolase 11 OS=Homo sapiens OX=9606 GN=USP11 PE=1 SV=3
2391	TRUE	P20036|DPA1_HUMAN	195.05	5	5	2	5	10	29		3	2.5	2.9	3	Carbamidomethylation	29380.6	HLA class II histocompatibility antigen, DP alpha 1 chain OS=Homo sapiens OX=9606 GN=HLA-DPA1 PE=1 SV=1
3523	FALSE	Q15560|TCEA2_HUMAN	69.1172	1	1	1	8	2	5	1	3	8	2.5	3	Carbamidomethylation	33600.8	Transcription elongation factor A protein 2 OS=Homo sapiens OX=9606 GN=TCEA2 PE=1 SV=1
4854	TRUE	P78410|BT3A2_HUMAN	77.9759	2	1		4		2		3	4	2	3	Oxidation (M)	36427.6	Butyrophilin subfamily 3 member A2 OS=Homo sapiens OX=9606 GN=BTN3A2 PE=1 SV=2
599	FALSE	O15084|ANR28_HUMAN	88.1666	1	1	5	4	3	5	1	3	0.8	1.66667	3		112966	Serine/threonine-protein phosphatase 6 regulatory ankyrin repeat subunit A OS=Homo sapiens OX=9606 GN=ANKRD28 PE=1 SV=5
4750	TRUE	Q8N6L1|KTAP2_HUMAN	82.5939	1	1		3	4	6		3	3	1.5	3		14678.5	Keratinocyte-associated protein 2 OS=Homo sapiens OX=9606 GN=KRTCAP2 PE=1 SV=2
2925	TRUE	Q86WA9|S2611_HUMAN	168.514	5	5	7	5	21	24	2	6	0.714286	1.14286	3	Oxidation (M)	65299	Sodium-independent sulfate anion transporter OS=Homo sapiens OX=9606 GN=SLC26A11 PE=1 SV=2
3569	TRUE	Q9NVV0|TM38B_HUMAN	137.516	3	3	12	14	16	17		3	1.16667	1.0625	3		32509.8	Trimeric intracellular cation channel type B OS=Homo sapiens OX=9606 GN=TMEM38B PE=1 SV=1
3960	TRUE	P34896|GLYC_HUMAN	119.566	4	3	1	4	1		2	6	4	1	3	Carbamidomethylation	53082.6	Serine hydroxymethyltransferase, cytosolic OS=Homo sapiens OX=9606 GN=SHMT1 PE=1 SV=1
4113	TRUE	Q86WN1|FCSD1_HUMAN	113.444	2	2		3		1	1	3	3	1	3	Oxidation (M)	76942.2	F-BAR and double SH3 domains protein 1 OS=Homo sapiens OX=9606 GN=FCHSD1 PE=1 SV=1
4443	TRUE	Q8N4P3|MESH1_HUMAN	97.4419	2	2	1	3	1	1	1	3	3	1	3		20329	Guanosine-3',5'-bis(diphosphate) 3'-pyrophosphohydrolase MESH1 OS=Homo sapiens OX=9606 GN=HDDC3 PE=1 SV=3
4782	TRUE	Q9Y2H1|ST38L_HUMAN	81.2527	2	1	3	3		1		3	1	1	3	Carbamidomethylation	54002.8	Serine/threonine-protein kinase 38-like OS=Homo sapiens OX=9606 GN=STK38L PE=1 SV=3
4878	TRUE	Q96NB3|ZN830_HUMAN	76.9138	2	2		1	1			3	1	1	3		41998.7	Zinc finger protein 830 OS=Homo sapiens OX=9606 GN=ZNF830 PE=1 SV=2
5775	TRUE	O95810|CAVN2_HUMAN	37.8824	1	1	1	1		1	1	3	1	1	3		47173.2	Caveolae-associated protein 2 OS=Homo sapiens OX=9606 GN=CAVIN2 PE=1 SV=3
4402	TRUE	Q9Y606|TRUA_HUMAN	99.0394	3	3	10	8	4	4	1	3	0.8	1	3		47470	tRNA pseudouridine synthase A OS=Homo sapiens OX=9606 GN=PUS1 PE=1 SV=3
3910	TRUE	P18887|XRCC1_HUMAN	121.745	3	3	15	11	2	2		3	0.733333	1	3		69476.5	DNA repair protein XRCC1 OS=Homo sapiens OX=9606 GN=XRCC1 PE=1 SV=2
4347	TRUE	Q6ZNB6|NFXL1_HUMAN	101.253	3	3	7	3		1	1	3	0.428571	1	3		101339	NF-X1-type zinc finger protein NFXL1 OS=Homo sapiens OX=9606 GN=NFXL1 PE=1 SV=2
4804	TRUE	P02533|K1C14_HUMAN	80.2308	3	2			1		1	3		1	3		51561.5	Keratin, type I cytoskeletal 14 OS=Homo sapiens OX=9606 GN=KRT14 PE=1 SV=4
4534	TRUE	P06746|DPOLB_HUMAN	92.1207	3	3	4	7	3	2		3	1.75	0.666667	3		38177.6	DNA polymerase beta OS=Homo sapiens OX=9606 GN=POLB PE=1 SV=3
3487	TRUE	Q5VW38|GP107_HUMAN	141.133	6	6	6	8	3	2	2	6	1.33333	0.666667	3	Carbamidomethylation	66990.4	Protein GPR107 OS=Homo sapiens OX=9606 GN=GPR107 PE=1 SV=1
1830	TRUE	P68871|HBB_HUMAN	223.861	9	8	36	52	12	7	2	6	1.44444	0.583333	3	Oxidation (M); Carbamidomethylation	15998.4	Hemoglobin subunit beta OS=Homo sapiens OX=9606 GN=HBB PE=1 SV=2
4816	TRUE	Q9UER7|DAXX_HUMAN	79.5925	2	2	3	4	2	1		3	1.33333	0.5	3		81372.6	Death domain-associated protein 6 OS=Homo sapiens OX=9606 GN=DAXX PE=1 SV=2
4186	TRUE	Q86YB8|ERO1B_HUMAN	109.574	3	1	4	5	2		1	3	1.25	0.5	3		53543.2	ERO1-like protein beta OS=Homo sapiens OX=9606 GN=ERO1B PE=1 SV=2
4422	TRUE	Q9Y2J8|PADI2_HUMAN	98.2321	3	3	6	6	2		1	3	1	0.5	3		75563.9	Protein-arginine deiminase type-2 OS=Homo sapiens OX=9606 GN=PADI2 PE=1 SV=2
4438	TRUE	Q5BJD5|TM41B_HUMAN	97.6037	1	1	4	2	8	3		3	0.5	0.375	3		32513.5	Transmembrane protein 41B OS=Homo sapiens OX=9606 GN=TMEM41B PE=1 SV=1
5870	TRUE	A6NES4|MRO2A_HUMAN	33.6379	1	1	1	4	10	3	1	3	4	0.3	3	Oxidation (M); Carbamidomethylation	189561	Maestro heat-like repeat-containing protein family member 2A OS=Homo sapiens OX=9606 GN=MROH2A PE=4 SV=4
4728	TRUE	Q8WUH6|TM263_HUMAN	83.6382	2	2	24	17	4			3	0.708333	0.25	3	Oxidation (M)	11748.4	Transmembrane protein 263 OS=Homo sapiens OX=9606 GN=TMEM263 PE=1 SV=1
4683	TRUE	Q9H7M9|VISTA_HUMAN	85.9058	2	2		11				3	11		3	Oxidation (M)	33908.4	V-type immunoglobulin domain-containing suppressor of T-cell activation OS=Homo sapiens OX=9606 GN=VSIR PE=1 SV=3
4514	TRUE	Q9Y232|CDYL_HUMAN	93.2053	1	1	1	6				3	6		3		66481.7	Chromodomain Y-like protein OS=Homo sapiens OX=9606 GN=CDYL PE=1 SV=2
4662	TRUE	Q9P0W2|HM20B_HUMAN	86.4897	2	2		6			1	3	6		3		35812.8	SWI/SNF-related matrix-associated actin-dependent regulator of chromatin subfamily E member 1-related OS=Homo sapiens OX=9606 GN=HMG20B PE=1 SV=1
4886	TRUE	Q6PJG2|MDEAS_HUMAN	76.5581	2	2		4				3	4		3		114989	Mitotic deacetylase-associated SANT domain protein OS=Homo sapiens OX=9606 GN=MIDEAS PE=1 SV=2
5349	TRUE	O43704|ST1B1_HUMAN	58.1893	1	1		4				3	4		3		34899.2	Sulfotransferase family cytosolic 1B member 1 OS=Homo sapiens OX=9606 GN=SULT1B1 PE=1 SV=2
4111	TRUE	Q8WWV3|RT4I1_HUMAN	113.485	3	3	4	15				3	3.75		3		43589.6	Reticulon-4-interacting protein 1, mitochondrial OS=Homo sapiens OX=9606 GN=RTN4IP1 PE=1 SV=2
4731	TRUE	Q92854|SEM4D_HUMAN	83.5538	1	1		1				3	1		3		96149.9	Semaphorin-4D OS=Homo sapiens OX=9606 GN=SEMA4D PE=1 SV=1
4776	TRUE	O95926|SYF2_HUMAN	81.6535	2	2		1			1	3	1		3		28722.4	Pre-mRNA-splicing factor SYF2 OS=Homo sapiens OX=9606 GN=SYF2 PE=1 SV=1
5415	TRUE	Q9BQB6|VKOR1_HUMAN	55.6626	1	1	1	1			1	3	1		3	Carbamidomethylation	18234.5	Vitamin K epoxide reductase complex subunit 1 OS=Homo sapiens OX=9606 GN=VKORC1 PE=1 SV=1
5051	TRUE	Q99683|M3K5_HUMAN	69.7507	3	3	2	1			1	3	0.5		3		154537	Mitogen-activated protein kinase kinase kinase 5 OS=Homo sapiens OX=9606 GN=MAP3K5 PE=1 SV=1
3482	FALSE	Q9HCH3|CPNE5_HUMAN	55.1061	1	1						3			3		65733.6	Copine-5 OS=Homo sapiens OX=9606 GN=CPNE5 PE=1 SV=2
3482	FALSE	Q8IYJ1|CPNE9_HUMAN	55.1061	1	1						3			3		61864.1	Copine-9 OS=Homo sapiens OX=9606 GN=CPNE9 PE=1 SV=3
4855	TRUE	Q15646|OASL_HUMAN	77.9753	1	1						3			3		59226	2'-5'-oligoadenylate synthase-like protein OS=Homo sapiens OX=9606 GN=OASL PE=1 SV=2
5358	TRUE	Q13444|ADA15_HUMAN	57.889	1	1						3			3		92959.2	Disintegrin and metalloproteinase domain-containing protein 15 OS=Homo sapiens OX=9606 GN=ADAM15 PE=1 SV=4
5563	TRUE	Q6DD87|ZN787_HUMAN	48.3511	1	1						3			3		40428.4	Zinc finger protein 787 OS=Homo sapiens OX=9606 GN=ZNF787 PE=1 SV=4
5601	TRUE	O94868|FCSD2_HUMAN	46.8744	1	1						3			3		84276.4	F-BAR and double SH3 domains protein 2 OS=Homo sapiens OX=9606 GN=FCHSD2 PE=1 SV=3
5768	TRUE	Q96AZ6|ISG20_HUMAN	38.4432	1	1						3			3		20363.5	Interferon-stimulated gene 20 kDa protein OS=Homo sapiens OX=9606 GN=ISG20 PE=1 SV=2
5797	TRUE	Q2TB90|HKDC1_HUMAN	36.8878	1	1						3			3	Oxidation (M)	102545	Hexokinase HKDC1 OS=Homo sapiens OX=9606 GN=HKDC1 PE=1 SV=3
2277	TRUE	Q7Z6K5|ARPIN_HUMAN	200.68	7	7	14	9	19	20	10	29	0.642857	1.05263	2.9	Oxidation (M)	24943	Arpin OS=Homo sapiens OX=9606 GN=ARPIN PE=1 SV=1
1019	TRUE	P09914|IFIT1_HUMAN	276.252	13	13	9	22	6	31	35	100	2.44444	5.16667	2.85714	Carbamidomethylation; Oxidation (M)	55360.3	Interferon-induced protein with tetratricopeptide repeats 1 OS=Homo sapiens OX=9606 GN=IFIT1 PE=1 SV=2
2938	TRUE	Q8IZ07|AN13A_HUMAN	167.952	6	6		4	2	8	11	31	4	4	2.81818		67619.1	Ankyrin repeat domain-containing protein 13A OS=Homo sapiens OX=9606 GN=ANKRD13A PE=1 SV=3
2997	TRUE	Q14164|IKKE_HUMAN	165.372	4	4	7	5	1	4	5	14	0.714286	4	2.8		80462.3	Inhibitor of nuclear factor kappa-B kinase subunit epsilon OS=Homo sapiens OX=9606 GN=IKBKE PE=1 SV=1
2623	TRUE	P28065|PSB9_HUMAN	184.256	6	6		6	24	27	14	39	6	1.125	2.78571	Oxidation (M)	23264.3	Proteasome subunit beta type-9 OS=Homo sapiens OX=9606 GN=PSMB9 PE=1 SV=2
4509	TRUE	Q8NBJ9|SIDT2_HUMAN	93.5816	3	3	4	3		2	4	11	0.75	2	2.75		94454.4	SID1 transmembrane family member 2 OS=Homo sapiens OX=9606 GN=SIDT2 PE=1 SV=2
4191	TRUE	P05090|APOD_HUMAN	109.318	2	2	8	7	11	19	4	11	0.875	1.72727	2.75	Carbamidomethylation	21275.5	Apolipoprotein D OS=Homo sapiens OX=9606 GN=APOD PE=1 SV=1
4491	TRUE	Q96D15|RCN3_HUMAN	94.4436	4	3	8	6			7	19	0.75		2.71429		37493	Reticulocalbin-3 OS=Homo sapiens OX=9606 GN=RCN3 PE=1 SV=1
3295	TRUE	Q96BN8|OTUL_HUMAN	150.17	4	4	8	13	15	14	13	35	1.625	0.933333	2.69231	Carbamidomethylation	40262.9	Ubiquitin thioesterase otulin OS=Homo sapiens OX=9606 GN=OTULIN PE=1 SV=3
3037	TRUE	Q7Z5L9|I2BP2_HUMAN	163.244	5	4	19	14	1	6	6	16	0.736842	6	2.66667	Carbamidomethylation	61024.6	Interferon regulatory factor 2-binding protein 2 OS=Homo sapiens OX=9606 GN=IRF2BP2 PE=1 SV=2
1792	TRUE	Q96JH7|VCIP1_HUMAN	225.747	10	10	21	24	14	18	12	32	1.14286	1.28571	2.66667	Carbamidomethylation; Oxidation (M)	134321	Deubiquitinating protein VCIP135 OS=Homo sapiens OX=9606 GN=VCPIP1 PE=1 SV=2
2065	FALSE	Q96LZ3|CANB2_HUMAN	74.4173	1	1	6	13	5	5	3	8	2.16667	1	2.66667		19533.2	Calcineurin subunit B type 2 OS=Homo sapiens OX=9606 GN=PPP3R2 PE=1 SV=3
5157	TRUE	Q8N128|F177A_HUMAN	65.7478	1	1	4	3	2	2	3	8	0.75	1	2.66667		23757.4	Protein FAM177A1 OS=Homo sapiens OX=9606 GN=FAM177A1 PE=1 SV=1
4320	TRUE	Q9BTE3|MCMBP_HUMAN	102.595	5	5			2	1	3	8		0.5	2.66667	Carbamidomethylation	72980.1	Mini-chromosome maintenance complex-binding protein OS=Homo sapiens OX=9606 GN=MCMBP PE=1 SV=2
1740	TRUE	Q8N1I0|DOCK4_HUMAN	228.916	8	8	6	10	8	17	19	50	1.66667	2.125	2.63158	Carbamidomethylation; Oxidation (M)	225206	Dedicator of cytokinesis protein 4 OS=Homo sapiens OX=9606 GN=DOCK4 PE=1 SV=3
2292	TRUE	P49662|CASP4_HUMAN	200.029	6	6	23	20	6	14	16	42	0.869565	2.33333	2.625	Oxidation (M); Carbamidomethylation	43262.2	Caspase-4 OS=Homo sapiens OX=9606 GN=CASP4 PE=1 SV=1
2114	TRUE	P80217|IN35_HUMAN	208.924	8	8	14	35	12	25	13	34	2.5	2.08333	2.61538	Carbamidomethylation	31546.4	Interferon-induced 35 kDa protein OS=Homo sapiens OX=9606 GN=IFI35 PE=1 SV=5
3909	TRUE	Q6PJ69|TRI65_HUMAN	121.785	3	3	7	10	8	9	5	13	1.42857	1.125	2.6		57353.4	Tripartite motif-containing protein 65 OS=Homo sapiens OX=9606 GN=TRIM65 PE=1 SV=3
4197	TRUE	Q9UQN3|CHM2B_HUMAN	109.057	3	3	10	11	6	6	5	13	1.1	1	2.6	Oxidation (M)	23906.5	Charged multivesicular body protein 2b OS=Homo sapiens OX=9606 GN=CHMP2B PE=1 SV=1
2339	TRUE	P09913|IFIT2_HUMAN	197.886	8	7	4	15		7	9	23	3.75	7	2.55556	Carbamidomethylation; Oxidation (M)	54632.2	Interferon-induced protein with tetratricopeptide repeats 2 OS=Homo sapiens OX=9606 GN=IFIT2 PE=1 SV=1
3275	TRUE	P61626|LYSC_HUMAN	150.858	4	4	2	13		6	2	5	6.5	6	2.5	Carbamidomethylation	16537	Lysozyme C OS=Homo sapiens OX=9606 GN=LYZ PE=1 SV=1
4880	TRUE	Q9HD34|LYRM4_HUMAN	76.8463	1	1	2	2	3	7	2	5	1	2.33333	2.5		10758.4	LYR motif-containing protein 4 OS=Homo sapiens OX=9606 GN=LYRM4 PE=1 SV=1
3802	TRUE	Q9UJV9|DDX41_HUMAN	126.816	5	5	5	8		2	2	5	1.6	2	2.5		69837.6	Probable ATP-dependent RNA helicase DDX41 OS=Homo sapiens OX=9606 GN=DDX41 PE=1 SV=2
236	FALSE	Q8NDI1|EHBP1_HUMAN	56.8246	1	1	2	3	1	2	2	5	1.5	2	2.5		140017	EH domain-binding protein 1 OS=Homo sapiens OX=9606 GN=EHBP1 PE=1 SV=3
5854	TRUE	P33076|C2TA_HUMAN	34.2404	1	1	5	4		2	2	5	0.8	2	2.5	Carbamidomethylation	123514	MHC class II transactivator OS=Homo sapiens OX=9606 GN=CIITA PE=1 SV=3
4650	TRUE	Q7Z3U7|MON2_HUMAN	86.7866	2	2	6	8	3	4	2	5	1.33333	1.33333	2.5		190359	Protein MON2 homolog OS=Homo sapiens OX=9606 GN=MON2 PE=1 SV=3
5351	TRUE	Q9NS00|C1GLT_HUMAN	58.1138	2	2		1		1	2	5	1	1	2.5		42202.8	Glycoprotein-N-acetylgalactosamine 3-beta-galactosyltransferase 1 OS=Homo sapiens OX=9606 GN=C1GALT1 PE=1 SV=1
4600	TRUE	Q9BZ23|PANK2_HUMAN	89.239	1	1	7	5	7	7	2	5	0.714286	1	2.5		62680.6	Pantothenate kinase 2, mitochondrial OS=Homo sapiens OX=9606 GN=PANK2 PE=1 SV=3
1830	FALSE	P02042|HBD_HUMAN	169.731	5	4	20	31	12	7	2	5	1.55	0.583333	2.5		16055.5	Hemoglobin subunit delta OS=Homo sapiens OX=9606 GN=HBD PE=1 SV=2
4729	TRUE	Q15853|USF2_HUMAN	83.5872	2	1	1	4	7	4	2	5	4	0.571429	2.5		36954.7	Upstream stimulatory factor 2 OS=Homo sapiens OX=9606 GN=USF2 PE=1 SV=1
3334	TRUE	Q9UEY8|ADDG_HUMAN	148.553	6	6	23	13	2		2	5	0.565217	0.5	2.5		79154.6	Gamma-adducin OS=Homo sapiens OX=9606 GN=ADD3 PE=1 SV=1
1577	FALSE	Q9NVD7|PARVA_HUMAN	77.3842	1	1		1	6	1	2	5	1	0.166667	2.5		42243.7	Alpha-parvin OS=Homo sapiens OX=9606 GN=PARVA PE=1 SV=1
4566	TRUE	Q13503|MED21_HUMAN	91.0145	2	2	5	4			2	5	0.8		2.5		15564.3	Mediator of RNA polymerase II transcription subunit 21 OS=Homo sapiens OX=9606 GN=MED21 PE=1 SV=1
641	TRUE	P32456|GBP2_HUMAN	311.67	20	14	62	139	34	108	77	192	2.24194	3.17647	2.49351	Oxidation (M); Carbamidomethylation	67209	Guanylate-binding protein 2 OS=Homo sapiens OX=9606 GN=GBP2 PE=1 SV=3
546	TRUE	P01903|DRA_HUMAN	323.416	14	13	66	154	53	169	64	159	2.33333	3.18868	2.48438	Carbamidomethylation	28606.9	HLA class II histocompatibility antigen, DR alpha chain OS=Homo sapiens OX=9606 GN=HLA-DRA PE=1 SV=1
3954	TRUE	Q05048|CSTF1_HUMAN	119.977	3	3	5	3		8	7	17	0.6	8	2.42857	Oxidation (M)	48357.7	Cleavage stimulation factor subunit 1 OS=Homo sapiens OX=9606 GN=CSTF1 PE=1 SV=1
2546	TRUE	O75475|PSIP1_HUMAN	187.436	7	7	24	25	8	1	7	17	1.04167	0.125	2.42857	Carbamidomethylation	60103.2	PC4 and SFRS1-interacting protein OS=Homo sapiens OX=9606 GN=PSIP1 PE=1 SV=1
81	TRUE	P28838|AMPL_HUMAN	435.115	43	43	377	662	349	705	383	928	1.75597	2.02006	2.42298	Oxidation (M); Carbamidomethylation	56166.3	Cytosol aminopeptidase OS=Homo sapiens OX=9606 GN=LAP3 PE=1 SV=3
2375	TRUE	P07332|FES_HUMAN	195.639	7	7	9	12	5	17	10	24	1.33333	3.4	2.4		93496.6	Tyrosine-protein kinase Fes/Fps OS=Homo sapiens OX=9606 GN=FES PE=1 SV=3
3120	TRUE	P01009|A1AT_HUMAN	159.27	4	4	5	4	1	1	5	12	0.8	1	2.4		46736.5	Alpha-1-antitrypsin OS=Homo sapiens OX=9606 GN=SERPINA1 PE=1 SV=3
3820	TRUE	P23511|NFYA_HUMAN	125.942	2	2	5	6	4		5	12	1.2	0.25	2.4	Oxidation (M)	36876.7	Nuclear transcription factor Y subunit alpha OS=Homo sapiens OX=9606 GN=NFYA PE=1 SV=2
3394	TRUE	O00217|NDUS8_HUMAN	145.375	4	4	11	25		7	8	19	2.27273	7	2.375	Carbamidomethylation; Oxidation (M)	23705.1	NADH dehydrogenase [ubiquinone] iron-sulfur protein 8, mitochondrial OS=Homo sapiens OX=9606 GN=NDUFS8 PE=1 SV=1
879	TRUE	P53634|CATC_HUMAN	287.479	13	13	48	62	32	69	40	94	1.29167	2.15625	2.35	Oxidation (M); Carbamidomethylation	51853.8	Dipeptidyl peptidase 1 OS=Homo sapiens OX=9606 GN=CTSC PE=1 SV=2
2788	TRUE	Q9BYM8|HOIL1_HUMAN	176.167	6	6	2	3		5	6	14	1.5	5	2.33333	Carbamidomethylation	57571.6	RanBP-type and C3HC4-type zinc finger-containing protein 1 OS=Homo sapiens OX=9606 GN=RBCK1 PE=1 SV=2
2218	TRUE	P51608|MECP2_HUMAN	204.162	7	7	18	20	7	21	9	21	1.11111	3	2.33333	Oxidation (M)	52440.6	Methyl-CpG-binding protein 2 OS=Homo sapiens OX=9606 GN=MECP2 PE=1 SV=1
827	FALSE	P11274|BCR_HUMAN	76.0899	1	1	4	6	2	3	3	7	1.5	1.5	2.33333		142819	Breakpoint cluster region protein OS=Homo sapiens OX=9606 GN=BCR PE=1 SV=2
4666	TRUE	Q9Y2V7|COG6_HUMAN	86.389	2	2	4	5	5	7	3	7	1.25	1.4	2.33333		73279	Conserved oligomeric Golgi complex subunit 6 OS=Homo sapiens OX=9606 GN=COG6 PE=1 SV=2
3912	TRUE	P61244|MAX_HUMAN	121.707	2	2	6	8	15	20	6	14	1.33333	1.33333	2.33333		18274.8	Protein max OS=Homo sapiens OX=9606 GN=MAX PE=1 SV=1
4977	TRUE	Q9H295|DCSTP_HUMAN	72.5748	1	1	1		6		3	7	1	0.166667	2.33333		53392.6	Dendritic cell-specific transmembrane protein OS=Homo sapiens OX=9606 GN=DCSTAMP PE=1 SV=1
156	TRUE	Q63HN8|RN213_HUMAN	394.986	69	69	47	127	31	140	126	289	2.70213	4.51613	2.29365	Oxidation (M); Carbamidomethylation	591407	E3 ubiquitin-protein ligase RNF213 OS=Homo sapiens OX=9606 GN=RNF213 PE=1 SV=3
3905	TRUE	P0CAP2|GRL1A_HUMAN	122.001	2	2			1		7	16		1	2.28571		41739.5	DNA-directed RNA polymerase II subunit GRINL1A OS=Homo sapiens OX=9606 GN=POLR2M PE=1 SV=1
3905	TRUE	Q9BZD3|GCOM2_HUMAN	122.001	2	2			1		7	16		1	2.28571		41712.6	Putative GRINL1B complex locus protein 2 OS=Homo sapiens OX=9606 GN=GCOM2 PE=5 SV=2
2812	TRUE	O14545|TRAD1_HUMAN	175.044	5	5	6	8	1	13	4	9	1.33333	13	2.25	Carbamidomethylation	64841.1	TRAF-type zinc finger domain-containing protein 1 OS=Homo sapiens OX=9606 GN=TRAFD1 PE=1 SV=1
3676	TRUE	Q5VWJ9|SNX30_HUMAN	132.189	5	5	10	5	2	3	4	9	0.5	1.5	2.25	Carbamidomethylation	49676.6	Sorting nexin-30 OS=Homo sapiens OX=9606 GN=SNX30 PE=1 SV=1
285	FALSE	Q9UKU0|ACSL6_HUMAN	107.432	2	2	7	4	3	4	4	9	0.571429	1.33333	2.25		77751.9	Long-chain-fatty-acid--CoA ligase 6 OS=Homo sapiens OX=9606 GN=ACSL6 PE=1 SV=4
3745	TRUE	O75689|ADAP1_HUMAN	129.597	3	2			1		4	9		1	2.25		43395.3	Arf-GAP with dual PH domain-containing protein 1 OS=Homo sapiens OX=9606 GN=ADAP1 PE=1 SV=2
5103	TRUE	Q6NT16|S18B1_HUMAN	67.6482	1	1			2	1	4	9		0.5	2.25		48868.7	MFS-type transporter SLC18B1 OS=Homo sapiens OX=9606 GN=SLC18B1 PE=1 SV=1
4709	TRUE	Q7Z6B0|CCD91_HUMAN	84.6987	2	2		2			4	9	2		2.25		49971.2	Coiled-coil domain-containing protein 91 OS=Homo sapiens OX=9606 GN=CCDC91 PE=1 SV=2
3673	FALSE	Q4VC44|FWCH1_HUMAN	59.4258	1	1	4	2			4	9	0.5		2.25		80108.4	FLYWCH-type zinc finger-containing protein 1 OS=Homo sapiens OX=9606 GN=FLYWCH1 PE=1 SV=2
1315	TRUE	P13645|K1C10_HUMAN	255.09	13	13	50	39	69	57	29	64	0.78	0.826087	2.2069	Oxidation (M); Carbamidomethylation	58827.1	Keratin, type I cytoskeletal 10 OS=Homo sapiens OX=9606 GN=KRT10 PE=1 SV=6
2009	TRUE	Q9BYX4|IFIH1_HUMAN	214.66	9	9	27	11	3	30	10	22	0.407407	10	2.2	Oxidation (M)	116689	Interferon-induced helicase C domain-containing protein 1 OS=Homo sapiens OX=9606 GN=IFIH1 PE=1 SV=3
3407	TRUE	Q8IVM0|CCD50_HUMAN	144.986	6	6	9	8	4	10	5	11	0.888889	2.5	2.2	Oxidation (M); Carbamidomethylation	35822	Coiled-coil domain-containing protein 50 OS=Homo sapiens OX=9606 GN=CCDC50 PE=1 SV=1
3437	TRUE	Q01201|RELB_HUMAN	142.938	3	3	1	3	5	5	5	11	3	1	2.2		62134.5	Transcription factor RelB OS=Homo sapiens OX=9606 GN=RELB PE=1 SV=2
2929	TRUE	Q9Y6W3|CAN7_HUMAN	168.366	7	7	6	7	17	13	10	22	1.16667	0.764706	2.2	Carbamidomethylation	92652.4	Calpain-7 OS=Homo sapiens OX=9606 GN=CAPN7 PE=1 SV=1
2946	TRUE	Q9C0I1|MTMRC_HUMAN	167.653	9	9	19	18	5	3	5	11	0.947368	0.6	2.2	Carbamidomethylation	86147.7	Myotubularin-related protein 12 OS=Homo sapiens OX=9606 GN=MTMR12 PE=1 SV=2
4315	TRUE	P17947|SPI1_HUMAN	102.933	2	2	5	7	4	1	5	11	1.4	0.25	2.2		31083	Transcription factor PU.1 OS=Homo sapiens OX=9606 GN=SPI1 PE=1 SV=2
2437	TRUE	Q5K651|SAMD9_HUMAN	193.394	9	8	10	17	5	15	12	26	1.7	3	2.16667		184281	Sterile alpha motif domain-containing protein 9 OS=Homo sapiens OX=9606 GN=SAMD9 PE=1 SV=1
244	FALSE	Q6QEF8|CORO6_HUMAN	68.9528	1	1	8	6	7	7	6	13	0.75	1	2.16667	Carbamidomethylation; Oxidation (M)	52762	Coronin-6 OS=Homo sapiens OX=9606 GN=CORO6 PE=1 SV=2
1264	TRUE	Q53GL0|PKHO1_HUMAN	257.714	12	12	18	31	13	26	20	43	1.72222	2	2.15	Oxidation (M)	46237	Pleckstrin homology domain-containing family O member 1 OS=Homo sapiens OX=9606 GN=PLEKHO1 PE=1 SV=2
3418	TRUE	O43464|HTRA2_HUMAN	144.406	4	4			2	3	7	15		1.5	2.14286		48840.8	Serine protease HTRA2, mitochondrial OS=Homo sapiens OX=9606 GN=HTRA2 PE=1 SV=2
2721	TRUE	Q9ULG6|CCPG1_HUMAN	179.899	7	7	22	15	3	22	9	19	0.681818	7.33333	2.11111	Carbamidomethylation	87340.4	Cell cycle progression protein 1 OS=Homo sapiens OX=9606 GN=CCPG1 PE=1 SV=3
3278	TRUE	Q9H4E7|DEFI6_HUMAN	150.644	5	5	1	1	5	6	9	19	1	1.2	2.11111	Oxidation (M)	73910.3	Differentially expressed in FDCP 6 homolog OS=Homo sapiens OX=9606 GN=DEF6 PE=1 SV=1
1583	TRUE	Q12882|DPYD_HUMAN	237.539	11	11	38	65		1	9	19	1.71053	1	2.11111	Oxidation (M)	111401	Dihydropyrimidine dehydrogenase [NADP(+)] OS=Homo sapiens OX=9606 GN=DPYD PE=1 SV=2
78	TRUE	P04179|SODM_HUMAN	435.925	31	31	501	699	474	1002	430	905	1.39521	2.11392	2.10465	Carbamidomethylation; Oxidation (M)	24750.1	Superoxide dismutase [Mn], mitochondrial OS=Homo sapiens OX=9606 GN=SOD2 PE=1 SV=3
2556	TRUE	Q02252|MMSA_HUMAN	186.946	9	9	12	10	7	11	10	21	0.833333	1.57143	2.1	Carbamidomethylation	57839.7	Methylmalonate-semialdehyde dehydrogenase [acylating], mitochondrial OS=Homo sapiens OX=9606 GN=ALDH6A1 PE=1 SV=2
1395	TRUE	P42574|CASP3_HUMAN	249.991	9	9	19	25	35	38	30	63	1.31579	1.08571	2.1	Oxidation (M); Carbamidomethylation	31607.9	Caspase-3 OS=Homo sapiens OX=9606 GN=CASP3 PE=1 SV=2
2464	TRUE	Q13325|IFIT5_HUMAN	191.898	7	7	10	17		5	12	25	1.7	5	2.08333	Carbamidomethylation	55846.7	Interferon-induced protein with tetratricopeptide repeats 5 OS=Homo sapiens OX=9606 GN=IFIT5 PE=1 SV=1
2172	TRUE	P19474|RO52_HUMAN	206.132	8	8	14	25	22	32	12	25	1.78571	1.45455	2.08333	Oxidation (M)	54169.7	E3 ubiquitin-protein ligase TRIM21 OS=Homo sapiens OX=9606 GN=TRIM21 PE=1 SV=1
2505	TRUE	Q9NPP4|NLRC4_HUMAN	190.235	9	9	10	8	13	12	12	25	0.8	0.923077	2.08333		116159	NLR family CARD domain-containing protein 4 OS=Homo sapiens OX=9606 GN=NLRC4 PE=1 SV=2
562	TRUE	O14879|IFIT3_HUMAN	320.568	19	18	39	44	23	75	51	106	1.12821	3.26087	2.07843	Oxidation (M); Carbamidomethylation	55984.8	Interferon-induced protein with tetratricopeptide repeats 3 OS=Homo sapiens OX=9606 GN=IFIT3 PE=1 SV=1
1760	TRUE	P11908|PRPS2_HUMAN	228.044	10	3	18	14	27	16	15	31	0.777778	0.592593	2.06667	Carbamidomethylation	34769.1	Ribose-phosphate pyrophosphokinase 2 OS=Homo sapiens OX=9606 GN=PRPS2 PE=1 SV=2
612	TRUE	Q9UL46|PSME2_HUMAN	314.852	14	14	57	95	77	130	78	159	1.66667	1.68831	2.03846	Oxidation (M)	27401.6	Proteasome activator complex subunit 2 OS=Homo sapiens OX=9606 GN=PSME2 PE=1 SV=4
1175	TRUE	P32189|GLPK_HUMAN	264.223	12	12	21	46	16	45	38	77	2.19048	2.8125	2.02632	Carbamidomethylation; Oxidation (M)	61244.6	Glycerol kinase OS=Homo sapiens OX=9606 GN=GK PE=1 SV=3
734	TRUE	P01911|DRB_HUMAN	301.735	12	3	45	82	41	74	44	89	1.82222	1.80488	2.02273	Oxidation (M); Carbamidomethylation	29966.1	HLA class II histocompatibility antigen, DRB1 beta chain OS=Homo sapiens OX=9606 GN=HLA-DRB1 PE=1 SV=2
3935	TRUE	Q9NP58|ABCB6_HUMAN	120.58	2	2	3		1	8	2	4	0.333333	8	2		93885.6	ATP-binding cassette sub-family B member 6, mitochondrial OS=Homo sapiens OX=9606 GN=ABCB6 PE=1 SV=1
4820	TRUE	Q9UGQ3|GTR6_HUMAN	79.5013	2	2			1	5		2		5	2		54539.3	Solute carrier family 2, facilitated glucose transporter member 6 OS=Homo sapiens OX=9606 GN=SLC2A6 PE=1 SV=2
3314	TRUE	Q8NCN5|PDPR_HUMAN	149.253	5	5	10	12	2	9	4	8	1.2	4.5	2	Oxidation (M)	99364.5	Pyruvate dehydrogenase phosphatase regulatory subunit, mitochondrial OS=Homo sapiens OX=9606 GN=PDPR PE=1 SV=2
5399	TRUE	Q13889|TF2H3_HUMAN	56.0907	1	1	1			4	1	2	1	4	2		34378	General transcription factor IIH subunit 3 OS=Homo sapiens OX=9606 GN=GTF2H3 PE=1 SV=2
5466	TRUE	P15735|PHKG2_HUMAN	53.7229	1	1	4	4		4	2	4	1	4	2		46442.2	Phosphorylase b kinase gamma catalytic chain, liver/testis isoform OS=Homo sapiens OX=9606 GN=PHKG2 PE=1 SV=1
3765	TRUE	Q9NRD1|FBX6_HUMAN	128.255	2	2		1		4	3	6	1	4	2		33932.6	F-box only protein 6 OS=Homo sapiens OX=9606 GN=FBXO6 PE=1 SV=1
4889	TRUE	Q9NRG0|CHRC1_HUMAN	76.4157	1	1	5		1	4		2	0.2	4	2		14710.5	Chromatin accessibility complex protein 1 OS=Homo sapiens OX=9606 GN=CHRAC1 PE=1 SV=1
2636	TRUE	Q9H3P2|NELFA_HUMAN	183.685	7	7	11	19	3	9	7	14	1.72727	3	2	Oxidation (M)	57276.8	Negative elongation factor A OS=Homo sapiens OX=9606 GN=NELFA PE=1 SV=3
5307	TRUE	P42766|RL35_HUMAN	59.9887	1	1	3	5		3	3	6	1.66667	3	2		14551.5	60S ribosomal protein L35 OS=Homo sapiens OX=9606 GN=RPL35 PE=1 SV=2
3141	TRUE	Q9NSI8|SAMN1_HUMAN	158.235	4	3	5	8		3	5	10	1.6	3	2		41708.1	SAM domain-containing protein SAMSN-1 OS=Homo sapiens OX=9606 GN=SAMSN1 PE=1 SV=1
3649	TRUE	Q9BTZ2|DHRS4_HUMAN	133.34	3	3	7	11	3	9	5	10	1.57143	3	2	Carbamidomethylation	29537.1	Dehydrogenase/reductase SDR family member 4 OS=Homo sapiens OX=9606 GN=DHRS4 PE=1 SV=3
3649	TRUE	Q6PKH6|DR4L2_HUMAN	133.34	3	3	7	11	3	9	5	10	1.57143	3	2	Carbamidomethylation	24585.6	Dehydrogenase/reductase SDR family member 4-like 2 OS=Homo sapiens OX=9606 GN=DHRS4L2 PE=2 SV=1
3138	TRUE	Q9UK61|TASOR_HUMAN	158.552	6	6	11	12	1	3	3	6	1.09091	3	2		189032	Protein TASOR OS=Homo sapiens OX=9606 GN=TASOR PE=1 SV=3
4075	TRUE	P48651|PTSS1_HUMAN	114.991	2	2	1			3		2	1	3	2	Carbamidomethylation	55527.6	Phosphatidylserine synthase 1 OS=Homo sapiens OX=9606 GN=PTDSS1 PE=1 SV=1
4304	TRUE	Q86VM9|ZCH18_HUMAN	103.766	2	2	4	4		3	1	2	1	3	2		106378	Zinc finger CCCH domain-containing protein 18 OS=Homo sapiens OX=9606 GN=ZC3H18 PE=1 SV=2
3708	TRUE	Q9BW85|YJU2_HUMAN	131.009	3	3	1			3	8	16	1	3	2	Oxidation (M)	37085.8	Splicing factor YJU2 OS=Homo sapiens OX=9606 GN=YJU2 PE=1 SV=1
4211	TRUE	Q9H930|SP14L_HUMAN	108.298	2	1	9	6	2	6	6	12	0.666667	3	2		67005.2	Nuclear body protein SP140-like protein OS=Homo sapiens OX=9606 GN=SP140L PE=1 SV=3
2726	TRUE	Q5HYK3|COQ5_HUMAN	179.657	5	5	6	6	2	5		2	1	2.5	2		37140.4	2-methoxy-6-polyprenyl-1,4-benzoquinol methylase, mitochondrial OS=Homo sapiens OX=9606 GN=COQ5 PE=1 SV=2
3899	TRUE	P61353|RL27_HUMAN	122.185	2	2		4	8	19	3	6	4	2.375	2	Oxidation (M)	15797.7	60S ribosomal protein L27 OS=Homo sapiens OX=9606 GN=RPL27 PE=1 SV=2
3243	TRUE	Q07889|SOS1_HUMAN	152.829	7	5	6	11		2	5	10	1.83333	2	2	Oxidation (M)	152464	Son of sevenless homolog 1 OS=Homo sapiens OX=9606 GN=SOS1 PE=1 SV=1
4873	TRUE	O43674|NDUB5_HUMAN	77.0218	1	1	7	10	2	4	5	10	1.42857	2	2		21750.3	NADH dehydrogenase [ubiquinone] 1 beta subcomplex subunit 5, mitochondrial OS=Homo sapiens OX=9606 GN=NDUFB5 PE=1 SV=1
3509	TRUE	O95260|ATE1_HUMAN	140.118	3	3	14	19	6	12	8	16	1.35714	2	2		59090.2	Arginyl-tRNA--protein transferase 1 OS=Homo sapiens OX=9606 GN=ATE1 PE=1 SV=2
4253	TRUE	Q9Y2I1|NISCH_HUMAN	106.479	5	5	5	5		2	1	2	1	2	2	Carbamidomethylation	166629	Nischarin OS=Homo sapiens OX=9606 GN=NISCH PE=1 SV=3
5449	TRUE	Q9NRZ5|PLCD_HUMAN	54.3982	1	1	1			2	1	2	1	2	2		44021.3	1-acyl-sn-glycerol-3-phosphate acyltransferase delta OS=Homo sapiens OX=9606 GN=AGPAT4 PE=1 SV=1
4932	TRUE	Q5TC12|ATPF1_HUMAN	74.5607	2	2	3	1		2		2	0.333333	2	2	Oxidation (M)	36436.5	ATP synthase mitochondrial F1 complex assembly factor 1 OS=Homo sapiens OX=9606 GN=ATPAF1 PE=1 SV=1
5905	TRUE	Q96PJ5|FCRL4_HUMAN	31.7543	1	1				2		2		2	2		57224.3	Fc receptor-like protein 4 OS=Homo sapiens OX=9606 GN=FCRL4 PE=1 SV=1
4690	TRUE	Q9H936|GHC1_HUMAN	85.4275	2	2				2	2	4		2	2	Carbamidomethylation	34470.2	Mitochondrial glutamate carrier 1 OS=Homo sapiens OX=9606 GN=SLC25A22 PE=1 SV=1
5040	TRUE	Q9H6A0|DEN2D_HUMAN	70.3638	1	1				2	3	6		2	2		53672	DENN domain-containing protein 2D OS=Homo sapiens OX=9606 GN=DENND2D PE=1 SV=2
3741	TRUE	Q15796|SMAD2_HUMAN	129.819	2	2	10	4	6	10	7	14	0.4	1.66667	2	Carbamidomethylation	52306.1	Mothers against decapentaplegic homolog 2 OS=Homo sapiens OX=9606 GN=SMAD2 PE=1 SV=1
4807	TRUE	P15924|DESP_HUMAN	80.147	2	2			3	5		2		1.66667	2		331774	Desmoplakin OS=Homo sapiens OX=9606 GN=DSP PE=1 SV=3
4120	TRUE	Q8N697|S15A4_HUMAN	113.158	3	3	6	3	2	3	1	2	0.5	1.5	2		62033.5	Solute carrier family 15 member 4 OS=Homo sapiens OX=9606 GN=SLC15A4 PE=1 SV=1
4554	TRUE	Q8NC44|RETR2_HUMAN	91.4301	2	2	3	3	3	4	1	2	1	1.33333	2		57830.1	Reticulophagy regulator 2 OS=Homo sapiens OX=9606 GN=RETREG2 PE=1 SV=3
4143	TRUE	P18440|ARY1_HUMAN	111.725	2	2			3	4	1	2		1.33333	2		33898.7	Arylamine N-acetyltransferase 1 OS=Homo sapiens OX=9606 GN=NAT1 PE=1 SV=2
3093	TRUE	P61081|UBC12_HUMAN	160.546	5	5	19	19	18	22	19	38	1	1.22222	2	Carbamidomethylation	20900	NEDD8-conjugating enzyme Ubc12 OS=Homo sapiens OX=9606 GN=UBE2M PE=1 SV=1
3398	TRUE	O15116|LSM1_HUMAN	145.298	3	3	4	5	5	6	5	10	1.25	1.2	2		15179.4	U6 snRNA-associated Sm-like protein LSm1 OS=Homo sapiens OX=9606 GN=LSM1 PE=1 SV=1
2786	TRUE	Q99973|TEP1_HUMAN	176.22	8	8	1	4		1	5	10	4	1	2	Carbamidomethylation	290490	Telomerase protein component 1 OS=Homo sapiens OX=9606 GN=TEP1 PE=1 SV=2
4442	TRUE	P32321|DCTD_HUMAN	97.5391	1	1		3		1	4	8	3	1	2	Carbamidomethylation	20016	Deoxycytidylate deaminase OS=Homo sapiens OX=9606 GN=DCTD PE=1 SV=2
3622	TRUE	Q8IYB8|SUV3_HUMAN	135.069	6	6	7	20		1	1	2	2.85714	1	2		87991.2	ATP-dependent RNA helicase SUPV3L1, mitochondrial OS=Homo sapiens OX=9606 GN=SUPV3L1 PE=1 SV=1
4386	TRUE	P56545|CTBP2_HUMAN	99.8033	2	2	2	4		1	2	4	2	1	2	Carbamidomethylation	48944.9	C-terminal-binding protein 2 OS=Homo sapiens OX=9606 GN=CTBP2 PE=1 SV=1
4913	TRUE	O43166|SI1L1_HUMAN	75.3062	2	2	2	3		1		2	1.5	1	2		200028	Signal-induced proliferation-associated 1-like protein 1 OS=Homo sapiens OX=9606 GN=SIPA1L1 PE=1 SV=4
4877	TRUE	Q9HBU6|EKI1_HUMAN	76.93	1	1	3	4	3	3	4	8	1.33333	1	2		50968.3	Ethanolamine kinase 1 OS=Homo sapiens OX=9606 GN=ETNK1 PE=1 SV=1
2708	TRUE	Q08623|HDHD1_HUMAN	180.633	6	6	30	35	10	10	14	28	1.16667	1	2	Oxidation (M)	25249.2	Pseudouridine-5'-phosphatase OS=Homo sapiens OX=9606 GN=PUDP PE=1 SV=3
3552	TRUE	Q7Z7K6|CENPV_HUMAN	138.091	3	3	7	8		1	1	2	1.14286	1	2	Carbamidomethylation	29945.9	Centromere protein V OS=Homo sapiens OX=9606 GN=CENPV PE=1 SV=1
4190	TRUE	Q8NI60|COQ8A_HUMAN	109.363	3	3	6	6		1	1	2	1	1	2		71950.2	Atypical kinase COQ8A, mitochondrial OS=Homo sapiens OX=9606 GN=COQ8A PE=1 SV=1
4961	TRUE	Q9NQZ5|STAR7_HUMAN	73.2818	2	2	2			1	3	6	0.5	1	2	Carbamidomethylation	43113.2	StAR-related lipid transfer protein 7, mitochondrial OS=Homo sapiens OX=9606 GN=STARD7 PE=1 SV=2
4226	TRUE	Q9NYB9|ABI2_HUMAN	107.686	3	1	2		3	3	3	6	0.5	1	2	Oxidation (M); Carbamidomethylation	55663.2	Abl interactor 2 OS=Homo sapiens OX=9606 GN=ABI2 PE=1 SV=1
4745	TRUE	Q8NCF5|NF2IP_HUMAN	82.6764	2	2	3			1	1	2	0.333333	1	2		45816.8	NFATC2-interacting protein OS=Homo sapiens OX=9606 GN=NFATC2IP PE=1 SV=1
4846	TRUE	Q13595|TRA2A_HUMAN	78.678	1	1	3		2	2	2	4	0.333333	1	2		32688.6	Transformer-2 protein homolog alpha OS=Homo sapiens OX=9606 GN=TRA2A PE=1 SV=1
4161	TRUE	Q9UEE9|CFDP1_HUMAN	110.627	3	3	5	1	1	1	2	4	0.2	1	2		33592.9	Craniofacial development protein 1 OS=Homo sapiens OX=9606 GN=CFDP1 PE=1 SV=1
5067	TRUE	Q96AG3|S2546_HUMAN	69.0828	1	1	5		1		2	4	0.2	1	2		46174	Solute carrier family 25 member 46 OS=Homo sapiens OX=9606 GN=SLC25A46 PE=1 SV=1
5076	TRUE	Q12968|NFAC3_HUMAN	68.8486	2	2	8			1		2	0.125	1	2	Carbamidomethylation	115594	Nuclear factor of activated T-cells, cytoplasmic 3 OS=Homo sapiens OX=9606 GN=NFATC3 PE=1 SV=1
305	FALSE	Q5JQF8|PAP1M_HUMAN	55.8914	1	1				1		2		1	2		22799	Polyadenylate-binding protein 1-like 2 OS=Homo sapiens OX=9606 GN=PABPC1L2A PE=2 SV=1
5314	TRUE	P08779|K1C16_HUMAN	59.7376	2	1			1			2		1	2		51267.8	Keratin, type I cytoskeletal 16 OS=Homo sapiens OX=9606 GN=KRT16 PE=1 SV=4
5427	TRUE	Q9BV68|RN126_HUMAN	55.2801	1	1			1			2		1	2	Carbamidomethylation	33861.5	E3 ubiquitin-protein ligase RNF126 OS=Homo sapiens OX=9606 GN=RNF126 PE=1 SV=2
5118	TRUE	Q8WU10|PYRD1_HUMAN	67.0701	1	1				1	1	2		1	2		55792.9	Pyridine nucleotide-disulfide oxidoreductase domain-containing protein 1 OS=Homo sapiens OX=9606 GN=PYROXD1 PE=1 SV=1
2912	TRUE	P00167|CYB5_HUMAN	169.293	5	5	17	18	15	13	8	16	1.05882	0.866667	2		15330.1	Cytochrome b5 OS=Homo sapiens OX=9606 GN=CYB5A PE=1 SV=2
5345	TRUE	Q8TF64|GIPC3_HUMAN	58.6726	1	1	6	4	7	6		2	0.666667	0.857143	2	Carbamidomethylation	33981.6	PDZ domain-containing protein GIPC3 OS=Homo sapiens OX=9606 GN=GIPC3 PE=1 SV=1
3920	TRUE	Q9UGH3|S23A2_HUMAN	121.368	2	2	5	11	8	6	9	18	2.2	0.75	2	Oxidation (M)	70337	Solute carrier family 23 member 2 OS=Homo sapiens OX=9606 GN=SLC23A2 PE=1 SV=1
5430	TRUE	P60059|SC61G_HUMAN	55.2081	1	1	5	7	4	3	4	8	1.4	0.75	2		7741.32	Protein transport protein Sec61 subunit gamma OS=Homo sapiens OX=9606 GN=SEC61G PE=1 SV=1
3345	TRUE	Q96A08|H2B1A_HUMAN	148.049	3	1	10	11	4	3	2	4	1.1	0.75	2		14167.5	Histone H2B type 1-A OS=Homo sapiens OX=9606 GN=H2BC1 PE=1 SV=3
3953	TRUE	Q9UGR2|Z3H7B_HUMAN	120.026	3	3	3	7	6	4	2	4	2.33333	0.666667	2		109858	Zinc finger CCCH domain-containing protein 7B OS=Homo sapiens OX=9606 GN=ZC3H7B PE=1 SV=2
3810	TRUE	O14966|RAB7L_HUMAN	126.565	3	3	21	17	15	9	7	14	0.809524	0.6	2	Carbamidomethylation; Oxidation (M)	23155.2	Ras-related protein Rab-7L1 OS=Homo sapiens OX=9606 GN=RAB29 PE=1 SV=1
3165	TRUE	P49815|TSC2_HUMAN	157.164	5	5	9	3	7	4	5	10	0.333333	0.571429	2		200608	Tuberin OS=Homo sapiens OX=9606 GN=TSC2 PE=1 SV=2
3634	TRUE	P51688|SPHM_HUMAN	134.223	4	4	11	11	9	5		2	1	0.555556	2		56695.4	N-sulphoglucosamine sulphohydrolase OS=Homo sapiens OX=9606 GN=SGSH PE=1 SV=1
4326	TRUE	Q7L592|NDUF7_HUMAN	102.152	2	2	5	13	2	1	2	4	2.6	0.5	2		49237.8	Protein arginine methyltransferase NDUFAF7, mitochondrial OS=Homo sapiens OX=9606 GN=NDUFAF7 PE=1 SV=1
5001	TRUE	P20962|PTMS_HUMAN	71.6129	2	2	6	9	2			2	1.5	0.5	2		11529.9	Parathymosin OS=Homo sapiens OX=9606 GN=PTMS PE=1 SV=2
4272	FALSE	O94900|TOX_HUMAN	77.3764	1	1	3	4	4	2	1	2	1.33333	0.5	2		57512.8	Thymocyte selection-associated high mobility group box protein TOX OS=Homo sapiens OX=9606 GN=TOX PE=1 SV=3
4272	TRUE	O94842|TOX4_HUMAN	105.73	2	2	3	4	4	2	2	4	1.33333	0.5	2		66194.8	TOX high mobility group box family member 4 OS=Homo sapiens OX=9606 GN=TOX4 PE=1 SV=1
4272	TRUE	O15405|TOX3_HUMAN	105.73	2	2	3	4	4	2	2	4	1.33333	0.5	2		63341.9	TOX high mobility group box family member 3 OS=Homo sapiens OX=9606 GN=TOX3 PE=1 SV=2
3048	TRUE	O95630|STABP_HUMAN	162.638	4	4	10	11	10	5	5	10	1.1	0.5	2	Carbamidomethylation	48076.9	STAM-binding protein OS=Homo sapiens OX=9606 GN=STAMBP PE=1 SV=1
5478	TRUE	Q9NW75|GPTC2_HUMAN	53.0955	1	1	1	1	2			2	1	0.5	2		58943.5	G patch domain-containing protein 2 OS=Homo sapiens OX=9606 GN=GPATCH2 PE=1 SV=1
5395	TRUE	Q9BTD8|RBM42_HUMAN	56.1768	1	1	6	5	2		1	2	0.833333	0.5	2		50414	RNA-binding protein 42 OS=Homo sapiens OX=9606 GN=RBM42 PE=1 SV=1
4318	TRUE	P22732|GTR5_HUMAN	102.644	2	2	13	10	9	4	3	6	0.769231	0.444444	2		54974	Solute carrier family 2, facilitated glucose transporter member 5 OS=Homo sapiens OX=9606 GN=SLC2A5 PE=1 SV=1
3369	TRUE	Q92574|TSC1_HUMAN	147.078	5	5	6	6	12	5	7	14	1	0.416667	2	Carbamidomethylation; Oxidation (M)	129767	Hamartin OS=Homo sapiens OX=9606 GN=TSC1 PE=1 SV=2
5256	TRUE	Q8WTV0|SCRB1_HUMAN	61.3799	1	1	2	2	3	1	1	2	1	0.333333	2		60877.9	Scavenger receptor class B member 1 OS=Homo sapiens OX=9606 GN=SCARB1 PE=1 SV=1
3677	TRUE	P69892|HBG2_HUMAN	132.099	3	2	4	4	15	5	2	4	1	0.333333	2		16126.4	Hemoglobin subunit gamma-2 OS=Homo sapiens OX=9606 GN=HBG2 PE=1 SV=2
3677	TRUE	P69891|HBG1_HUMAN	132.099	3	2	4	4	15	5	2	4	1	0.333333	2		16140.5	Hemoglobin subunit gamma-1 OS=Homo sapiens OX=9606 GN=HBG1 PE=1 SV=2
4788	TRUE	Q9NS18|GLRX2_HUMAN	80.953	1	1	5	4	3		4	8	0.8	0.333333	2		18051.7	Glutaredoxin-2, mitochondrial OS=Homo sapiens OX=9606 GN=GLRX2 PE=1 SV=1
5091	TRUE	Q8IYL3|CA174_HUMAN	68.1008	1	1	2	1	3		2	4	0.5	0.333333	2		25976.9	UPF0688 protein C1orf174 OS=Homo sapiens OX=9606 GN=C1orf174 PE=1 SV=2
4174	TRUE	Q96EE3|SEH1_HUMAN	110.247	2	2	6	7	5	1	1	2	1.16667	0.2	2		39648.6	Nucleoporin SEH1 OS=Homo sapiens OX=9606 GN=SEH1L PE=1 SV=3
2891	TRUE	Q12765|SCRN1_HUMAN	171.145	6	6	10	14	11		4	8	1.4	0.0909091	2	Carbamidomethylation	46382	Secernin-1 OS=Homo sapiens OX=9606 GN=SCRN1 PE=1 SV=2
4235	TRUE	Q2KHT3|CL16A_HUMAN	107.138	2	2	1	8			2	4	8		2		117715	Protein CLEC16A OS=Homo sapiens OX=9606 GN=CLEC16A PE=1 SV=2
4783	TRUE	P02747|C1QC_HUMAN	81.1851	1	1		8			4	8	8		2		25773.6	Complement C1q subcomponent subunit C OS=Homo sapiens OX=9606 GN=C1QC PE=1 SV=3
5333	TRUE	Q9NU19|TB22B_HUMAN	59.0148	2	1		2			1	2	2		2		59081.1	TBC1 domain family member 22B OS=Homo sapiens OX=9606 GN=TBC1D22B PE=1 SV=3
5041	TRUE	Q9UPR0|PLCL2_HUMAN	70.3495	1	1	1	2			1	2	2		2		125866	Inactive phospholipase C-like protein 2 OS=Homo sapiens OX=9606 GN=PLCL2 PE=1 SV=2
878	FALSE	Q14185|DOCK1_HUMAN	49.0642	1	1	2	4			1	2	2		2		215346	Dedicator of cytokinesis protein 1 OS=Homo sapiens OX=9606 GN=DOCK1 PE=1 SV=2
3898	TRUE	Q5VT66|MARC1_HUMAN	122.208	2	2	7	13				2	1.85714		2		37499.4	Mitochondrial amidoxime-reducing component 1 OS=Homo sapiens OX=9606 GN=MTARC1 PE=1 SV=1
5377	TRUE	Q9Y3U8|RL36_HUMAN	57.1241	1	1	2	3			2	4	1.5		2	Carbamidomethylation	12253.7	60S ribosomal protein L36 OS=Homo sapiens OX=9606 GN=RPL36 PE=1 SV=3
5739	TRUE	Q9NR33|DPOE4_HUMAN	40.0887	1	1		1				2	1		2		12208.8	DNA polymerase epsilon subunit 4 OS=Homo sapiens OX=9606 GN=POLE4 PE=1 SV=2
5779	TRUE	O43813|LANC1_HUMAN	37.8153	1	1		1				2	1		2		45283.1	Glutathione S-transferase LANCL1 OS=Homo sapiens OX=9606 GN=LANCL1 PE=1 SV=1
4767	TRUE	Q8IUH3|RBM45_HUMAN	81.8942	3	3	1	1				2	1		2	Carbamidomethylation	53502.5	RNA-binding protein 45 OS=Homo sapiens OX=9606 GN=RBM45 PE=1 SV=1
4732	TRUE	P52848|NDST1_HUMAN	83.5522	2	2	2	2				2	1		2		100868	Bifunctional heparan sulfate N-deacetylase/N-sulfotransferase 1 OS=Homo sapiens OX=9606 GN=NDST1 PE=1 SV=1
5268	TRUE	Q96QE2|MYCT_HUMAN	61.0854	1	1	2	2				2	1		2		70370.8	Proton myo-inositol cotransporter OS=Homo sapiens OX=9606 GN=SLC2A13 PE=1 SV=3
4603	TRUE	Q02556|IRF8_HUMAN	89.1139	2	2	1					2	1		2		48356.1	Interferon regulatory factor 8 OS=Homo sapiens OX=9606 GN=IRF8 PE=1 SV=2
5496	TRUE	Q16513|PKN2_HUMAN	51.9705	2	2	1					2	1		2		112035	Serine/threonine-protein kinase N2 OS=Homo sapiens OX=9606 GN=PKN2 PE=1 SV=1
5628	TRUE	Q86X27|RGPS2_HUMAN	45.6454	2	2	1					2	1		2		65167.1	Ras-specific guanine nucleotide-releasing factor RalGPS2 OS=Homo sapiens OX=9606 GN=RALGPS2 PE=1 SV=1
5766	TRUE	Q9P278|FNIP2_HUMAN	38.4715	1	1	1					2	1		2		122115	Folliculin-interacting protein 2 OS=Homo sapiens OX=9606 GN=FNIP2 PE=1 SV=2
5302	TRUE	Q9NV56|MRGBP_HUMAN	60.0481	1	1		1			1	2	1		2		22417.1	MRG/MORF4L-binding protein OS=Homo sapiens OX=9606 GN=MRGBP PE=1 SV=1
5423	TRUE	Q9GZT9|EGLN1_HUMAN	55.4637	1	1	1	1			2	4	1		2		46021	Egl nine homolog 1 OS=Homo sapiens OX=9606 GN=EGLN1 PE=1 SV=1
3791	TRUE	Q8TDY2|RBCC1_HUMAN	127.155	3	3	11	10				2	0.909091		2		183091	RB1-inducible coiled-coil protein 1 OS=Homo sapiens OX=9606 GN=RB1CC1 PE=1 SV=3
4250	TRUE	Q8IZA0|K319L_HUMAN	106.518	3	3	5	3			1	2	0.6		2		115658	Dyslexia-associated protein KIAA0319-like protein OS=Homo sapiens OX=9606 GN=KIAA0319L PE=1 SV=2
4273	TRUE	Q9ULX3|NOB1_HUMAN	105.525	3	3	4	2			4	8	0.5		2		46674.9	RNA-binding protein NOB1 OS=Homo sapiens OX=9606 GN=NOB1 PE=1 SV=1
5600	TRUE	Q86W50|MET16_HUMAN	46.9491	1	1	3	1				2	0.333333		2		63621	RNA N6-adenosine-methyltransferase METTL16 OS=Homo sapiens OX=9606 GN=METTL16 PE=1 SV=2
4416	TRUE	Q99986|VRK1_HUMAN	98.533	4	4	4	1			1	2	0.25		2		45476	Serine/threonine-protein kinase VRK1 OS=Homo sapiens OX=9606 GN=VRK1 PE=1 SV=1
4195	TRUE	O14531|DPYL4_HUMAN	109.209	4	1	6					2	0.166667		2	Oxidation (M)	61877.6	Dihydropyrimidinase-related protein 4 OS=Homo sapiens OX=9606 GN=DPYSL4 PE=1 SV=2
5123	TRUE	Q9Y5R8|TPPC1_HUMAN	66.9976	2	2						2			2	Carbamidomethylation	16831.6	Trafficking protein particle complex subunit 1 OS=Homo sapiens OX=9606 GN=TRAPPC1 PE=1 SV=1
5259	TRUE	E9PRG8|CK098_HUMAN	61.3595	1	1						2			2		14233.7	Uncharacterized protein C11orf98 OS=Homo sapiens OX=9606 GN=C11orf98 PE=4 SV=2
5279	TRUE	O95976|IGSF6_HUMAN	60.716	1	1						2			2		27012.8	Immunoglobulin superfamily member 6 OS=Homo sapiens OX=9606 GN=IGSF6 PE=2 SV=2
5284	TRUE	Q8WVB3|HEXD_HUMAN	60.6622	1	1						2			2		53789.7	Hexosaminidase D OS=Homo sapiens OX=9606 GN=HEXD PE=1 SV=3
5540	TRUE	O00458|IFRD1_HUMAN	49.9031	1	1						2			2		50268.6	Interferon-related developmental regulator 1 OS=Homo sapiens OX=9606 GN=IFRD1 PE=1 SV=4
5559	TRUE	Q9BTE7|DCNL5_HUMAN	48.5479	1	1						2			2		27508.4	DCN1-like protein 5 OS=Homo sapiens OX=9606 GN=DCUN1D5 PE=1 SV=1
5580	TRUE	P0DOX6|IGM_HUMAN	47.7612	1	1						2			2		63485.9	Immunoglobulin mu heavy chain OS=Homo sapiens OX=9606 PE=1 SV=2
5580	TRUE	P01871|IGHM_HUMAN	47.7612	1	1						2			2		49439.7	Immunoglobulin heavy constant mu OS=Homo sapiens OX=9606 GN=IGHM PE=1 SV=4
5672	TRUE	P30793|GCH1_HUMAN	43.311	1	1						2			2	Carbamidomethylation	27903.1	GTP cyclohydrolase 1 OS=Homo sapiens OX=9606 GN=GCH1 PE=1 SV=1
5693	TRUE	P06312|KV401_HUMAN	42.5057	1	1						2			2	Oxidation (M)	13380	Immunoglobulin kappa variable 4-1 OS=Homo sapiens OX=9606 GN=IGKV4-1 PE=1 SV=1
5710	TRUE	Q9H081|MIS12_HUMAN	41.826	1	1						2			2		24139.9	Protein MIS12 homolog OS=Homo sapiens OX=9606 GN=MIS12 PE=1 SV=1
5749	TRUE	Q9NWX6|THG1_HUMAN	39.4808	1	1						2			2		34830.8	Probable tRNA(His) guanylyltransferase OS=Homo sapiens OX=9606 GN=THG1L PE=1 SV=2
5752	TRUE	Q969G6|RIFK_HUMAN	39.3336	1	1						2			2	Oxidation (M)	17623.2	Riboflavin kinase OS=Homo sapiens OX=9606 GN=RFK PE=1 SV=2
5769	TRUE	Q9Y5V0|ZN706_HUMAN	38.4128	1	1						2			2	Carbamidomethylation	8497.82	Zinc finger protein 706 OS=Homo sapiens OX=9606 GN=ZNF706 PE=1 SV=1
5772	TRUE	Q8N300|SVBP_HUMAN	38.0954	1	1						2			2	Carbamidomethylation	7807.91	Small vasohibin-binding protein OS=Homo sapiens OX=9606 GN=SVBP PE=1 SV=1
5800	TRUE	Q9H477|RBSK_HUMAN	36.7595	1	1						2			2		34143	Ribokinase OS=Homo sapiens OX=9606 GN=RBKS PE=1 SV=1
5821	TRUE	O94777|DPM2_HUMAN	35.8005	1	1						2			2		9312.33	Dolichol phosphate-mannose biosynthesis regulatory protein OS=Homo sapiens OX=9606 GN=DPM2 PE=1 SV=3
5869	TRUE	Q86SZ2|TPC6B_HUMAN	33.7316	1	1						2			2	Oxidation (M); Carbamidomethylation	17983	Trafficking protein particle complex subunit 6B OS=Homo sapiens OX=9606 GN=TRAPPC6B PE=1 SV=1
5882	TRUE	Q9H5I5|PIEZ2_HUMAN	33.0202	1	1						2			2		318064	Piezo-type mechanosensitive ion channel component 2 OS=Homo sapiens OX=9606 GN=PIEZO2 PE=1 SV=2
4272	FALSE	Q96NM4|TOX2_HUMAN	56.7069	1	1					1	2			2		51604.3	TOX high mobility group box family member 2 OS=Homo sapiens OX=9606 GN=TOX2 PE=1 SV=2
4895	TRUE	Q6P1Q9|MET2B_HUMAN	76.0676	2	2					1	2			2	Carbamidomethylation	43426.1	tRNA N(3)-methylcytidine methyltransferase METTL2B OS=Homo sapiens OX=9606 GN=METTL2B PE=1 SV=3
4900	TRUE	O95749|GGPPS_HUMAN	75.8944	2	2					1	2			2		34870.9	Geranylgeranyl pyrophosphate synthase OS=Homo sapiens OX=9606 GN=GGPS1 PE=1 SV=1
5129	TRUE	Q7Z7A4|PXK_HUMAN	66.7348	1	1					1	2			2		64950.1	PX domain-containing protein kinase-like protein OS=Homo sapiens OX=9606 GN=PXK PE=1 SV=1
5155	TRUE	Q06587|RING1_HUMAN	65.882	1	1					1	2			2		42429.3	E3 ubiquitin-protein ligase RING1 OS=Homo sapiens OX=9606 GN=RING1 PE=1 SV=2
5287	TRUE	Q8IUR0|TPPC5_HUMAN	60.5258	1	1					1	2			2		20783	Trafficking protein particle complex subunit 5 OS=Homo sapiens OX=9606 GN=TRAPPC5 PE=1 SV=1
5381	TRUE	Q96AA3|RFT1_HUMAN	57.0123	1	1					1	2			2		60335.3	Protein RFT1 homolog OS=Homo sapiens OX=9606 GN=RFT1 PE=1 SV=1
5512	TRUE	O94880|PHF14_HUMAN	51.171	1	1					1	2			2		100053	PHD finger protein 14 OS=Homo sapiens OX=9606 GN=PHF14 PE=1 SV=2
5709	TRUE	Q9H0X9|OSBL5_HUMAN	41.8279	1	1					1	2			2		98616.5	Oxysterol-binding protein-related protein 5 OS=Homo sapiens OX=9606 GN=OSBPL5 PE=1 SV=1
5385	TRUE	Q9Y530|OARD1_HUMAN	56.4926	1	1					2	4			2		17024.7	ADP-ribose glycohydrolase OARD1 OS=Homo sapiens OX=9606 GN=OARD1 PE=1 SV=2
5140	TRUE	Q9GZQ3|COMD5_HUMAN	66.2369	2	2					3	6			2		24670.4	COMM domain-containing protein 5 OS=Homo sapiens OX=9606 GN=COMMD5 PE=1 SV=1
1205	TRUE	Q9NUV9|GIMA4_HUMAN	262.2	10	10	14	44	22	51	30	59	3.14286	2.31818	1.96667	Carbamidomethylation; Oxidation (M)	37533.8	GTPase IMAP family member 4 OS=Homo sapiens OX=9606 GN=GIMAP4 PE=1 SV=1
1774	TRUE	P40306|PSB10_HUMAN	227.272	8	8	57	57	55	87	53	103	1	1.58182	1.9434	Carbamidomethylation; Oxidation (M)	28936.3	Proteasome subunit beta type-10 OS=Homo sapiens OX=9606 GN=PSMB10 PE=1 SV=1
297	TRUE	P00352|AL1A1_HUMAN	358.628	24	23	109	162	123	179	88	171	1.48624	1.45528	1.94318	Oxidation (M); Carbamidomethylation	54861.8	Retinal dehydrogenase 1 OS=Homo sapiens OX=9606 GN=ALDH1A1 PE=1 SV=2
451	TRUE	O15117|FYB1_HUMAN	334.736	21	21	43	82	63	65	52	101	1.90698	1.03175	1.94231	Oxidation (M); Carbamidomethylation	85387.1	FYN-binding protein 1 OS=Homo sapiens OX=9606 GN=FYB1 PE=1 SV=2
299	TRUE	Q03518|TAP1_HUMAN	358.346	18	17	64	94	51	139	65	126	1.46875	2.72549	1.93846	Carbamidomethylation; Oxidation (M)	87217.7	Antigen peptide transporter 1 OS=Homo sapiens OX=9606 GN=TAP1 PE=1 SV=2
625	TRUE	P20701|ITAL_HUMAN	313.467	17	17	77	84	54	93	46	89	1.09091	1.72222	1.93478	Oxidation (M); Carbamidomethylation	128770	Integrin alpha-L OS=Homo sapiens OX=9606 GN=ITGAL PE=1 SV=3
1234	TRUE	Q8IXQ6|PARP9_HUMAN	259.822	12	12	28	36	14	33	26	50	1.28571	2.35714	1.92308	Carbamidomethylation; Oxidation (M)	96343.2	Protein mono-ADP-ribosyltransferase PARP9 OS=Homo sapiens OX=9606 GN=PARP9 PE=1 SV=2
3001	TRUE	Q6PL24|TMED8_HUMAN	165.321	7	7	15	9	12	24	13	25	0.6	2	1.92308	Carbamidomethylation; Oxidation (M)	35740.5	Protein TMED8 OS=Homo sapiens OX=9606 GN=TMED8 PE=1 SV=1
2545	TRUE	O00178|GTPB1_HUMAN	187.521	6	6	15	18	7	12	13	25	1.2	1.71429	1.92308	Oxidation (M); Carbamidomethylation	72453.8	GTP-binding protein 1 OS=Homo sapiens OX=9606 GN=GTPBP1 PE=1 SV=3
3703	TRUE	P62910|RL32_HUMAN	131.165	2	2	16	16	16	18	13	25	1	1.125	1.92308	Oxidation (M); Carbamidomethylation	15859.8	60S ribosomal protein L32 OS=Homo sapiens OX=9606 GN=RPL32 PE=1 SV=2
2305	TRUE	O95758|PTBP3_HUMAN	199.501	9	8	13	21	27	20	13	25	1.61538	0.740741	1.92308	Carbamidomethylation	59689.5	Polypyrimidine tract-binding protein 3 OS=Homo sapiens OX=9606 GN=PTBP3 PE=1 SV=2
2717	TRUE	P54105|ICLN_HUMAN	179.989	5	5	13	7	11	14	11	21	0.538462	1.27273	1.90909	Oxidation (M)	26215.3	Methylosome subunit pICln OS=Homo sapiens OX=9606 GN=CLNS1A PE=1 SV=1
2045	TRUE	P22897|MRC1_HUMAN	212.871	11	11	11	17	13	20	21	40	1.54545	1.53846	1.90476	Oxidation (M)	166012	Macrophage mannose receptor 1 OS=Homo sapiens OX=9606 GN=MRC1 PE=1 SV=1
3065	TRUE	O75427|LRCH4_HUMAN	161.821	6	6	3	13	6	8	10	19	4.33333	1.33333	1.9	Carbamidomethylation	73450.3	Leucine-rich repeat and calponin homology domain-containing protein 4 OS=Homo sapiens OX=9606 GN=LRCH4 PE=1 SV=2
1301	TRUE	Q96RU3|FNBP1_HUMAN	255.547	13	13	43	62	40	41	37	70	1.44186	1.025	1.89189	Carbamidomethylation; Oxidation (M)	71306.8	Formin-binding protein 1 OS=Homo sapiens OX=9606 GN=FNBP1 PE=1 SV=2
4026	TRUE	Q9H832|UBE2Z_HUMAN	116.798	3	3	2	6	8	13	9	17	3	1.625	1.88889	Oxidation (M); Carbamidomethylation	38210.2	Ubiquitin-conjugating enzyme E2 Z OS=Homo sapiens OX=9606 GN=UBE2Z PE=1 SV=2
2243	TRUE	Q6ZUM4|RHG27_HUMAN	202.572	6	6	12	14	10	6	9	17	1.16667	0.6	1.88889		98396	Rho GTPase-activating protein 27 OS=Homo sapiens OX=9606 GN=ARHGAP27 PE=1 SV=3
3095	TRUE	Q9BXW7|HDHD5_HUMAN	160.448	5	5	14	22		20	8	15	1.57143	20	1.875	Carbamidomethylation; Oxidation (M)	46321.5	Haloacid dehalogenase-like hydrolase domain-containing 5 OS=Homo sapiens OX=9606 GN=HDHD5 PE=1 SV=1
3220	TRUE	Q01628|IFM3_HUMAN	154.509	2	2	14	12		5	8	15	0.857143	5	1.875	Oxidation (M)	14632.1	Interferon-induced transmembrane protein 3 OS=Homo sapiens OX=9606 GN=IFITM3 PE=1 SV=2
2441	TRUE	Q04323|UBXN1_HUMAN	193.13	6	6	18	10	13	18	8	15	0.555556	1.38462	1.875		33325.3	UBX domain-containing protein 1 OS=Homo sapiens OX=9606 GN=UBXN1 PE=1 SV=2
4523	TRUE	Q9Y2R0|COA3_HUMAN	92.6308	3	3	5	5	9	9	8	15	1	1	1.875	Oxidation (M)	11731.3	Cytochrome c oxidase assembly factor 3 homolog, mitochondrial OS=Homo sapiens OX=9606 GN=COA3 PE=1 SV=1
3212	TRUE	O43318|M3K7_HUMAN	154.981	5	5	12	3	1	1	8	15	0.25	1	1.875	Carbamidomethylation; Oxidation (M)	67196.1	Mitogen-activated protein kinase kinase kinase 7 OS=Homo sapiens OX=9606 GN=MAP3K7 PE=1 SV=1
3145	TRUE	O95379|TFIP8_HUMAN	158.116	5	5	17	18	13	12	16	30	1.05882	0.923077	1.875	Oxidation (M); Carbamidomethylation	23003.4	Tumor necrosis factor alpha-induced protein 8 OS=Homo sapiens OX=9606 GN=TNFAIP8 PE=1 SV=1
1543	TRUE	Q00653|NFKB2_HUMAN	239.775	11	11	15	28	9	23	15	28	1.86667	2.55556	1.86667	Carbamidomethylation	96749.2	Nuclear factor NF-kappa-B p100 subunit OS=Homo sapiens OX=9606 GN=NFKB2 PE=1 SV=4
3440	TRUE	O15541|R113A_HUMAN	142.88	4	4		19		6	7	13	19	6	1.85714	Carbamidomethylation; Oxidation (M)	38787.2	E3 ubiquitin-protein ligase RNF113A OS=Homo sapiens OX=9606 GN=RNF113A PE=1 SV=1
2646	TRUE	O14972|VP26C_HUMAN	183.253	4	4	9	9	13	16	14	26	1	1.23077	1.85714	Carbamidomethylation	33010.4	Vacuolar protein sorting-associated protein 26C OS=Homo sapiens OX=9606 GN=VPS26C PE=1 SV=1
1037	TRUE	P35527|K1C9_HUMAN	274.527	16	16	69	57	21	6	20	37	0.826087	0.285714	1.85	Oxidation (M)	62064.3	Keratin, type I cytoskeletal 9 OS=Homo sapiens OX=9606 GN=KRT9 PE=1 SV=3
1175	FALSE	Q14409|GLPK3_HUMAN	248.888	10	10	18	40	13	40	33	61	2.22222	3.07692	1.84848	Carbamidomethylation; Oxidation (M)	60597.9	Glycerol kinase 3 OS=Homo sapiens OX=9606 GN=GK3P PE=2 SV=2
1907	TRUE	O75113|N4BP1_HUMAN	219.918	8	8	17	14	8	16	19	35	0.823529	2	1.84211	Carbamidomethylation	100379	NEDD4-binding protein 1 OS=Homo sapiens OX=9606 GN=N4BP1 PE=1 SV=4
870	TRUE	P29590|PML_HUMAN	288.504	18	18	25	64	21	76	43	79	2.56	3.61905	1.83721	Oxidation (M); Carbamidomethylation	97550.6	Protein PML OS=Homo sapiens OX=9606 GN=PML PE=1 SV=3
4194	TRUE	Q96G91|P2Y11_HUMAN	109.248	2	2	7	6		4	6	11	0.857143	4	1.83333	Carbamidomethylation	40345.3	P2Y purinoceptor 11 OS=Homo sapiens OX=9606 GN=P2RY11 PE=2 SV=2
653	TRUE	Q16666|IF16_HUMAN	310.23	20	20	118	132	35	89	90	165	1.11864	2.54286	1.83333	Oxidation (M); Carbamidomethylation	88255.6	Gamma-interferon-inducible protein 16 OS=Homo sapiens OX=9606 GN=IFI16 PE=1 SV=3
1929	TRUE	P48163|MAOX_HUMAN	219.039	9	9	3	12	9	21	6	11	4	2.33333	1.83333	Oxidation (M); Carbamidomethylation	64149.6	NADP-dependent malic enzyme OS=Homo sapiens OX=9606 GN=ME1 PE=1 SV=1
3498	TRUE	C9JLW8|MCRI1_HUMAN	140.685	2	2	3	12	5	11	18	33	4	2.2	1.83333		10920.2	Mapk-regulated corepressor-interacting protein 1 OS=Homo sapiens OX=9606 GN=MCRIP1 PE=1 SV=1
5097	TRUE	Q12982|BNIP2_HUMAN	67.9561	1	1	3	3	2	3	6	11	1	1.5	1.83333		36017.8	BCL2/adenovirus E1B 19 kDa protein-interacting protein 2 OS=Homo sapiens OX=9606 GN=BNIP2 PE=1 SV=1
2451	TRUE	P30047|GFRP_HUMAN	192.591	4	4	14	21	12	15	6	11	1.5	1.25	1.83333	Oxidation (M)	9698.2	GTP cyclohydrolase 1 feedback regulatory protein OS=Homo sapiens OX=9606 GN=GCHFR PE=1 SV=3
3473	TRUE	P53384|NUBP1_HUMAN	141.641	4	4	2	3	6	7	6	11	1.5	1.16667	1.83333	Carbamidomethylation	34534.5	Cytosolic Fe-S cluster assembly factor NUBP1 OS=Homo sapiens OX=9606 GN=NUBP1 PE=1 SV=2
2738	TRUE	Q96Q15|SMG1_HUMAN	179.106	7	7		8	1		6	11	8	1	1.83333		410501	Serine/threonine-protein kinase SMG1 OS=Homo sapiens OX=9606 GN=SMG1 PE=1 SV=3
4310	TRUE	Q86T03|PP4P1_HUMAN	103.461	3	3	10	12	3	3	6	11	1.2	1	1.83333	Carbamidomethylation	29469.6	Type 1 phosphatidylinositol 4,5-bisphosphate 4-phosphatase OS=Homo sapiens OX=9606 GN=PIP4P1 PE=1 SV=1
3824	TRUE	O75907|DGAT1_HUMAN	125.85	2	2	2	1	3	3	6	11	0.5	1	1.83333		55278.3	Diacylglycerol O-acyltransferase 1 OS=Homo sapiens OX=9606 GN=DGAT1 PE=1 SV=2
3302	TRUE	P35244|RFA3_HUMAN	149.83	4	4	14	9			6	11	0.642857		1.83333	Carbamidomethylation	13568.7	Replication protein A 14 kDa subunit OS=Homo sapiens OX=9606 GN=RPA3 PE=1 SV=1
1251	TRUE	Q9HB40|RISC_HUMAN	258.775	12	12	102	138	49	125	129	236	1.35294	2.55102	1.82946	Oxidation (M)	50830.7	Retinoid-inducible serine carboxypeptidase OS=Homo sapiens OX=9606 GN=SCPEP1 PE=1 SV=1
1993	TRUE	Q9NUQ8|ABCF3_HUMAN	215.62	8	8	7	17	33	30	17	31	2.42857	0.909091	1.82353		79744.7	ATP-binding cassette sub-family F member 3 OS=Homo sapiens OX=9606 GN=ABCF3 PE=1 SV=2
2953	TRUE	Q13075|BIRC1_HUMAN	167.178	6	6	14	14	8	10	11	20	1	1.25	1.81818		159582	Baculoviral IAP repeat-containing protein 1 OS=Homo sapiens OX=9606 GN=NAIP PE=1 SV=3
1423	TRUE	P53004|BIEA_HUMAN	247.609	8	8	54	44	44	56	26	47	0.814815	1.27273	1.80769	Oxidation (M)	33428.5	Biliverdin reductase A OS=Homo sapiens OX=9606 GN=BLVRA PE=1 SV=2
4099	TRUE	P61964|WDR5_HUMAN	113.843	3	3	10	5	4	6	5	9	0.5	1.5	1.8		36588.5	WD repeat-containing protein 5 OS=Homo sapiens OX=9606 GN=WDR5 PE=1 SV=1
3892	TRUE	Q5HYI8|RABL3_HUMAN	122.37	2	2	4	5	3	4	5	9	1.25	1.33333	1.8	Carbamidomethylation	26422.8	Rab-like protein 3 OS=Homo sapiens OX=9606 GN=RABL3 PE=1 SV=1
3596	TRUE	P25686|DNJB2_HUMAN	136.311	5	5	11	5	23	26	5	9	0.454545	1.13043	1.8		35580.1	DnaJ homolog subfamily B member 2 OS=Homo sapiens OX=9606 GN=DNAJB2 PE=1 SV=3
3672	TRUE	Q6DKI1|RL7L_HUMAN	132.369	4	4	7	7	11	10	5	9	1	0.909091	1.8	Carbamidomethylation	29669.2	60S ribosomal protein L7-like 1 OS=Homo sapiens OX=9606 GN=RPL7L1 PE=1 SV=2
2612	TRUE	O14920|IKKB_HUMAN	184.566	6	6	27	25	35	13	30	54	0.925926	0.371429	1.8	Oxidation (M)	86563.9	Inhibitor of nuclear factor kappa-B kinase subunit beta OS=Homo sapiens OX=9606 GN=IKBKB PE=1 SV=1
1304	FALSE	Q5JXB2|UE2NL_HUMAN	131.111	3	3	17	13			5	9	0.764706		1.8		17377	Putative ubiquitin-conjugating enzyme E2 N-like OS=Homo sapiens OX=9606 GN=UBE2NL PE=1 SV=1
1536	TRUE	Q14005|IL16_HUMAN	240.092	12	12	21	31	13	29	19	34	1.47619	2.23077	1.78947	Oxidation (M)	141752	Pro-interleukin-16 OS=Homo sapiens OX=9606 GN=IL16 PE=1 SV=4
2341	TRUE	Q9NXN4|GDAP2_HUMAN	197.857	6	6	21	19	18	21	19	34	0.904762	1.16667	1.78947	Oxidation (M)	56224.7	Ganglioside-induced differentiation-associated protein 2 OS=Homo sapiens OX=9606 GN=GDAP2 PE=1 SV=1
5900	TRUE	Q8IX07|FOG1_HUMAN	32.2304	1	1	3	3	4	5	9	16	1	1.25	1.77778		104888	Zinc finger protein ZFPM1 OS=Homo sapiens OX=9606 GN=ZFPM1 PE=1 SV=2
3574	TRUE	Q96K37|S35E1_HUMAN	137.203	3	3	15	12	9	8	9	16	0.8	0.888889	1.77778		44772.5	Solute carrier family 35 member E1 OS=Homo sapiens OX=9606 GN=SLC35E1 PE=1 SV=2
4275	TRUE	Q9H7B2|RPF2_HUMAN	105.502	2	2	6	7	6	4	9	16	1.16667	0.666667	1.77778		35582.9	Ribosome production factor 2 homolog OS=Homo sapiens OX=9606 GN=RPF2 PE=1 SV=2
4678	TRUE	P07305|H10_HUMAN	85.9591	1	1	6	16	14	8	9	16	2.66667	0.571429	1.77778	Oxidation (M)	20862.9	Histone H1.0 OS=Homo sapiens OX=9606 GN=H1-0 PE=1 SV=3
1192	TRUE	P52630|STAT2_HUMAN	263.135	15	15	30	41	27	64	49	87	1.36667	2.37037	1.77551	Carbamidomethylation	97916.2	Signal transducer and activator of transcription 2 OS=Homo sapiens OX=9606 GN=STAT2 PE=1 SV=1
3344	TRUE	A6NDU8|CE051_HUMAN	148.054	3	3	20	23	15	21	13	23	1.15	1.4	1.76923		33620.4	UPF0600 protein C5orf51 OS=Homo sapiens OX=9606 GN=C5orf51 PE=1 SV=1
1858	TRUE	P51116|FXR2_HUMAN	222.597	6	6	23	26	15	29	30	53	1.13043	1.93333	1.76667		74223.3	Fragile X mental retardation syndrome-related protein 2 OS=Homo sapiens OX=9606 GN=FXR2 PE=1 SV=2
3586	TRUE	Q8WUD4|CCD12_HUMAN	136.67	5	5	5	4	7	12	4	7	0.8	1.71429	1.75		19180.7	Coiled-coil domain-containing protein 12 OS=Homo sapiens OX=9606 GN=CCDC12 PE=1 SV=1
2557	TRUE	Q8WTW3|COG1_HUMAN	186.917	7	7	17	14	6	10	12	21	0.823529	1.66667	1.75		108978	Conserved oligomeric Golgi complex subunit 1 OS=Homo sapiens OX=9606 GN=COG1 PE=1 SV=1
425	TRUE	P07948|LYN_HUMAN	337.54	23	20	75	93	80	127	80	140	1.24	1.5875	1.75	Carbamidomethylation; Oxidation (M)	58574.1	Tyrosine-protein kinase Lyn OS=Homo sapiens OX=9606 GN=LYN PE=1 SV=3
4547	TRUE	O15111|IKKA_HUMAN	91.7639	2	2	1		4	6	4	7	1	1.5	1.75	Carbamidomethylation	84639.6	Inhibitor of nuclear factor kappa-B kinase subunit alpha OS=Homo sapiens OX=9606 GN=CHUK PE=1 SV=2
5088	TRUE	Q96EU7|C1GLC_HUMAN	68.2139	1	1	5	4	1	1	4	7	0.8	1	1.75		36382	C1GALT1-specific chaperone 1 OS=Homo sapiens OX=9606 GN=C1GALT1C1 PE=1 SV=1
2747	TRUE	Q6P9B6|MEAK7_HUMAN	178.688	5	5	22	13	7	7	4	7	0.590909	1	1.75	Oxidation (M); Carbamidomethylation	50993.6	MTOR-associated protein MEAK7 OS=Homo sapiens OX=9606 GN=MEAK7 PE=1 SV=2
4164	TRUE	Q9BZD2|S29A3_HUMAN	110.545	2	2	10	8	14	12	4	7	0.8	0.857143	1.75		51814.6	Equilibrative nucleoside transporter 3 OS=Homo sapiens OX=9606 GN=SLC29A3 PE=1 SV=3
4088	TRUE	Q8TEA8|DTD1_HUMAN	114.378	2	2	11	17	4	3	4	7	1.54545	0.75	1.75		23423.5	D-aminoacyl-tRNA deacylase 1 OS=Homo sapiens OX=9606 GN=DTD1 PE=1 SV=2
2414	TRUE	Q9UPY8|MARE3_HUMAN	194.378	7	4	26	16	17	10	8	14	0.615385	0.588235	1.75		31982.2	Microtubule-associated protein RP/EB family member 3 OS=Homo sapiens OX=9606 GN=MAPRE3 PE=1 SV=1
4052	TRUE	Q9NXC5|MIO_HUMAN	116.008	3	3	2	4	7	4	4	7	2	0.571429	1.75		98584.4	GATOR complex protein MIOS OS=Homo sapiens OX=9606 GN=MIOS PE=1 SV=2
4624	TRUE	Q9NRW3|ABC3C_HUMAN	88.1304	2	2	4	4	7	4	4	7	1	0.571429	1.75	Oxidation (M)	22825.9	DNA dC->dU-editing enzyme APOBEC-3C OS=Homo sapiens OX=9606 GN=APOBEC3C PE=1 SV=2
4770	TRUE	Q9NRZ7|PLCC_HUMAN	81.8543	2	2	2	6	4	2	4	7	3	0.5	1.75		43381	1-acyl-sn-glycerol-3-phosphate acyltransferase gamma OS=Homo sapiens OX=9606 GN=AGPAT3 PE=1 SV=1
3923	TRUE	P82932|RT06_HUMAN	121.322	3	3	2	4	8	4	4	7	2	0.5	1.75	Carbamidomethylation; Oxidation (M)	14226.6	28S ribosomal protein S6, mitochondrial OS=Homo sapiens OX=9606 GN=MRPS6 PE=1 SV=3
4866	TRUE	Q06136|KDSR_HUMAN	77.3935	1	1	6	7	17	8	4	7	1.16667	0.470588	1.75	Carbamidomethylation	36187.1	3-ketodihydrosphingosine reductase OS=Homo sapiens OX=9606 GN=KDSR PE=1 SV=1
3771	TRUE	Q96SQ9|CP2S1_HUMAN	127.898	3	3	10	8	3		8	14	0.8	0.333333	1.75	Oxidation (M)	55816.7	Cytochrome P450 2S1 OS=Homo sapiens OX=9606 GN=CYP2S1 PE=1 SV=2
4238	TRUE	O14492|SH2B2_HUMAN	107.002	3	3	4	3	3		4	7	0.75	0.333333	1.75		67737.8	SH2B adapter protein 2 OS=Homo sapiens OX=9606 GN=SH2B2 PE=1 SV=2
2882	TRUE	O95376|ARI2_HUMAN	171.583	5	5	4	2	5	1	4	7	0.5	0.2	1.75	Carbamidomethylation	57818.9	E3 ubiquitin-protein ligase ARIH2 OS=Homo sapiens OX=9606 GN=ARIH2 PE=1 SV=1
3370	TRUE	Q16831|UPP1_HUMAN	146.709	4	4	6	17	10		4	7	2.83333	0.1	1.75	Carbamidomethylation	33934.3	Uridine phosphorylase 1 OS=Homo sapiens OX=9606 GN=UPP1 PE=1 SV=1
4962	TRUE	Q86UT6|NLRX1_HUMAN	73.2687	2	2	1	1			4	7	1		1.75		107616	NLR family member X1 OS=Homo sapiens OX=9606 GN=NLRX1 PE=1 SV=1
2160	TRUE	P08571|CD14_HUMAN	206.601	6	6	36	46	39	29	23	40	1.27778	0.74359	1.73913	Oxidation (M); Carbamidomethylation	40076.2	Monocyte differentiation antigen CD14 OS=Homo sapiens OX=9606 GN=CD14 PE=1 SV=2
697	TRUE	P20592|MX2_HUMAN	304.723	19	17	73	91	25	80	71	123	1.24658	3.2	1.73239	Oxidation (M)	82088.7	Interferon-induced GTP-binding protein Mx2 OS=Homo sapiens OX=9606 GN=MX2 PE=1 SV=1
2195	TRUE	Q8TD19|NEK9_HUMAN	205.276	6	6	17	17	9	15	11	19	1	1.66667	1.72727		107168	Serine/threonine-protein kinase Nek9 OS=Homo sapiens OX=9606 GN=NEK9 PE=1 SV=2
1086	TRUE	Q14289|FAK2_HUMAN	271.061	18	18	40	31	35	41	44	76	0.775	1.17143	1.72727	Carbamidomethylation; Oxidation (M)	115875	Protein-tyrosine kinase 2-beta OS=Homo sapiens OX=9606 GN=PTK2B PE=1 SV=2
3173	TRUE	O00422|SAP18_HUMAN	157.068	4	4	23	16	14	13	22	38	0.695652	0.928571	1.72727	Oxidation (M)	17561.1	Histone deacetylase complex subunit SAP18 OS=Homo sapiens OX=9606 GN=SAP18 PE=1 SV=1
2167	TRUE	Q9NZD8|SPG21_HUMAN	206.26	7	7	24	22	17	31	14	24	0.916667	1.82353	1.71429	Oxidation (M); Carbamidomethylation	34960.1	Maspardin OS=Homo sapiens OX=9606 GN=SPG21 PE=1 SV=1
3015	TRUE	P17693|HLAG_HUMAN	164.382	4	1	27	30	27	42	14	24	1.11111	1.55556	1.71429	Carbamidomethylation	38224.1	HLA class I histocompatibility antigen, alpha chain G OS=Homo sapiens OX=9606 GN=HLA-G PE=1 SV=1
3360	TRUE	P56182|RRP1_HUMAN	147.488	4	4	10	19	13	12	7	12	1.9	0.923077	1.71429		52839.2	Ribosomal RNA processing protein 1 homolog A OS=Homo sapiens OX=9606 GN=RRP1 PE=1 SV=1
1586	TRUE	Q9BQE5|APOL2_HUMAN	237.414	10	10	43	56	28	55	31	53	1.30233	1.96429	1.70968	Oxidation (M)	37092.3	Apolipoprotein L2 OS=Homo sapiens OX=9606 GN=APOL2 PE=1 SV=1
655	TRUE	Q03519|TAP2_HUMAN	309.915	15	14	49	64	51	141	61	104	1.30612	2.76471	1.70492	Oxidation (M); Carbamidomethylation	75663.8	Antigen peptide transporter 2 OS=Homo sapiens OX=9606 GN=TAP2 PE=1 SV=1
1469	TRUE	Q9NWQ8|PHAG1_HUMAN	245	10	10	27	26	19	28	20	34	0.962963	1.47368	1.7	Carbamidomethylation; Oxidation (M)	46980.6	Phosphoprotein associated with glycosphingolipid-enriched microdomains 1 OS=Homo sapiens OX=9606 GN=PAG1 PE=1 SV=2
3416	TRUE	O00115|DNS2A_HUMAN	144.414	3	3	18	17	9	7	10	17	0.944444	0.777778	1.7	Carbamidomethylation	39580.8	Deoxyribonuclease-2-alpha OS=Homo sapiens OX=9606 GN=DNASE2 PE=1 SV=2
2483	TRUE	Q96J02|ITCH_HUMAN	191.217	8	8	18	14	14	9	20	34	0.777778	0.642857	1.7		102803	E3 ubiquitin-protein ligase Itchy homolog OS=Homo sapiens OX=9606 GN=ITCH PE=1 SV=2
2228	TRUE	Q9UKJ1|PILRA_HUMAN	203.398	6	6	10	13	15	16	13	22	1.3	1.06667	1.69231	Oxidation (M)	34004.7	Paired immunoglobulin-like type 2 receptor alpha OS=Homo sapiens OX=9606 GN=PILRA PE=1 SV=3
2694	TRUE	O15270|SPTC2_HUMAN	181.145	6	6	20	16	15	17	16	27	0.8	1.13333	1.6875	Carbamidomethylation	62924.3	Serine palmitoyltransferase 2 OS=Homo sapiens OX=9606 GN=SPTLC2 PE=1 SV=1
2062	TRUE	Q9H0P0|5NT3A_HUMAN	212.057	11	11	13	16	14	31	19	32	1.23077	2.21429	1.68421	Oxidation (M)	37948.1	Cytosolic 5'-nucleotidase 3A OS=Homo sapiens OX=9606 GN=NT5C3A PE=1 SV=3
316	TRUE	Q460N5|PAR14_HUMAN	356.437	41	41	96	136	48	141	88	148	1.41667	2.9375	1.68182	Carbamidomethylation; Oxidation (M)	202800	Protein mono-ADP-ribosyltransferase PARP14 OS=Homo sapiens OX=9606 GN=PARP14 PE=1 SV=3
4125	TRUE	L0R6Q1|S35U4_HUMAN	112.854	2	2	19	15		10	6	10	0.789474	10	1.66667		11132.8	SLC35A4 upstream open reading frame protein OS=Homo sapiens OX=9606 GN=SLC35A4 PE=3 SV=1
4433	TRUE	Q5JU69|TOR2A_HUMAN	97.735	2	1	5	5		9	6	10	1	9	1.66667		35714.3	Torsin-2A OS=Homo sapiens OX=9606 GN=TOR2A PE=2 SV=1
5100	TRUE	Q9BRT6|LLPH_HUMAN	67.6808	1	1				9	3	5		9	1.66667		15225.2	Protein LLP homolog OS=Homo sapiens OX=9606 GN=LLPH PE=1 SV=1
2245	TRUE	Q9ULA0|DNPEP_HUMAN	202.542	9	9	25	28	16	32	30	50	1.12	2	1.66667	Carbamidomethylation; Oxidation (M)	53410.4	Aspartyl aminopeptidase OS=Homo sapiens OX=9606 GN=DNPEP PE=1 SV=2
1689	TRUE	O43175|SERA_HUMAN	231.697	11	11	45	40	10	20	9	15	0.888889	2	1.66667	Carbamidomethylation	56650.5	D-3-phosphoglycerate dehydrogenase OS=Homo sapiens OX=9606 GN=PHGDH PE=1 SV=4
3609	TRUE	Q8TB36|GDAP1_HUMAN	135.506	4	4	19	13	3	6	3	5	0.684211	2	1.66667		41345.7	Ganglioside-induced differentiation-associated protein 1 OS=Homo sapiens OX=9606 GN=GDAP1 PE=1 SV=3
4700	TRUE	Q6PJG6|BRAT1_HUMAN	85.0323	3	3	8		1	2	3	5	0.125	2	1.66667		88119.1	BRCA1-associated ATM activator 1 OS=Homo sapiens OX=9606 GN=BRAT1 PE=1 SV=2
1371	TRUE	P15498|VAV_HUMAN	251.394	17	16	27	34	22	31	18	30	1.25926	1.40909	1.66667	Carbamidomethylation; Oxidation (M)	98314.2	Proto-oncogene vav OS=Homo sapiens OX=9606 GN=VAV1 PE=1 SV=4
1799	TRUE	P10619|PPGB_HUMAN	225.358	7	7	24	23	30	41	9	15	0.958333	1.36667	1.66667	Carbamidomethylation	54466.1	Lysosomal protective protein OS=Homo sapiens OX=9606 GN=CTSA PE=1 SV=2
2205	TRUE	Q96RF0|SNX18_HUMAN	204.755	6	6	10	15	9	12	15	25	1.5	1.33333	1.66667		68894.4	Sorting nexin-18 OS=Homo sapiens OX=9606 GN=SNX18 PE=1 SV=2
3790	TRUE	Q9UHY8|FEZ2_HUMAN	127.206	3	3	6	11	5	6	3	5	1.83333	1.2	1.66667		39666.3	Fasciculation and elongation protein zeta-2 OS=Homo sapiens OX=9606 GN=FEZ2 PE=1 SV=2
3592	TRUE	Q8NBF6|AVL9_HUMAN	136.432	3	3	4	4	9	10	3	5	1	1.11111	1.66667		71947.4	Late secretory pathway protein AVL9 homolog OS=Homo sapiens OX=9606 GN=AVL9 PE=1 SV=1
2234	TRUE	Q3YEC7|RABL6_HUMAN	202.949	6	6	11	13	20	22	9	15	1.18182	1.1	1.66667	Carbamidomethylation	79548.8	Rab-like protein 6 OS=Homo sapiens OX=9606 GN=RABL6 PE=1 SV=2
3364	TRUE	Q9P2T1|GMPR2_HUMAN	147.376	3	3	6	13		1	3	5	2.16667	1	1.66667	Carbamidomethylation	37874.4	GMP reductase 2 OS=Homo sapiens OX=9606 GN=GMPR2 PE=1 SV=1
3897	TRUE	Q10588|BST1_HUMAN	122.228	2	2	3	6	3	3	9	15	2	1	1.66667	Oxidation (M)	35724	ADP-ribosyl cyclase/cyclic ADP-ribose hydrolase 2 OS=Homo sapiens OX=9606 GN=BST1 PE=1 SV=2
3225	TRUE	P35626|ARBK2_HUMAN	154.06	6	3	9	12	12	12	9	15	1.33333	1	1.66667	Carbamidomethylation	79709.7	Beta-adrenergic receptor kinase 2 OS=Homo sapiens OX=9606 GN=GRK3 PE=1 SV=2
5212	TRUE	Q9NVA4|T184C_HUMAN	63.0628	1	1	6	7	5	5	3	5	1.16667	1	1.66667		50141.6	Transmembrane protein 184C OS=Homo sapiens OX=9606 GN=TMEM184C PE=1 SV=2
3549	TRUE	Q7Z392|TPC11_HUMAN	138.149	5	5	6	7	10	10	6	10	1.16667	1	1.66667	Carbamidomethylation	128881	Trafficking protein particle complex subunit 11 OS=Homo sapiens OX=9606 GN=TRAPPC11 PE=1 SV=2
4695	TRUE	Q9H9G7|AGO3_HUMAN	85.1828	3	1	4	1	1		3	5	0.25	1	1.66667	Carbamidomethylation	97360.2	Protein argonaute-3 OS=Homo sapiens OX=9606 GN=AGO3 PE=1 SV=2
4622	TRUE	Q86Y07|VRK2_HUMAN	88.1805	1	1	6	1		1	3	5	0.166667	1	1.66667		58140.5	Serine/threonine-protein kinase VRK2 OS=Homo sapiens OX=9606 GN=VRK2 PE=1 SV=3
5109	TRUE	P02748|CO9_HUMAN	67.4924	1	1				1	3	5		1	1.66667		63173.4	Complement component C9 OS=Homo sapiens OX=9606 GN=C9 PE=1 SV=2
2340	TRUE	P08397|HEM3_HUMAN	197.875	7	7	18	18	18	16	6	10	1	0.888889	1.66667	Carbamidomethylation	39330.1	Porphobilinogen deaminase OS=Homo sapiens OX=9606 GN=HMBS PE=1 SV=2
3754	TRUE	Q9HCS7|SYF1_HUMAN	129.217	3	3	10	5	7	5	6	10	0.5	0.714286	1.66667		100010	Pre-mRNA-splicing factor SYF1 OS=Homo sapiens OX=9606 GN=XAB2 PE=1 SV=2
2744	TRUE	Q14849|STAR3_HUMAN	178.845	5	5	11	7	17	12	3	5	0.636364	0.705882	1.66667		50502.1	StAR-related lipid transfer protein 3 OS=Homo sapiens OX=9606 GN=STARD3 PE=1 SV=2
3752	TRUE	Q9UBX3|DIC_HUMAN	129.278	2	2		17	23	16	6	10	17	0.695652	1.66667	Carbamidomethylation	31282.5	Mitochondrial dicarboxylate carrier OS=Homo sapiens OX=9606 GN=SLC25A10 PE=1 SV=2
4335	TRUE	Q9NUQ2|PLCE_HUMAN	101.934	3	3	2	11	10	6	6	10	5.5	0.6	1.66667	Oxidation (M)	42072.2	1-acyl-sn-glycerol-3-phosphate acyltransferase epsilon OS=Homo sapiens OX=9606 GN=AGPAT5 PE=1 SV=3
4815	TRUE	Q9BVV7|TIM21_HUMAN	79.7096	2	2			2	1	3	5		0.5	1.66667		28202.4	Mitochondrial import inner membrane translocase subunit Tim21 OS=Homo sapiens OX=9606 GN=TIMM21 PE=1 SV=1
4985	TRUE	O60563|CCNT1_HUMAN	72.1702	1	1	2		3		3	5	0.5	0.333333	1.66667		80684.6	Cyclin-T1 OS=Homo sapiens OX=9606 GN=CCNT1 PE=1 SV=1
4844	TRUE	O14556|G3PT_HUMAN	78.698	2	1	4	5	4		3	5	1.25	0.25	1.66667		44501.2	Glyceraldehyde-3-phosphate dehydrogenase, testis-specific OS=Homo sapiens OX=9606 GN=GAPDHS PE=1 SV=2
2794	TRUE	Q96PM9|Z385A_HUMAN	175.893	7	7	12	28			6	10	2.33333		1.66667	Oxidation (M)	40453.7	Zinc finger protein 385A OS=Homo sapiens OX=9606 GN=ZNF385A PE=1 SV=2
4015	TRUE	Q8NFV4|ABHDB_HUMAN	117.172	3	3	2	4			6	10	2		1.66667		34689.9	Protein ABHD11 OS=Homo sapiens OX=9606 GN=ABHD11 PE=1 SV=1
3834	TRUE	Q96K21|ANCHR_HUMAN	125.328	4	4	5	5			3	5	1		1.66667		51546.3	Abscission/NoCut checkpoint regulator OS=Homo sapiens OX=9606 GN=ZFYVE19 PE=1 SV=3
5623	TRUE	Q2TAA5|ALG11_HUMAN	45.9108	1	1	3	1			3	5	0.333333		1.66667		55651	GDP-Man:Man(3)GlcNAc(2)-PP-Dol alpha-1,2-mannosyltransferase OS=Homo sapiens OX=9606 GN=ALG11 PE=1 SV=2
2237	TRUE	O75348|VATG1_HUMAN	202.937	8	8	32	38	47	35	26	43	1.1875	0.744681	1.65385	Oxidation (M); Carbamidomethylation	13757.5	V-type proton ATPase subunit G 1 OS=Homo sapiens OX=9606 GN=ATP6V1G1 PE=1 SV=3
1400	TRUE	Q96RQ9|OXLA_HUMAN	249.725	9	9	18	44	7	32	53	87	2.44444	4.57143	1.64151	Carbamidomethylation; Oxidation (M)	62881	L-amino-acid oxidase OS=Homo sapiens OX=9606 GN=IL4I1 PE=1 SV=1
4598	TRUE	P14406|CX7A2_HUMAN	89.2761	1	1	16	23	19	17	11	18	1.4375	0.894737	1.63636		9395.98	Cytochrome c oxidase subunit 7A2, mitochondrial OS=Homo sapiens OX=9606 GN=COX7A2 PE=1 SV=1
2362	TRUE	Q13094|LCP2_HUMAN	196.242	8	8	15	28	15	30	19	31	1.86667	2	1.63158	Carbamidomethylation	60188.2	Lymphocyte cytosolic protein 2 OS=Homo sapiens OX=9606 GN=LCP2 PE=1 SV=1
176	TRUE	P19971|TYPH_HUMAN	387.675	31	31	175	285	258	420	343	559	1.62857	1.62791	1.62974	Carbamidomethylation; Oxidation (M)	49955.5	Thymidine phosphorylase OS=Homo sapiens OX=9606 GN=TYMP PE=1 SV=2
3482	TRUE	Q86YQ8|CPNE8_HUMAN	141.34	5	5	6	5		8	16	26	0.833333	8	1.625	Oxidation (M); Carbamidomethylation	63107.6	Copine-8 OS=Homo sapiens OX=9606 GN=CPNE8 PE=1 SV=2
1803	TRUE	P32418|NAC1_HUMAN	225.118	6	6	51	64	17	30	32	52	1.2549	1.76471	1.625	Oxidation (M); Carbamidomethylation	108547	Sodium/calcium exchanger 1 OS=Homo sapiens OX=9606 GN=SLC8A1 PE=1 SV=3
3018	TRUE	Q00535|CDK5_HUMAN	164.162	5	5	16	17	14	16	16	26	1.0625	1.14286	1.625	Carbamidomethylation; Oxidation (M)	33304.5	Cyclin-dependent-like kinase 5 OS=Homo sapiens OX=9606 GN=CDK5 PE=1 SV=3
2666	TRUE	O95671|ASML_HUMAN	182.128	3	3	12	7		1	8	13	0.583333	1	1.625	Carbamidomethylation; Oxidation (M)	68856.7	Probable bifunctional dTTP/UTP pyrophosphatase/methyltransferase protein OS=Homo sapiens OX=9606 GN=ASMTL PE=1 SV=3
3030	TRUE	P52758|RIDA_HUMAN	163.762	4	4	16	15	12	11	8	13	0.9375	0.916667	1.625		14493.7	2-iminobutanoate/2-iminopropanoate deaminase OS=Homo sapiens OX=9606 GN=RIDA PE=1 SV=1
3842	TRUE	O75940|SPF30_HUMAN	124.897	3	3	19	26	19	17	16	26	1.36842	0.894737	1.625		26711.1	Survival of motor neuron-related-splicing factor 30 OS=Homo sapiens OX=9606 GN=SMNDC1 PE=1 SV=1
4123	TRUE	Q9Y296|TPPC4_HUMAN	112.952	2	2	13	16	8	7	16	26	1.23077	0.875	1.625		24340	Trafficking protein particle complex subunit 4 OS=Homo sapiens OX=9606 GN=TRAPPC4 PE=1 SV=1
4405	TRUE	Q7LG56|RIR2B_HUMAN	99.0004	2	2	6	10	9	6	8	13	1.66667	0.666667	1.625		40736.5	Ribonucleoside-diphosphate reductase subunit M2 B OS=Homo sapiens OX=9606 GN=RRM2B PE=1 SV=1
3710	TRUE	Q96EV8|DTBP1_HUMAN	130.986	4	4	4	4	5	3	8	13	1	0.6	1.625	Carbamidomethylation; Oxidation (M)	39493	Dysbindin OS=Homo sapiens OX=9606 GN=DTNBP1 PE=1 SV=1
3536	TRUE	O95249|GOSR1_HUMAN	138.594	4	4	15	13	12	6	8	13	0.866667	0.5	1.625	Oxidation (M)	28612.6	Golgi SNAP receptor complex member 1 OS=Homo sapiens OX=9606 GN=GOSR1 PE=1 SV=1
2760	TRUE	Q96AB6|NTAN1_HUMAN	177.953	6	6	18	13	10	5	16	26	0.722222	0.5	1.625	Carbamidomethylation; Oxidation (M)	34677.2	Protein N-terminal asparagine amidohydrolase OS=Homo sapiens OX=9606 GN=NTAN1 PE=1 SV=3
5006	TRUE	Q969E8|TSR2_HUMAN	71.3911	1	1		3	11		8	13	3	0.0909091	1.625	Oxidation (M)	20894	Pre-rRNA-processing protein TSR2 homolog OS=Homo sapiens OX=9606 GN=TSR2 PE=1 SV=1
3521	TRUE	O15431|COPT1_HUMAN	139.75	3	3	13	23		16	13	21	1.76923	16	1.61538	Carbamidomethylation; Oxidation (M)	21090.6	High affinity copper uptake protein 1 OS=Homo sapiens OX=9606 GN=SLC31A1 PE=1 SV=1
1837	TRUE	Q9H257|CARD9_HUMAN	223.563	10	10	18	12	17	22	23	37	0.666667	1.29412	1.6087		62240.6	Caspase recruitment domain-containing protein 9 OS=Homo sapiens OX=9606 GN=CARD9 PE=1 SV=2
744	TRUE	Q96CX2|KCD12_HUMAN	300.854	15	15	90	96	86	100	76	122	1.06667	1.16279	1.60526	Carbamidomethylation; Oxidation (M)	35700.8	BTB/POZ domain-containing protein KCTD12 OS=Homo sapiens OX=9606 GN=KCTD12 PE=1 SV=1
1054	TRUE	P42768|WASP_HUMAN	273.196	11	11	33	43	62	89	48	77	1.30303	1.43548	1.60417	Carbamidomethylation; Oxidation (M)	52912.6	Wiskott-Aldrich syndrome protein OS=Homo sapiens OX=9606 GN=WAS PE=1 SV=4
4680	TRUE	Q86X10|RLGPB_HUMAN	85.9539	2	2	5	3	1	3	5	8	0.6	3	1.6		166799	Ral GTPase-activating protein subunit beta OS=Homo sapiens OX=9606 GN=RALGAPB PE=1 SV=1
2926	TRUE	Q4G176|ACSF3_HUMAN	168.471	6	6	18	14	4	10	5	8	0.777778	2.5	1.6		64130.1	Malonate--CoA ligase ACSF3, mitochondrial OS=Homo sapiens OX=9606 GN=ACSF3 PE=1 SV=3
3298	TRUE	Q92604|LGAT1_HUMAN	150.068	5	5	13	13	8	10	5	8	1	1.25	1.6		43089.4	Acyl-CoA:lysophosphatidylglycerol acyltransferase 1 OS=Homo sapiens OX=9606 GN=LPGAT1 PE=1 SV=1
2851	TRUE	Q8IWB7|WDFY1_HUMAN	172.85	6	6	29	32	21	25	15	24	1.10345	1.19048	1.6	Carbamidomethylation; Oxidation (M)	46323.7	WD repeat and FYVE domain-containing protein 1 OS=Homo sapiens OX=9606 GN=WDFY1 PE=1 SV=1
2962	TRUE	Q92572|AP3S1_HUMAN	166.819	4	4	13	17	6	7	10	16	1.30769	1.16667	1.6	Oxidation (M)	21732.1	AP-3 complex subunit sigma-1 OS=Homo sapiens OX=9606 GN=AP3S1 PE=1 SV=1
3477	TRUE	Q9GZT8|NIF3L_HUMAN	141.595	4	4	8	9	15	17	10	16	1.125	1.13333	1.6	Oxidation (M)	41968	NIF3-like protein 1 OS=Homo sapiens OX=9606 GN=NIF3L1 PE=1 SV=2
4915	TRUE	P09917|LOX5_HUMAN	75.2048	2	2	3	2	1		5	8	0.666667	1	1.6	Carbamidomethylation	77983.2	Polyunsaturated fatty acid 5-lipoxygenase OS=Homo sapiens OX=9606 GN=ALOX5 PE=1 SV=2
2519	TRUE	Q9BY43|CHM4A_HUMAN	189.161	5	5	9	8	13	12	5	8	0.888889	0.923077	1.6		25098.3	Charged multivesicular body protein 4a OS=Homo sapiens OX=9606 GN=CHMP4A PE=1 SV=3
2716	TRUE	Q9H267|VP33B_HUMAN	180.177	5	5	9	16	9	8	10	16	1.77778	0.888889	1.6	Carbamidomethylation; Oxidation (M)	70585.3	Vacuolar protein sorting-associated protein 33B OS=Homo sapiens OX=9606 GN=VPS33B PE=1 SV=2
2273	TRUE	Q99829|CPNE1_HUMAN	201.263	9	9	21	26	21	15	20	32	1.2381	0.714286	1.6	Oxidation (M); Carbamidomethylation	59058.8	Copine-1 OS=Homo sapiens OX=9606 GN=CPNE1 PE=1 SV=1
1758	TRUE	Q9Y6Y0|NS1BP_HUMAN	228.205	9	9	11	19	37	26	20	32	1.72727	0.702703	1.6	Carbamidomethylation; Oxidation (M)	71729.4	Influenza virus NS1A-binding protein OS=Homo sapiens OX=9606 GN=IVNS1ABP PE=1 SV=3
3481	TRUE	Q6PJF5|RHDF2_HUMAN	141.36	7	7	5	8	6	4	5	8	1.6	0.666667	1.6	Carbamidomethylation; Oxidation (M)	96686.1	Inactive rhomboid protein 2 OS=Homo sapiens OX=9606 GN=RHBDF2 PE=1 SV=2
2763	TRUE	Q13098|CSN1_HUMAN	177.835	7	7	11	1	9	5	10	16	0.0909091	0.555556	1.6	Carbamidomethylation; Oxidation (M)	55536.6	COP9 signalosome complex subunit 1 OS=Homo sapiens OX=9606 GN=GPS1 PE=1 SV=4
4286	TRUE	Q8TDP1|RNH2C_HUMAN	105.172	2	2	2	5	6	3	5	8	2.5	0.5	1.6		17840.2	Ribonuclease H2 subunit C OS=Homo sapiens OX=9606 GN=RNASEH2C PE=1 SV=1
3306	TRUE	Q99447|PCY2_HUMAN	149.673	4	4	13	11	17	7	10	16	0.846154	0.411765	1.6		43835.5	Ethanolamine-phosphate cytidylyltransferase OS=Homo sapiens OX=9606 GN=PCYT2 PE=1 SV=1
3535	TRUE	Q8TEV9|SMCR8_HUMAN	138.658	5	5	11	11	3	1	15	24	1	0.333333	1.6		105022	Guanine nucleotide exchange protein SMCR8 OS=Homo sapiens OX=9606 GN=SMCR8 PE=1 SV=2
3132	TRUE	Q9Y223|GLCNE_HUMAN	158.856	4	4	3	7	4	1	10	16	2.33333	0.25	1.6	Oxidation (M)	79274.7	Bifunctional UDP-N-acetylglucosamine 2-epimerase/N-acetylmannosamine kinase OS=Homo sapiens OX=9606 GN=GNE PE=1 SV=1
448	TRUE	Q06323|PSME1_HUMAN	335.219	20	20	140	171	120	162	153	244	1.22143	1.35	1.59477	Carbamidomethylation; Oxidation (M)	28723.1	Proteasome activator complex subunit 1 OS=Homo sapiens OX=9606 GN=PSME1 PE=1 SV=1
927	TRUE	Q14165|MLEC_HUMAN	283.233	14	14	56	56	32	48	49	78	1	1.5	1.59184	Carbamidomethylation	32233.9	Malectin OS=Homo sapiens OX=9606 GN=MLEC PE=1 SV=1
2060	TRUE	Q5EBM0|CMPK2_HUMAN	212.156	10	10	10	19		22	22	35	1.9	22	1.59091	Carbamidomethylation	49447.8	UMP-CMP kinase 2, mitochondrial OS=Homo sapiens OX=9606 GN=CMPK2 PE=1 SV=3
2647	TRUE	Q9NZN3|EHD3_HUMAN	183.117	8	1	5	9	20	24	22	35	1.8	1.2	1.59091	Oxidation (M)	60887.1	EH domain-containing protein 3 OS=Homo sapiens OX=9606 GN=EHD3 PE=1 SV=2
2777	TRUE	Q8IYM9|TRI22_HUMAN	176.711	4	4	15	10		21	17	27	0.666667	21	1.58824		56947.2	E3 ubiquitin-protein ligase TRIM22 OS=Homo sapiens OX=9606 GN=TRIM22 PE=1 SV=1
2544	TRUE	Q15642|CIP4_HUMAN	187.541	7	7	10	17	16	18	12	19	1.7	1.125	1.58333	Oxidation (M)	68352.3	Cdc42-interacting protein 4 OS=Homo sapiens OX=9606 GN=TRIP10 PE=1 SV=3
3193	TRUE	Q4G0N4|NAKD2_HUMAN	155.916	5	5	13	18	13	12	12	19	1.38462	0.923077	1.58333		49432.9	NAD kinase 2, mitochondrial OS=Homo sapiens OX=9606 GN=NADK2 PE=1 SV=2
2651	TRUE	Q15208|STK38_HUMAN	183.002	6	5	11	8	5	4	12	19	0.727273	0.8	1.58333	Carbamidomethylation; Oxidation (M)	54190.2	Serine/threonine-protein kinase 38 OS=Homo sapiens OX=9606 GN=STK38 PE=1 SV=1
206	TRUE	O75874|IDHC_HUMAN	380.495	25	24	439	503	337	354	353	557	1.14579	1.05045	1.5779	Oxidation (M); Carbamidomethylation	46659.3	Isocitrate dehydrogenase [NADP] cytoplasmic OS=Homo sapiens OX=9606 GN=IDH1 PE=1 SV=2
1402	TRUE	P13747|HLAE_HUMAN	249.55	13	8	48	84	23	41	26	41	1.75	1.78261	1.57692	Carbamidomethylation	40057.6	HLA class I histocompatibility antigen, alpha chain E OS=Homo sapiens OX=9606 GN=HLA-E PE=1 SV=4
1115	FALSE	P0DMP2|SRG2B_HUMAN	234.136	10	10	13	25	11	24	21	33	1.92308	2.18182	1.57143	Carbamidomethylation; Oxidation (M)	53405.7	SLIT-ROBO Rho GTPase-activating protein 2B OS=Homo sapiens OX=9606 GN=SRGAP2B PE=3 SV=1
3555	FALSE	Q8TDB8|GTR14_HUMAN	109.976	2	2	6	7		2	7	11	1.16667	2	1.57143	Oxidation (M)	56320.1	Solute carrier family 2, facilitated glucose transporter member 14 OS=Homo sapiens OX=9606 GN=SLC2A14 PE=1 SV=1
1019	FALSE	Q5T764|IFT1B_HUMAN	113.425	2	2	1	1		2	7	11	1	2	1.57143		54993.1	Interferon-induced protein with tetratricopeptide repeats 1B OS=Homo sapiens OX=9606 GN=IFIT1B PE=1 SV=1
4489	TRUE	P45984|MK09_HUMAN	94.5232	3	3	6	2	3	6	7	11	0.333333	2	1.57143	Oxidation (M)	48139.1	Mitogen-activated protein kinase 9 OS=Homo sapiens OX=9606 GN=MAPK9 PE=1 SV=2
3617	TRUE	Q14562|DHX8_HUMAN	135.2	4	3	11	17	3	4	7	11	1.54545	1.33333	1.57143	Carbamidomethylation	139315	ATP-dependent RNA helicase DHX8 OS=Homo sapiens OX=9606 GN=DHX8 PE=1 SV=1
3349	TRUE	P46019|KPB2_HUMAN	147.903	4	4	10	10	5	6	7	11	1	1.2	1.57143	Oxidation (M)	138408	Phosphorylase b kinase regulatory subunit alpha, liver isoform OS=Homo sapiens OX=9606 GN=PHKA2 PE=1 SV=1
4092	TRUE	Q9H3K2|GHITM_HUMAN	114.265	4	4	11	11	13	13	7	11	1	1	1.57143	Oxidation (M)	37205.2	Growth hormone-inducible transmembrane protein OS=Homo sapiens OX=9606 GN=GHITM PE=1 SV=2
2922	TRUE	Q9NVM6|DJC17_HUMAN	168.643	4	4	3	5	9	3	7	11	1.66667	0.333333	1.57143		34687.3	DnaJ homolog subfamily C member 17 OS=Homo sapiens OX=9606 GN=DNAJC17 PE=1 SV=1
4976	TRUE	Q8N2U9|S66A2_HUMAN	72.6359	1	1	3				7	11	0.333333		1.57143		30477.6	Solute carrier family 66 member 2 OS=Homo sapiens OX=9606 GN=SLC66A2 PE=1 SV=1
2910	TRUE	Q6IA69|NADE_HUMAN	169.746	6	6	13	15	18	6	16	25	1.15385	0.333333	1.5625	Carbamidomethylation	79284.7	Glutamine-dependent NAD(+) synthetase OS=Homo sapiens OX=9606 GN=NADSYN1 PE=1 SV=3
4967	TRUE	Q969T4|UB2E3_HUMAN	73.0838	1	1	1	9	1	10	9	14	9	10	1.55556	Carbamidomethylation	22912.6	Ubiquitin-conjugating enzyme E2 E3 OS=Homo sapiens OX=9606 GN=UBE2E3 PE=1 SV=1
4967	TRUE	Q96LR5|UB2E2_HUMAN	73.0838	1	1	1	9	1	10	9	14	9	10	1.55556	Carbamidomethylation	22255.1	Ubiquitin-conjugating enzyme E2 E2 OS=Homo sapiens OX=9606 GN=UBE2E2 PE=1 SV=1
2452	TRUE	O15085|ARHGB_HUMAN	192.579	8	8	15	14	1	4	9	14	0.933333	4	1.55556		167704	Rho guanine nucleotide exchange factor 11 OS=Homo sapiens OX=9606 GN=ARHGEF11 PE=1 SV=1
3611	TRUE	Q8TB03|CX038_HUMAN	135.482	4	4	10	10	3	4	9	14	1	1.33333	1.55556	Carbamidomethylation	36669.9	Uncharacterized protein CXorf38 OS=Homo sapiens OX=9606 GN=CXorf38 PE=1 SV=1
1468	TRUE	Q92609|TBCD5_HUMAN	245.145	12	12	27	22	34	36	27	42	0.814815	1.05882	1.55556	Oxidation (M); Carbamidomethylation	89004.4	TBC1 domain family member 5 OS=Homo sapiens OX=9606 GN=TBC1D5 PE=1 SV=1
4024	TRUE	Q9BU02|THTPA_HUMAN	116.833	3	3	6	11	7	7	9	14	1.83333	1	1.55556	Carbamidomethylation	25565.9	Thiamine-triphosphatase OS=Homo sapiens OX=9606 GN=THTPA PE=1 SV=3
2492	TRUE	P50579|MAP2_HUMAN	190.727	8	8	25	8	23	22	27	42	0.32	0.956522	1.55556	Oxidation (M); Carbamidomethylation	52891.6	Methionine aminopeptidase 2 OS=Homo sapiens OX=9606 GN=METAP2 PE=1 SV=1
2514	TRUE	Q0VDG4|SCRN3_HUMAN	189.38	7	7	10	12	8	7	9	14	1.2	0.875	1.55556		48544.3	Secernin-3 OS=Homo sapiens OX=9606 GN=SCRN3 PE=1 SV=1
3354	TRUE	Q00765|REEP5_HUMAN	147.753	5	5	31	34	7	5	9	14	1.09677	0.714286	1.55556	Carbamidomethylation; Oxidation (M)	21493.1	Receptor expression-enhancing protein 5 OS=Homo sapiens OX=9606 GN=REEP5 PE=1 SV=3
2829	TRUE	Q8IXJ6|SIR2_HUMAN	173.977	6	6	19	13	13	7	9	14	0.684211	0.538462	1.55556	Carbamidomethylation	43182.2	NAD-dependent protein deacetylase sirtuin-2 OS=Homo sapiens OX=9606 GN=SIRT2 PE=1 SV=2
375	TRUE	Q12802|AKP13_HUMAN	346.372	31	31	56	74	28	48	47	73	1.32143	1.71429	1.55319	Oxidation (M); Carbamidomethylation	307550	A-kinase anchor protein 13 OS=Homo sapiens OX=9606 GN=AKAP13 PE=1 SV=2
1982	TRUE	O14727|APAF_HUMAN	216.21	9	9	17	20	5	18	20	31	1.17647	3.6	1.55	Carbamidomethylation; Oxidation (M)	141840	Apoptotic protease-activating factor 1 OS=Homo sapiens OX=9606 GN=APAF1 PE=1 SV=2
2043	TRUE	O75688|PPM1B_HUMAN	212.896	8	8	30	21	27	20	20	31	0.7	0.740741	1.55	Oxidation (M); Carbamidomethylation	52642.6	Protein phosphatase 1B OS=Homo sapiens OX=9606 GN=PPM1B PE=1 SV=1
1411	TRUE	Q8N0X7|SPART_HUMAN	249.054	12	12	33	29	28	28	42	65	0.878788	1	1.54762	Carbamidomethylation	72833	Spartin OS=Homo sapiens OX=9606 GN=SPART PE=1 SV=1
2280	TRUE	Q8N3U4|STAG2_HUMAN	200.551	7	5	12	29	8	13	22	34	2.41667	1.625	1.54545	Carbamidomethylation; Oxidation (M)	141326	Cohesin subunit SA-2 OS=Homo sapiens OX=9606 GN=STAG2 PE=1 SV=3
2319	TRUE	P50452|SPB8_HUMAN	198.668	8	7	28	43	22	25	33	51	1.53571	1.13636	1.54545	Carbamidomethylation; Oxidation (M)	42766.9	Serpin B8 OS=Homo sapiens OX=9606 GN=SERPINB8 PE=1 SV=2
2886	TRUE	Q6P589|TP8L2_HUMAN	171.364	5	5	22	15	14	15	11	17	0.681818	1.07143	1.54545		20555.7	Tumor necrosis factor alpha-induced protein 8-like protein 2 OS=Homo sapiens OX=9606 GN=TNFAIP8L2 PE=1 SV=1
3423	TRUE	O43772|MCAT_HUMAN	144.148	5	5	3	6	10	7	11	17	2	0.7	1.54545	Carbamidomethylation; Oxidation (M)	32943.7	Mitochondrial carnitine/acylcarnitine carrier protein OS=Homo sapiens OX=9606 GN=SLC25A20 PE=1 SV=1
2317	TRUE	Q9UBR2|CATZ_HUMAN	198.712	7	7	39	26	60	64	46	71	0.666667	1.06667	1.54348	Carbamidomethylation; Oxidation (M)	33867.9	Cathepsin Z OS=Homo sapiens OX=9606 GN=CTSZ PE=1 SV=1
1639	TRUE	P49902|5NTC_HUMAN	234.37	12	12	12	20	31	35	35	54	1.66667	1.12903	1.54286	Oxidation (M); Carbamidomethylation	64969.8	Cytosolic purine 5'-nucleotidase OS=Homo sapiens OX=9606 GN=NT5C2 PE=1 SV=1
2260	TRUE	Q99570|PI3R4_HUMAN	201.839	7	7	13	13	21	23	24	37	1	1.09524	1.54167	Oxidation (M)	153103	Phosphoinositide 3-kinase regulatory subunit 4 OS=Homo sapiens OX=9606 GN=PIK3R4 PE=1 SV=3
2558	TRUE	O75223|GGCT_HUMAN	186.825	7	7	20	18	9	27	37	57	0.9	3	1.54054	Oxidation (M)	21007.7	Gamma-glutamylcyclotransferase OS=Homo sapiens OX=9606 GN=GGCT PE=1 SV=1
1101	TRUE	O95786|DDX58_HUMAN	270.217	16	16	22	24	19	20	37	57	1.09091	1.05263	1.54054	Carbamidomethylation; Oxidation (M)	106600	Antiviral innate immune response receptor RIG-I OS=Homo sapiens OX=9606 GN=DDX58 PE=1 SV=2
1762	TRUE	O43765|SGTA_HUMAN	228.02	8	8	33	31	25	16	39	60	0.939394	0.64	1.53846	Carbamidomethylation	34063.1	Small glutamine-rich tetratricopeptide repeat-containing protein alpha OS=Homo sapiens OX=9606 GN=SGTA PE=1 SV=1
2142	TRUE	O94888|UBXN7_HUMAN	207.929	7	7	13	28	21	19	15	23	2.15385	0.904762	1.53333		54862.3	UBX domain-containing protein 7 OS=Homo sapiens OX=9606 GN=UBXN7 PE=1 SV=2
919	TRUE	P29466|CASP1_HUMAN	284.152	13	12	57	65	48	56	49	75	1.14035	1.16667	1.53061	Carbamidomethylation; Oxidation (M)	45158.6	Caspase-1 OS=Homo sapiens OX=9606 GN=CASP1 PE=1 SV=1
3315	TRUE	Q9NQE9|HINT3_HUMAN	149.189	5	5	7	7	6	6	17	26	1	1	1.52941	Oxidation (M); Carbamidomethylation	20361.3	Histidine triad nucleotide-binding protein 3 OS=Homo sapiens OX=9606 GN=HINT3 PE=1 SV=1
1115	FALSE	P0DJJ0|SRG2C_HUMAN	221.438	9	9	13	24	6	20	21	32	1.84615	3.33333	1.52381	Carbamidomethylation; Oxidation (M)	53483.7	SLIT-ROBO Rho GTPase-activating protein 2C OS=Homo sapiens OX=9606 GN=SRGAP2C PE=1 SV=1
2430	TRUE	P15927|RFA2_HUMAN	193.729	4	4	33	28	30	22	23	35	0.848485	0.733333	1.52174	Oxidation (M)	29246.8	Replication protein A 32 kDa subunit OS=Homo sapiens OX=9606 GN=RPA2 PE=1 SV=1
1538	TRUE	O14776|TCRG1_HUMAN	239.999	14	14	25	34	10	14	25	38	1.36	1.4	1.52	Oxidation (M)	123901	Transcription elongation regulator 1 OS=Homo sapiens OX=9606 GN=TCERG1 PE=1 SV=2
559	TRUE	Q92619|HMHA1_HUMAN	320.796	19	19	65	75	46	67	76	115	1.15385	1.45652	1.51316	Carbamidomethylation; Oxidation (M)	124614	Rho GTPase-activating protein 45 OS=Homo sapiens OX=9606 GN=ARHGAP45 PE=1 SV=2
4182	TRUE	Q9Y3S2|ZN330_HUMAN	109.721	2	2	6	7		10	6	9	1.16667	10	1.5		36201.3	Zinc finger protein 330 OS=Homo sapiens OX=9606 GN=ZNF330 PE=1 SV=1
3959	TRUE	O14683|P5I11_HUMAN	119.594	3	3	9	3		5	2	3	0.333333	5	1.5		21053.9	Tumor protein p53-inducible protein 11 OS=Homo sapiens OX=9606 GN=TP53I11 PE=1 SV=2
2780	FALSE	Q8WVN8|UB2Q2_HUMAN	61.3107	1	1	2	4	2	5	2	3	2	2.5	1.5		42818.3	Ubiquitin-conjugating enzyme E2 Q2 OS=Homo sapiens OX=9606 GN=UBE2Q2 PE=1 SV=1
3671	TRUE	Q9UIA9|XPO7_HUMAN	132.493	4	4	11	10	4	10	10	15	0.909091	2.5	1.5	Carbamidomethylation	123907	Exportin-7 OS=Homo sapiens OX=9606 GN=XPO7 PE=1 SV=3
4706	TRUE	P49459|UBE2A_HUMAN	84.7901	1	1	5	11	7	17	8	12	2.2	2.42857	1.5		17315.4	Ubiquitin-conjugating enzyme E2 A OS=Homo sapiens OX=9606 GN=UBE2A PE=1 SV=2
5255	TRUE	Q9NZ43|USE1_HUMAN	61.4087	1	1	1		1	2	2	3	1	2	1.5		29371.1	Vesicle transport protein USE1 OS=Homo sapiens OX=9606 GN=USE1 PE=1 SV=2
1144	TRUE	Q6JBY9|CPZIP_HUMAN	267.324	9	9	24	23	18	34	38	57	0.958333	1.88889	1.5	Carbamidomethylation	44503.9	CapZ-interacting protein OS=Homo sapiens OX=9606 GN=RCSD1 PE=1 SV=1
3184	TRUE	Q14964|RB39A_HUMAN	156.232	5	3	3	4	5	9	18	27	1.33333	1.8	1.5	Carbamidomethylation	25006.7	Ras-related protein Rab-39A OS=Homo sapiens OX=9606 GN=RAB39A PE=1 SV=2
3733	TRUE	Q9BVP2|GNL3_HUMAN	130.079	4	4	18	18	4	7	6	9	1	1.75	1.5		61993.2	Guanine nucleotide-binding protein-like 3 OS=Homo sapiens OX=9606 GN=GNL3 PE=1 SV=2
2893	TRUE	Q96DM3|RMC1_HUMAN	170.928	5	5	15	12	4	7	8	12	0.8	1.75	1.5	Carbamidomethylation; Oxidation (M)	74974.6	Regulator of MON1-CCZ1 complex OS=Homo sapiens OX=9606 GN=RMC1 PE=1 SV=2
3818	TRUE	Q13630|FCL_HUMAN	126.049	6	6	11	11	3	5	8	12	1	1.66667	1.5	Carbamidomethylation	35892.7	GDP-L-fucose synthase OS=Homo sapiens OX=9606 GN=GFUS PE=1 SV=1
3460	TRUE	Q9BVC6|TM109_HUMAN	141.931	3	3	20	14	10	15	14	21	0.7	1.5	1.5		26210	Transmembrane protein 109 OS=Homo sapiens OX=9606 GN=TMEM109 PE=1 SV=1
1881	TRUE	Q96P70|IPO9_HUMAN	220.873	9	9	31	32	13	18	20	30	1.03226	1.38462	1.5	Carbamidomethylation; Oxidation (M)	115963	Importin-9 OS=Homo sapiens OX=9606 GN=IPO9 PE=1 SV=3
2771	TRUE	O00193|SMAP_HUMAN	177.326	3	3	34	51	35	48	38	57	1.5	1.37143	1.5	Oxidation (M)	20332.5	Small acidic protein OS=Homo sapiens OX=9606 GN=SMAP PE=1 SV=1
3205	TRUE	Q16774|KGUA_HUMAN	155.129	5	5	8	13	11	15	2	3	1.625	1.36364	1.5	Carbamidomethylation	21725.6	Guanylate kinase OS=Homo sapiens OX=9606 GN=GUK1 PE=1 SV=2
5117	TRUE	A9UHW6|MI4GD_HUMAN	67.1315	1	1		1	3	4	2	3	1	1.33333	1.5		25423.2	MIF4G domain-containing protein OS=Homo sapiens OX=9606 GN=MIF4GD PE=1 SV=1
3229	TRUE	Q9UKW4|VAV3_HUMAN	153.922	6	5	4	8	5	6	16	24	2	1.2	1.5		97775.9	Guanine nucleotide exchange factor VAV3 OS=Homo sapiens OX=9606 GN=VAV3 PE=1 SV=1
717	FALSE	Q96L14|C170L_HUMAN	127.035	3	3	10	7	10	11	4	6	0.7	1.1	1.5	Oxidation (M)	32648.4	Cep170-like protein OS=Homo sapiens OX=9606 GN=CEP170P1 PE=5 SV=2
3976	TRUE	Q8TAF3|WDR48_HUMAN	118.802	4	4	5	7	1		4	6	1.4	1	1.5	Carbamidomethylation	76210.5	WD repeat-containing protein 48 OS=Homo sapiens OX=9606 GN=WDR48 PE=1 SV=1
317	FALSE	Q92995|UBP13_HUMAN	55.401	1	1	3	4	1	1	4	6	1.33333	1	1.5		97327.1	Ubiquitin carboxyl-terminal hydrolase 13 OS=Homo sapiens OX=9606 GN=USP13 PE=1 SV=2
3576	TRUE	Q9UQ90|SPG7_HUMAN	137.186	5	5	14	17	3	3	2	3	1.21429	1	1.5		88234.7	Paraplegin OS=Homo sapiens OX=9606 GN=SPG7 PE=1 SV=2
4162	TRUE	P62253|UB2G1_HUMAN	110.598	2	2	8	8	7	7	6	9	1	1	1.5		19509.2	Ubiquitin-conjugating enzyme E2 G1 OS=Homo sapiens OX=9606 GN=UBE2G1 PE=1 SV=3
5339	TRUE	Q99807|COQ7_HUMAN	58.822	1	1	3	2	1	1	4	6	0.666667	1	1.5		24277	5-demethoxyubiquinone hydroxylase, mitochondrial OS=Homo sapiens OX=9606 GN=COQ7 PE=1 SV=3
4224	TRUE	Q96IY1|NSL1_HUMAN	107.755	2	2	3	2	1		4	6	0.666667	1	1.5		32161.9	Kinetochore-associated protein NSL1 homolog OS=Homo sapiens OX=9606 GN=NSL1 PE=1 SV=3
4955	TRUE	Q9Y6R0|NUMBL_HUMAN	73.768	2	1	8	5	2	2	4	6	0.625	1	1.5		64891.4	Numb-like protein OS=Homo sapiens OX=9606 GN=NUMBL PE=1 SV=1
4705	TRUE	Q96B96|LDAF1_HUMAN	84.825	2	2	11	5	3	3	2	3	0.454545	1	1.5		17521.8	Lipid droplet assembly factor 1 OS=Homo sapiens OX=9606 GN=TMEM159 PE=1 SV=2
5223	TRUE	Q9H0U9|TSYL1_HUMAN	62.6084	1	1	8	1	2	2	4	6	0.125	1	1.5		49192.4	Testis-specific Y-encoded-like protein 1 OS=Homo sapiens OX=9606 GN=TSPYL1 PE=1 SV=3
3335	TRUE	Q8TEQ0|SNX29_HUMAN	148.485	6	6	8	13	14	13	6	9	1.625	0.928571	1.5		91253.7	Sorting nexin-29 OS=Homo sapiens OX=9606 GN=SNX29 PE=1 SV=3
2875	TRUE	P86791|CCZ1_HUMAN	171.911	7	7	15	16	12	10	8	12	1.06667	0.833333	1.5		55866.2	Vacuolar fusion protein CCZ1 homolog OS=Homo sapiens OX=9606 GN=CCZ1 PE=1 SV=1
2875	TRUE	P86790|CCZ1B_HUMAN	171.911	7	7	15	16	12	10	8	12	1.06667	0.833333	1.5		55866.2	Vacuolar fusion protein CCZ1 homolog B OS=Homo sapiens OX=9606 GN=CCZ1B PE=1 SV=1
5239	TRUE	Q9NVC3|S38A7_HUMAN	62.131	1	1	2	2	5	4	2	3	1	0.8	1.5	Carbamidomethylation	49965.7	Putative sodium-coupled neutral amino acid transporter 7 OS=Homo sapiens OX=9606 GN=SLC38A7 PE=1 SV=1
2034	TRUE	Q14012|KCC1A_HUMAN	213.16	9	7	21	29	19	15	18	27	1.38095	0.789474	1.5	Oxidation (M)	41337.1	Calcium/calmodulin-dependent protein kinase type 1 OS=Homo sapiens OX=9606 GN=CAMK1 PE=1 SV=1
4060	TRUE	Q9BRQ6|MIC25_HUMAN	115.484	2	2	5	7	9	7	6	9	1.4	0.777778	1.5		26457.7	MICOS complex subunit MIC25 OS=Homo sapiens OX=9606 GN=CHCHD6 PE=1 SV=1
2750	TRUE	O43678|NDUA2_HUMAN	178.55	4	4	28	36	22	17	10	15	1.28571	0.772727	1.5	Carbamidomethylation	10921.6	NADH dehydrogenase [ubiquinone] 1 alpha subcomplex subunit 2 OS=Homo sapiens OX=9606 GN=NDUFA2 PE=1 SV=3
3807	TRUE	P49917|DNLI4_HUMAN	126.625	4	4	8	3	11	8	2	3	0.375	0.727273	1.5		103971	DNA ligase 4 OS=Homo sapiens OX=9606 GN=LIG4 PE=1 SV=2
2477	TRUE	Q96MW1|CCD43_HUMAN	191.493	7	7	11	10	13	8	12	18	0.909091	0.615385	1.5	Oxidation (M)	25248.2	Coiled-coil domain-containing protein 43 OS=Homo sapiens OX=9606 GN=CCDC43 PE=1 SV=2
4557	TRUE	Q8NFH8|REPS2_HUMAN	91.233	3	2	5	4	5	3	4	6	0.8	0.6	1.5		71533.6	RalBP1-associated Eps domain-containing protein 2 OS=Homo sapiens OX=9606 GN=REPS2 PE=1 SV=2
5288	TRUE	Q9Y6D0|SELK_HUMAN	60.4718	1	1	2	3	2		2	3	1.5	0.5	1.5		10613.8	Selenoprotein K OS=Homo sapiens OX=9606 GN=SELENOK PE=1 SV=3
4587	TRUE	Q969Q5|RAB24_HUMAN	89.9722	2	2	1		2		4	6	1	0.5	1.5		23124.1	Ras-related protein Rab-24 OS=Homo sapiens OX=9606 GN=RAB24 PE=1 SV=1
2643	TRUE	O95777|LSM8_HUMAN	183.33	4	4	8	7	24	11	14	21	0.875	0.458333	1.5		10402.6	U6 snRNA-associated Sm-like protein LSm8 OS=Homo sapiens OX=9606 GN=LSM8 PE=1 SV=3
3010	TRUE	Q9H501|ESF1_HUMAN	164.646	6	6	9	9	7	3	6	9	1	0.428571	1.5	Carbamidomethylation	98796.1	ESF1 homolog OS=Homo sapiens OX=9606 GN=ESF1 PE=1 SV=1
3113	TRUE	Q5VTQ0|TT39B_HUMAN	159.72	4	4	14	12	7	3	2	3	0.857143	0.428571	1.5	Carbamidomethylation	76955.6	Tetratricopeptide repeat protein 39B OS=Homo sapiens OX=9606 GN=TTC39B PE=1 SV=4
3695	TRUE	P18615|NELFE_HUMAN	131.543	4	4	12	13	6		6	9	1.08333	0.166667	1.5	Oxidation (M)	43239.8	Negative elongation factor E OS=Homo sapiens OX=9606 GN=NELFE PE=1 SV=3
3956	TRUE	Q7L4I2|RSRC2_HUMAN	119.639	3	3		12			4	6	12		1.5	Oxidation (M); Carbamidomethylation	50559.7	Arginine/serine-rich coiled-coil protein 2 OS=Homo sapiens OX=9606 GN=RSRC2 PE=1 SV=1
5509	TRUE	Q9NW81|DMAC2_HUMAN	51.3609	1	1	1	4			2	3	4		1.5		29267.5	Distal membrane-arm assembly complex protein 2 OS=Homo sapiens OX=9606 GN=DMAC2 PE=1 SV=3
4724	TRUE	P36404|ARL2_HUMAN	83.7217	2	2	1	3			2	3	3		1.5		20878	ADP-ribosylation factor-like protein 2 OS=Homo sapiens OX=9606 GN=ARL2 PE=1 SV=4
5285	TRUE	Q9H1K0|RBNS5_HUMAN	60.6171	1	1		1			2	3	1		1.5		88869.7	Rabenosyn-5 OS=Homo sapiens OX=9606 GN=RBSN PE=1 SV=2
5234	TRUE	O76095|JTB_HUMAN	62.2366	1	1	1				2	3	1		1.5	Carbamidomethylation	16358.2	Protein JTB OS=Homo sapiens OX=9606 GN=JTB PE=1 SV=1
5402	TRUE	Q9BRD0|BUD13_HUMAN	56.0399	1	1	1				2	3	1		1.5		70520.8	BUD13 homolog OS=Homo sapiens OX=9606 GN=BUD13 PE=1 SV=1
3261	TRUE	Q9UQC2|GAB2_HUMAN	151.805	4	4	10	10			10	15	1		1.5		74457.6	GRB2-associated-binding protein 2 OS=Homo sapiens OX=9606 GN=GAB2 PE=1 SV=1
3639	TRUE	O43924|PDE6D_HUMAN	133.748	3	3	8	3			4	6	0.375		1.5		17420	Retinal rod rhodopsin-sensitive cGMP 3',5'-cyclic phosphodiesterase subunit delta OS=Homo sapiens OX=9606 GN=PDE6D PE=1 SV=1
3673	TRUE	Q96CP2|FWCH2_HUMAN	132.341	4	4	9	2			8	12	0.222222		1.5	Carbamidomethylation	14563.5	FLYWCH family member 2 OS=Homo sapiens OX=9606 GN=FLYWCH2 PE=1 SV=1
3693	TRUE	Q9HBF4|ZFYV1_HUMAN	131.629	5	5	6				2	3	0.166667		1.5	Carbamidomethylation	87175.8	Zinc finger FYVE domain-containing protein 1 OS=Homo sapiens OX=9606 GN=ZFYVE1 PE=1 SV=1
4652	TRUE	Q58A45|PAN3_HUMAN	86.6874	2	2					2	3			1.5		95613	PAN2-PAN3 deadenylation complex subunit PAN3 OS=Homo sapiens OX=9606 GN=PAN3 PE=1 SV=3
5167	TRUE	Q9H6S0|YTDC2_HUMAN	65.2473	1	1					2	3			1.5	Carbamidomethylation	160248	3'-5' RNA helicase YTHDC2 OS=Homo sapiens OX=9606 GN=YTHDC2 PE=1 SV=2
5342	TRUE	Q9P0R6|GSKIP_HUMAN	58.7933	1	1					2	3			1.5	Carbamidomethylation	15648.5	GSK3B-interacting protein OS=Homo sapiens OX=9606 GN=GSKIP PE=1 SV=2
5361	TRUE	Q15022|SUZ12_HUMAN	57.7609	1	1					2	3			1.5		83054.8	Polycomb protein SUZ12 OS=Homo sapiens OX=9606 GN=SUZ12 PE=1 SV=3
5407	TRUE	Q6XZF7|DNMBP_HUMAN	55.904	1	1					2	3			1.5		177347	Dynamin-binding protein OS=Homo sapiens OX=9606 GN=DNMBP PE=1 SV=1
5685	TRUE	Q96F85|CNRP1_HUMAN	42.7392	1	1					2	3			1.5		18648.3	CB1 cannabinoid receptor-interacting protein 1 OS=Homo sapiens OX=9606 GN=CNRIP1 PE=1 SV=1
4597	TRUE	Q7Z4H3|HDDC2_HUMAN	89.3242	2	2					4	6			1.5		23390.5	5'-deoxynucleotidase HDDC2 OS=Homo sapiens OX=9606 GN=HDDC2 PE=1 SV=1
958	TRUE	A6NHR9|SMHD1_HUMAN	279.931	18	18	39	55	7	31	41	61	1.41026	4.42857	1.4878	Oxidation (M)	226374	Structural maintenance of chromosomes flexible hinge domain-containing protein 1 OS=Homo sapiens OX=9606 GN=SMCHD1 PE=1 SV=2
2533	TRUE	P51580|TPMT_HUMAN	188.259	5	5	16	19	20	17	27	40	1.1875	0.85	1.48148	Carbamidomethylation	28180.3	Thiopurine S-methyltransferase OS=Homo sapiens OX=9606 GN=TPMT PE=1 SV=1
1390	TRUE	Q7Z6I6|RHG30_HUMAN	250.217	9	8	38	49	29	29	25	37	1.28947	1	1.48	Carbamidomethylation	118582	Rho GTPase-activating protein 30 OS=Homo sapiens OX=9606 GN=ARHGAP30 PE=1 SV=3
1887	TRUE	Q96PY5|FMNL2_HUMAN	220.601	11	8	27	36	14	18	23	34	1.33333	1.28571	1.47826	Oxidation (M)	123321	Formin-like protein 2 OS=Homo sapiens OX=9606 GN=FMNL2 PE=1 SV=3
2602	TRUE	Q969J3|BORC5_HUMAN	184.893	6	6	25	18	13	10	23	34	0.72	0.769231	1.47826	Oxidation (M); Carbamidomethylation	22222.4	BLOC-1-related complex subunit 5 OS=Homo sapiens OX=9606 GN=BORCS5 PE=1 SV=1
1714	TRUE	O43516|WIPF1_HUMAN	230.354	8	8	16	23	18	37	40	59	1.4375	2.05556	1.475	Carbamidomethylation	51258.5	WAS/WASL-interacting protein family member 1 OS=Homo sapiens OX=9606 GN=WIPF1 PE=1 SV=3
1576	TRUE	P17676|CEBPB_HUMAN	237.864	9	9	33	40	16	29	19	28	1.21212	1.8125	1.47368	Carbamidomethylation; Oxidation (M)	36105.8	CCAAT/enhancer-binding protein beta OS=Homo sapiens OX=9606 GN=CEBPB PE=1 SV=2
3317	TRUE	P62330|ARF6_HUMAN	149.085	4	4	23	29	12	8	19	28	1.26087	0.666667	1.47368	Oxidation (M)	20082.2	ADP-ribosylation factor 6 OS=Homo sapiens OX=9606 GN=ARF6 PE=1 SV=2
1376	TRUE	P27105|STOM_HUMAN	250.946	10	10	49	59	30	92	53	78	1.20408	3.06667	1.4717	Oxidation (M); Carbamidomethylation	31730.8	Stomatin OS=Homo sapiens OX=9606 GN=STOM PE=1 SV=3
695	FALSE	A4FU28|CTGE9_HUMAN	148.348	3	3	12	12	4	7	15	22	1	1.75	1.46667	Carbamidomethylation	87952.9	cTAGE family member 9 OS=Homo sapiens OX=9606 GN=CTAGE9 PE=2 SV=2
1184	FALSE	P48448|AL3B2_HUMAN	177.666	4	3	6	8	9	12	15	22	1.33333	1.33333	1.46667	Carbamidomethylation	42634.9	Aldehyde dehydrogenase family 3 member B2 OS=Homo sapiens OX=9606 GN=ALDH3B2 PE=2 SV=3
2718	TRUE	Q9Y679|AUP1_HUMAN	179.964	6	6	14	11	12	1	15	22	0.785714	0.0833333	1.46667		45786.9	Lipid droplet-regulating VLDL assembly factor AUP1 OS=Homo sapiens OX=9606 GN=AUP1 PE=1 SV=2
694	TRUE	P13762|DRB4_HUMAN	305.327	13	6	15	31	14	40	86	126	2.06667	2.85714	1.46512	Oxidation (M); Carbamidomethylation	29941.1	HLA class II histocompatibility antigen, DR beta 4 chain OS=Homo sapiens OX=9606 GN=HLA-DRB4 PE=1 SV=2
696	TRUE	Q6NYC8|PPR18_HUMAN	304.813	16	16	105	107	85	106	121	177	1.01905	1.24706	1.46281	Carbamidomethylation; Oxidation (M)	67942.6	Phostensin OS=Homo sapiens OX=9606 GN=PPP1R18 PE=1 SV=1
2551	TRUE	Q99523|SORT_HUMAN	187.251	8	8	4	19	12	29	13	19	4.75	2.41667	1.46154	Carbamidomethylation; Oxidation (M)	92067.7	Sortilin OS=Homo sapiens OX=9606 GN=SORT1 PE=1 SV=3
3348	TRUE	P35813|PPM1A_HUMAN	147.939	6	6	31	26	14	22	24	35	0.83871	1.57143	1.45833	Carbamidomethylation	42447.7	Protein phosphatase 1A OS=Homo sapiens OX=9606 GN=PPM1A PE=1 SV=1
1340	TRUE	O15533|TPSN_HUMAN	253.397	14	14	39	73	38	87	55	80	1.87179	2.28947	1.45455	Carbamidomethylation; Oxidation (M)	47625.8	Tapasin OS=Homo sapiens OX=9606 GN=TAPBP PE=1 SV=1
1819	TRUE	Q9H2D6|TARA_HUMAN	224.268	12	11	16	18	6	9	22	32	1.125	1.5	1.45455	Carbamidomethylation	261376	TRIO and F-actin-binding protein OS=Homo sapiens OX=9606 GN=TRIOBP PE=1 SV=3
1729	TRUE	P42229|STA5A_HUMAN	229.358	14	3	19	16	21	26	33	48	0.842105	1.2381	1.45455	Carbamidomethylation	90647	Signal transducer and activator of transcription 5A OS=Homo sapiens OX=9606 GN=STAT5A PE=1 SV=1
752	TRUE	Q5JSL3|DOC11_HUMAN	299.685	25	25	34	57	24	29	33	48	1.67647	1.20833	1.45455	Carbamidomethylation	237671	Dedicator of cytokinesis protein 11 OS=Homo sapiens OX=9606 GN=DOCK11 PE=1 SV=2
3661	TRUE	Q9Y314|NOSIP_HUMAN	133.015	3	3	12	8	16	18	11	16	0.666667	1.125	1.45455		33172	Nitric oxide synthase-interacting protein OS=Homo sapiens OX=9606 GN=NOSIP PE=1 SV=1
2775	TRUE	Q14790|CASP8_HUMAN	176.833	6	6	22	27	16	17	22	32	1.22727	1.0625	1.45455	Carbamidomethylation	55391.1	Caspase-8 OS=Homo sapiens OX=9606 GN=CASP8 PE=1 SV=1
2961	TRUE	Q92636|FAN_HUMAN	166.87	4	4	20	17	11	6	11	16	0.85	0.545455	1.45455		104372	Protein FAN OS=Homo sapiens OX=9606 GN=NSMAF PE=1 SV=2
2916	TRUE	Q9GZN8|CT027_HUMAN	169.071	4	4	37	44	8		20	29	1.18919	0.125	1.45	Carbamidomethylation	19291	UPF0687 protein C20orf27 OS=Homo sapiens OX=9606 GN=C20orf27 PE=1 SV=3
2621	TRUE	Q9BTW9|TBCD_HUMAN	184.305	6	6	7	5	7	11	9	13	0.714286	1.57143	1.44444		132600	Tubulin-specific chaperone D OS=Homo sapiens OX=9606 GN=TBCD PE=1 SV=2
189	FALSE	Q5SRD0|WAC2D_HUMAN	246.719	11	3	38	34	26	37	27	39	0.894737	1.42308	1.44444		33372	WASH complex subunit 2D OS=Homo sapiens OX=9606 GN=WASHC2D PE=3 SV=2
2825	TRUE	P10301|RRAS_HUMAN	174.307	4	4	13	23	10	14	27	39	1.76923	1.4	1.44444		23480.5	Ras-related protein R-Ras OS=Homo sapiens OX=9606 GN=RRAS PE=1 SV=1
991	TRUE	P38117|ETFB_HUMAN	278.264	14	14	50	54	24	31	18	26	1.08	1.29167	1.44444	Carbamidomethylation; Oxidation (M)	27843.6	Electron transfer flavoprotein subunit beta OS=Homo sapiens OX=9606 GN=ETFB PE=1 SV=3
163	TRUE	Q5T1M5|FKB15_HUMAN	391.765	33	33	182	214	178	213	171	247	1.17582	1.19663	1.44444	Oxidation (M); Carbamidomethylation	133630	FK506-binding protein 15 OS=Homo sapiens OX=9606 GN=FKBP15 PE=1 SV=2
1057	TRUE	P08240|SRPRA_HUMAN	273.071	17	17	53	74	43	52	43	62	1.39623	1.2093	1.44186	Oxidation (M); Carbamidomethylation	69811.2	Signal recognition particle receptor subunit alpha OS=Homo sapiens OX=9606 GN=SRPRA PE=1 SV=2
1002	TRUE	Q6ZMI0|PPR21_HUMAN	277.397	16	16	31	31	35	38	32	46	1	1.08571	1.4375	Carbamidomethylation; Oxidation (M)	88314.5	Protein phosphatase 1 regulatory subunit 21 OS=Homo sapiens OX=9606 GN=PPP1R21 PE=1 SV=1
2791	TRUE	Q8WU79|SMAP2_HUMAN	176.124	5	5	26	29	29	23	16	23	1.11538	0.793103	1.4375	Oxidation (M); Carbamidomethylation	46785.9	Stromal membrane-associated protein 2 OS=Homo sapiens OX=9606 GN=SMAP2 PE=1 SV=1
2324	TRUE	O75592|MYCB2_HUMAN	198.546	8	8	14	23	4	3	16	23	1.64286	0.75	1.4375	Carbamidomethylation	513636	E3 ubiquitin-protein ligase MYCBP2 OS=Homo sapiens OX=9606 GN=MYCBP2 PE=1 SV=4
4312	TRUE	P26447|S10A4_HUMAN	103.14	2	2	75	68	68	38	39	56	0.906667	0.558824	1.4359	Oxidation (M)	11728.5	Protein S100-A4 OS=Homo sapiens OX=9606 GN=S100A4 PE=1 SV=1
953	TRUE	Q13153|PAK1_HUMAN	280.682	14	9	42	61	43	57	62	89	1.45238	1.32558	1.43548	Oxidation (M); Carbamidomethylation	60646.9	Serine/threonine-protein kinase PAK 1 OS=Homo sapiens OX=9606 GN=PAK1 PE=1 SV=2
1273	TRUE	Q9Y6G9|DC1L1_HUMAN	256.984	14	13	57	57	36	51	46	66	1	1.41667	1.43478	Carbamidomethylation; Oxidation (M)	56579.1	Cytoplasmic dynein 1 light intermediate chain 1 OS=Homo sapiens OX=9606 GN=DYNC1LI1 PE=1 SV=3
1539	TRUE	Q14344|GNA13_HUMAN	239.989	10	9	41	44	30	35	30	43	1.07317	1.16667	1.43333	Carbamidomethylation	44049.6	Guanine nucleotide-binding protein subunit alpha-13 OS=Homo sapiens OX=9606 GN=GNA13 PE=1 SV=2
662	TRUE	P25787|PSA2_HUMAN	309.321	11	11	44	55	58	113	81	116	1.25	1.94828	1.4321	Oxidation (M); Carbamidomethylation	25898.6	Proteasome subunit alpha type-2 OS=Homo sapiens OX=9606 GN=PSMA2 PE=1 SV=2
4280	TRUE	Q13951|PEBB_HUMAN	105.433	3	3				3	7	10		3	1.42857		21508.1	Core-binding factor subunit beta OS=Homo sapiens OX=9606 GN=CBFB PE=1 SV=2
2617	TRUE	Q8WXI9|P66B_HUMAN	184.384	5	4	12	11	3	8	7	10	0.916667	2.66667	1.42857		65260.7	Transcriptional repressor p66-beta OS=Homo sapiens OX=9606 GN=GATAD2B PE=1 SV=1
3274	TRUE	P04424|ARLY_HUMAN	150.899	3	3	5	7	9	12	7	10	1.4	1.33333	1.42857	Oxidation (M)	51658	Argininosuccinate lyase OS=Homo sapiens OX=9606 GN=ASL PE=1 SV=4
3845	TRUE	Q9HC21|TPC_HUMAN	124.741	3	3	11	10	9	10	7	10	0.909091	1.11111	1.42857		35511.1	Mitochondrial thiamine pyrophosphate carrier OS=Homo sapiens OX=9606 GN=SLC25A19 PE=1 SV=1
2183	TRUE	P22830|HEMH_HUMAN	205.766	6	6	23	19	9	9	14	20	0.826087	1	1.42857	Carbamidomethylation	47862.2	Ferrochelatase, mitochondrial OS=Homo sapiens OX=9606 GN=FECH PE=1 SV=2
3582	TRUE	Q00059|TFAM_HUMAN	136.931	4	4	11	7	11	11	7	10	0.636364	1	1.42857	Oxidation (M)	29096.6	Transcription factor A, mitochondrial OS=Homo sapiens OX=9606 GN=TFAM PE=1 SV=1
2022	FALSE	Q969R2|OSBP2_HUMAN	78.443	1	1	5	3	8	8	7	10	0.6	1	1.42857	Oxidation (M)	101266	Oxysterol-binding protein 2 OS=Homo sapiens OX=9606 GN=OSBP2 PE=1 SV=2
3099	TRUE	Q92643|GPI8_HUMAN	160.193	4	4	11	13	12	11	14	20	1.18182	0.916667	1.42857		45251.8	GPI-anchor transamidase OS=Homo sapiens OX=9606 GN=PIGK PE=1 SV=2
3566	TRUE	Q9NW68|BSDC1_HUMAN	137.566	3	3	5	11	11	8	7	10	2.2	0.727273	1.42857		47163.2	BSD domain-containing protein 1 OS=Homo sapiens OX=9606 GN=BSDC1 PE=1 SV=1
3531	TRUE	Q9Y5T5|UBP16_HUMAN	138.876	4	4	10	11	3	1	7	10	1.1	0.333333	1.42857	Carbamidomethylation	93570.1	Ubiquitin carboxyl-terminal hydrolase 16 OS=Homo sapiens OX=9606 GN=USP16 PE=1 SV=1
3715	TRUE	Q5W0Z9|ZDH20_HUMAN	130.817	4	4					7	10			1.42857		42277.6	Palmitoyltransferase ZDHHC20 OS=Homo sapiens OX=9606 GN=ZDHHC20 PE=1 SV=1
800	TRUE	P00488|F13A_HUMAN	294.811	17	17	47	71	77	111	68	97	1.51064	1.44156	1.42647	Oxidation (M); Carbamidomethylation	83267.3	Coagulation factor XIII A chain OS=Homo sapiens OX=9606 GN=F13A1 PE=1 SV=4
987	TRUE	Q9Y2D5|AKAP2_HUMAN	278.387	16	16	28	42	32	40	54	77	1.5	1.25	1.42593	Carbamidomethylation; Oxidation (M)	94660.5	A-kinase anchor protein 2 OS=Homo sapiens OX=9606 GN=AKAP2 PE=1 SV=3
2248	TRUE	Q9UID3|VPS51_HUMAN	202.405	7	7	18	18	14	19	19	27	1	1.35714	1.42105	Carbamidomethylation; Oxidation (M)	86042.3	Vacuolar protein sorting-associated protein 51 homolog OS=Homo sapiens OX=9606 GN=VPS51 PE=1 SV=2
437	TRUE	Q9NQT8|KI13B_HUMAN	336.651	29	26	82	112	76	99	76	108	1.36585	1.30263	1.42105	Carbamidomethylation; Oxidation (M)	202789	Kinesin-like protein KIF13B OS=Homo sapiens OX=9606 GN=KIF13B PE=1 SV=2
1466	TRUE	Q9BZZ5|API5_HUMAN	245.21	13	13	42	39	30	33	38	54	0.928571	1.1	1.42105	Carbamidomethylation; Oxidation (M)	59004.6	Apoptosis inhibitor 5 OS=Homo sapiens OX=9606 GN=API5 PE=1 SV=3
2064	TRUE	Q8IUI8|CRLF3_HUMAN	211.989	7	7	12	11	15	16	19	27	0.916667	1.06667	1.42105	Oxidation (M); Carbamidomethylation	49765.9	Cytokine receptor-like factor 3 OS=Homo sapiens OX=9606 GN=CRLF3 PE=1 SV=2
1835	TRUE	O75064|DEN4B_HUMAN	223.709	9	9	21	22	12	6	31	44	1.04762	0.5	1.41935	Carbamidomethylation	163847	DENN domain-containing protein 4B OS=Homo sapiens OX=9606 GN=DENND4B PE=1 SV=4
1551	TRUE	O94903|PLPHP_HUMAN	239.18	8	8	63	65	57	87	67	95	1.03175	1.52632	1.41791	Carbamidomethylation; Oxidation (M)	30343.9	Pyridoxal phosphate homeostasis protein OS=Homo sapiens OX=9606 GN=PLPBP PE=1 SV=1
3730	TRUE	Q14061|COX17_HUMAN	130.201	2	2	13	18	8	10	12	17	1.38462	1.25	1.41667		6915.1	Cytochrome c oxidase copper chaperone OS=Homo sapiens OX=9606 GN=COX17 PE=1 SV=2
2266	TRUE	Q96Q05|TPPC9_HUMAN	201.521	10	10	17	17	12	11	12	17	1	0.916667	1.41667	Carbamidomethylation	128530	Trafficking protein particle complex subunit 9 OS=Homo sapiens OX=9606 GN=TRAPPC9 PE=1 SV=2
3967	TRUE	Q712K3|UB2R2_HUMAN	119.23	3	3	18	15	14	9	12	17	0.833333	0.642857	1.41667	Carbamidomethylation	27166	Ubiquitin-conjugating enzyme E2 R2 OS=Homo sapiens OX=9606 GN=UBE2R2 PE=1 SV=1
2517	TRUE	Q6Y288|B3GLT_HUMAN	189.271	5	5	18	18	21	13	12	17	1	0.619048	1.41667		56563.9	Beta-1,3-glucosyltransferase OS=Homo sapiens OX=9606 GN=B3GLCT PE=1 SV=2
2178	TRUE	Q8WXX5|DNJC9_HUMAN	205.965	8	8	19	19	24	11	12	17	1	0.458333	1.41667	Oxidation (M); Carbamidomethylation	29909.7	DnaJ homolog subfamily C member 9 OS=Homo sapiens OX=9606 GN=DNAJC9 PE=1 SV=1
1960	TRUE	P78406|RAE1L_HUMAN	217.082	7	7	16	17	9	4	12	17	1.0625	0.444444	1.41667	Carbamidomethylation; Oxidation (M)	40968.2	mRNA export factor OS=Homo sapiens OX=9606 GN=RAE1 PE=1 SV=1
753	TRUE	Q14258|TRI25_HUMAN	299.596	20	20	52	71	57	71	58	82	1.36538	1.24561	1.41379	Carbamidomethylation; Oxidation (M)	70973.4	E3 ubiquitin/ISG15 ligase TRIM25 OS=Homo sapiens OX=9606 GN=TRIM25 PE=1 SV=2
936	TRUE	P13929|ENOB_HUMAN	282.56	12	2	135	100	200	180	179	253	0.740741	0.9	1.41341	Carbamidomethylation; Oxidation (M)	46986.9	Beta-enolase OS=Homo sapiens OX=9606 GN=ENO3 PE=1 SV=5
1223	TRUE	Q14966|ZN638_HUMAN	260.72	21	21	65	63	14	25	34	48	0.969231	1.78571	1.41176	Oxidation (M); Carbamidomethylation	220625	Zinc finger protein 638 OS=Homo sapiens OX=9606 GN=ZNF638 PE=1 SV=2
3213	TRUE	Q8WWY3|PRP31_HUMAN	154.884	5	5	8	16	9	11	17	24	2	1.22222	1.41176	Oxidation (M)	55456	U4/U6 small nuclear ribonucleoprotein Prp31 OS=Homo sapiens OX=9606 GN=PRPF31 PE=1 SV=2
2898	TRUE	Q9NPL8|TIDC1_HUMAN	170.474	5	5	15	15	18	20	17	24	1	1.11111	1.41176		32177.7	Complex I assembly factor TIMMDC1, mitochondrial OS=Homo sapiens OX=9606 GN=TIMMDC1 PE=1 SV=2
1414	TRUE	P26583|HMGB2_HUMAN	248.483	8	6	31	48	78	67	39	55	1.54839	0.858974	1.41026	Oxidation (M); Carbamidomethylation	24033.7	High mobility group protein B2 OS=Homo sapiens OX=9606 GN=HMGB2 PE=1 SV=2
3029	TRUE	P48556|PSMD8_HUMAN	163.784	4	4	22	27	21	13	22	31	1.22727	0.619048	1.40909	Oxidation (M)	39611.9	26S proteasome non-ATPase regulatory subunit 8 OS=Homo sapiens OX=9606 GN=PSMD8 PE=1 SV=2
1184	TRUE	P43353|AL3B1_HUMAN	263.825	11	10	12	15	33	19	22	31	1.25	0.575758	1.40909	Carbamidomethylation	51839.7	Aldehyde dehydrogenase family 3 member B1 OS=Homo sapiens OX=9606 GN=ALDH3B1 PE=1 SV=1
2039	TRUE	P15104|GLNA_HUMAN	212.966	6	6	17	41	9	21	32	45	2.41176	2.33333	1.40625	Carbamidomethylation; Oxidation (M)	42064.4	Glutamine synthetase OS=Homo sapiens OX=9606 GN=GLUL PE=1 SV=4
1214	TRUE	P32121|ARRB2_HUMAN	261.488	11	11	22	19	21	30	32	45	0.863636	1.42857	1.40625	Carbamidomethylation	46105.8	Beta-arrestin-2 OS=Homo sapiens OX=9606 GN=ARRB2 PE=1 SV=2
1195	TRUE	P36507|MP2K2_HUMAN	262.832	11	8	33	47	40	48	32	45	1.42424	1.2	1.40625	Carbamidomethylation; Oxidation (M)	44424.1	Dual specificity mitogen-activated protein kinase kinase 2 OS=Homo sapiens OX=9606 GN=MAP2K2 PE=1 SV=1
282	TRUE	Q9Y2J2|E41L3_HUMAN	362.446	32	28	88	85	82	108	111	156	0.965909	1.31707	1.40541	Oxidation (M); Carbamidomethylation	120678	Band 4.1-like protein 3 OS=Homo sapiens OX=9606 GN=EPB41L3 PE=1 SV=2
980	TRUE	Q92835|SHIP1_HUMAN	278.805	17	16	59	57	42	56	42	59	0.966102	1.33333	1.40476	Carbamidomethylation; Oxidation (M)	133292	Phosphatidylinositol 3,4,5-trisphosphate 5-phosphatase 1 OS=Homo sapiens OX=9606 GN=INPP5D PE=1 SV=2
970	TRUE	Q6NZY4|ZCHC8_HUMAN	279.484	16	16	37	41	30	35	52	73	1.10811	1.16667	1.40385	Oxidation (M); Carbamidomethylation	78577.4	Zinc finger CCHC domain-containing protein 8 OS=Homo sapiens OX=9606 GN=ZCCHC8 PE=1 SV=2
207	TRUE	P43490|NAMPT_HUMAN	380.383	26	26	173	246	159	258	231	324	1.42197	1.62264	1.4026	Carbamidomethylation; Oxidation (M)	55521.2	Nicotinamide phosphoribosyltransferase OS=Homo sapiens OX=9606 GN=NAMPT PE=1 SV=1
3785	TRUE	Q9NZK5|ADA2_HUMAN	127.403	3	3	3	8		6	5	7	2.66667	6	1.4	Carbamidomethylation	58933.6	Adenosine deaminase 2 OS=Homo sapiens OX=9606 GN=ADA2 PE=1 SV=2
4048	TRUE	Q15528|MED22_HUMAN	116.105	3	3			1	5	5	7		5	1.4		22220.7	Mediator of RNA polymerase II transcription subunit 22 OS=Homo sapiens OX=9606 GN=MED22 PE=1 SV=2
3300	TRUE	Q12959|DLG1_HUMAN	149.864	5	5	10	10	6	13	5	7	1	2.16667	1.4	Carbamidomethylation	100455	Disks large homolog 1 OS=Homo sapiens OX=9606 GN=DLG1 PE=1 SV=2
3372	TRUE	O75391|SPAG7_HUMAN	146.675	4	4	5	4	7	10	5	7	0.8	1.42857	1.4		26034.4	Sperm-associated antigen 7 OS=Homo sapiens OX=9606 GN=SPAG7 PE=1 SV=2
1462	TRUE	Q9Y6K5|OAS3_HUMAN	245.562	13	13	28	34	28	36	20	28	1.21429	1.28571	1.4	Carbamidomethylation; Oxidation (M)	121170	2'-5'-oligoadenylate synthase 3 OS=Homo sapiens OX=9606 GN=OAS3 PE=1 SV=3
2890	TRUE	Q96C86|DCPS_HUMAN	171.163	3	3	13	16	9	11	15	21	1.23077	1.22222	1.4		38608.8	m7GpppX diphosphatase OS=Homo sapiens OX=9606 GN=DCPS PE=1 SV=2
3462	TRUE	Q9NXH8|TOR4A_HUMAN	141.911	3	3	2	6	6	7	5	7	3	1.16667	1.4		46914.1	Torsin-4A OS=Homo sapiens OX=9606 GN=TOR4A PE=1 SV=2
4090	TRUE	O43299|AP5Z1_HUMAN	114.353	3	3	4	7	7	7	5	7	1.75	1	1.4		88605.2	AP-5 complex subunit zeta-1 OS=Homo sapiens OX=9606 GN=AP5Z1 PE=1 SV=2
1793	TRUE	Q15007|FL2D_HUMAN	225.674	11	11	18	38	23	19	30	42	2.11111	0.826087	1.4	Carbamidomethylation; Oxidation (M)	44243.6	Pre-mRNA-splicing regulator WTAP OS=Homo sapiens OX=9606 GN=WTAP PE=1 SV=2
4079	TRUE	Q6NXE6|ARMC6_HUMAN	114.766	2	2	4	7	13	10	10	14	1.75	0.769231	1.4		54141.9	Armadillo repeat-containing protein 6 OS=Homo sapiens OX=9606 GN=ARMC6 PE=1 SV=2
4527	TRUE	O14569|C56D2_HUMAN	92.4159	2	2	5	8	4	3	5	7	1.6	0.75	1.4		23973.7	Cytochrome b561 domain-containing protein 2 OS=Homo sapiens OX=9606 GN=CYB561D2 PE=1 SV=1
3339	TRUE	Q14331|FRG1_HUMAN	148.355	4	4	8	15	11	8	15	21	1.875	0.727273	1.4		29172.4	Protein FRG1 OS=Homo sapiens OX=9606 GN=FRG1 PE=1 SV=1
5162	TRUE	P62312|LSM6_HUMAN	65.4313	1	1	2	2	7	5	5	7	1	0.714286	1.4		9127.57	U6 snRNA-associated Sm-like protein LSm6 OS=Homo sapiens OX=9606 GN=LSM6 PE=1 SV=1
4155	TRUE	Q6ZMZ3|SYNE3_HUMAN	111.085	2	2	4	4	7	5	5	7	1	0.714286	1.4		112216	Nesprin-3 OS=Homo sapiens OX=9606 GN=SYNE3 PE=1 SV=2
4294	TRUE	Q69YN2|C19L1_HUMAN	104.614	5	5	4	7	3	2	5	7	1.75	0.666667	1.4	Carbamidomethylation	60619.1	CWF19-like protein 1 OS=Homo sapiens OX=9606 GN=CWF19L1 PE=1 SV=2
3565	TRUE	Q6P1J9|CDC73_HUMAN	137.664	7	7	6	4	2	1	5	7	0.666667	0.5	1.4	Oxidation (M)	60576.6	Parafibromin OS=Homo sapiens OX=9606 GN=CDC73 PE=1 SV=1
4343	TRUE	P02771|FETA_HUMAN	101.428	2	2	3	2	4	2	5	7	0.666667	0.5	1.4		68677.6	Alpha-fetoprotein OS=Homo sapiens OX=9606 GN=AFP PE=1 SV=1
5021	TRUE	Q9ULJ8|NEB1_HUMAN	70.9523	2	1	5	3	7	2	5	7	0.6	0.285714	1.4		123342	Neurabin-1 OS=Homo sapiens OX=9606 GN=PPP1R9A PE=1 SV=2
3663	TRUE	Q03426|KIME_HUMAN	132.994	4	4	1	3	15	4	5	7	3	0.266667	1.4	Carbamidomethylation	42450.9	Mevalonate kinase OS=Homo sapiens OX=9606 GN=MVK PE=1 SV=1
4679	TRUE	P13987|CD59_HUMAN	85.954	1	1	1	3	4		5	7	3	0.25	1.4	Carbamidomethylation	14177.3	CD59 glycoprotein OS=Homo sapiens OX=9606 GN=CD59 PE=1 SV=1
4403	TRUE	Q9GZT4|SRR_HUMAN	99.0335	2	2	5	5			5	7	1		1.4	Carbamidomethylation	36566.2	Serine racemase OS=Homo sapiens OX=9606 GN=SRR PE=1 SV=1
5017	TRUE	Q96B02|UBE2W_HUMAN	71.0357	1	1	4	2			5	7	0.5		1.4	Oxidation (M)	17330.9	Ubiquitin-conjugating enzyme E2 W OS=Homo sapiens OX=9606 GN=UBE2W PE=1 SV=1
61	TRUE	Q96KP4|CNDP2_HUMAN	451.926	38	38	444	490	486	550	449	625	1.1036	1.13169	1.39198	Oxidation (M); Carbamidomethylation	52878.5	Cytosolic non-specific dipeptidase OS=Homo sapiens OX=9606 GN=CNDP2 PE=1 SV=2
942	TRUE	Q02750|MP2K1_HUMAN	282.188	13	10	49	56	61	59	41	57	1.14286	0.967213	1.39024	Carbamidomethylation; Oxidation (M)	43439	Dual specificity mitogen-activated protein kinase kinase 1 OS=Homo sapiens OX=9606 GN=MAP2K1 PE=1 SV=2
2628	TRUE	Q8NC56|LEMD2_HUMAN	183.991	7	7	15	20	10	14	18	25	1.33333	1.4	1.38889	Oxidation (M); Carbamidomethylation	56975.2	LEM domain-containing protein 2 OS=Homo sapiens OX=9606 GN=LEMD2 PE=1 SV=1
1565	TRUE	Q96EP0|RNF31_HUMAN	238.506	10	10	17	25	10	11	18	25	1.47059	1.1	1.38889	Carbamidomethylation	119652	E3 ubiquitin-protein ligase RNF31 OS=Homo sapiens OX=9606 GN=RNF31 PE=1 SV=1
2198	TRUE	Q9BRQ8|FSP1_HUMAN	205.198	7	7	24	31	24	26	18	25	1.29167	1.08333	1.38889	Oxidation (M); Carbamidomethylation	40526.7	Ferroptosis suppressor protein 1 OS=Homo sapiens OX=9606 GN=AIFM2 PE=1 SV=1
3357	TRUE	O00541|PESC_HUMAN	147.628	4	4	13	16	4	10	13	18	1.23077	2.5	1.38462	Carbamidomethylation; Oxidation (M)	68002.6	Pescadillo homolog OS=Homo sapiens OX=9606 GN=PES1 PE=1 SV=1
4081	TRUE	Q9BZI7|REN3B_HUMAN	114.64	4	4		3		1	13	18	3	1	1.38462	Oxidation (M)	57762	Regulator of nonsense transcripts 3B OS=Homo sapiens OX=9606 GN=UPF3B PE=1 SV=1
3110	TRUE	Q16186|ADRM1_HUMAN	159.817	5	5	14	15	15	15	13	18	1.07143	1	1.38462	Carbamidomethylation	42153.3	Proteasomal ubiquitin receptor ADRM1 OS=Homo sapiens OX=9606 GN=ADRM1 PE=1 SV=2
1362	TRUE	Q9NVS9|PNPO_HUMAN	251.742	10	10	47	44	39	35	26	36	0.93617	0.897436	1.38462		29988	Pyridoxine-5'-phosphate oxidase OS=Homo sapiens OX=9606 GN=PNPO PE=1 SV=1
1703	TRUE	Q99614|TTC1_HUMAN	230.98	8	8	25	29	32	19	26	36	1.16	0.59375	1.38462	Carbamidomethylation	33526.1	Tetratricopeptide repeat protein 1 OS=Homo sapiens OX=9606 GN=TTC1 PE=1 SV=1
1826	TRUE	P10599|THIO_HUMAN	224.04	8	8	136	175	84	98	73	101	1.28676	1.16667	1.38356	Carbamidomethylation; Oxidation (M)	11737.5	Thioredoxin OS=Homo sapiens OX=9606 GN=TXN PE=1 SV=3
883	TRUE	Q14677|EPN4_HUMAN	287.248	14	14	57	60	45	45	42	58	1.05263	1	1.38095	Oxidation (M)	68259.4	Clathrin interactor 1 OS=Homo sapiens OX=9606 GN=CLINT1 PE=1 SV=1
2211	TRUE	P01116|RASK_HUMAN	204.505	8	2	43	44	35	33	42	58	1.02326	0.942857	1.38095	Oxidation (M); Carbamidomethylation	21655.8	GTPase KRas OS=Homo sapiens OX=9606 GN=KRAS PE=1 SV=1
1851	TRUE	Q7Z3D6|GLUCM_HUMAN	223.051	8	8	29	24	19	31	29	40	0.827586	1.63158	1.37931	Carbamidomethylation; Oxidation (M)	66436.6	D-glutamate cyclase, mitochondrial OS=Homo sapiens OX=9606 GN=DGLUCY PE=1 SV=2
3220	FALSE	P13164|IFM1_HUMAN	85.4338	1	1	7	6		3	8	11	0.857143	3	1.375	Oxidation (M)	13964.5	Interferon-induced transmembrane protein 1 OS=Homo sapiens OX=9606 GN=IFITM1 PE=1 SV=3
3220	FALSE	Q01629|IFM2_HUMAN	85.4338	1	1	7	6		3	8	11	0.857143	3	1.375	Oxidation (M)	14632.2	Interferon-induced transmembrane protein 2 OS=Homo sapiens OX=9606 GN=IFITM2 PE=1 SV=2
2752	TRUE	Q92844|TANK_HUMAN	178.439	7	7	11	19	14	16	16	22	1.72727	1.14286	1.375	Carbamidomethylation	47815.7	TRAF family member-associated NF-kappa-B activator OS=Homo sapiens OX=9606 GN=TANK PE=1 SV=2
4952	TRUE	Q9UBP6|TRMB_HUMAN	73.8315	1	1		8	2	2	8	11	8	1	1.375		31471	tRNA (guanine-N(7)-)-methyltransferase OS=Homo sapiens OX=9606 GN=METTL1 PE=1 SV=1
3381	TRUE	Q8IZQ5|SELH_HUMAN	146.087	3	3	15	21	8	8	8	11	1.4	1	1.375		13422.3	Selenoprotein H OS=Homo sapiens OX=9606 GN=SELENOH PE=1 SV=2
3884	TRUE	Q9NP92|RT30_HUMAN	122.584	3	3	11	14	13	13	8	11	1.27273	1	1.375		50364.7	39S ribosomal protein S30, mitochondrial OS=Homo sapiens OX=9606 GN=MRPS30 PE=1 SV=2
2080	TRUE	P23219|PGH1_HUMAN	211.203	7	7	25	30	9	7	8	11	1.2	0.777778	1.375	Carbamidomethylation	68686.4	Prostaglandin G/H synthase 1 OS=Homo sapiens OX=9606 GN=PTGS1 PE=1 SV=2
1642	TRUE	O43914|TYOBP_HUMAN	234.323	9	9	32	32	37	28	24	33	1	0.756757	1.375		12179.1	TYRO protein tyrosine kinase-binding protein OS=Homo sapiens OX=9606 GN=TYROBP PE=1 SV=1
2044	TRUE	Q9NZ52|GGA3_HUMAN	212.883	9	9	17	23	24	15	8	11	1.35294	0.625	1.375	Carbamidomethylation	78315.3	ADP-ribosylation factor-binding protein GGA3 OS=Homo sapiens OX=9606 GN=GGA3 PE=1 SV=1
2300	TRUE	Q6UWE0|LRSM1_HUMAN	199.587	8	8	7	9	8	4	16	22	1.28571	0.5	1.375	Oxidation (M)	83593.9	E3 ubiquitin-protein ligase LRSAM1 OS=Homo sapiens OX=9606 GN=LRSAM1 PE=1 SV=1
3934	TRUE	O43805|SSNA1_HUMAN	120.618	3	3	3	2	5	2	8	11	0.666667	0.4	1.375		13596.2	Sjoegren syndrome nuclear autoantigen 1 OS=Homo sapiens OX=9606 GN=SSNA1 PE=1 SV=2
3006	TRUE	Q96NT0|CC115_HUMAN	164.891	4	4	14	11	6		8	11	0.785714	0.166667	1.375	Carbamidomethylation	19760.5	Coiled-coil domain-containing protein 115 OS=Homo sapiens OX=9606 GN=CCDC115 PE=1 SV=1
1294	TRUE	P61225|RAP2B_HUMAN	255.971	10	5	91	83	74	93	62	85	0.912088	1.25676	1.37097	Carbamidomethylation; Oxidation (M)	20504.4	Ras-related protein Rap-2b OS=Homo sapiens OX=9606 GN=RAP2B PE=1 SV=1
3088	TRUE	Q9UFG5|CS025_HUMAN	160.702	3	3		11		8	19	26	11	8	1.36842	Oxidation (M)	12877.6	UPF0449 protein C19orf25 OS=Homo sapiens OX=9606 GN=C19orf25 PE=1 SV=2
2174	TRUE	P05161|ISG15_HUMAN	206.041	6	6	10	13	1	3	19	26	1.3	3	1.36842	Carbamidomethylation	17887.5	Ubiquitin-like protein ISG15 OS=Homo sapiens OX=9606 GN=ISG15 PE=1 SV=5
261	TRUE	P30740|ILEU_HUMAN	367.619	19	18	169	193	159	165	190	260	1.14201	1.03774	1.36842	Oxidation (M); Carbamidomethylation	42741.8	Leukocyte elastase inhibitor OS=Homo sapiens OX=9606 GN=SERPINB1 PE=1 SV=1
2025	TRUE	Q15080|NCF4_HUMAN	214.026	9	9	25	33	23	36	33	45	1.32	1.56522	1.36364	Carbamidomethylation; Oxidation (M)	39031.7	Neutrophil cytosol factor 4 OS=Homo sapiens OX=9606 GN=NCF4 PE=1 SV=2
2790	TRUE	P35611|ADDA_HUMAN	176.142	5	5	12	9	16	17	11	15	0.75	1.0625	1.36364	Carbamidomethylation; Oxidation (M)	80955.1	Alpha-adducin OS=Homo sapiens OX=9606 GN=ADD1 PE=1 SV=2
3167	TRUE	P25398|RS12_HUMAN	157.139	4	4	37	41	4	4	11	15	1.10811	1	1.36364	Carbamidomethylation	14514.9	40S ribosomal protein S12 OS=Homo sapiens OX=9606 GN=RPS12 PE=1 SV=3
3192	TRUE	P49356|FNTB_HUMAN	155.936	5	5	14	16	16	14	11	15	1.14286	0.875	1.36364		48773.6	Protein farnesyltransferase subunit beta OS=Homo sapiens OX=9606 GN=FNTB PE=1 SV=1
2710	TRUE	Q9UJY4|GGA2_HUMAN	180.523	5	5	9	8	5	4	11	15	0.888889	0.8	1.36364		67150.3	ADP-ribosylation factor-binding protein GGA2 OS=Homo sapiens OX=9606 GN=GGA2 PE=1 SV=3
3532	TRUE	P49137|MAPK2_HUMAN	138.855	5	4	13	14	17		22	30	1.07692	0.0588235	1.36364	Carbamidomethylation; Oxidation (M)	45567.8	MAP kinase-activated protein kinase 2 OS=Homo sapiens OX=9606 GN=MAPKAPK2 PE=1 SV=1
985	TRUE	P07205|PGK2_HUMAN	278.534	10	1	121	110	74	79	94	128	0.909091	1.06757	1.3617	Oxidation (M)	44796.1	Phosphoglycerate kinase 2 OS=Homo sapiens OX=9606 GN=PGK2 PE=1 SV=3
1757	TRUE	O95219|SNX4_HUMAN	228.21	10	10	14	20	3	4	25	34	1.42857	1.33333	1.36	Carbamidomethylation	51908.8	Sorting nexin-4 OS=Homo sapiens OX=9606 GN=SNX4 PE=1 SV=1
2424	TRUE	O75477|ERLN1_HUMAN	193.846	9	6	30	52	23	28	25	34	1.73333	1.21739	1.36	Oxidation (M); Carbamidomethylation	39171.1	Erlin-1 OS=Homo sapiens OX=9606 GN=ERLIN1 PE=1 SV=2
1102	TRUE	P53367|ARFP1_HUMAN	270.131	13	13	32	27	41	34	25	34	0.84375	0.829268	1.36	Oxidation (M)	41738.3	Arfaptin-1 OS=Homo sapiens OX=9606 GN=ARFIP1 PE=1 SV=2
2692	TRUE	Q53QZ3|RHG15_HUMAN	181.259	5	5	19	12	6	11	14	19	0.631579	1.83333	1.35714		54544.5	Rho GTPase-activating protein 15 OS=Homo sapiens OX=9606 GN=ARHGAP15 PE=1 SV=2
2582	TRUE	O15231|ZN185_HUMAN	185.768	7	7	5	5	9	14	14	19	1	1.55556	1.35714	Carbamidomethylation; Oxidation (M)	73525.4	Zinc finger protein 185 OS=Homo sapiens OX=9606 GN=ZNF185 PE=1 SV=3
3208	TRUE	P54619|AAKG1_HUMAN	155.087	4	4	10	15	3	4	14	19	1.5	1.33333	1.35714		37579.4	5'-AMP-activated protein kinase subunit gamma-1 OS=Homo sapiens OX=9606 GN=PRKAG1 PE=1 SV=1
1786	TRUE	Q9NZZ3|CHMP5_HUMAN	226.148	8	8	43	54	51	52	56	76	1.25581	1.01961	1.35714	Carbamidomethylation; Oxidation (M)	24570.7	Charged multivesicular body protein 5 OS=Homo sapiens OX=9606 GN=CHMP5 PE=1 SV=1
1801	TRUE	Q9NX46|ADPRS_HUMAN	225.164	11	11	16	20	27	24	42	57	1.25	0.888889	1.35714	Carbamidomethylation; Oxidation (M)	38946.7	ADP-ribose glycohydrolase ARH3 OS=Homo sapiens OX=9606 GN=ADPRS PE=1 SV=1
2013	TRUE	P28676|GRAN_HUMAN	214.395	6	6	16	28	21	25	31	42	1.75	1.19048	1.35484	Carbamidomethylation; Oxidation (M)	24010	Grancalcin OS=Homo sapiens OX=9606 GN=GCA PE=1 SV=2
704	TRUE	P49589|SYCC_HUMAN	304.279	18	18	95	90	58	78	65	88	0.947368	1.34483	1.35385	Carbamidomethylation; Oxidation (M)	85473.3	Cysteine--tRNA ligase, cytoplasmic OS=Homo sapiens OX=9606 GN=CARS1 PE=1 SV=3
3059	TRUE	A0A1B0GUS4|UB2L5_HUMAN	161.986	4	1	18	19	29	34	17	23	1.05556	1.17241	1.35294	Carbamidomethylation	17875.5	Ubiquitin-conjugating enzyme E2 L5 OS=Homo sapiens OX=9606 GN=UBE2L5 PE=2 SV=1
507	TRUE	Q92608|DOCK2_HUMAN	328.58	32	32	47	67	40	53	105	142	1.42553	1.325	1.35238	Oxidation (M); Carbamidomethylation	211948	Dedicator of cytokinesis protein 2 OS=Homo sapiens OX=9606 GN=DOCK2 PE=1 SV=2
210	TRUE	P01889|HLAB_HUMAN	379.733	24	9	183	239	167	213	117	158	1.30601	1.27545	1.35043	Carbamidomethylation; Oxidation (M)	40460.1	HLA class I histocompatibility antigen, B alpha chain OS=Homo sapiens OX=9606 GN=HLA-B PE=1 SV=3
1216	TRUE	P15586|GNS_HUMAN	261.253	11	11	154	101	102	123	80	108	0.655844	1.20588	1.35	Oxidation (M); Carbamidomethylation	62082.1	N-acetylglucosamine-6-sulfatase OS=Homo sapiens OX=9606 GN=GNS PE=1 SV=3
2199	TRUE	P29218|IMPA1_HUMAN	205.121	7	7	32	22	27	27	20	27	0.6875	1	1.35	Carbamidomethylation	30188.8	Inositol monophosphatase 1 OS=Homo sapiens OX=9606 GN=IMPA1 PE=1 SV=1
1267	TRUE	O60861|GAS7_HUMAN	257.48	11	11	30	24	23	32	46	62	0.8	1.3913	1.34783	Carbamidomethylation; Oxidation (M)	54371.4	Growth arrest-specific protein 7 OS=Homo sapiens OX=9606 GN=GAS7 PE=1 SV=3
1665	TRUE	Q562E7|WDR81_HUMAN	232.846	14	14	19	16	15	19	26	35	0.842105	1.26667	1.34615	Carbamidomethylation; Oxidation (M)	211697	WD repeat-containing protein 81 OS=Homo sapiens OX=9606 GN=WDR81 PE=1 SV=2
2496	TRUE	Q8TBX8|PI42C_HUMAN	190.625	4	4	16	16	12	11	26	35	1	0.916667	1.34615	Oxidation (M)	47299.9	Phosphatidylinositol 5-phosphate 4-kinase type-2 gamma OS=Homo sapiens OX=9606 GN=PIP4K2C PE=1 SV=3
2418	TRUE	Q14558|KPRA_HUMAN	194.049	8	7	14	12	21	28	29	39	0.857143	1.33333	1.34483	Carbamidomethylation	39393.7	Phosphoribosyl pyrophosphate synthase-associated protein 1 OS=Homo sapiens OX=9606 GN=PRPSAP1 PE=1 SV=2
1584	TRUE	P33240|CSTF2_HUMAN	237.504	9	3	20	40	31	28	29	39	2	0.903226	1.34483	Carbamidomethylation; Oxidation (M)	60959.5	Cleavage stimulation factor subunit 2 OS=Homo sapiens OX=9606 GN=CSTF2 PE=1 SV=1
1309	TRUE	Q93034|CUL5_HUMAN	255.391	13	13	28	38	14	27	35	47	1.35714	1.92857	1.34286	Carbamidomethylation; Oxidation (M)	90955.3	Cullin-5 OS=Homo sapiens OX=9606 GN=CUL5 PE=1 SV=4
742	TRUE	Q9BT78|CSN4_HUMAN	301.174	18	18	69	66	62	59	70	94	0.956522	0.951613	1.34286	Oxidation (M); Carbamidomethylation	46268.8	COP9 signalosome complex subunit 4 OS=Homo sapiens OX=9606 GN=COPS4 PE=1 SV=1
1218	TRUE	O95571|ETHE1_HUMAN	261.055	12	12	30	29	43	72	47	63	0.966667	1.67442	1.34043	Carbamidomethylation; Oxidation (M)	27872.9	Persulfide dioxygenase ETHE1, mitochondrial OS=Homo sapiens OX=9606 GN=ETHE1 PE=1 SV=2
5337	TRUE	Q8IY37|DHX37_HUMAN	58.8978	1	1	1	3		3	3	4	3	3	1.33333		129545	Probable ATP-dependent RNA helicase DHX37 OS=Homo sapiens OX=9606 GN=DHX37 PE=1 SV=1
4147	TRUE	Q9Y4K3|TRAF6_HUMAN	111.566	2	2	5	14		3	6	8	2.8	3	1.33333	Carbamidomethylation	59573.1	TNF receptor-associated factor 6 OS=Homo sapiens OX=9606 GN=TRAF6 PE=1 SV=1
2902	TRUE	P09326|CD48_HUMAN	170.269	5	5	9	13	4	9	15	20	1.44444	2.25	1.33333	Carbamidomethylation; Oxidation (M)	27683.1	CD48 antigen OS=Homo sapiens OX=9606 GN=CD48 PE=1 SV=2
3489	TRUE	Q12981|SEC20_HUMAN	140.946	4	4	22	19	7	15	12	16	0.863636	2.14286	1.33333	Oxidation (M)	26132.4	Vesicle transport protein SEC20 OS=Homo sapiens OX=9606 GN=BNIP1 PE=1 SV=3
2482	TRUE	Q13287|NMI_HUMAN	191.246	7	7	16	23	11	23	21	28	1.4375	2.09091	1.33333	Carbamidomethylation; Oxidation (M)	35056.8	N-myc-interactor OS=Homo sapiens OX=9606 GN=NMI PE=1 SV=2
5188	TRUE	Q96A25|T106A_HUMAN	64.2512	1	1	2	4	1	2	3	4	2	2	1.33333		28920.3	Transmembrane protein 106A OS=Homo sapiens OX=9606 GN=TMEM106A PE=1 SV=1
3849	TRUE	Q96BW5|PTER_HUMAN	124.589	4	4	17	10	5	10	3	4	0.588235	2	1.33333		39017.9	Phosphotriesterase-related protein OS=Homo sapiens OX=9606 GN=PTER PE=1 SV=1
5692	TRUE	P59044|NLRP6_HUMAN	42.5331	1	1	3	1	2	4	3	4	0.333333	2	1.33333		98767.9	NACHT, LRR and PYD domains-containing protein 6 OS=Homo sapiens OX=9606 GN=NLRP6 PE=1 SV=2
3538	TRUE	Q9Y3C0|WASC3_HUMAN	138.581	3	3	15	14	8	15	6	8	0.933333	1.875	1.33333	Oxidation (M)	21172.7	WASH complex subunit 3 OS=Homo sapiens OX=9606 GN=WASHC3 PE=1 SV=1
4207	TRUE	Q9NQ50|RM40_HUMAN	108.54	3	3	10	10	6	11	3	4	1	1.83333	1.33333	Oxidation (M)	24490.4	39S ribosomal protein L40, mitochondrial OS=Homo sapiens OX=9606 GN=MRPL40 PE=1 SV=1
3119	TRUE	O60306|AQR_HUMAN	159.274	5	5	6	11	4	7	9	12	1.83333	1.75	1.33333	Oxidation (M)	171295	RNA helicase aquarius OS=Homo sapiens OX=9606 GN=AQR PE=1 SV=4
3570	TRUE	P56589|PEX3_HUMAN	137.438	3	3	16	12	4	7	9	12	0.75	1.75	1.33333	Carbamidomethylation	42139.8	Peroxisomal biogenesis factor 3 OS=Homo sapiens OX=9606 GN=PEX3 PE=1 SV=1
3855	TRUE	Q02447|SP3_HUMAN	124.218	2	2	10	5	4	7	9	12	0.5	1.75	1.33333		81925.3	Transcription factor Sp3 OS=Homo sapiens OX=9606 GN=SP3 PE=1 SV=3
1363	TRUE	O94919|ENDD1_HUMAN	251.691	10	10	35	43	25	43	33	44	1.22857	1.72	1.33333	Carbamidomethylation; Oxidation (M)	55016.6	Endonuclease domain-containing 1 protein OS=Homo sapiens OX=9606 GN=ENDOD1 PE=1 SV=2
4637	TRUE	P55212|CASP6_HUMAN	87.7065	2	2	3	5	3	5	6	8	1.66667	1.66667	1.33333		33310	Caspase-6 OS=Homo sapiens OX=9606 GN=CASP6 PE=1 SV=2
1065	FALSE	P28370|SMCA1_HUMAN	61.792	1	1	4	6	2	3	3	4	1.5	1.5	1.33333		122605	Probable global transcription activator SNF2L1 OS=Homo sapiens OX=9606 GN=SMARCA1 PE=1 SV=2
3393	TRUE	Q8N3X1|FNBP4_HUMAN	145.385	6	6	10	15	3	4	3	4	1.5	1.33333	1.33333	Carbamidomethylation	110266	Formin-binding protein 4 OS=Homo sapiens OX=9606 GN=FNBP4 PE=1 SV=3
3741	FALSE	O15198|SMAD9_HUMAN	99.7434	1	1	2		3	4	6	8	0.5	1.33333	1.33333		52493.4	Mothers against decapentaplegic homolog 9 OS=Homo sapiens OX=9606 GN=SMAD9 PE=1 SV=1
3741	FALSE	P84022|SMAD3_HUMAN	99.7434	1	1	2		3	4	6	8	0.5	1.33333	1.33333		48080.8	Mothers against decapentaplegic homolog 3 OS=Homo sapiens OX=9606 GN=SMAD3 PE=1 SV=1
1369	TRUE	O43493|TGON2_HUMAN	251.436	9	9	14	17	7	9	21	28	1.21429	1.28571	1.33333		45879.6	Trans-Golgi network integral membrane protein 2 OS=Homo sapiens OX=9606 GN=TGOLN2 PE=1 SV=4
603	TRUE	O60610|DIAP1_HUMAN	315.801	23	23	59	79	72	92	93	124	1.33898	1.27778	1.33333	Carbamidomethylation; Oxidation (M)	141347	Protein diaphanous homolog 1 OS=Homo sapiens OX=9606 GN=DIAPH1 PE=1 SV=2
1156	TRUE	Q6PKG0|LARP1_HUMAN	266.139	18	18	46	47	27	34	45	60	1.02174	1.25926	1.33333	Oxidation (M)	123510	La-related protein 1 OS=Homo sapiens OX=9606 GN=LARP1 PE=1 SV=2
4127	TRUE	Q96BR1|SGK3_HUMAN	112.554	2	2	4	3	7	8	3	4	0.75	1.14286	1.33333		57108.2	Serine/threonine-protein kinase Sgk3 OS=Homo sapiens OX=9606 GN=SGK3 PE=1 SV=1
1862	TRUE	Q9H2W6|RM46_HUMAN	222.231	10	10	43	44	27	30	21	28	1.02326	1.11111	1.33333	Oxidation (M)	31705.1	39S ribosomal protein L46, mitochondrial OS=Homo sapiens OX=9606 GN=MRPL46 PE=1 SV=1
4163	TRUE	Q9Y5U9|IR3IP_HUMAN	110.554	1	1	10	14	10	11	9	12	1.4	1.1	1.33333		8968.76	Immediate early response 3-interacting protein 1 OS=Homo sapiens OX=9606 GN=IER3IP1 PE=1 SV=1
1661	TRUE	Q9UPU7|TBD2B_HUMAN	233.084	14	14	12	15	11	12	24	32	1.25	1.09091	1.33333	Carbamidomethylation	109880	TBC1 domain family member 2B OS=Homo sapiens OX=9606 GN=TBC1D2B PE=1 SV=2
2682	TRUE	Q14019|COTL1_HUMAN	181.585	6	6	16	14	17	18	30	40	0.875	1.05882	1.33333	Carbamidomethylation	15945	Coactosin-like protein OS=Homo sapiens OX=9606 GN=COTL1 PE=1 SV=3
4404	TRUE	Q8TF42|UBS3B_HUMAN	99.0054	3	3	1	9	1	1	3	4	9	1	1.33333		72695.9	Ubiquitin-associated and SH3 domain-containing protein B OS=Homo sapiens OX=9606 GN=UBASH3B PE=1 SV=2
4795	TRUE	Q8NEF9|SRFB1_HUMAN	80.4886	3	3	2	5	1	1	6	8	2.5	1	1.33333		48633.9	Serum response factor-binding protein 1 OS=Homo sapiens OX=9606 GN=SRFBP1 PE=1 SV=1
3937	TRUE	Q6NYC1|JMJD6_HUMAN	120.556	2	2	2	4	5	5	3	4	2	1	1.33333		46462	Bifunctional arginine demethylase and lysyl-hydroxylase JMJD6 OS=Homo sapiens OX=9606 GN=JMJD6 PE=1 SV=1
4054	TRUE	Q6QNY0|BL1S3_HUMAN	115.886	2	2	4	6	6	6	3	4	1.5	1	1.33333		21255.6	Biogenesis of lysosome-related organelles complex 1 subunit 3 OS=Homo sapiens OX=9606 GN=BLOC1S3 PE=1 SV=1
2586	TRUE	P61009|SPCS3_HUMAN	185.558	6	6	14	19	14	14	15	20	1.35714	1	1.33333		20313.4	Signal peptidase complex subunit 3 OS=Homo sapiens OX=9606 GN=SPCS3 PE=1 SV=1
2152	TRUE	Q9H115|SNAB_HUMAN	207.232	5	2	26	28	5	5	27	36	1.07692	1	1.33333		33556.9	Beta-soluble NSF attachment protein OS=Homo sapiens OX=9606 GN=NAPB PE=1 SV=2
1477	TRUE	O75976|CBPD_HUMAN	244.351	10	10	33	34	4	4	3	4	1.0303	1	1.33333		152931	Carboxypeptidase D OS=Homo sapiens OX=9606 GN=CPD PE=1 SV=2
3822	TRUE	O43324|MCA3_HUMAN	125.889	3	3	6	5	17	17	6	8	0.833333	1	1.33333		19810.6	Eukaryotic translation elongation factor 1 epsilon-1 OS=Homo sapiens OX=9606 GN=EEF1E1 PE=1 SV=1
3654	TRUE	Q8IY67|RAVR1_HUMAN	133.315	4	4	4	3	8	8	3	4	0.75	1	1.33333		63877	Ribonucleoprotein PTB-binding 1 OS=Homo sapiens OX=9606 GN=RAVER1 PE=1 SV=1
3114	TRUE	Q13362|2A5G_HUMAN	159.639	7	4	12	9	15	13	12	16	0.75	0.866667	1.33333	Carbamidomethylation	61060.8	Serine/threonine-protein phosphatase 2A 56 kDa regulatory subunit gamma isoform OS=Homo sapiens OX=9606 GN=PPP2R5C PE=1 SV=3
3866	TRUE	Q9BZK3|NACP4_HUMAN	123.739	3	2	3	13	7	6	9	12	4.33333	0.857143	1.33333		23306	Putative nascent polypeptide-associated complex subunit alpha-like protein OS=Homo sapiens OX=9606 GN=NACA4P PE=5 SV=1
3137	TRUE	Q00577|PURA_HUMAN	158.556	3	3	12	2	7	6	3	4	0.166667	0.857143	1.33333	Carbamidomethylation	34910.8	Transcriptional activator protein Pur-alpha OS=Homo sapiens OX=9606 GN=PURA PE=1 SV=2
3756	TRUE	P49810|PSN2_HUMAN	129.078	2	1	8	8	6	5	6	8	1	0.833333	1.33333		50140.4	Presenilin-2 OS=Homo sapiens OX=9606 GN=PSEN2 PE=1 SV=1
3851	TRUE	P40337|VHL_HUMAN	124.337	2	2	4	5	4	3	3	4	1.25	0.75	1.33333		24152.8	von Hippel-Lindau disease tumor suppressor OS=Homo sapiens OX=9606 GN=VHL PE=1 SV=2
3687	TRUE	Q92600|CNOT9_HUMAN	131.844	3	3	5	4	12	9	9	12	0.8	0.75	1.33333		33631.2	CCR4-NOT transcription complex subunit 9 OS=Homo sapiens OX=9606 GN=CNOT9 PE=1 SV=1
3718	TRUE	P82663|RT25_HUMAN	130.654	3	3	7	9	7	5	6	8	1.28571	0.714286	1.33333		20116.4	28S ribosomal protein S25, mitochondrial OS=Homo sapiens OX=9606 GN=MRPS25 PE=1 SV=1
2400	TRUE	Q9H0R4|HDHD2_HUMAN	194.755	7	7	20	12	31	22	24	32	0.6	0.709677	1.33333	Carbamidomethylation; Oxidation (M)	28535.9	Haloacid dehalogenase-like hydrolase domain-containing protein 2 OS=Homo sapiens OX=9606 GN=HDHD2 PE=1 SV=1
3682	TRUE	Q8N442|GUF1_HUMAN	131.91	5	5	15	17	10	7	6	8	1.13333	0.7	1.33333	Carbamidomethylation; Oxidation (M)	74327.8	Translation factor GUF1, mitochondrial OS=Homo sapiens OX=9606 GN=GUF1 PE=1 SV=1
4739	TRUE	O94921|CDK14_HUMAN	83.0559	1	1	4	3	3	2	6	8	0.75	0.666667	1.33333		53056.9	Cyclin-dependent kinase 14 OS=Homo sapiens OX=9606 GN=CDK14 PE=1 SV=3
3305	TRUE	P54922|ADPRH_HUMAN	149.727	6	6		16	19	12	12	16	16	0.631579	1.33333	Oxidation (M)	39506.6	[Protein ADP-ribosylarginine] hydrolase OS=Homo sapiens OX=9606 GN=ADPRH PE=1 SV=1
4068	TRUE	Q6VN20|RBP10_HUMAN	115.175	3	3	4	4	8	5	3	4	1	0.625	1.33333		67256.7	Ran-binding protein 10 OS=Homo sapiens OX=9606 GN=RANBP10 PE=1 SV=1
1502	FALSE	O75525|KHDR3_HUMAN	53.3914	1	1	12	13	5	3	6	8	1.08333	0.6	1.33333	Oxidation (M)	38799.5	KH domain-containing, RNA-binding, signal transduction-associated protein 3 OS=Homo sapiens OX=9606 GN=KHDRBS3 PE=1 SV=1
1502	FALSE	Q5VWX1|KHDR2_HUMAN	53.3914	1	1	12	13	5	3	6	8	1.08333	0.6	1.33333	Oxidation (M)	38927.4	KH domain-containing, RNA-binding, signal transduction-associated protein 2 OS=Homo sapiens OX=9606 GN=KHDRBS2 PE=1 SV=1
3918	TRUE	Q5VSL9|STRP1_HUMAN	121.507	4	4	7	4	5	3	6	8	0.571429	0.6	1.33333	Carbamidomethylation; Oxidation (M)	95575.8	Striatin-interacting protein 1 OS=Homo sapiens OX=9606 GN=STRIP1 PE=1 SV=1
4477	TRUE	Q9NYL2|M3K20_HUMAN	95.7288	3	3			5	3	6	8		0.6	1.33333	Oxidation (M)	91155	Mitogen-activated protein kinase kinase kinase 20 OS=Homo sapiens OX=9606 GN=MAP3K20 PE=1 SV=3
4072	TRUE	P54252|ATX3_HUMAN	115.077	3	3	9	7	6	3	6	8	0.777778	0.5	1.33333	Oxidation (M)	41250	Ataxin-3 OS=Homo sapiens OX=9606 GN=ATXN3 PE=1 SV=5
4159	TRUE	Q7L5D6|GET4_HUMAN	110.766	2	2	4	4	7	2	12	16	1	0.285714	1.33333		36504.2	Golgi to ER traffic protein 4 homolog OS=Homo sapiens OX=9606 GN=GET4 PE=1 SV=1
5846	TRUE	Q155Q3|DIXC1_HUMAN	34.6724	1	1		3			3	4	3		1.33333	Oxidation (M)	77478.1	Dixin OS=Homo sapiens OX=9606 GN=DIXDC1 PE=1 SV=2
5453	TRUE	Q96EL3|RM53_HUMAN	54.2188	1	1	5	7			3	4	1.4		1.33333		12106.8	39S ribosomal protein L53, mitochondrial OS=Homo sapiens OX=9606 GN=MRPL53 PE=1 SV=1
3926	TRUE	Q92576|PHF3_HUMAN	121.154	6	6	14	16			3	4	1.14286		1.33333	Carbamidomethylation	229481	PHD finger protein 3 OS=Homo sapiens OX=9606 GN=PHF3 PE=1 SV=3
4707	TRUE	Q9BSV6|SEN34_HUMAN	84.7808	1	1		1			3	4	1		1.33333		33651.9	tRNA-splicing endonuclease subunit Sen34 OS=Homo sapiens OX=9606 GN=TSEN34 PE=1 SV=1
4573	TRUE	P61619|S61A1_HUMAN	90.4839	2	2	2	2			3	4	1		1.33333		52264.7	Protein transport protein Sec61 subunit alpha isoform 1 OS=Homo sapiens OX=9606 GN=SEC61A1 PE=1 SV=2
5024	TRUE	Q13670|PM2PB_HUMAN	70.9265	1	1	4	3			3	4	0.75		1.33333		28554.6	Putative postmeiotic segregation increased 2-like protein 11 OS=Homo sapiens OX=9606 GN=PMS2P11 PE=5 SV=1
5457	TRUE	P19532|TFE3_HUMAN	54.1341	1	1					3	4			1.33333		61521	Transcription factor E3 OS=Homo sapiens OX=9606 GN=TFE3 PE=1 SV=4
5550	TRUE	O94829|IPO13_HUMAN	49.1851	1	1					3	4			1.33333		108195	Importin-13 OS=Homo sapiens OX=9606 GN=IPO13 PE=1 SV=3
644	FALSE	Q6IS14|IF5AL_HUMAN	283.6	9	9	74	75	46	57	74	98	1.01351	1.23913	1.32432	Carbamidomethylation; Oxidation (M)	16773.2	Eukaryotic translation initiation factor 5A-1-like OS=Homo sapiens OX=9606 GN=EIF5AL1 PE=2 SV=2
1115	TRUE	O75044|SRGP2_HUMAN	269.282	15	14	25	37	12	30	34	45	1.48	2.5	1.32353	Carbamidomethylation; Oxidation (M)	120871	SLIT-ROBO Rho GTPase-activating protein 2 OS=Homo sapiens OX=9606 GN=SRGAP2 PE=1 SV=3
567	TRUE	Q15046|SYK_HUMAN	320.27	21	21	62	77	53	73	87	115	1.24194	1.37736	1.32184	Carbamidomethylation; Oxidation (M)	68048.1	Lysine--tRNA ligase OS=Homo sapiens OX=9606 GN=KARS1 PE=1 SV=3
809	TRUE	O00232|PSD12_HUMAN	293.525	15	15	91	116	78	95	85	112	1.27473	1.21795	1.31765	Carbamidomethylation; Oxidation (M)	52904.4	26S proteasome non-ATPase regulatory subunit 12 OS=Homo sapiens OX=9606 GN=PSMD12 PE=1 SV=3
1341	TRUE	P47712|PA24A_HUMAN	253.347	11	11	17	23	7	25	19	25	1.35294	3.57143	1.31579	Carbamidomethylation; Oxidation (M)	85238.9	Cytosolic phospholipase A2 OS=Homo sapiens OX=9606 GN=PLA2G4A PE=1 SV=2
2132	TRUE	Q9NVE7|PANK4_HUMAN	208.371	9	9	19	25	22	25	19	25	1.31579	1.13636	1.31579	Carbamidomethylation	85990.9	4'-phosphopantetheine phosphatase OS=Homo sapiens OX=9606 GN=PANK4 PE=1 SV=1
628	TRUE	Q13451|FKBP5_HUMAN	313.09	18	18	33	60	56	76	64	84	1.81818	1.35714	1.3125	Carbamidomethylation; Oxidation (M)	51212.2	Peptidyl-prolyl cis-trans isomerase FKBP5 OS=Homo sapiens OX=9606 GN=FKBP5 PE=1 SV=2
2232	TRUE	Q8WVT3|TPC12_HUMAN	202.985	9	9	15	16	8	9	16	21	1.06667	1.125	1.3125	Oxidation (M); Carbamidomethylation	79375.1	Trafficking protein particle complex subunit 12 OS=Homo sapiens OX=9606 GN=TRAPPC12 PE=1 SV=3
2905	TRUE	P02686|MBP_HUMAN	170.199	4	4	10	8	18	17	16	21	0.8	0.944444	1.3125	Oxidation (M)	33117.1	Myelin basic protein OS=Homo sapiens OX=9606 GN=MBP PE=1 SV=3
1669	TRUE	Q9NZL9|MAT2B_HUMAN	232.764	11	11	34	31	35	32	42	55	0.911765	0.914286	1.30952	Carbamidomethylation; Oxidation (M)	37551.8	Methionine adenosyltransferase 2 subunit beta OS=Homo sapiens OX=9606 GN=MAT2B PE=1 SV=1
3595	TRUE	Q9BRR9|RHG09_HUMAN	136.324	3	3		1	1	3	13	17	1	3	1.30769		83259.6	Rho GTPase-activating protein 9 OS=Homo sapiens OX=9606 GN=ARHGAP9 PE=1 SV=2
2680	TRUE	Q01130|SRSF2_HUMAN	181.699	3	3	6	11	14	28	13	17	1.83333	2	1.30769	Oxidation (M)	25476.3	Serine/arginine-rich splicing factor 2 OS=Homo sapiens OX=9606 GN=SRSF2 PE=1 SV=4
2681	TRUE	P31483|TIA1_HUMAN	181.685	6	4	7	9	6	11	13	17	1.28571	1.83333	1.30769	Oxidation (M)	42963.1	Nucleolysin TIA-1 isoform p40 OS=Homo sapiens OX=9606 GN=TIA1 PE=1 SV=3
1751	TRUE	Q9BUP3|HTAI2_HUMAN	228.548	8	8	28	29	11	20	13	17	1.03571	1.81818	1.30769	Carbamidomethylation	27049	Oxidoreductase HTATIP2 OS=Homo sapiens OX=9606 GN=HTATIP2 PE=1 SV=2
3338	TRUE	Q01844|EWS_HUMAN	148.387	4	4	8	7	6	9	13	17	0.875	1.5	1.30769	Carbamidomethylation; Oxidation (M)	68478.2	RNA-binding protein EWS OS=Homo sapiens OX=9606 GN=EWSR1 PE=1 SV=1
2250	TRUE	P50749|RASF2_HUMAN	202.298	7	6	22	41	18	24	26	34	1.86364	1.33333	1.30769	Oxidation (M)	37790.2	Ras association domain-containing protein 2 OS=Homo sapiens OX=9606 GN=RASSF2 PE=1 SV=1
693	TRUE	Q14683|SMC1A_HUMAN	305.446	26	26	60	69	47	45	65	85	1.15	0.957447	1.30769	Carbamidomethylation; Oxidation (M)	143233	Structural maintenance of chromosomes protein 1A OS=Homo sapiens OX=9606 GN=SMC1A PE=1 SV=2
1606	FALSE	Q13554|KCC2B_HUMAN	166.493	4	1	19	18	15	13	13	17	0.947368	0.866667	1.30769		72677.8	Calcium/calmodulin-dependent protein kinase type II subunit beta OS=Homo sapiens OX=9606 GN=CAMK2B PE=1 SV=3
1429	TRUE	P12081|HARS1_HUMAN	247.284	11	9	24	24	39	22	26	34	1	0.564103	1.30769	Carbamidomethylation	57410.5	Histidine--tRNA ligase, cytoplasmic OS=Homo sapiens OX=9606 GN=HARS1 PE=1 SV=2
3320	TRUE	O15347|HMGB3_HUMAN	148.968	4	4	15	13	20	11	13	17	0.866667	0.55	1.30769	Oxidation (M)	22980	High mobility group protein B3 OS=Homo sapiens OX=9606 GN=HMGB3 PE=1 SV=4
1380	TRUE	Q9UBF2|COPG2_HUMAN	250.906	15	13	41	34	9	17	36	47	0.829268	1.88889	1.30556	Carbamidomethylation; Oxidation (M)	97622.3	Coatomer subunit gamma-2 OS=Homo sapiens OX=9606 GN=COPG2 PE=1 SV=1
2067	TRUE	Q53HC9|EIPR1_HUMAN	211.817	5	5	9	7	11	7	23	30	0.777778	0.636364	1.30435		43603.3	EARP and GARP complex-interacting protein 1 OS=Homo sapiens OX=9606 GN=EIPR1 PE=1 SV=2
180	TRUE	P10321|HLAC_HUMAN	386.653	22	9	105	127	155	222	109	142	1.20952	1.43226	1.30275	Carbamidomethylation	40648.5	HLA class I histocompatibility antigen, C alpha chain OS=Homo sapiens OX=9606 GN=HLA-C PE=1 SV=3
875	TRUE	Q2M389|WASC4_HUMAN	287.911	14	14	41	59	56	53	53	69	1.43902	0.946429	1.30189	Carbamidomethylation; Oxidation (M)	136403	WASH complex subunit 4 OS=Homo sapiens OX=9606 GN=WASHC4 PE=1 SV=2
3412	TRUE	P17081|RHOQ_HUMAN	144.678	3	2	27	30	20	36	20	26	1.11111	1.8	1.3	Carbamidomethylation	22659.5	Rho-related GTP-binding protein RhoQ OS=Homo sapiens OX=9606 GN=RHOQ PE=1 SV=2
2845	TRUE	Q9UQ13|SHOC2_HUMAN	173.085	7	7	11	17	12	20	10	13	1.54545	1.66667	1.3	Carbamidomethylation	64888	Leucine-rich repeat protein SHOC-2 OS=Homo sapiens OX=9606 GN=SHOC2 PE=1 SV=2
2705	TRUE	Q96CN7|ISOC1_HUMAN	180.714	6	6	21	25	23	25	20	26	1.19048	1.08696	1.3		32236.7	Isochorismatase domain-containing protein 1 OS=Homo sapiens OX=9606 GN=ISOC1 PE=1 SV=3
3265	TRUE	O14548|COX7R_HUMAN	151.482	3	3	14	15	23	18	10	13	1.07143	0.782609	1.3		12614.7	Cytochrome c oxidase subunit 7A-related protein, mitochondrial OS=Homo sapiens OX=9606 GN=COX7A2L PE=1 SV=2
4022	TRUE	Q9Y580|RBM7_HUMAN	116.85	2	2	11	15	19	12	10	13	1.36364	0.631579	1.3		30503.5	RNA-binding protein 7 OS=Homo sapiens OX=9606 GN=RBM7 PE=1 SV=1
3350	TRUE	Q96S44|PRPK_HUMAN	147.887	3	3	14	22	14	7	10	13	1.57143	0.5	1.3		28160.4	EKC/KEOPS complex subunit TP53RK OS=Homo sapiens OX=9606 GN=TP53RK PE=1 SV=2
275	TRUE	P54920|SNAA_HUMAN	364.379	23	20	187	191	136	173	174	226	1.02139	1.27206	1.29885	Carbamidomethylation; Oxidation (M)	33232.7	Alpha-soluble NSF attachment protein OS=Homo sapiens OX=9606 GN=NAPA PE=1 SV=3
279	TRUE	P06702|S10A9_HUMAN	362.847	20	20	881	1053	970	1046	1182	1535	1.19523	1.07835	1.29865	Oxidation (M)	13242	Protein S100-A9 OS=Homo sapiens OX=9606 GN=S100A9 PE=1 SV=1
644	TRUE	P63241|IF5A1_HUMAN	311.51	13	13	76	81	55	68	84	109	1.06579	1.23636	1.29762	Carbamidomethylation; Oxidation (M)	16832.2	Eukaryotic translation initiation factor 5A-1 OS=Homo sapiens OX=9606 GN=EIF5A PE=1 SV=2
829	TRUE	P49321|NASP_HUMAN	291.588	16	16	57	34	61	56	37	48	0.596491	0.918033	1.2973	Oxidation (M); Carbamidomethylation	85237.7	Nuclear autoantigenic sperm protein OS=Homo sapiens OX=9606 GN=NASP PE=1 SV=2
757	TRUE	P35237|SPB6_HUMAN	299.12	16	16	122	142	86	91	98	127	1.16393	1.05814	1.29592	Oxidation (M); Carbamidomethylation	42621.9	Serpin B6 OS=Homo sapiens OX=9606 GN=SERPINB6 PE=1 SV=3
3024	TRUE	P35659|DEK_HUMAN	164.009	4	4	13	16	9	18	17	22	1.23077	2	1.29412	Oxidation (M)	42674.3	Protein DEK OS=Homo sapiens OX=9606 GN=DEK PE=1 SV=1
2935	TRUE	Q9BX68|HINT2_HUMAN	167.99	5	5	19	22	20	22	17	22	1.15789	1.1	1.29412	Carbamidomethylation	17161.8	Histidine triad nucleotide-binding protein 2, mitochondrial OS=Homo sapiens OX=9606 GN=HINT2 PE=1 SV=1
2866	TRUE	Q9NPI6|DCP1A_HUMAN	172.235	5	5	12	20	1	1	17	22	1.66667	1	1.29412	Carbamidomethylation	63278.5	mRNA-decapping enzyme 1A OS=Homo sapiens OX=9606 GN=DCP1A PE=1 SV=3
1592	TRUE	P35914|HMGCL_HUMAN	236.919	8	8	71	61	67	50	58	75	0.859155	0.746269	1.2931	Oxidation (M); Carbamidomethylation	34360.1	Hydroxymethylglutaryl-CoA lyase, mitochondrial OS=Homo sapiens OX=9606 GN=HMGCL PE=1 SV=2
634	TRUE	P27695|APEX1_HUMAN	312.245	12	12	86	108	60	73	89	115	1.25581	1.21667	1.29213	Carbamidomethylation	35554.5	DNA-(apurinic or apyrimidinic site) endonuclease OS=Homo sapiens OX=9606 GN=APEX1 PE=1 SV=2
2745	TRUE	Q86WV6|STING_HUMAN	178.781	4	4	13	21	13	20	24	31	1.61538	1.53846	1.29167	Carbamidomethylation	42192.6	Stimulator of interferon genes protein OS=Homo sapiens OX=9606 GN=STING1 PE=1 SV=1
390	TRUE	P01893|HLAH_HUMAN	343.594	16	3	109	129	136	183	69	89	1.18349	1.34559	1.28986	Carbamidomethylation; Oxidation (M)	40891.9	Putative HLA class I histocompatibility antigen, alpha chain H OS=Homo sapiens OX=9606 GN=HLA-H PE=5 SV=3
481	TRUE	Q9Y4E8|UBP15_HUMAN	331.255	22	22	99	94	59	78	107	138	0.949495	1.32203	1.28972	Carbamidomethylation; Oxidation (M)	112419	Ubiquitin carboxyl-terminal hydrolase 15 OS=Homo sapiens OX=9606 GN=USP15 PE=1 SV=3
930	TRUE	P19838|NFKB1_HUMAN	283.109	13	13	17	19	11	33	45	58	1.11765	3	1.28889	Oxidation (M); Carbamidomethylation	105356	Nuclear factor NF-kappa-B p105 subunit OS=Homo sapiens OX=9606 GN=NFKB1 PE=1 SV=2
695	FALSE	Q8IX94|CTGE4_HUMAN	119.601	2	2	8	9		5	7	9	1.125	5	1.28571	Carbamidomethylation	87988.9	cTAGE family member 4 OS=Homo sapiens OX=9606 GN=CTAGE4 PE=2 SV=3
695	FALSE	P0CG41|CTGE8_HUMAN	119.601	2	2	8	9		5	7	9	1.125	5	1.28571	Carbamidomethylation	88077	cTAGE family member 8 OS=Homo sapiens OX=9606 GN=CTAGE8 PE=3 SV=1
695	FALSE	A4D2H0|CTGEF_HUMAN	119.601	2	2	8	9		5	7	9	1.125	5	1.28571	Carbamidomethylation	87867.8	cTAGE family member 15 OS=Homo sapiens OX=9606 GN=CTAGE15 PE=2 SV=1
695	FALSE	Q86UF2|CTGE6_HUMAN	119.601	2	2	8	9		5	7	9	1.125	5	1.28571	Carbamidomethylation	87899.8	cTAGE family member 6 OS=Homo sapiens OX=9606 GN=CTAGE6 PE=2 SV=2
3511	TRUE	Q86U28|ISCA2_HUMAN	140.009	4	4	8	13	6	12	7	9	1.625	2	1.28571		16476.4	Iron-sulfur cluster assembly 2 homolog, mitochondrial OS=Homo sapiens OX=9606 GN=ISCA2 PE=1 SV=2
741	FALSE	Q9UKY3|CES1P_HUMAN	135.172	2	2	13	9	12	19	14	18	0.692308	1.58333	1.28571	Carbamidomethylation	30678.6	Putative inactive carboxylesterase 4 OS=Homo sapiens OX=9606 GN=CES1P1 PE=5 SV=2
1510	TRUE	P08631|HCK_HUMAN	242.122	14	11	34	44	23	36	35	45	1.29412	1.56522	1.28571	Carbamidomethylation	59599.8	Tyrosine-protein kinase HCK OS=Homo sapiens OX=9606 GN=HCK PE=1 SV=5
2805	TRUE	O60449|LY75_HUMAN	175.248	6	6	12	21	6	9	14	18	1.75	1.5	1.28571	Carbamidomethylation	198311	Lymphocyte antigen 75 OS=Homo sapiens OX=9606 GN=LY75 PE=1 SV=3
2952	TRUE	O75934|SPF27_HUMAN	167.199	5	5	20	22	5	7	14	18	1.1	1.4	1.28571		26131.4	Pre-mRNA-splicing factor SPF27 OS=Homo sapiens OX=9606 GN=BCAS2 PE=1 SV=1
2299	TRUE	Q96EP5|DAZP1_HUMAN	199.621	7	7	15	13	31	40	28	36	0.866667	1.29032	1.28571	Carbamidomethylation; Oxidation (M)	43383.4	DAZ-associated protein 1 OS=Homo sapiens OX=9606 GN=DAZAP1 PE=1 SV=1
2231	TRUE	Q52LJ0|FA98B_HUMAN	203.048	6	6	40	29	26	23	35	45	0.725	0.884615	1.28571	Carbamidomethylation; Oxidation (M)	45547.2	Protein FAM98B OS=Homo sapiens OX=9606 GN=FAM98B PE=1 SV=2
2371	TRUE	P46977|STT3A_HUMAN	195.88	7	7	16	22	10	8	21	27	1.375	0.8	1.28571		80529.6	Dolichyl-diphosphooligosaccharide--protein glycosyltransferase subunit STT3A OS=Homo sapiens OX=9606 GN=STT3A PE=1 SV=2
3022	TRUE	O95822|DCMC_HUMAN	164.042	5	5	6	13	9	7	7	9	2.16667	0.777778	1.28571	Carbamidomethylation	55003.4	Malonyl-CoA decarboxylase, mitochondrial OS=Homo sapiens OX=9606 GN=MLYCD PE=1 SV=3
3864	TRUE	Q96Q11|TRNT1_HUMAN	123.821	3	3	5	6	5	3	7	9	1.2	0.6	1.28571		50127.6	CCA tRNA nucleotidyltransferase 1, mitochondrial OS=Homo sapiens OX=9606 GN=TRNT1 PE=1 SV=2
4020	TRUE	Q13895|BYST_HUMAN	116.946	3	3	6	6	9	5	7	9	1	0.555556	1.28571		49601.3	Bystin OS=Homo sapiens OX=9606 GN=BYSL PE=1 SV=3
3433	TRUE	Q8WWW0|RASF5_HUMAN	143.161	4	4	8	7	15	7	7	9	0.875	0.466667	1.28571		47090.1	Ras association domain-containing protein 5 OS=Homo sapiens OX=9606 GN=RASSF5 PE=1 SV=1
1629	TRUE	Q8WYP5|ELYS_HUMAN	234.946	14	14	41	26	15	7	14	18	0.634146	0.466667	1.28571	Carbamidomethylation; Oxidation (M)	252498	Protein ELYS OS=Homo sapiens OX=9606 GN=AHCTF1 PE=1 SV=3
1090	TRUE	O75558|STX11_HUMAN	270.902	12	12	35	51	28	55	53	68	1.45714	1.96429	1.28302	Oxidation (M)	33195.8	Syntaxin-11 OS=Homo sapiens OX=9606 GN=STX11 PE=1 SV=1
2019	TRUE	O95721|SNP29_HUMAN	214.187	11	11	31	26	33	26	39	50	0.83871	0.787879	1.28205	Oxidation (M)	28970.3	Synaptosomal-associated protein 29 OS=Homo sapiens OX=9606 GN=SNAP29 PE=1 SV=1
1480	TRUE	Q5T8D3|ACBD5_HUMAN	244.192	12	12	35	36	21	40	32	41	1.02857	1.90476	1.28125	Oxidation (M)	60091.8	Acyl-CoA-binding domain-containing protein 5 OS=Homo sapiens OX=9606 GN=ACBD5 PE=1 SV=1
2071	TRUE	P62318|SMD3_HUMAN	211.564	5	5	12	19	25	17	32	41	1.58333	0.68	1.28125	Carbamidomethylation	13916.2	Small nuclear ribonucleoprotein Sm D3 OS=Homo sapiens OX=9606 GN=SNRPD3 PE=1 SV=1
2022	TRUE	P22059|OSBP1_HUMAN	214.061	9	9	27	36	20	24	25	32	1.33333	1.2	1.28	Carbamidomethylation; Oxidation (M)	89420.6	Oxysterol-binding protein 1 OS=Homo sapiens OX=9606 GN=OSBP PE=1 SV=1
1791	TRUE	P02794|FRIH_HUMAN	225.912	9	9	38	14	21	24	25	32	0.368421	1.14286	1.28	Carbamidomethylation; Oxidation (M)	21225.6	Ferritin heavy chain OS=Homo sapiens OX=9606 GN=FTH1 PE=1 SV=2
1407	TRUE	Q7Z5R6|AB1IP_HUMAN	249.328	10	10	40	46	30	57	43	55	1.15	1.9	1.27907	Carbamidomethylation; Oxidation (M)	73182.7	Amyloid beta A4 precursor protein-binding family B member 1-interacting protein OS=Homo sapiens OX=9606 GN=APBB1IP PE=1 SV=1
1284	TRUE	P41226|UBA7_HUMAN	256.421	17	17	16	11	20	16	43	55	0.6875	0.8	1.27907	Carbamidomethylation; Oxidation (M)	111694	Ubiquitin-like modifier-activating enzyme 7 OS=Homo sapiens OX=9606 GN=UBA7 PE=1 SV=2
2351	TRUE	P42898|MTHR_HUMAN	197.081	7	7	5	19	14	19	18	23	3.8	1.35714	1.27778	Carbamidomethylation; Oxidation (M)	74596.6	Methylenetetrahydrofolate reductase OS=Homo sapiens OX=9606 GN=MTHFR PE=1 SV=3
1609	TRUE	Q9Y2T2|AP3M1_HUMAN	236.049	10	9	30	36	52	59	54	69	1.2	1.13462	1.27778	Carbamidomethylation; Oxidation (M)	46939.2	AP-3 complex subunit mu-1 OS=Homo sapiens OX=9606 GN=AP3M1 PE=1 SV=1
1897	TRUE	Q15018|ABRX2_HUMAN	220.26	11	11	25	22	28	29	18	23	0.88	1.03571	1.27778	Oxidation (M); Carbamidomethylation	46900.8	BRISC complex subunit Abraxas 2 OS=Homo sapiens OX=9606 GN=ABRAXAS2 PE=1 SV=2
3085	TRUE	O15212|PFD6_HUMAN	160.936	5	5	16	17	20	20	18	23	1.0625	1	1.27778		14582.7	Prefoldin subunit 6 OS=Homo sapiens OX=9606 GN=PFDN6 PE=1 SV=1
2383	TRUE	Q9H993|ARMT1_HUMAN	195.535	10	10	8	13	11	10	18	23	1.625	0.909091	1.27778	Carbamidomethylation	51172.3	Damage-control phosphatase ARMT1 OS=Homo sapiens OX=9606 GN=ARMT1 PE=1 SV=1
2369	TRUE	P48507|GSH0_HUMAN	196.018	9	9	20	15	14	9	18	23	0.75	0.642857	1.27778	Carbamidomethylation	30727	Glutamate--cysteine ligase regulatory subunit OS=Homo sapiens OX=9606 GN=GCLM PE=1 SV=1
1655	TRUE	O60234|GMFG_HUMAN	233.466	6	6	62	62	73	68	62	79	1	0.931507	1.27419	Oxidation (M)	16801.3	Glia maturation factor gamma OS=Homo sapiens OX=9606 GN=GMFG PE=1 SV=1
95	TRUE	Q9Y4G6|TLN2_HUMAN	427.308	47	37	112	170	97	109	183	233	1.51786	1.12371	1.27322	Carbamidomethylation; Oxidation (M)	271613	Talin-2 OS=Homo sapiens OX=9606 GN=TLN2 PE=1 SV=4
3463	TRUE	Q5EG05|CAR16_HUMAN	141.903	3	2	16	21	12	21	11	14	1.3125	1.75	1.27273	Oxidation (M)	22625.3	Caspase recruitment domain-containing protein 16 OS=Homo sapiens OX=9606 GN=CARD16 PE=1 SV=1
3161	TRUE	P51809|VAMP7_HUMAN	157.407	4	4	18	27	18	31	22	28	1.5	1.72222	1.27273	Oxidation (M)	24935.1	Vesicle-associated membrane protein 7 OS=Homo sapiens OX=9606 GN=VAMP7 PE=1 SV=3
3324	TRUE	Q9Y3B7|RM11_HUMAN	148.784	4	4	8	13	7	12	11	14	1.625	1.71429	1.27273		20683.2	39S ribosomal protein L11, mitochondrial OS=Homo sapiens OX=9606 GN=MRPL11 PE=1 SV=1
2658	TRUE	Q8N684|CPSF7_HUMAN	182.506	6	6	9	9	9	12	11	14	1	1.33333	1.27273	Carbamidomethylation; Oxidation (M)	52050	Cleavage and polyadenylation specificity factor subunit 7 OS=Homo sapiens OX=9606 GN=CPSF7 PE=1 SV=1
1269	TRUE	P09543|CN37_HUMAN	257.272	14	14	21	28	26	29	22	28	1.33333	1.11538	1.27273	Carbamidomethylation	47578.6	2',3'-cyclic-nucleotide 3'-phosphodiesterase OS=Homo sapiens OX=9606 GN=CNP PE=1 SV=2
2896	TRUE	Q8NFH5|NUP35_HUMAN	170.669	6	6	15	12	6	5	11	14	0.8	0.833333	1.27273	Oxidation (M)	34773.8	Nucleoporin NUP35 OS=Homo sapiens OX=9606 GN=NUP35 PE=1 SV=1
2727	TRUE	Q96I25|SPF45_HUMAN	179.636	6	6	16	15	10	7	11	14	0.9375	0.7	1.27273		44961.5	Splicing factor 45 OS=Homo sapiens OX=9606 GN=RBM17 PE=1 SV=1
26	FALSE	Q58FG0|HS905_HUMAN	236.079	6	2	194	183	96	102	158	201	0.943299	1.0625	1.27215		38738	Putative heat shock protein HSP 90-alpha A5 OS=Homo sapiens OX=9606 GN=HSP90AA5P PE=2 SV=1
222	TRUE	P29966|MARCS_HUMAN	374.962	15	15	129	156	131	179	210	267	1.2093	1.36641	1.27143		31554.7	Myristoylated alanine-rich C-kinase substrate OS=Homo sapiens OX=9606 GN=MARCKS PE=1 SV=4
842	TRUE	Q9UBW5|BIN2_HUMAN	290.672	14	14	63	58	51	61	59	75	0.920635	1.19608	1.27119	Carbamidomethylation; Oxidation (M)	61874.4	Bridging integrator 2 OS=Homo sapiens OX=9606 GN=BIN2 PE=1 SV=3
2089	TRUE	P63000|RAC1_HUMAN	210.63	6	3	30	28	32	27	26	33	0.933333	0.84375	1.26923	Carbamidomethylation; Oxidation (M)	21450.1	Ras-related C3 botulinum toxin substrate 1 OS=Homo sapiens OX=9606 GN=RAC1 PE=1 SV=1
2706	TRUE	Q9Y5A7|NUB1_HUMAN	180.703	5	5	8	14	11	11	15	19	1.75	1	1.26667	Oxidation (M)	70538.1	NEDD8 ultimate buster 1 OS=Homo sapiens OX=9606 GN=NUB1 PE=1 SV=2
771	TRUE	P31146|COR1A_HUMAN	298.395	18	18	73	71	68	67	60	76	0.972603	0.985294	1.26667	Oxidation (M); Carbamidomethylation	51026.2	Coronin-1A OS=Homo sapiens OX=9606 GN=CORO1A PE=1 SV=4
2447	TRUE	Q32P44|EMAL3_HUMAN	192.809	8	8	14	13	7	6	15	19	0.928571	0.857143	1.26667		95196.8	Echinoderm microtubule-associated protein-like 3 OS=Homo sapiens OX=9606 GN=EML3 PE=1 SV=1
110	TRUE	P04439|HLAA_HUMAN	415.32	28	13	270	295	345	439	173	219	1.09259	1.27246	1.2659	Carbamidomethylation; Oxidation (M)	40840.7	HLA class I histocompatibility antigen, A alpha chain OS=Homo sapiens OX=9606 GN=HLA-A PE=1 SV=2
376	TRUE	Q9BZQ8|NIBA1_HUMAN	346.245	28	28	117	98	82	115	79	100	0.837607	1.40244	1.26582	Carbamidomethylation; Oxidation (M)	103135	Protein Niban 1 OS=Homo sapiens OX=9606 GN=NIBAN1 PE=1 SV=1
1940	TRUE	Q9H0W9|CK054_HUMAN	218.246	6	6	48	55	14	16	19	24	1.14583	1.14286	1.26316	Carbamidomethylation; Oxidation (M)	35117.3	Ester hydrolase C11orf54 OS=Homo sapiens OX=9606 GN=C11orf54 PE=1 SV=1
2134	TRUE	O60256|KPRB_HUMAN	208.27	7	6	33	29	16	16	19	24	0.878788	1	1.26316		40925.7	Phosphoribosyl pyrophosphate synthase-associated protein 2 OS=Homo sapiens OX=9606 GN=PRPSAP2 PE=1 SV=1
123	TRUE	P80723|BASP1_HUMAN	410.122	21	21	172	159	122	142	202	255	0.924419	1.16393	1.26238		22693.4	Brain acid soluble protein 1 OS=Homo sapiens OX=9606 GN=BASP1 PE=1 SV=2
1731	TRUE	Q13277|STX3_HUMAN	229.177	9	9	31	41	23	21	23	29	1.32258	0.913043	1.26087	Oxidation (M)	33155	Syntaxin-3 OS=Homo sapiens OX=9606 GN=STX3 PE=1 SV=3
398	TRUE	O75410|TACC1_HUMAN	342.141	20	20	77	81	70	70	77	97	1.05195	1	1.25974	Carbamidomethylation; Oxidation (M)	87794.3	Transforming acidic coiled-coil-containing protein 1 OS=Homo sapiens OX=9606 GN=TACC1 PE=1 SV=2
1812	TRUE	Q9H0L4|CSTFT_HUMAN	224.566	8	2	17	31	27	22	27	34	1.82353	0.814815	1.25926	Carbamidomethylation; Oxidation (M)	64436.5	Cleavage stimulation factor subunit 2 tau variant OS=Homo sapiens OX=9606 GN=CSTF2T PE=1 SV=1
397	FALSE	Q9UI15|TAGL3_HUMAN	111.245	2	2	20	22	45	31	27	34	1.1	0.688889	1.25926	Oxidation (M)	22472.6	Transgelin-3 OS=Homo sapiens OX=9606 GN=TAGLN3 PE=1 SV=2
1965	TRUE	Q01459|DIAC_HUMAN	216.936	6	6	20	24	8	15	31	39	1.2	1.875	1.25806	Oxidation (M); Carbamidomethylation	43759.8	Di-N-acetylchitobiase OS=Homo sapiens OX=9606 GN=CTBS PE=1 SV=1
1397	TRUE	Q9UN37|VPS4A_HUMAN	249.892	13	12	41	45	37	27	31	39	1.09756	0.72973	1.25806	Oxidation (M); Carbamidomethylation	48897.9	Vacuolar protein sorting-associated protein 4A OS=Homo sapiens OX=9606 GN=VPS4A PE=1 SV=1
285	TRUE	P33121|ACSL1_HUMAN	361.458	26	25	235	234	174	189	160	201	0.995745	1.08621	1.25625	Carbamidomethylation; Oxidation (M)	77943.3	Long-chain-fatty-acid--CoA ligase 1 OS=Homo sapiens OX=9606 GN=ACSL1 PE=1 SV=1
863	TRUE	Q9BXD5|NPL_HUMAN	289.031	15	15	79	76	91	102	82	103	0.962025	1.12088	1.2561	Carbamidomethylation; Oxidation (M)	35162.5	N-acetylneuraminate lyase OS=Homo sapiens OX=9606 GN=NPL PE=1 SV=1
1065	TRUE	O60264|SMCA5_HUMAN	272.414	17	17	58	54	42	35	43	54	0.931034	0.833333	1.25581	Carbamidomethylation; Oxidation (M)	121905	SWI/SNF-related matrix-associated actin-dependent regulator of chromatin subfamily A member 5 OS=Homo sapiens OX=9606 GN=SMARCA5 PE=1 SV=1
1631	TRUE	Q15008|PSMD6_HUMAN	234.88	11	11	38	38	33	34	47	59	1	1.0303	1.25532	Oxidation (M); Carbamidomethylation	45531.3	26S proteasome non-ATPase regulatory subunit 6 OS=Homo sapiens OX=9606 GN=PSMD6 PE=1 SV=1
1755	TRUE	P50135|HNMT_HUMAN	228.336	7	7	19	18	20	20	47	59	0.947368	1	1.25532	Carbamidomethylation; Oxidation (M)	33295.1	Histamine N-methyltransferase OS=Homo sapiens OX=9606 GN=HNMT PE=1 SV=1
1131	TRUE	Q93052|LPP_HUMAN	268.305	10	10	45	54	39	27	67	84	1.2	0.692308	1.25373	Oxidation (M); Carbamidomethylation	65746.3	Lipoma-preferred partner OS=Homo sapiens OX=9606 GN=LPP PE=1 SV=1
2322	TRUE	Q7Z4H8|PLGT3_HUMAN	198.554	9	9	28	27	2	11	44	55	0.964286	5.5	1.25	Oxidation (M)	58572.5	Protein O-glucosyltransferase 3 OS=Homo sapiens OX=9606 GN=POGLUT3 PE=1 SV=2
2833	TRUE	Q9Y4X5|ARI1_HUMAN	173.482	5	5	9	9		5	12	15	1	5	1.25	Carbamidomethylation	64117.8	E3 ubiquitin-protein ligase ARIH1 OS=Homo sapiens OX=9606 GN=ARIH1 PE=1 SV=2
2295	FALSE	Q9Y247|FA50B_HUMAN	111.377	2	2	2		2	9	8	10	0.5	4.5	1.25	Oxidation (M)	38708.7	Protein FAM50B OS=Homo sapiens OX=9606 GN=FAM50B PE=1 SV=1
745	FALSE	P0CB38|PAB4L_HUMAN	61.4559	1	1	7	6	1	2	4	5	0.857143	2	1.25		41854	Polyadenylate-binding protein 4-like OS=Homo sapiens OX=9606 GN=PABPC4L PE=2 SV=1
2877	TRUE	P78537|BL1S1_HUMAN	171.897	5	5	23	29	15	28	16	20	1.26087	1.86667	1.25	Carbamidomethylation; Oxidation (M)	17262.6	Biogenesis of lysosome-related organelles complex 1 subunit 1 OS=Homo sapiens OX=9606 GN=BLOC1S1 PE=1 SV=2
2129	TRUE	Q9UPZ3|HPS5_HUMAN	208.477	10	10	14	18	17	31	20	25	1.28571	1.82353	1.25	Oxidation (M)	127449	Hermansky-Pudlak syndrome 5 protein OS=Homo sapiens OX=9606 GN=HPS5 PE=1 SV=2
3553	TRUE	O60869|EDF1_HUMAN	138.046	3	3	19	14	4	7	8	10	0.736842	1.75	1.25		16368.7	Endothelial differentiation-related factor 1 OS=Homo sapiens OX=9606 GN=EDF1 PE=1 SV=1
2949	TRUE	Q99571|P2RX4_HUMAN	167.515	4	4	11	14	7	12	4	5	1.27273	1.71429	1.25	Carbamidomethylation	43369.1	P2X purinoceptor 4 OS=Homo sapiens OX=9606 GN=P2RX4 PE=1 SV=2
2742	TRUE	Q06787|FMR1_HUMAN	178.916	6	6	24	28	10	17	12	15	1.16667	1.7	1.25	Carbamidomethylation	71174.5	Synaptic functional regulator FMR1 OS=Homo sapiens OX=9606 GN=FMR1 PE=1 SV=1
3624	TRUE	Q8WUA2|PPIL4_HUMAN	134.99	4	4	9	4	8	13	8	10	0.444444	1.625	1.25		57225.1	Peptidyl-prolyl cis-trans isomerase-like 4 OS=Homo sapiens OX=9606 GN=PPIL4 PE=1 SV=1
1506	TRUE	O75914|PAK3_HUMAN	242.431	11	2	22	30	19	29	32	40	1.36364	1.52632	1.25	Carbamidomethylation; Oxidation (M)	62309.6	Serine/threonine-protein kinase PAK 3 OS=Homo sapiens OX=9606 GN=PAK3 PE=1 SV=2
4121	TRUE	Q7Z422|SZRD1_HUMAN	113.151	2	2	5	11	10	15	8	10	2.2	1.5	1.25		16997	SUZ domain-containing protein 1 OS=Homo sapiens OX=9606 GN=SZRD1 PE=1 SV=1
2209	TRUE	Q13190|STX5_HUMAN	204.515	10	10	38	48	22	33	24	30	1.26316	1.5	1.25	Oxidation (M); Carbamidomethylation	39672.5	Syntaxin-5 OS=Homo sapiens OX=9606 GN=STX5 PE=1 SV=2
3717	TRUE	Q9BSH4|TACO1_HUMAN	130.67	5	5	4	4	4	6	4	5	1	1.5	1.25	Oxidation (M); Carbamidomethylation	32477.1	Translational activator of cytochrome c oxidase 1 OS=Homo sapiens OX=9606 GN=TACO1 PE=1 SV=1
687	TRUE	P20020|AT2B1_HUMAN	306.199	21	13	75	73	49	62	68	85	0.973333	1.26531	1.25	Oxidation (M); Carbamidomethylation	134685	Plasma membrane calcium-transporting ATPase 1 OS=Homo sapiens OX=9606 GN=ATP2B1 PE=1 SV=4
2419	TRUE	Q15758|AAAT_HUMAN	194.041	5	5	26	30	23	29	16	20	1.15385	1.26087	1.25		56598.3	Neutral amino acid transporter B(0) OS=Homo sapiens OX=9606 GN=SLC1A5 PE=1 SV=2
5138	TRUE	Q9H8M7|MINY3_HUMAN	66.2626	1	1	6	3	4	5	4	5	0.5	1.25	1.25	Oxidation (M)	49724.6	Ubiquitin carboxyl-terminal hydrolase MINDY-3 OS=Homo sapiens OX=9606 GN=MINDY3 PE=1 SV=1
3439	TRUE	Q99543|DNJC2_HUMAN	142.92	4	4	19	8	8	9	8	10	0.421053	1.125	1.25	Carbamidomethylation	71996.4	DnaJ homolog subfamily C member 2 OS=Homo sapiens OX=9606 GN=DNAJC2 PE=1 SV=4
2665	TRUE	Q9NWV4|CZIB_HUMAN	182.165	6	6	9	9	21	22	16	20	1	1.04762	1.25		18048.4	CXXC motif containing zinc binding protein OS=Homo sapiens OX=9606 GN=CZIB PE=1 SV=1
1580	TRUE	Q99426|TBCB_HUMAN	237.653	9	9	46	41	35	36	32	40	0.891304	1.02857	1.25	Carbamidomethylation	27325.5	Tubulin-folding cofactor B OS=Homo sapiens OX=9606 GN=TBCB PE=1 SV=2
4149	TRUE	P42694|HELZ_HUMAN	111.538	4	4	1	3	1	1	4	5	3	1	1.25		218970	Probable helicase with zinc finger domain OS=Homo sapiens OX=9606 GN=HELZ PE=1 SV=2
3584	TRUE	Q7L7V1|DHX32_HUMAN	136.802	3	3	6	9		1	12	15	1.5	1	1.25		84418.6	Putative pre-mRNA-splicing factor ATP-dependent RNA helicase DHX32 OS=Homo sapiens OX=9606 GN=DHX32 PE=1 SV=1
3664	TRUE	O15037|KHNYN_HUMAN	132.963	3	3	6	4	3	3	4	5	0.666667	1	1.25		74534	Protein KHNYN OS=Homo sapiens OX=9606 GN=KHNYN PE=1 SV=3
2535	TRUE	P21127|CD11B_HUMAN	188.173	6	1	13	11	8	7	8	10	0.846154	0.875	1.25	Carbamidomethylation	92619.9	Cyclin-dependent kinase 11B OS=Homo sapiens OX=9606 GN=CDK11B PE=1 SV=4
5049	TRUE	Q9UBS8|RNF14_HUMAN	69.8179	1	1	2	2	6	5	4	5	1	0.833333	1.25		53837.4	E3 ubiquitin-protein ligase RNF14 OS=Homo sapiens OX=9606 GN=RNF14 PE=1 SV=1
3545	TRUE	P48553|TPC10_HUMAN	138.285	7	7	6	11	4	3	4	5	1.83333	0.75	1.25	Carbamidomethylation; Oxidation (M)	142189	Trafficking protein particle complex subunit 10 OS=Homo sapiens OX=9606 GN=TRAPPC10 PE=1 SV=2
1596	TRUE	Q9P265|DIP2B_HUMAN	236.768	13	13	23	15	16	11	32	40	0.652174	0.6875	1.25		171492	Disco-interacting protein 2 homolog B OS=Homo sapiens OX=9606 GN=DIP2B PE=1 SV=3
4311	TRUE	Q15041|AR6P1_HUMAN	103.424	2	2	7	4	6	4	4	5	0.571429	0.666667	1.25	Carbamidomethylation	23362.8	ADP-ribosylation factor-like protein 6-interacting protein 1 OS=Homo sapiens OX=9606 GN=ARL6IP1 PE=1 SV=2
4144	TRUE	Q06265|EXOS9_HUMAN	111.706	3	3	9	11	7	4	4	5	1.22222	0.571429	1.25		48949	Exosome complex component RRP45 OS=Homo sapiens OX=9606 GN=EXOSC9 PE=1 SV=3
1117	FALSE	O60551|NMT2_HUMAN	81.6899	1	1	10	9	11	6	8	10	0.9	0.545455	1.25	Oxidation (M)	56980.2	Glycylpeptide N-tetradecanoyltransferase 2 OS=Homo sapiens OX=9606 GN=NMT2 PE=1 SV=1
4049	TRUE	P17096|HMGA1_HUMAN	116.073	2	2	4	7	10	5	4	5	1.75	0.5	1.25		11676	High mobility group protein HMG-I/HMG-Y OS=Homo sapiens OX=9606 GN=HMGA1 PE=1 SV=3
4004	TRUE	Q9P2D0|IBTK_HUMAN	117.625	3	3	9	10	2	1	4	5	1.11111	0.5	1.25		150528	Inhibitor of Bruton tyrosine kinase OS=Homo sapiens OX=9606 GN=IBTK PE=1 SV=3
1883	TRUE	P35573|GDE_HUMAN	220.679	12	12	27	24	26	12	20	25	0.888889	0.461538	1.25	Carbamidomethylation	174764	Glycogen debranching enzyme OS=Homo sapiens OX=9606 GN=AGL PE=1 SV=3
3697	TRUE	P15260|INGR1_HUMAN	131.454	4	4	16	18	11	5	4	5	1.125	0.454545	1.25	Carbamidomethylation	54404.5	Interferon gamma receptor 1 OS=Homo sapiens OX=9606 GN=IFNGR1 PE=1 SV=1
3435	TRUE	O75718|CRTAP_HUMAN	143.045	3	3	6	7	7	3	16	20	1.16667	0.428571	1.25	Carbamidomethylation	46561.9	Cartilage-associated protein OS=Homo sapiens OX=9606 GN=CRTAP PE=1 SV=1
4240	TRUE	Q15714|T22D1_HUMAN	106.862	2	1	12	10	7	2	4	5	0.833333	0.285714	1.25		109677	TSC22 domain family protein 1 OS=Homo sapiens OX=9606 GN=TSC22D1 PE=1 SV=3
4196	TRUE	Q9BSD7|NTPCR_HUMAN	109.067	3	3			8	2	4	5		0.25	1.25		20713.1	Cancer-related nucleoside-triphosphatase OS=Homo sapiens OX=9606 GN=NTPCR PE=1 SV=1
111	FALSE	P11532|DMD_HUMAN	105.225	2	2	3	4			4	5	1.33333		1.25		426750	Dystrophin OS=Homo sapiens OX=9606 GN=DMD PE=1 SV=3
1070	FALSE	Q15417|CNN3_HUMAN	72.5082	1	1	6	4			4	5	0.666667		1.25		36413.7	Calponin-3 OS=Homo sapiens OX=9606 GN=CNN3 PE=1 SV=1
4714	TRUE	A6NCE7|MP3B2_HUMAN	84.0022	2	2					4	5			1.25		14628	Microtubule-associated proteins 1A/1B light chain 3 beta 2 OS=Homo sapiens OX=9606 GN=MAP1LC3B2 PE=2 SV=1
4714	TRUE	Q9GZQ8|MLP3B_HUMAN	84.0022	2	2					4	5			1.25		14688	Microtubule-associated proteins 1A/1B light chain 3B OS=Homo sapiens OX=9606 GN=MAP1LC3B PE=1 SV=3
5134	TRUE	Q969F1|TF3C6_HUMAN	66.5152	1	1					4	5			1.25		24048.6	General transcription factor 3C polypeptide 6 OS=Homo sapiens OX=9606 GN=GTF3C6 PE=1 SV=1
674	TRUE	Q9UMZ2|SYNRG_HUMAN	307.951	21	21	60	41	66	41	65	81	0.683333	0.621212	1.24615	Oxidation (M); Carbamidomethylation	140654	Synergin gamma OS=Homo sapiens OX=9606 GN=SYNRG PE=1 SV=2
1522	TRUE	Q96FW1|OTUB1_HUMAN	240.925	9	9	38	34	30	37	37	46	0.894737	1.23333	1.24324	Oxidation (M); Carbamidomethylation	31284.1	Ubiquitin thioesterase OTUB1 OS=Homo sapiens OX=9606 GN=OTUB1 PE=1 SV=2
2109	TRUE	Q96KP1|EXOC2_HUMAN	209.711	9	9	20	31	22	26	33	41	1.55	1.18182	1.24242		104066	Exocyst complex component 2 OS=Homo sapiens OX=9606 GN=EXOC2 PE=1 SV=1
1385	TRUE	Q9UIJ7|KAD3_HUMAN	250.663	10	10	67	65	37	41	33	41	0.970149	1.10811	1.24242		25565.4	GTP:AMP phosphotransferase AK3, mitochondrial OS=Homo sapiens OX=9606 GN=AK3 PE=1 SV=4
2816	TRUE	Q6BDS2|URFB1_HUMAN	174.883	6	6	25	33	16	15	25	31	1.32	0.9375	1.24	Oxidation (M); Carbamidomethylation	159485	UHRF1-binding protein 1 OS=Homo sapiens OX=9606 GN=UHRF1BP1 PE=1 SV=1
2138	TRUE	O14744|ANM5_HUMAN	208.042	9	9	32	29	36	42	21	26	0.90625	1.16667	1.2381	Carbamidomethylation	72683.9	Protein arginine N-methyltransferase 5 OS=Homo sapiens OX=9606 GN=PRMT5 PE=1 SV=4
1547	TRUE	O60934|NBN_HUMAN	239.381	10	10	30	22	18	18	21	26	0.733333	1	1.2381	Carbamidomethylation; Oxidation (M)	84959	Nibrin OS=Homo sapiens OX=9606 GN=NBN PE=1 SV=1
569	FALSE	Q6ZT62|BGIN_HUMAN	287.184	18	18	62	76	67	71	118	146	1.22581	1.0597	1.23729	Oxidation (M); Carbamidomethylation	73599.5	Bargin OS=Homo sapiens OX=9606 GN=BARGIN PE=1 SV=2
3230	TRUE	O43617|TPPC3_HUMAN	153.809	4	4	23	17	3	15	17	21	0.73913	5	1.23529	Oxidation (M); Carbamidomethylation	20274.1	Trafficking protein particle complex subunit 3 OS=Homo sapiens OX=9606 GN=TRAPPC3 PE=1 SV=1
2530	TRUE	Q969G3|SMCE1_HUMAN	188.463	8	8	16	12	6	13	17	21	0.75	2.16667	1.23529	Oxidation (M)	46649.4	SWI/SNF-related matrix-associated actin-dependent regulator of chromatin subfamily E member 1 OS=Homo sapiens OX=9606 GN=SMARCE1 PE=1 SV=2
2573	TRUE	Q9NX08|COMD8_HUMAN	186.076	7	7	34	31	14	18	17	21	0.911765	1.28571	1.23529	Oxidation (M)	21090.4	COMM domain-containing protein 8 OS=Homo sapiens OX=9606 GN=COMMD8 PE=1 SV=1
1232	TRUE	P11310|ACADM_HUMAN	259.856	13	13	83	76	50	63	51	63	0.915663	1.26	1.23529	Carbamidomethylation; Oxidation (M)	46588.3	Medium-chain specific acyl-CoA dehydrogenase, mitochondrial OS=Homo sapiens OX=9606 GN=ACADM PE=1 SV=1
2767	TRUE	P37840|SYUA_HUMAN	177.667	3	3	18	17	16	15	17	21	0.944444	0.9375	1.23529		14460.2	Alpha-synuclein OS=Homo sapiens OX=9606 GN=SNCA PE=1 SV=1
2092	TRUE	Q9UHY1|NRBP_HUMAN	210.552	7	7	17	15	25	23	17	21	0.882353	0.92	1.23529	Oxidation (M); Carbamidomethylation	59844.7	Nuclear receptor-binding protein OS=Homo sapiens OX=9606 GN=NRBP1 PE=1 SV=1
3378	TRUE	P29353|SHC1_HUMAN	146.318	4	4	11	11	11	10	17	21	1	0.909091	1.23529	Oxidation (M)	62822.1	SHC-transforming protein 1 OS=Homo sapiens OX=9606 GN=SHC1 PE=1 SV=4
1959	TRUE	Q99471|PFD5_HUMAN	217.16	6	6	60	42	38	44	47	58	0.7	1.15789	1.23404	Oxidation (M)	17328.1	Prefoldin subunit 5 OS=Homo sapiens OX=9606 GN=PFDN5 PE=1 SV=2
1091	TRUE	Q9H845|ACAD9_HUMAN	270.804	15	15	50	48	28	25	30	37	0.96	0.892857	1.23333	Carbamidomethylation	68760.3	Complex I assembly factor ACAD9, mitochondrial OS=Homo sapiens OX=9606 GN=ACAD9 PE=1 SV=1
785	TRUE	Q9Y696|CLIC4_HUMAN	296.875	12	12	131	149	101	86	86	106	1.1374	0.851485	1.23256	Carbamidomethylation; Oxidation (M)	28772.1	Chloride intracellular channel protein 4 OS=Homo sapiens OX=9606 GN=CLIC4 PE=1 SV=4
470	TRUE	P16152|CBR1_HUMAN	332.329	16	14	96	106	90	104	108	133	1.10417	1.15556	1.23148	Carbamidomethylation; Oxidation (M)	30374.9	Carbonyl reductase [NADPH] 1 OS=Homo sapiens OX=9606 GN=CBR1 PE=1 SV=3
691	TRUE	P05120|PAI2_HUMAN	305.733	14	14	16	23	107	96	121	149	1.4375	0.897196	1.2314	Oxidation (M); Carbamidomethylation	46596.2	Plasminogen activator inhibitor 2 OS=Homo sapiens OX=9606 GN=SERPINB2 PE=1 SV=2
2887	TRUE	Q8IUR7|ARMC8_HUMAN	171.3	7	7	8	17	3	7	13	16	2.125	2.33333	1.23077	Carbamidomethylation	75509.3	Armadillo repeat-containing protein 8 OS=Homo sapiens OX=9606 GN=ARMC8 PE=1 SV=2
1621	TRUE	P49821|NDUV1_HUMAN	235.307	9	9	51	61	25	33	26	32	1.19608	1.32	1.23077	Carbamidomethylation; Oxidation (M)	50817.1	NADH dehydrogenase [ubiquinone] flavoprotein 1, mitochondrial OS=Homo sapiens OX=9606 GN=NDUFV1 PE=1 SV=4
2635	TRUE	O95870|ABHGA_HUMAN	183.727	10	10	10	14	16	20	26	32	1.4	1.25	1.23077	Oxidation (M); Carbamidomethylation	63243.3	Phosphatidylserine lipase ABHD16A OS=Homo sapiens OX=9606 GN=ABHD16A PE=1 SV=3
3408	TRUE	P48736|PK3CG_HUMAN	144.829	6	6	6	9	13	12	13	16	1.5	0.923077	1.23077		126454	Phosphatidylinositol 4,5-bisphosphate 3-kinase catalytic subunit gamma isoform OS=Homo sapiens OX=9606 GN=PIK3CG PE=1 SV=3
1553	TRUE	P14209|CD99_HUMAN	239.16	8	8	41	44	38	26	26	32	1.07317	0.684211	1.23077	Oxidation (M)	18847.9	CD99 antigen OS=Homo sapiens OX=9606 GN=CD99 PE=1 SV=1
3262	TRUE	O95182|NDUA7_HUMAN	151.783	4	4	19	17	9	5	13	16	0.894737	0.555556	1.23077	Carbamidomethylation	12551.4	NADH dehydrogenase [ubiquinone] 1 alpha subcomplex subunit 7 OS=Homo sapiens OX=9606 GN=NDUFA7 PE=1 SV=3
1643	TRUE	Q96AT9|RPE_HUMAN	234.187	8	8	52	48	48	59	35	43	0.923077	1.22917	1.22857	Carbamidomethylation; Oxidation (M)	24927.7	Ribulose-phosphate 3-epimerase OS=Homo sapiens OX=9606 GN=RPE PE=1 SV=1
1867	TRUE	P35754|GLRX1_HUMAN	221.914	5	5	56	53	41	43	44	54	0.946429	1.04878	1.22727	Carbamidomethylation	11775.7	Glutaredoxin-1 OS=Homo sapiens OX=9606 GN=GLRX PE=1 SV=2
2749	TRUE	Q9BY32|ITPA_HUMAN	178.563	5	5	17	18	27	23	22	27	1.05882	0.851852	1.22727	Carbamidomethylation	21445.7	Inosine triphosphate pyrophosphatase OS=Homo sapiens OX=9606 GN=ITPA PE=1 SV=2
1608	TRUE	O60645|EXOC3_HUMAN	236.178	10	10	22	25	20	16	22	27	1.13636	0.8	1.22727	Oxidation (M)	85567.4	Exocyst complex component 3 OS=Homo sapiens OX=9606 GN=EXOC3 PE=1 SV=3
2489	TRUE	Q99700|ATX2_HUMAN	190.821	8	8	7	6	12	8	22	27	0.857143	0.666667	1.22727	Carbamidomethylation; Oxidation (M)	140283	Ataxin-2 OS=Homo sapiens OX=9606 GN=ATXN2 PE=1 SV=2
775	TRUE	Q8N1F7|NUP93_HUMAN	297.878	18	18	45	38	63	70	53	65	0.844444	1.11111	1.22642	Carbamidomethylation; Oxidation (M)	93488.3	Nuclear pore complex protein Nup93 OS=Homo sapiens OX=9606 GN=NUP93 PE=1 SV=2
458	TRUE	P06737|PYGL_HUMAN	334.05	22	19	133	118	79	87	106	130	0.887218	1.10127	1.22642	Oxidation (M); Carbamidomethylation	97148.6	Glycogen phosphorylase, liver form OS=Homo sapiens OX=9606 GN=PYGL PE=1 SV=4
1417	TRUE	P34949|MPI_HUMAN	248.134	11	11	39	64	43	33	31	38	1.64103	0.767442	1.22581	Carbamidomethylation; Oxidation (M)	46655.9	Mannose-6-phosphate isomerase OS=Homo sapiens OX=9606 GN=MPI PE=1 SV=2
504	TRUE	Q68EM7|RHG17_HUMAN	328.765	22	22	67	67	86	78	71	87	1	0.906977	1.22535	Carbamidomethylation; Oxidation (M)	95436.7	Rho GTPase-activating protein 17 OS=Homo sapiens OX=9606 GN=ARHGAP17 PE=1 SV=1
270	TRUE	Q7Z6Z7|HUWE1_HUMAN	365.78	38	38	63	88	98	76	76	93	1.39683	0.77551	1.22368	Carbamidomethylation; Oxidation (M)	481891	E3 ubiquitin-protein ligase HUWE1 OS=Homo sapiens OX=9606 GN=HUWE1 PE=1 SV=3
3689	TRUE	Q15628|TRADD_HUMAN	131.768	3	3	11	10	8	20	9	11	0.909091	2.5	1.22222	Oxidation (M)	34247	Tumor necrosis factor receptor type 1-associated DEATH domain protein OS=Homo sapiens OX=9606 GN=TRADD PE=1 SV=2
4108	TRUE	P49795|RGS19_HUMAN	113.515	2	2	23	16	5	7	9	11	0.695652	1.4	1.22222	Oxidation (M)	24635.6	Regulator of G-protein signaling 19 OS=Homo sapiens OX=9606 GN=RGS19 PE=1 SV=1
1775	TRUE	Q13033|STRN3_HUMAN	227.039	9	9	39	39	18	25	27	33	1	1.38889	1.22222		87209.3	Striatin-3 OS=Homo sapiens OX=9606 GN=STRN3 PE=1 SV=3
3063	TRUE	Q86YV9|HPS6_HUMAN	161.923	5	5	11	5	12	14	9	11	0.454545	1.16667	1.22222	Carbamidomethylation	82974.8	Hermansky-Pudlak syndrome 6 protein OS=Homo sapiens OX=9606 GN=HPS6 PE=1 SV=1
334	TRUE	Q9Y4K1|CRBG1_HUMAN	353.698	31	31	124	157	106	122	72	88	1.26613	1.15094	1.22222	Carbamidomethylation; Oxidation (M)	188676	Beta/gamma crystallin domain-containing protein 1 OS=Homo sapiens OX=9606 GN=CRYBG1 PE=1 SV=3
193	TRUE	Q14974|IMB1_HUMAN	382.641	35	35	195	196	201	225	207	253	1.00513	1.1194	1.22222	Oxidation (M); Carbamidomethylation	97170.2	Importin subunit beta-1 OS=Homo sapiens OX=9606 GN=KPNB1 PE=1 SV=2
1230	TRUE	Q14498|RBM39_HUMAN	260.113	9	9	25	44	52	54	36	44	1.76	1.03846	1.22222	Oxidation (M); Carbamidomethylation	59379.6	RNA-binding protein 39 OS=Homo sapiens OX=9606 GN=RBM39 PE=1 SV=2
3355	TRUE	Q8IWV7|UBR1_HUMAN	147.634	4	4	13	7	5	4	18	22	0.538462	0.8	1.22222	Carbamidomethylation; Oxidation (M)	200211	E3 ubiquitin-protein ligase UBR1 OS=Homo sapiens OX=9606 GN=UBR1 PE=1 SV=1
3214	TRUE	Q9Y2W2|WBP11_HUMAN	154.799	3	3	13	15	14	11	9	11	1.15385	0.785714	1.22222	Oxidation (M)	69997.6	WW domain-binding protein 11 OS=Homo sapiens OX=9606 GN=WBP11 PE=1 SV=1
2222	TRUE	O00221|IKBE_HUMAN	203.854	7	7	15	15	25	15	18	22	1	0.6	1.22222	Carbamidomethylation	52863.5	NF-kappa-B inhibitor epsilon OS=Homo sapiens OX=9606 GN=NFKBIE PE=1 SV=3
3636	TRUE	P27987|IP3KB_HUMAN	133.992	4	4	8	5	10	5	9	11	0.625	0.5	1.22222	Oxidation (M)	102376	Inositol-trisphosphate 3-kinase B OS=Homo sapiens OX=9606 GN=ITPKB PE=1 SV=5
4269	TRUE	Q8WUK0|PTPM1_HUMAN	105.878	2	2	4	2			9	11	0.5		1.22222		22843.6	Phosphatidylglycerophosphatase and protein-tyrosine phosphatase 1 OS=Homo sapiens OX=9606 GN=PTPMT1 PE=1 SV=1
4369	TRUE	Q5T3F8|CSCL2_HUMAN	100.254	2	2	5	2			9	11	0.4		1.22222		94958.3	CSC1-like protein 2 OS=Homo sapiens OX=9606 GN=TMEM63B PE=1 SV=1
262	TRUE	P09104|ENOG_HUMAN	367.489	25	16	164	133	237	184	204	249	0.810976	0.776371	1.22059	Carbamidomethylation; Oxidation (M)	47268.6	Gamma-enolase OS=Homo sapiens OX=9606 GN=ENO2 PE=1 SV=3
768	TRUE	P56192|SYMC_HUMAN	298.528	20	20	60	62	56	70	59	72	1.03333	1.25	1.22034	Carbamidomethylation; Oxidation (M)	101116	Methionine--tRNA ligase, cytoplasmic OS=Homo sapiens OX=9606 GN=MARS1 PE=1 SV=2
1386	TRUE	Q8NEB9|PK3C3_HUMAN	250.604	11	11	30	30	46	41	41	50	1	0.891304	1.21951	Carbamidomethylation; Oxidation (M)	101549	Phosphatidylinositol 3-kinase catalytic subunit type 3 OS=Homo sapiens OX=9606 GN=PIK3C3 PE=1 SV=1
2068	TRUE	Q92851|CASPA_HUMAN	211.799	7	7	19	34	12	32	32	39	1.78947	2.66667	1.21875	Oxidation (M)	58950.6	Caspase-10 OS=Homo sapiens OX=9606 GN=CASP10 PE=1 SV=3
644	FALSE	Q9GZV4|IF5A2_HUMAN	213.81	4	4	52	58	35	45	55	67	1.11538	1.28571	1.21818	Carbamidomethylation; Oxidation (M)	16793.2	Eukaryotic translation initiation factor 5A-2 OS=Homo sapiens OX=9606 GN=EIF5A2 PE=1 SV=3
106	TRUE	Q709C8|VP13C_HUMAN	416.759	68	68	181	178	141	191	225	274	0.983425	1.35461	1.21778	Carbamidomethylation; Oxidation (M)	422390	Vacuolar protein sorting-associated protein 13C OS=Homo sapiens OX=9606 GN=VPS13C PE=1 SV=1
937	TRUE	P39687|AN32A_HUMAN	282.458	12	10	57	64	38	47	46	56	1.12281	1.23684	1.21739	Carbamidomethylation	28585.4	Acidic leucine-rich nuclear phosphoprotein 32 family member A OS=Homo sapiens OX=9606 GN=ANP32A PE=1 SV=1
857	TRUE	P48637|GSHB_HUMAN	289.664	14	14	79	82	108	69	69	84	1.03797	0.638889	1.21739	Carbamidomethylation; Oxidation (M)	52384.8	Glutathione synthetase OS=Homo sapiens OX=9606 GN=GSS PE=1 SV=1
865	TRUE	P36873|PP1G_HUMAN	288.885	11	1	48	44	45	48	51	62	0.916667	1.06667	1.21569	Carbamidomethylation; Oxidation (M)	36983.8	Serine/threonine-protein phosphatase PP1-gamma catalytic subunit OS=Homo sapiens OX=9606 GN=PPP1CC PE=1 SV=1
2354	TRUE	O95674|CDS2_HUMAN	196.952	4	4	20	23	16	25	14	17	1.15	1.5625	1.21429		51418	Phosphatidate cytidylyltransferase 2 OS=Homo sapiens OX=9606 GN=CDS2 PE=1 SV=1
1387	TRUE	P28070|PSB4_HUMAN	250.484	8	8	56	60	74	101	70	85	1.07143	1.36486	1.21429	Oxidation (M)	29204.2	Proteasome subunit beta type-4 OS=Homo sapiens OX=9606 GN=PSMB4 PE=1 SV=4
3964	TRUE	Q9NRR3|C42S2_HUMAN	119.51	2	2	16	21	24	32	28	34	1.3125	1.33333	1.21429	Oxidation (M)	9223.49	CDC42 small effector protein 2 OS=Homo sapiens OX=9606 GN=CDC42SE2 PE=1 SV=1
2698	TRUE	Q14241|ELOA1_HUMAN	180.962	5	5	10	21	11	14	14	17	2.1	1.27273	1.21429	Oxidation (M)	89908.8	Elongin-A OS=Homo sapiens OX=9606 GN=ELOA PE=1 SV=2
1985	TRUE	P11172|UMPS_HUMAN	215.922	8	8	36	30	28	25	28	34	0.833333	0.892857	1.21429	Carbamidomethylation	52221.6	Uridine 5'-monophosphate synthase OS=Homo sapiens OX=9606 GN=UMPS PE=1 SV=1
2355	TRUE	P45985|MP2K4_HUMAN	196.946	5	5	14	17	24	12	14	17	1.21429	0.5	1.21429	Carbamidomethylation	44287.7	Dual specificity mitogen-activated protein kinase kinase 4 OS=Homo sapiens OX=9606 GN=MAP2K4 PE=1 SV=1
1529	TRUE	O60879|DIAP2_HUMAN	240.396	12	12	15	18			28	34	1.2		1.21429	Carbamidomethylation	125569	Protein diaphanous homolog 2 OS=Homo sapiens OX=9606 GN=DIAPH2 PE=1 SV=1
1079	TRUE	Q9NXV6|CARF_HUMAN	271.723	14	14	34	29	25	28	47	57	0.852941	1.12	1.21277	Carbamidomethylation	61124.9	CDKN2A-interacting protein OS=Homo sapiens OX=9606 GN=CDKN2AIP PE=1 SV=3
1183	TRUE	P55008|AIF1_HUMAN	263.834	8	8	82	112	64	89	113	137	1.36585	1.39062	1.21239	Oxidation (M)	16703.3	Allograft inflammatory factor 1 OS=Homo sapiens OX=9606 GN=AIF1 PE=1 SV=1
1479	TRUE	Q9UHW9|S12A6_HUMAN	244.199	8	8	38	24	31	33	33	40	0.631579	1.06452	1.21212	Oxidation (M)	127617	Solute carrier family 12 member 6 OS=Homo sapiens OX=9606 GN=SLC12A6 PE=1 SV=2
1816	TRUE	Q13907|IDI1_HUMAN	224.317	8	8	40	32	53	42	52	63	0.8	0.792453	1.21154	Carbamidomethylation	26319.2	Isopentenyl-diphosphate Delta-isomerase 1 OS=Homo sapiens OX=9606 GN=IDI1 PE=1 SV=2
2774	TRUE	Q9NR19|ACSA_HUMAN	177.13	7	7	14	16	11	20	19	23	1.14286	1.81818	1.21053	Oxidation (M)	78579.6	Acetyl-coenzyme A synthetase, cytoplasmic OS=Homo sapiens OX=9606 GN=ACSS2 PE=1 SV=1
3049	TRUE	Q6UW68|TM205_HUMAN	162.572	5	5	6	9	8	12	19	23	1.5	1.5	1.21053	Oxidation (M)	21197.8	Transmembrane protein 205 OS=Homo sapiens OX=9606 GN=TMEM205 PE=1 SV=1
1691	TRUE	Q9UGI8|TES_HUMAN	231.654	9	9	30	34	23	22	19	23	1.13333	0.956522	1.21053	Carbamidomethylation; Oxidation (M)	47996.4	Testin OS=Homo sapiens OX=9606 GN=TES PE=1 SV=1
2318	TRUE	P25098|ARBK1_HUMAN	198.681	11	8	21	23	29	20	19	23	1.09524	0.689655	1.21053	Carbamidomethylation	79573.6	Beta-adrenergic receptor kinase 1 OS=Homo sapiens OX=9606 GN=GRK2 PE=1 SV=2
379	TRUE	P22102|PUR2_HUMAN	345.382	26	26	84	88	94	78	91	110	1.04762	0.829787	1.20879	Carbamidomethylation; Oxidation (M)	107767	Trifunctional purine biosynthetic protein adenosine-3 OS=Homo sapiens OX=9606 GN=GART PE=1 SV=1
167	TRUE	P20700|LMNB1_HUMAN	390.826	46	43	231	249	150	239	206	249	1.07792	1.59333	1.20874	Carbamidomethylation; Oxidation (M)	66408.3	Lamin-B1 OS=Homo sapiens OX=9606 GN=LMNB1 PE=1 SV=2
1612	TRUE	Q92734|TFG_HUMAN	235.864	7	7	40	35	57	77	48	58	0.875	1.35088	1.20833	Oxidation (M)	43447.9	Protein TFG OS=Homo sapiens OX=9606 GN=TFG PE=1 SV=2
847	TRUE	Q00169|PIPNA_HUMAN	290.26	11	10	63	44	32	39	48	58	0.698413	1.21875	1.20833	Carbamidomethylation; Oxidation (M)	31806.3	Phosphatidylinositol transfer protein alpha isoform OS=Homo sapiens OX=9606 GN=PITPNA PE=1 SV=2
1871	TRUE	P53602|MVD1_HUMAN	221.629	8	8	7	6	23	27	24	29	0.857143	1.17391	1.20833	Oxidation (M); Carbamidomethylation	43404.6	Diphosphomevalonate decarboxylase OS=Homo sapiens OX=9606 GN=MVD PE=1 SV=1
1911	TRUE	Q8NI08|NCOA7_HUMAN	219.525	14	14	20	19	14	9	24	29	0.95	0.642857	1.20833	Carbamidomethylation	106162	Nuclear receptor coactivator 7 OS=Homo sapiens OX=9606 GN=NCOA7 PE=1 SV=2
317	TRUE	P45974|UBP5_HUMAN	356.403	30	30	117	121	121	123	125	151	1.03419	1.01653	1.208	Carbamidomethylation; Oxidation (M)	95786.3	Ubiquitin carboxyl-terminal hydrolase 5 OS=Homo sapiens OX=9606 GN=USP5 PE=1 SV=2
831	TRUE	Q5TEJ8|THMS2_HUMAN	291.4	15	15	48	40	40	47	58	70	0.833333	1.175	1.2069	Carbamidomethylation; Oxidation (M)	72048.6	Protein THEMIS2 OS=Homo sapiens OX=9606 GN=THEMIS2 PE=1 SV=1
364	TRUE	P00390|GSHR_HUMAN	347.432	22	22	138	120	123	120	116	140	0.869565	0.97561	1.2069	Carbamidomethylation; Oxidation (M)	56257	Glutathione reductase, mitochondrial OS=Homo sapiens OX=9606 GN=GSR PE=1 SV=2
908	TRUE	Q9H444|CHM4B_HUMAN	285.042	12	12	103	104	84	73	87	105	1.00971	0.869048	1.2069	Oxidation (M)	24950.2	Charged multivesicular body protein 4b OS=Homo sapiens OX=9606 GN=CHMP4B PE=1 SV=1
2206	TRUE	P20933|ASPG_HUMAN	204.651	7	7	29	23	16	27	34	41	0.793103	1.6875	1.20588	Oxidation (M)	37208.3	N(4)-(beta-N-acetylglucosaminyl)-L-asparaginase OS=Homo sapiens OX=9606 GN=AGA PE=1 SV=2
569	TRUE	Q9Y3L3|3BP1_HUMAN	320.171	21	21	73	87	73	80	136	164	1.19178	1.09589	1.20588	Oxidation (M); Carbamidomethylation	75713.2	SH3 domain-binding protein 1 OS=Homo sapiens OX=9606 GN=SH3BP1 PE=1 SV=3
1561	TRUE	P27361|MK03_HUMAN	238.642	8	5	45	47	26	24	34	41	1.04444	0.923077	1.20588	Oxidation (M); Carbamidomethylation	43135.6	Mitogen-activated protein kinase 3 OS=Homo sapiens OX=9606 GN=MAPK3 PE=1 SV=4
527	TRUE	Q9NQW7|XPP1_HUMAN	325.617	22	22	85	80	70	92	117	141	0.941176	1.31429	1.20513	Oxidation (M); Carbamidomethylation	69917.8	Xaa-Pro aminopeptidase 1 OS=Homo sapiens OX=9606 GN=XPNPEP1 PE=1 SV=3
1354	TRUE	Q05086|UBE3A_HUMAN	252.364	8	8	28	32	29	27	39	47	1.14286	0.931034	1.20513	Carbamidomethylation; Oxidation (M)	100688	Ubiquitin-protein ligase E3A OS=Homo sapiens OX=9606 GN=UBE3A PE=1 SV=4
1139	TRUE	O00560|SDCB1_HUMAN	267.711	8	8	64	74	83	76	78	94	1.15625	0.915663	1.20513	Oxidation (M); Carbamidomethylation	32444.4	Syntenin-1 OS=Homo sapiens OX=9606 GN=SDCBP PE=1 SV=1
615	TRUE	P05109|S10A8_HUMAN	314.534	22	22	138	172	173	223	347	417	1.24638	1.28902	1.20173	Oxidation (M); Carbamidomethylation	10834.5	Protein S100-A8 OS=Homo sapiens OX=9606 GN=S100A8 PE=1 SV=1
5446	TRUE	P19793|RXRA_HUMAN	54.6532	1	1		8		3	5	6	8	3	1.2		50811.3	Retinoic acid receptor RXR-alpha OS=Homo sapiens OX=9606 GN=RXRA PE=1 SV=1
5446	TRUE	P28702|RXRB_HUMAN	54.6532	1	1		8		3	5	6	8	3	1.2		56921.9	Retinoic acid receptor RXR-beta OS=Homo sapiens OX=9606 GN=RXRB PE=1 SV=2
5446	TRUE	P48443|RXRG_HUMAN	54.6532	1	1		8		3	5	6	8	3	1.2		50871.2	Retinoic acid receptor RXR-gamma OS=Homo sapiens OX=9606 GN=RXRG PE=1 SV=1
4871	TRUE	Q96I51|RCC1L_HUMAN	77.1264	1	1	8	3		3	5	6	0.375	3	1.2		49996.8	RCC1-like G exchanging factor-like protein OS=Homo sapiens OX=9606 GN=RCC1L PE=1 SV=2
2678	TRUE	Q7L099|RUFY3_HUMAN	181.794	8	8	14	11	8	22	20	24	0.785714	2.75	1.2		52964.9	Protein RUFY3 OS=Homo sapiens OX=9606 GN=RUFY3 PE=1 SV=1
2560	TRUE	Q9UI09|NDUAC_HUMAN	186.693	6	6	39	38	6	16	15	18	0.974359	2.66667	1.2		17114.4	NADH dehydrogenase [ubiquinone] 1 alpha subcomplex subunit 12 OS=Homo sapiens OX=9606 GN=NDUFA12 PE=1 SV=1
3087	TRUE	Q9NZI7|UBIP1_HUMAN	160.799	4	3	10	19	2	5	10	12	1.9	2.5	1.2		60491	Upstream-binding protein 1 OS=Homo sapiens OX=9606 GN=UBP1 PE=1 SV=1
4029	TRUE	Q8IXK2|GLT12_HUMAN	116.684	3	3	22	16	4	10	5	6	0.727273	2.5	1.2		66938.3	Polypeptide N-acetylgalactosaminyltransferase 12 OS=Homo sapiens OX=9606 GN=GALNT12 PE=1 SV=3
2604	TRUE	Q16740|CLPP_HUMAN	184.835	6	6	24	32	25	37	25	30	1.33333	1.48	1.2	Oxidation (M)	30180	ATP-dependent Clp protease proteolytic subunit, mitochondrial OS=Homo sapiens OX=9606 GN=CLPP PE=1 SV=1
1528	TRUE	P30876|RPB2_HUMAN	240.415	13	13	23	19	16	22	30	36	0.826087	1.375	1.2	Oxidation (M)	133897	DNA-directed RNA polymerase II subunit RPB2 OS=Homo sapiens OX=9606 GN=POLR2B PE=1 SV=1
741	TRUE	P23141|EST1_HUMAN	301.357	19	19	56	66	99	136	105	126	1.17857	1.37374	1.2	Oxidation (M); Carbamidomethylation	62521.1	Liver carboxylesterase 1 OS=Homo sapiens OX=9606 GN=CES1 PE=1 SV=2
3361	TRUE	Q8IWA0|WDR75_HUMAN	147.475	3	3	21	18	7	9	15	18	0.857143	1.28571	1.2		94498.8	WD repeat-containing protein 75 OS=Homo sapiens OX=9606 GN=WDR75 PE=1 SV=1
4511	TRUE	P56211|ARP19_HUMAN	93.5594	2	1	6	5	7	9	5	6	0.833333	1.28571	1.2	Oxidation (M)	12323	cAMP-regulated phosphoprotein 19 OS=Homo sapiens OX=9606 GN=ARPP19 PE=1 SV=2
5121	TRUE	O00483|NDUA4_HUMAN	66.9987	1	1	12	8	4	5	5	6	0.666667	1.25	1.2		9369.86	Cytochrome c oxidase subunit NDUFA4 OS=Homo sapiens OX=9606 GN=NDUFA4 PE=1 SV=1
3211	TRUE	P33316|DUT_HUMAN	154.982	6	6	11	6	8	10	10	12	0.545455	1.25	1.2	Carbamidomethylation	26563.2	Deoxyuridine 5'-triphosphate nucleotidohydrolase, mitochondrial OS=Homo sapiens OX=9606 GN=DUT PE=1 SV=4
4046	TRUE	Q9Y2L1|RRP44_HUMAN	116.267	5	5	7	10	6	7	5	6	1.42857	1.16667	1.2	Carbamidomethylation	109003	Exosome complex exonuclease RRP44 OS=Homo sapiens OX=9606 GN=DIS3 PE=1 SV=2
2487	TRUE	Q9GZT6|CC90B_HUMAN	190.921	6	6	11	13	9	10	5	6	1.18182	1.11111	1.2	Oxidation (M)	29505.6	Coiled-coil domain-containing protein 90B, mitochondrial OS=Homo sapiens OX=9606 GN=CCDC90B PE=1 SV=2
4219	TRUE	Q9NZJ7|MTCH1_HUMAN	107.899	4	4	9	8	11	12	5	6	0.888889	1.09091	1.2	Oxidation (M)	41544.2	Mitochondrial carrier homolog 1 OS=Homo sapiens OX=9606 GN=MTCH1 PE=1 SV=1
2335	TRUE	P49720|PSB3_HUMAN	198.065	5	5	5	20	26	27	20	24	4	1.03846	1.2	Oxidation (M)	22948.9	Proteasome subunit beta type-3 OS=Homo sapiens OX=9606 GN=PSMB3 PE=1 SV=2
1908	TRUE	Q9Y217|MTMR6_HUMAN	219.823	9	9	24	30	26	27	25	30	1.25	1.03846	1.2		71967.9	Myotubularin-related protein 6 OS=Homo sapiens OX=9606 GN=MTMR6 PE=1 SV=3
5781	TRUE	Q8NFW1|COMA1_HUMAN	37.708	1	1		2		1	5	6	2	1	1.2		161145	Collagen alpha-1(XXII) chain OS=Homo sapiens OX=9606 GN=COL22A1 PE=2 SV=2
3980	TRUE	Q5T440|CAF17_HUMAN	118.661	2	2	5	5	1	1	5	6	1	1	1.2		38155	Putative transferase CAF17, mitochondrial OS=Homo sapiens OX=9606 GN=IBA57 PE=1 SV=1
4974	TRUE	Q8WWI5|CTL1_HUMAN	72.7687	1	1	4	3	1		5	6	0.75	1	1.2	Carbamidomethylation	73302.1	Choline transporter-like protein 1 OS=Homo sapiens OX=9606 GN=SLC44A1 PE=1 SV=1
4716	TRUE	O95619|YETS4_HUMAN	83.8843	1	1			1		5	6		1	1.2		26499.5	YEATS domain-containing protein 4 OS=Homo sapiens OX=9606 GN=YEATS4 PE=1 SV=1
2474	TRUE	Q9H1B7|I2BPL_HUMAN	191.59	7	6	18	20	31	30	20	24	1.11111	0.967742	1.2	Carbamidomethylation; Oxidation (M)	82658.8	Probable E3 ubiquitin-protein ligase IRF2BPL OS=Homo sapiens OX=9606 GN=IRF2BPL PE=1 SV=1
3776	TRUE	P62304|RUXE_HUMAN	127.805	3	3	6	6	13	12	10	12	1	0.923077	1.2	Carbamidomethylation; Oxidation (M)	10803.6	Small nuclear ribonucleoprotein E OS=Homo sapiens OX=9606 GN=SNRPE PE=1 SV=1
3379	TRUE	C9J7I0|UMAD1_HUMAN	146.171	3	3	5	10	9	8	10	12	2	0.888889	1.2	Oxidation (M)	15199.8	UBAP1-MVB12-associated (UMA)-domain containing protein 1 OS=Homo sapiens OX=9606 GN=UMAD1 PE=1 SV=2
3043	TRUE	Q9NPB8|GPCP1_HUMAN	162.961	5	5	21	14	7	6	10	12	0.666667	0.857143	1.2		76034.9	Glycerophosphocholine phosphodiesterase GPCPD1 OS=Homo sapiens OX=9606 GN=GPCPD1 PE=1 SV=2
851	TRUE	Q9UQE7|SMC3_HUMAN	289.954	23	23	75	54	43	36	50	60	0.72	0.837209	1.2	Oxidation (M)	141542	Structural maintenance of chromosomes protein 3 OS=Homo sapiens OX=9606 GN=SMC3 PE=1 SV=2
3492	TRUE	P53611|PGTB2_HUMAN	140.918	3	3	9	13	6	5	10	12	1.44444	0.833333	1.2	Carbamidomethylation	36924.4	Geranylgeranyl transferase type-2 subunit beta OS=Homo sapiens OX=9606 GN=RABGGTB PE=1 SV=2
1352	TRUE	P11233|RALA_HUMAN	252.553	9	6	67	83	62	51	40	48	1.23881	0.822581	1.2	Oxidation (M); Carbamidomethylation	23566.8	Ras-related protein Ral-A OS=Homo sapiens OX=9606 GN=RALA PE=1 SV=1
1927	TRUE	P78536|ADA17_HUMAN	219.109	8	8	22	18	18	13	20	24	0.818182	0.722222	1.2	Carbamidomethylation; Oxidation (M)	93020.9	Disintegrin and metalloproteinase domain-containing protein 17 OS=Homo sapiens OX=9606 GN=ADAM17 PE=1 SV=1
3226	TRUE	Q6PML9|ZNT9_HUMAN	153.976	4	4	8	11	3	2	5	6	1.375	0.666667	1.2		63515.1	Zinc transporter 9 OS=Homo sapiens OX=9606 GN=SLC30A9 PE=1 SV=1
1444	TRUE	Q2M2I8|AAK1_HUMAN	246.548	10	10	17	24	34	22	35	42	1.41176	0.647059	1.2		103885	AP2-associated protein kinase 1 OS=Homo sapiens OX=9606 GN=AAK1 PE=1 SV=3
2686	TRUE	P30566|PUR8_HUMAN	181.335	6	6	18	14	26	15	25	30	0.777778	0.576923	1.2	Oxidation (M)	54889.3	Adenylosuccinate lyase OS=Homo sapiens OX=9606 GN=ADSL PE=1 SV=2
3272	TRUE	Q8NCA5|FA98A_HUMAN	150.937	3	3	6	10	12	6	10	12	1.66667	0.5	1.2		55272.5	Protein FAM98A OS=Homo sapiens OX=9606 GN=FAM98A PE=1 SV=2
2609	TRUE	Q7L5N1|CSN6_HUMAN	184.706	6	6	5	10	10	4	15	18	2	0.4	1.2	Oxidation (M); Carbamidomethylation	36163.5	COP9 signalosome complex subunit 6 OS=Homo sapiens OX=9606 GN=COPS6 PE=1 SV=1
3425	TRUE	Q8N0W3|FCSK_HUMAN	143.912	4	4	13	4	5	2	5	6	0.307692	0.4	1.2		117623	L-fucose kinase OS=Homo sapiens OX=9606 GN=FCSK PE=1 SV=2
4277	TRUE	Q5XKK7|F219B_HUMAN	105.488	1	1	7	10	3		5	6	1.42857	0.333333	1.2		21102.6	Protein FAM219B OS=Homo sapiens OX=9606 GN=FAM219B PE=1 SV=1
2596	TRUE	Q9UG63|ABCF2_HUMAN	185.196	7	7	6	6	10	3	10	12	1	0.3	1.2	Carbamidomethylation	71290.3	ATP-binding cassette sub-family F member 2 OS=Homo sapiens OX=9606 GN=ABCF2 PE=1 SV=2
3452	TRUE	Q9UHJ6|SHPK_HUMAN	142.47	4	4	9	11	8	2	5	6	1.22222	0.25	1.2		51490.8	Sedoheptulokinase OS=Homo sapiens OX=9606 GN=SHPK PE=1 SV=3
4308	TRUE	Q9ULP9|TBC24_HUMAN	103.592	2	2	1	2			10	12	2		1.2	Carbamidomethylation	62919.5	TBC1 domain family member 24 OS=Homo sapiens OX=9606 GN=TBC1D24 PE=1 SV=2
3732	TRUE	P30273|FCERG_HUMAN	130.097	3	3	36	53			5	6	1.47222		1.2		9667.47	High affinity immunoglobulin epsilon receptor subunit gamma OS=Homo sapiens OX=9606 GN=FCER1G PE=1 SV=1
4478	TRUE	O75030|MITF_HUMAN	95.4773	2	2	8	5			5	6	0.625		1.2		58795.5	Microphthalmia-associated transcription factor OS=Homo sapiens OX=9606 GN=MITF PE=1 SV=2
5175	TRUE	P43378|PTN9_HUMAN	64.8571	1	1					5	6			1.2		68020	Tyrosine-protein phosphatase non-receptor type 9 OS=Homo sapiens OX=9606 GN=PTPN9 PE=1 SV=1
302	TRUE	P41218|MNDA_HUMAN	357.999	25	25	114	173	106	138	112	134	1.51754	1.30189	1.19643	Oxidation (M); Carbamidomethylation	45836.1	Myeloid cell nuclear differentiation antigen OS=Homo sapiens OX=9606 GN=MNDA PE=1 SV=1
606	TRUE	Q9Y5X1|SNX9_HUMAN	315.277	15	15	64	75	41	45	56	67	1.17188	1.09756	1.19643	Oxidation (M); Carbamidomethylation	66591.6	Sorting nexin-9 OS=Homo sapiens OX=9606 GN=SNX9 PE=1 SV=1
1591	TRUE	P17252|KPCA_HUMAN	236.979	11	7	64	58	54	37	51	61	0.90625	0.685185	1.19608	Carbamidomethylation; Oxidation (M)	76749.9	Protein kinase C alpha type OS=Homo sapiens OX=9606 GN=PRKCA PE=1 SV=4
1191	TRUE	Q9UHD9|UBQL2_HUMAN	263.172	12	5	22	30	23	22	46	55	1.36364	0.956522	1.19565		65696.1	Ubiquilin-2 OS=Homo sapiens OX=9606 GN=UBQLN2 PE=1 SV=2
1281	TRUE	Q9UJW0|DCTN4_HUMAN	256.558	10	10	43	45	45	47	41	49	1.04651	1.04444	1.19512	Carbamidomethylation; Oxidation (M)	52337.1	Dynactin subunit 4 OS=Homo sapiens OX=9606 GN=DCTN4 PE=1 SV=1
1136	TRUE	P51570|GALK1_HUMAN	267.973	13	13	24	25	31	43	36	43	1.04167	1.3871	1.19444	Oxidation (M); Carbamidomethylation	42272.2	Galactokinase OS=Homo sapiens OX=9606 GN=GALK1 PE=1 SV=1
900	TRUE	O94973|AP2A2_HUMAN	285.472	15	11	62	64	61	76	72	86	1.03226	1.2459	1.19444	Oxidation (M); Carbamidomethylation	103960	AP-2 complex subunit alpha-2 OS=Homo sapiens OX=9606 GN=AP2A2 PE=1 SV=2
3965	TRUE	Q9BYZ2|LDH6B_HUMAN	119.373	2	1	14	16	11	13	31	37	1.14286	1.18182	1.19355	Oxidation (M); Carbamidomethylation	41942.9	L-lactate dehydrogenase A-like 6B OS=Homo sapiens OX=9606 GN=LDHAL6B PE=1 SV=3
1559	TRUE	Q7Z3B4|NUP54_HUMAN	238.717	11	11	23	21	25	19	31	37	0.913043	0.76	1.19355		55435.5	Nucleoporin p54 OS=Homo sapiens OX=9606 GN=NUP54 PE=1 SV=2
1722	TRUE	Q9BPX5|ARP5L_HUMAN	229.841	8	8	46	48	22	16	31	37	1.04348	0.727273	1.19355	Oxidation (M)	16941.2	Actin-related protein 2/3 complex subunit 5-like protein OS=Homo sapiens OX=9606 GN=ARPC5L PE=1 SV=1
836	TRUE	B0I1T2|MYO1G_HUMAN	291.023	18	16	21	60	11	29	52	62	2.85714	2.63636	1.19231	Oxidation (M); Carbamidomethylation	116442	Unconventional myosin-Ig OS=Homo sapiens OX=9606 GN=MYO1G PE=1 SV=2
2873	TRUE	Q9UK76|JUPI1_HUMAN	171.936	5	5	23	26	26	31	26	31	1.13043	1.19231	1.19231	Oxidation (M)	16014.5	Jupiter microtubule associated homolog 1 OS=Homo sapiens OX=9606 GN=JPT1 PE=1 SV=3
1263	TRUE	Q9UPN7|PP6R1_HUMAN	257.894	15	15	33	28	27	40	47	56	0.848485	1.48148	1.19149	Carbamidomethylation; Oxidation (M)	96723.7	Serine/threonine-protein phosphatase 6 regulatory subunit 1 OS=Homo sapiens OX=9606 GN=PPP6R1 PE=1 SV=5
4112	TRUE	P26373|RL13_HUMAN	113.444	2	2	23	20	13	18	21	25	0.869565	1.38462	1.19048	Oxidation (M)	24261.5	60S ribosomal protein L13 OS=Homo sapiens OX=9606 GN=RPL13 PE=1 SV=4
2672	TRUE	Q969X1|LFG3_HUMAN	181.89	4	4	11	10	4	5	21	25	0.909091	1.25	1.19048	Oxidation (M)	34607.4	Protein lifeguard 3 OS=Homo sapiens OX=9606 GN=TMBIM1 PE=1 SV=2
1317	TRUE	Q96JC1|VPS39_HUMAN	254.817	16	16	31	36	33	39	21	25	1.16129	1.18182	1.19048	Oxidation (M); Carbamidomethylation	101809	Vam6/Vps39-like protein OS=Homo sapiens OX=9606 GN=VPS39 PE=1 SV=2
1998	TRUE	Q15750|TAB1_HUMAN	215.327	11	11	11	14	20	23	21	25	1.27273	1.15	1.19048	Oxidation (M)	54644.1	TGF-beta-activated kinase 1 and MAP3K7-binding protein 1 OS=Homo sapiens OX=9606 GN=TAB1 PE=1 SV=1
1420	TRUE	P49754|VPS41_HUMAN	247.815	14	14	24	27	18	12	42	50	1.125	0.666667	1.19048	Oxidation (M); Carbamidomethylation	98566.1	Vacuolar protein sorting-associated protein 41 homolog OS=Homo sapiens OX=9606 GN=VPS41 PE=1 SV=3
179	TRUE	P08133|ANXA6_HUMAN	386.703	30	30	107	140	139	156	137	163	1.30841	1.1223	1.18978	Oxidation (M)	75873.3	Annexin A6 OS=Homo sapiens OX=9606 GN=ANXA6 PE=1 SV=3
680	TRUE	Q12768|WASC5_HUMAN	307.461	25	25	40	54	56	36	58	69	1.35	0.642857	1.18966	Carbamidomethylation; Oxidation (M)	134286	WASH complex subunit 5 OS=Homo sapiens OX=9606 GN=WASHC5 PE=1 SV=1
663	TRUE	P28066|PSA5_HUMAN	309.263	13	13	124	165	124	135	127	151	1.33065	1.08871	1.18898	Carbamidomethylation; Oxidation (M)	26411	Proteasome subunit alpha type-5 OS=Homo sapiens OX=9606 GN=PSMA5 PE=1 SV=3
2204	TRUE	O00487|PSDE_HUMAN	204.823	7	7	50	41	23	57	53	63	0.82	2.47826	1.18868	Oxidation (M); Carbamidomethylation	34577	26S proteasome non-ATPase regulatory subunit 14 OS=Homo sapiens OX=9606 GN=PSMD14 PE=1 SV=1
1923	TRUE	P11279|LAMP1_HUMAN	219.145	10	10	58	42	34	48	53	63	0.724138	1.41176	1.18868	Oxidation (M)	44882.3	Lysosome-associated membrane glycoprotein 1 OS=Homo sapiens OX=9606 GN=LAMP1 PE=1 SV=3
273	TRUE	Q9H2G2|SLK_HUMAN	364.977	33	32	128	131	108	116	133	158	1.02344	1.07407	1.18797	Carbamidomethylation; Oxidation (M)	142695	STE20-like serine/threonine-protein kinase OS=Homo sapiens OX=9606 GN=SLK PE=1 SV=1
1157	FALSE	Q9BUP0|EFHD1_HUMAN	108.108	2	2	17	12	9	15	16	19	0.705882	1.66667	1.1875	Oxidation (M)	26927.7	EF-hand domain-containing protein D1 OS=Homo sapiens OX=9606 GN=EFHD1 PE=1 SV=1
2859	TRUE	Q8N4Q1|MIA40_HUMAN	172.433	3	3	16	18	12	18	16	19	1.125	1.5	1.1875		15996.4	Mitochondrial intermembrane space import and assembly protein 40 OS=Homo sapiens OX=9606 GN=CHCHD4 PE=1 SV=1
676	TRUE	P06703|S10A6_HUMAN	307.862	13	12	72	63	67	66	128	152	0.875	0.985075	1.1875	Carbamidomethylation; Oxidation (M)	10179.7	Protein S100-A6 OS=Homo sapiens OX=9606 GN=S100A6 PE=1 SV=1
3204	TRUE	P63172|DYLT1_HUMAN	155.139	3	3	20	19	16	15	16	19	0.95	0.9375	1.1875		12452	Dynein light chain Tctex-type 1 OS=Homo sapiens OX=9606 GN=DYNLT1 PE=1 SV=1
2768	TRUE	Q8WVJ2|NUDC2_HUMAN	177.619	5	5	21	19	21	19	16	19	0.904762	0.904762	1.1875	Carbamidomethylation	17675.9	NudC domain-containing protein 2 OS=Homo sapiens OX=9606 GN=NUDCD2 PE=1 SV=1
1134	TRUE	Q14746|COG2_HUMAN	268.186	14	14	35	46	50	41	32	38	1.31429	0.82	1.1875	Oxidation (M); Carbamidomethylation	83207.5	Conserved oligomeric Golgi complex subunit 2 OS=Homo sapiens OX=9606 GN=COG2 PE=1 SV=1
2954	TRUE	Q96HN2|SAHH3_HUMAN	167.118	7	2	17	16	18	9	16	19	0.941176	0.5	1.1875	Carbamidomethylation; Oxidation (M)	66721.1	Adenosylhomocysteinase 3 OS=Homo sapiens OX=9606 GN=AHCYL2 PE=1 SV=1
2440	TRUE	Q9Y5X2|SNX8_HUMAN	193.21	9	9	17	20	22	13	27	32	1.17647	0.590909	1.18519	Carbamidomethylation	52569.4	Sorting nexin-8 OS=Homo sapiens OX=9606 GN=SNX8 PE=1 SV=1
1366	TRUE	Q12846|STX4_HUMAN	251.512	12	12	62	73	47	55	49	58	1.17742	1.17021	1.18367	Oxidation (M)	34179.9	Syntaxin-4 OS=Homo sapiens OX=9606 GN=STX4 PE=1 SV=2
1258	TRUE	Q13557|KCC2D_HUMAN	258.087	13	10	81	65	42	48	49	58	0.802469	1.14286	1.18367	Carbamidomethylation; Oxidation (M)	56369.4	Calcium/calmodulin-dependent protein kinase type II subunit delta OS=Homo sapiens OX=9606 GN=CAMK2D PE=1 SV=3
805	TRUE	P62136|PP1A_HUMAN	293.578	12	2	50	50	53	57	49	58	1	1.07547	1.18367	Carbamidomethylation; Oxidation (M)	37512.1	Serine/threonine-protein phosphatase PP1-alpha catalytic subunit OS=Homo sapiens OX=9606 GN=PPP1CA PE=1 SV=1
353	TRUE	P35241|RADI_HUMAN	349.914	23	16	297	351	174	183	208	246	1.18182	1.05172	1.18269	Carbamidomethylation; Oxidation (M)	68563.9	Radixin OS=Homo sapiens OX=9606 GN=RDX PE=1 SV=1
358	TRUE	Q7Z3T8|ZFY16_HUMAN	349.028	30	30	120	137	91	106	115	136	1.14167	1.16484	1.18261	Carbamidomethylation; Oxidation (M)	168903	Zinc finger FYVE domain-containing protein 16 OS=Homo sapiens OX=9606 GN=ZFYVE16 PE=1 SV=3
3523	TRUE	P23193|TCEA1_HUMAN	139.459	4	4	9	13	6	16	11	13	1.44444	2.66667	1.18182	Oxidation (M); Carbamidomethylation	33969.6	Transcription elongation factor A protein 1 OS=Homo sapiens OX=9606 GN=TCEA1 PE=1 SV=2
2840	TRUE	P16403|H12_HUMAN	173.182	5	1	66	58	9	18	33	39	0.878788	2	1.18182		21364.7	Histone H1.2 OS=Homo sapiens OX=9606 GN=H1-2 PE=1 SV=2
2392	TRUE	Q96EY5|MB12A_HUMAN	195	6	6	20	25	12	18	22	26	1.25	1.5	1.18182	Oxidation (M); Carbamidomethylation	28783	Multivesicular body subunit 12A OS=Homo sapiens OX=9606 GN=MVB12A PE=1 SV=1
1795	TRUE	Q96RQ3|MCCA_HUMAN	225.537	10	10	35	28	11	16	11	13	0.8	1.45455	1.18182	Carbamidomethylation; Oxidation (M)	80473	Methylcrotonoyl-CoA carboxylase subunit alpha, mitochondrial OS=Homo sapiens OX=9606 GN=MCCC1 PE=1 SV=3
1059	TRUE	Q9NTX5|ECHD1_HUMAN	272.985	16	16	81	77	41	53	44	52	0.950617	1.29268	1.18182	Oxidation (M); Carbamidomethylation	33698	Ethylmalonyl-CoA decarboxylase OS=Homo sapiens OX=9606 GN=ECHDC1 PE=1 SV=2
3541	TRUE	Q6P4A7|SFXN4_HUMAN	138.534	3	3	8	11	4	5	11	13	1.375	1.25	1.18182	Carbamidomethylation	37998.3	Sideroflexin-4 OS=Homo sapiens OX=9606 GN=SFXN4 PE=1 SV=1
464	TRUE	P55265|DSRAD_HUMAN	333.325	24	24	78	95	59	65	55	65	1.21795	1.10169	1.18182	Oxidation (M); Carbamidomethylation	136066	Double-stranded RNA-specific adenosine deaminase OS=Homo sapiens OX=9606 GN=ADAR PE=1 SV=4
1178	TRUE	A0AV96|RBM47_HUMAN	264.1	11	11	39	45	39	42	44	52	1.15385	1.07692	1.18182	Oxidation (M); Carbamidomethylation	64099.1	RNA-binding protein 47 OS=Homo sapiens OX=9606 GN=RBM47 PE=1 SV=2
2310	TRUE	O95544|NADK_HUMAN	199.123	7	7	11	13	22	19	22	26	1.18182	0.863636	1.18182	Carbamidomethylation; Oxidation (M)	49228.2	NAD kinase OS=Homo sapiens OX=9606 GN=NADK PE=1 SV=1
402	TRUE	P57737|CORO7_HUMAN	341.398	20	20	71	84	88	70	77	91	1.1831	0.795455	1.18182	Carbamidomethylation; Oxidation (M)	100605	Coronin-7 OS=Homo sapiens OX=9606 GN=CORO7 PE=1 SV=2
2568	TRUE	Q15006|EMC2_HUMAN	186.423	7	7	28	36	40	39	39	46	1.28571	0.975	1.17949	Oxidation (M)	34833.5	ER membrane protein complex subunit 2 OS=Homo sapiens OX=9606 GN=EMC2 PE=1 SV=1
1533	TRUE	P02792|FRIL_HUMAN	240.285	5	5	33	29	19	31	28	33	0.878788	1.63158	1.17857	Carbamidomethylation	20019.7	Ferritin light chain OS=Homo sapiens OX=9606 GN=FTL PE=1 SV=2
1305	TRUE	Q08752|PPID_HUMAN	255.429	11	11	54	58	66	50	56	66	1.07407	0.757576	1.17857	Oxidation (M); Carbamidomethylation	40763.6	Peptidyl-prolyl cis-trans isomerase D OS=Homo sapiens OX=9606 GN=PPID PE=1 SV=3
670	TRUE	Q16181|SEPT7_HUMAN	308.311	17	16	72	65	95	59	56	66	0.902778	0.621053	1.17857	Carbamidomethylation; Oxidation (M)	50679.9	Septin-7 OS=Homo sapiens OX=9606 GN=SEPTIN7 PE=1 SV=2
695	TRUE	Q96PC5|MIA2_HUMAN	305.278	17	17	80	79	47	59	73	86	0.9875	1.25532	1.17808	Carbamidomethylation; Oxidation (M)	159836	Melanoma inhibitory activity protein 2 OS=Homo sapiens OX=9606 GN=MIA2 PE=1 SV=4
3882	TRUE	Q9Y3X0|CCDC9_HUMAN	122.707	2	2	24	20	5	10	17	20	0.833333	2	1.17647		59703	Coiled-coil domain-containing protein 9 OS=Homo sapiens OX=9606 GN=CCDC9 PE=1 SV=1
2688	TRUE	Q9NQ25|SLAF7_HUMAN	181.294	6	6	22	27	16	23	17	20	1.22727	1.4375	1.17647	Carbamidomethylation	37420.9	SLAM family member 7 OS=Homo sapiens OX=9606 GN=SLAMF7 PE=1 SV=1
1882	TRUE	P51692|STA5B_HUMAN	220.686	13	2	22	25	19	26	34	40	1.13636	1.36842	1.17647	Carbamidomethylation	89865.9	Signal transducer and activator of transcription 5B OS=Homo sapiens OX=9606 GN=STAT5B PE=1 SV=2
1682	TRUE	Q9Y2B0|CNPY2_HUMAN	232.207	8	8	54	40	34	38	34	40	0.740741	1.11765	1.17647	Oxidation (M)	20652.2	Protein canopy homolog 2 OS=Homo sapiens OX=9606 GN=CNPY2 PE=1 SV=1
3729	TRUE	O75251|NDUS7_HUMAN	130.207	2	2	33	33	14	15	17	20	1	1.07143	1.17647	Oxidation (M)	23563.5	NADH dehydrogenase [ubiquinone] iron-sulfur protein 7, mitochondrial OS=Homo sapiens OX=9606 GN=NDUFS7 PE=1 SV=3
2488	TRUE	Q13426|XRCC4_HUMAN	190.852	6	6	17	19	10	9	17	20	1.11765	0.9	1.17647	Oxidation (M)	38286.7	DNA repair protein XRCC4 OS=Homo sapiens OX=9606 GN=XRCC4 PE=1 SV=2
2608	TRUE	Q9NSD9|SYFB_HUMAN	184.708	8	8	23	36	16	12	17	20	1.56522	0.75	1.17647	Carbamidomethylation; Oxidation (M)	66115.6	Phenylalanine--tRNA ligase beta subunit OS=Homo sapiens OX=9606 GN=FARSB PE=1 SV=3
558	TRUE	Q93009|UBP7_HUMAN	321.08	24	24	88	86	75	59	74	87	0.977273	0.786667	1.17568	Oxidation (M); Carbamidomethylation	128302	Ubiquitin carboxyl-terminal hydrolase 7 OS=Homo sapiens OX=9606 GN=USP7 PE=1 SV=2
1499	TRUE	O00148|DX39A_HUMAN	243.004	11	7	55	75	23	34	57	67	1.36364	1.47826	1.17544	Oxidation (M); Carbamidomethylation	49129.5	ATP-dependent RNA helicase DDX39A OS=Homo sapiens OX=9606 GN=DDX39A PE=1 SV=2
754	TRUE	Q96C23|GALM_HUMAN	299.53	15	15	143	137	100	107	126	148	0.958042	1.07	1.1746	Carbamidomethylation	37765.5	Galactose mutarotase OS=Homo sapiens OX=9606 GN=GALM PE=1 SV=1
2007	TRUE	Q7Z406|MYH14_HUMAN	214.81	7	1	80	106	60	59	63	74	1.325	0.983333	1.1746	Carbamidomethylation; Oxidation (M)	227871	Myosin-14 OS=Homo sapiens OX=9606 GN=MYH14 PE=1 SV=2
235	TRUE	P11717|MPRI_HUMAN	372.608	34	34	80	102	60	158	138	162	1.275	2.63333	1.17391	Oxidation (M); Carbamidomethylation	274375	Cation-independent mannose-6-phosphate receptor OS=Homo sapiens OX=9606 GN=IGF2R PE=1 SV=3
3376	TRUE	Q86VN1|VPS36_HUMAN	146.437	4	4	12	15	14	6	23	27	1.25	0.428571	1.17391	Oxidation (M)	43816.7	Vacuolar protein-sorting-associated protein 36 OS=Homo sapiens OX=9606 GN=VPS36 PE=1 SV=1
296	TRUE	A0MZ66|SHOT1_HUMAN	358.84	29	29	158	150	140	118	127	149	0.949367	0.842857	1.17323	Carbamidomethylation; Oxidation (M)	71639.9	Shootin-1 OS=Homo sapiens OX=9606 GN=SHTN1 PE=1 SV=4
1291	TRUE	P33897|ABCD1_HUMAN	256.061	11	11	28	38	19	21	29	34	1.35714	1.10526	1.17241	Carbamidomethylation	82936.9	ATP-binding cassette sub-family D member 1 OS=Homo sapiens OX=9606 GN=ABCD1 PE=1 SV=2
2858	TRUE	Q14457|BECN1_HUMAN	172.52	8	8	13	21	20	22	29	34	1.61538	1.1	1.17241		51896.3	Beclin-1 OS=Homo sapiens OX=9606 GN=BECN1 PE=1 SV=2
1042	FALSE	Q9UPY6|WASF3_HUMAN	88.968	1	1	24	22	22	22	29	34	0.916667	1	1.17241		55292.9	Wiskott-Aldrich syndrome protein family member 3 OS=Homo sapiens OX=9606 GN=WASF3 PE=1 SV=2
2026	TRUE	Q07812|BAX_HUMAN	213.97	7	7	60	66	39	42	35	41	1.1	1.07692	1.17143	Oxidation (M)	21184.4	Apoptosis regulator BAX OS=Homo sapiens OX=9606 GN=BAX PE=1 SV=1
639	TRUE	Q96T51|RUFY1_HUMAN	311.805	23	23	82	75	72	73	70	82	0.914634	1.01389	1.17143	Carbamidomethylation; Oxidation (M)	79817.9	RUN and FYVE domain-containing protein 1 OS=Homo sapiens OX=9606 GN=RUFY1 PE=1 SV=2
1237	TRUE	Q9H270|VPS11_HUMAN	259.754	17	17	32	45	28	22	35	41	1.40625	0.785714	1.17143	Oxidation (M); Carbamidomethylation	107837	Vacuolar protein sorting-associated protein 11 homolog OS=Homo sapiens OX=9606 GN=VPS11 PE=1 SV=1
1824	TRUE	Q8NEZ2|VP37A_HUMAN	224.109	8	8	14	23	20	27	41	48	1.64286	1.35	1.17073	Carbamidomethylation	44314.4	Vacuolar protein sorting-associated protein 37A OS=Homo sapiens OX=9606 GN=VPS37A PE=1 SV=1
811	TRUE	Q9UNZ2|NSF1C_HUMAN	293.279	14	14	71	88	67	46	65	76	1.23944	0.686567	1.16923		40572.8	NSFL1 cofactor p47 OS=Homo sapiens OX=9606 GN=NSFL1C PE=1 SV=2
1116	TRUE	P54727|RD23B_HUMAN	269.026	7	7	105	98	62	65	95	111	0.933333	1.04839	1.16842	Carbamidomethylation	43171.2	UV excision repair protein RAD23 homolog B OS=Homo sapiens OX=9606 GN=RAD23B PE=1 SV=1
3679	TRUE	Q9Y5B6|PAXB1_HUMAN	132.078	4	4	7	7		3	6	7	1	3	1.16667	Carbamidomethylation	104804	PAX3- and PAX7-binding protein 1 OS=Homo sapiens OX=9606 GN=PAXBP1 PE=1 SV=2
1884	FALSE	Q9BSU3|NAA11_HUMAN	77.0034	1	1	5	2	1	3	6	7	0.4	3	1.16667	Oxidation (M)	25978.8	N-alpha-acetyltransferase 11 OS=Homo sapiens OX=9606 GN=NAA11 PE=1 SV=3
4084	TRUE	P53355|DAPK1_HUMAN	114.584	3	3	10	7		2	6	7	0.7	2	1.16667		160046	Death-associated protein kinase 1 OS=Homo sapiens OX=9606 GN=DAPK1 PE=1 SV=6
3269	TRUE	P48047|ATPO_HUMAN	151.149	5	5	27	33	17	28	30	35	1.22222	1.64706	1.16667	Carbamidomethylation; Oxidation (M)	23277.3	ATP synthase subunit O, mitochondrial OS=Homo sapiens OX=9606 GN=ATP5PO PE=1 SV=1
2783	TRUE	P10412|H14_HUMAN	176.427	5	1	68	68	15	22	42	49	1	1.46667	1.16667		21865.3	Histone H1.4 OS=Homo sapiens OX=9606 GN=H1-4 PE=1 SV=2
3223	TRUE	Q5U5X0|LYRM7_HUMAN	154.161	3	3	21	20	11	16	18	21	0.952381	1.45455	1.16667	Carbamidomethylation	11954.9	Complex III assembly factor LYRM7 OS=Homo sapiens OX=9606 GN=LYRM7 PE=1 SV=1
1500	FALSE	P16083|NQO2_HUMAN	235.598	10	10	37	31	33	48	18	21	0.837838	1.45455	1.16667	Oxidation (M); Carbamidomethylation	25918.6	Ribosyldihydronicotinamide dehydrogenase [quinone] OS=Homo sapiens OX=9606 GN=NQO2 PE=1 SV=5
4061	TRUE	P16455|MGMT_HUMAN	115.464	2	2	5	6	4	5	6	7	1.2	1.25	1.16667	Carbamidomethylation	21646	Methylated-DNA--protein-cysteine methyltransferase OS=Homo sapiens OX=9606 GN=MGMT PE=1 SV=1
4413	TRUE	Q9NWY4|HPF1_HUMAN	98.5656	2	2	3	3	8	10	6	7	1	1.25	1.16667		39436.1	Histone PARylation factor 1 OS=Homo sapiens OX=9606 GN=HPF1 PE=1 SV=2
4715	TRUE	O60783|RT14_HUMAN	83.9144	1	1	3	2	4	5	6	7	0.666667	1.25	1.16667		15138.7	28S ribosomal protein S14, mitochondrial OS=Homo sapiens OX=9606 GN=MRPS14 PE=1 SV=1
949	TRUE	P42679|MATK_HUMAN	281.696	11	10	63	73	57	66	78	91	1.15873	1.15789	1.16667	Carbamidomethylation; Oxidation (M)	56468.9	Megakaryocyte-associated tyrosine-protein kinase OS=Homo sapiens OX=9606 GN=MATK PE=1 SV=1
3907	TRUE	P52435|RPB11_HUMAN	121.872	3	3	2		7	8	6	7	0.5	1.14286	1.16667	Carbamidomethylation	13293.3	DNA-directed RNA polymerase II subunit RPB11-a OS=Homo sapiens OX=9606 GN=POLR2J PE=1 SV=1
3419	TRUE	O95825|QORL1_HUMAN	144.402	3	3		3	11	12	12	14	3	1.09091	1.16667		38696.5	Quinone oxidoreductase-like protein 1 OS=Homo sapiens OX=9606 GN=CRYZL1 PE=1 SV=2
2192	TRUE	Q9NNW7|TRXR2_HUMAN	205.361	9	8	14	16	18	19	18	21	1.14286	1.05556	1.16667	Carbamidomethylation; Oxidation (M)	56475.4	Thioredoxin reductase 2, mitochondrial OS=Homo sapiens OX=9606 GN=TXNRD2 PE=1 SV=3
1847	TRUE	P53597|SUCA_HUMAN	223.268	6	6	33	32	33	34	24	28	0.969697	1.0303	1.16667	Oxidation (M); Carbamidomethylation	36249.7	Succinate--CoA ligase [ADP/GDP-forming] subunit alpha, mitochondrial OS=Homo sapiens OX=9606 GN=SUCLG1 PE=1 SV=4
3468	TRUE	Q9Y3C6|PPIL1_HUMAN	141.715	3	3	9	17	5	5	18	21	1.88889	1	1.16667	Oxidation (M)	18236.8	Peptidyl-prolyl cis-trans isomerase-like 1 OS=Homo sapiens OX=9606 GN=PPIL1 PE=1 SV=1
1598	TRUE	Q92766|RREB1_HUMAN	236.694	9	9	33	31	5	5	24	28	0.939394	1	1.16667		181420	Ras-responsive element-binding protein 1 OS=Homo sapiens OX=9606 GN=RREB1 PE=1 SV=3
2288	TRUE	O94788|AL1A2_HUMAN	200.212	9	9	31	32	19	18	24	28	1.03226	0.947368	1.16667	Oxidation (M); Carbamidomethylation	56723.9	Retinal dehydrogenase 2 OS=Homo sapiens OX=9606 GN=ALDH1A2 PE=1 SV=3
2900	TRUE	Q6QNY1|BL1S2_HUMAN	170.313	4	4	31	27	16	15	18	21	0.870968	0.9375	1.16667	Carbamidomethylation; Oxidation (M)	15961.1	Biogenesis of lysosome-related organelles complex 1 subunit 2 OS=Homo sapiens OX=9606 GN=BLOC1S2 PE=1 SV=1
3447	TRUE	P49441|INPP_HUMAN	142.659	3	3	12	12	10	9	12	14	1	0.9	1.16667	Carbamidomethylation	43998	Inositol polyphosphate 1-phosphatase OS=Homo sapiens OX=9606 GN=INPP1 PE=1 SV=1
1802	TRUE	O60216|RAD21_HUMAN	225.15	8	8	12	29	18	16	18	21	2.41667	0.888889	1.16667	Carbamidomethylation; Oxidation (M)	71689.5	Double-strand-break repair protein rad21 homolog OS=Homo sapiens OX=9606 GN=RAD21 PE=1 SV=2
2915	TRUE	Q9BYD2|RM09_HUMAN	169.151	5	5	10	17	8	7	6	7	1.7	0.875	1.16667		30243.3	39S ribosomal protein L9, mitochondrial OS=Homo sapiens OX=9606 GN=MRPL9 PE=1 SV=2
2957	TRUE	Q9BWF3|RBM4_HUMAN	167.03	5	5	10	8	14	12	18	21	0.8	0.857143	1.16667	Carbamidomethylation	40313.8	RNA-binding protein 4 OS=Homo sapiens OX=9606 GN=RBM4 PE=1 SV=1
1938	TRUE	Q5TFQ8|SIRBL_HUMAN	218.472	6	1	21	21	33	28	18	21	1	0.848485	1.16667	Carbamidomethylation	43359.3	Signal-regulatory protein beta-1 isoform 3 OS=Homo sapiens OX=9606 GN=SIRPB1 PE=1 SV=1
2327	TRUE	Q9NP79|VTA1_HUMAN	198.36	7	7	13	22	20	16	30	35	1.69231	0.8	1.16667	Carbamidomethylation; Oxidation (M)	33879.2	Vacuolar protein sorting-associated protein VTA1 homolog OS=Homo sapiens OX=9606 GN=VTA1 PE=1 SV=1
1870	TRUE	Q15020|SART3_HUMAN	221.725	8	8	29	34	26	20	24	28	1.17241	0.769231	1.16667	Oxidation (M)	109935	Squamous cell carcinoma antigen recognized by T-cells 3 OS=Homo sapiens OX=9606 GN=SART3 PE=1 SV=1
3451	TRUE	Q9H5N1|RABE2_HUMAN	142.472	5	5	1		4	3	6	7	1	0.75	1.16667	Carbamidomethylation	63542.8	Rab GTPase-binding effector protein 2 OS=Homo sapiens OX=9606 GN=RABEP2 PE=1 SV=2
2182	TRUE	Q9Y5Z4|HEBP2_HUMAN	205.768	5	5	41	60	19	14	36	42	1.46341	0.736842	1.16667	Oxidation (M)	22875.4	Heme-binding protein 2 OS=Homo sapiens OX=9606 GN=HEBP2 PE=1 SV=1
4503	TRUE	P05976|MYL1_HUMAN	93.7174	2	1	72	70	79	55	72	84	0.972222	0.696203	1.16667	Oxidation (M)	21145.1	Myosin light chain 1/3, skeletal muscle isoform OS=Homo sapiens OX=9606 GN=MYL1 PE=1 SV=3
1534	TRUE	Q99590|SCAFB_HUMAN	240.269	11	11	33	23	16	11	24	28	0.69697	0.6875	1.16667	Carbamidomethylation	164652	Protein SCAF11 OS=Homo sapiens OX=9606 GN=SCAF11 PE=1 SV=2
1604	TRUE	P17480|UBF1_HUMAN	236.313	10	10	26	35	37	24	30	35	1.34615	0.648649	1.16667		89405.9	Nucleolar transcription factor 1 OS=Homo sapiens OX=9606 GN=UBTF PE=1 SV=1
3116	TRUE	P34059|GALNS_HUMAN	159.402	4	4	17	21	8	3	6	7	1.23529	0.375	1.16667		58026	N-acetylgalactosamine-6-sulfatase OS=Homo sapiens OX=9606 GN=GALNS PE=1 SV=1
3476	TRUE	Q13427|PPIG_HUMAN	141.603	7	7	3	9	4	1	6	7	3	0.25	1.16667	Carbamidomethylation	88617.2	Peptidyl-prolyl cis-trans isomerase G OS=Homo sapiens OX=9606 GN=PPIG PE=1 SV=2
4717	TRUE	Q9GZP9|DERL2_HUMAN	83.8796	1	1	5		6		6	7	0.2	0.166667	1.16667		27567.4	Derlin-2 OS=Homo sapiens OX=9606 GN=DERL2 PE=1 SV=1
3621	TRUE	Q9BX69|CARD6_HUMAN	135.086	4	4	6				6	7	0.166667		1.16667		116468	Caspase recruitment domain-containing protein 6 OS=Homo sapiens OX=9606 GN=CARD6 PE=1 SV=2
4746	TRUE	L0R819|ASURF_HUMAN	82.673	2	2	7				6	7	0.142857		1.16667		11249.8	ASNSD1 upstream open reading frame protein OS=Homo sapiens OX=9606 GN=ASDURF PE=1 SV=1
618	TRUE	P42167|LAP2B_HUMAN	314.378	17	7	101	102	94	82	91	106	1.0099	0.87234	1.16484	Oxidation (M); Carbamidomethylation	50670.3	Lamina-associated polypeptide 2, isoforms beta/gamma OS=Homo sapiens OX=9606 GN=TMPO PE=1 SV=2
802	TRUE	O00567|NOP56_HUMAN	294.123	17	17	68	67	27	63	61	71	0.985294	2.33333	1.16393	Oxidation (M); Carbamidomethylation	66049.9	Nucleolar protein 56 OS=Homo sapiens OX=9606 GN=NOP56 PE=1 SV=4
1270	TRUE	P53992|SC24C_HUMAN	257.263	13	13	44	43	54	37	55	64	0.977273	0.685185	1.16364	Carbamidomethylation; Oxidation (M)	118325	Protein transport protein Sec24C OS=Homo sapiens OX=9606 GN=SEC24C PE=1 SV=3
421	TRUE	Q4V328|GRAP1_HUMAN	337.934	28	28	86	84	80	104	104	121	0.976744	1.3	1.16346	Oxidation (M); Carbamidomethylation	96005.6	GRIP1-associated protein 1 OS=Homo sapiens OX=9606 GN=GRIPAP1 PE=1 SV=2
394	TRUE	Q6IBS0|TWF2_HUMAN	342.783	17	17	127	119	129	156	141	164	0.937008	1.2093	1.16312	Carbamidomethylation; Oxidation (M)	39548	Twinfilin-2 OS=Homo sapiens OX=9606 GN=TWF2 PE=1 SV=2
992	TRUE	Q9Y2Z0|SGT1_HUMAN	277.963	15	15	71	60	54	57	43	50	0.84507	1.05556	1.16279	Carbamidomethylation; Oxidation (M)	41024.1	Protein SGT1 homolog OS=Homo sapiens OX=9606 GN=SUGT1 PE=1 SV=3
926	TRUE	Q30154|DRB5_HUMAN	283.521	11	2	25	46	33	55	68	79	1.84	1.66667	1.16176	Oxidation (M); Carbamidomethylation	30056	HLA class II histocompatibility antigen, DR beta 5 chain OS=Homo sapiens OX=9606 GN=HLA-DRB5 PE=1 SV=1
2196	TRUE	P61018|RAB4B_HUMAN	205.257	8	6	27	27	13	36	31	36	1	2.76923	1.16129	Oxidation (M); Carbamidomethylation	23586.7	Ras-related protein Rab-4B OS=Homo sapiens OX=9606 GN=RAB4B PE=1 SV=1
695	FALSE	Q96RT6|CTGE2_HUMAN	210.919	7	7	30	31	16	29	31	36	1.03333	1.8125	1.16129	Carbamidomethylation; Oxidation (M)	85281.5	cTAGE family member 2 OS=Homo sapiens OX=9606 GN=CTAGE1 PE=1 SV=2
2119	TRUE	Q9GZZ9|UBA5_HUMAN	208.77	7	7	26	22	24	31	31	36	0.846154	1.29167	1.16129	Carbamidomethylation; Oxidation (M)	44863.1	Ubiquitin-like modifier-activating enzyme 5 OS=Homo sapiens OX=9606 GN=UBA5 PE=1 SV=1
1454	TRUE	O60502|OGA_HUMAN	246.02	11	11	46	41	45	53	31	36	0.891304	1.17778	1.16129	Oxidation (M)	102915	Protein O-GlcNAcase OS=Homo sapiens OX=9606 GN=OGA PE=1 SV=2
2035	TRUE	P49961|ENTP1_HUMAN	213.115	9	9	30	34	28	30	31	36	1.13333	1.07143	1.16129	Carbamidomethylation; Oxidation (M)	57964.5	Ectonucleoside triphosphate diphosphohydrolase 1 OS=Homo sapiens OX=9606 GN=ENTPD1 PE=1 SV=1
904	TRUE	Q6ZNJ1|NBEL2_HUMAN	285.187	17	17	76	74	58	50	62	72	0.973684	0.862069	1.16129	Carbamidomethylation; Oxidation (M)	302517	Neurobeachin-like protein 2 OS=Homo sapiens OX=9606 GN=NBEAL2 PE=1 SV=2
1207	TRUE	Q9UGP4|LIMD1_HUMAN	262.162	12	12	29	40	39	31	31	36	1.37931	0.794872	1.16129	Oxidation (M); Carbamidomethylation	72190.2	LIM domain-containing protein 1 OS=Homo sapiens OX=9606 GN=LIMD1 PE=1 SV=1
1303	TRUE	Q9BXP5|SRRT_HUMAN	255.497	12	12	63	74	53	69	56	65	1.1746	1.30189	1.16071	Oxidation (M)	100666	Serrate RNA effector molecule homolog OS=Homo sapiens OX=9606 GN=SRRT PE=1 SV=1
3795	TRUE	Q9UKX3|MYH13_HUMAN	126.983	3	2	35	30	19	22	25	29	0.857143	1.15789	1.16	Oxidation (M)	223605	Myosin-13 OS=Homo sapiens OX=9606 GN=MYH13 PE=2 SV=2
914	TRUE	P09429|HMGB1_HUMAN	284.732	11	9	70	90	106	95	94	109	1.28571	0.896226	1.15957	Oxidation (M); Carbamidomethylation	24893.8	High mobility group protein B1 OS=Homo sapiens OX=9606 GN=HMGB1 PE=1 SV=3
503	TRUE	P14550|AK1A1_HUMAN	328.937	17	16	207	200	174	164	138	160	0.966184	0.942529	1.15942	Carbamidomethylation; Oxidation (M)	36573	Aldo-keto reductase family 1 member A1 OS=Homo sapiens OX=9606 GN=AKR1A1 PE=1 SV=3
1082	TRUE	Q13838|DX39B_HUMAN	271.6	12	8	70	118	45	55	88	102	1.68571	1.22222	1.15909	Oxidation (M); Carbamidomethylation	48991.3	Spliceosome RNA helicase DDX39B OS=Homo sapiens OX=9606 GN=DDX39B PE=1 SV=1
2515	TRUE	Q9HB19|PKHA2_HUMAN	189.326	6	6	18	14	7	19	19	22	0.777778	2.71429	1.15789	Oxidation (M)	47255	Pleckstrin homology domain-containing family A member 2 OS=Homo sapiens OX=9606 GN=PLEKHA2 PE=1 SV=2
3080	TRUE	Q9UBW8|CSN7A_HUMAN	161.161	5	5	10	7	11	14	19	22	0.7	1.27273	1.15789		30276.6	COP9 signalosome complex subunit 7a OS=Homo sapiens OX=9606 GN=COPS7A PE=1 SV=1
709	TRUE	P16070|CD44_HUMAN	303.5	14	14	142	167	87	95	133	154	1.17606	1.09195	1.15789	Carbamidomethylation; Oxidation (M)	81537.6	CD44 antigen OS=Homo sapiens OX=9606 GN=CD44 PE=1 SV=3
3561	TRUE	P49770|EI2BB_HUMAN	137.864	4	4	16	14	18	16	19	22	0.875	0.888889	1.15789		38989.6	Translation initiation factor eIF-2B subunit beta OS=Homo sapiens OX=9606 GN=EIF2B2 PE=1 SV=3
2133	FALSE	P52564|MP2K6_HUMAN	115.698	2	2	5	7	17	6	89	103	1.4	0.352941	1.1573	Oxidation (M); Carbamidomethylation	37492.3	Dual specificity mitogen-activated protein kinase kinase 6 OS=Homo sapiens OX=9606 GN=MAP2K6 PE=1 SV=1
1355	TRUE	Q9H9B4|SFXN1_HUMAN	252.308	14	11	48	51	17	23	32	37	1.0625	1.35294	1.15625		35619.4	Sideroflexin-1 OS=Homo sapiens OX=9606 GN=SFXN1 PE=1 SV=4
3000	TRUE	P16401|H15_HUMAN	165.337	5	5	57	52	19	14	64	74	0.912281	0.736842	1.15625		22580.2	Histone H1.5 OS=Homo sapiens OX=9606 GN=H1-5 PE=1 SV=3
582	TRUE	O60749|SNX2_HUMAN	318.231	24	22	107	114	114	87	109	126	1.06542	0.763158	1.15596	Oxidation (M)	58471.1	Sorting nexin-2 OS=Homo sapiens OX=9606 GN=SNX2 PE=1 SV=2
1841	TRUE	P61020|RAB5B_HUMAN	223.466	7	4	47	44	38	36	45	52	0.93617	0.947368	1.15556	Oxidation (M)	23706.8	Ras-related protein Rab-5B OS=Homo sapiens OX=9606 GN=RAB5B PE=1 SV=1
147	TRUE	P49588|SYAC_HUMAN	397.966	39	39	277	251	153	179	193	223	0.906137	1.16993	1.15544	Oxidation (M); Carbamidomethylation	106810	Alanine--tRNA ligase, cytoplasmic OS=Homo sapiens OX=9606 GN=AARS1 PE=1 SV=2
3865	TRUE	P41214|EIF2D_HUMAN	123.749	3	3	3	10	2	4	13	15	3.33333	2	1.15385		64706.5	Eukaryotic translation initiation factor 2D OS=Homo sapiens OX=9606 GN=EIF2D PE=1 SV=3
3044	TRUE	P35908|K22E_HUMAN	162.852	6	4	8	5	5	10	13	15	0.625	2	1.15385		65432.9	Keratin, type II cytoskeletal 2 epidermal OS=Homo sapiens OX=9606 GN=KRT2 PE=1 SV=2
1730	TRUE	Q96L92|SNX27_HUMAN	229.326	8	8	30	26	16	18	26	30	0.866667	1.125	1.15385		61265.2	Sorting nexin-27 OS=Homo sapiens OX=9606 GN=SNX27 PE=1 SV=2
2974	TRUE	P36639|8ODP_HUMAN	166.559	5	5	11	5	10	9	13	15	0.454545	0.9	1.15385		22519.6	7,8-dihydro-8-oxoguanine triphosphatase OS=Homo sapiens OX=9606 GN=NUDT1 PE=1 SV=3
234	FALSE	P0DN37|PAL4G_HUMAN	156.494	4	4	15	28	16	10	13	15	1.86667	0.625	1.15385	Carbamidomethylation	18165.7	Peptidyl-prolyl cis-trans isomerase A-like 4G OS=Homo sapiens OX=9606 GN=PPIAL4G PE=3 SV=1
3803	TRUE	Q99759|M3K3_HUMAN	126.696	5	3	11	9	7	4	13	15	0.818182	0.571429	1.15385	Carbamidomethylation	70897.7	Mitogen-activated protein kinase kinase kinase 3 OS=Homo sapiens OX=9606 GN=MAP3K3 PE=1 SV=2
2714	TRUE	P26232|CTNA2_HUMAN	180.204	5	1	8	4	9	4	13	15	0.5	0.444444	1.15385		105313	Catenin alpha-2 OS=Homo sapiens OX=9606 GN=CTNNA2 PE=1 SV=5
3267	TRUE	Q05315|LEG10_HUMAN	151.384	3	3					117	135			1.15385	Oxidation (M)	16452.9	Galectin-10 OS=Homo sapiens OX=9606 GN=CLC PE=1 SV=3
1353	TRUE	Q07955|SRSF1_HUMAN	252.417	13	13	47	76	59	61	85	98	1.61702	1.0339	1.15294	Carbamidomethylation	27744.6	Serine/arginine-rich splicing factor 1 OS=Homo sapiens OX=9606 GN=SRSF1 PE=1 SV=2
981	TRUE	P50453|SPB9_HUMAN	278.782	18	17	56	78	53	51	59	68	1.39286	0.962264	1.15254	Carbamidomethylation; Oxidation (M)	42403.6	Serpin B9 OS=Homo sapiens OX=9606 GN=SERPINB9 PE=1 SV=1
133	TRUE	P29350|PTN6_HUMAN	404.27	35	35	416	357	345	387	316	364	0.858173	1.12174	1.1519	Carbamidomethylation; Oxidation (M)	67561.1	Tyrosine-protein phosphatase non-receptor type 6 OS=Homo sapiens OX=9606 GN=PTPN6 PE=1 SV=1
1356	TRUE	P67775|PP2AA_HUMAN	252.178	10	1	24	29	26	31	33	38	1.20833	1.19231	1.15152	Oxidation (M); Carbamidomethylation	35594.2	Serine/threonine-protein phosphatase 2A catalytic subunit alpha isoform OS=Homo sapiens OX=9606 GN=PPP2CA PE=1 SV=1
373	TRUE	Q15365|PCBP1_HUMAN	346.568	18	15	179	186	192	197	219	252	1.03911	1.02604	1.15068	Carbamidomethylation; Oxidation (M)	37497.8	Poly(rC)-binding protein 1 OS=Homo sapiens OX=9606 GN=PCBP1 PE=1 SV=2
2730	TRUE	Q9NUN5|LMBD1_HUMAN	179.548	3	3	16	16	25	25	20	23	1	1	1.15	Oxidation (M)	61388.7	Lysosomal cobalamin transport escort protein LMBD1 OS=Homo sapiens OX=9606 GN=LMBRD1 PE=1 SV=1
873	TRUE	P17174|AATC_HUMAN	288.289	14	14	62	62	56	47	47	54	1	0.839286	1.14894	Carbamidomethylation	46247.5	Aspartate aminotransferase, cytoplasmic OS=Homo sapiens OX=9606 GN=GOT1 PE=1 SV=3
189	TRUE	Q9Y4E1|WAC2C_HUMAN	383.901	39	11	139	135	140	128	121	139	0.971223	0.914286	1.14876	Oxidation (M)	144911	WASH complex subunit 2C OS=Homo sapiens OX=9606 GN=WASHC2C PE=1 SV=4
1028	TRUE	P50225|ST1A1_HUMAN	275.621	11	7	29	37	103	125	54	62	1.27586	1.21359	1.14815	Oxidation (M); Carbamidomethylation	34165.3	Sulfotransferase 1A1 OS=Homo sapiens OX=9606 GN=SULT1A1 PE=1 SV=3
1389	TRUE	P30044|PRDX5_HUMAN	250.278	8	8	121	146	118	126	108	124	1.20661	1.0678	1.14815	Carbamidomethylation	22086.4	Peroxiredoxin-5, mitochondrial OS=Homo sapiens OX=9606 GN=PRDX5 PE=1 SV=4
2274	TRUE	P48059|LIMS1_HUMAN	200.944	6	6	24	18	12	12	27	31	0.75	1	1.14815	Carbamidomethylation	37251.3	LIM and senescent cell antigen-like-containing domain protein 1 OS=Homo sapiens OX=9606 GN=LIMS1 PE=1 SV=4
767	TRUE	Q9H4M9|EHD1_HUMAN	298.757	21	15	96	91	113	110	108	124	0.947917	0.973451	1.14815	Oxidation (M); Carbamidomethylation	60626.9	EH domain-containing protein 1 OS=Homo sapiens OX=9606 GN=EHD1 PE=1 SV=2
2463	TRUE	Q8NCW5|NNRE_HUMAN	191.948	6	6	34	38	28	27	27	31	1.11765	0.964286	1.14815	Carbamidomethylation	31674.6	NAD(P)H-hydrate epimerase OS=Homo sapiens OX=9606 GN=NAXE PE=1 SV=2
2054	TRUE	P49750|YLPM1_HUMAN	212.455	14	14	26	13	23	14	27	31	0.5	0.608696	1.14815	Carbamidomethylation; Oxidation (M)	241645	YLP motif-containing protein 1 OS=Homo sapiens OX=9606 GN=YLPM1 PE=1 SV=4
134	TRUE	Q641Q2|WAC2A_HUMAN	402.765	43	15	154	148	147	140	136	156	0.961039	0.952381	1.14706	Oxidation (M); Carbamidomethylation	147184	WASH complex subunit 2A OS=Homo sapiens OX=9606 GN=WASHC2A PE=1 SV=3
589	TRUE	Q92973|TNPO1_HUMAN	316.967	19	17	87	90	73	80	109	125	1.03448	1.09589	1.14679	Carbamidomethylation; Oxidation (M)	102355	Transportin-1 OS=Homo sapiens OX=9606 GN=TNPO1 PE=1 SV=2
1636	TRUE	P22681|CBL_HUMAN	234.476	12	11	28	19	32	19	41	47	0.678571	0.59375	1.14634	Oxidation (M); Carbamidomethylation	99632.8	E3 ubiquitin-protein ligase CBL OS=Homo sapiens OX=9606 GN=CBL PE=1 SV=2
617	TRUE	Q04917|1433F_HUMAN	314.385	17	14	354	326	167	142	220	252	0.920904	0.850299	1.14545	Oxidation (M); Carbamidomethylation	28218.7	14-3-3 protein eta OS=Homo sapiens OX=9606 GN=YWHAH PE=1 SV=4
69	TRUE	Q6S8J3|POTEE_HUMAN	442.79	55	1	2395	2456	4967	5419	5671	6484	1.02547	1.091	1.14336	Carbamidomethylation; Oxidation (M)	121363	POTE ankyrin domain family member E OS=Homo sapiens OX=9606 GN=POTEE PE=2 SV=3
3990	TRUE	Q9BWH6|RPAP1_HUMAN	118.224	3	3	12	5		4	7	8	0.416667	4	1.14286	Carbamidomethylation	152755	RNA polymerase II-associated protein 1 OS=Homo sapiens OX=9606 GN=RPAP1 PE=1 SV=3
3794	TRUE	Q7L266|ASGL1_HUMAN	127.099	4	4	5	6	2	5	7	8	1.2	2.5	1.14286	Carbamidomethylation; Oxidation (M)	32054.5	Isoaspartyl peptidase/L-asparaginase OS=Homo sapiens OX=9606 GN=ASRGL1 PE=1 SV=2
3607	TRUE	Q9BYN0|SRXN1_HUMAN	135.816	4	4	11	7	6	13	14	16	0.636364	2.16667	1.14286	Carbamidomethylation	14259.1	Sulfiredoxin-1 OS=Homo sapiens OX=9606 GN=SRXN1 PE=1 SV=2
2239	TRUE	O75935|DCTN3_HUMAN	202.838	7	7	39	12	8	15	21	24	0.307692	1.875	1.14286	Carbamidomethylation; Oxidation (M)	21119.4	Dynactin subunit 3 OS=Homo sapiens OX=9606 GN=DCTN3 PE=1 SV=1
2227	FALSE	A8MWX3|WASH4_HUMAN	178.803	3	1	6	7	10	16	14	16	1.16667	1.6	1.14286	Oxidation (M)	51595.5	Putative WAS protein family homolog 4 OS=Homo sapiens OX=9606 GN=WASH4P PE=5 SV=1
1029	TRUE	Q96AE4|FUBP1_HUMAN	275.551	12	12	58	66	60	81	91	104	1.13793	1.35	1.14286	Carbamidomethylation; Oxidation (M)	67560.4	Far upstream element-binding protein 1 OS=Homo sapiens OX=9606 GN=FUBP1 PE=1 SV=3
2265	TRUE	Q5T0F9|C2D1B_HUMAN	201.549	9	9	19	20	10	13	14	16	1.05263	1.3	1.14286	Oxidation (M)	94224.4	Coiled-coil and C2 domain-containing protein 1B OS=Homo sapiens OX=9606 GN=CC2D1B PE=1 SV=1
4735	TRUE	Q9NRP0|OSTC_HUMAN	83.4638	1	1	5	4	5	6	7	8	0.8	1.2	1.14286	Carbamidomethylation	16829.3	Oligosaccharyltransferase complex subunit OSTC OS=Homo sapiens OX=9606 GN=OSTC PE=1 SV=1
947	TRUE	Q9UBQ7|GRHPR_HUMAN	281.821	11	11	67	69	43	45	63	72	1.02985	1.04651	1.14286	Carbamidomethylation; Oxidation (M)	35668.3	Glyoxylate reductase/hydroxypyruvate reductase OS=Homo sapiens OX=9606 GN=GRHPR PE=1 SV=1
1595	TRUE	Q16204|CCDC6_HUMAN	236.849	11	11	65	63	28	29	35	40	0.969231	1.03571	1.14286	Oxidation (M)	53290.9	Coiled-coil domain-containing protein 6 OS=Homo sapiens OX=9606 GN=CCDC6 PE=1 SV=2
1630	FALSE	O94805|ACL6B_HUMAN	71.3076	1	1	7	7	5	5	7	8	1	1	1.14286		46877.5	Actin-like protein 6B OS=Homo sapiens OX=9606 GN=ACTL6B PE=1 SV=1
4670	TRUE	P01034|CYTC_HUMAN	86.3206	2	2	3	2	3	3	7	8	0.666667	1	1.14286		15799.2	Cystatin-C OS=Homo sapiens OX=9606 GN=CST3 PE=1 SV=1
3738	TRUE	O14772|FPGT_HUMAN	129.888	4	4	12	7	1	1	7	8	0.583333	1	1.14286	Carbamidomethylation	68009.5	Fucose-1-phosphate guanylyltransferase OS=Homo sapiens OX=9606 GN=FPGT PE=1 SV=3
3036	TRUE	Q96IX5|ATPMD_HUMAN	163.278	3	3	22	24	19	17	21	24	1.09091	0.894737	1.14286		6457.57	ATP synthase membrane subunit DAPIT, mitochondrial OS=Homo sapiens OX=9606 GN=ATP5MD PE=1 SV=1
3683	TRUE	O75175|CNOT3_HUMAN	131.908	3	3	14	6	8	7	7	8	0.428571	0.875	1.14286		81872	CCR4-NOT transcription complex subunit 3 OS=Homo sapiens OX=9606 GN=CNOT3 PE=1 SV=1
3847	TRUE	Q9BUR5|MIC26_HUMAN	124.665	3	3	16	18	13	11	7	8	1.125	0.846154	1.14286		22284.6	MICOS complex subunit MIC26 OS=Homo sapiens OX=9606 GN=APOO PE=1 SV=1
3235	TRUE	Q9UHA4|LTOR3_HUMAN	153.573	6	6	23	24	38	26	14	16	1.04348	0.684211	1.14286		13622.7	Ragulator complex protein LAMTOR3 OS=Homo sapiens OX=9606 GN=LAMTOR3 PE=1 SV=1
3380	TRUE	Q9UHQ4|BAP29_HUMAN	146.119	3	3	6	2	10	6	7	8	0.333333	0.6	1.14286	Carbamidomethylation	28320.1	B-cell receptor-associated protein 29 OS=Homo sapiens OX=9606 GN=BCAP29 PE=1 SV=2
2677	TRUE	Q96JI7|SPTCS_HUMAN	181.803	12	12	17	25	13	7	7	8	1.47059	0.538462	1.14286		278868	Spatacsin OS=Homo sapiens OX=9606 GN=SPG11 PE=1 SV=3
3028	TRUE	Q6ZV73|FGD6_HUMAN	163.826	7	7	7		10	5	14	16	0.142857	0.5	1.14286	Carbamidomethylation	160816	FYVE, RhoGEF and PH domain-containing protein 6 OS=Homo sapiens OX=9606 GN=FGD6 PE=1 SV=2
1088	FALSE	Q56UQ5|TPT1L_HUMAN	126.228	2	2	26	39	14	6	14	16	1.5	0.428571	1.14286	Oxidation (M)	15756.9	TPT1-like protein OS=Homo sapiens OX=9606 PE=2 SV=2
1737	TRUE	Q68DQ2|CRBG3_HUMAN	229.034	14	14	8	4	8	3	21	24	0.5	0.375	1.14286		330633	Very large A-kinase anchor protein OS=Homo sapiens OX=9606 GN=CRYBG3 PE=1 SV=3
3916	TRUE	Q9NZN8|CNOT2_HUMAN	121.544	2	2		9	4		7	8	9	0.25	1.14286		59737.7	CCR4-NOT transcription complex subunit 2 OS=Homo sapiens OX=9606 GN=CNOT2 PE=1 SV=1
5202	TRUE	Q9Y587|AP4S1_HUMAN	63.5805	1	1	3	2			7	8	0.666667		1.14286		17004.8	AP-4 complex subunit sigma-1 OS=Homo sapiens OX=9606 GN=AP4S1 PE=1 SV=1
4381	TRUE	Q9H0C8|ILKAP_HUMAN	99.8691	2	2					7	8			1.14286		42906.5	Integrin-linked kinase-associated serine/threonine phosphatase 2C OS=Homo sapiens OX=9606 GN=ILKAP PE=1 SV=1
890	TRUE	Q9NZT2|OGFR_HUMAN	286.416	14	14	38	47	42	47	57	65	1.23684	1.11905	1.14035	Carbamidomethylation	73324.7	Opioid growth factor receptor OS=Homo sapiens OX=9606 GN=OGFR PE=1 SV=3
298	TRUE	P30043|BLVRB_HUMAN	358.575	13	13	174	158	294	311	229	261	0.908046	1.05782	1.13974	Carbamidomethylation; Oxidation (M)	22119.3	Flavin reductase (NADPH) OS=Homo sapiens OX=9606 GN=BLVRB PE=1 SV=3
2307	TRUE	Q969T9|WBP2_HUMAN	199.402	6	6	66	44	34	16	86	98	0.666667	0.470588	1.13953	Oxidation (M)	28086.9	WW domain-binding protein 2 OS=Homo sapiens OX=9606 GN=WBP2 PE=1 SV=1
1061	TRUE	P79483|DRB3_HUMAN	272.775	12	5	18	38	24	66	72	82	2.11111	2.75	1.13889	Oxidation (M); Carbamidomethylation	29962	HLA class II histocompatibility antigen, DR beta 3 chain OS=Homo sapiens OX=9606 GN=HLA-DRB3 PE=1 SV=1
1028	FALSE	P50226|ST1A2_HUMAN	216.481	5	2	24	29	63	105	36	41	1.20833	1.66667	1.13889	Oxidation (M); Carbamidomethylation	34309.7	Sulfotransferase 1A2 OS=Homo sapiens OX=9606 GN=SULT1A2 PE=1 SV=2
1607	TRUE	P42785|PCP_HUMAN	236.233	7	7	63	40	34	33	36	41	0.634921	0.970588	1.13889	Oxidation (M)	55799.8	Lysosomal Pro-X carboxypeptidase OS=Homo sapiens OX=9606 GN=PRCP PE=1 SV=1
699	TRUE	P17858|PFKAL_HUMAN	304.664	16	15	61	80	82	69	80	91	1.31148	0.841463	1.1375	Oxidation (M); Carbamidomethylation	85018.4	ATP-dependent 6-phosphofructokinase, liver type OS=Homo sapiens OX=9606 GN=PFKL PE=1 SV=6
1314	TRUE	P11766|ADHX_HUMAN	255.097	9	9	38	45	37	40	44	50	1.18421	1.08108	1.13636	Carbamidomethylation	39724.2	Alcohol dehydrogenase class-3 OS=Homo sapiens OX=9606 GN=ADH5 PE=1 SV=4
2465	TRUE	Q9UBI1|COMD3_HUMAN	191.883	8	8	19	17	21	20	22	25	0.894737	0.952381	1.13636	Carbamidomethylation	22151.1	COMM domain-containing protein 3 OS=Homo sapiens OX=9606 GN=COMMD3 PE=1 SV=1
2757	TRUE	P24386|RAE1_HUMAN	178.035	6	6	27	22	14	10	22	25	0.814815	0.714286	1.13636	Oxidation (M); Carbamidomethylation	73475.7	Rab proteins geranylgeranyltransferase component A 1 OS=Homo sapiens OX=9606 GN=CHM PE=1 SV=3
1396	TRUE	P11387|TOP1_HUMAN	249.964	16	16	59	63	17	34	59	67	1.0678	2	1.13559	Oxidation (M); Carbamidomethylation	90725.7	DNA topoisomerase 1 OS=Homo sapiens OX=9606 GN=TOP1 PE=1 SV=2
614	TRUE	P55060|XPO2_HUMAN	314.743	19	19	81	90	83	87	96	109	1.11111	1.04819	1.13542	Oxidation (M); Carbamidomethylation	110417	Exportin-2 OS=Homo sapiens OX=9606 GN=CSE1L PE=1 SV=3
2125	TRUE	Q9BUJ2|HNRL1_HUMAN	208.536	13	13	20	24	23	31	37	42	1.2	1.34783	1.13514	Carbamidomethylation; Oxidation (M)	95738.5	Heterogeneous nuclear ribonucleoprotein U-like protein 1 OS=Homo sapiens OX=9606 GN=HNRNPUL1 PE=1 SV=2
571	TRUE	P54577|SYYC_HUMAN	320.09	27	27	131	127	65	87	111	126	0.969466	1.33846	1.13514	Carbamidomethylation; Oxidation (M)	59143.5	Tyrosine--tRNA ligase, cytoplasmic OS=Homo sapiens OX=9606 GN=YARS1 PE=1 SV=4
1239	TRUE	P20618|PSB1_HUMAN	259.509	8	8	92	108	75	74	74	84	1.17391	0.986667	1.13514	Oxidation (M); Carbamidomethylation	26489.4	Proteasome subunit beta type-1 OS=Homo sapiens OX=9606 GN=PSMB1 PE=1 SV=2
872	TRUE	Q99733|NP1L4_HUMAN	288.293	16	12	99	78	91	105	89	101	0.787879	1.15385	1.13483	Carbamidomethylation; Oxidation (M)	42823.4	Nucleosome assembly protein 1-like 4 OS=Homo sapiens OX=9606 GN=NAP1L4 PE=1 SV=1
1614	TRUE	Q86TI0|TBCD1_HUMAN	235.656	11	11	36	44	14	29	52	59	1.22222	2.07143	1.13462	Carbamidomethylation; Oxidation (M)	133084	TBC1 domain family member 1 OS=Homo sapiens OX=9606 GN=TBC1D1 PE=1 SV=2
914	FALSE	B2RPK0|HGB1A_HUMAN	237.708	7	5	30	58	67	59	52	59	1.93333	0.880597	1.13462	Oxidation (M); Carbamidomethylation	24238	Putative high mobility group protein B1-like 1 OS=Homo sapiens OX=9606 GN=HMGB1P1 PE=5 SV=1
2377	TRUE	O43172|PRP4_HUMAN	195.603	7	7	15	14	6	11	15	17	0.933333	1.83333	1.13333	Carbamidomethylation	58449.2	U4/U6 small nuclear ribonucleoprotein Prp4 OS=Homo sapiens OX=9606 GN=PRPF4 PE=1 SV=2
818	TRUE	Q96SB3|NEB2_HUMAN	292.366	18	17	42	49	37	50	45	51	1.16667	1.35135	1.13333	Oxidation (M); Carbamidomethylation	89334.2	Neurabin-2 OS=Homo sapiens OX=9606 GN=PPP1R9B PE=1 SV=3
2041	TRUE	Q9UJ68|MSRA_HUMAN	212.919	7	7	21	27	12	14	30	34	1.28571	1.16667	1.13333	Carbamidomethylation; Oxidation (M)	26132.5	Mitochondrial peptide methionine sulfoxide reductase OS=Homo sapiens OX=9606 GN=MSRA PE=1 SV=1
1848	TRUE	P59998|ARPC4_HUMAN	223.252	9	9	35	37	44	42	45	51	1.05714	0.954545	1.13333	Carbamidomethylation	19667	Actin-related protein 2/3 complex subunit 4 OS=Homo sapiens OX=9606 GN=ARPC4 PE=1 SV=3
1250	TRUE	Q9UQ80|PA2G4_HUMAN	258.782	13	13	81	100	74	55	75	85	1.23457	0.743243	1.13333	Carbamidomethylation; Oxidation (M)	43786.9	Proliferation-associated protein 2G4 OS=Homo sapiens OX=9606 GN=PA2G4 PE=1 SV=3
3601	TRUE	Q8WY22|BRI3B_HUMAN	136.164	2	2	6	7	12	8	15	17	1.16667	0.666667	1.13333		27835.5	BRI3-binding protein OS=Homo sapiens OX=9606 GN=BRI3BP PE=1 SV=1
1924	TRUE	Q9BW91|NUDT9_HUMAN	219.14	7	7	30	23	22	14	15	17	0.766667	0.636364	1.13333	Carbamidomethylation; Oxidation (M)	39125	ADP-ribose pyrophosphatase, mitochondrial OS=Homo sapiens OX=9606 GN=NUDT9 PE=1 SV=1
2659	TRUE	Q6PD62|CTR9_HUMAN	182.504	8	8	22	11	13	7	15	17	0.5	0.538462	1.13333	Carbamidomethylation	133502	RNA polymerase-associated protein CTR9 homolog OS=Homo sapiens OX=9606 GN=CTR9 PE=1 SV=1
1836	TRUE	P09417|DHPR_HUMAN	223.63	8	8	17	18	29	12	30	34	1.05882	0.413793	1.13333	Oxidation (M); Carbamidomethylation	25789.5	Dihydropteridine reductase OS=Homo sapiens OX=9606 GN=QDPR PE=1 SV=2
355	TRUE	Q9NUQ9|CYRIB_HUMAN	349.361	20	18	204	211	210	222	166	188	1.03431	1.05714	1.13253	Oxidation (M); Carbamidomethylation	36748	CYFIP-related Rac1 interactor B OS=Homo sapiens OX=9606 GN=CYRIB PE=1 SV=1
560	TRUE	P43686|PRS6B_HUMAN	320.766	18	18	118	105	113	124	174	197	0.889831	1.09735	1.13218	Oxidation (M); Carbamidomethylation	47366.2	26S proteasome regulatory subunit 6B OS=Homo sapiens OX=9606 GN=PSMC4 PE=1 SV=2
293	TRUE	Q9BWD1|THIC_HUMAN	359.153	16	16	192	142	280	192	91	103	0.739583	0.685714	1.13187	Carbamidomethylation; Oxidation (M)	41350.8	Acetyl-CoA acetyltransferase, cytosolic OS=Homo sapiens OX=9606 GN=ACAT2 PE=1 SV=2
1602	TRUE	P11234|RALB_HUMAN	236.415	7	4	66	66	50	42	38	43	1	0.84	1.13158	Oxidation (M)	23408.5	Ras-related protein Ral-B OS=Homo sapiens OX=9606 GN=RALB PE=1 SV=1
1852	TRUE	O43665|RGS10_HUMAN	222.825	9	9	32	45	46	45	61	69	1.40625	0.978261	1.13115	Carbamidomethylation; Oxidation (M)	21209.9	Regulator of G-protein signaling 10 OS=Homo sapiens OX=9606 GN=RGS10 PE=1 SV=3
1060	TRUE	O43426|SYNJ1_HUMAN	272.973	17	17	35	39	21	32	46	52	1.11429	1.52381	1.13043	Oxidation (M); Carbamidomethylation	173103	Synaptojanin-1 OS=Homo sapiens OX=9606 GN=SYNJ1 PE=1 SV=2
1866	TRUE	Q9NUY8|TBC23_HUMAN	222.032	8	8	16	14	17	19	23	26	0.875	1.11765	1.13043	Carbamidomethylation	78321.9	TBC1 domain family member 23 OS=Homo sapiens OX=9606 GN=TBC1D23 PE=1 SV=3
1431	TRUE	Q16718|NDUA5_HUMAN	247.245	8	8	52	55	23	23	23	26	1.05769	1	1.13043	Carbamidomethylation	13458.7	NADH dehydrogenase [ubiquinone] 1 alpha subcomplex subunit 5 OS=Homo sapiens OX=9606 GN=NDUFA5 PE=1 SV=3
825	TRUE	Q86V81|THOC4_HUMAN	292.007	12	12	108	119	57	74	77	87	1.10185	1.29825	1.12987	Oxidation (M)	26887.9	THO complex subunit 4 OS=Homo sapiens OX=9606 GN=ALYREF PE=1 SV=3
1229	TRUE	P49591|SYSC_HUMAN	260.144	18	18	112	79	60	76	77	87	0.705357	1.26667	1.12987	Oxidation (M); Carbamidomethylation	58777.3	Serine--tRNA ligase, cytoplasmic OS=Homo sapiens OX=9606 GN=SARS1 PE=1 SV=3
896	TRUE	Q96CV9|OPTN_HUMAN	285.986	18	18	80	77	73	79	54	61	0.9625	1.08219	1.12963	Oxidation (M); Carbamidomethylation	65922	Optineurin OS=Homo sapiens OX=9606 GN=OPTN PE=1 SV=3
1996	TRUE	Q8IXM2|BAP18_HUMAN	215.378	7	7	22	27	8	26	31	35	1.22727	3.25	1.12903	Oxidation (M)	17900.4	Chromatin complexes subunit BAP18 OS=Homo sapiens OX=9606 GN=BAP18 PE=1 SV=1
1384	TRUE	Q9NTI5|PDS5B_HUMAN	250.694	11	11	34	42	16	22	31	35	1.23529	1.375	1.12903		164667	Sister chromatid cohesion protein PDS5 homolog B OS=Homo sapiens OX=9606 GN=PDS5B PE=1 SV=1
1391	TRUE	P62714|PP2AB_HUMAN	250.126	10	1	23	28	24	27	31	35	1.21739	1.125	1.12903	Oxidation (M); Carbamidomethylation	35575.1	Serine/threonine-protein phosphatase 2A catalytic subunit beta isoform OS=Homo sapiens OX=9606 GN=PPP2CB PE=1 SV=1
619	TRUE	O60784|TOM1_HUMAN	314.324	19	19	127	96	91	80	70	79	0.755906	0.879121	1.12857	Oxidation (M); Carbamidomethylation	53818.4	Target of Myb protein 1 OS=Homo sapiens OX=9606 GN=TOM1 PE=1 SV=2
580	TRUE	Q9NR45|SIAS_HUMAN	318.393	15	15	152	167	98	122	109	123	1.09868	1.2449	1.12844	Oxidation (M); Carbamidomethylation	40307.5	Sialic acid synthase OS=Homo sapiens OX=9606 GN=NANS PE=1 SV=2
2555	TRUE	Q2TAA2|IAH1_HUMAN	187.068	5	5	26	26	35	30	39	44	1	0.857143	1.12821		27598.7	Isoamyl acetate-hydrolyzing esterase 1 homolog OS=Homo sapiens OX=9606 GN=IAH1 PE=1 SV=1
2105	TRUE	P18085|ARF4_HUMAN	209.946	9	4	81	114	91	91	86	97	1.40741	1	1.12791	Oxidation (M)	20510.8	ADP-ribosylation factor 4 OS=Homo sapiens OX=9606 GN=ARF4 PE=1 SV=3
1336	TRUE	O14979|HNRDL_HUMAN	253.557	8	7	102	110	73	61	86	97	1.07843	0.835616	1.12791	Carbamidomethylation; Oxidation (M)	46437.5	Heterogeneous nuclear ribonucleoprotein D-like OS=Homo sapiens OX=9606 GN=HNRNPDL PE=1 SV=3
1628	TRUE	Q15052|ARHG6_HUMAN	234.947	13	10	28	34	30	19	47	53	1.21429	0.633333	1.12766	Carbamidomethylation	87498.8	Rho guanine nucleotide exchange factor 6 OS=Homo sapiens OX=9606 GN=ARHGEF6 PE=1 SV=2
513	TRUE	Q92888|ARHG1_HUMAN	327.907	17	17	59	53	65	74	55	62	0.898305	1.13846	1.12727	Carbamidomethylation; Oxidation (M)	102435	Rho guanine nucleotide exchange factor 1 OS=Homo sapiens OX=9606 GN=ARHGEF1 PE=1 SV=2
1163	TRUE	P06280|AGAL_HUMAN	265.45	13	13	37	34	39	39	63	71	0.918919	1	1.12698	Carbamidomethylation; Oxidation (M)	48766.8	Alpha-galactosidase A OS=Homo sapiens OX=9606 GN=GLA PE=1 SV=1
1262	TRUE	P25786|PSA1_HUMAN	258.023	8	8	50	60	55	52	63	71	1.2	0.945455	1.12698	Oxidation (M); Carbamidomethylation	29555.6	Proteasome subunit alpha type-1 OS=Homo sapiens OX=9606 GN=PSMA1 PE=1 SV=1
4093	TRUE	P34810|CD68_HUMAN	114.242	3	3	6			12	8	9	0.166667	12	1.125	Carbamidomethylation	37408.2	Macrosialin OS=Homo sapiens OX=9606 GN=CD68 PE=1 SV=2
4892	TRUE	O95298|NDUC2_HUMAN	76.2942	2	2	10	8	1	4	8	9	0.8	4	1.125		14187.5	NADH dehydrogenase [ubiquinone] 1 subunit C2 OS=Homo sapiens OX=9606 GN=NDUFC2 PE=1 SV=1
2024	TRUE	P13807|GYS1_HUMAN	214.033	6	6	25	12	10	22	16	18	0.48	2.2	1.125		83785.5	Glycogen [starch] synthase, muscle OS=Homo sapiens OX=9606 GN=GYS1 PE=1 SV=2
3513	TRUE	Q9H6E4|CC134_HUMAN	139.978	3	3	15	10	2	4	8	9	0.666667	2	1.125		26560.6	Coiled-coil domain-containing protein 134 OS=Homo sapiens OX=9606 GN=CCDC134 PE=1 SV=1
3333	TRUE	P67812|SC11A_HUMAN	148.571	3	3	20	15	9	16	16	18	0.75	1.77778	1.125	Oxidation (M)	20625.3	Signal peptidase complex catalytic subunit SEC11A OS=Homo sapiens OX=9606 GN=SEC11A PE=1 SV=1
2587	TRUE	O14981|BTAF1_HUMAN	185.548	8	8	17	26	4	7	8	9	1.52941	1.75	1.125	Carbamidomethylation	206887	TATA-binding protein-associated factor 172 OS=Homo sapiens OX=9606 GN=BTAF1 PE=1 SV=2
2126	TRUE	Q9HCE0|EPG5_HUMAN	208.501	11	11	21	14	11	19	16	18	0.666667	1.72727	1.125	Carbamidomethylation	292481	Ectopic P granules protein 5 homolog OS=Homo sapiens OX=9606 GN=EPG5 PE=1 SV=2
1902	TRUE	P25789|PSA4_HUMAN	220.164	8	8	37	61	35	54	32	36	1.64865	1.54286	1.125	Carbamidomethylation; Oxidation (M)	29483.8	Proteasome subunit alpha type-4 OS=Homo sapiens OX=9606 GN=PSMA4 PE=1 SV=1
1610	TRUE	Q99961|SH3G1_HUMAN	236.041	9	9	45	41	49	54	56	63	0.911111	1.10204	1.125	Oxidation (M); Carbamidomethylation	41489.9	Endophilin-A2 OS=Homo sapiens OX=9606 GN=SH3GL1 PE=1 SV=1
4366	TRUE	Q9BRT2|UQCC2_HUMAN	100.302	2	2	4	6	8	8	8	9	1.5	1	1.125		14874.8	Ubiquinol-cytochrome-c reductase complex assembly factor 2 OS=Homo sapiens OX=9606 GN=UQCC2 PE=1 SV=1
3645	TRUE	Q9HA64|KT3K_HUMAN	133.588	3	3	9	10	7	7	8	9	1.11111	1	1.125		34412.2	Ketosamine-3-kinase OS=Homo sapiens OX=9606 GN=FN3KRP PE=1 SV=2
1678	TRUE	O14874|BCKD_HUMAN	232.401	9	9	33	39	33	28	24	27	1.18182	0.848485	1.125	Oxidation (M); Carbamidomethylation	46360.5	[3-methyl-2-oxobutanoate dehydrogenase [lipoamide]] kinase, mitochondrial OS=Homo sapiens OX=9606 GN=BCKDK PE=1 SV=2
1690	TRUE	Q6Y7W6|GGYF2_HUMAN	231.668	11	11	46	23	44	33	56	63	0.5	0.75	1.125	Oxidation (M)	150070	GRB10-interacting GYF protein 2 OS=Homo sapiens OX=9606 GN=GIGYF2 PE=1 SV=1
4467	TRUE	Q13772|NCOA4_HUMAN	96.1911	2	2	4	7	6	4	8	9	1.75	0.666667	1.125		69726.1	Nuclear receptor coactivator 4 OS=Homo sapiens OX=9606 GN=NCOA4 PE=1 SV=1
2428	TRUE	Q8WUX9|CHMP7_HUMAN	193.745	6	6	6	8	16	10	16	18	1.33333	0.625	1.125		50910.9	Charged multivesicular body protein 7 OS=Homo sapiens OX=9606 GN=CHMP7 PE=1 SV=1
3168	TRUE	P51606|RENBP_HUMAN	157.136	6	6	9	9	15	9	16	18	1	0.6	1.125	Carbamidomethylation	48830.9	N-acylglucosamine 2-epimerase OS=Homo sapiens OX=9606 GN=RENBP PE=1 SV=2
3415	TRUE	Q8TBF2|PXL2B_HUMAN	144.431	3	3	12	7	9	3	8	9	0.583333	0.333333	1.125		21222.5	Prostamide/prostaglandin F synthase OS=Homo sapiens OX=9606 GN=PRXL2B PE=1 SV=1
3796	TRUE	O15162|PLS1_HUMAN	126.935	2	2	12	9			8	9	0.75		1.125	Carbamidomethylation	35049.1	Phospholipid scramblase 1 OS=Homo sapiens OX=9606 GN=PLSCR1 PE=1 SV=1
327	TRUE	A0AVT1|UBA6_HUMAN	355.26	30	30	121	127	82	117	113	127	1.04959	1.42683	1.12389	Carbamidomethylation; Oxidation (M)	117970	Ubiquitin-like modifier-activating enzyme 6 OS=Homo sapiens OX=9606 GN=UBA6 PE=1 SV=1
1558	TRUE	P50213|IDH3A_HUMAN	238.745	11	11	50	63	43	58	49	55	1.26	1.34884	1.12245	Carbamidomethylation; Oxidation (M)	39591.7	Isocitrate dehydrogenase [NAD] subunit alpha, mitochondrial OS=Homo sapiens OX=9606 GN=IDH3A PE=1 SV=1
1076	TRUE	Q9BYX2|TBD2A_HUMAN	272.1	18	18	48	62	46	61	49	55	1.29167	1.32609	1.12245	Carbamidomethylation; Oxidation (M)	105414	TBC1 domain family member 2A OS=Homo sapiens OX=9606 GN=TBC1D2 PE=1 SV=3
1174	TRUE	Q96B97|SH3K1_HUMAN	264.417	15	15	40	58	25	30	49	55	1.45	1.2	1.12245	Carbamidomethylation; Oxidation (M)	73126.3	SH3 domain-containing kinase-binding protein 1 OS=Homo sapiens OX=9606 GN=SH3KBP1 PE=1 SV=2
1173	TRUE	P98171|RHG04_HUMAN	264.557	18	18	42	33	30	32	49	55	0.785714	1.06667	1.12245	Carbamidomethylation; Oxidation (M)	105026	Rho GTPase-activating protein 4 OS=Homo sapiens OX=9606 GN=ARHGAP4 PE=1 SV=2
810	TRUE	P36871|PGM1_HUMAN	293.403	16	16	88	58	63	56	49	55	0.659091	0.888889	1.12245	Oxidation (M); Carbamidomethylation	61449.1	Phosphoglucomutase-1 OS=Homo sapiens OX=9606 GN=PGM1 PE=1 SV=3
772	TRUE	P14868|SYDC_HUMAN	298.317	15	15	90	67	90	76	90	101	0.744444	0.844444	1.12222	Oxidation (M); Carbamidomethylation	57136.2	Aspartate--tRNA ligase, cytoplasmic OS=Homo sapiens OX=9606 GN=DARS1 PE=1 SV=2
1334	TRUE	Q8WWP7|GIMA1_HUMAN	253.592	7	7	39	42	22	42	41	46	1.07692	1.90909	1.12195	Oxidation (M); Carbamidomethylation	34369.1	GTPase IMAP family member 1 OS=Homo sapiens OX=9606 GN=GIMAP1 PE=1 SV=1
838	TRUE	P53675|CLH2_HUMAN	290.83	17	2	96	102	93	94	123	138	1.0625	1.01075	1.12195	Oxidation (M); Carbamidomethylation	187030	Clathrin heavy chain 2 OS=Homo sapiens OX=9606 GN=CLTCL1 PE=1 SV=2
620	TRUE	P55209|NP1L1_HUMAN	314.3	15	11	141	151	177	150	156	175	1.07092	0.847458	1.12179	Oxidation (M); Carbamidomethylation	45374.2	Nucleosome assembly protein 1-like 1 OS=Homo sapiens OX=9606 GN=NAP1L1 PE=1 SV=1
307	TRUE	Q15833|STXB2_HUMAN	357.371	24	24	130	133	143	153	140	157	1.02308	1.06993	1.12143	Carbamidomethylation; Oxidation (M)	66452.5	Syntaxin-binding protein 2 OS=Homo sapiens OX=9606 GN=STXBP2 PE=1 SV=2
333	TRUE	P48147|PPCE_HUMAN	354	21	21	90	111	91	98	116	130	1.23333	1.07692	1.12069	Carbamidomethylation; Oxidation (M)	80699.5	Prolyl endopeptidase OS=Homo sapiens OX=9606 GN=PREP PE=1 SV=2
725	TRUE	Q9UJ70|NAGK_HUMAN	302.205	13	13	162	158	70	74	133	149	0.975309	1.05714	1.1203	Oxidation (M); Carbamidomethylation	37375.7	N-acetyl-D-glucosamine kinase OS=Homo sapiens OX=9606 GN=NAGK PE=1 SV=4
2207	TRUE	P30837|AL1B1_HUMAN	204.599	8	8	40	38	6	10	25	28	0.95	1.66667	1.12		57206.3	Aldehyde dehydrogenase X, mitochondrial OS=Homo sapiens OX=9606 GN=ALDH1B1 PE=1 SV=3
3195	TRUE	P23434|GCSH_HUMAN	155.853	3	3	60	62	40	59	50	56	1.03333	1.475	1.12	Carbamidomethylation; Oxidation (M)	18884.6	Glycine cleavage system H protein, mitochondrial OS=Homo sapiens OX=9606 GN=GCSH PE=1 SV=2
2116	TRUE	P12318|FCG2A_HUMAN	208.84	5	3	27	42	51	71	75	84	1.55556	1.39216	1.12	Carbamidomethylation; Oxidation (M)	35000.7	Low affinity immunoglobulin gamma Fc region receptor II-a OS=Homo sapiens OX=9606 GN=FCGR2A PE=1 SV=4
1930	TRUE	P01111|RASN_HUMAN	219.026	9	2	50	46	42	46	50	56	0.92	1.09524	1.12	Oxidation (M); Carbamidomethylation	21229.2	GTPase NRas OS=Homo sapiens OX=9606 GN=NRAS PE=1 SV=1
2135	TRUE	Q9Y315|DEOC_HUMAN	208.242	8	8	36	35	12	11	25	28	0.972222	0.916667	1.12	Oxidation (M)	35230.8	Deoxyribose-phosphate aldolase OS=Homo sapiens OX=9606 GN=DERA PE=1 SV=2
1552	TRUE	P51531|SMCA2_HUMAN	239.176	11	7	25	33	19	17	25	28	1.32	0.894737	1.12	Carbamidomethylation; Oxidation (M)	181279	Probable global transcription activator SNF2L2 OS=Homo sapiens OX=9606 GN=SMARCA2 PE=1 SV=2
15	TRUE	P06733|ENOA_HUMAN	535.544	73	65	3693	3633	3327	2936	3667	4107	0.983753	0.882477	1.11999	Oxidation (M); Carbamidomethylation	47169	Alpha-enolase OS=Homo sapiens OX=9606 GN=ENO1 PE=1 SV=2
2850	TRUE	P13984|T2FB_HUMAN	172.869	6	6	11	13	2	4	17	19	1.18182	2	1.11765	Oxidation (M)	28380.3	General transcription factor IIF subunit 2 OS=Homo sapiens OX=9606 GN=GTF2F2 PE=1 SV=2
1210	TRUE	Q86TU7|SETD3_HUMAN	261.761	12	12	15	11	28	22	34	38	0.733333	0.785714	1.11765		67257.1	Actin-histidine N-methyltransferase OS=Homo sapiens OX=9606 GN=SETD3 PE=1 SV=1
2261	TRUE	Q9C0E8|LNP_HUMAN	201.794	7	7	22	34	29	18	17	19	1.54545	0.62069	1.11765	Carbamidomethylation	47739.9	Endoplasmic reticulum junction formation protein lunapark OS=Homo sapiens OX=9606 GN=LNPK PE=1 SV=2
82	TRUE	Q15075|EEA1_HUMAN	434.808	63	63	284	266	210	213	196	219	0.93662	1.01429	1.11735	Carbamidomethylation; Oxidation (M)	162466	Early endosome antigen 1 OS=Homo sapiens OX=9606 GN=EEA1 PE=1 SV=2
341	TRUE	P62191|PRS4_HUMAN	352.656	21	20	191	176	148	162	179	200	0.921466	1.09459	1.11732	Carbamidomethylation; Oxidation (M)	49184.5	26S proteasome regulatory subunit 4 OS=Homo sapiens OX=9606 GN=PSMC1 PE=1 SV=1
1814	TRUE	O14497|ARI1A_HUMAN	224.446	8	7	19	15	6	10	26	29	0.789474	1.66667	1.11538	Carbamidomethylation	242045	AT-rich interactive domain-containing protein 1A OS=Homo sapiens OX=9606 GN=ARID1A PE=1 SV=3
1519	TRUE	P40818|UBP8_HUMAN	241.375	11	11	24	29	26	30	26	29	1.20833	1.15385	1.11538	Oxidation (M)	127523	Ubiquitin carboxyl-terminal hydrolase 8 OS=Homo sapiens OX=9606 GN=USP8 PE=1 SV=1
420	TRUE	P30086|PEBP1_HUMAN	338.327	13	13	133	114	133	121	130	145	0.857143	0.909774	1.11538	Carbamidomethylation	21056.8	Phosphatidylethanolamine-binding protein 1 OS=Homo sapiens OX=9606 GN=PEBP1 PE=1 SV=3
1245	TRUE	Q08257|QOR_HUMAN	259.111	11	11	10	12	23	20	26	29	1.2	0.869565	1.11538	Carbamidomethylation	35206.6	Quinone oxidoreductase OS=Homo sapiens OX=9606 GN=CRYZ PE=1 SV=1
2098	TRUE	P45973|CBX5_HUMAN	210.421	7	6	29	21	26	20	26	29	0.724138	0.769231	1.11538	Carbamidomethylation; Oxidation (M)	22225	Chromobox protein homolog 5 OS=Homo sapiens OX=9606 GN=CBX5 PE=1 SV=1
177	TRUE	P14317|HCLS1_HUMAN	387.663	26	26	257	264	253	235	219	244	1.02724	0.928854	1.11416	Oxidation (M); Carbamidomethylation	54014	Hematopoietic lineage cell-specific protein OS=Homo sapiens OX=9606 GN=HCLS1 PE=1 SV=3
962	TRUE	P55795|HNRH2_HUMAN	279.804	9	6	103	99	58	75	88	98	0.961165	1.2931	1.11364	Oxidation (M); Carbamidomethylation	49263.6	Heterogeneous nuclear ribonucleoprotein H2 OS=Homo sapiens OX=9606 GN=HNRNPH2 PE=1 SV=1
228	TRUE	Q8WUM4|PDC6I_HUMAN	373.543	39	39	159	158	170	140	186	207	0.993711	0.823529	1.1129	Carbamidomethylation; Oxidation (M)	96023.2	Programmed cell death 6-interacting protein OS=Homo sapiens OX=9606 GN=PDCD6IP PE=1 SV=1
485	TRUE	P09525|ANXA4_HUMAN	330.886	19	18	120	109	128	155	125	139	0.908333	1.21094	1.112	Oxidation (M); Carbamidomethylation	35882.7	Annexin A4 OS=Homo sapiens OX=9606 GN=ANXA4 PE=1 SV=4
4148	TRUE	Q7Z333|SETX_HUMAN	111.551	4	4	6	2		4	9	10	0.333333	4	1.11111		302880	Probable helicase senataxin OS=Homo sapiens OX=9606 GN=SETX PE=1 SV=4
3160	TRUE	Q96T37|RBM15_HUMAN	157.492	5	5	11	13	4	10	9	10	1.18182	2.5	1.11111		107189	RNA-binding protein 15 OS=Homo sapiens OX=9606 GN=RBM15 PE=1 SV=2
3669	TRUE	O43374|RASL2_HUMAN	132.761	4	4	7	2	4	9	9	10	0.285714	2.25	1.11111	Oxidation (M); Carbamidomethylation	90457.6	Ras GTPase-activating protein 4 OS=Homo sapiens OX=9606 GN=RASA4 PE=2 SV=2
3669	FALSE	C9J798|RAS4B_HUMAN	115.682	3	3	4		4	9	9	10	0.25	2.25	1.11111	Oxidation (M); Carbamidomethylation	90406.5	Ras GTPase-activating protein 4B OS=Homo sapiens OX=9606 GN=RASA4B PE=3 SV=2
3449	TRUE	O15530|PDPK1_HUMAN	142.532	7	7	7	6		2	9	10	0.857143	2	1.11111		63151.8	3-phosphoinositide-dependent protein kinase 1 OS=Homo sapiens OX=9606 GN=PDPK1 PE=1 SV=1
2597	TRUE	Q9H2U1|DHX36_HUMAN	185.138	6	6	14	13	8	15	9	10	0.928571	1.875	1.11111	Carbamidomethylation	114760	ATP-dependent DNA/RNA helicase DHX36 OS=Homo sapiens OX=9606 GN=DHX36 PE=1 SV=2
3922	TRUE	Q9BQE4|SELS_HUMAN	121.324	3	3	7	7	10	16	9	10	1	1.6	1.11111	Oxidation (M)	21131.8	Selenoprotein S OS=Homo sapiens OX=9606 GN=SELENOS PE=1 SV=3
2737	TRUE	Q9UNP9|PPIE_HUMAN	179.127	5	5	7	6	4	5	9	10	0.857143	1.25	1.11111		33430.8	Peptidyl-prolyl cis-trans isomerase E OS=Homo sapiens OX=9606 GN=PPIE PE=1 SV=1
1186	TRUE	Q9UN86|G3BP2_HUMAN	263.712	10	10	65	68	61	62	81	90	1.04615	1.01639	1.11111	Oxidation (M); Carbamidomethylation	54121.1	Ras GTPase-activating protein-binding protein 2 OS=Homo sapiens OX=9606 GN=G3BP2 PE=1 SV=2
4062	TRUE	Q86WB0|NIPA_HUMAN	115.434	3	3	4	6	4	4	9	10	1.5	1	1.11111	Oxidation (M)	55261.5	Nuclear-interacting partner of ALK OS=Homo sapiens OX=9606 GN=ZC3HC1 PE=1 SV=1
3441	TRUE	P62899|RL31_HUMAN	142.849	3	3	30	24	12	9	9	10	0.8	0.75	1.11111	Oxidation (M)	14462.9	60S ribosomal protein L31 OS=Homo sapiens OX=9606 GN=RPL31 PE=1 SV=1
4000	TRUE	Q9Y2U5|M3K2_HUMAN	117.852	3	1	6	5	6	4	9	10	0.833333	0.666667	1.11111	Carbamidomethylation	69740.9	Mitogen-activated protein kinase kinase kinase 2 OS=Homo sapiens OX=9606 GN=MAP3K2 PE=1 SV=2
1770	TRUE	P12004|PCNA_HUMAN	227.591	8	8	15	3	58	37	45	50	0.2	0.637931	1.11111	Oxidation (M); Carbamidomethylation	28768.8	Proliferating cell nuclear antigen OS=Homo sapiens OX=9606 GN=PCNA PE=1 SV=1
3510	TRUE	Q8ND24|RN214_HUMAN	140.022	6	6	9	4	6	3	9	10	0.444444	0.5	1.11111		77667.4	RING finger protein 214 OS=Homo sapiens OX=9606 GN=RNF214 PE=1 SV=2
3401	TRUE	Q7Z6L1|TCPR1_HUMAN	145.27	4	4	4	5	6	2	9	10	1.25	0.333333	1.11111	Carbamidomethylation	129696	Tectonin beta-propeller repeat-containing protein 1 OS=Homo sapiens OX=9606 GN=TECPR1 PE=1 SV=1
3950	TRUE	P85037|FOXK1_HUMAN	120.111	3	3	9	5	13	4	9	10	0.555556	0.307692	1.11111		75457.3	Forkhead box protein K1 OS=Homo sapiens OX=9606 GN=FOXK1 PE=1 SV=1
5179	TRUE	Q6ZS30|NBEL1_HUMAN	64.6968	2	2	4	12			9	10	3		1.11111		307237	Neurobeachin-like protein 1 OS=Homo sapiens OX=9606 GN=NBEAL1 PE=2 SV=3
4727	TRUE	Q16827|PTPRO_HUMAN	83.6444	2	2	9	4			9	10	0.444444		1.11111		138344	Receptor-type tyrosine-protein phosphatase O OS=Homo sapiens OX=9606 GN=PTPRO PE=1 SV=2
71	TRUE	P08575|PTPRC_HUMAN	441.673	55	55	337	399	256	342	335	372	1.18398	1.33594	1.11045	Oxidation (M); Carbamidomethylation	147486	Receptor-type tyrosine-protein phosphatase C OS=Homo sapiens OX=9606 GN=PTPRC PE=1 SV=3
1651	TRUE	P48595|SPB10_HUMAN	233.835	8	8	20	28	19	28	64	71	1.4	1.47368	1.10938	Oxidation (M)	45402.7	Serpin B10 OS=Homo sapiens OX=9606 GN=SERPINB10 PE=1 SV=1
845	TRUE	P05198|IF2A_HUMAN	290.471	16	16	38	41	53	56	55	61	1.07895	1.0566	1.10909	Carbamidomethylation; Oxidation (M)	36112.2	Eukaryotic translation initiation factor 2 subunit 1 OS=Homo sapiens OX=9606 GN=EIF2S1 PE=1 SV=3
860	TRUE	O00170|AIP_HUMAN	289.342	12	12	65	73	62	48	74	82	1.12308	0.774194	1.10811	Oxidation (M); Carbamidomethylation	37636	AH receptor-interacting protein OS=Homo sapiens OX=9606 GN=AIP PE=1 SV=2
1769	TRUE	O75822|EIF3J_HUMAN	227.608	7	7	26	25	34	34	28	31	0.961538	1	1.10714	Oxidation (M); Carbamidomethylation	29062.4	Eukaryotic translation initiation factor 3 subunit J OS=Homo sapiens OX=9606 GN=EIF3J PE=1 SV=2
3172	TRUE	Q9NZ01|TECR_HUMAN	157.073	5	5	36	35	21	20	28	31	0.972222	0.952381	1.10714		36034.4	Very-long-chain enoyl-CoA reductase OS=Homo sapiens OX=9606 GN=TECR PE=1 SV=1
435	TRUE	Q8TD55|PKHO2_HUMAN	336.78	20	20	142	149	166	187	178	197	1.0493	1.12651	1.10674	Carbamidomethylation; Oxidation (M)	53349.9	Pleckstrin homology domain-containing family O member 2 OS=Homo sapiens OX=9606 GN=PLEKHO2 PE=1 SV=1
1107	TRUE	P50416|CPT1A_HUMAN	269.676	12	12	51	63	57	71	94	104	1.23529	1.24561	1.10638	Oxidation (M); Carbamidomethylation	88367.6	Carnitine O-palmitoyltransferase 1, liver isoform OS=Homo sapiens OX=9606 GN=CPT1A PE=1 SV=2
1910	TRUE	Q9H0Q0|CYRIA_HUMAN	219.55	9	7	81	90	46	51	47	52	1.11111	1.1087	1.10638	Oxidation (M)	37312.8	CYFIP-related Rac1 interactor A OS=Homo sapiens OX=9606 GN=CYRIA PE=2 SV=1
960	TRUE	Q9H3U1|UN45A_HUMAN	279.855	14	14	51	60	44	42	47	52	1.17647	0.954545	1.10638	Carbamidomethylation; Oxidation (M)	103077	Protein unc-45 homolog A OS=Homo sapiens OX=9606 GN=UNC45A PE=1 SV=1
382	TRUE	P05091|ALDH2_HUMAN	345.162	23	22	141	186	41	77	104	115	1.31915	1.87805	1.10577	Carbamidomethylation; Oxidation (M)	56381.3	Aldehyde dehydrogenase, mitochondrial OS=Homo sapiens OX=9606 GN=ALDH2 PE=1 SV=2
129	TRUE	P08567|PLEK_HUMAN	405.381	22	22	222	268	238	264	350	387	1.20721	1.10924	1.10571	Carbamidomethylation; Oxidation (M)	40124.9	Pleckstrin OS=Homo sapiens OX=9606 GN=PLEK PE=1 SV=3
2663	TRUE	Q9BYJ9|YTHD1_HUMAN	182.267	6	3	18	7		3	19	21	0.388889	3	1.10526	Oxidation (M); Carbamidomethylation	60873.6	YTH domain-containing family protein 1 OS=Homo sapiens OX=9606 GN=YTHDF1 PE=1 SV=1
2885	TRUE	Q9H553|ALG2_HUMAN	171.471	5	5	23	28	9	21	19	21	1.21739	2.33333	1.10526	Oxidation (M)	47091.5	Alpha-1,3/1,6-mannosyltransferase ALG2 OS=Homo sapiens OX=9606 GN=ALG2 PE=1 SV=1
2161	TRUE	Q10570|CPSF1_HUMAN	206.481	9	9	15	17	7	16	19	21	1.13333	2.28571	1.10526		160884	Cleavage and polyadenylation specificity factor subunit 1 OS=Homo sapiens OX=9606 GN=CPSF1 PE=1 SV=2
2645	TRUE	O43181|NDUS4_HUMAN	183.267	7	7	23	26	11	14	19	21	1.13043	1.27273	1.10526		20108	NADH dehydrogenase [ubiquinone] iron-sulfur protein 4, mitochondrial OS=Homo sapiens OX=9606 GN=NDUFS4 PE=1 SV=1
1220	TRUE	Q13636|RAB31_HUMAN	260.98	9	7	67	51	35	44	57	63	0.761194	1.25714	1.10526	Carbamidomethylation; Oxidation (M)	21568.8	Ras-related protein Rab-31 OS=Homo sapiens OX=9606 GN=RAB31 PE=1 SV=1
2945	TRUE	Q08209|PP2BA_HUMAN	167.69	7	3	13	7	14	16	19	21	0.538462	1.14286	1.10526	Oxidation (M)	58687.8	Serine/threonine-protein phosphatase 2B catalytic subunit alpha isoform OS=Homo sapiens OX=9606 GN=PPP3CA PE=1 SV=1
1903	TRUE	Q7Z3J2|VP35L_HUMAN	220.047	12	12	12	13	17	17	19	21	1.08333	1	1.10526	Carbamidomethylation; Oxidation (M)	109563	VPS35 endosomal protein sorting factor-like OS=Homo sapiens OX=9606 GN=VPS35L PE=1 SV=2
729	TRUE	Q9UKG1|DP13A_HUMAN	302.026	19	19	46	36	51	47	38	42	0.782609	0.921569	1.10526	Carbamidomethylation; Oxidation (M)	79663.5	DCC-interacting protein 13-alpha OS=Homo sapiens OX=9606 GN=APPL1 PE=1 SV=1
2815	TRUE	O43768|ENSA_HUMAN	174.896	4	3	22	22	26	23	19	21	1	0.884615	1.10526	Oxidation (M)	13389	Alpha-endosulfine OS=Homo sapiens OX=9606 GN=ENSA PE=1 SV=1
973	TRUE	P51858|HDGF_HUMAN	279.284	9	9	107	122	70	83	86	95	1.14019	1.18571	1.10465	Oxidation (M); Carbamidomethylation	26788.3	Hepatoma-derived growth factor OS=Homo sapiens OX=9606 GN=HDGF PE=1 SV=1
323	TRUE	P62258|1433E_HUMAN	355.815	17	15	454	388	263	254	383	423	0.854626	0.965779	1.10444	Oxidation (M); Carbamidomethylation	29173.9	14-3-3 protein epsilon OS=Homo sapiens OX=9606 GN=YWHAE PE=1 SV=1
1168	TRUE	P04839|CY24B_HUMAN	264.897	9	9	62	82	52	83	87	96	1.32258	1.59615	1.10345	Carbamidomethylation; Oxidation (M)	65335.9	Cytochrome b-245 heavy chain OS=Homo sapiens OX=9606 GN=CYBB PE=1 SV=2
336	FALSE	O00507|USP9Y_HUMAN	243.245	13	13	30	26	22	34	39	43	0.866667	1.54545	1.10256	Oxidation (M); Carbamidomethylation	291077	Probable ubiquitin carboxyl-terminal hydrolase FAF-Y OS=Homo sapiens OX=9606 GN=USP9Y PE=2 SV=2
1671	TRUE	Q9NT62|ATG3_HUMAN	232.73	10	10	46	43	27	39	49	54	0.934783	1.44444	1.10204	Carbamidomethylation; Oxidation (M)	35864.4	Ubiquitin-like-conjugating enzyme ATG3 OS=Homo sapiens OX=9606 GN=ATG3 PE=1 SV=1
1121	TRUE	Q15785|TOM34_HUMAN	268.723	8	8	18	17	12	7	49	54	0.944444	0.583333	1.10204	Carbamidomethylation	34559.4	Mitochondrial import receptor subunit TOM34 OS=Homo sapiens OX=9606 GN=TOMM34 PE=1 SV=2
444	TRUE	Q9UI12|VATH_HUMAN	335.77	17	17	166	146	102	103	129	142	0.879518	1.0098	1.10078	Oxidation (M); Carbamidomethylation	55883.1	V-type proton ATPase subunit H OS=Homo sapiens OX=9606 GN=ATP6V1H PE=1 SV=1
3202	TRUE	O60885|BRD4_HUMAN	155.235	6	5	11	16	1	2	10	11	1.45455	2	1.1	Oxidation (M); Carbamidomethylation	152219	Bromodomain-containing protein 4 OS=Homo sapiens OX=9606 GN=BRD4 PE=1 SV=2
2813	TRUE	P04066|FUCO_HUMAN	175.013	6	6	14	17	20	37	10	11	1.21429	1.85	1.1	Oxidation (M)	53688.9	Tissue alpha-L-fucosidase OS=Homo sapiens OX=9606 GN=FUCA1 PE=1 SV=4
3593	TRUE	Q9BUH6|PAXX_HUMAN	136.413	4	4	4	5	4	7	10	11	1.25	1.75	1.1	Carbamidomethylation	21639.5	Protein PAXX OS=Homo sapiens OX=9606 GN=PAXX PE=1 SV=2
3801	TRUE	Q9NWU1|OXSM_HUMAN	126.84	3	3	8	7	4	6	10	11	0.875	1.5	1.1		48842.9	3-oxoacyl-[acyl-carrier-protein] synthase, mitochondrial OS=Homo sapiens OX=9606 GN=OXSM PE=1 SV=1
2306	TRUE	Q92696|PGTA_HUMAN	199.5	11	11	27	34	18	25	40	44	1.25926	1.38889	1.1	Carbamidomethylation	65071.8	Geranylgeranyl transferase type-2 subunit alpha OS=Homo sapiens OX=9606 GN=RABGGTA PE=1 SV=2
338	TRUE	Q6DD88|ATLA3_HUMAN	352.818	20	20	240	237	142	168	170	187	0.9875	1.1831	1.1	Oxidation (M); Carbamidomethylation	60542	Atlastin-3 OS=Homo sapiens OX=9606 GN=ATL3 PE=1 SV=1
1994	TRUE	Q99873|ANM1_HUMAN	215.533	11	11	13	16	12	14	10	11	1.23077	1.16667	1.1	Carbamidomethylation	42461.6	Protein arginine N-methyltransferase 1 OS=Homo sapiens OX=9606 GN=PRMT1 PE=1 SV=3
1033	TRUE	Q15404|RSU1_HUMAN	275.431	12	12	110	98	119	125	100	110	0.890909	1.05042	1.1	Oxidation (M)	31540.3	Ras suppressor protein 1 OS=Homo sapiens OX=9606 GN=RSU1 PE=1 SV=3
2863	TRUE	Q9H9Q2|CSN7B_HUMAN	172.325	4	4	9	8	8	8	10	11	0.888889	1	1.1		29622	COP9 signalosome complex subunit 7b OS=Homo sapiens OX=9606 GN=COPS7B PE=1 SV=1
2252	TRUE	Q7L5Y1|ENOF1_HUMAN	202.104	5	5	21	11	19	18	10	11	0.52381	0.947368	1.1	Oxidation (M)	49786.5	Mitochondrial enolase superfamily member 1 OS=Homo sapiens OX=9606 GN=ENOSF1 PE=1 SV=1
3327	TRUE	Q96GX9|MTNB_HUMAN	148.72	4	4	11	10	8	7	10	11	0.909091	0.875	1.1	Carbamidomethylation	27125.2	Methylthioribulose-1-phosphate dehydratase OS=Homo sapiens OX=9606 GN=APIP PE=1 SV=1
2382	TRUE	Q9H910|JUPI2_HUMAN	195.537	5	5	40	41	26	22	40	44	1.025	0.846154	1.1	Carbamidomethylation; Oxidation (M)	20063.3	Jupiter microtubule associated homolog 2 OS=Homo sapiens OX=9606 GN=JPT2 PE=1 SV=1
4288	TRUE	Q9Y5L4|TIM13_HUMAN	105.171	2	2	11	11	6	5	10	11	1	0.833333	1.1	Oxidation (M)	10500	Mitochondrial import inner membrane translocase subunit Tim13 OS=Homo sapiens OX=9606 GN=TIMM13 PE=1 SV=1
2368	TRUE	Q9NRL3|STRN4_HUMAN	196.034	9	9	27	23	21	9	20	22	0.851852	0.428571	1.1	Carbamidomethylation; Oxidation (M)	80596.1	Striatin-4 OS=Homo sapiens OX=9606 GN=STRN4 PE=1 SV=2
2397	TRUE	P46778|RL21_HUMAN	194.845	5	5	117	101	61	51	61	67	0.863248	0.836066	1.09836	Oxidation (M)	18564.8	60S ribosomal protein L21 OS=Homo sapiens OX=9606 GN=RPL21 PE=1 SV=2
234	FALSE	P0DN26|PAL4F_HUMAN	157.814	3	3	136	159	189	133	112	123	1.16912	0.703704	1.09821	Carbamidomethylation; Oxidation (M)	18196.8	Peptidyl-prolyl cis-trans isomerase A-like 4F OS=Homo sapiens OX=9606 GN=PPIAL4F PE=3 SV=1
234	FALSE	F5H284|PAL4D_HUMAN	157.814	3	3	136	159	189	133	112	123	1.16912	0.703704	1.09821	Carbamidomethylation; Oxidation (M)	18166.7	Peptidyl-prolyl cis-trans isomerase A-like 4D OS=Homo sapiens OX=9606 GN=PPIAL4D PE=3 SV=1
234	FALSE	A0A075B767|PAL4H_HUMAN	157.814	3	3	136	159	189	133	112	123	1.16912	0.703704	1.09821	Carbamidomethylation; Oxidation (M)	18207.8	Peptidyl-prolyl cis-trans isomerase A-like 4H OS=Homo sapiens OX=9606 GN=PPIAL4H PE=3 SV=1
234	FALSE	A0A075B759|PAL4E_HUMAN	157.814	3	3	136	159	189	133	112	123	1.16912	0.703704	1.09821	Carbamidomethylation; Oxidation (M)	18196.8	Peptidyl-prolyl cis-trans isomerase A-like 4E OS=Homo sapiens OX=9606 GN=PPIAL4E PE=3 SV=1
234	FALSE	Q9Y536|PAL4A_HUMAN	178.24	4	4	148	162	189	133	112	123	1.09459	0.703704	1.09821	Carbamidomethylation; Oxidation (M)	18181.8	Peptidyl-prolyl cis-trans isomerase A-like 4A OS=Homo sapiens OX=9606 GN=PPIAL4A PE=2 SV=1
983	TRUE	P49756|RBM25_HUMAN	278.65	17	17	38	52	23	26	51	56	1.36842	1.13043	1.09804	Oxidation (M); Carbamidomethylation	100185	RNA-binding protein 25 OS=Homo sapiens OX=9606 GN=RBM25 PE=1 SV=3
2020	TRUE	Q8N668|COMD1_HUMAN	214.117	7	7	43	38	26	48	41	45	0.883721	1.84615	1.09756	Oxidation (M); Carbamidomethylation	21178.1	COMM domain-containing protein 1 OS=Homo sapiens OX=9606 GN=COMMD1 PE=1 SV=1
1221	FALSE	O60361|NDK8_HUMAN	215.785	6	4	61	96	104	78	113	124	1.57377	0.75	1.09735	Carbamidomethylation; Oxidation (M)	15529.1	Putative nucleoside diphosphate kinase OS=Homo sapiens OX=9606 GN=NME2P1 PE=5 SV=1
204	TRUE	P31939|PUR9_HUMAN	380.688	33	33	190	183	226	187	185	203	0.963158	0.827434	1.0973	Oxidation (M); Carbamidomethylation	64615.9	Bifunctional purine biosynthesis protein ATIC OS=Homo sapiens OX=9606 GN=ATIC PE=1 SV=3
1815	TRUE	Q9HAV0|GBB4_HUMAN	224.401	7	5	30	46	46	67	62	68	1.53333	1.45652	1.09677	Carbamidomethylation; Oxidation (M)	37567.2	Guanine nucleotide-binding protein subunit beta-4 OS=Homo sapiens OX=9606 GN=GNB4 PE=1 SV=3
330	TRUE	Q99460|PSMD1_HUMAN	354.223	28	28	165	196	162	172	186	204	1.18788	1.06173	1.09677	Oxidation (M); Carbamidomethylation	105836	26S proteasome non-ATPase regulatory subunit 1 OS=Homo sapiens OX=9606 GN=PSMD1 PE=1 SV=2
2700	TRUE	P42126|ECI1_HUMAN	180.905	5	5	24	26	13	19	21	23	1.08333	1.46154	1.09524	Oxidation (M); Carbamidomethylation	32816	Enoyl-CoA delta isomerase 1, mitochondrial OS=Homo sapiens OX=9606 GN=ECI1 PE=1 SV=1
969	TRUE	Q9BZH6|WDR11_HUMAN	279.5	19	19	44	49	33	44	63	69	1.11364	1.33333	1.09524	Carbamidomethylation; Oxidation (M)	136685	WD repeat-containing protein 11 OS=Homo sapiens OX=9606 GN=WDR11 PE=1 SV=1
1679	TRUE	Q13126|MTAP_HUMAN	232.319	10	10	47	34	41	42	42	46	0.723404	1.02439	1.09524	Carbamidomethylation; Oxidation (M)	31236	S-methyl-5'-thioadenosine phosphorylase OS=Homo sapiens OX=9606 GN=MTAP PE=1 SV=2
827	TRUE	Q12979|ABR_HUMAN	291.776	18	18	63	64	41	36	53	58	1.01587	0.878049	1.09434	Oxidation (M)	97597.8	Active breakpoint cluster region-related protein OS=Homo sapiens OX=9606 GN=ABR PE=1 SV=2
591	TRUE	P41250|GARS_HUMAN	316.893	19	19	203	173	106	86	106	116	0.852217	0.811321	1.09434	Carbamidomethylation; Oxidation (M)	83165.6	Glycine--tRNA ligase OS=Homo sapiens OX=9606 GN=GARS1 PE=1 SV=3
1476	TRUE	Q8IZP2|ST134_HUMAN	244.435	8	1	57	50	47	38	53	58	0.877193	0.808511	1.09434	Carbamidomethylation; Oxidation (M)	27406.8	Putative protein FAM10A4 OS=Homo sapiens OX=9606 GN=ST13P4 PE=5 SV=1
1526	TRUE	Q92665|RT31_HUMAN	240.634	8	8	40	38	27	24	32	35	0.95	0.888889	1.09375	Oxidation (M)	45318.5	28S ribosomal protein S31, mitochondrial OS=Homo sapiens OX=9606 GN=MRPS31 PE=1 SV=3
328	TRUE	P10253|LYAG_HUMAN	354.669	24	24	124	117	96	111	118	129	0.943548	1.15625	1.09322	Oxidation (M)	105324	Lysosomal alpha-glucosidase OS=Homo sapiens OX=9606 GN=GAA PE=1 SV=4
713	TRUE	Q14166|TTL12_HUMAN	303.061	19	19	81	72	62	48	54	59	0.888889	0.774194	1.09259	Oxidation (M); Carbamidomethylation	74403.6	Tubulin--tyrosine ligase-like protein 12 OS=Homo sapiens OX=9606 GN=TTLL12 PE=1 SV=2
1984	TRUE	P62841|RS15_HUMAN	216.049	8	8	79	65	101	62	65	71	0.822785	0.613861	1.09231	Oxidation (M)	17040.1	40S ribosomal protein S15 OS=Homo sapiens OX=9606 GN=RPS15 PE=1 SV=2
511	TRUE	Q9NY33|DPP3_HUMAN	328.377	19	19	132	127	110	110	141	154	0.962121	1	1.0922	Carbamidomethylation; Oxidation (M)	82589.2	Dipeptidyl peptidase 3 OS=Homo sapiens OX=9606 GN=DPP3 PE=1 SV=2
543	TRUE	P83111|LACTB_HUMAN	323.959	22	22	119	144	78	112	76	83	1.21008	1.4359	1.09211	Carbamidomethylation; Oxidation (M)	60693.6	Serine beta-lactamase-like protein LACTB, mitochondrial OS=Homo sapiens OX=9606 GN=LACTB PE=1 SV=2
730	TRUE	P28482|MK01_HUMAN	302.013	12	9	104	100	61	87	109	119	0.961538	1.42623	1.09174	Oxidation (M); Carbamidomethylation	41389.7	Mitogen-activated protein kinase 1 OS=Homo sapiens OX=9606 GN=MAPK1 PE=1 SV=3
7	TRUE	P60709|ACTB_HUMAN	609.979	154	2	8420	8692	11238	10825	12057	13162	1.0323	0.96325	1.09165	Oxidation (M); Carbamidomethylation	41736.7	Actin, cytoplasmic 1 OS=Homo sapiens OX=9606 GN=ACTB PE=1 SV=1
264	TRUE	P09211|GSTP1_HUMAN	367.002	19	19	216	221	289	316	284	310	1.02315	1.09343	1.09155	Carbamidomethylation; Oxidation (M)	23355.8	Glutathione S-transferase P OS=Homo sapiens OX=9606 GN=GSTP1 PE=1 SV=2
2861	TRUE	Q13568|IRF5_HUMAN	172.41	7	7	14	15	3	11	11	12	1.07143	3.66667	1.09091		56044.1	Interferon regulatory factor 5 OS=Homo sapiens OX=9606 GN=IRF5 PE=1 SV=2
2950	TRUE	O43752|STX6_HUMAN	167.433	5	5	10	11	5	18	11	12	1.1	3.6	1.09091	Oxidation (M)	29176	Syntaxin-6 OS=Homo sapiens OX=9606 GN=STX6 PE=1 SV=1
2006	TRUE	O94915|FRYL_HUMAN	214.864	12	12	17	30	6	11	11	12	1.76471	1.83333	1.09091	Carbamidomethylation	339598	Protein furry homolog-like OS=Homo sapiens OX=9606 GN=FRYL PE=1 SV=2
2435	TRUE	Q13564|ULA1_HUMAN	193.492	9	9	13	17	13	18	22	24	1.30769	1.38462	1.09091	Carbamidomethylation	60246.3	NEDD8-activating enzyme E1 regulatory subunit OS=Homo sapiens OX=9606 GN=NAE1 PE=1 SV=1
1893	TRUE	P14324|FPPS_HUMAN	220.456	8	8	18	22	12	15	33	36	1.22222	1.25	1.09091	Oxidation (M); Carbamidomethylation	48275.5	Farnesyl pyrophosphate synthase OS=Homo sapiens OX=9606 GN=FDPS PE=1 SV=4
2759	TRUE	Q9H2H8|PPIL3_HUMAN	177.976	5	5	11	9	8	10	11	12	0.818182	1.25	1.09091	Oxidation (M)	18154.5	Peptidyl-prolyl cis-trans isomerase-like 3 OS=Homo sapiens OX=9606 GN=PPIL3 PE=1 SV=1
1719	TRUE	P52294|IMA5_HUMAN	229.996	6	4	26	31	31	36	33	36	1.19231	1.16129	1.09091	Carbamidomethylation	60221.8	Importin subunit alpha-5 OS=Homo sapiens OX=9606 GN=KPNA1 PE=1 SV=3
5373	TRUE	Q9NZA1|CLIC5_HUMAN	57.3066	1	1	14	7	13	14	11	12	0.5	1.07692	1.09091	Carbamidomethylation	46502.6	Chloride intracellular channel protein 5 OS=Homo sapiens OX=9606 GN=CLIC5 PE=1 SV=3
5373	TRUE	Q96NY7|CLIC6_HUMAN	57.3066	1	1	14	7	13	14	11	12	0.5	1.07692	1.09091	Carbamidomethylation	73011.5	Chloride intracellular channel protein 6 OS=Homo sapiens OX=9606 GN=CLIC6 PE=2 SV=3
3164	TRUE	Q9BTC0|DIDO1_HUMAN	157.21	6	6	14	16	4	4	11	12	1.14286	1	1.09091		243873	Death-inducer obliterator 1 OS=Homo sapiens OX=9606 GN=DIDO1 PE=1 SV=5
3942	TRUE	Q86VP1|TAXB1_HUMAN	120.444	3	3	6	1	1	1	11	12	0.166667	1	1.09091		90877.1	Tax1-binding protein 1 OS=Homo sapiens OX=9606 GN=TAX1BP1 PE=1 SV=2
2907	TRUE	O60496|DOK2_HUMAN	170.051	6	6	7	7	12	11	11	12	1	0.916667	1.09091		45378.9	Docking protein 2 OS=Homo sapiens OX=9606 GN=DOK2 PE=1 SV=2
685	TRUE	P46063|RECQ1_HUMAN	306.256	16	16	31	51	51	36	66	72	1.64516	0.705882	1.09091	Carbamidomethylation; Oxidation (M)	73457.3	ATP-dependent DNA helicase Q1 OS=Homo sapiens OX=9606 GN=RECQL PE=1 SV=3
3294	TRUE	P62847|RS24_HUMAN	150.2	3	3	43	77	45	30	44	48	1.7907	0.666667	1.09091	Oxidation (M)	15423.2	40S ribosomal protein S24 OS=Homo sapiens OX=9606 GN=RPS24 PE=1 SV=1
4133	TRUE	Q9GZU8|PIP30_HUMAN	112.423	3	3			6	4	11	12		0.666667	1.09091		28912.2	PSME3-interacting protein OS=Homo sapiens OX=9606 GN=PSME3IP1 PE=1 SV=1
1829	TRUE	P16930|FAAA_HUMAN	223.944	9	9	31	18	26	17	33	36	0.580645	0.653846	1.09091	Carbamidomethylation; Oxidation (M)	46374.3	Fumarylacetoacetase OS=Homo sapiens OX=9606 GN=FAH PE=1 SV=2
393	FALSE	Q6P474|PDXD2_HUMAN	175.625	5	5	13	12	14	7	11	12	0.923077	0.5	1.09091	Oxidation (M); Carbamidomethylation	51810	Putative pyridoxal-dependent decarboxylase domain-containing protein 2 OS=Homo sapiens OX=9606 GN=PDXDC2P PE=5 SV=3
8	TRUE	P63261|ACTG_HUMAN	609.296	153	2	8421	8685	11230	10828	12058	13153	1.03135	0.964203	1.09081	Oxidation (M); Carbamidomethylation	41792.8	Actin, cytoplasmic 2 OS=Homo sapiens OX=9606 GN=ACTG1 PE=1 SV=1
1221	TRUE	P22392|NDKB_HUMAN	260.918	9	5	91	120	133	98	133	145	1.31868	0.736842	1.09023	Carbamidomethylation; Oxidation (M)	17298	Nucleoside diphosphate kinase B OS=Homo sapiens OX=9606 GN=NME2 PE=1 SV=1
89	TRUE	Q9Y3Z3|SAMH1_HUMAN	430.861	40	40	540	595	333	347	466	508	1.10185	1.04204	1.09013	Oxidation (M); Carbamidomethylation	72200.5	Deoxynucleoside triphosphate triphosphohydrolase SAMHD1 OS=Homo sapiens OX=9606 GN=SAMHD1 PE=1 SV=2
832	TRUE	P37837|TALDO_HUMAN	291.372	20	20	257	336	246	253	233	254	1.30739	1.02846	1.09013	Carbamidomethylation; Oxidation (M)	37540.1	Transaldolase OS=Homo sapiens OX=9606 GN=TALDO1 PE=1 SV=2
2029	TRUE	P53999|TCP4_HUMAN	213.775	9	9	54	60	48	41	56	61	1.11111	0.854167	1.08929	Oxidation (M)	14395.3	Activated RNA polymerase II transcriptional coactivator p15 OS=Homo sapiens OX=9606 GN=SUB1 PE=1 SV=3
1458	TRUE	P20936|RASA1_HUMAN	245.894	11	11	35	39	38	17	56	61	1.11429	0.447368	1.08929	Oxidation (M)	116403	Ras GTPase-activating protein 1 OS=Homo sapiens OX=9606 GN=RASA1 PE=1 SV=1
918	TRUE	A5YKK6|CNOT1_HUMAN	284.268	22	22	47	34	36	33	45	49	0.723404	0.916667	1.08889	Oxidation (M); Carbamidomethylation	266939	CCR4-NOT transcription complex subunit 1 OS=Homo sapiens OX=9606 GN=CNOT1 PE=1 SV=2
220	TRUE	O00299|CLIC1_HUMAN	377.415	17	17	270	266	271	279	262	285	0.985185	1.02952	1.08779	Carbamidomethylation	26922.7	Chloride intracellular channel protein 1 OS=Homo sapiens OX=9606 GN=CLIC1 PE=1 SV=4
454	TRUE	P13995|MTDC_HUMAN	334.544	17	17	58	63	45	62	69	75	1.08621	1.37778	1.08696	Oxidation (M)	37895.1	Bifunctional methylenetetrahydrofolate dehydrogenase/cyclohydrolase, mitochondrial OS=Homo sapiens OX=9606 GN=MTHFD2 PE=1 SV=2
1217	TRUE	Q12792|TWF1_HUMAN	261.081	12	12	36	43	38	48	46	50	1.19444	1.26316	1.08696		40282.7	Twinfilin-1 OS=Homo sapiens OX=9606 GN=TWF1 PE=1 SV=3
968	TRUE	P55036|PSMD4_HUMAN	279.604	11	11	84	110	50	59	92	100	1.30952	1.18	1.08696	Carbamidomethylation; Oxidation (M)	40736.7	26S proteasome non-ATPase regulatory subunit 4 OS=Homo sapiens OX=9606 GN=PSMD4 PE=1 SV=1
2376	TRUE	Q13405|RM49_HUMAN	195.615	6	6	25	22	16	16	23	25	0.88	1	1.08696		19198	39S ribosomal protein L49, mitochondrial OS=Homo sapiens OX=9606 GN=MRPL49 PE=1 SV=1
2770	TRUE	Q8IW45|NNRD_HUMAN	177.352	6	6	10	14	28	26	23	25	1.4	0.928571	1.08696	Carbamidomethylation	36576	ATP-dependent (S)-NAD(P)H-hydrate dehydratase OS=Homo sapiens OX=9606 GN=NAXD PE=1 SV=1
1498	TRUE	O75022|LIRB3_HUMAN	243.027	10	7	42	34	31	57	58	63	0.809524	1.83871	1.08621	Oxidation (M)	69385.9	Leukocyte immunoglobulin-like receptor subfamily B member 3 OS=Homo sapiens OX=9606 GN=LILRB3 PE=1 SV=3
938	TRUE	Q8NHL6|LIRB1_HUMAN	282.374	14	6	21	41	36	42	58	63	1.95238	1.16667	1.08621	Carbamidomethylation; Oxidation (M)	70819.4	Leukocyte immunoglobulin-like receptor subfamily B member 1 OS=Homo sapiens OX=9606 GN=LILRB1 PE=1 SV=1
247	TRUE	Q16881|TRXR1_HUMAN	369.872	23	22	196	222	220	199	152	165	1.13265	0.904545	1.08553	Carbamidomethylation; Oxidation (M)	70874.9	Thioredoxin reductase 1, cytoplasmic OS=Homo sapiens OX=9606 GN=TXNRD1 PE=1 SV=3
238	TRUE	Q01469|FABP5_HUMAN	372.487	25	11	534	530	455	398	539	585	0.992509	0.874725	1.08534	Carbamidomethylation; Oxidation (M)	15164.4	Fatty acid-binding protein 5 OS=Homo sapiens OX=9606 GN=FABP5 PE=1 SV=3
516	TRUE	P19367|HXK1_HUMAN	327.363	23	19	71	90	63	67	94	102	1.26761	1.06349	1.08511	Carbamidomethylation; Oxidation (M)	102486	Hexokinase-1 OS=Homo sapiens OX=9606 GN=HK1 PE=1 SV=3
217	TRUE	Q96QK1|VPS35_HUMAN	377.812	25	25	124	103	81	81	94	102	0.830645	1	1.08511	Carbamidomethylation; Oxidation (M)	91707	Vacuolar protein sorting-associated protein 35 OS=Homo sapiens OX=9606 GN=VPS35 PE=1 SV=2
1470	TRUE	Q13043|STK4_HUMAN	244.927	12	7	59	54	39	37	47	51	0.915254	0.948718	1.08511	Oxidation (M)	55630.2	Serine/threonine-protein kinase 4 OS=Homo sapiens OX=9606 GN=STK4 PE=1 SV=2
510	TRUE	P06753|TPM3_HUMAN	328.408	23	9	303	295	246	223	247	268	0.973597	0.906504	1.08502	Oxidation (M)	32950	Tropomyosin alpha-3 chain OS=Homo sapiens OX=9606 GN=TPM3 PE=1 SV=2
526	TRUE	Q8N2K0|ABD12_HUMAN	325.735	17	17	45	35	60	72	59	64	0.777778	1.2	1.08475	Carbamidomethylation; Oxidation (M)	45096.8	Lysophosphatidylserine lipase ABHD12 OS=Homo sapiens OX=9606 GN=ABHD12 PE=1 SV=2
3135	TRUE	Q9Y3C8|UFC1_HUMAN	158.785	4	4	9	10	8	14	12	13	1.11111	1.75	1.08333	Carbamidomethylation; Oxidation (M)	19458.4	Ubiquitin-fold modifier-conjugating enzyme 1 OS=Homo sapiens OX=9606 GN=UFC1 PE=1 SV=3
2298	TRUE	P25788|PSA3_HUMAN	199.637	8	8	28	32	12	19	24	26	1.14286	1.58333	1.08333	Oxidation (M)	28433.2	Proteasome subunit alpha type-3 OS=Homo sapiens OX=9606 GN=PSMA3 PE=1 SV=2
2862	TRUE	O43572|AKA10_HUMAN	172.354	8	8	9	13	3	4	12	13	1.44444	1.33333	1.08333	Oxidation (M); Carbamidomethylation	73818.2	A-kinase anchor protein 10, mitochondrial OS=Homo sapiens OX=9606 GN=AKAP10 PE=1 SV=2
1715	TRUE	P10114|RAP2A_HUMAN	230.318	9	3	47	42	47	58	48	52	0.893617	1.23404	1.08333	Carbamidomethylation; Oxidation (M)	20615.5	Ras-related protein Rap-2a OS=Homo sapiens OX=9606 GN=RAP2A PE=1 SV=1
2274	FALSE	Q7Z4I7|LIMS2_HUMAN	132.237	3	3	9	6	8	9	12	13	0.666667	1.125	1.08333	Carbamidomethylation	38916	LIM and senescent cell antigen-like-containing domain protein 2 OS=Homo sapiens OX=9606 GN=LIMS2 PE=1 SV=1
2185	TRUE	Q96GS4|BORC6_HUMAN	205.666	6	6	15	7	8	9	12	13	0.466667	1.125	1.08333	Carbamidomethylation	37226.3	BLOC-1-related complex subunit 6 OS=Homo sapiens OX=9606 GN=BORCS6 PE=1 SV=2
1211	FALSE	B2RXH8|HNRC2_HUMAN	170.569	5	5	39	43	9	10	24	26	1.10256	1.11111	1.08333		32072.3	Heterogeneous nuclear ribonucleoprotein C-like 2 OS=Homo sapiens OX=9606 GN=HNRNPCL2 PE=1 SV=1
1211	FALSE	P0DMR1|HNRC4_HUMAN	170.569	5	5	39	43	9	10	24	26	1.10256	1.11111	1.08333		32029.4	Heterogeneous nuclear ribonucleoprotein C-like 4 OS=Homo sapiens OX=9606 GN=HNRNPCL4 PE=3 SV=1
1211	FALSE	O60812|HNRC1_HUMAN	170.569	5	5	39	43	9	10	24	26	1.10256	1.11111	1.08333		32142.4	Heterogeneous nuclear ribonucleoprotein C-like 1 OS=Homo sapiens OX=9606 GN=HNRNPCL1 PE=1 SV=1
1211	FALSE	B7ZW38|HNRC3_HUMAN	170.569	5	5	39	43	9	10	24	26	1.10256	1.11111	1.08333		32029.4	Heterogeneous nuclear ribonucleoprotein C-like 3 OS=Homo sapiens OX=9606 GN=HNRNPCL3 PE=2 SV=1
3698	TRUE	Q86VR2|RETR3_HUMAN	131.383	3	3	6	3	9	10	12	13	0.5	1.11111	1.08333		51396.2	Reticulophagy regulator 3 OS=Homo sapiens OX=9606 GN=RETREG3 PE=1 SV=1
986	FALSE	P11388|TOP2A_HUMAN	133.444	5	5	6	10	6	6	12	13	1.66667	1	1.08333		174385	DNA topoisomerase 2-alpha OS=Homo sapiens OX=9606 GN=TOP2A PE=1 SV=3
2455	TRUE	Q9UQ88|CD11A_HUMAN	192.411	6	1	14	9	8	8	12	13	0.642857	1	1.08333	Carbamidomethylation	91361.6	Cyclin-dependent kinase 11A OS=Homo sapiens OX=9606 GN=CDK11A PE=1 SV=4
423	TRUE	Q9H223|EHD4_HUMAN	337.837	23	20	155	161	140	134	180	195	1.03871	0.957143	1.08333	Oxidation (M); Carbamidomethylation	61175.1	EH domain-containing protein 4 OS=Homo sapiens OX=9606 GN=EHD4 PE=1 SV=1
2603	TRUE	Q9GZP4|PITH1_HUMAN	184.878	3	3	25	21	23	22	36	39	0.84	0.956522	1.08333	Oxidation (M)	24177.8	PITH domain-containing protein 1 OS=Homo sapiens OX=9606 GN=PITHD1 PE=1 SV=1
2121	TRUE	Q9H4X1|RGCC_HUMAN	208.696	4	4	35	31	32	30	48	52	0.885714	0.9375	1.08333		14559	Regulator of cell cycle RGCC OS=Homo sapiens OX=9606 GN=RGCC PE=1 SV=1
2285	TRUE	P43155|CACP_HUMAN	200.371	8	8	20	19	9	8	12	13	0.95	0.888889	1.08333	Oxidation (M)	70857.6	Carnitine O-acetyltransferase OS=Homo sapiens OX=9606 GN=CRAT PE=1 SV=5
3646	TRUE	P38432|COIL_HUMAN	133.531	2	2	13	13	9	7	12	13	1	0.777778	1.08333		62608.3	Coilin OS=Homo sapiens OX=9606 GN=COIL PE=1 SV=1
3062	TRUE	Q9NRR5|UBQL4_HUMAN	161.932	7	3	7	11	11	8	12	13	1.57143	0.727273	1.08333	Carbamidomethylation; Oxidation (M)	63852.9	Ubiquilin-4 OS=Homo sapiens OX=9606 GN=UBQLN4 PE=1 SV=2
2061	TRUE	Q9H2J4|PDCL3_HUMAN	212.094	6	6	4	8	38	27	24	26	2	0.710526	1.08333	Oxidation (M)	27614.4	Phosducin-like protein 3 OS=Homo sapiens OX=9606 GN=PDCL3 PE=1 SV=1
2282	TRUE	O95757|HS74L_HUMAN	200.475	5	1	47	48	34	24	36	39	1.02128	0.705882	1.08333	Carbamidomethylation; Oxidation (M)	94512.5	Heat shock 70 kDa protein 4L OS=Homo sapiens OX=9606 GN=HSPA4L PE=1 SV=3
855	TRUE	O60486|PLXC1_HUMAN	289.8	21	21	65	59	84	57	24	26	0.907692	0.678571	1.08333	Oxidation (M); Carbamidomethylation	175742	Plexin-C1 OS=Homo sapiens OX=9606 GN=PLXNC1 PE=1 SV=1
2097	TRUE	Q6PI48|SYDM_HUMAN	210.45	9	9	25	29	21	14	24	26	1.16	0.666667	1.08333	Carbamidomethylation; Oxidation (M)	73562.7	Aspartate--tRNA ligase, mitochondrial OS=Homo sapiens OX=9606 GN=DARS2 PE=1 SV=1
3819	TRUE	O43402|EMC8_HUMAN	126.046	3	3	10	14	15	8	12	13	1.4	0.533333	1.08333	Carbamidomethylation	23773	ER membrane protein complex subunit 8 OS=Homo sapiens OX=9606 GN=EMC8 PE=1 SV=1
383	TRUE	Q13409|DC1I2_HUMAN	345.009	20	20	97	108	111	113	170	184	1.1134	1.01802	1.08235	Carbamidomethylation; Oxidation (M)	71456.6	Cytoplasmic dynein 1 intermediate chain 2 OS=Homo sapiens OX=9606 GN=DYNC1I2 PE=1 SV=3
549	TRUE	O14579|COPE_HUMAN	323.153	17	17	92	69	98	102	99	107	0.75	1.04082	1.08081	Carbamidomethylation; Oxidation (M)	34482	Coatomer subunit epsilon OS=Homo sapiens OX=9606 GN=COPE PE=1 SV=3
948	TRUE	Q8NHP6|MSPD2_HUMAN	281.771	17	17	59	59	18	45	62	67	1	2.5	1.08065	Oxidation (M); Carbamidomethylation	59746.2	Motile sperm domain-containing protein 2 OS=Homo sapiens OX=9606 GN=MOSPD2 PE=1 SV=1
90	TRUE	P52209|6PGD_HUMAN	429.891	35	35	806	798	599	660	770	832	0.990074	1.10184	1.08052	Carbamidomethylation; Oxidation (M)	53140	6-phosphogluconate dehydrogenase, decarboxylating OS=Homo sapiens OX=9606 GN=PGD PE=1 SV=3
1947	TRUE	Q8IZH2|XRN1_HUMAN	217.914	12	12	33	37	9	17	25	27	1.12121	1.88889	1.08		194107	5'-3' exoribonuclease 1 OS=Homo sapiens OX=9606 GN=XRN1 PE=1 SV=1
1922	TRUE	Q6P1N0|C2D1A_HUMAN	219.158	10	10	33	26	23	31	25	27	0.787879	1.34783	1.08		104062	Coiled-coil and C2 domain-containing protein 1A OS=Homo sapiens OX=9606 GN=CC2D1A PE=1 SV=1
326	TRUE	Q8IUE6|H2A2B_HUMAN	355.28	24	1	505	536	362	367	250	270	1.06139	1.01381	1.08		13995.3	Histone H2A type 2-B OS=Homo sapiens OX=9606 GN=H2AC21 PE=1 SV=3
1945	TRUE	Q99598|TSNAX_HUMAN	217.972	8	8	17	30	15	13	25	27	1.76471	0.866667	1.08	Oxidation (M)	33112.5	Translin-associated protein X OS=Homo sapiens OX=9606 GN=TSNAX PE=1 SV=1
2279	TRUE	O00244|ATOX1_HUMAN	200.585	5	5	54	41	56	30	50	54	0.759259	0.535714	1.08	Oxidation (M); Carbamidomethylation	7401.62	Copper transport protein ATOX1 OS=Homo sapiens OX=9606 GN=ATOX1 PE=1 SV=1
1627	TRUE	Q9Y3L5|RAP2C_HUMAN	235.019	10	4	58	60	60	70	63	68	1.03448	1.16667	1.07937	Carbamidomethylation; Oxidation (M)	20744.8	Ras-related protein Rap-2c OS=Homo sapiens OX=9606 GN=RAP2C PE=1 SV=1
1854	TRUE	Q01970|PLCB3_HUMAN	222.736	12	12	32	47	13	16	38	41	1.46875	1.23077	1.07895	Carbamidomethylation; Oxidation (M)	138799	1-phosphatidylinositol 4,5-bisphosphate phosphodiesterase beta-3 OS=Homo sapiens OX=9606 GN=PLCB3 PE=1 SV=2
1323	TRUE	Q14155|ARHG7_HUMAN	254.23	11	8	31	28	42	48	38	41	0.903226	1.14286	1.07895	Carbamidomethylation	90012.1	Rho guanine nucleotide exchange factor 7 OS=Homo sapiens OX=9606 GN=ARHGEF7 PE=1 SV=2
975	TRUE	P50502|F10A1_HUMAN	279.134	12	5	85	97	96	72	102	110	1.14118	0.75	1.07843	Carbamidomethylation; Oxidation (M)	41331.7	Hsc70-interacting protein OS=Homo sapiens OX=9606 GN=ST13 PE=1 SV=2
1130	TRUE	P0DMM9|ST1A3_HUMAN	268.41	10	6	28	21	58	108	65	70	0.75	1.86207	1.07692	Oxidation (M); Carbamidomethylation	34196.2	Sulfotransferase 1A3 OS=Homo sapiens OX=9606 GN=SULT1A3 PE=1 SV=1
1130	TRUE	P0DMN0|ST1A4_HUMAN	268.41	10	6	28	21	58	108	65	70	0.75	1.86207	1.07692	Oxidation (M); Carbamidomethylation	34196.2	Sulfotransferase 1A4 OS=Homo sapiens OX=9606 GN=SULT1A4 PE=1 SV=1
3310	TRUE	Q15843|NEDD8_HUMAN	149.594	4	4	21	20	16	20	13	14	0.952381	1.25	1.07692		9071.55	NEDD8 OS=Homo sapiens OX=9606 GN=NEDD8 PE=1 SV=1
3124	TRUE	P82930|RT34_HUMAN	159.096	3	3	32	27	21	22	26	28	0.84375	1.04762	1.07692	Oxidation (M)	25650.5	28S ribosomal protein S34, mitochondrial OS=Homo sapiens OX=9606 GN=MRPS34 PE=1 SV=2
214	TRUE	Q07954|LRP1_HUMAN	378.393	48	48	152	101	154	141	182	196	0.664474	0.915584	1.07692	Carbamidomethylation; Oxidation (M)	504606	Prolow-density lipoprotein receptor-related protein 1 OS=Homo sapiens OX=9606 GN=LRP1 PE=1 SV=2
954	TRUE	P46060|RAGP1_HUMAN	280.647	16	16	48	47	45	34	52	56	0.979167	0.755556	1.07692	Oxidation (M); Carbamidomethylation	63541.9	Ran GTPase-activating protein 1 OS=Homo sapiens OX=9606 GN=RANGAP1 PE=1 SV=1
1591	FALSE	P05129|KPCG_HUMAN	122.91	2	1	22	25	22	14	13	14	1.13636	0.636364	1.07692	Oxidation (M); Carbamidomethylation	78447.8	Protein kinase C gamma type OS=Homo sapiens OX=9606 GN=PRKCG PE=1 SV=3
656	TRUE	O00231|PSD11_HUMAN	309.663	19	19	119	115	110	126	144	155	0.966387	1.14545	1.07639	Oxidation (M); Carbamidomethylation	47463.8	26S proteasome non-ATPase regulatory subunit 11 OS=Homo sapiens OX=9606 GN=PSMD11 PE=1 SV=3
1980	TRUE	Q9NXG2|THUM1_HUMAN	216.226	7	7	14	28	14	15	27	29	2	1.07143	1.07407	Oxidation (M)	39315.4	THUMP domain-containing protein 1 OS=Homo sapiens OX=9606 GN=THUMPD1 PE=1 SV=2
1969	TRUE	Q9BZJ0|CRNL1_HUMAN	216.717	8	8	13	16	7	7	27	29	1.23077	1	1.07407	Carbamidomethylation	100452	Crooked neck-like protein 1 OS=Homo sapiens OX=9606 GN=CRNKL1 PE=1 SV=4
1811	TRUE	O75131|CPNE3_HUMAN	224.603	9	9	31	30	20	20	27	29	0.967742	1	1.07407	Carbamidomethylation; Oxidation (M)	60130.6	Copine-3 OS=Homo sapiens OX=9606 GN=CPNE3 PE=1 SV=1
5	FALSE	P35749|MYH11_HUMAN	297.291	11	4	230	205	133	129	135	145	0.891304	0.969925	1.07407	Carbamidomethylation; Oxidation (M)	227339	Myosin-11 OS=Homo sapiens OX=9606 GN=MYH11 PE=1 SV=3
1140	TRUE	P13284|GILT_HUMAN	267.573	9	9	43	73	54	70	109	117	1.69767	1.2963	1.07339	Oxidation (M); Carbamidomethylation	27963.6	Gamma-interferon-inducible lysosomal thiol reductase OS=Homo sapiens OX=9606 GN=IFI30 PE=1 SV=3
913	TRUE	Q6ZUJ8|BCAP_HUMAN	284.801	16	16	49	52	52	57	41	44	1.06122	1.09615	1.07317	Carbamidomethylation; Oxidation (M)	90397.8	Phosphoinositide 3-kinase adapter protein 1 OS=Homo sapiens OX=9606 GN=PIK3AP1 PE=1 SV=2
710	TRUE	Q9H4G4|GAPR1_HUMAN	303.451	12	12	133	201	231	233	164	176	1.51128	1.00866	1.07317	Carbamidomethylation; Oxidation (M)	17218.3	Golgi-associated plant pathogenesis-related protein 1 OS=Homo sapiens OX=9606 GN=GLIPR2 PE=1 SV=3
1153	TRUE	Q9Y4P3|TBL2_HUMAN	266.341	12	12	34	41	32	29	41	44	1.20588	0.90625	1.07317	Oxidation (M); Carbamidomethylation	49797.8	Transducin beta-like protein 2 OS=Homo sapiens OX=9606 GN=TBL2 PE=1 SV=1
1381	TRUE	P21912|SDHB_HUMAN	250.804	14	14	79	94	24	72	55	59	1.18987	3	1.07273	Oxidation (M); Carbamidomethylation	31629.7	Succinate dehydrogenase [ubiquinone] iron-sulfur subunit, mitochondrial OS=Homo sapiens OX=9606 GN=SDHB PE=1 SV=3
1166	TRUE	P00813|ADA_HUMAN	265.268	13	13	50	41	41	65	55	59	0.82	1.58537	1.07273	Oxidation (M)	40764.4	Adenosine deaminase OS=Homo sapiens OX=9606 GN=ADA PE=1 SV=3
1089	TRUE	Q01813|PFKAP_HUMAN	271.011	14	12	50	53	57	59	55	59	1.06	1.03509	1.07273	Oxidation (M); Carbamidomethylation	85596.1	ATP-dependent 6-phosphofructokinase, platelet type OS=Homo sapiens OX=9606 GN=PFKP PE=1 SV=2
2002	TRUE	Q96CN9|GCC1_HUMAN	215.133	10	10	44	43	5	14	28	30	0.977273	2.8	1.07143	Carbamidomethylation; Oxidation (M)	87810.7	GRIP and coiled-coil domain-containing protein 1 OS=Homo sapiens OX=9606 GN=GCC1 PE=1 SV=1
3072	TRUE	Q8NHP8|PLBL2_HUMAN	161.676	6	6	15	4	15	22	14	15	0.266667	1.46667	1.07143	Carbamidomethylation; Oxidation (M)	65471.8	Putative phospholipase B-like 2 OS=Homo sapiens OX=9606 GN=PLBD2 PE=1 SV=2
3620	TRUE	O00757|F16P2_HUMAN	135.088	3	2	44	42	21	29	28	30	0.954545	1.38095	1.07143	Oxidation (M)	36743.2	Fructose-1,6-bisphosphatase isozyme 2 OS=Homo sapiens OX=9606 GN=FBP2 PE=1 SV=2
2839	TRUE	Q4G0F5|VP26B_HUMAN	173.223	5	5	17	18	19	26	14	15	1.05882	1.36842	1.07143	Carbamidomethylation	39154.7	Vacuolar protein sorting-associated protein 26B OS=Homo sapiens OX=9606 GN=VPS26B PE=1 SV=2
1556	TRUE	Q15811|ITSN1_HUMAN	238.988	14	13	11	12	3	4	28	30	1.09091	1.33333	1.07143	Oxidation (M)	195422	Intersectin-1 OS=Homo sapiens OX=9606 GN=ITSN1 PE=1 SV=3
728	TRUE	O95782|AP2A1_HUMAN	302.141	23	19	83	90	72	81	98	105	1.08434	1.125	1.07143	Carbamidomethylation; Oxidation (M)	107546	AP-2 complex subunit alpha-1 OS=Homo sapiens OX=9606 GN=AP2A1 PE=1 SV=3
112	TRUE	P09960|LKHA4_HUMAN	414.789	30	30	251	292	230	246	238	255	1.16335	1.06957	1.07143	Carbamidomethylation; Oxidation (M)	69285.3	Leukotriene A-4 hydrolase OS=Homo sapiens OX=9606 GN=LTA4H PE=1 SV=2
2456	TRUE	Q99417|MYCBP_HUMAN	192.374	6	6	31	28	32	33	28	30	0.903226	1.03125	1.07143	Oxidation (M)	11966.7	c-Myc-binding protein OS=Homo sapiens OX=9606 GN=MYCBP PE=1 SV=3
2497	TRUE	Q92526|TCPW_HUMAN	190.559	7	2	10	10	12	12	14	15	1	1	1.07143	Carbamidomethylation	57821.4	T-complex protein 1 subunit zeta-2 OS=Homo sapiens OX=9606 GN=CCT6B PE=1 SV=5
2076	TRUE	P61604|CH10_HUMAN	211.332	8	8	67	64	37	34	42	45	0.955224	0.918919	1.07143		10931.7	10 kDa heat shock protein, mitochondrial OS=Homo sapiens OX=9606 GN=HSPE1 PE=1 SV=2
1625	TRUE	Q16401|PSMD5_HUMAN	235.091	10	10	40	29	38	32	42	45	0.725	0.842105	1.07143	Oxidation (M)	56195.7	26S proteasome non-ATPase regulatory subunit 5 OS=Homo sapiens OX=9606 GN=PSMD5 PE=1 SV=3
2089	FALSE	P60763|RAC3_HUMAN	160.056	3	1	20	15	14	11	14	15	0.75	0.785714	1.07143	Carbamidomethylation	21378.9	Ras-related C3 botulinum toxin substrate 3 OS=Homo sapiens OX=9606 GN=RAC3 PE=1 SV=1
1295	TRUE	P43034|LIS1_HUMAN	255.894	9	9	44	45	39	30	42	45	1.02273	0.769231	1.07143		46638	Platelet-activating factor acetylhydrolase IB subunit alpha OS=Homo sapiens OX=9606 GN=PAFAH1B1 PE=1 SV=2
403	TRUE	P17980|PRS6A_HUMAN	341.384	21	21	222	250	176	152	225	241	1.12613	0.863636	1.07111	Oxidation (M)	49203.5	26S proteasome regulatory subunit 6A OS=Homo sapiens OX=9606 GN=PSMC3 PE=1 SV=3
325	TRUE	O75165|DJC13_HUMAN	355.453	39	39	103	111	86	76	113	121	1.07767	0.883721	1.0708	Oxidation (M); Carbamidomethylation	254415	DnaJ homolog subfamily C member 13 OS=Homo sapiens OX=9606 GN=DNAJC13 PE=1 SV=5
553	TRUE	P13804|ETFA_HUMAN	322.803	16	16	192	194	93	124	143	153	1.01042	1.33333	1.06993	Oxidation (M); Carbamidomethylation	35079.6	Electron transfer flavoprotein subunit alpha, mitochondrial OS=Homo sapiens OX=9606 GN=ETFA PE=1 SV=1
2531	TRUE	P13473|LAMP2_HUMAN	188.463	5	5	53	59	49	38	43	46	1.11321	0.77551	1.06977		44960.7	Lysosome-associated membrane glycoprotein 2 OS=Homo sapiens OX=9606 GN=LAMP2 PE=1 SV=2
111	TRUE	P46939|UTRO_HUMAN	414.791	77	77	213	244	122	189	188	201	1.14554	1.54918	1.06915	Oxidation (M); Carbamidomethylation	394466	Utrophin OS=Homo sapiens OX=9606 GN=UTRN PE=1 SV=2
1616	TRUE	P34910|EVI2B_HUMAN	235.498	7	7	91	79	44	52	89	95	0.868132	1.18182	1.06742	Oxidation (M); Carbamidomethylation	48666.2	Protein EVI2B OS=Homo sapiens OX=9606 GN=EVI2B PE=1 SV=2
2932	TRUE	Q9H9C1|SPE39_HUMAN	168.232	5	5	11	10	10	21	15	16	0.909091	2.1	1.06667		57005.3	Spermatogenesis-defective protein 39 homolog OS=Homo sapiens OX=9606 GN=VIPAS39 PE=1 SV=1
1942	TRUE	P06454|PTMA_HUMAN	218.174	5	5	11	16	28	35	30	32	1.45455	1.25	1.06667		12203	Prothymosin alpha OS=Homo sapiens OX=9606 GN=PTMA PE=1 SV=2
1615	TRUE	Q9HCN8|SDF2L_HUMAN	235.571	6	6	87	63	39	26	30	32	0.724138	0.666667	1.06667	Oxidation (M); Carbamidomethylation	23598.3	Stromal cell-derived factor 2-like protein 1 OS=Homo sapiens OX=9606 GN=SDF2L1 PE=1 SV=2
1951	TRUE	Q9NSC5|HOME3_HUMAN	217.612	7	7	25	17	33	12	15	16	0.68	0.363636	1.06667		39836.3	Homer protein homolog 3 OS=Homo sapiens OX=9606 GN=HOMER3 PE=1 SV=2
216	TRUE	Q13200|PSMD2_HUMAN	377.864	32	32	135	132	124	126	106	113	0.977778	1.01613	1.06604	Oxidation (M); Carbamidomethylation	100200	26S proteasome non-ATPase regulatory subunit 2 OS=Homo sapiens OX=9606 GN=PSMD2 PE=1 SV=3
1508	TRUE	P46976|GLYG_HUMAN	242.323	9	9	36	36	48	59	61	65	1	1.22917	1.06557	Oxidation (M); Carbamidomethylation	39383.8	Glycogenin-1 OS=Homo sapiens OX=9606 GN=GYG1 PE=1 SV=4
234	FALSE	A0A0B4J2A2|PAL4C_HUMAN	189.447	5	5	143	178	200	140	123	131	1.24476	0.7	1.06504	Carbamidomethylation; Oxidation (M)	18155.8	Peptidyl-prolyl cis-trans isomerase A-like 4C OS=Homo sapiens OX=9606 GN=PPIAL4C PE=2 SV=1
416	TRUE	P28331|NDUS1_HUMAN	338.807	24	24	187	215	78	124	124	132	1.14973	1.58974	1.06452	Oxidation (M); Carbamidomethylation	79467.5	NADH-ubiquinone oxidoreductase 75 kDa subunit, mitochondrial OS=Homo sapiens OX=9606 GN=NDUFS1 PE=1 SV=3
1039	TRUE	P04632|CPNS1_HUMAN	274.499	9	9	59	55	78	67	93	99	0.932203	0.858974	1.06452	Oxidation (M); Carbamidomethylation	28315.7	Calpain small subunit 1 OS=Homo sapiens OX=9606 GN=CAPNS1 PE=1 SV=1
473	TRUE	P47755|CAZA2_HUMAN	332.284	14	11	200	197	176	150	174	185	0.985	0.852273	1.06322	Carbamidomethylation; Oxidation (M)	32949.1	F-actin-capping protein subunit alpha-2 OS=Homo sapiens OX=9606 GN=CAPZA2 PE=1 SV=3
1179	TRUE	P36551|HEM6_HUMAN	264.074	15	15	45	42	14	21	32	34	0.933333	1.5	1.0625	Carbamidomethylation; Oxidation (M)	50151.9	Oxygen-dependent coproporphyrinogen-III oxidase, mitochondrial OS=Homo sapiens OX=9606 GN=CPOX PE=1 SV=3
1280	TRUE	P05026|AT1B1_HUMAN	256.564	9	9	76	97	54	54	48	51	1.27632	1	1.0625	Oxidation (M); Carbamidomethylation	35061.3	Sodium/potassium-transporting ATPase subunit beta-1 OS=Homo sapiens OX=9606 GN=ATP1B1 PE=1 SV=1
1798	TRUE	Q5VW32|BROX_HUMAN	225.47	8	8	16	15	14	12	16	17	0.9375	0.857143	1.0625	Carbamidomethylation; Oxidation (M)	46476.1	BRO1 domain-containing protein BROX OS=Homo sapiens OX=9606 GN=BROX PE=1 SV=1
2091	TRUE	P60891|PRPS1_HUMAN	210.586	10	2	14	11	25	8	16	17	0.785714	0.32	1.0625	Carbamidomethylation	34834.2	Ribose-phosphate pyrophosphokinase 1 OS=Homo sapiens OX=9606 GN=PRPS1 PE=1 SV=2
1333	TRUE	Q16836|HCDH_HUMAN	253.625	7	7	144	130	65	89	113	120	0.902778	1.36923	1.06195	Oxidation (M)	34293.5	Hydroxyacyl-coenzyme A dehydrogenase, mitochondrial OS=Homo sapiens OX=9606 GN=HADH PE=1 SV=3
1197	TRUE	Q9UPY3|DICER_HUMAN	262.612	14	14	28	39	14	18	33	35	1.39286	1.28571	1.06061	Oxidation (M); Carbamidomethylation	218682	Endoribonuclease Dicer OS=Homo sapiens OX=9606 GN=DICER1 PE=1 SV=3
124	TRUE	Q14203|DCTN1_HUMAN	408.016	46	46	201	177	247	223	233	247	0.880597	0.902834	1.06009	Carbamidomethylation; Oxidation (M)	141695	Dynactin subunit 1 OS=Homo sapiens OX=9606 GN=DCTN1 PE=1 SV=3
602	TRUE	P18583|SON_HUMAN	316.246	22	22	52	47	51	47	50	53	0.903846	0.921569	1.06	Carbamidomethylation; Oxidation (M)	263830	Protein SON OS=Homo sapiens OX=9606 GN=SON PE=1 SV=4
661	TRUE	Q09028|RBBP4_HUMAN	309.507	18	14	81	80	83	77	67	71	0.987654	0.927711	1.0597	Carbamidomethylation; Oxidation (M)	47655.7	Histone-binding protein RBBP4 OS=Homo sapiens OX=9606 GN=RBBP4 PE=1 SV=3
181	TRUE	Q10567|AP1B1_HUMAN	386.643	35	22	165	195	153	167	220	233	1.18182	1.0915	1.05909	Carbamidomethylation; Oxidation (M)	104637	AP-1 complex subunit beta-1 OS=Homo sapiens OX=9606 GN=AP1B1 PE=1 SV=2
1349	TRUE	Q92688|AN32B_HUMAN	252.665	8	6	17	17	22	28	34	36	1	1.27273	1.05882	Oxidation (M); Carbamidomethylation	28787.7	Acidic leucine-rich nuclear phosphoprotein 32 family member B OS=Homo sapiens OX=9606 GN=ANP32B PE=1 SV=1
2058	TRUE	P60033|CD81_HUMAN	212.181	4	4	98	89	48	59	102	108	0.908163	1.22917	1.05882	Carbamidomethylation	25809.4	CD81 antigen OS=Homo sapiens OX=9606 GN=CD81 PE=1 SV=1
599	TRUE	Q8N8A2|ANR44_HUMAN	316.53	26	26	42	55	52	60	68	72	1.30952	1.15385	1.05882	Carbamidomethylation; Oxidation (M)	107603	Serine/threonine-protein phosphatase 6 regulatory ankyrin repeat subunit B OS=Homo sapiens OX=9606 GN=ANKRD44 PE=1 SV=3
1021	TRUE	O94874|UFL1_HUMAN	276.062	18	18	61	66	30	34	51	54	1.08197	1.13333	1.05882	Carbamidomethylation	89595.3	E3 UFM1-protein ligase 1 OS=Homo sapiens OX=9606 GN=UFL1 PE=1 SV=2
968	FALSE	A2A3N6|PIPSL_HUMAN	174.179	3	3	54	72	29	32	51	54	1.33333	1.10345	1.05882		95047.6	Putative PIP5K1A and PSMD4-like protein OS=Homo sapiens OX=9606 GN=PIPSL PE=5 SV=1
432	TRUE	Q9BTU6|P4K2A_HUMAN	337.172	22	22	195	182	162	172	170	180	0.933333	1.06173	1.05882	Oxidation (M); Carbamidomethylation	54022.4	Phosphatidylinositol 4-kinase type 2-alpha OS=Homo sapiens OX=9606 GN=PI4K2A PE=1 SV=1
1692	TRUE	Q04760|LGUL_HUMAN	231.652	6	6	97	84	98	54	85	90	0.865979	0.55102	1.05882	Carbamidomethylation; Oxidation (M)	20777.7	Lactoylglutathione lyase OS=Homo sapiens OX=9606 GN=GLO1 PE=1 SV=4
1118	TRUE	Q9NRV9|HEBP1_HUMAN	268.957	10	10	133	121	120	131	138	146	0.909774	1.09167	1.05797	Carbamidomethylation; Oxidation (M)	21097	Heme-binding protein 1 OS=Homo sapiens OX=9606 GN=HEBP1 PE=1 SV=1
1133	TRUE	P31153|METK2_HUMAN	268.209	9	9	53	54	80	63	69	73	1.01887	0.7875	1.05797	Carbamidomethylation; Oxidation (M)	43660.7	S-adenosylmethionine synthase isoform type-2 OS=Homo sapiens OX=9606 GN=MAT2A PE=1 SV=1
2028	TRUE	Q8TC12|RDH11_HUMAN	213.929	9	9	48	41	25	52	52	55	0.854167	2.08	1.05769	Carbamidomethylation; Oxidation (M)	35386.2	Retinol dehydrogenase 11 OS=Homo sapiens OX=9606 GN=RDH11 PE=1 SV=2
406	TRUE	P42566|EPS15_HUMAN	340.371	29	29	126	110	79	85	87	92	0.873016	1.07595	1.05747	Oxidation (M); Carbamidomethylation	98655.7	Epidermal growth factor receptor substrate 15 OS=Homo sapiens OX=9606 GN=EPS15 PE=1 SV=2
1299	TRUE	P31942|HNRH3_HUMAN	255.584	8	8	53	59	55	71	88	93	1.11321	1.29091	1.05682	Oxidation (M)	36926.5	Heterogeneous nuclear ribonucleoprotein H3 OS=Homo sapiens OX=9606 GN=HNRNPH3 PE=1 SV=2
769	TRUE	O43396|TXNL1_HUMAN	298.502	13	13	59	63	93	85	88	93	1.0678	0.913978	1.05682	Carbamidomethylation; Oxidation (M)	32251.3	Thioredoxin-like protein 1 OS=Homo sapiens OX=9606 GN=TXNL1 PE=1 SV=3
2312	TRUE	O95372|LYPA2_HUMAN	198.958	7	7	29	21	23	13	53	56	0.724138	0.565217	1.0566	Carbamidomethylation; Oxidation (M)	24737	Acyl-protein thioesterase 2 OS=Homo sapiens OX=9606 GN=LYPLA2 PE=1 SV=1
212	TRUE	Q06830|PRDX1_HUMAN	378.802	24	21	534	583	394	392	320	338	1.09176	0.994924	1.05625	Oxidation (M); Carbamidomethylation	22110.4	Peroxiredoxin-1 OS=Homo sapiens OX=9606 GN=PRDX1 PE=1 SV=1
1048	TRUE	Q96A49|SYAP1_HUMAN	273.878	11	11	53	43	54	64	54	57	0.811321	1.18519	1.05556	Oxidation (M); Carbamidomethylation	39933.4	Synapse-associated protein 1 OS=Homo sapiens OX=9606 GN=SYAP1 PE=1 SV=1
3329	TRUE	Q9UKJ3|GPTC8_HUMAN	148.64	3	3	16	20	10	11	18	19	1.25	1.1	1.05556		164197	G patch domain-containing protein 8 OS=Homo sapiens OX=9606 GN=GPATCH8 PE=1 SV=2
1495	TRUE	P27986|P85A_HUMAN	243.193	13	12	41	24	32	35	36	38	0.585366	1.09375	1.05556	Carbamidomethylation; Oxidation (M)	83598.4	Phosphatidylinositol 3-kinase regulatory subunit alpha OS=Homo sapiens OX=9606 GN=PIK3R1 PE=1 SV=2
1175	FALSE	Q14410|GLPK2_HUMAN	146.769	3	3	7	20	11	10	18	19	2.85714	0.909091	1.05556	Oxidation (M)	60593.8	Glycerol kinase 2 OS=Homo sapiens OX=9606 GN=GK2 PE=2 SV=2
2263	TRUE	Q5W0V3|F16B1_HUMAN	201.72	7	7	8	18	12	8	18	19	2.25	0.666667	1.05556	Carbamidomethylation	86558.3	Protein FAM160B1 OS=Homo sapiens OX=9606 GN=FAM160B1 PE=1 SV=1
5717	TRUE	Q01638|ILRL1_HUMAN	41.4005	1	1	11	12	12		18	19	1.09091	0.0833333	1.05556		63357.9	Interleukin-1 receptor-like 1 OS=Homo sapiens OX=9606 GN=IL1RL1 PE=1 SV=4
551	TRUE	Q05655|KPCD_HUMAN	323.034	18	18	107	117	83	71	91	96	1.09346	0.855422	1.05495	Carbamidomethylation; Oxidation (M)	77505	Protein kinase C delta type OS=Homo sapiens OX=9606 GN=PRKCD PE=1 SV=2
1096	TRUE	O15294|OGT1_HUMAN	270.608	17	17	26	32	40	31	55	58	1.23077	0.775	1.05455	Carbamidomethylation; Oxidation (M)	116925	UDP-N-acetylglucosamine--peptide N-acetylglucosaminyltransferase 110 kDa subunit OS=Homo sapiens OX=9606 GN=OGT PE=1 SV=3
429	TRUE	Q16777|H2A2C_HUMAN	337.405	22	4	554	572	423	397	294	310	1.03249	0.938534	1.05442	Oxidation (M)	13988.4	Histone H2A type 2-C OS=Homo sapiens OX=9606 GN=H2AC20 PE=1 SV=4
429	TRUE	Q6FI13|H2A2A_HUMAN	337.405	22	4	554	572	423	397	294	310	1.03249	0.938534	1.05442	Oxidation (M)	14095.5	Histone H2A type 2-A OS=Homo sapiens OX=9606 GN=H2AC18 PE=1 SV=3
1931	TRUE	Q9BWU0|NADAP_HUMAN	218.949	10	10	38	37	22	9	37	39	0.973684	0.409091	1.05405	Carbamidomethylation; Oxidation (M)	88814.1	Kanadaptin OS=Homo sapiens OX=9606 GN=SLC4A1AP PE=1 SV=1
2179	TRUE	Q9P0V9|SEP10_HUMAN	205.961	8	7	13	19	3	5	19	20	1.46154	1.66667	1.05263	Carbamidomethylation; Oxidation (M)	52593	Septin-10 OS=Homo sapiens OX=9606 GN=SEPTIN10 PE=1 SV=2
2188	TRUE	O00400|ACATN_HUMAN	205.545	5	5	24	21	13	17	19	20	0.875	1.30769	1.05263	Oxidation (M)	60909	Acetyl-coenzyme A transporter 1 OS=Homo sapiens OX=9606 GN=SLC33A1 PE=1 SV=1
2518	TRUE	Q9UPT8|ZC3H4_HUMAN	189.189	6	6	12	19	13	16	19	20	1.58333	1.23077	1.05263	Oxidation (M)	140257	Zinc finger CCCH domain-containing protein 4 OS=Homo sapiens OX=9606 GN=ZC3H4 PE=1 SV=3
1215	TRUE	P58546|MTPN_HUMAN	261.378	6	6	66	108	68	71	57	60	1.63636	1.04412	1.05263	Carbamidomethylation	12894.8	Myotrophin OS=Homo sapiens OX=9606 GN=MTPN PE=1 SV=2
2466	TRUE	Q15056|IF4H_HUMAN	191.88	5	5	37	42	33	32	38	40	1.13514	0.969697	1.05263	Carbamidomethylation	27385.1	Eukaryotic translation initiation factor 4H OS=Homo sapiens OX=9606 GN=EIF4H PE=1 SV=5
1520	TRUE	Q96DB5|RMD1_HUMAN	241.369	9	9	112	105	47	40	38	40	0.9375	0.851064	1.05263	Oxidation (M); Carbamidomethylation	35808	Regulator of microtubule dynamics protein 1 OS=Homo sapiens OX=9606 GN=RMDN1 PE=1 SV=1
2388	TRUE	P22087|FBRL_HUMAN	195.174	6	6	11	14	32	16	19	20	1.27273	0.5	1.05263	Carbamidomethylation	33784.2	rRNA 2'-O-methyltransferase fibrillarin OS=Homo sapiens OX=9606 GN=FBL PE=1 SV=2
839	TRUE	Q99714|HCD2_HUMAN	290.742	13	13	77	90	85	106	115	121	1.16883	1.24706	1.05217	Oxidation (M); Carbamidomethylation	26923.1	3-hydroxyacyl-CoA dehydrogenase type-2 OS=Homo sapiens OX=9606 GN=HSD17B10 PE=1 SV=3
882	TRUE	P51648|AL3A2_HUMAN	287.336	12	11	93	94	65	78	58	61	1.01075	1.2	1.05172	Carbamidomethylation; Oxidation (M)	54847.8	Aldehyde dehydrogenase family 3 member A2 OS=Homo sapiens OX=9606 GN=ALDH3A2 PE=1 SV=1
1446	TRUE	P61204|ARF3_HUMAN	246.499	10	5	269	335	238	253	329	346	1.24535	1.06303	1.05167	Oxidation (M)	20600.8	ADP-ribosylation factor 3 OS=Homo sapiens OX=9606 GN=ARF3 PE=1 SV=2
1446	TRUE	P84077|ARF1_HUMAN	246.499	10	5	269	335	238	253	329	346	1.24535	1.06303	1.05167	Oxidation (M)	20696.8	ADP-ribosylation factor 1 OS=Homo sapiens OX=9606 GN=ARF1 PE=1 SV=2
75	TRUE	P29401|TKT_HUMAN	438.197	28	28	350	412	304	301	311	327	1.17714	0.990132	1.05145	Oxidation (M); Carbamidomethylation	67877.6	Transketolase OS=Homo sapiens OX=9606 GN=TKT PE=1 SV=3
1950	TRUE	P78318|IGBP1_HUMAN	217.703	8	8	36	25	26	28	39	41	0.694444	1.07692	1.05128	Oxidation (M)	39221.9	Immunoglobulin-binding protein 1 OS=Homo sapiens OX=9606 GN=IGBP1 PE=1 SV=1
260	TRUE	P04040|CATA_HUMAN	367.767	28	28	161	152	174	172	119	125	0.944099	0.988506	1.05042	Oxidation (M); Carbamidomethylation	59756.2	Catalase OS=Homo sapiens OX=9606 GN=CAT PE=1 SV=3
2093	TRUE	Q8IWE5|PKHM2_HUMAN	210.548	7	7	18	17	14	22	20	21	0.944444	1.57143	1.05	Carbamidomethylation	112780	Pleckstrin homology domain-containing family M member 2 OS=Homo sapiens OX=9606 GN=PLEKHM2 PE=1 SV=2
2350	TRUE	P63279|UBC9_HUMAN	197.126	6	6	27	32	32	40	40	42	1.18519	1.25	1.05	Carbamidomethylation; Oxidation (M)	18006.8	SUMO-conjugating enzyme UBC9 OS=Homo sapiens OX=9606 GN=UBE2I PE=1 SV=1
2918	TRUE	Q96K49|TM87B_HUMAN	168.899	3	3	24	15	12	13	20	21	0.625	1.08333	1.05	Carbamidomethylation	63536.2	Transmembrane protein 87B OS=Homo sapiens OX=9606 GN=TMEM87B PE=1 SV=1
1105	TRUE	Q14141|SEPT6_HUMAN	269.753	12	7	72	80	54	52	60	63	1.11111	0.962963	1.05	Carbamidomethylation; Oxidation (M)	49716.6	Septin-6 OS=Homo sapiens OX=9606 GN=SEPTIN6 PE=1 SV=4
2113	TRUE	Q16630|CPSF6_HUMAN	209.078	7	7	21	22	25	23	20	21	1.04762	0.92	1.05	Oxidation (M); Carbamidomethylation	59209.8	Cleavage and polyadenylation specificity factor subunit 6 OS=Homo sapiens OX=9606 GN=CPSF6 PE=1 SV=2
1202	TRUE	P48739|PIPNB_HUMAN	262.327	13	12	30	28	46	40	60	63	0.933333	0.869565	1.05	Carbamidomethylation; Oxidation (M)	31540.1	Phosphatidylinositol transfer protein beta isoform OS=Homo sapiens OX=9606 GN=PITPNB PE=1 SV=2
2309	TRUE	Q9Y478|AAKB1_HUMAN	199.154	6	6	22	33	15	6	20	21	1.5	0.4	1.05	Oxidation (M)	30382.3	5'-AMP-activated protein kinase subunit beta-1 OS=Homo sapiens OX=9606 GN=PRKAB1 PE=1 SV=4
413	TRUE	P67809|YBOX1_HUMAN	339.315	14	10	169	159	124	92	181	190	0.940828	0.741935	1.04972	Oxidation (M)	35924.2	Y-box-binding protein 1 OS=Homo sapiens OX=9606 GN=YBX1 PE=1 SV=3
781	TRUE	Q8TDB6|DTX3L_HUMAN	297.105	20	20	41	47	29	43	81	85	1.14634	1.48276	1.04938	Carbamidomethylation; Oxidation (M)	83554.3	E3 ubiquitin-protein ligase DTX3L OS=Homo sapiens OX=9606 GN=DTX3L PE=1 SV=1
784	TRUE	O14974|MYPT1_HUMAN	296.939	23	23	45	59	47	53	82	86	1.31111	1.12766	1.04878	Oxidation (M); Carbamidomethylation	115281	Protein phosphatase 1 regulatory subunit 12A OS=Homo sapiens OX=9606 GN=PPP1R12A PE=1 SV=1
895	TRUE	P55160|NCKPL_HUMAN	286.162	18	18	55	73	55	56	62	65	1.32727	1.01818	1.04839	Oxidation (M); Carbamidomethylation	128153	Nck-associated protein 1-like OS=Homo sapiens OX=9606 GN=NCKAP1L PE=1 SV=3
1761	TRUE	P00403|COX2_HUMAN	228.028	6	6	131	127	53	100	83	87	0.969466	1.88679	1.04819	Oxidation (M)	25565	Cytochrome c oxidase subunit 2 OS=Homo sapiens OX=9606 GN=MT-CO2 PE=1 SV=1
2193	TRUE	Q13546|RIPK1_HUMAN	205.355	9	9	23	34	12	15	21	22	1.47826	1.25	1.04762		75930.8	Receptor-interacting serine/threonine-protein kinase 1 OS=Homo sapiens OX=9606 GN=RIPK1 PE=1 SV=3
1898	TRUE	Q9UJY5|GGA1_HUMAN	220.248	10	10	44	56	50	49	63	66	1.27273	0.98	1.04762	Carbamidomethylation; Oxidation (M)	70384.2	ADP-ribosylation factor-binding protein GGA1 OS=Homo sapiens OX=9606 GN=GGA1 PE=1 SV=1
3201	TRUE	O43809|CPSF5_HUMAN	155.327	4	4	14	28	14	13	21	22	2	0.928571	1.04762		26227.3	Cleavage and polyadenylation specificity factor subunit 5 OS=Homo sapiens OX=9606 GN=NUDT21 PE=1 SV=1
2766	TRUE	O43567|RNF13_HUMAN	177.715	4	4	30	23	30	25	21	22	0.766667	0.833333	1.04762	Oxidation (M)	42813.6	E3 ubiquitin-protein ligase RNF13 OS=Homo sapiens OX=9606 GN=RNF13 PE=1 SV=1
1225	TRUE	O00203|AP3B1_HUMAN	260.558	21	21	30	48	40	33	42	44	1.6	0.825	1.04762	Carbamidomethylation; Oxidation (M)	121320	AP-3 complex subunit beta-1 OS=Homo sapiens OX=9606 GN=AP3B1 PE=1 SV=3
2522	TRUE	P98196|AT11A_HUMAN	189.082	7	7	19	25	9	7	21	22	1.31579	0.777778	1.04762	Carbamidomethylation; Oxidation (M)	129756	Probable phospholipid-transporting ATPase IH OS=Homo sapiens OX=9606 GN=ATP11A PE=1 SV=3
1418	TRUE	O15372|EIF3H_HUMAN	248.112	13	13	40	33	47	30	42	44	0.825	0.638298	1.04762	Oxidation (M); Carbamidomethylation	39930.3	Eukaryotic translation initiation factor 3 subunit H OS=Homo sapiens OX=9606 GN=EIF3H PE=1 SV=1
976	TRUE	Q15181|IPYR_HUMAN	279.12	11	10	78	94	81	122	127	133	1.20513	1.50617	1.04724	Carbamidomethylation; Oxidation (M)	32660	Inorganic pyrophosphatase OS=Homo sapiens OX=9606 GN=PPA1 PE=1 SV=2
252	TRUE	Q02818|NUCB1_HUMAN	369.437	25	25	220	180	113	109	108	113	0.818182	0.964602	1.0463	Oxidation (M)	53879.3	Nucleobindin-1 OS=Homo sapiens OX=9606 GN=NUCB1 PE=1 SV=4
475	TRUE	Q96HC4|PDLI5_HUMAN	332.149	22	22	72	51	90	73	109	114	0.708333	0.811111	1.04587	Oxidation (M); Carbamidomethylation	63945.1	PDZ and LIM domain protein 5 OS=Homo sapiens OX=9606 GN=PDLIM5 PE=1 SV=5
1768	TRUE	Q58FF6|H90B4_HUMAN	227.721	10	2	127	107	111	109	132	138	0.84252	0.981982	1.04545	Oxidation (M); Carbamidomethylation	58264.4	Putative heat shock protein HSP 90-beta 4 OS=Homo sapiens OX=9606 GN=HSP90AB4P PE=5 SV=1
2180	TRUE	Q16512|PKN1_HUMAN	205.892	11	11	15	22	16	11	22	23	1.46667	0.6875	1.04545		103932	Serine/threonine-protein kinase N1 OS=Homo sapiens OX=9606 GN=PKN1 PE=1 SV=2
122	TRUE	P20810|ICAL_HUMAN	410.881	36	36	357	349	258	250	222	232	0.977591	0.968992	1.04505	Carbamidomethylation; Oxidation (M)	76572.8	Calpastatin OS=Homo sapiens OX=9606 GN=CAST PE=1 SV=4
1828	TRUE	Q9H0E2|TOLIP_HUMAN	224.004	7	7	60	44	33	43	67	70	0.733333	1.30303	1.04478	Oxidation (M); Carbamidomethylation	30281.8	Toll-interacting protein OS=Homo sapiens OX=9606 GN=TOLLIP PE=1 SV=1
1471	TRUE	Q13136|LIPA1_HUMAN	244.848	12	12	49	37	39	28	45	47	0.755102	0.717949	1.04444		135779	Liprin-alpha-1 OS=Homo sapiens OX=9606 GN=PPFIA1 PE=1 SV=1
178	TRUE	Q9NZ08|ERAP1_HUMAN	387.032	33	33	166	166	191	232	275	287	1	1.21466	1.04364	Carbamidomethylation; Oxidation (M)	107235	Endoplasmic reticulum aminopeptidase 1 OS=Homo sapiens OX=9606 GN=ERAP1 PE=1 SV=3
2532	TRUE	Q92905|CSN5_HUMAN	188.333	4	4	25	35	15	24	23	24	1.4	1.6	1.04348	Oxidation (M)	37578.8	COP9 signalosome complex subunit 5 OS=Homo sapiens OX=9606 GN=COPS5 PE=1 SV=4
70	TRUE	P00558|PGK1_HUMAN	442.172	39	30	1070	1090	883	818	792	826	1.01869	0.926387	1.04293	Carbamidomethylation; Oxidation (M)	44614.7	Phosphoglycerate kinase 1 OS=Homo sapiens OX=9606 GN=PGK1 PE=1 SV=3
561	TRUE	O43815|STRN_HUMAN	320.651	20	20	66	73	55	70	71	74	1.10606	1.27273	1.04225	Carbamidomethylation; Oxidation (M)	86132.1	Striatin OS=Homo sapiens OX=9606 GN=STRN PE=1 SV=4
1233	TRUE	P00492|HPRT_HUMAN	259.845	12	12	66	81	44	40	71	74	1.22727	0.909091	1.04225	Carbamidomethylation; Oxidation (M)	24579.4	Hypoxanthine-guanine phosphoribosyltransferase OS=Homo sapiens OX=9606 GN=HPRT1 PE=1 SV=2
1958	TRUE	O75828|CBR3_HUMAN	217.197	8	6	12	16	11	21	24	25	1.33333	1.90909	1.04167		30850.2	Carbonyl reductase [NADPH] 3 OS=Homo sapiens OX=9606 GN=CBR3 PE=1 SV=3
2776	TRUE	Q32P28|P3H1_HUMAN	176.821	5	5	9	11	2	3	24	25	1.22222	1.5	1.04167	Oxidation (M); Carbamidomethylation	83393.9	Prolyl 3-hydroxylase 1 OS=Homo sapiens OX=9606 GN=P3H1 PE=1 SV=2
2166	TRUE	Q01804|OTUD4_HUMAN	206.267	9	9	10	11	18	16	24	25	1.1	0.888889	1.04167	Carbamidomethylation	124044	OTU domain-containing protein 4 OS=Homo sapiens OX=9606 GN=OTUD4 PE=1 SV=4
924	TRUE	Q3LXA3|TKFC_HUMAN	283.602	15	15	56	48	70	62	48	50	0.857143	0.885714	1.04167	Oxidation (M); Carbamidomethylation	58947.1	Triokinase/FMN cyclase OS=Homo sapiens OX=9606 GN=TKFC PE=1 SV=2
2074	TRUE	P01112|RASH_HUMAN	211.374	8	1	41	32	33	27	48	50	0.780488	0.818182	1.04167	Oxidation (M); Carbamidomethylation	21298.1	GTPase HRas OS=Homo sapiens OX=9606 GN=HRAS PE=1 SV=1
2267	TRUE	Q15438|CYH1_HUMAN	201.482	9	8	18	16	22	17	24	25	0.888889	0.772727	1.04167	Carbamidomethylation	46412.7	Cytohesin-1 OS=Homo sapiens OX=9606 GN=CYTH1 PE=1 SV=1
799	TRUE	Q15293|RCN1_HUMAN	295.033	15	15	105	121	45	80	97	101	1.15238	1.77778	1.04124	Oxidation (M)	38890	Reticulocalbin-1 OS=Homo sapiens OX=9606 GN=RCN1 PE=1 SV=1
2133	TRUE	P46734|MP2K3_HUMAN	208.28	8	8	35	26	41	25	123	128	0.742857	0.609756	1.04065	Oxidation (M); Carbamidomethylation	39318.4	Dual specificity mitogen-activated protein kinase kinase 3 OS=Homo sapiens OX=9606 GN=MAP2K3 PE=1 SV=2
407	TRUE	P26640|SYVC_HUMAN	340.324	26	26	93	74	109	112	148	154	0.795699	1.02752	1.04054	Carbamidomethylation; Oxidation (M)	140476	Valine--tRNA ligase OS=Homo sapiens OX=9606 GN=VARS1 PE=1 SV=4
2101	TRUE	P84085|ARF5_HUMAN	210.243	9	4	97	128	105	96	99	103	1.31959	0.914286	1.0404	Oxidation (M); Carbamidomethylation	20529.7	ADP-ribosylation factor 5 OS=Homo sapiens OX=9606 GN=ARF5 PE=1 SV=2
94	TRUE	Q07065|CKAP4_HUMAN	428.151	36	36	304	267	197	187	224	233	0.878289	0.949239	1.04018	Oxidation (M); Carbamidomethylation	66022.5	Cytoskeleton-associated protein 4 OS=Homo sapiens OX=9606 GN=CKAP4 PE=1 SV=2
2032	TRUE	O60315|ZEB2_HUMAN	213.266	11	11	27	23	7	13	25	26	0.851852	1.85714	1.04	Oxidation (M); Carbamidomethylation	136447	Zinc finger E-box-binding homeobox 2 OS=Homo sapiens OX=9606 GN=ZEB2 PE=1 SV=1
1180	TRUE	Q9H3P7|GCP60_HUMAN	264.068	11	11	45	36	30	32	50	52	0.8	1.06667	1.04	Oxidation (M)	60593.4	Golgi resident protein GCP60 OS=Homo sapiens OX=9606 GN=ACBD3 PE=1 SV=4
2096	TRUE	Q7Z460|CLAP1_HUMAN	210.454	11	9	11	18	8	8	25	26	1.63636	1	1.04	Carbamidomethylation	169451	CLIP-associating protein 1 OS=Homo sapiens OX=9606 GN=CLASP1 PE=1 SV=1
2153	TRUE	P18754|RCC1_HUMAN	207.181	6	6	10	16	18	18	25	26	1.6	1	1.04	Carbamidomethylation; Oxidation (M)	44969	Regulator of chromosome condensation OS=Homo sapiens OX=9606 GN=RCC1 PE=1 SV=1
1053	TRUE	Q9Y5K6|CD2AP_HUMAN	273.255	18	18	68	70	36	36	50	52	1.02941	1	1.04		71451.2	CD2-associated protein OS=Homo sapiens OX=9606 GN=CD2AP PE=1 SV=1
2412	TRUE	P51798|CLCN7_HUMAN	194.519	5	5	44	32	21	21	25	26	0.727273	1	1.04	Oxidation (M); Carbamidomethylation	88679.1	H(+)/Cl(-) exchange transporter 7 OS=Homo sapiens OX=9606 GN=CLCN7 PE=1 SV=2
2236	TRUE	Q15185|TEBP_HUMAN	202.944	4	4	44	56	48	46	50	52	1.27273	0.958333	1.04	Carbamidomethylation	18697.4	Prostaglandin E synthase 3 OS=Homo sapiens OX=9606 GN=PTGES3 PE=1 SV=1
1872	TRUE	P04150|GCR_HUMAN	221.545	9	9	13	20	18	14	25	26	1.53846	0.777778	1.04	Carbamidomethylation	85659.3	Glucocorticoid receptor OS=Homo sapiens OX=9606 GN=NR3C1 PE=1 SV=1
18	TRUE	Q14204|DYHC1_HUMAN	527.701	147	147	622	666	561	628	729	758	1.07074	1.11943	1.03978	Oxidation (M); Carbamidomethylation	532408	Cytoplasmic dynein 1 heavy chain 1 OS=Homo sapiens OX=9606 GN=DYNC1H1 PE=1 SV=5
401	TRUE	P35998|PRS7_HUMAN	341.529	24	24	143	126	108	95	126	131	0.881119	0.87963	1.03968	Carbamidomethylation; Oxidation (M)	48633.8	26S proteasome regulatory subunit 7 OS=Homo sapiens OX=9606 GN=PSMC2 PE=1 SV=3
665	TRUE	Q9ULZ3|ASC_HUMAN	309.069	16	16	120	125	133	140	177	184	1.04167	1.05263	1.03955	Oxidation (M); Carbamidomethylation	21626.8	Apoptosis-associated speck-like protein containing a CARD OS=Homo sapiens OX=9606 GN=PYCARD PE=1 SV=2
1077	TRUE	O14976|GAK_HUMAN	272.054	15	15	53	46	51	57	51	53	0.867925	1.11765	1.03922	Oxidation (M); Carbamidomethylation	143191	Cyclin-G-associated kinase OS=Homo sapiens OX=9606 GN=GAK PE=1 SV=2
556	TRUE	P51149|RAB7A_HUMAN	321.664	17	17	224	214	159	176	179	186	0.955357	1.10692	1.03911	Carbamidomethylation; Oxidation (M)	23489.7	Ras-related protein Rab-7a OS=Homo sapiens OX=9606 GN=RAB7A PE=1 SV=1
1043	TRUE	P62993|GRB2_HUMAN	274.107	14	14	39	39	39	60	52	54	1	1.53846	1.03846	Carbamidomethylation; Oxidation (M)	25206.3	Growth factor receptor-bound protein 2 OS=Homo sapiens OX=9606 GN=GRB2 PE=1 SV=1
2559	TRUE	Q8NE86|MCU_HUMAN	186.784	6	6	22	25	11	16	26	27	1.13636	1.45455	1.03846	Oxidation (M); Carbamidomethylation	39866.8	Calcium uniporter protein, mitochondrial OS=Homo sapiens OX=9606 GN=MCU PE=1 SV=1
964	TRUE	P52594|AGFG1_HUMAN	279.76	10	10	64	67	75	66	78	81	1.04688	0.88	1.03846	Oxidation (M)	58260.2	Arf-GAP domain and FG repeat-containing protein 1 OS=Homo sapiens OX=9606 GN=AGFG1 PE=1 SV=2
1122	TRUE	Q13185|CBX3_HUMAN	268.718	9	7	78	74	76	69	79	82	0.948718	0.907895	1.03797	Carbamidomethylation; Oxidation (M)	20811.4	Chromobox protein homolog 3 OS=Homo sapiens OX=9606 GN=CBX3 PE=1 SV=4
151	TRUE	P61158|ARP3_HUMAN	396.376	32	32	204	227	238	258	324	336	1.11275	1.08403	1.03704	Carbamidomethylation; Oxidation (M)	47371.2	Actin-related protein 3 OS=Homo sapiens OX=9606 GN=ACTR3 PE=1 SV=3
1047	TRUE	O00267|SPT5H_HUMAN	273.903	15	15	32	26	30	32	27	28	0.8125	1.06667	1.03704	Carbamidomethylation; Oxidation (M)	121000	Transcription elongation factor SPT5 OS=Homo sapiens OX=9606 GN=SUPT5H PE=1 SV=1
4043	TRUE	P14174|MIF_HUMAN	116.286	4	4	24	23	39	39	27	28	0.958333	1	1.03704	Oxidation (M); Carbamidomethylation	12476.3	Macrophage migration inhibitory factor OS=Homo sapiens OX=9606 GN=MIF PE=1 SV=4
65	TRUE	P50395|GDIB_HUMAN	448.423	43	32	613	682	488	532	547	567	1.11256	1.09016	1.03656	Carbamidomethylation; Oxidation (M)	50663.2	Rab GDP dissociation inhibitor beta OS=Homo sapiens OX=9606 GN=GDI2 PE=1 SV=2
652	TRUE	Q6NUK1|SCMC1_HUMAN	310.307	19	19	146	146	117	213	192	199	1	1.82051	1.03646	Oxidation (M); Carbamidomethylation	53354.4	Calcium-binding mitochondrial carrier protein SCaMC-1 OS=Homo sapiens OX=9606 GN=SLC25A24 PE=1 SV=2
1700	TRUE	Q9NRX4|PHP14_HUMAN	231.068	6	6	32	34	26	52	56	58	1.0625	2	1.03571	Oxidation (M); Carbamidomethylation	13832.5	14 kDa phosphohistidine phosphatase OS=Homo sapiens OX=9606 GN=PHPT1 PE=1 SV=1
1956	TRUE	Q05519|SRS11_HUMAN	217.245	6	6	37	42	20	26	28	29	1.13514	1.3	1.03571		53542.2	Serine/arginine-rich splicing factor 11 OS=Homo sapiens OX=9606 GN=SRSF11 PE=1 SV=1
1618	TRUE	O94905|ERLN2_HUMAN	235.46	11	8	42	55	33	41	56	58	1.30952	1.24242	1.03571	Carbamidomethylation; Oxidation (M)	37839.5	Erlin-2 OS=Homo sapiens OX=9606 GN=ERLIN2 PE=1 SV=1
711	TRUE	P00441|SODC_HUMAN	303.339	9	9	89	76	63	71	56	58	0.853933	1.12698	1.03571	Carbamidomethylation	15935.7	Superoxide dismutase [Cu-Zn] OS=Homo sapiens OX=9606 GN=SOD1 PE=1 SV=2
626	TRUE	Q9UGP8|SEC63_HUMAN	313.288	16	16	71	68	79	88	84	87	0.957746	1.11392	1.03571	Oxidation (M); Carbamidomethylation	87996.9	Translocation protein SEC63 homolog OS=Homo sapiens OX=9606 GN=SEC63 PE=1 SV=2
943	TRUE	P61163|ACTZ_HUMAN	282.174	13	6	78	86	88	91	84	87	1.10256	1.03409	1.03571	Oxidation (M)	42613.7	Alpha-centractin OS=Homo sapiens OX=9606 GN=ACTR1A PE=1 SV=1
1472	TRUE	P61586|RHOA_HUMAN	244.836	9	4	67	70	81	68	56	58	1.04478	0.839506	1.03571	Oxidation (M); Carbamidomethylation	21768.1	Transforming protein RhoA OS=Homo sapiens OX=9606 GN=RHOA PE=1 SV=1
417	TRUE	Q14839|CHD4_HUMAN	338.693	27	27	75	84	60	76	113	117	1.12	1.26667	1.0354	Oxidation (M); Carbamidomethylation	218005	Chromodomain-helicase-DNA-binding protein 4 OS=Homo sapiens OX=9606 GN=CHD4 PE=1 SV=2
539	TRUE	P54578|UBP14_HUMAN	324.62	20	20	107	93	91	96	113	117	0.869159	1.05495	1.0354	Carbamidomethylation; Oxidation (M)	56069.1	Ubiquitin carboxyl-terminal hydrolase 14 OS=Homo sapiens OX=9606 GN=USP14 PE=1 SV=3
1601	TRUE	P05771|KPCB_HUMAN	236.558	11	7	74	76	62	65	85	88	1.02703	1.04839	1.03529	Carbamidomethylation; Oxidation (M)	76868.9	Protein kinase C beta type OS=Homo sapiens OX=9606 GN=PRKCB PE=1 SV=4
975	FALSE	Q8NFI4|F10A5_HUMAN	183.741	6	3	43	50	37	36	57	59	1.16279	0.972973	1.03509	Carbamidomethylation; Oxidation (M)	41377.7	Putative protein FAM10A5 OS=Homo sapiens OX=9606 GN=ST13P5 PE=5 SV=1
2189	TRUE	Q9Y286|SIGL7_HUMAN	205.533	7	7	23	25	44	57	29	30	1.08696	1.29545	1.03448	Oxidation (M)	51142.7	Sialic acid-binding Ig-like lectin 7 OS=Homo sapiens OX=9606 GN=SIGLEC7 PE=1 SV=1
1702	TRUE	O14656|TOR1A_HUMAN	230.981	10	9	20	26	10	7	29	30	1.3	0.7	1.03448	Oxidation (M)	37808.7	Torsin-1A OS=Homo sapiens OX=9606 GN=TOR1A PE=1 SV=1
899	TRUE	P84095|RHOG_HUMAN	285.553	11	11	84	90	74	72	88	91	1.07143	0.972973	1.03409	Carbamidomethylation	21308.5	Rho-related GTP-binding protein RhoG OS=Homo sapiens OX=9606 GN=RHOG PE=1 SV=1
372	TRUE	P07737|PROF1_HUMAN	346.578	20	20	451	433	274	303	417	431	0.960089	1.10584	1.03357	Oxidation (M); Carbamidomethylation	15054.2	Profilin-1 OS=Homo sapiens OX=9606 GN=PFN1 PE=1 SV=2
356	TRUE	Q13510|ASAH1_HUMAN	349.067	22	22	440	377	354	344	389	402	0.856818	0.971751	1.03342	Carbamidomethylation; Oxidation (M)	44659.6	Acid ceramidase OS=Homo sapiens OX=9606 GN=ASAH1 PE=1 SV=5
472	TRUE	O15031|PLXB2_HUMAN	332.322	24	24	64	62	34	45	60	62	0.96875	1.32353	1.03333	Oxidation (M); Carbamidomethylation	205127	Plexin-B2 OS=Homo sapiens OX=9606 GN=PLXNB2 PE=1 SV=3
1516	TRUE	Q09161|NCBP1_HUMAN	241.477	12	12	19	22	21	23	30	31	1.15789	1.09524	1.03333	Carbamidomethylation	91839.4	Nuclear cap-binding protein subunit 1 OS=Homo sapiens OX=9606 GN=NCBP1 PE=1 SV=1
982	TRUE	P46926|GNPI1_HUMAN	278.669	8	5	42	46	46	47	60	62	1.09524	1.02174	1.03333	Oxidation (M); Carbamidomethylation	32668.5	Glucosamine-6-phosphate isomerase 1 OS=Homo sapiens OX=9606 GN=GNPDA1 PE=1 SV=1
294	TRUE	Q5VYK3|ECM29_HUMAN	359.147	31	31	91	98	104	87	120	124	1.07692	0.836538	1.03333	Oxidation (M); Carbamidomethylation	204291	Proteasome adapter and scaffold protein ECM29 OS=Homo sapiens OX=9606 GN=ECPAS PE=1 SV=2
2241	TRUE	O75663|TIPRL_HUMAN	202.764	11	11	39	25	31	25	30	31	0.641026	0.806452	1.03333	Carbamidomethylation; Oxidation (M)	31444	TIP41-like protein OS=Homo sapiens OX=9606 GN=TIPRL PE=1 SV=2
3579	TRUE	O95139|NDUB6_HUMAN	136.982	3	3	80	51	59		30	31	0.6375	0.0169492	1.03333	Oxidation (M)	15489.2	NADH dehydrogenase [ubiquinone] 1 beta subcomplex subunit 6 OS=Homo sapiens OX=9606 GN=NDUFB6 PE=1 SV=3
1490	TRUE	Q8N565|MREG_HUMAN	243.512	9	9	50	46	57	59	31	32	0.92	1.03509	1.03226	Carbamidomethylation; Oxidation (M)	24927.4	Melanoregulin OS=Homo sapiens OX=9606 GN=MREG PE=1 SV=1
2220	TRUE	Q99729|ROAA_HUMAN	204.096	7	6	97	96	39	30	62	64	0.989691	0.769231	1.03226	Carbamidomethylation; Oxidation (M)	36224.9	Heterogeneous nuclear ribonucleoprotein A/B OS=Homo sapiens OX=9606 GN=HNRNPAB PE=1 SV=2
623	TRUE	Q9P2R3|ANFY1_HUMAN	313.716	18	18	42	57	54	65	94	97	1.35714	1.2037	1.03191	Carbamidomethylation; Oxidation (M)	128399	Rabankyrin-5 OS=Homo sapiens OX=9606 GN=ANKFY1 PE=1 SV=2
433	TRUE	Q9UBC2|EP15R_HUMAN	337.104	27	27	83	85	108	83	94	97	1.0241	0.768519	1.03191	Carbamidomethylation; Oxidation (M)	94255.1	Epidermal growth factor receptor substrate 15-like 1 OS=Homo sapiens OX=9606 GN=EPS15L1 PE=1 SV=1
861	TRUE	P05362|ICAM1_HUMAN	289.159	16	16	56	67	39	58	63	65	1.19643	1.48718	1.03175	Carbamidomethylation	57825.2	Intercellular adhesion molecule 1 OS=Homo sapiens OX=9606 GN=ICAM1 PE=1 SV=2
1895	TRUE	P61006|RAB8A_HUMAN	220.363	8	5	69	77	20	23	32	33	1.11594	1.15	1.03125		23668.2	Ras-related protein Rab-8A OS=Homo sapiens OX=9606 GN=RAB8A PE=1 SV=1
1507	TRUE	Q8NDH3|PEPL1_HUMAN	242.343	10	10	38	42	24	21	32	33	1.10526	0.875	1.03125	Carbamidomethylation; Oxidation (M)	55860.9	Probable aminopeptidase NPEPL1 OS=Homo sapiens OX=9606 GN=NPEPL1 PE=1 SV=3
2146	TRUE	Q9Y5M8|SRPRB_HUMAN	207.822	6	6	28	34	39	33	32	33	1.21429	0.846154	1.03125	Carbamidomethylation	29702.2	Signal recognition particle receptor subunit beta OS=Homo sapiens OX=9606 GN=SRPRB PE=1 SV=3
1578	TRUE	P23497|SP100_HUMAN	237.755	9	8	34	42	19	21	33	34	1.23529	1.10526	1.0303	Carbamidomethylation; Oxidation (M)	100417	Nuclear autoantigen Sp-100 OS=Homo sapiens OX=9606 GN=SP100 PE=1 SV=3
1681	TRUE	O15042|SR140_HUMAN	232.233	8	8	28	37	28	19	33	34	1.32143	0.678571	1.0303	Carbamidomethylation	118292	U2 snRNP-associated SURP motif-containing protein OS=Homo sapiens OX=9606 GN=U2SURP PE=1 SV=2
588	TRUE	A8MUU1|FB5L3_HUMAN	317.101	15	1	222	217	121	140	235	242	0.977477	1.15702	1.02979	Carbamidomethylation	11298.8	Putative fatty acid-binding protein 5-like protein 3 OS=Homo sapiens OX=9606 GN=FABP5P3 PE=5 SV=1
3019	TRUE	O75629|CREG1_HUMAN	164.144	3	3	24	19	30	33	34	35	0.791667	1.1	1.02941		24074.5	Protein CREG1 OS=Homo sapiens OX=9606 GN=CREG1 PE=1 SV=1
1785	TRUE	O43837|IDH3B_HUMAN	226.154	8	8	45	52	38	36	34	35	1.15556	0.947368	1.02941	Oxidation (M); Carbamidomethylation	42183.7	Isocitrate dehydrogenase [NAD] subunit beta, mitochondrial OS=Homo sapiens OX=9606 GN=IDH3B PE=1 SV=2
1419	TRUE	Q8IZ83|A16A1_HUMAN	247.927	10	10	36	43	22	28	35	36	1.19444	1.27273	1.02857	Carbamidomethylation; Oxidation (M)	85127.4	Aldehyde dehydrogenase family 16 member A1 OS=Homo sapiens OX=9606 GN=ALDH16A1 PE=1 SV=2
2123	TRUE	Q58FG1|HS904_HUMAN	208.599	7	1	213	199	204	218	178	183	0.934272	1.06863	1.02809	Oxidation (M)	47711.9	Putative heat shock protein HSP 90-alpha A4 OS=Homo sapiens OX=9606 GN=HSP90AA4P PE=5 SV=1
130	TRUE	P31946|1433B_HUMAN	405.302	25	16	815	693	407	365	577	593	0.850307	0.896806	1.02773	Oxidation (M); Carbamidomethylation	28082.4	14-3-3 protein beta/alpha OS=Homo sapiens OX=9606 GN=YWHAB PE=1 SV=3
309	TRUE	Q7L576|CYFP1_HUMAN	357.162	32	20	162	172	166	171	221	227	1.06173	1.03012	1.02715	Oxidation (M); Carbamidomethylation	145182	Cytoplasmic FMR1-interacting protein 1 OS=Homo sapiens OX=9606 GN=CYFIP1 PE=1 SV=1
1203	TRUE	Q9Y5B9|SP16H_HUMAN	262.264	16	16	30	49	30	47	37	38	1.63333	1.56667	1.02703	Oxidation (M); Carbamidomethylation	119914	FACT complex subunit SPT16 OS=Homo sapiens OX=9606 GN=SUPT16H PE=1 SV=1
1805	TRUE	P35637|FUS_HUMAN	224.995	8	7	30	21	30	42	37	38	0.7	1.4	1.02703	Carbamidomethylation; Oxidation (M)	53425.8	RNA-binding protein FUS OS=Homo sapiens OX=9606 GN=FUS PE=1 SV=1
888	TRUE	O14818|PSA7_HUMAN	286.537	13	13	78	88	45	60	74	76	1.12821	1.33333	1.02703	Carbamidomethylation; Oxidation (M)	27886.8	Proteasome subunit alpha type-7 OS=Homo sapiens OX=9606 GN=PSMA7 PE=1 SV=1
1756	TRUE	P01040|CYTA_HUMAN	228.236	6	6	37	36	28	30	37	38	0.972973	1.07143	1.02703		11006.5	Cystatin-A OS=Homo sapiens OX=9606 GN=CSTA PE=1 SV=1
1660	TRUE	P46109|CRKL_HUMAN	233.094	9	9	35	32	31	26	37	38	0.914286	0.83871	1.02703	Carbamidomethylation; Oxidation (M)	33777	Crk-like protein OS=Homo sapiens OX=9606 GN=CRKL PE=1 SV=1
692	TRUE	P09493|TPM1_HUMAN	305.543	18	1	256	238	181	152	188	193	0.929688	0.839779	1.0266	Oxidation (M)	32708.6	Tropomyosin alpha-1 chain OS=Homo sapiens OX=9606 GN=TPM1 PE=1 SV=2
2614	TRUE	Q9NPQ8|RIC8A_HUMAN	184.498	5	5	23	19	17	22	38	39	0.826087	1.29412	1.02632	Oxidation (M); Carbamidomethylation	59709.5	Synembryn-A OS=Homo sapiens OX=9606 GN=RIC8A PE=1 SV=3
2154	TRUE	Q9NWV8|BABA1_HUMAN	207.143	5	5	23	32	30	28	38	39	1.3913	0.933333	1.02632	Carbamidomethylation; Oxidation (M)	36560	BRISC and BRCA1-A complex member 1 OS=Homo sapiens OX=9606 GN=BABAM1 PE=1 SV=1
666	TRUE	P42331|RHG25_HUMAN	308.915	27	27	73	70	118	102	76	78	0.958904	0.864407	1.02632	Carbamidomethylation; Oxidation (M)	73435.2	Rho GTPase-activating protein 25 OS=Homo sapiens OX=9606 GN=ARHGAP25 PE=1 SV=2
239	TRUE	P53396|ACLY_HUMAN	372.397	35	35	176	210	183	190	229	235	1.19318	1.03825	1.0262	Oxidation (M); Carbamidomethylation	120839	ATP-citrate synthase OS=Homo sapiens OX=9606 GN=ACLY PE=1 SV=3
265	TRUE	O43390|HNRPR_HUMAN	366.964	21	17	134	161	93	107	115	118	1.20149	1.15054	1.02609	Oxidation (M); Carbamidomethylation	70943.1	Heterogeneous nuclear ribonucleoprotein R OS=Homo sapiens OX=9606 GN=HNRNPR PE=1 SV=1
1374	TRUE	P04264|K2C1_HUMAN	251.13	13	11	49	45	45	44	40	41	0.918367	0.977778	1.025	Oxidation (M)	66038.7	Keratin, type II cytoskeletal 1 OS=Homo sapiens OX=9606 GN=KRT1 PE=1 SV=6
434	TRUE	P21283|VATC1_HUMAN	337.064	21	21	176	192	126	151	162	166	1.09091	1.19841	1.02469	Oxidation (M); Carbamidomethylation	43941.6	V-type proton ATPase subunit C 1 OS=Homo sapiens OX=9606 GN=ATP6V1C1 PE=1 SV=4
479	TRUE	Q12913|PTPRJ_HUMAN	331.824	19	19	83	85	62	70	81	83	1.0241	1.12903	1.02469	Oxidation (M); Carbamidomethylation	145941	Receptor-type tyrosine-protein phosphatase eta OS=Homo sapiens OX=9606 GN=PTPRJ PE=1 SV=3
1514	TRUE	Q9Y6M5|ZNT1_HUMAN	241.825	9	9	27	41	15	39	41	42	1.51852	2.6	1.02439	Carbamidomethylation	55299.8	Zinc transporter 1 OS=Homo sapiens OX=9606 GN=SLC30A1 PE=1 SV=3
2919	TRUE	P55145|MANF_HUMAN	168.898	6	6	46	35	12	19	41	42	0.76087	1.58333	1.02439	Carbamidomethylation	20700.1	Mesencephalic astrocyte-derived neurotrophic factor OS=Homo sapiens OX=9606 GN=MANF PE=1 SV=3
1357	TRUE	O94776|MTA2_HUMAN	252.169	12	12	28	41	18	27	41	42	1.46429	1.5	1.02439	Carbamidomethylation	75023.1	Metastasis-associated protein MTA2 OS=Homo sapiens OX=9606 GN=MTA2 PE=1 SV=1
1339	TRUE	O75489|NDUS3_HUMAN	253.403	9	9	57	63	43	52	41	42	1.10526	1.2093	1.02439		30241.5	NADH dehydrogenase [ubiquinone] iron-sulfur protein 3, mitochondrial OS=Homo sapiens OX=9606 GN=NDUFS3 PE=1 SV=1
1512	TRUE	P26885|FKBP2_HUMAN	241.941	6	6	91	80	57	64	82	84	0.879121	1.12281	1.02439	Oxidation (M); Carbamidomethylation	15649.3	Peptidyl-prolyl cis-trans isomerase FKBP2 OS=Homo sapiens OX=9606 GN=FKBP2 PE=1 SV=2
1368	TRUE	Q06187|BTK_HUMAN	251.492	16	16	30	42	32	25	41	42	1.4	0.78125	1.02439	Carbamidomethylation; Oxidation (M)	76281.2	Tyrosine-protein kinase BTK OS=Homo sapiens OX=9606 GN=BTK PE=1 SV=3
476	TRUE	O14617|AP3D1_HUMAN	332.027	23	23	67	91	78	83	125	128	1.35821	1.0641	1.024	Carbamidomethylation; Oxidation (M)	130158	AP-3 complex subunit delta-1 OS=Homo sapiens OX=9606 GN=AP3D1 PE=1 SV=1
26	TRUE	P07900|HS90A_HUMAN	512.929	64	33	1142	1177	1109	1086	1339	1371	1.03065	0.979261	1.0239	Oxidation (M); Carbamidomethylation	84659.7	Heat shock protein HSP 90-alpha OS=Homo sapiens OX=9606 GN=HSP90AA1 PE=1 SV=5
1717	TRUE	Q9P253|VPS18_HUMAN	230.109	12	12	25	32	29	27	43	44	1.28	0.931034	1.02326	Carbamidomethylation	110186	Vacuolar protein sorting-associated protein 18 homolog OS=Homo sapiens OX=9606 GN=VPS18 PE=1 SV=2
367	TRUE	O60488|ACSL4_HUMAN	347.125	26	23	101	125	76	97	130	133	1.23762	1.27632	1.02308	Oxidation (M); Carbamidomethylation	79188	Long-chain-fatty-acid--CoA ligase 4 OS=Homo sapiens OX=9606 GN=ACSL4 PE=1 SV=2
56	TRUE	Q68CZ2|TENS3_HUMAN	455.594	45	43	364	323	454	408	404	413	0.887363	0.898678	1.02228	Carbamidomethylation; Oxidation (M)	155266	Tensin-3 OS=Homo sapiens OX=9606 GN=TNS3 PE=1 SV=2
731	TRUE	Q8NC51|PAIRB_HUMAN	301.826	13	13	97	119	94	70	91	93	1.2268	0.744681	1.02198	Carbamidomethylation; Oxidation (M)	44965.4	Plasminogen activator inhibitor 1 RNA-binding protein OS=Homo sapiens OX=9606 GN=SERBP1 PE=1 SV=2
1840	TRUE	O95865|DDAH2_HUMAN	223.511	6	6	38	36	46	54	47	48	0.947368	1.17391	1.02128	Carbamidomethylation	29643.9	N(G),N(G)-dimethylarginine dimethylaminohydrolase 2 OS=Homo sapiens OX=9606 GN=DDAH2 PE=1 SV=1
2191	TRUE	Q7L9L4|MOB1B_HUMAN	205.395	6	6	29	32	28	30	47	48	1.10345	1.07143	1.02128		25090.8	MOB kinase activator 1B OS=Homo sapiens OX=9606 GN=MOB1B PE=1 SV=3
2191	TRUE	Q9H8S9|MOB1A_HUMAN	205.395	6	6	29	32	28	30	47	48	1.10345	1.07143	1.02128		25079.8	MOB kinase activator 1A OS=Homo sapiens OX=9606 GN=MOB1A PE=1 SV=4
577	TRUE	Q92945|FUBP2_HUMAN	319.176	16	16	202	182	139	147	190	194	0.90099	1.05755	1.02105	Oxidation (M)	73115.3	Far upstream element-binding protein 2 OS=Homo sapiens OX=9606 GN=KHSRP PE=1 SV=4
786	TRUE	O43143|DHX15_HUMAN	296.831	20	19	102	126	88	127	144	147	1.23529	1.44318	1.02083	Oxidation (M); Carbamidomethylation	90932.8	Pre-mRNA-splicing factor ATP-dependent RNA helicase DHX15 OS=Homo sapiens OX=9606 GN=DHX15 PE=1 SV=2
2242	TRUE	Q9NP97|DLRB1_HUMAN	202.616	6	6	40	52	39	39	48	49	1.3	1	1.02083	Oxidation (M)	10921.6	Dynein light chain roadblock-type 1 OS=Homo sapiens OX=9606 GN=DYNLRB1 PE=1 SV=3
762	TRUE	Q08AM6|VAC14_HUMAN	299.073	19	19	79	65	68	52	98	100	0.822785	0.764706	1.02041	Carbamidomethylation; Oxidation (M)	87972.7	Protein VAC14 homolog OS=Homo sapiens OX=9606 GN=VAC14 PE=1 SV=1
700	TRUE	Q9H2U2|IPYR2_HUMAN	304.6	15	14	97	90	62	66	51	52	0.927835	1.06452	1.01961	Oxidation (M); Carbamidomethylation	37920.2	Inorganic pyrophosphatase 2, mitochondrial OS=Homo sapiens OX=9606 GN=PPA2 PE=1 SV=2
1686	TRUE	P08621|RU17_HUMAN	231.971	7	7	28	30	23	19	52	53	1.07143	0.826087	1.01923	Oxidation (M)	51556.7	U1 small nuclear ribonucleoprotein 70 kDa OS=Homo sapiens OX=9606 GN=SNRNP70 PE=1 SV=2
660	TRUE	P62195|PRS8_HUMAN	309.539	17	16	88	91	55	67	106	108	1.03409	1.21818	1.01887	Carbamidomethylation; Oxidation (M)	45626	26S proteasome regulatory subunit 8 OS=Homo sapiens OX=9606 GN=PSMC5 PE=1 SV=1
840	TRUE	Q15233|NONO_HUMAN	290.719	17	16	98	98	68	95	107	109	1	1.39706	1.01869	Carbamidomethylation; Oxidation (M)	54231.5	Non-POU domain-containing octamer-binding protein OS=Homo sapiens OX=9606 GN=NONO PE=1 SV=4
426	TRUE	P13489|RINI_HUMAN	337.491	22	22	105	106	87	109	162	165	1.00952	1.25287	1.01852	Carbamidomethylation; Oxidation (M)	49973.5	Ribonuclease inhibitor OS=Homo sapiens OX=9606 GN=RNH1 PE=1 SV=2
690	TRUE	O95466|FMNL1_HUMAN	305.782	18	18	81	99	62	89	110	112	1.22222	1.43548	1.01818	Carbamidomethylation; Oxidation (M)	121854	Formin-like protein 1 OS=Homo sapiens OX=9606 GN=FMNL1 PE=1 SV=3
86	TRUE	P07858|CATB_HUMAN	433.621	26	26	556	401	629	878	715	728	0.721223	1.39587	1.01818	Oxidation (M); Carbamidomethylation	37821.6	Cathepsin B OS=Homo sapiens OX=9606 GN=CTSB PE=1 SV=3
412	TRUE	P17931|LEG3_HUMAN	339.513	28	27	517	469	242	229	285	290	0.907157	0.946281	1.01754	Oxidation (M)	26152.3	Galectin-3 OS=Homo sapiens OX=9606 GN=LGALS3 PE=1 SV=5
169	TRUE	P19878|NCF2_HUMAN	390.005	31	31	163	162	166	228	230	234	0.993865	1.37349	1.01739	Oxidation (M); Carbamidomethylation	59761.5	Neutrophil cytosol factor 2 OS=Homo sapiens OX=9606 GN=NCF2 PE=1 SV=2
63	TRUE	O75923|DYSF_HUMAN	448.873	65	62	430	434	138	191	186	189	1.0093	1.38406	1.01613	Carbamidomethylation; Oxidation (M)	237295	Dysferlin OS=Homo sapiens OX=9606 GN=DYSF PE=1 SV=1
27	TRUE	Q9NZM1|MYOF_HUMAN	511.398	112	107	954	1094	578	800	696	707	1.14675	1.38408	1.0158	Carbamidomethylation; Oxidation (M)	234709	Myoferlin OS=Homo sapiens OX=9606 GN=MYOF PE=1 SV=1
494	TRUE	P61160|ARP2_HUMAN	329.75	19	19	338	356	347	282	400	406	1.05325	0.81268	1.015	Oxidation (M); Carbamidomethylation	44760.8	Actin-related protein 2 OS=Homo sapiens OX=9606 GN=ACTR2 PE=1 SV=1
664	TRUE	Q08J23|NSUN2_HUMAN	309.101	20	20	59	72	75	60	70	71	1.22034	0.8	1.01429	Carbamidomethylation	86470.7	RNA cytosine C(5)-methyltransferase NSUN2 OS=Homo sapiens OX=9606 GN=NSUN2 PE=1 SV=2
923	TRUE	O75436|VP26A_HUMAN	283.785	15	15	47	50	48	37	71	72	1.06383	0.770833	1.01408	Oxidation (M)	38169.9	Vacuolar protein sorting-associated protein 26A OS=Homo sapiens OX=9606 GN=VPS26A PE=1 SV=2
706	TRUE	Q14161|GIT2_HUMAN	304.167	16	15	44	36	45	42	72	73	0.818182	0.933333	1.01389	Carbamidomethylation; Oxidation (M)	84542.7	ARF GTPase-activating protein GIT2 OS=Homo sapiens OX=9606 GN=GIT2 PE=1 SV=2
2607	TRUE	Q13404|UB2V1_HUMAN	184.716	5	2	62	71	83	64	72	73	1.14516	0.771084	1.01389	Oxidation (M); Carbamidomethylation	16495	Ubiquitin-conjugating enzyme E2 variant 1 OS=Homo sapiens OX=9606 GN=UBE2V1 PE=1 SV=2
1188	TRUE	P60900|PSA6_HUMAN	263.367	11	11	38	43	44	62	76	77	1.13158	1.40909	1.01316	Carbamidomethylation; Oxidation (M)	27399.4	Proteasome subunit alpha type-6 OS=Homo sapiens OX=9606 GN=PSMA6 PE=1 SV=1
1073	TRUE	Q15907|RB11B_HUMAN	272.173	11	2	65	74	63	100	80	81	1.13846	1.5873	1.0125	Oxidation (M)	24488.5	Ras-related protein Rab-11B OS=Homo sapiens OX=9606 GN=RAB11B PE=1 SV=4
259	TRUE	P18669|PGAM1_HUMAN	368.22	18	13	703	650	500	464	483	489	0.924609	0.928	1.01242	Carbamidomethylation; Oxidation (M)	28803.9	Phosphoglycerate mutase 1 OS=Homo sapiens OX=9606 GN=PGAM1 PE=1 SV=2
463	TRUE	Q16719|KYNU_HUMAN	333.419	23	23	158	139	147	166	164	166	0.879747	1.12925	1.0122	Oxidation (M); Carbamidomethylation	52351.6	Kynureninase OS=Homo sapiens OX=9606 GN=KYNU PE=1 SV=1
244	TRUE	Q9ULV4|COR1C_HUMAN	371.256	22	21	202	201	141	128	165	167	0.99505	0.907801	1.01212	Carbamidomethylation; Oxidation (M)	53249	Coronin-1C OS=Homo sapiens OX=9606 GN=CORO1C PE=1 SV=1
324	TRUE	P50991|TCPD_HUMAN	355.743	25	23	180	193	211	190	175	177	1.07222	0.900474	1.01143	Oxidation (M); Carbamidomethylation	57924.2	T-complex protein 1 subunit delta OS=Homo sapiens OX=9606 GN=CCT4 PE=1 SV=4
1016	TRUE	Q14103|HNRPD_HUMAN	276.31	11	10	102	134	72	84	89	90	1.31373	1.16667	1.01124	Oxidation (M); Carbamidomethylation	38434.2	Heterogeneous nuclear ribonucleoprotein D0 OS=Homo sapiens OX=9606 GN=HNRNPD PE=1 SV=1
726	TRUE	O95340|PAPS2_HUMAN	302.177	17	17	80	88	53	49	89	90	1.1	0.924528	1.01124	Oxidation (M); Carbamidomethylation	69500.7	Bifunctional 3'-phosphoadenosine 5'-phosphosulfate synthase 2 OS=Homo sapiens OX=9606 GN=PAPSS2 PE=1 SV=2
1135	TRUE	Q9Y277|VDAC3_HUMAN	268.164	9	8	61	90	77	81	90	91	1.47541	1.05195	1.01111	Carbamidomethylation	30658.7	Voltage-dependent anion-selective channel protein 3 OS=Homo sapiens OX=9606 GN=VDAC3 PE=1 SV=1
41	TRUE	P04406|G3P_HUMAN	481.208	58	57	2686	2607	2293	1891	4815	4858	0.970588	0.824684	1.00893	Oxidation (M); Carbamidomethylation	36053.2	Glyceraldehyde-3-phosphate dehydrogenase OS=Homo sapiens OX=9606 GN=GAPDH PE=1 SV=3
108	TRUE	P60174|TPIS_HUMAN	415.83	29	29	499	513	402	409	449	453	1.02806	1.01741	1.00891	Carbamidomethylation; Oxidation (M)	26669.5	Triosephosphate isomerase OS=Homo sapiens OX=9606 GN=TPI1 PE=1 SV=4
126	TRUE	P54652|HSP72_HUMAN	407.342	34	4	376	390	340	312	450	454	1.03723	0.917647	1.00889	Carbamidomethylation; Oxidation (M)	70021	Heat shock-related 70 kDa protein 2 OS=Homo sapiens OX=9606 GN=HSPA2 PE=1 SV=1
230	TRUE	P27816|MAP4_HUMAN	373.348	38	38	298	284	252	243	241	243	0.95302	0.964286	1.0083	Carbamidomethylation; Oxidation (M)	121005	Microtubule-associated protein 4 OS=Homo sapiens OX=9606 GN=MAP4 PE=1 SV=3
698	TRUE	P23469|PTPRE_HUMAN	304.69	21	21	71	88	46	46	121	122	1.23944	1	1.00826	Carbamidomethylation; Oxidation (M)	80641.7	Receptor-type tyrosine-protein phosphatase epsilon OS=Homo sapiens OX=9606 GN=PTPRE PE=1 SV=1
637	TRUE	P62820|RAB1A_HUMAN	311.91	14	4	527	565	264	325	264	266	1.07211	1.23106	1.00758	Carbamidomethylation; Oxidation (M)	22677.7	Ras-related protein Rab-1A OS=Homo sapiens OX=9606 GN=RAB1A PE=1 SV=3
201	TRUE	P50570|DYN2_HUMAN	381.483	25	20	169	152	126	152	154	155	0.899408	1.20635	1.00649	Oxidation (M); Carbamidomethylation	98064.3	Dynamin-2 OS=Homo sapiens OX=9606 GN=DNM2 PE=1 SV=2
440	TRUE	Q86VP6|CAND1_HUMAN	335.977	29	29	162	182	160	152	155	156	1.12346	0.95	1.00645	Carbamidomethylation; Oxidation (M)	136376	Cullin-associated NEDD8-dissociated protein 1 OS=Homo sapiens OX=9606 GN=CAND1 PE=1 SV=2
4	TRUE	Q9Y490|TLN1_HUMAN	656.997	168	158	2080	2198	1883	1981	2306	2318	1.05673	1.05204	1.0052	Oxidation (M); Carbamidomethylation	269767	Talin-1 OS=Homo sapiens OX=9606 GN=TLN1 PE=1 SV=3
11	TRUE	P14618|KPYM_HUMAN	562.401	78	78	1631	1572	2540	2332	3203	3206	0.963826	0.91811	1.00094	Carbamidomethylation; Oxidation (M)	57936.9	Pyruvate kinase PKM OS=Homo sapiens OX=9606 GN=PKM PE=1 SV=4
2983	TRUE	Q9Y508|RN114_HUMAN	166.273	3	3	4	7		13	17	17	1.75	13	1	Carbamidomethylation; Oxidation (M)	25694.3	E3 ubiquitin-protein ligase RNF114 OS=Homo sapiens OX=9606 GN=RNF114 PE=1 SV=1
4339	TRUE	Q8TEB9|RHBL4_HUMAN	101.806	1	1	3	6		9	4	4	2	9	1		35823	Rhomboid-related protein 4 OS=Homo sapiens OX=9606 GN=RHBDD1 PE=1 SV=1
3428	TRUE	Q9H3M7|TXNIP_HUMAN	143.371	3	3	17	22		9	11	11	1.29412	9	1	Oxidation (M)	43661.4	Thioredoxin-interacting protein OS=Homo sapiens OX=9606 GN=TXNIP PE=1 SV=1
3296	TRUE	Q5JSP0|FGD3_HUMAN	150.145	3	3	8	9	1	8	9	9	1.125	8	1	Carbamidomethylation	79400.8	FYVE, RhoGEF and PH domain-containing protein 3 OS=Homo sapiens OX=9606 GN=FGD3 PE=1 SV=1
4919	TRUE	Q5T0B9|ZN362_HUMAN	75.1515	1	1	6	6		8		1	1	8	1		45814.5	Zinc finger protein 362 OS=Homo sapiens OX=9606 GN=ZNF362 PE=1 SV=1
3973	TRUE	Q9BX59|TPSNR_HUMAN	118.878	4	4	2	11		7	11	11	5.5	7	1	Carbamidomethylation; Oxidation (M)	50183.1	Tapasin-related protein OS=Homo sapiens OX=9606 GN=TAPBPL PE=1 SV=2
4036	TRUE	P08579|RU2B_HUMAN	116.535	3	3	5	7		7	5	5	1.4	7	1		25486.3	U2 small nuclear ribonucleoprotein B'' OS=Homo sapiens OX=9606 GN=SNRPB2 PE=1 SV=1
4484	TRUE	P08637|FCG3A_HUMAN	94.7645	2	2	5	5		7	10	10	1	7	1		29089.1	Low affinity immunoglobulin gamma Fc region receptor III-A OS=Homo sapiens OX=9606 GN=FCGR3A PE=1 SV=2
5531	TRUE	Q14314|FGL2_HUMAN	50.3202	1	1	1			6	2	2	1	6	1	Oxidation (M)	50228.6	Fibroleukin OS=Homo sapiens OX=9606 GN=FGL2 PE=1 SV=1
3737	TRUE	O00462|MANBA_HUMAN	129.925	4	4	6			6	21	21	0.166667	6	1		100895	Beta-mannosidase OS=Homo sapiens OX=9606 GN=MANBA PE=1 SV=3
4372	TRUE	Q9BW83|IFT27_HUMAN	100.143	2	2	5		2	11	10	10	0.2	5.5	1	Carbamidomethylation	20480.5	Intraflagellar transport protein 27 homolog OS=Homo sapiens OX=9606 GN=IFT27 PE=1 SV=1
3564	TRUE	Q8N1F8|S11IP_HUMAN	137.777	5	5	5	6	1	5	5	5	1.2	5	1	Oxidation (M); Carbamidomethylation	120259	Serine/threonine-protein kinase 11-interacting protein OS=Homo sapiens OX=9606 GN=STK11IP PE=1 SV=4
3749	TRUE	Q00403|TF2B_HUMAN	129.357	3	3	9	7		5	5	5	0.777778	5	1		34832.9	Transcription initiation factor IIB OS=Homo sapiens OX=9606 GN=GTF2B PE=1 SV=1
1648	TRUE	P29728|OAS2_HUMAN	233.968	10	10	6	25	5	24	33	33	4.16667	4.8	1	Carbamidomethylation	82430.6	2'-5'-oligoadenylate synthase 2 OS=Homo sapiens OX=9606 GN=OAS2 PE=1 SV=3
3427	TRUE	P50281|MMP14_HUMAN	143.432	6	6		10		4	12	12	10	4	1	Oxidation (M)	65893.9	Matrix metalloproteinase-14 OS=Homo sapiens OX=9606 GN=MMP14 PE=1 SV=3
4560	TRUE	P05162|LEG2_HUMAN	91.1334	1	1		6		4	3	3	6	4	1		14644.4	Galectin-2 OS=Homo sapiens OX=9606 GN=LGALS2 PE=1 SV=3
3774	TRUE	Q9GZN7|ROGDI_HUMAN	127.858	4	4	7	17		4	7	7	2.42857	4	1	Carbamidomethylation	32254.2	Protein rogdi homolog OS=Homo sapiens OX=9606 GN=ROGDI PE=1 SV=1
5217	TRUE	O95989|NUDT3_HUMAN	62.7963	1	1	2	3	1	4	2	2	1.5	4	1		19471	Diphosphoinositol polyphosphate phosphohydrolase 1 OS=Homo sapiens OX=9606 GN=NUDT3 PE=1 SV=1
1787	FALSE	O60907|TBL1X_HUMAN	140.277	3	3	1	1		4	15	15	1	4	1		62495.7	F-box-like/WD repeat-containing protein TBL1X OS=Homo sapiens OX=9606 GN=TBL1X PE=1 SV=3
4206	TRUE	Q8NB16|MLKL_HUMAN	108.661	3	3	9	5	1	4	5	5	0.555556	4	1	Carbamidomethylation; Oxidation (M)	54479.1	Mixed lineage kinase domain-like protein OS=Homo sapiens OX=9606 GN=MLKL PE=1 SV=1
4546	TRUE	Q3KQZ1|S2535_HUMAN	91.7694	2	2	4	2	1	4	1		0.5	4	1		32437.7	Solute carrier family 25 member 35 OS=Homo sapiens OX=9606 GN=SLC25A35 PE=1 SV=1
4539	TRUE	P0DI81|TPC2A_HUMAN	91.9877	2	2				4	8	8		4	1	Oxidation (M)	16444.7	Trafficking protein particle complex subunit 2 OS=Homo sapiens OX=9606 GN=TRAPPC2 PE=1 SV=1
4539	TRUE	P0DI82|TPC2B_HUMAN	91.9877	2	2				4	8	8		4	1	Oxidation (M)	16444.7	Trafficking protein particle complex subunit 2B OS=Homo sapiens OX=9606 GN=TRAPPC2B PE=1 SV=1
2735	TRUE	Q6P4E1|GOLM2_HUMAN	179.334	6	6	10	9	2	7	14	14	0.9	3.5	1		49497.8	Protein GOLM2 OS=Homo sapiens OX=9606 GN=GOLM2 PE=1 SV=2
568	FALSE	Q92901|RL3L_HUMAN	103.979	2	2		2	1	3	1		2	3	1	Carbamidomethylation	46296	60S ribosomal protein L3-like OS=Homo sapiens OX=9606 GN=RPL3L PE=2 SV=3
3478	TRUE	P23743|DGKA_HUMAN	141.561	3	2	11	20		3	12	12	1.81818	3	1		82630.2	Diacylglycerol kinase alpha OS=Homo sapiens OX=9606 GN=DGKA PE=1 SV=3
3987	TRUE	Q13315|ATM_HUMAN	118.434	5	5	6	8		3	10	10	1.33333	3	1	Carbamidomethylation	350687	Serine-protein kinase ATM OS=Homo sapiens OX=9606 GN=ATM PE=1 SV=4
3207	TRUE	Q96JQ2|CLMN_HUMAN	155.091	7	7	10	12	1	3	1	1	1.2	3	1		111651	Calmin OS=Homo sapiens OX=9606 GN=CLMN PE=1 SV=1
4800	TRUE	P15529|MCP_HUMAN	80.2914	2	2	1			3		1	1	3	1	Carbamidomethylation	43747.3	Membrane cofactor protein OS=Homo sapiens OX=9606 GN=CD46 PE=1 SV=3
4809	TRUE	Q9H061|T126A_HUMAN	80.0072	2	2	4	4	2	6	3	3	1	3	1		21527.2	Transmembrane protein 126A OS=Homo sapiens OX=9606 GN=TMEM126A PE=1 SV=1
3626	TRUE	O94885|SASH1_HUMAN	134.914	3	2	7	7		3	5	5	1	3	1		136653	SAM and SH3 domain-containing protein 1 OS=Homo sapiens OX=9606 GN=SASH1 PE=1 SV=3
4095	TRUE	Q7Z569|BRAP_HUMAN	114.134	4	4	12	8		3	7	7	0.666667	3	1	Carbamidomethylation	67304.6	BRCA1-associated protein OS=Homo sapiens OX=9606 GN=BRAP PE=1 SV=2
3835	TRUE	P52756|RBM5_HUMAN	125.262	3	3	9	5	1	3	9	9	0.555556	3	1	Carbamidomethylation	92153.8	RNA-binding protein 5 OS=Homo sapiens OX=9606 GN=RBM5 PE=1 SV=2
4925	TRUE	Q15596|NCOA2_HUMAN	74.8828	2	2	2			3		1	0.5	3	1		159157	Nuclear receptor coactivator 2 OS=Homo sapiens OX=9606 GN=NCOA2 PE=1 SV=2
5673	TRUE	Q9UIS9|MBD1_HUMAN	43.2948	1	1	2			3	1	1	0.5	3	1		66607.1	Methyl-CpG-binding domain protein 1 OS=Homo sapiens OX=9606 GN=MBD1 PE=1 SV=2
5147	TRUE	Q9UHB4|NDOR1_HUMAN	66.0239	1	1	2			3	2	2	0.5	3	1		66762.6	NADPH-dependent diflavin oxidoreductase 1 OS=Homo sapiens OX=9606 GN=NDOR1 PE=1 SV=1
5910	TRUE	Q96LI6|HSFY1_HUMAN	31.5596	1	1				3	2	2		3	1		45106.8	Heat shock transcription factor, Y-linked OS=Homo sapiens OX=9606 GN=HSFY1 PE=1 SV=1
5195	TRUE	Q8IWT0|ARCH_HUMAN	63.9426	1	1			1	3	3	3		3	1		19490.8	Protein archease OS=Homo sapiens OX=9606 GN=ZBTB8OS PE=1 SV=2
4132	TRUE	B7ZAP0|RBG10_HUMAN	112.43	3	1			1	3	7	7		3	1	Oxidation (M)	29037.9	Rab GTPase-activating protein 1-like, isoform 10 OS=Homo sapiens OX=9606 GN=RABGAP1L PE=1 SV=1
3546	TRUE	Q9UMY4|SNX12_HUMAN	138.257	5	4	9	7	3	8	11	11	0.777778	2.66667	1	Carbamidomethylation; Oxidation (M)	18884.5	Sorting nexin-12 OS=Homo sapiens OX=9606 GN=SNX12 PE=1 SV=4
4631	TRUE	Q70IA6|MOB2_HUMAN	87.9752	3	3	2	3	2	5	4	4	1.5	2.5	1	Carbamidomethylation	26926.6	MOB kinase activator 2 OS=Homo sapiens OX=9606 GN=MOB2 PE=1 SV=1
4098	TRUE	Q86W42|THOC6_HUMAN	113.946	3	3	10	6	2	5	12	12	0.6	2.5	1	Carbamidomethylation	37534.9	THO complex subunit 6 homolog OS=Homo sapiens OX=9606 GN=THOC6 PE=1 SV=1
[truncated: 4,327 more rows]

## Sheet: Table 2
Protein Group	Top	Accession	-10LgP	#Peptides	#Unique	#Spec D6_US_WP	#Spec D6_S_WP	#Spec D5_US_WP	#Spec D5_S_WP	#Spec D4_US_WP	#Spec D4_S_WP	S_Sum	US_Sum	S/US	PTM	Average Mass	Description
7	TRUE	P60709|ACTB_HUMAN	609.979	154	2	8420	8692	11238	10825	12057	13162	32679	31715	1.0304	Oxidation (M); Carbamidomethylation	41736.7	Actin, cytoplasmic 1 OS=Homo sapiens OX=9606 GN=ACTB PE=1 SV=1
8	TRUE	P63261|ACTG_HUMAN	609.296	153	2	8421	8685	11230	10828	12058	13153	32666	31709	1.03018	Oxidation (M); Carbamidomethylation	41792.8	Actin, cytoplasmic 2 OS=Homo sapiens OX=9606 GN=ACTG1 PE=1 SV=1
2	TRUE	P08670|VIME_HUMAN	709.752	218	195	8601	8466	6928	7202	7911	6408	22076	23440	0.941809	Oxidation (M); Carbamidomethylation	53651.7	Vimentin OS=Homo sapiens OX=9606 GN=VIM PE=1 SV=4
1	TRUE	P21333|FLNA_HUMAN	755.293	263	255	4617	4403	4262	3633	4947	3783	11819	13826	0.854839	Carbamidomethylation; Oxidation (M)	280739	Filamin-A OS=Homo sapiens OX=9606 GN=FLNA PE=1 SV=4
69	TRUE	Q6S8J3|POTEE_HUMAN	442.79	55	1	2395	2456	4967	5419	5671	6484	14359	13033	1.10174	Carbamidomethylation; Oxidation (M)	121363	POTE ankyrin domain family member E OS=Homo sapiens OX=9606 GN=POTEE PE=2 SV=3
3	TRUE	Q09666|AHNK_HUMAN	708.57	369	369	4943	4235	2942	2548	3597	2785	9568	11482	0.833304	Carbamidomethylation; Oxidation (M)	629101	Neuroblast differentiation-associated protein AHNAK OS=Homo sapiens OX=9606 GN=AHNAK PE=1 SV=2
15	TRUE	P06733|ENOA_HUMAN	535.544	73	65	3693	3633	3327	2936	3667	4107	10676	10687	0.998971	Oxidation (M); Carbamidomethylation	47169	Alpha-enolase OS=Homo sapiens OX=9606 GN=ENO1 PE=1 SV=2
41	TRUE	P04406|G3P_HUMAN	481.208	58	57	2686	2607	2293	1891	4815	4858	9356	9794	0.955279	Oxidation (M); Carbamidomethylation	36053.2	Glyceraldehyde-3-phosphate dehydrogenase OS=Homo sapiens OX=9606 GN=GAPDH PE=1 SV=3
5	TRUE	P35579|MYH9_HUMAN	649.992	172	151	3257	3099	2691	2610	2721	2430	8139	8669	0.938863	Carbamidomethylation; Oxidation (M)	226532	Myosin-9 OS=Homo sapiens OX=9606 GN=MYH9 PE=1 SV=4
67	TRUE	P68032|ACTC_HUMAN	445.499	74	1	2929	2996	1907	1705	2847	2827	7528	7683	0.979826	Oxidation (M); Carbamidomethylation	42019	Actin, alpha cardiac muscle 1 OS=Homo sapiens OX=9606 GN=ACTC1 PE=1 SV=1
10	TRUE	P13796|PLSL_HUMAN	572.795	98	88	2386	2304	2577	2110	2638	2326	6740	7601	0.886725	Carbamidomethylation; Oxidation (M)	70288.4	Plastin-2 OS=Homo sapiens OX=9606 GN=LCP1 PE=1 SV=6
11	TRUE	P14618|KPYM_HUMAN	562.401	78	78	1631	1572	2540	2332	3203	3206	7110	7374	0.964199	Carbamidomethylation; Oxidation (M)	57936.9	Pyruvate kinase PKM OS=Homo sapiens OX=9606 GN=PKM PE=1 SV=4
74	TRUE	P68133|ACTS_HUMAN	439.07	70	1	2752	2810	1768	1597	2707	2634	7041	7227	0.974263	Oxidation (M); Carbamidomethylation	42051	Actin, alpha skeletal muscle OS=Homo sapiens OX=9606 GN=ACTA1 PE=1 SV=1
80	TRUE	P63267|ACTH_HUMAN	435.214	67	1	2721	2778	1569	1359	2204	2188	6325	6494	0.973976	Oxidation (M); Carbamidomethylation	41876.9	Actin, gamma-enteric smooth muscle OS=Homo sapiens OX=9606 GN=ACTG2 PE=1 SV=1
4	TRUE	Q9Y490|TLN1_HUMAN	656.997	168	158	2080	2198	1883	1981	2306	2318	6497	6269	1.03637	Oxidation (M); Carbamidomethylation	269767	Talin-1 OS=Homo sapiens OX=9606 GN=TLN1 PE=1 SV=3
14	TRUE	P11021|BIP_HUMAN	542.318	76	69	2334	2259	1339	1305	1936	1485	5049	5609	0.90016	Oxidation (M); Carbamidomethylation	72332.9	Endoplasmic reticulum chaperone BiP OS=Homo sapiens OX=9606 GN=HSPA5 PE=1 SV=2
16	TRUE	P27797|CALR_HUMAN	533.701	63	63	1785	1876	1334	1322	1724	1481	4679	4843	0.966137	Carbamidomethylation; Oxidation (M)	48141.6	Calreticulin OS=Homo sapiens OX=9606 GN=CALR PE=1 SV=1
17	TRUE	P11142|HSP7C_HUMAN	532.416	82	51	1634	1517	1583	1395	1579	1401	4313	4796	0.899291	Carbamidomethylation; Oxidation (M)	70898.1	Heat shock cognate 71 kDa protein OS=Homo sapiens OX=9606 GN=HSPA8 PE=1 SV=1
37	TRUE	P06576|ATPB_HUMAN	492.511	61	61	2036	1976	1282	1349	1463	1202	4527	4781	0.946873	Oxidation (M)	56559.9	ATP synthase subunit beta, mitochondrial OS=Homo sapiens OX=9606 GN=ATP5F1B PE=1 SV=3
48	TRUE	P04075|ALDOA_HUMAN	469.428	43	38	1450	1440	1609	1266	1358	1306	4012	4417	0.908309	Oxidation (M); Carbamidomethylation	39420	Fructose-bisphosphate aldolase A OS=Homo sapiens OX=9606 GN=ALDOA PE=1 SV=2
6	TRUE	Q15149|PLEC_HUMAN	630.119	271	264	1448	1227	1189	1082	1465	1024	3333	4102	0.81253	Carbamidomethylation; Oxidation (M)	531791	Plectin OS=Homo sapiens OX=9606 GN=PLEC PE=1 SV=3
40	TRUE	P68104|EF1A1_HUMAN	482.556	42	26	1433	1626	1256	1149	1337	1123	3898	4026	0.968207	Carbamidomethylation; Oxidation (M)	50140.9	Elongation factor 1-alpha 1 OS=Homo sapiens OX=9606 GN=EEF1A1 PE=1 SV=1
40	FALSE	Q5VTE0|EF1A3_HUMAN	466.457	35	22	1387	1588	1192	1095	1252	1041	3724	3831	0.97207	Carbamidomethylation; Oxidation (M)	50185	Putative elongation factor 1-alpha-like 3 OS=Homo sapiens OX=9606 GN=EEF1A1P5 PE=5 SV=1
9	TRUE	P46940|IQGA1_HUMAN	581.004	104	101	1471	1423	1060	1051	1290	1138	3612	3821	0.945302	Carbamidomethylation; Oxidation (M)	189252	Ras GTPase-activating-like protein IQGAP1 OS=Homo sapiens OX=9606 GN=IQGAP1 PE=1 SV=1
19	TRUE	P06396|GELS_HUMAN	526.837	71	70	1375	1446	1215	1154	1191	1065	3665	3781	0.96932	Oxidation (M); Carbamidomethylation	85697.5	Gelsolin OS=Homo sapiens OX=9606 GN=GSN PE=1 SV=1
22	TRUE	P14625|ENPL_HUMAN	520.423	58	53	1468	1484	876	896	1260	1025	3405	3604	0.944784	Oxidation (M); Carbamidomethylation	92468.9	Endoplasmin OS=Homo sapiens OX=9606 GN=HSP90B1 PE=1 SV=1
26	TRUE	P07900|HS90A_HUMAN	512.929	64	33	1142	1177	1109	1086	1339	1371	3634	3590	1.01226	Oxidation (M); Carbamidomethylation	84659.7	Heat shock protein HSP 90-alpha OS=Homo sapiens OX=9606 GN=HSP90AA1 PE=1 SV=5
20	TRUE	P07355|ANXA2_HUMAN	525.962	77	77	1319	1266	1185	979	1067	849	3094	3571	0.866424	Carbamidomethylation; Oxidation (M)	38604	Annexin A2 OS=Homo sapiens OX=9606 GN=ANXA2 PE=1 SV=2
44	TRUE	P10809|CH60_HUMAN	476.535	43	43	1415	1463	863	1023	1263	912	3398	3541	0.959616	Carbamidomethylation; Oxidation (M)	61054.6	60 kDa heat shock protein, mitochondrial OS=Homo sapiens OX=9606 GN=HSPD1 PE=1 SV=2
12	TRUE	P08238|HS90B_HUMAN	544.615	67	28	1087	1063	1114	1056	1307	1230	3349	3508	0.954675	Oxidation (M); Carbamidomethylation	83264.2	Heat shock protein HSP 90-beta OS=Homo sapiens OX=9606 GN=HSP90AB1 PE=1 SV=4
34	TRUE	P30101|PDIA3_HUMAN	497.974	59	58	1426	1509	730	946	1022	1006	3461	3178	1.08905	Carbamidomethylation; Oxidation (M)	56782.4	Protein disulfide-isomerase A3 OS=Homo sapiens OX=9606 GN=PDIA3 PE=1 SV=4
31	TRUE	P12814|ACTN1_HUMAN	504.355	67	45	1276	1107	977	782	915	712	2601	3168	0.821023	Oxidation (M); Carbamidomethylation	103058	Alpha-actinin-1 OS=Homo sapiens OX=9606 GN=ACTN1 PE=1 SV=2
42	TRUE	P38646|GRP75_HUMAN	478.75	62	52	1613	1548	738	729	734	575	2852	3085	0.924473	Carbamidomethylation; Oxidation (M)	73680.5	Stress-70 protein, mitochondrial OS=Homo sapiens OX=9606 GN=HSPA9 PE=1 SV=2
279	TRUE	P06702|S10A9_HUMAN	362.847	20	20	881	1053	970	1046	1182	1535	3634	3033	1.19815	Oxidation (M)	13242	Protein S100-A9 OS=Homo sapiens OX=9606 GN=S100A9 PE=1 SV=1
72	TRUE	P63104|1433Z_HUMAN	439.632	37	26	1297	1105	708	603	946	817	2525	2951	0.855642	Carbamidomethylation; Oxidation (M)	27745.1	14-3-3 protein zeta/delta OS=Homo sapiens OX=9606 GN=YWHAZ PE=1 SV=1
125	TRUE	P40121|CAPG_HUMAN	407.438	31	31	1016	940	1134	1000	785	724	2664	2935	0.907666	Carbamidomethylation; Oxidation (M)	38498.5	Macrophage-capping protein OS=Homo sapiens OX=9606 GN=CAPG PE=1 SV=2
28	TRUE	P07437|TBB5_HUMAN	510.895	49	11	1016	957	982	775	935	863	2595	2933	0.88476	Oxidation (M); Carbamidomethylation	49670.8	Tubulin beta chain OS=Homo sapiens OX=9606 GN=TUBB PE=1 SV=2
53	TRUE	P26038|MOES_HUMAN	461.404	44	37	1158	1131	754	782	982	953	2866	2894	0.990325	Oxidation (M); Carbamidomethylation	67820	Moesin OS=Homo sapiens OX=9606 GN=MSN PE=1 SV=3
142	TRUE	A5A3E0|POTEF_HUMAN	399.601	46	5	742	791	819	821	1191	1178	2790	2752	1.01381	Carbamidomethylation; Oxidation (M)	121445	POTE ankyrin domain family member F OS=Homo sapiens OX=9606 GN=POTEF PE=1 SV=2
70	TRUE	P00558|PGK1_HUMAN	442.172	39	30	1070	1090	883	818	792	826	2734	2745	0.995993	Carbamidomethylation; Oxidation (M)	44614.7	Phosphoglycerate kinase 1 OS=Homo sapiens OX=9606 GN=PGK1 PE=1 SV=3
491	TRUE	P31949|S10AB_HUMAN	329.874	15	15	905	846	788	823	1026	977	2646	2719	0.973152	Carbamidomethylation; Oxidation (M)	11740.4	Protein S100-A11 OS=Homo sapiens OX=9606 GN=S100A11 PE=1 SV=2
175	TRUE	Q9BYX7|ACTBM_HUMAN	388.223	39	6	772	771	824	836	1098	1092	2699	2694	1.00186	Oxidation (M); Carbamidomethylation	42016.2	Putative beta-actin-like protein 3 OS=Homo sapiens OX=9606 GN=POTEKP PE=5 SV=1
20	FALSE	A6NMY6|AXA2L_HUMAN	468.933	55	55	1065	1028	865	736	741	614	2378	2671	0.890303	Carbamidomethylation; Oxidation (M)	38659	Putative annexin A2-like protein OS=Homo sapiens OX=9606 GN=ANXA2P2 PE=5 SV=2
139	TRUE	Q562R1|ACTBL_HUMAN	401.066	51	14	917	1013	773	650	964	940	2603	2654	0.980784	Oxidation (M); Carbamidomethylation	42003.2	Beta-actin-like protein 2 OS=Homo sapiens OX=9606 GN=ACTBL2 PE=1 SV=2
62	TRUE	P08758|ANXA5_HUMAN	451.832	41	40	797	730	989	928	847	777	2435	2633	0.924801	Oxidation (M)	35936.8	Annexin A5 OS=Homo sapiens OX=9606 GN=ANXA5 PE=1 SV=2
30	TRUE	P68371|TBB4B_HUMAN	505.495	47	2	932	885	896	688	798	732	2305	2626	0.877761	Oxidation (M); Carbamidomethylation	49831	Tubulin beta-4B chain OS=Homo sapiens OX=9606 GN=TUBB4B PE=1 SV=1
43	TRUE	P07237|PDIA1_HUMAN	478.132	61	61	1230	1111	643	657	729	599	2367	2602	0.909685	Carbamidomethylation; Oxidation (M)	57116.4	Protein disulfide-isomerase OS=Homo sapiens OX=9606 GN=P4HB PE=1 SV=3
196	TRUE	P23528|COF1_HUMAN	382.329	25	19	891	870	730	695	942	897	2462	2563	0.960593	Carbamidomethylation	18502.5	Cofilin-1 OS=Homo sapiens OX=9606 GN=CFL1 PE=1 SV=3
52	TRUE	P25705|ATPA_HUMAN	461.425	40	40	1103	992	721	763	736	597	2352	2560	0.91875	Oxidation (M); Carbamidomethylation	59750.6	ATP synthase subunit alpha, mitochondrial OS=Homo sapiens OX=9606 GN=ATP5F1A PE=1 SV=1
49	TRUE	P13667|PDIA4_HUMAN	464.16	44	43	1108	1085	570	573	815	643	2301	2493	0.922984	Carbamidomethylation; Oxidation (M)	72932.5	Protein disulfide-isomerase A4 OS=Homo sapiens OX=9606 GN=PDIA4 PE=1 SV=2
13	TRUE	O75369|FLNB_HUMAN	542.388	112	104	747	692	670	455	951	747	1894	2368	0.799831	Oxidation (M); Carbamidomethylation	278164	Filamin-B OS=Homo sapiens OX=9606 GN=FLNB PE=1 SV=2
234	TRUE	P62937|PPIA_HUMAN	372.798	25	25	806	813	816	729	745	732	2274	2367	0.96071	Carbamidomethylation; Oxidation (M)	18012.5	Peptidyl-prolyl cis-trans isomerase A OS=Homo sapiens OX=9606 GN=PPIA PE=1 SV=2
1120	TRUE	Q14956|GPNMB_HUMAN	268.891	11	11	890	692	841	815	609	488	1995	2340	0.852564	Oxidation (M); Carbamidomethylation	63922.5	Transmembrane glycoprotein NMB OS=Homo sapiens OX=9606 GN=GPNMB PE=1 SV=2
46	TRUE	P13639|EF2_HUMAN	474.769	58	58	829	772	714	598	790	605	1975	2333	0.84655	Carbamidomethylation; Oxidation (M)	95338.1	Elongation factor 2 OS=Homo sapiens OX=9606 GN=EEF2 PE=1 SV=4
27	TRUE	Q9NZM1|MYOF_HUMAN	511.398	112	107	954	1094	578	800	696	707	2601	2228	1.16741	Carbamidomethylation; Oxidation (M)	234709	Myoferlin OS=Homo sapiens OX=9606 GN=MYOF PE=1 SV=1
24	TRUE	P33241|LSP1_HUMAN	518.576	52	52	719	542	792	647	700	556	1745	2211	0.789236	Carbamidomethylation; Oxidation (M)	37191.6	Lymphocyte-specific protein 1 OS=Homo sapiens OX=9606 GN=LSP1 PE=1 SV=1
90	TRUE	P52209|6PGD_HUMAN	429.891	35	35	806	798	599	660	770	832	2290	2175	1.05287	Carbamidomethylation; Oxidation (M)	53140	6-phosphogluconate dehydrogenase, decarboxylating OS=Homo sapiens OX=9606 GN=PGD PE=1 SV=3
38	TRUE	P04083|ANXA1_HUMAN	485.287	54	54	884	810	575	589	700	599	1998	2159	0.925428	Carbamidomethylation; Oxidation (M)	38714.2	Annexin A1 OS=Homo sapiens OX=9606 GN=ANXA1 PE=1 SV=2
165	TRUE	P31948|STIP1_HUMAN	391.233	34	34	885	888	535	417	646	483	1788	2066	0.86544	Carbamidomethylation; Oxidation (M)	62639.2	Stress-induced-phosphoprotein 1 OS=Homo sapiens OX=9606 GN=STIP1 PE=1 SV=1
109	TRUE	Q9BVA1|TBB2B_HUMAN	415.707	41	1	718	725	697	550	638	568	1843	2053	0.897711	Oxidation (M); Carbamidomethylation	49953.1	Tubulin beta-2B chain OS=Homo sapiens OX=9606 GN=TUBB2B PE=1 SV=1
115	TRUE	Q13885|TBB2A_HUMAN	412.108	39	1	722	728	682	550	633	567	1845	2037	0.905744	Oxidation (M); Carbamidomethylation	49907	Tubulin beta-2A chain OS=Homo sapiens OX=9606 GN=TUBB2A PE=1 SV=1
33	TRUE	O43707|ACTN4_HUMAN	500.19	62	39	805	742	583	533	622	597	1872	2010	0.931343	Oxidation (M); Carbamidomethylation	104854	Alpha-actinin-4 OS=Homo sapiens OX=9606 GN=ACTN4 PE=1 SV=2
100	TRUE	Q01518|CAP1_HUMAN	420.367	45	45	683	620	632	500	669	643	1763	1984	0.888609	Carbamidomethylation; Oxidation (M)	51901.5	Adenylyl cyclase-associated protein 1 OS=Homo sapiens OX=9606 GN=CAP1 PE=1 SV=5
57	TRUE	P40939|ECHA_HUMAN	455.414	39	39	861	802	540	548	580	573	1923	1981	0.970722	Oxidation (M); Carbamidomethylation	82999.6	Trifunctional enzyme subunit alpha, mitochondrial OS=Homo sapiens OX=9606 GN=HADHA PE=1 SV=2
18	TRUE	Q14204|DYHC1_HUMAN	527.701	147	147	622	666	561	628	729	758	2052	1912	1.07322	Oxidation (M); Carbamidomethylation	532408	Cytoplasmic dynein 1 heavy chain 1 OS=Homo sapiens OX=9606 GN=DYNC1H1 PE=1 SV=5
86	TRUE	P07858|CATB_HUMAN	433.621	26	26	556	401	629	878	715	728	2007	1900	1.05632	Oxidation (M); Carbamidomethylation	37821.6	Cathepsin B OS=Homo sapiens OX=9606 GN=CTSB PE=1 SV=3
25	TRUE	P23381|SYWC_HUMAN	517.428	55	55	772	1489	599	1796	526	2091	5376	1897	2.83395	Carbamidomethylation; Oxidation (M)	53165.4	Tryptophan--tRNA ligase, cytoplasmic OS=Homo sapiens OX=9606 GN=WARS1 PE=1 SV=2
39	TRUE	P04350|TBB4A_HUMAN	484.52	39	2	713	693	628	483	526	472	1648	1867	0.8827	Oxidation (M); Carbamidomethylation	49585.8	Tubulin beta-4A chain OS=Homo sapiens OX=9606 GN=TUBB4A PE=1 SV=2
21	TRUE	Q00610|CLH1_HUMAN	523.996	86	71	522	532	584	512	728	678	1722	1834	0.938931	Oxidation (M); Carbamidomethylation	191615	Clathrin heavy chain 1 OS=Homo sapiens OX=9606 GN=CLTC PE=1 SV=5
50	TRUE	P55072|TERA_HUMAN	462.466	54	53	597	546	559	586	658	604	1736	1814	0.957001	Carbamidomethylation; Oxidation (M)	89321.8	Transitional endoplasmic reticulum ATPase OS=Homo sapiens OX=9606 GN=VCP PE=1 SV=4
130	TRUE	P31946|1433B_HUMAN	405.302	25	16	815	693	407	365	577	593	1651	1799	0.917732	Oxidation (M); Carbamidomethylation	28082.4	14-3-3 protein beta/alpha OS=Homo sapiens OX=9606 GN=YWHAB PE=1 SV=3
88	TRUE	P21281|VATB2_HUMAN	433.349	38	38	620	614	487	544	676	572	1730	1783	0.970275	Oxidation (M); Carbamidomethylation	56500.7	V-type proton ATPase subunit B, brain isoform OS=Homo sapiens OX=9606 GN=ATP6V1B2 PE=1 SV=3
347	TRUE	P0CG39|POTEJ_HUMAN	351.167	31	2	386	411	531	550	855	853	1814	1772	1.0237	Carbamidomethylation; Oxidation (M)	117390	POTE ankyrin domain family member J OS=Homo sapiens OX=9606 GN=POTEJ PE=3 SV=1
311	TRUE	P0CG38|POTEI_HUMAN	357.015	34	2	401	422	524	549	841	832	1803	1766	1.02095	Carbamidomethylation; Oxidation (M)	121282	POTE ankyrin domain family member I OS=Homo sapiens OX=9606 GN=POTEI PE=3 SV=1
185	TRUE	Q13509|TBB3_HUMAN	385.216	31	6	682	664	533	396	548	462	1522	1763	0.863301	Oxidation (M); Carbamidomethylation	50432.7	Tubulin beta-3 chain OS=Homo sapiens OX=9606 GN=TUBB3 PE=1 SV=2
87	TRUE	Q9Y4L1|HYOU1_HUMAN	433.571	43	43	688	570	421	519	653	524	1613	1762	0.915437	Oxidation (M); Carbamidomethylation	111335	Hypoxia up-regulated protein 1 OS=Homo sapiens OX=9606 GN=HYOU1 PE=1 SV=1
85	TRUE	Q9BQE3|TBA1C_HUMAN	433.641	42	3	602	591	562	523	537	514	1628	1701	0.957084	Oxidation (M); Carbamidomethylation	49895.3	Tubulin alpha-1C chain OS=Homo sapiens OX=9606 GN=TUBA1C PE=1 SV=1
171	TRUE	P42765|THIM_HUMAN	389.477	23	23	662	601	596	545	429	391	1537	1687	0.911085	Oxidation (M); Carbamidomethylation	41924.2	3-ketoacyl-CoA thiolase, mitochondrial OS=Homo sapiens OX=9606 GN=ACAA2 PE=1 SV=2
259	TRUE	P18669|PGAM1_HUMAN	368.22	18	13	703	650	500	464	483	489	1603	1686	0.950771	Carbamidomethylation; Oxidation (M)	28803.9	Phosphoglycerate mutase 1 OS=Homo sapiens OX=9606 GN=PGAM1 PE=1 SV=2
218	TRUE	P07339|CATD_HUMAN	377.58	22	22	603	476	542	456	509	503	1435	1654	0.867594	Carbamidomethylation; Oxidation (M)	44552.2	Cathepsin D OS=Homo sapiens OX=9606 GN=CTSD PE=1 SV=1
65	TRUE	P50395|GDIB_HUMAN	448.423	43	32	613	682	488	532	547	567	1781	1648	1.0807	Carbamidomethylation; Oxidation (M)	50663.2	Rab GDP dissociation inhibitor beta OS=Homo sapiens OX=9606 GN=GDI2 PE=1 SV=2
509	TRUE	P60660|MYL6_HUMAN	328.506	17	16	700	605	451	331	449	331	1267	1600	0.791875	Oxidation (M); Carbamidomethylation	16930	Myosin light polypeptide 6 OS=Homo sapiens OX=9606 GN=MYL6 PE=1 SV=2
723	TRUE	P15090|FABP4_HUMAN	302.308	13	10	607	522	384	326	596	493	1341	1587	0.844991	Oxidation (M)	14718.9	Fatty acid-binding protein, adipocyte OS=Homo sapiens OX=9606 GN=FABP4 PE=1 SV=3
92	TRUE	P05023|AT1A1_HUMAN	429.419	42	36	727	756	375	355	455	382	1493	1557	0.958895	Carbamidomethylation; Oxidation (M)	112896	Sodium/potassium-transporting ATPase subunit alpha-1 OS=Homo sapiens OX=9606 GN=ATP1A1 PE=1 SV=1
35	TRUE	O75083|WDR1_HUMAN	495.371	34	34	491	497	428	407	612	569	1473	1531	0.962116	Carbamidomethylation; Oxidation (M)	66193.5	WD repeat-containing protein 1 OS=Homo sapiens OX=9606 GN=WDR1 PE=1 SV=4
238	TRUE	Q01469|FABP5_HUMAN	372.487	25	11	534	530	455	398	539	585	1513	1528	0.990183	Carbamidomethylation; Oxidation (M)	15164.4	Fatty acid-binding protein 5 OS=Homo sapiens OX=9606 GN=FABP5 PE=1 SV=3
45	TRUE	P27824|CALX_HUMAN	476.106	46	46	561	593	461	426	468	425	1444	1490	0.969128	Carbamidomethylation; Oxidation (M)	67568.3	Calnexin OS=Homo sapiens OX=9606 GN=CANX PE=1 SV=2
54	TRUE	P0DMV8|HS71A_HUMAN	457.404	61	25	476	474	502	451	499	473	1398	1477	0.946513	Carbamidomethylation; Oxidation (M)	70052.2	Heat shock 70 kDa protein 1A OS=Homo sapiens OX=9606 GN=HSPA1A PE=1 SV=1
54	TRUE	P0DMV9|HS71B_HUMAN	457.404	61	25	476	474	502	451	499	473	1398	1477	0.946513	Carbamidomethylation; Oxidation (M)	70052.2	Heat shock 70 kDa protein 1B OS=Homo sapiens OX=9606 GN=HSPA1B PE=1 SV=1
51	TRUE	P22314|UBA1_HUMAN	461.591	53	53	543	521	425	431	500	475	1427	1468	0.972071	Carbamidomethylation; Oxidation (M)	117849	Ubiquitin-like modifier-activating enzyme 1 OS=Homo sapiens OX=9606 GN=UBA1 PE=1 SV=3
565	TRUE	P61981|1433G_HUMAN	320.48	16	11	715	586	299	254	415	400	1240	1429	0.86774	Oxidation (M); Carbamidomethylation	28302.6	14-3-3 protein gamma OS=Homo sapiens OX=9606 GN=YWHAG PE=1 SV=2
120	TRUE	P38606|VATA_HUMAN	411.333	42	42	561	504	404	470	456	437	1411	1421	0.992963	Carbamidomethylation; Oxidation (M)	68304.1	V-type proton ATPase catalytic subunit A OS=Homo sapiens OX=9606 GN=ATP6V1A PE=1 SV=2
78	TRUE	P04179|SODM_HUMAN	435.925	31	31	501	699	474	1002	430	905	2606	1405	1.8548	Carbamidomethylation; Oxidation (M)	24750.1	Superoxide dismutase [Mn], mitochondrial OS=Homo sapiens OX=9606 GN=SOD2 PE=1 SV=3
1613	TRUE	P41219|PERI_HUMAN	235.838	13	1	522	540	385	426	477	392	1358	1384	0.981214	Oxidation (M)	53650.9	Peripherin OS=Homo sapiens OX=9606 GN=PRPH PE=1 SV=2
61	TRUE	Q96KP4|CNDP2_HUMAN	451.926	38	38	444	490	486	550	449	625	1665	1379	1.2074	Oxidation (M); Carbamidomethylation	52878.5	Cytosolic non-specific dipeptidase OS=Homo sapiens OX=9606 GN=CNDP2 PE=1 SV=2
29	TRUE	Q9UPN3|MACF1_HUMAN	509.795	165	162	500	591	332	416	544	536	1543	1376	1.12137	Oxidation (M); Carbamidomethylation	838308	Microtubule-actin cross-linking factor 1, isoforms 1/2/3/5 OS=Homo sapiens OX=9606 GN=MACF1 PE=1 SV=4
58	TRUE	Q14764|MVP_HUMAN	454.95	51	51	559	600	364	436	444	407	1443	1367	1.0556	Oxidation (M); Carbamidomethylation	99326.9	Major vault protein OS=Homo sapiens OX=9606 GN=MVP PE=1 SV=4
66	TRUE	Q99798|ACON_HUMAN	447.177	45	45	590	626	364	406	399	359	1391	1353	1.02809	Carbamidomethylation; Oxidation (M)	85425.4	Aconitate hydratase, mitochondrial OS=Homo sapiens OX=9606 GN=ACO2 PE=1 SV=2
32	TRUE	Q13576|IQGA2_HUMAN	503.378	77	75	426	426	408	466	517	515	1407	1351	1.04145	Carbamidomethylation; Oxidation (M)	180578	Ras GTPase-activating-like protein IQGAP2 OS=Homo sapiens OX=9606 GN=IQGAP2 PE=1 SV=4
108	TRUE	P60174|TPIS_HUMAN	415.83	29	29	499	513	402	409	449	453	1375	1350	1.01852	Carbamidomethylation; Oxidation (M)	26669.5	Triosephosphate isomerase OS=Homo sapiens OX=9606 GN=TPI1 PE=1 SV=4
89	TRUE	Q9Y3Z3|SAMH1_HUMAN	430.861	40	40	540	595	333	347	466	508	1450	1339	1.0829	Oxidation (M); Carbamidomethylation	72200.5	Deoxynucleoside triphosphate triphosphohydrolase SAMHD1 OS=Homo sapiens OX=9606 GN=SAMHD1 PE=1 SV=2
200	TRUE	P34931|HS71L_HUMAN	381.799	37	1	472	484	423	379	415	386	1249	1310	0.953435	Oxidation (M); Carbamidomethylation	70375.1	Heat shock 70 kDa protein 1-like OS=Homo sapiens OX=9606 GN=HSPA1L PE=1 SV=2
172	TRUE	P68366|TBA4A_HUMAN	389.245	31	5	441	446	419	390	443	408	1244	1303	0.95472	Oxidation (M); Carbamidomethylation	49924.4	Tubulin alpha-4A chain OS=Homo sapiens OX=9606 GN=TUBA4A PE=1 SV=1
23	TRUE	Q13813|SPTN1_HUMAN	519.588	121	121	550	472	421	359	321	187	1018	1292	0.787926	Carbamidomethylation; Oxidation (M)	284539	Spectrin alpha chain, non-erythrocytic 1 OS=Homo sapiens OX=9606 GN=SPTAN1 PE=1 SV=3
79	TRUE	Q86UX7|URP2_HUMAN	435.351	38	38	382	352	468	424	437	403	1179	1287	0.916084	Carbamidomethylation; Oxidation (M)	75952.8	Fermitin family homolog 3 OS=Homo sapiens OX=9606 GN=FERMT3 PE=1 SV=1
429	TRUE	Q16777|H2A2C_HUMAN	337.405	22	4	554	572	423	397	294	310	1279	1271	1.00629	Oxidation (M)	13988.4	Histone H2A type 2-C OS=Homo sapiens OX=9606 GN=H2AC20 PE=1 SV=4
429	TRUE	Q6FI13|H2A2A_HUMAN	337.405	22	4	554	572	423	397	294	310	1279	1271	1.00629	Oxidation (M)	14095.5	Histone H2A type 2-A OS=Homo sapiens OX=9606 GN=H2AC18 PE=1 SV=3
212	TRUE	Q06830|PRDX1_HUMAN	378.802	24	21	534	583	394	392	320	338	1313	1248	1.05208	Oxidation (M); Carbamidomethylation	22110.4	Peroxiredoxin-1 OS=Homo sapiens OX=9606 GN=PRDX1 PE=1 SV=1
59	TRUE	P51659|DHB4_HUMAN	453.105	38	38	473	445	418	394	342	271	1110	1233	0.900243	Carbamidomethylation; Oxidation (M)	79686.4	Peroxisomal multifunctional enzyme type 2 OS=Homo sapiens OX=9606 GN=HSD17B4 PE=1 SV=3
73	TRUE	P05107|ITB2_HUMAN	439.18	47	47	527	471	287	308	415	328	1107	1229	0.900732	Carbamidomethylation; Oxidation (M)	84781.8	Integrin beta-2 OS=Homo sapiens OX=9606 GN=ITGB2 PE=1 SV=2
56	TRUE	Q68CZ2|TENS3_HUMAN	455.594	45	43	364	323	454	408	404	413	1144	1222	0.93617	Carbamidomethylation; Oxidation (M)	155266	Tensin-3 OS=Homo sapiens OX=9606 GN=TNS3 PE=1 SV=2
136	TRUE	P09467|F16P1_HUMAN	401.812	32	31	550	479	362	324	292	271	1074	1204	0.892027	Carbamidomethylation; Oxidation (M)	36842.5	Fructose-1,6-bisphosphatase 1 OS=Homo sapiens OX=9606 GN=FBP1 PE=1 SV=5
47	TRUE	Q9P2E9|RRBP1_HUMAN	474.131	56	55	445	438	356	317	392	338	1093	1193	0.916178	Oxidation (M); Carbamidomethylation	152456	Ribosome-binding protein 1 OS=Homo sapiens OX=9606 GN=RRBP1 PE=1 SV=5
289	TRUE	P60842|IF4A1_HUMAN	359.9	27	20	438	370	347	281	402	312	963	1187	0.811289	Oxidation (M); Carbamidomethylation	46153.9	Eukaryotic initiation factor 4A-I OS=Homo sapiens OX=9606 GN=EIF4A1 PE=1 SV=1
356	TRUE	Q13510|ASAH1_HUMAN	349.067	22	22	440	377	354	344	389	402	1123	1183	0.949281	Carbamidomethylation; Oxidation (M)	44659.6	Acid ceramidase OS=Homo sapiens OX=9606 GN=ASAH1 PE=1 SV=5
590	TRUE	Q14568|HS902_HUMAN	316.935	17	1	392	386	368	356	409	394	1136	1169	0.971771	Oxidation (M); Carbamidomethylation	39364.8	Heat shock protein HSP 90-alpha A2 OS=Homo sapiens OX=9606 GN=HSP90AA2P PE=1 SV=2
126	TRUE	P54652|HSP72_HUMAN	407.342	34	4	376	390	340	312	450	454	1156	1166	0.991424	Carbamidomethylation; Oxidation (M)	70021	Heat shock-related 70 kDa protein 2 OS=Homo sapiens OX=9606 GN=HSPA2 PE=1 SV=1
372	TRUE	P07737|PROF1_HUMAN	346.578	20	20	451	433	274	303	417	431	1167	1142	1.02189	Oxidation (M); Carbamidomethylation	15054.2	Profilin-1 OS=Homo sapiens OX=9606 GN=PFN1 PE=1 SV=2
280	TRUE	P52907|CAZA1_HUMAN	362.775	18	15	454	456	315	307	371	346	1109	1140	0.972807	Carbamidomethylation; Oxidation (M)	32922.8	F-actin-capping protein subunit alpha-1 OS=Homo sapiens OX=9606 GN=CAPZA1 PE=1 SV=3
105	TRUE	P21980|TGM2_HUMAN	416.976	32	32	346	302	350	317	443	350	969	1139	0.850746	Carbamidomethylation; Oxidation (M)	77328.8	Protein-glutamine gamma-glutamyltransferase 2 OS=Homo sapiens OX=9606 GN=TGM2 PE=1 SV=2
240	TRUE	P67936|TPM4_HUMAN	372.371	29	14	480	385	311	297	344	323	1005	1135	0.885463	Carbamidomethylation; Oxidation (M)	28521.8	Tropomyosin alpha-4 chain OS=Homo sapiens OX=9606 GN=TPM4 PE=1 SV=3
113	TRUE	P18206|VINC_HUMAN	413.041	48	48	329	318	426	367	376	330	1015	1131	0.897436	Oxidation (M); Carbamidomethylation	123799	Vinculin OS=Homo sapiens OX=9606 GN=VCL PE=1 SV=4
206	TRUE	O75874|IDHC_HUMAN	380.495	25	24	439	503	337	354	353	557	1414	1129	1.25244	Oxidation (M); Carbamidomethylation	46659.3	Isocitrate dehydrogenase [NADP] cytoplasmic OS=Homo sapiens OX=9606 GN=IDH1 PE=1 SV=2
326	TRUE	Q8IUE6|H2A2B_HUMAN	355.28	24	1	505	536	362	367	250	270	1173	1117	1.05013		13995.3	Histone H2A type 2-B OS=Homo sapiens OX=9606 GN=H2AC21 PE=1 SV=3
81	TRUE	P28838|AMPL_HUMAN	435.115	43	43	377	662	349	705	383	928	2295	1109	2.06943	Oxidation (M); Carbamidomethylation	56166.3	Cytosol aminopeptidase OS=Homo sapiens OX=9606 GN=LAP3 PE=1 SV=3
323	TRUE	P62258|1433E_HUMAN	355.815	17	15	454	388	263	254	383	423	1065	1100	0.968182	Oxidation (M); Carbamidomethylation	29173.9	14-3-3 protein epsilon OS=Homo sapiens OX=9606 GN=YWHAE PE=1 SV=1
170	TRUE	Q15942|ZYX_HUMAN	389.533	22	22	285	292	425	397	386	344	1033	1096	0.942518	Carbamidomethylation; Oxidation (M)	61277.3	Zyxin OS=Homo sapiens OX=9606 GN=ZYX PE=1 SV=1
494	TRUE	P61160|ARP2_HUMAN	329.75	19	19	338	356	347	282	400	406	1044	1085	0.962212	Oxidation (M); Carbamidomethylation	44760.8	Actin-related protein 2 OS=Homo sapiens OX=9606 GN=ACTR2 PE=1 SV=1
133	TRUE	P29350|PTN6_HUMAN	404.27	35	35	416	357	345	387	316	364	1108	1077	1.02878	Carbamidomethylation; Oxidation (M)	67561.1	Tyrosine-protein phosphatase non-receptor type 6 OS=Homo sapiens OX=9606 GN=PTPN6 PE=1 SV=1
36	TRUE	Q01082|SPTB2_HUMAN	492.728	96	93	439	428	337	304	283	206	938	1059	0.885741	Carbamidomethylation; Oxidation (M)	274609	Spectrin beta chain, non-erythrocytic 1 OS=Homo sapiens OX=9606 GN=SPTBN1 PE=1 SV=2
637	TRUE	P62820|RAB1A_HUMAN	311.91	14	4	527	565	264	325	264	266	1156	1055	1.09573	Carbamidomethylation; Oxidation (M)	22677.7	Ras-related protein Rab-1A OS=Homo sapiens OX=9606 GN=RAB1A PE=1 SV=3
288	TRUE	P27348|1433T_HUMAN	359.973	24	17	492	475	219	215	341	296	986	1052	0.937262	Carbamidomethylation; Oxidation (M)	27764.2	14-3-3 protein theta OS=Homo sapiens OX=9606 GN=YWHAQ PE=1 SV=1
412	TRUE	P17931|LEG3_HUMAN	339.513	28	27	517	469	242	229	285	290	988	1044	0.94636	Oxidation (M)	26152.3	Galectin-3 OS=Homo sapiens OX=9606 GN=LGALS3 PE=1 SV=5
1296	TRUE	P07108|ACBP_HUMAN	255.83	8	8	381	318	440	311	208	192	821	1029	0.797862	Oxidation (M)	10044.4	Acyl-CoA-binding protein OS=Homo sapiens OX=9606 GN=DBI PE=1 SV=2
276	TRUE	P52566|GDIR2_HUMAN	363.727	16	16	337	344	319	307	366	351	1002	1022	0.980431	Oxidation (M); Carbamidomethylation	22988	Rho GDP-dissociation inhibitor 2 OS=Homo sapiens OX=9606 GN=ARHGDIB PE=1 SV=3
98	TRUE	P42704|LPPRC_HUMAN	422.066	62	62	425	393	252	264	329	236	893	1006	0.887674	Oxidation (M); Carbamidomethylation	157905	Leucine-rich PPR motif-containing protein, mitochondrial OS=Homo sapiens OX=9606 GN=LRPPRC PE=1 SV=3
60	TRUE	P02545|LMNA_HUMAN	452.926	51	51	338	328	387	336	281	218	882	1006	0.87674	Carbamidomethylation; Oxidation (M)	74139.5	Prelamin-A/C OS=Homo sapiens OX=9606 GN=LMNA PE=1 SV=1
103	TRUE	P22626|ROA2_HUMAN	418.833	31	31	302	314	449	347	245	207	868	996	0.871486	Oxidation (M); Carbamidomethylation	37429.7	Heterogeneous nuclear ribonucleoproteins A2/B1 OS=Homo sapiens OX=9606 GN=HNRNPA2B1 PE=1 SV=2
12	FALSE	Q58FF8|H90B2_HUMAN	303.764	14	2	361	335	309	315	324	300	950	994	0.955734	Oxidation (M)	44348.9	Putative heat shock protein HSP 90-beta 2 OS=Homo sapiens OX=9606 GN=HSP90AB2P PE=1 SV=2
1078	TRUE	Q9Y281|COF2_HUMAN	271.899	9	3	316	293	281	274	396	337	904	993	0.910373	Carbamidomethylation	18736.6	Cofilin-2 OS=Homo sapiens OX=9606 GN=CFL2 PE=1 SV=1
131	TRUE	P11586|C1TC_HUMAN	404.849	43	41	367	369	324	406	301	301	1076	992	1.08468	Oxidation (M); Carbamidomethylation	101559	C-1-tetrahydrofolate synthase, cytoplasmic OS=Homo sapiens OX=9606 GN=MTHFD1 PE=1 SV=3
266	TRUE	P30041|PRDX6_HUMAN	366.63	25	25	438	367	304	249	247	217	833	989	0.842265	Carbamidomethylation; Oxidation (M)	25035	Peroxiredoxin-6 OS=Homo sapiens OX=9606 GN=PRDX6 PE=1 SV=3
242	TRUE	P07954|FUMH_HUMAN	371.499	19	19	436	366	269	241	272	201	808	977	0.827021	Oxidation (M); Carbamidomethylation	54637	Fumarate hydratase, mitochondrial OS=Homo sapiens OX=9606 GN=FH PE=1 SV=3
263	TRUE	P21796|VDAC1_HUMAN	367.423	21	20	385	400	288	304	299	279	983	972	1.01132	Carbamidomethylation; Oxidation (M)	30772.6	Voltage-dependent anion-selective channel protein 1 OS=Homo sapiens OX=9606 GN=VDAC1 PE=1 SV=2
75	TRUE	P29401|TKT_HUMAN	438.197	28	28	350	412	304	301	311	327	1040	965	1.07772	Oxidation (M); Carbamidomethylation	67877.6	Transketolase OS=Homo sapiens OX=9606 GN=TKT PE=1 SV=3
118	TRUE	Q0VD83|APOBR_HUMAN	411.38	50	50	324	293	318	285	314	226	804	956	0.841004	Oxidation (M); Carbamidomethylation	115634	Apolipoprotein B receptor OS=Homo sapiens OX=9606 GN=APOBR PE=1 SV=3
208	TRUE	Q99536|VAT1_HUMAN	380.072	20	20	349	324	317	267	279	276	867	945	0.91746	Carbamidomethylation; Oxidation (M)	41920.2	Synaptic vesicle membrane protein VAT-1 homolog OS=Homo sapiens OX=9606 GN=VAT1 PE=1 SV=2
164	TRUE	Q9BUF5|TBB6_HUMAN	391.614	30	9	422	433	252	218	269	241	892	943	0.945917	Oxidation (M); Carbamidomethylation	49857.1	Tubulin beta-6 chain OS=Homo sapiens OX=9606 GN=TUBB6 PE=1 SV=1
77	TRUE	P34932|HSP74_HUMAN	436.64	45	42	311	328	232	228	390	348	904	933	0.968917	Oxidation (M); Carbamidomethylation	94330.9	Heat shock 70 kDa protein 4 OS=Homo sapiens OX=9606 GN=HSPA4 PE=1 SV=4
140	TRUE	P11215|ITAM_HUMAN	400.992	38	36	352	294	286	242	292	196	732	930	0.787097	Oxidation (M); Carbamidomethylation	127178	Integrin alpha-M OS=Homo sapiens OX=9606 GN=ITGAM PE=1 SV=2
71	TRUE	P08575|PTPRC_HUMAN	441.673	55	55	337	399	256	342	335	372	1113	928	1.19935	Oxidation (M); Carbamidomethylation	147486	Receptor-type tyrosine-protein phosphatase C OS=Homo sapiens OX=9606 GN=PTPRC PE=1 SV=3
186	TRUE	Q15084|PDIA6_HUMAN	385.019	32	32	349	385	256	255	322	268	908	927	0.979504	Oxidation (M); Carbamidomethylation	48121.3	Protein disulfide-isomerase A6 OS=Homo sapiens OX=9606 GN=PDIA6 PE=1 SV=1
1876	TRUE	Q8N0Y7|PGAM4_HUMAN	221.247	6	1	403	382	257	238	265	264	884	925	0.955676	Oxidation (M)	28776.9	Probable phosphoglycerate mutase 4 OS=Homo sapiens OX=9606 GN=PGAM4 PE=3 SV=1
76	TRUE	P07814|SYEP_HUMAN	437.933	56	56	325	307	244	272	352	322	901	921	0.978284	Oxidation (M); Carbamidomethylation	170591	Bifunctional glutamate/proline--tRNA ligase OS=Homo sapiens OX=9606 GN=EPRS1 PE=1 SV=5
99	TRUE	P11413|G6PD_HUMAN	420.671	39	39	221	190	381	294	312	260	744	914	0.814004	Carbamidomethylation; Oxidation (M)	59256.7	Glucose-6-phosphate 1-dehydrogenase OS=Homo sapiens OX=9606 GN=G6PD PE=1 SV=4
351	TRUE	P19105|ML12A_HUMAN	350.15	18	1	271	266	283	253	353	307	826	907	0.910695	Oxidation (M); Carbamidomethylation	19794.1	Myosin regulatory light chain 12A OS=Homo sapiens OX=9606 GN=MYL12A PE=1 SV=2
91	TRUE	O43852|CALU_HUMAN	429.481	27	27	478	359	192	189	234	150	698	904	0.772124	Oxidation (M)	37106.8	Calumenin OS=Homo sapiens OX=9606 GN=CALU PE=1 SV=2
96	TRUE	Q9NYU2|UGGG1_HUMAN	426.536	52	52	311	312	242	303	335	264	879	888	0.989865	Oxidation (M); Carbamidomethylation	177190	UDP-glucose:glycoprotein glucosyltransferase 1 OS=Homo sapiens OX=9606 GN=UGGT1 PE=1 SV=3
350	TRUE	O14950|ML12B_HUMAN	350.398	18	1	271	269	281	249	336	308	826	888	0.93018	Oxidation (M); Carbamidomethylation	19779.2	Myosin regulatory light chain 12B OS=Homo sapiens OX=9606 GN=MYL12B PE=1 SV=2
68	TRUE	P78527|PRKDC_HUMAN	445.133	72	72	326	360	252	270	309	296	926	887	1.04397	Carbamidomethylation; Oxidation (M)	469089	DNA-dependent protein kinase catalytic subunit OS=Homo sapiens OX=9606 GN=PRKDC PE=1 SV=3
153	TRUE	Q12906|ILF3_HUMAN	395.636	39	36	357	429	178	238	349	307	974	884	1.10181	Oxidation (M); Carbamidomethylation	95338.4	Interleukin enhancer-binding factor 3 OS=Homo sapiens OX=9606 GN=ILF3 PE=1 SV=3
295	TRUE	Q58FF7|H90B3_HUMAN	359.034	26	1	284	278	269	230	330	305	813	883	0.920725	Oxidation (M); Carbamidomethylation	68324.8	Putative heat shock protein HSP 90-beta-3 OS=Homo sapiens OX=9606 GN=HSP90AB3P PE=5 SV=1
101	TRUE	Q7KZF4|SND1_HUMAN	419.313	43	43	276	298	281	269	317	279	846	874	0.967963	Oxidation (M); Carbamidomethylation	101997	Staphylococcal nuclease domain-containing protein 1 OS=Homo sapiens OX=9606 GN=SND1 PE=1 SV=1
114	TRUE	Q16555|DPYL2_HUMAN	412.25	36	31	257	214	347	270	270	228	712	874	0.814645	Carbamidomethylation; Oxidation (M)	62293.6	Dihydropyrimidinase-related protein 2 OS=Homo sapiens OX=9606 GN=DPYSL2 PE=1 SV=1
488	TRUE	P30040|ERP29_HUMAN	330.436	15	15	337	325	273	266	258	239	830	868	0.956221	Carbamidomethylation; Oxidation (M)	28993.4	Endoplasmic reticulum resident protein 29 OS=Homo sapiens OX=9606 GN=ERP29 PE=1 SV=4
128	TRUE	P61978|HNRPK_HUMAN	405.652	28	28	333	327	239	274	293	266	867	865	1.00231	Oxidation (M); Carbamidomethylation	50976.2	Heterogeneous nuclear ribonucleoprotein K OS=Homo sapiens OX=9606 GN=HNRNPK PE=1 SV=1
269	TRUE	P15311|EZRI_HUMAN	366.11	30	24	355	378	266	248	243	243	869	864	1.00579	Oxidation (M); Carbamidomethylation	69412.8	Ezrin OS=Homo sapiens OX=9606 GN=EZR PE=1 SV=4
161	TRUE	Q32MZ4|LRRF1_HUMAN	392.207	29	28	283	251	236	234	340	283	768	859	0.894063	Oxidation (M); Carbamidomethylation	89253	Leucine-rich repeat flightless-interacting protein 1 OS=Homo sapiens OX=9606 GN=LRRFIP1 PE=1 SV=2
397	TRUE	P37802|TAGL2_HUMAN	342.212	18	18	199	227	285	312	368	340	879	852	1.03169	Carbamidomethylation; Oxidation (M)	22391.4	Transgelin-2 OS=Homo sapiens OX=9606 GN=TAGLN2 PE=1 SV=3
149	TRUE	P12956|XRCC6_HUMAN	397.188	28	28	289	331	246	252	311	299	882	846	1.04255	Oxidation (M)	69843.1	X-ray repair cross-complementing protein 6 OS=Homo sapiens OX=9606 GN=XRCC6 PE=1 SV=2
198	TRUE	P04080|CYTB_HUMAN	382.025	27	27	393	285	231	182	217	155	622	841	0.739596	Carbamidomethylation; Oxidation (M)	11139.6	Cystatin-B OS=Homo sapiens OX=9606 GN=CSTB PE=1 SV=2
141	TRUE	P52790|HXK3_HUMAN	400.967	33	31	189	185	315	320	335	319	824	839	0.982122	Carbamidomethylation; Oxidation (M)	99025.4	Hexokinase-3 OS=Homo sapiens OX=9606 GN=HK3 PE=1 SV=2
122	TRUE	P20810|ICAL_HUMAN	410.881	36	36	357	349	258	250	222	232	831	837	0.992832	Carbamidomethylation; Oxidation (M)	76572.8	Calpastatin OS=Homo sapiens OX=9606 GN=CAST PE=1 SV=4
1446	TRUE	P61204|ARF3_HUMAN	246.499	10	5	269	335	238	253	329	346	934	836	1.11722	Oxidation (M)	20600.8	ADP-ribosylation factor 3 OS=Homo sapiens OX=9606 GN=ARF3 PE=1 SV=2
1446	TRUE	P84077|ARF1_HUMAN	246.499	10	5	269	335	238	253	329	346	934	836	1.11722	Oxidation (M)	20696.8	ADP-ribosylation factor 1 OS=Homo sapiens OX=9606 GN=ARF1 PE=1 SV=2
959	TRUE	P60953|CDC42_HUMAN	279.886	10	9	339	308	224	227	269	267	802	832	0.963942	Carbamidomethylation	21258.6	Cell division control protein 42 homolog OS=Homo sapiens OX=9606 GN=CDC42 PE=1 SV=2
102	TRUE	P49748|ACADV_HUMAN	418.952	32	32	290	318	214	250	326	309	877	830	1.05663	Oxidation (M); Carbamidomethylation	70390.1	Very long-chain specific acyl-CoA dehydrogenase, mitochondrial OS=Homo sapiens OX=9606 GN=ACADVL PE=1 SV=1
129	TRUE	P08567|PLEK_HUMAN	405.381	22	22	222	268	238	264	350	387	919	810	1.13457	Carbamidomethylation; Oxidation (M)	40124.9	Pleckstrin OS=Homo sapiens OX=9606 GN=PLEK PE=1 SV=3
[truncated: 6,149 more rows]

## Sheet: Table 3
Protein Group	Top	Accession		-10LgP	#Peptides	#Unique	#Spec D6_US_WP	#Spec D6_S_WP	#Spec D5_US_WP	#Spec D5_S_WP	#Spec D4_US_WP	#Spec D4_S_WP	S_Sum	US_Sum	S/US	PTM	Average Mass	Description
[truncated: 241 more rows]

[truncated: 1 more sheets: Table 4]
